# Supplementary material
Source: PubMed Central journal article supplement (PMC4308744)
Supplement: ja512213c_si_002.pdf [file ja512213c_si_002.pdf]

**Direct Enantioselective Conjugate Addition of Carboxylic Acids with Chiral Lithium  
Amides as Traceless Auxiliaries**

Ping Lu, Jeffrey J. Jackson, John A. Eickhoff, Armen Zakarian\*

Department of Chemistry and Biochemistry, University of California, Santa Barbara, CA 93106

**Supplementary Information 2**

Copies of  $^1\text{H}$ ,  $^{13}\text{C}$ ,  $^{19}\text{F}$  spectra and HPLC traces

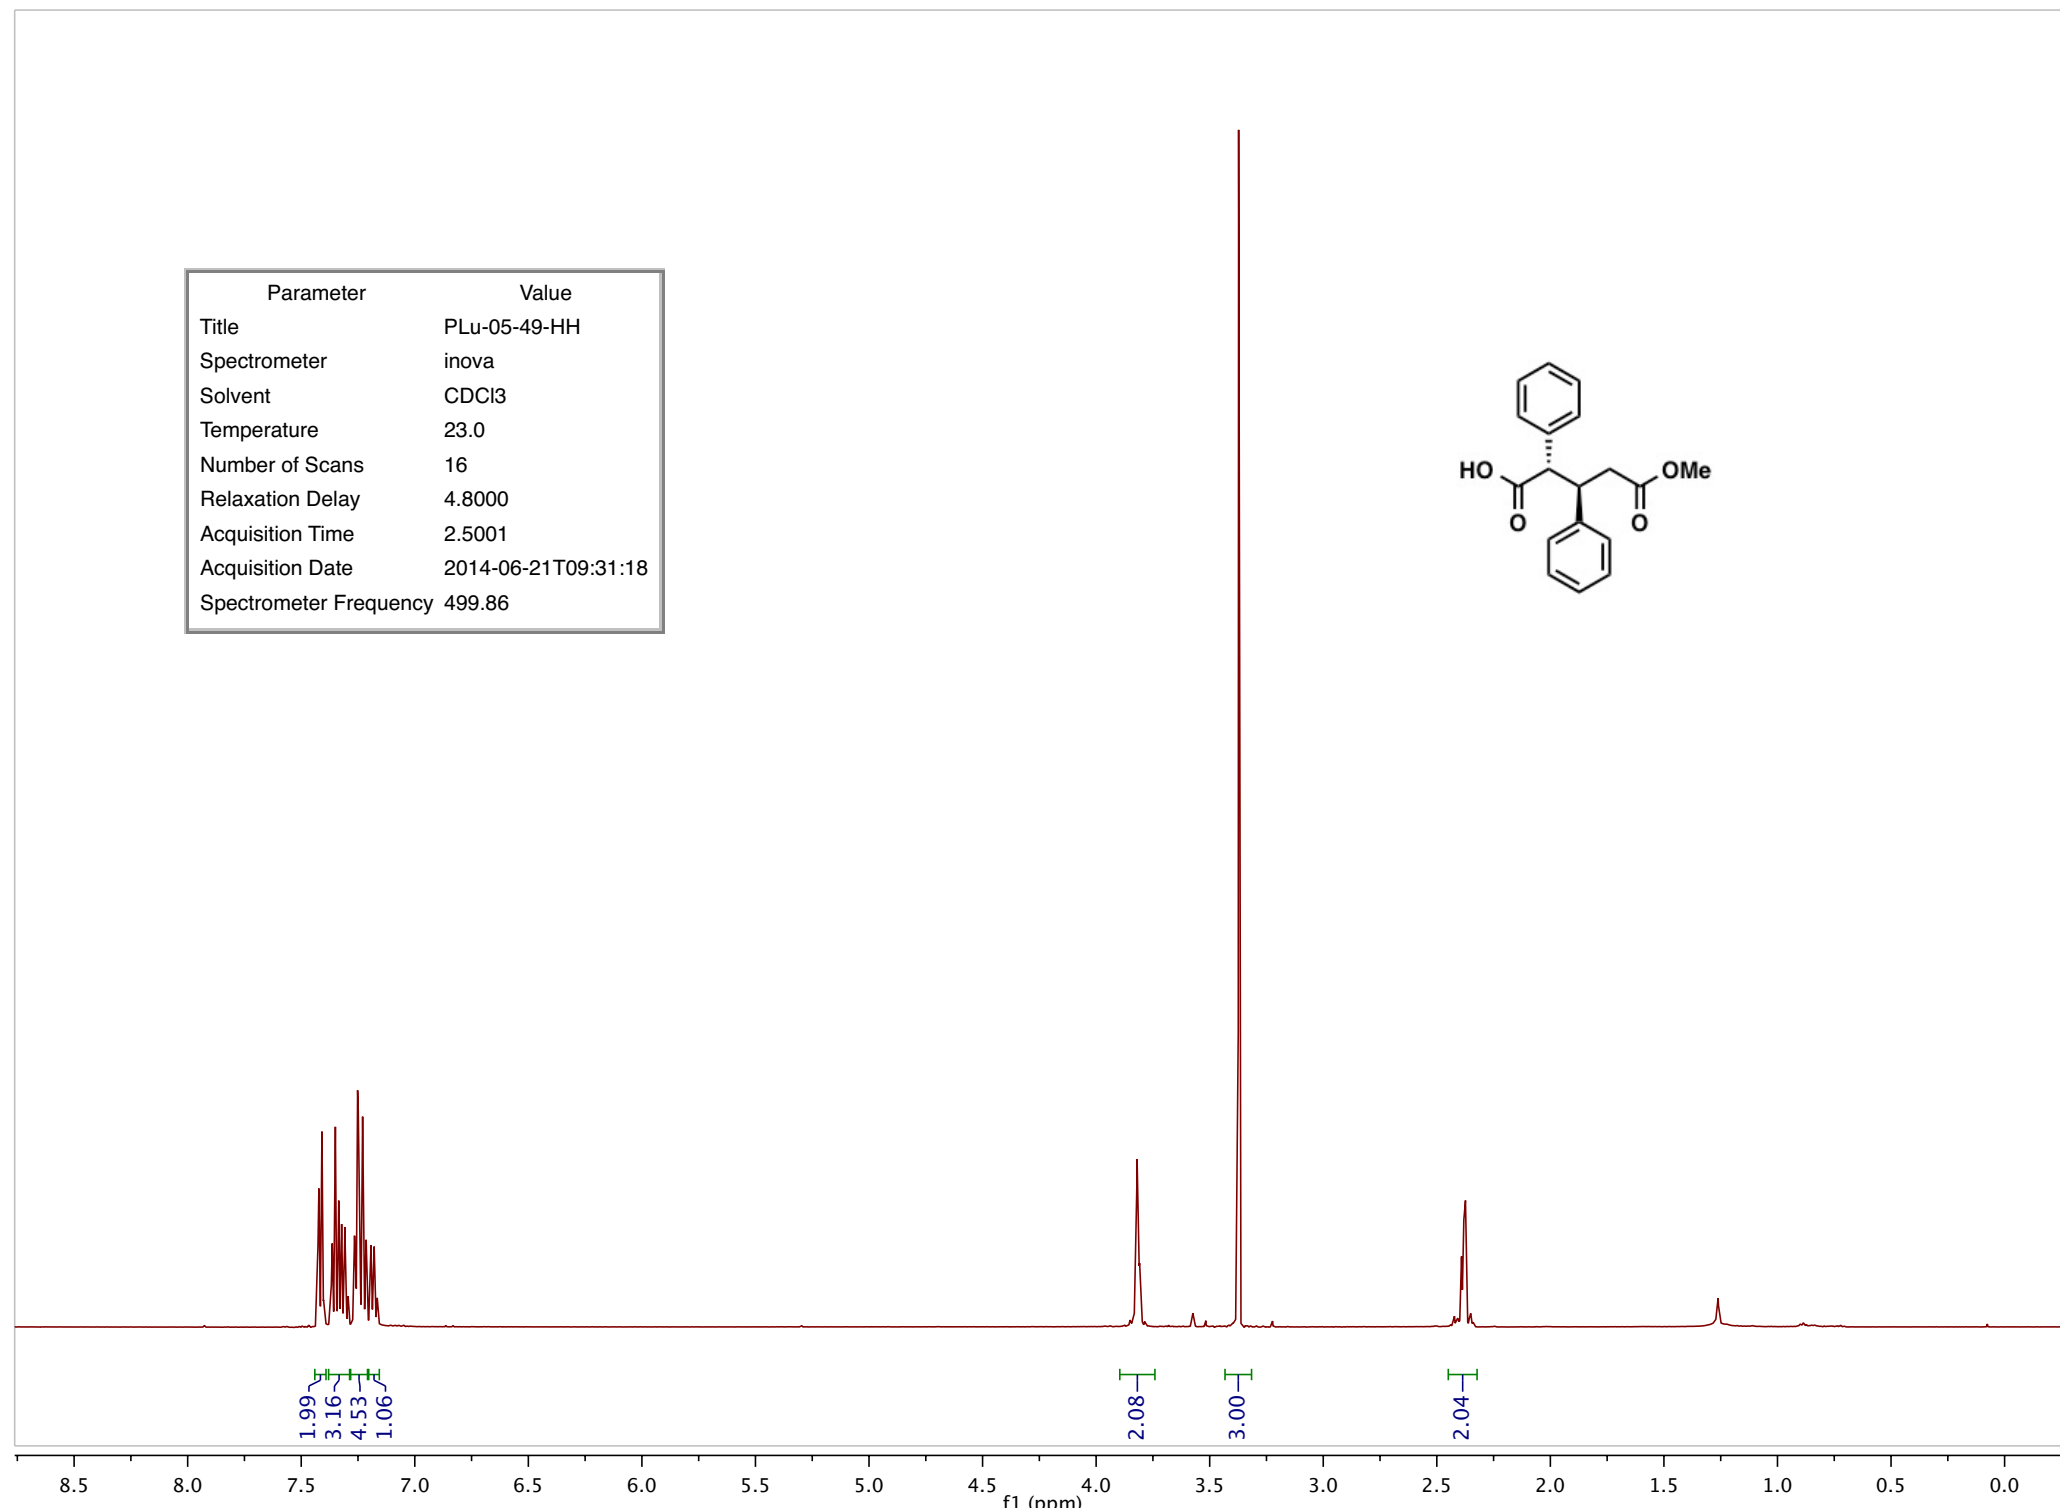

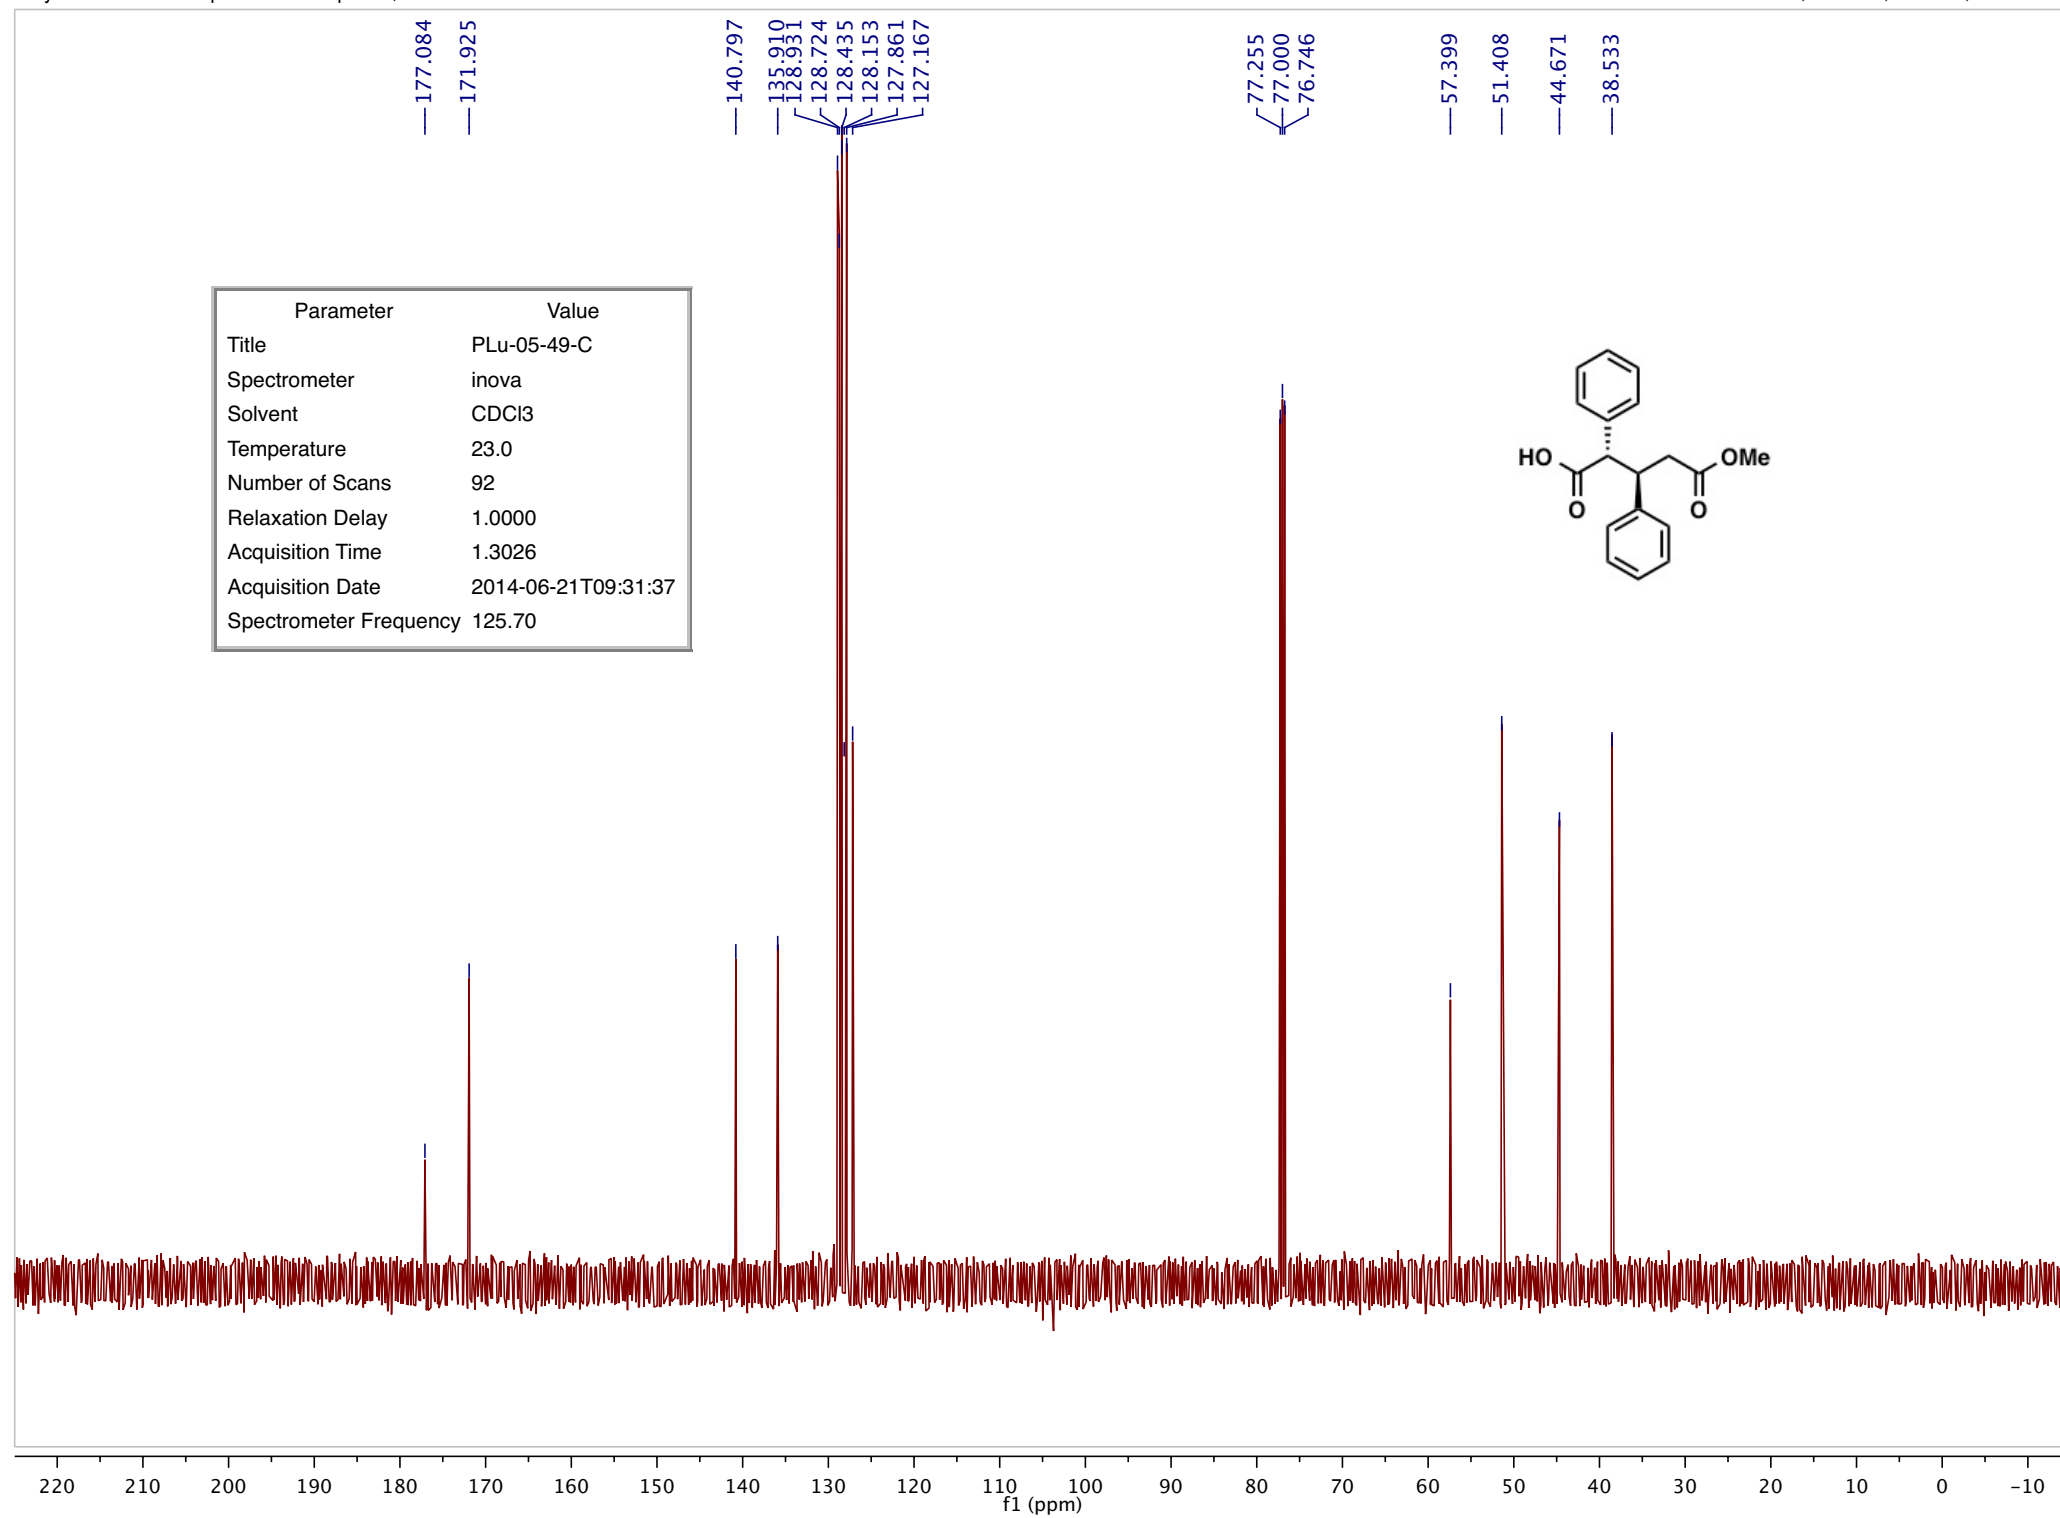

| Parameter              | Value               |
|------------------------|---------------------|
| Title                  | PLu-05-49-C         |
| Spectrometer           | inova               |
| Solvent                | CDCl3               |
| Temperature            | 23.0                |
| Number of Scans        | 92                  |
| Relaxation Delay       | 1.0000              |
| Acquisition Time       | 1.3026              |
| Acquisition Date       | 2014-06-21T09:31:37 |
| Spectrometer Frequency | 125.70              |

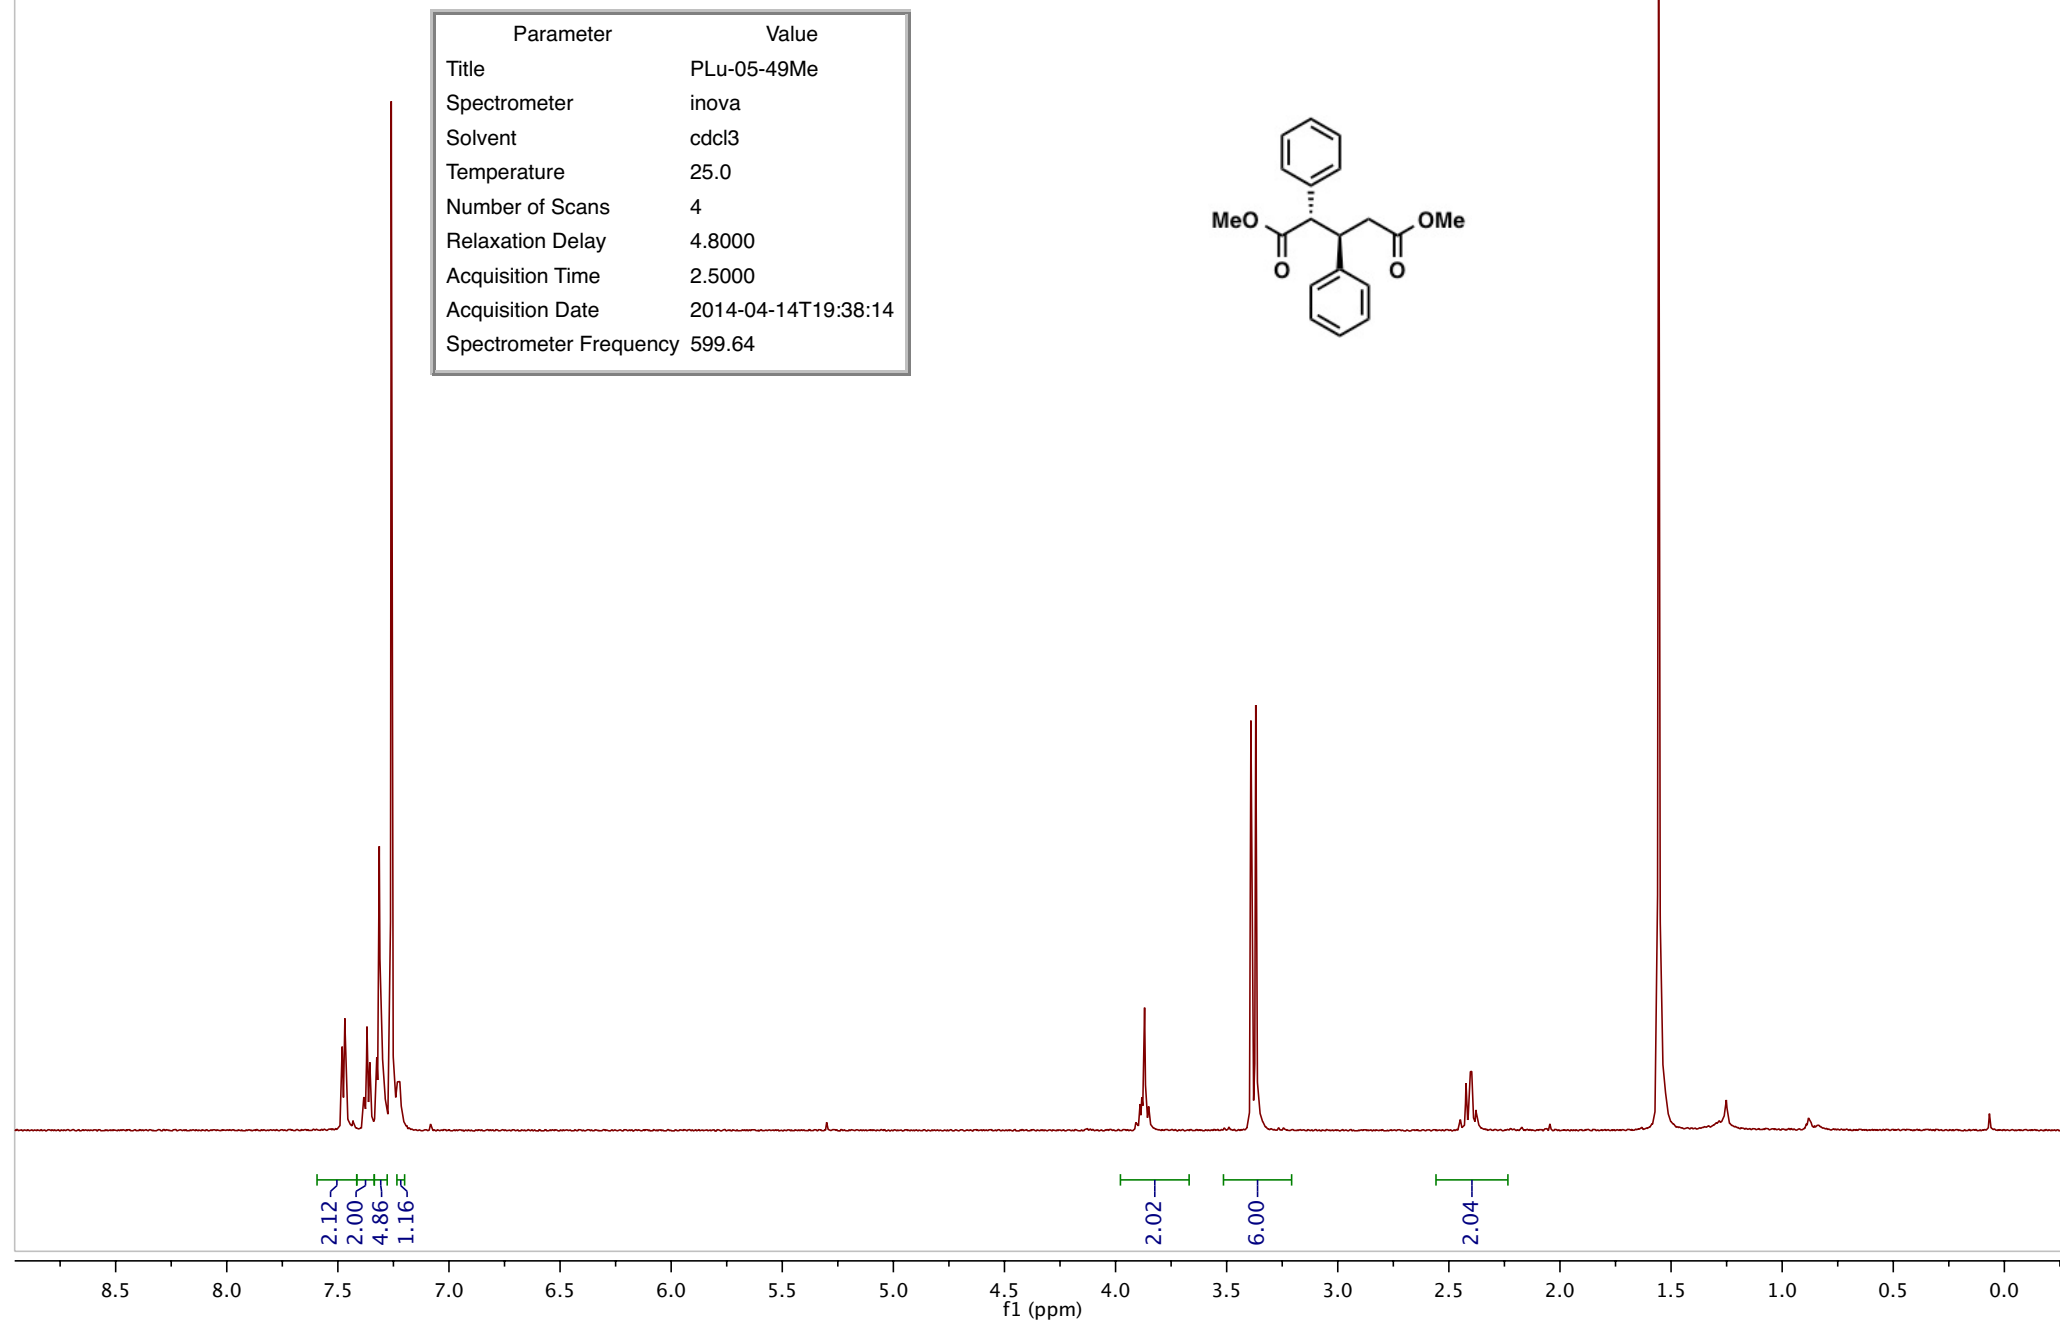

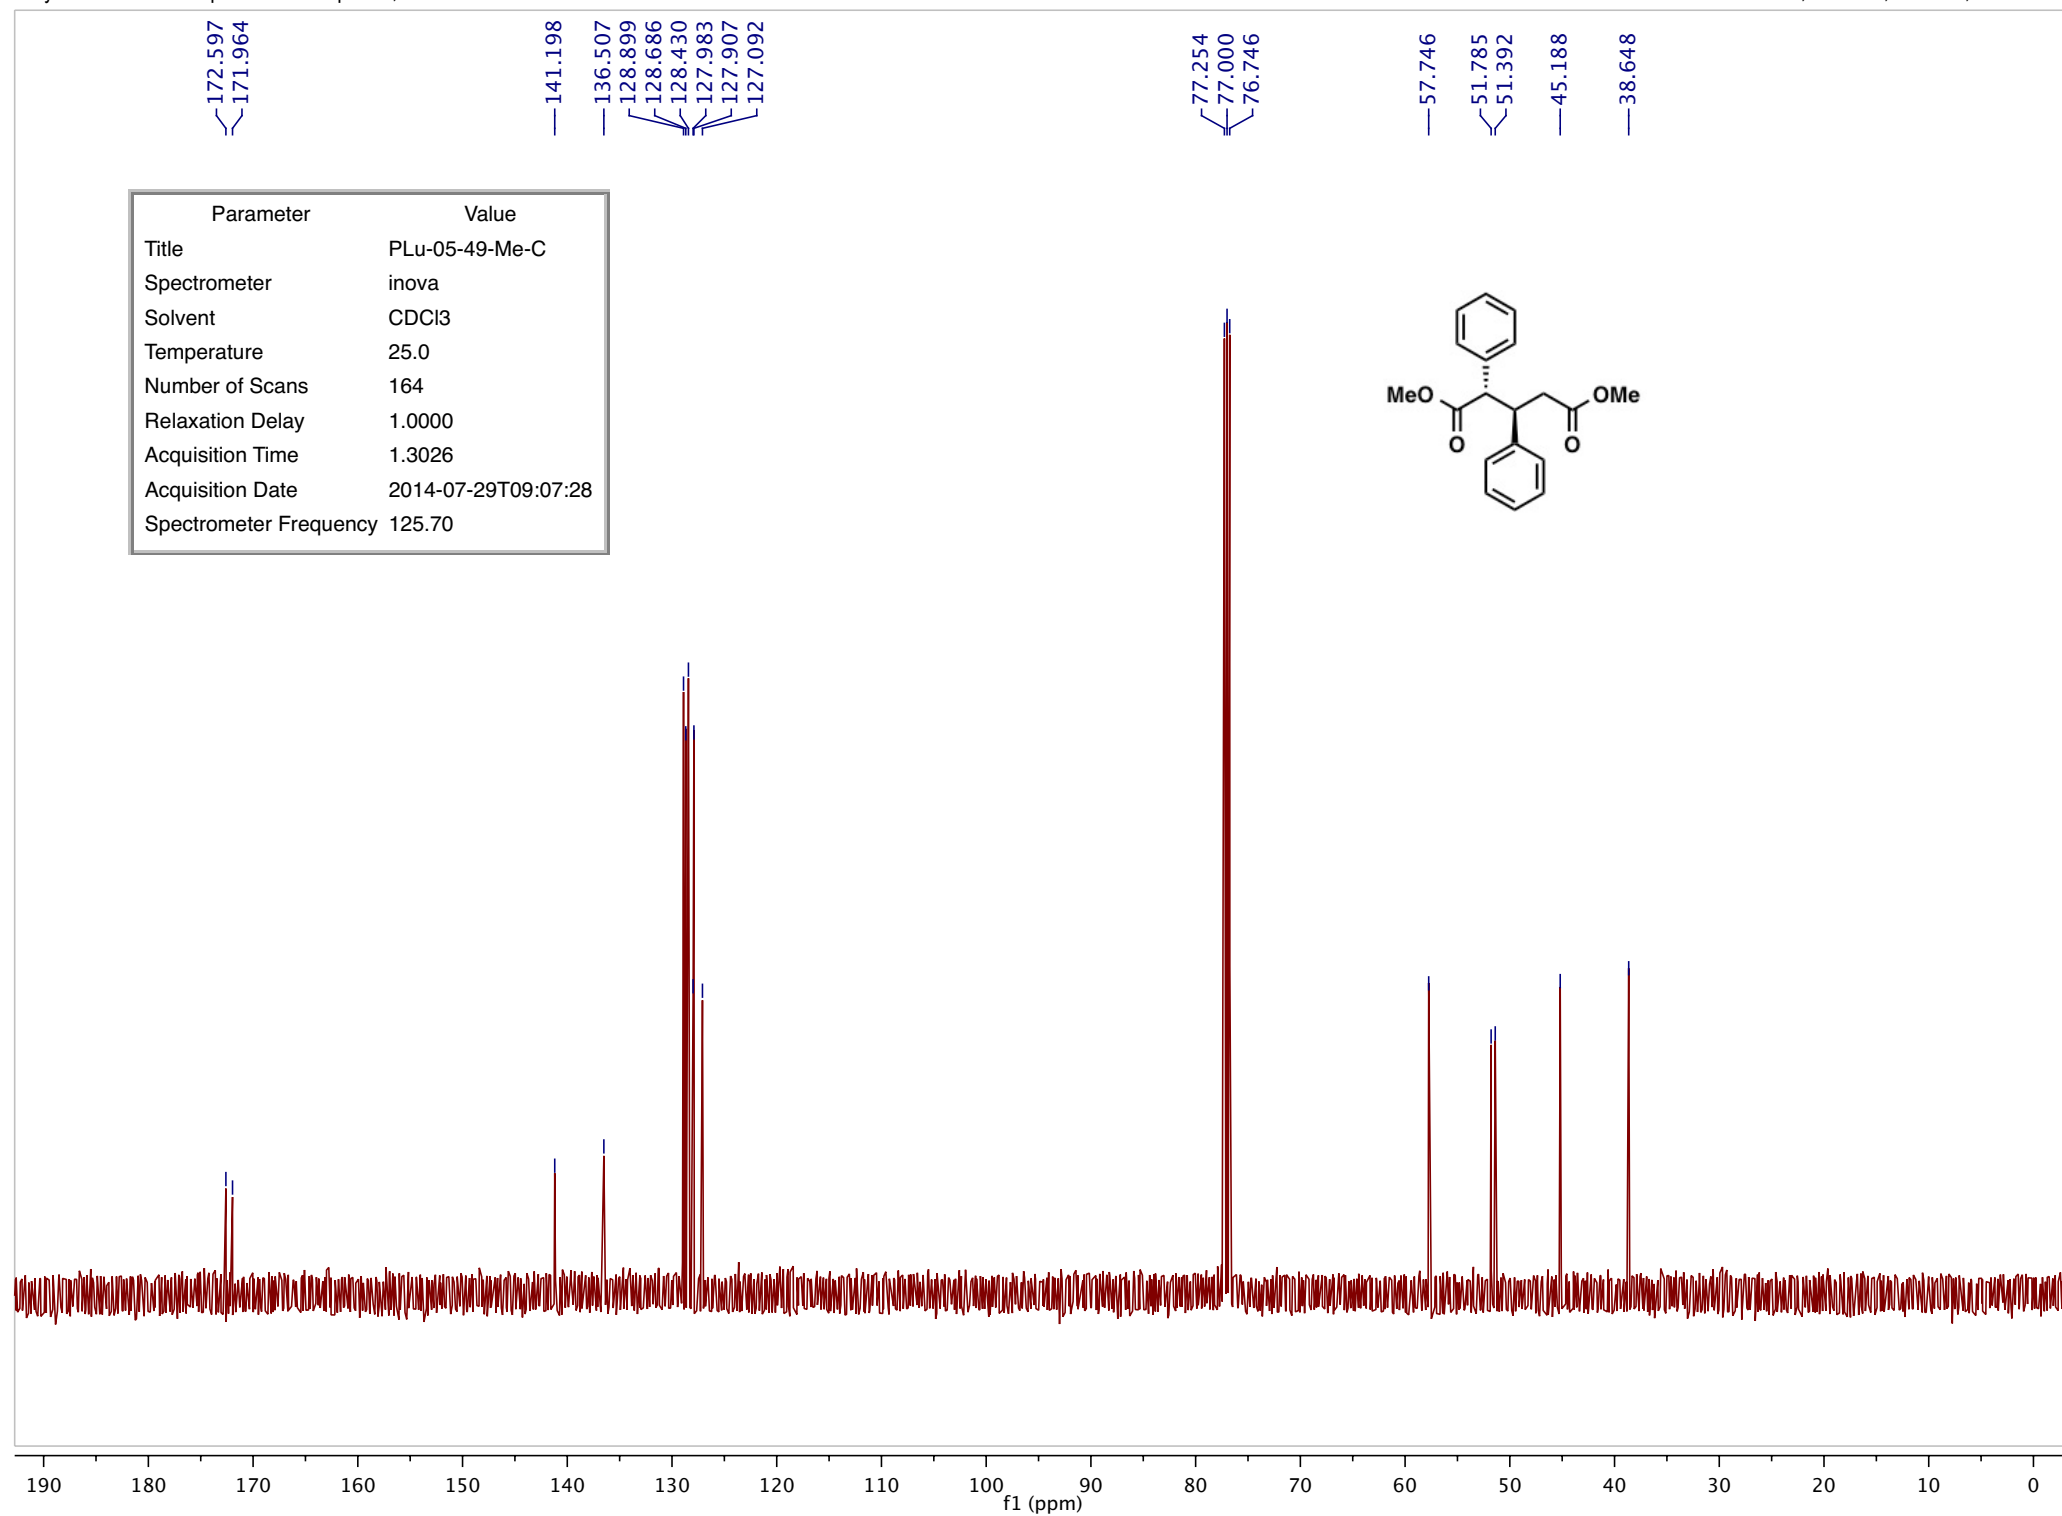

| Parameter              | Value               |
|------------------------|---------------------|
| Title                  | PLu-05-46-HH        |
| Spectrometer           | inova               |
| Solvent                | CDCl <sub>3</sub>   |
| Temperature            | 25.0                |
| Number of Scans        | 16                  |
| Relaxation Delay       | 4.8000              |
| Acquisition Time       | 2.5001              |
| Acquisition Date       | 2014-07-29T08:57:13 |
| Spectrometer Frequency | 499.86              |

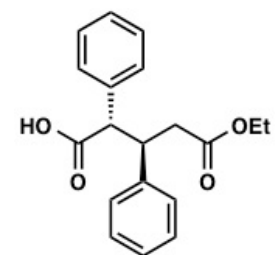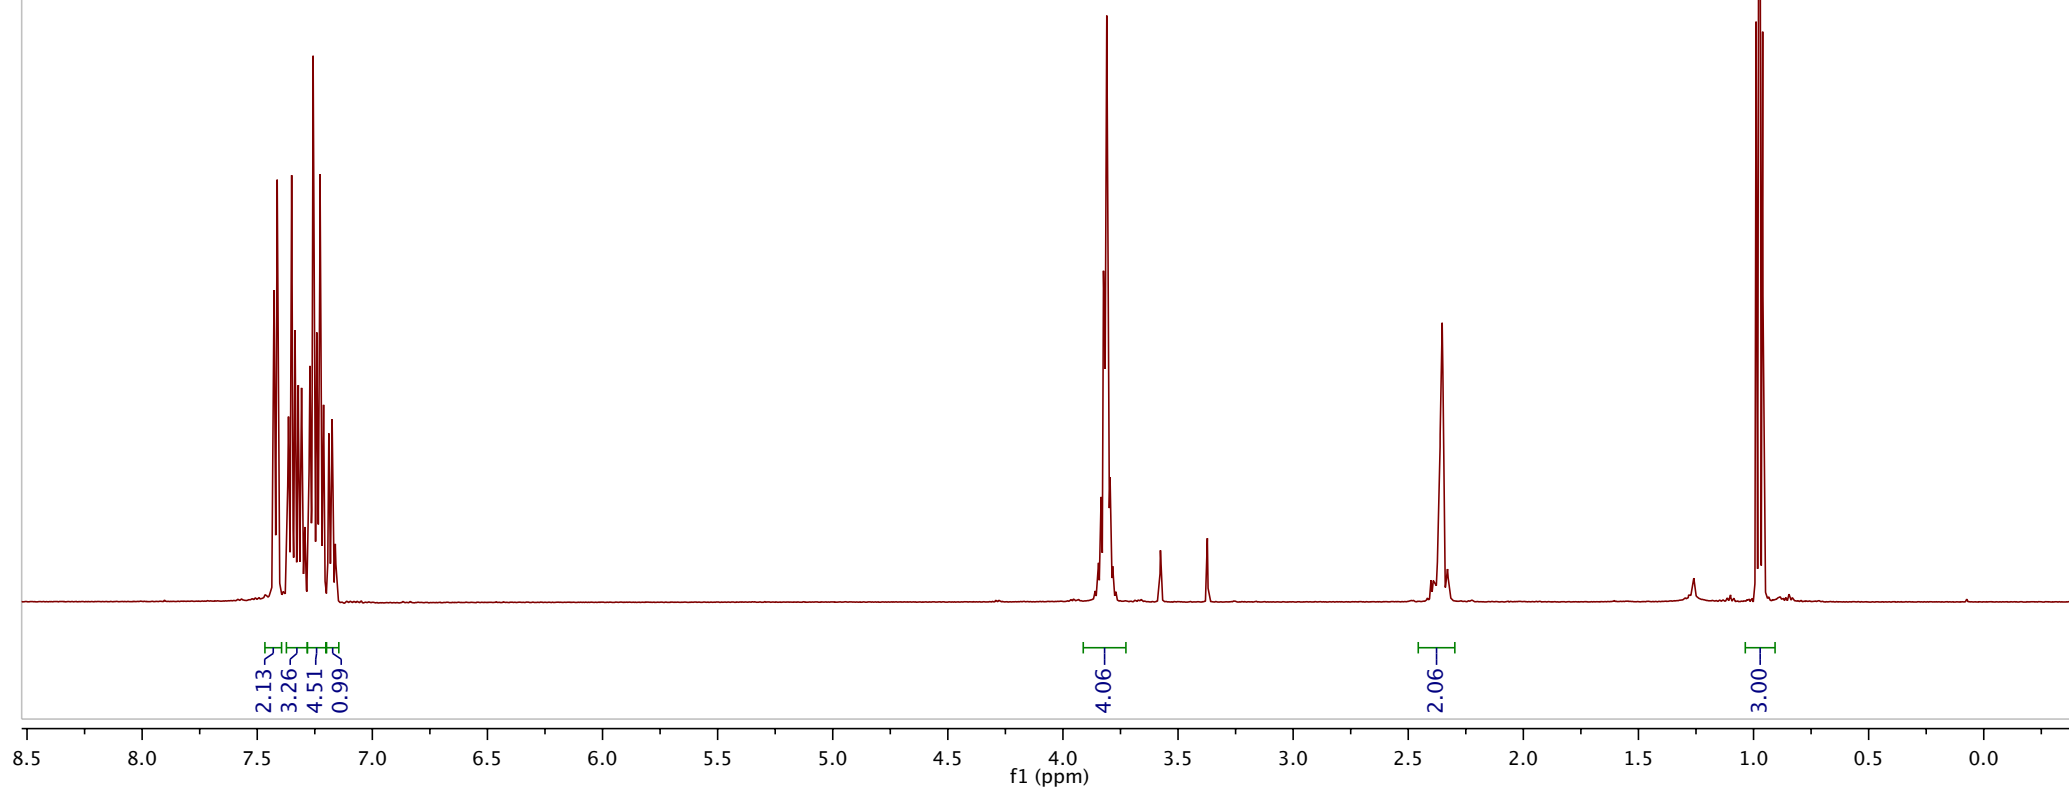

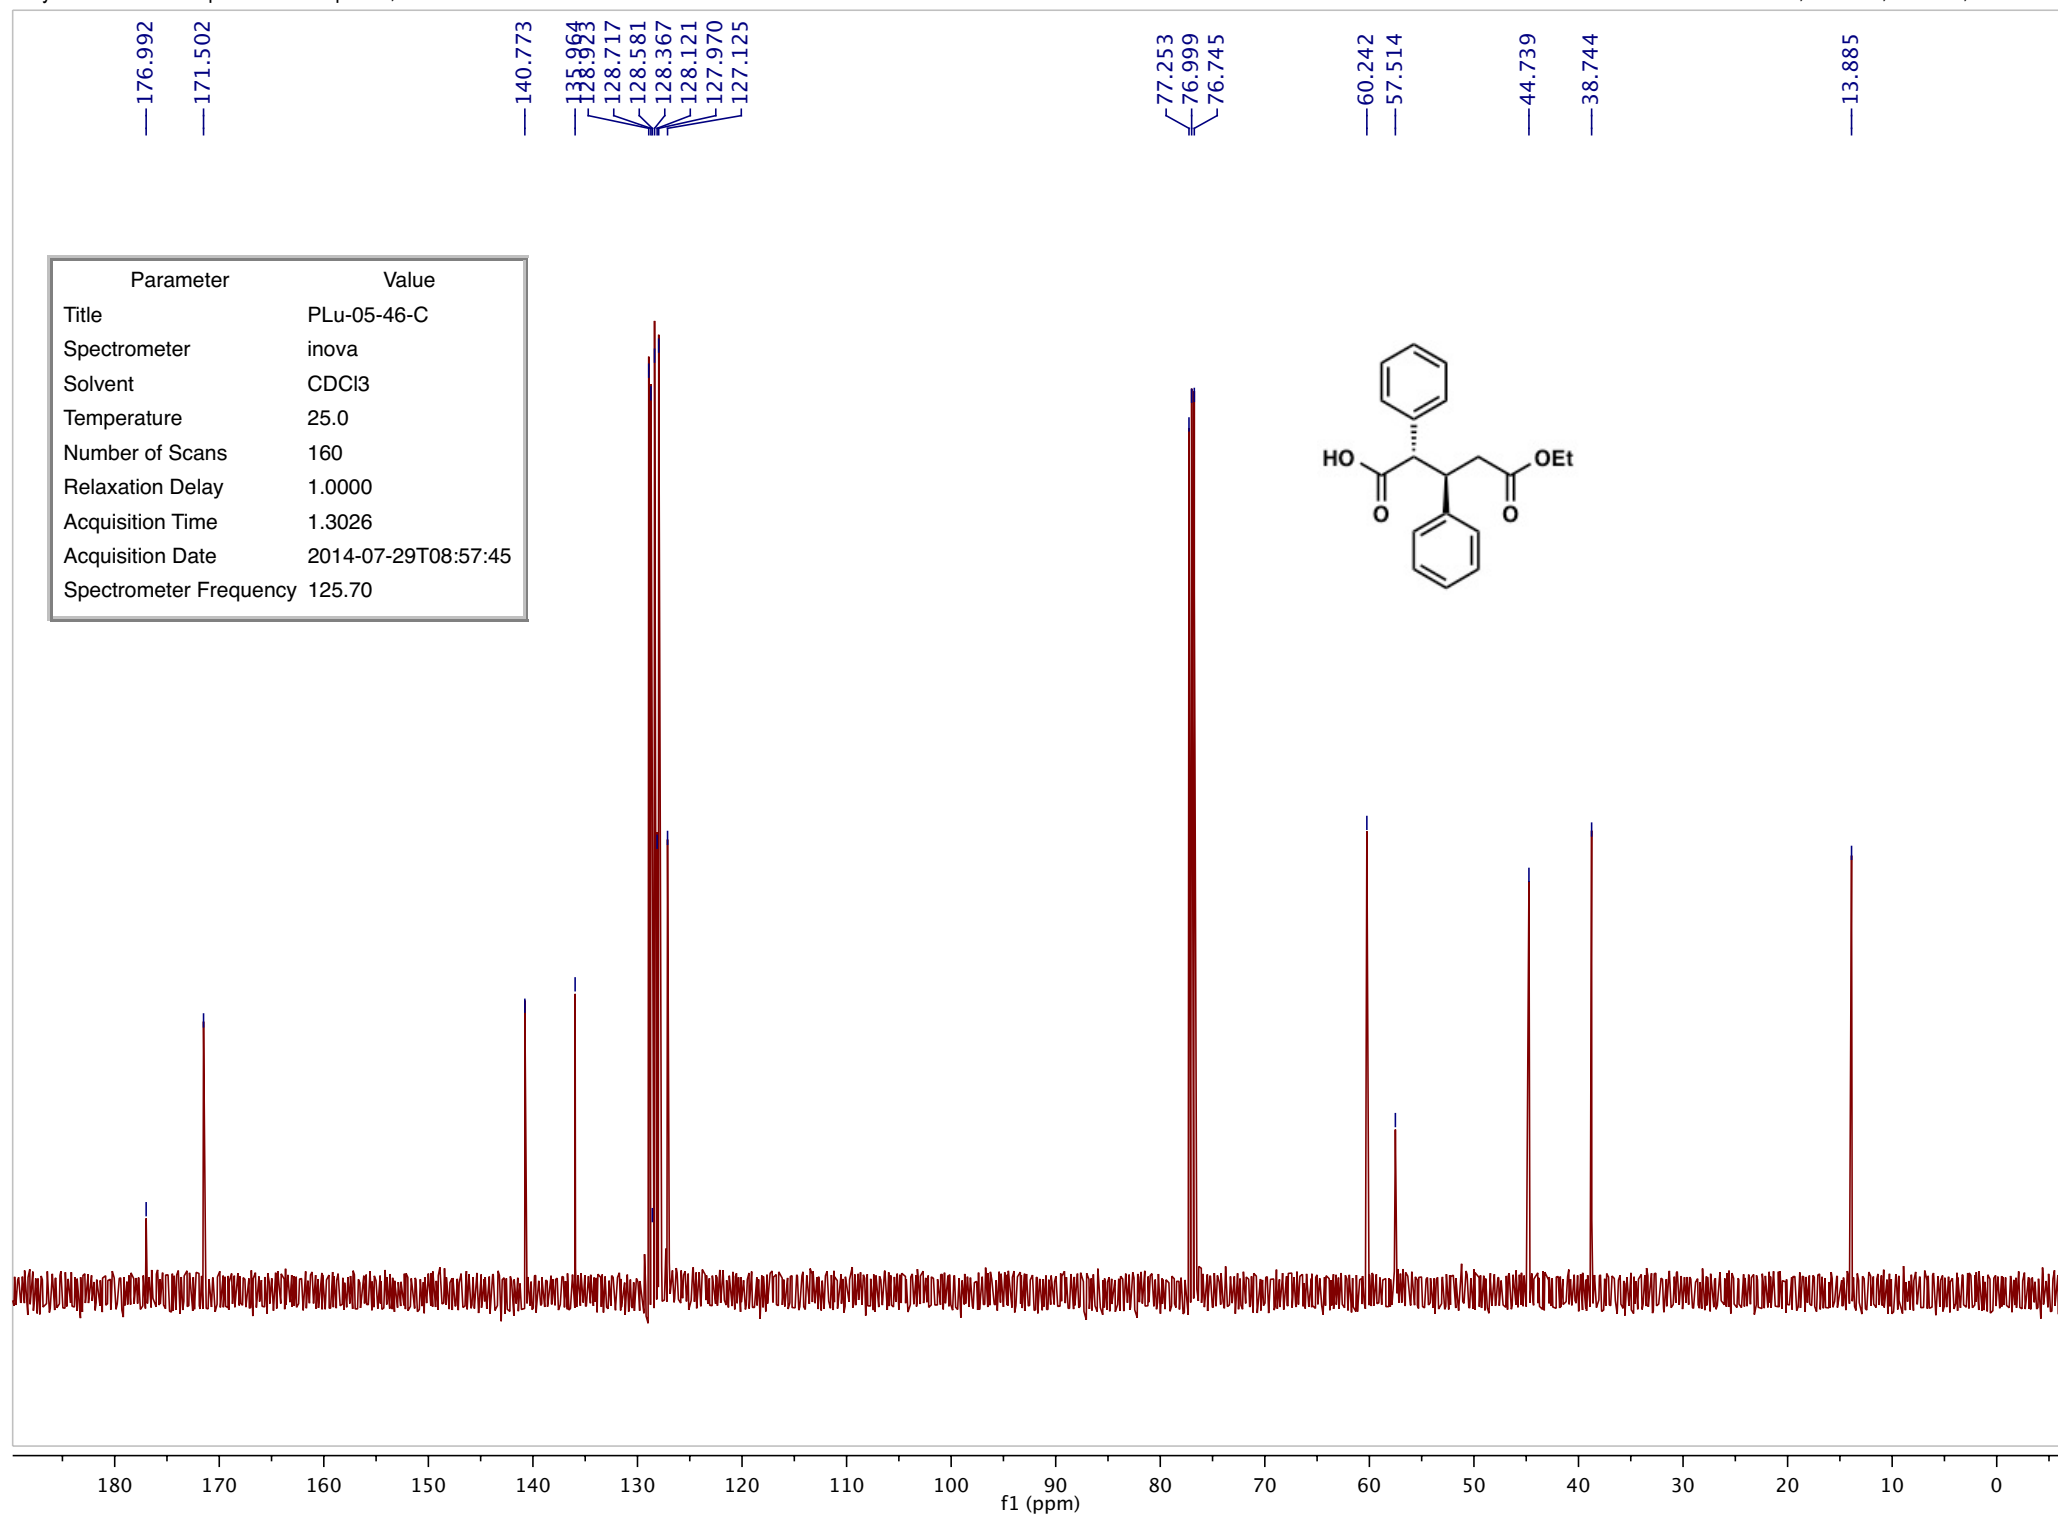

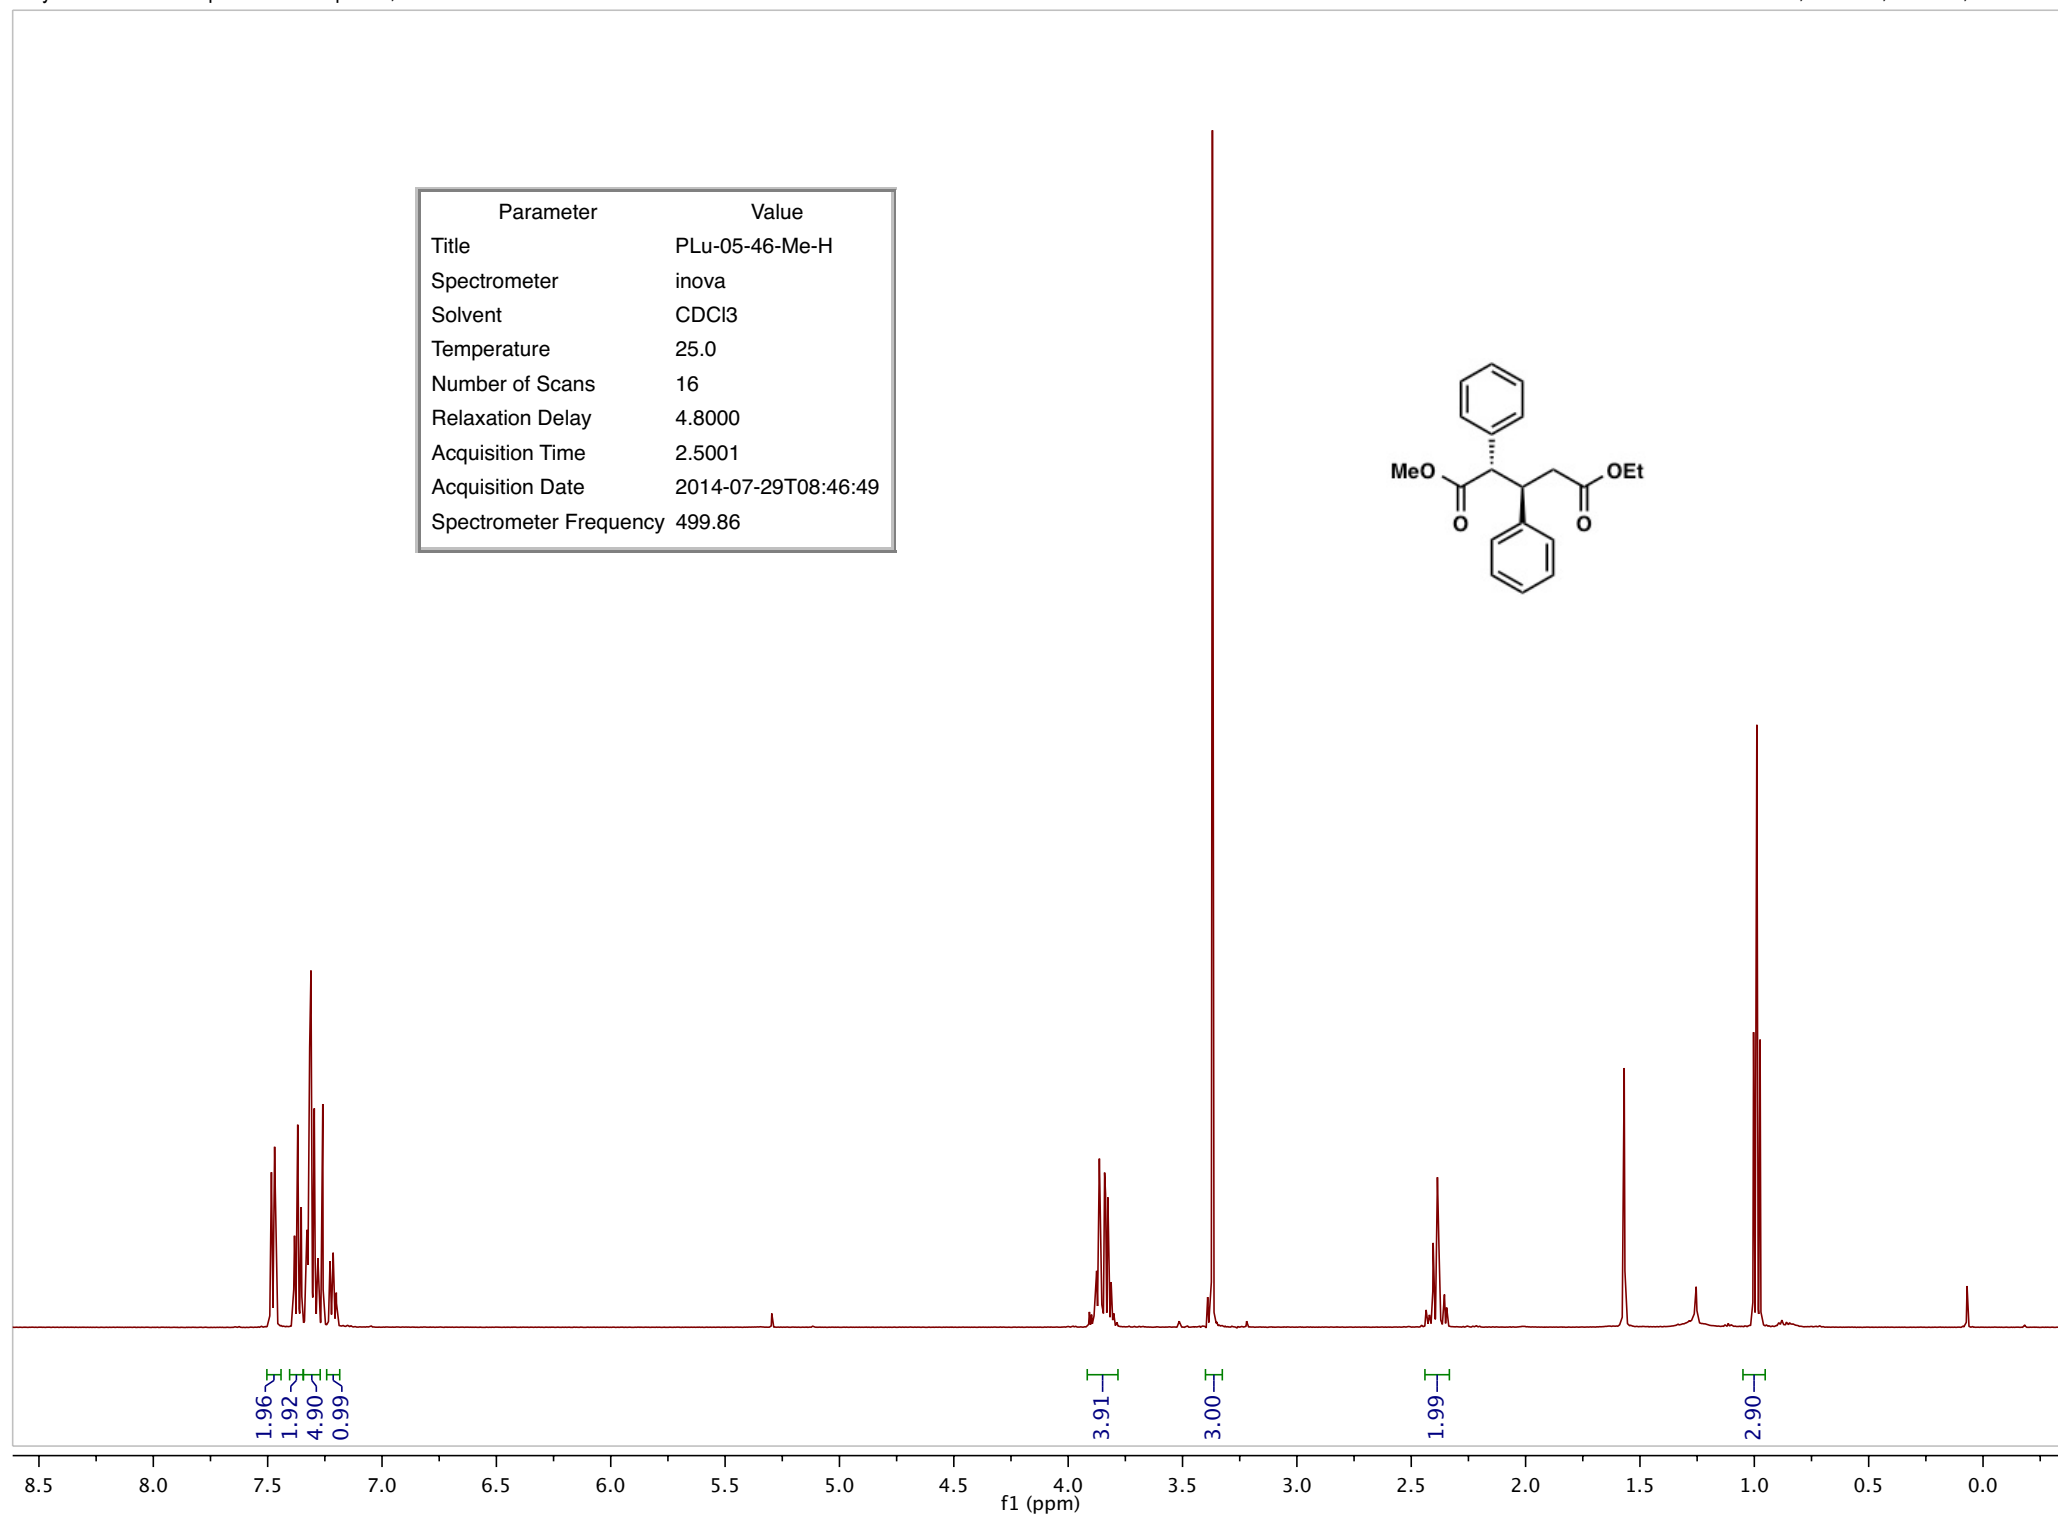



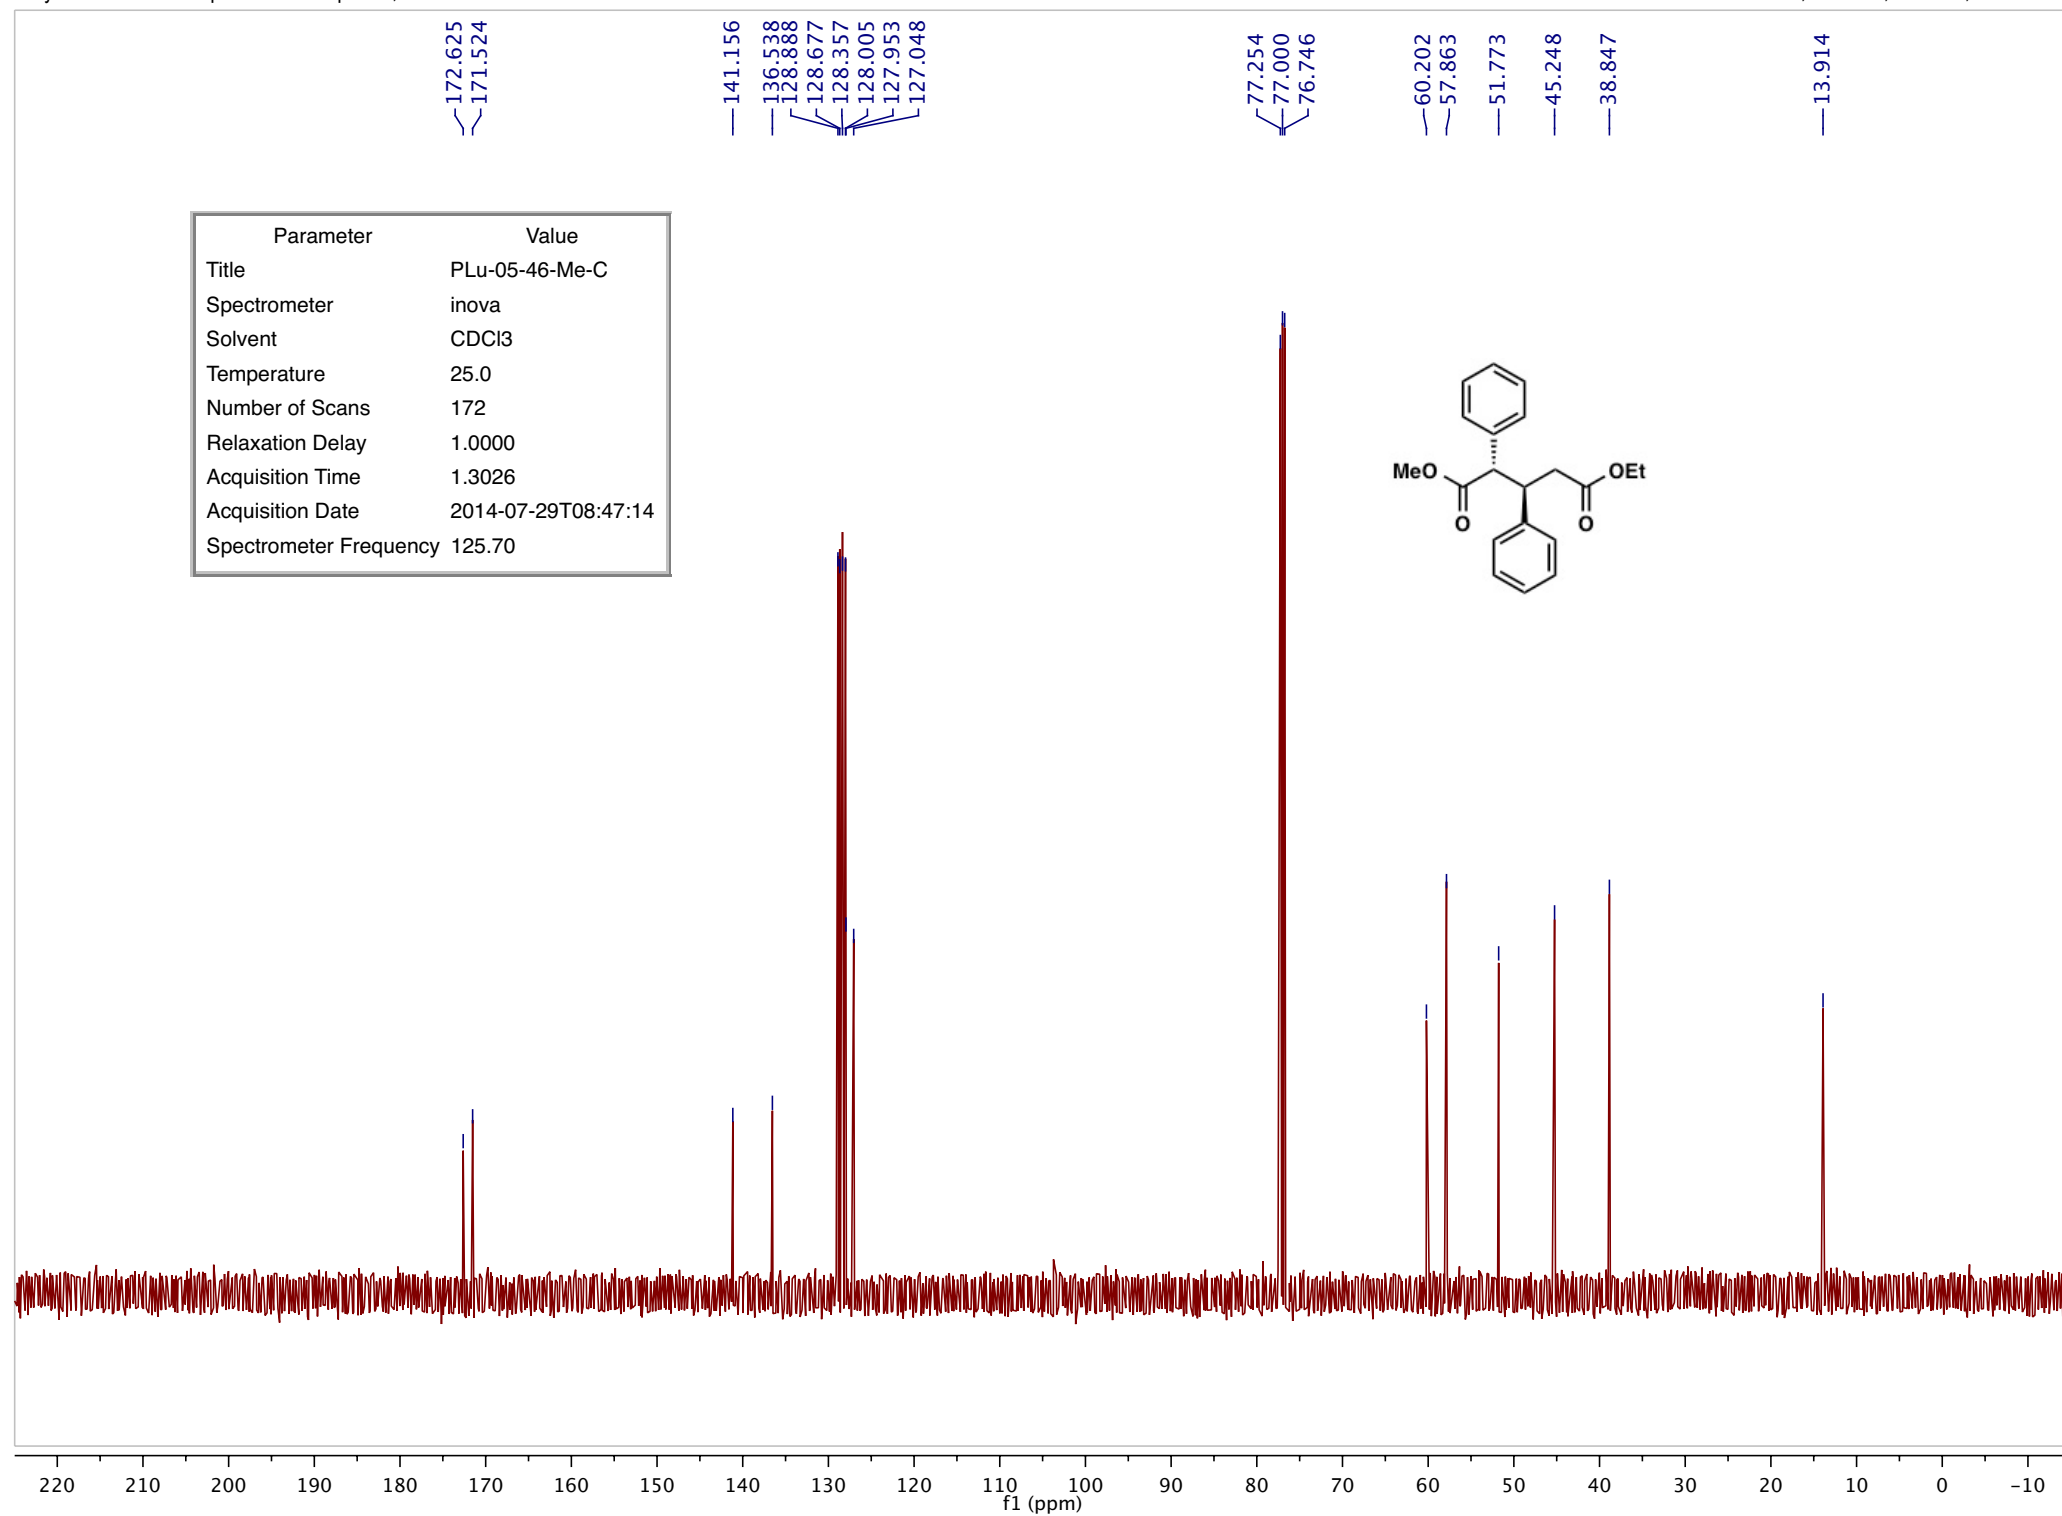

| Parameter              | Value               |
|------------------------|---------------------|
| Title                  | PLu-05-51-HH        |
| Spectrometer           | inova               |
| Solvent                | CDCl <sub>3</sub>   |
| Temperature            | 23.0                |
| Number of Scans        | 12                  |
| Relaxation Delay       | 4.8000              |
| Acquisition Time       | 2.5001              |
| Acquisition Date       | 2014-06-24T08:26:27 |
| Spectrometer Frequency | 499.86              |

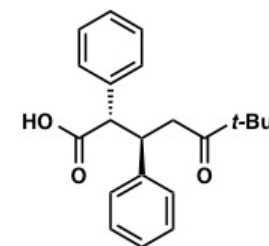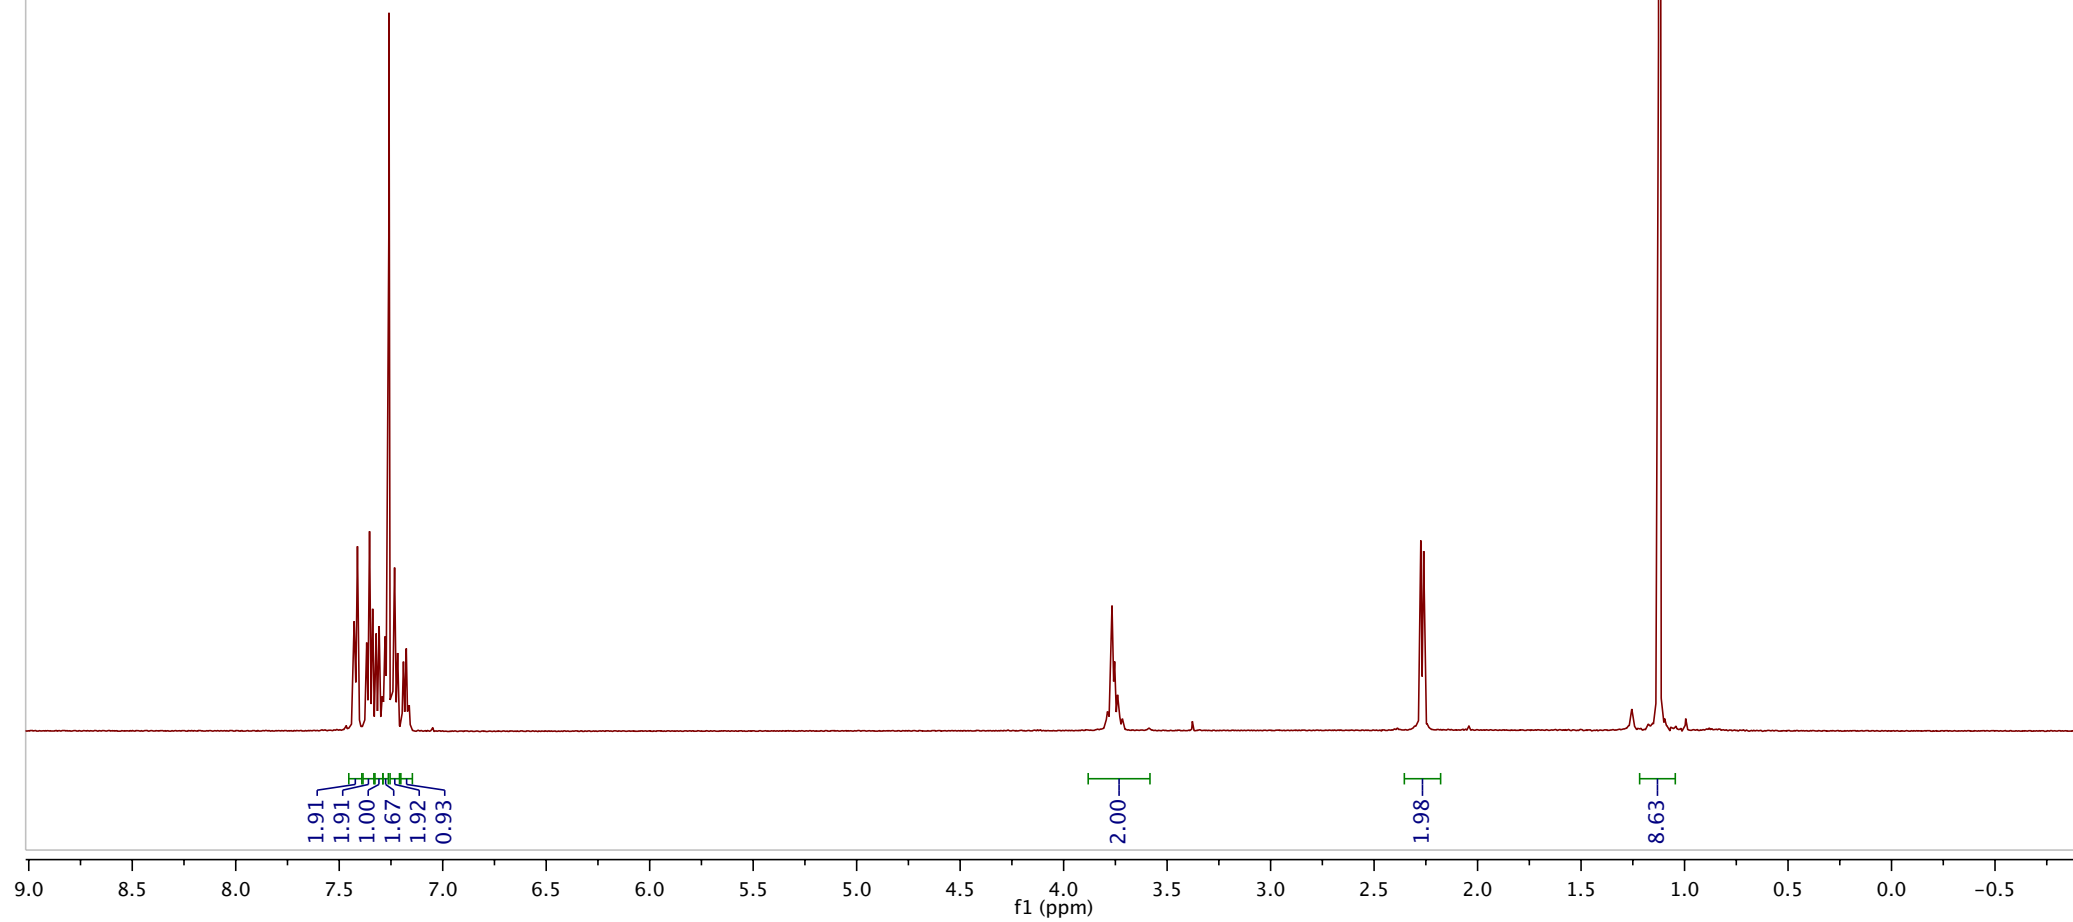

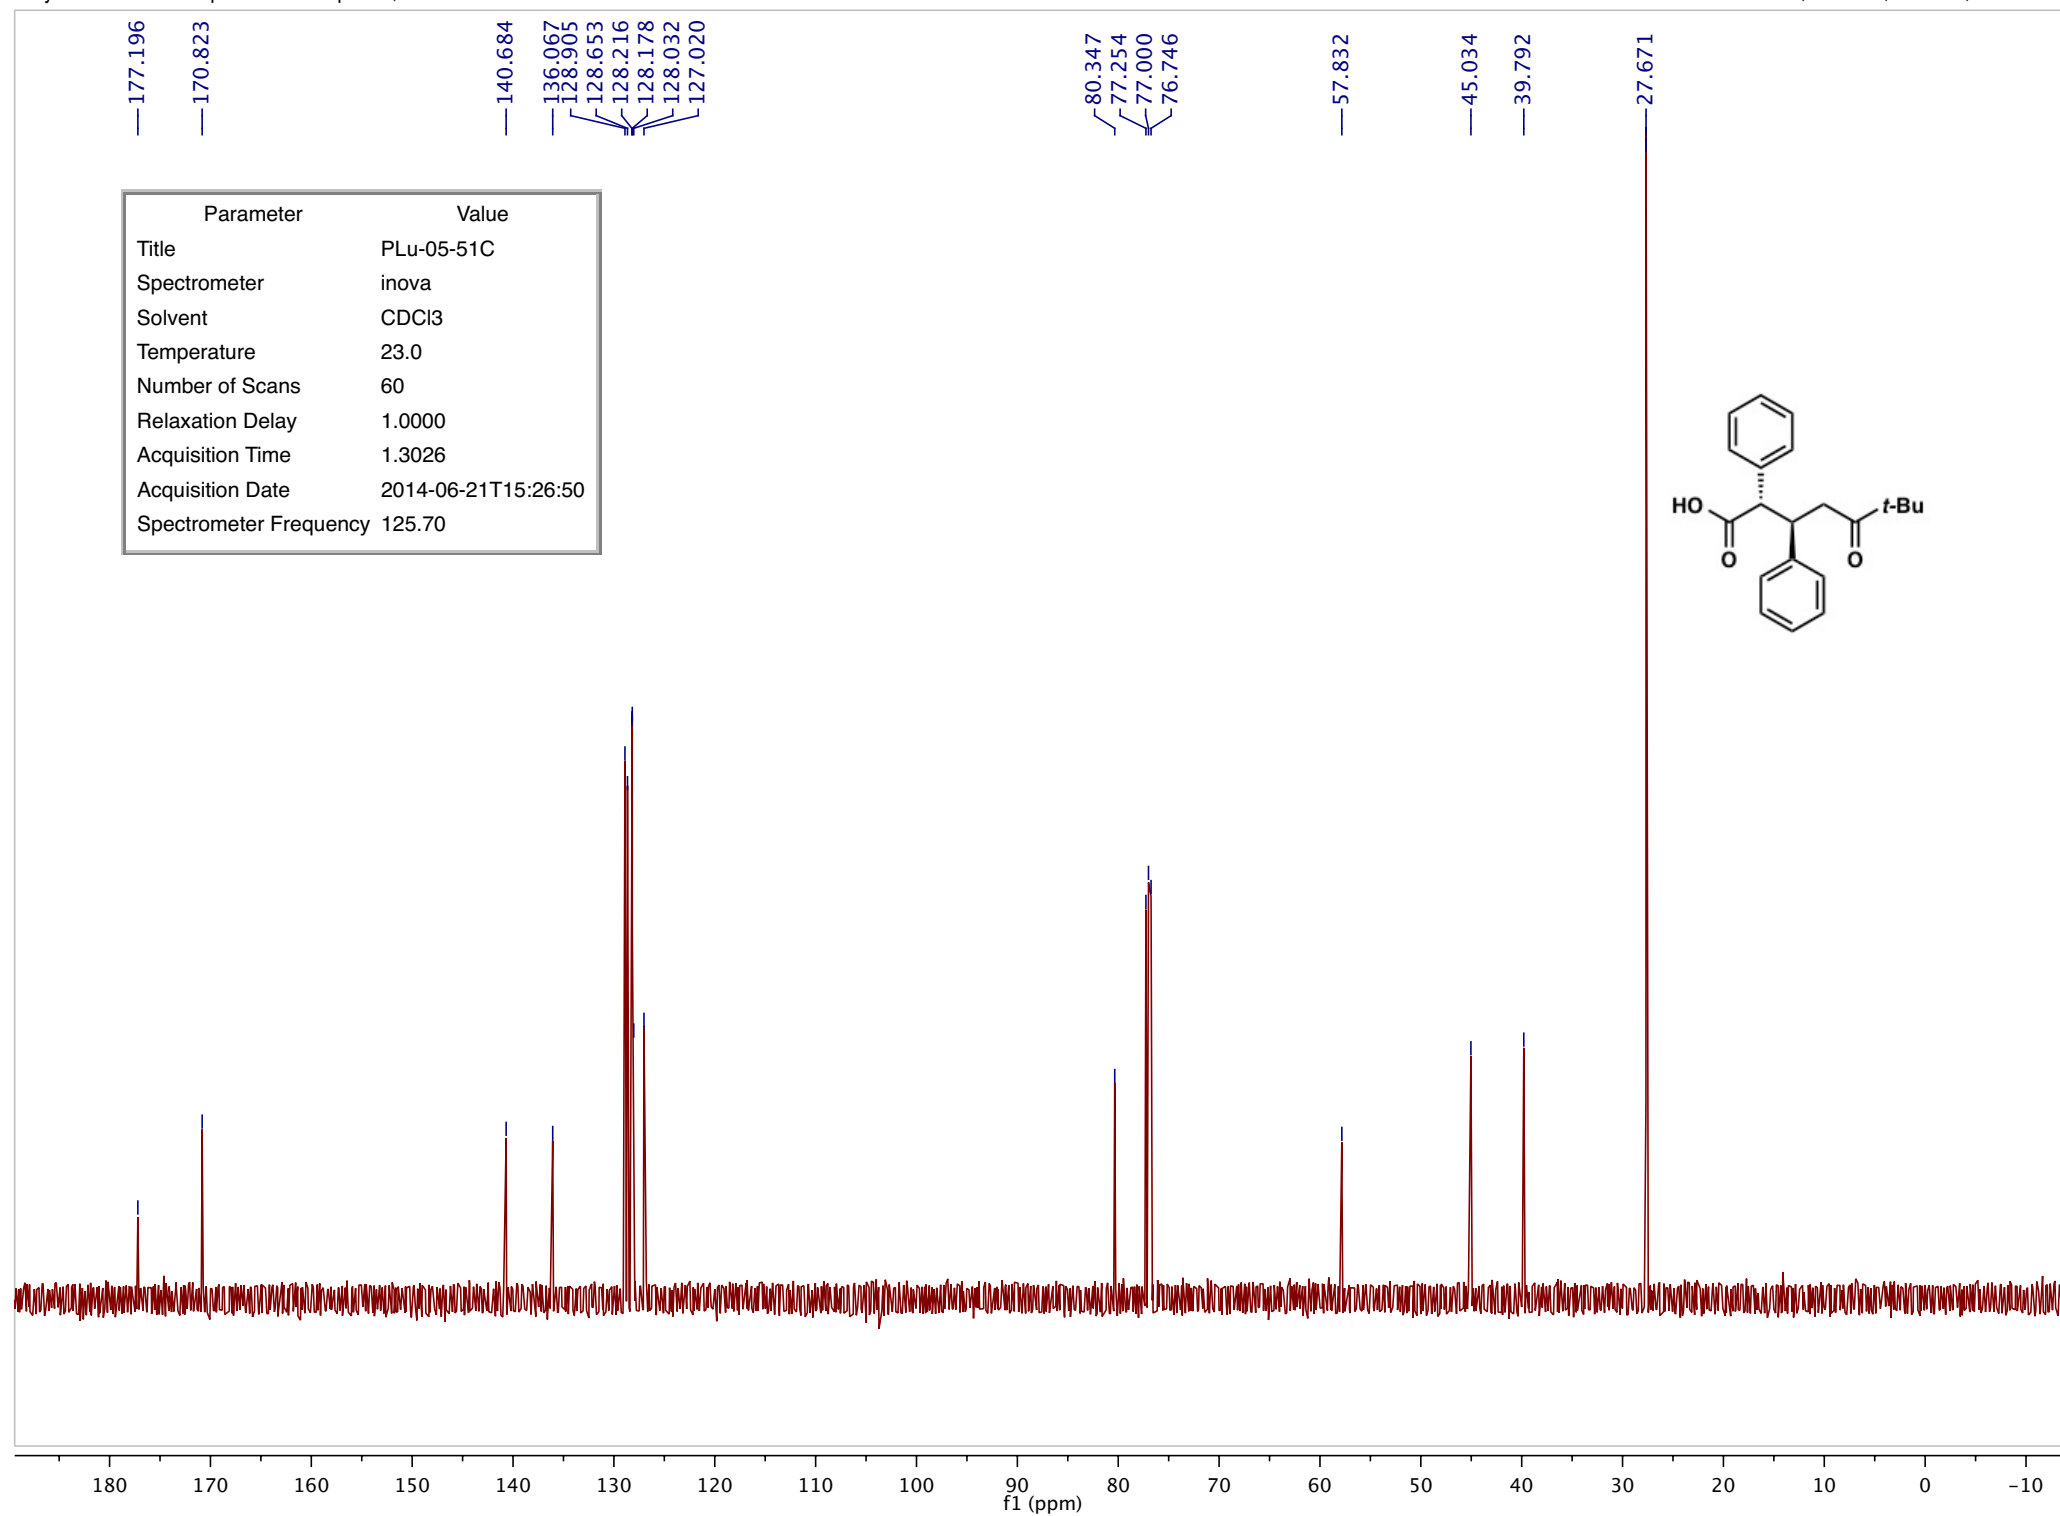

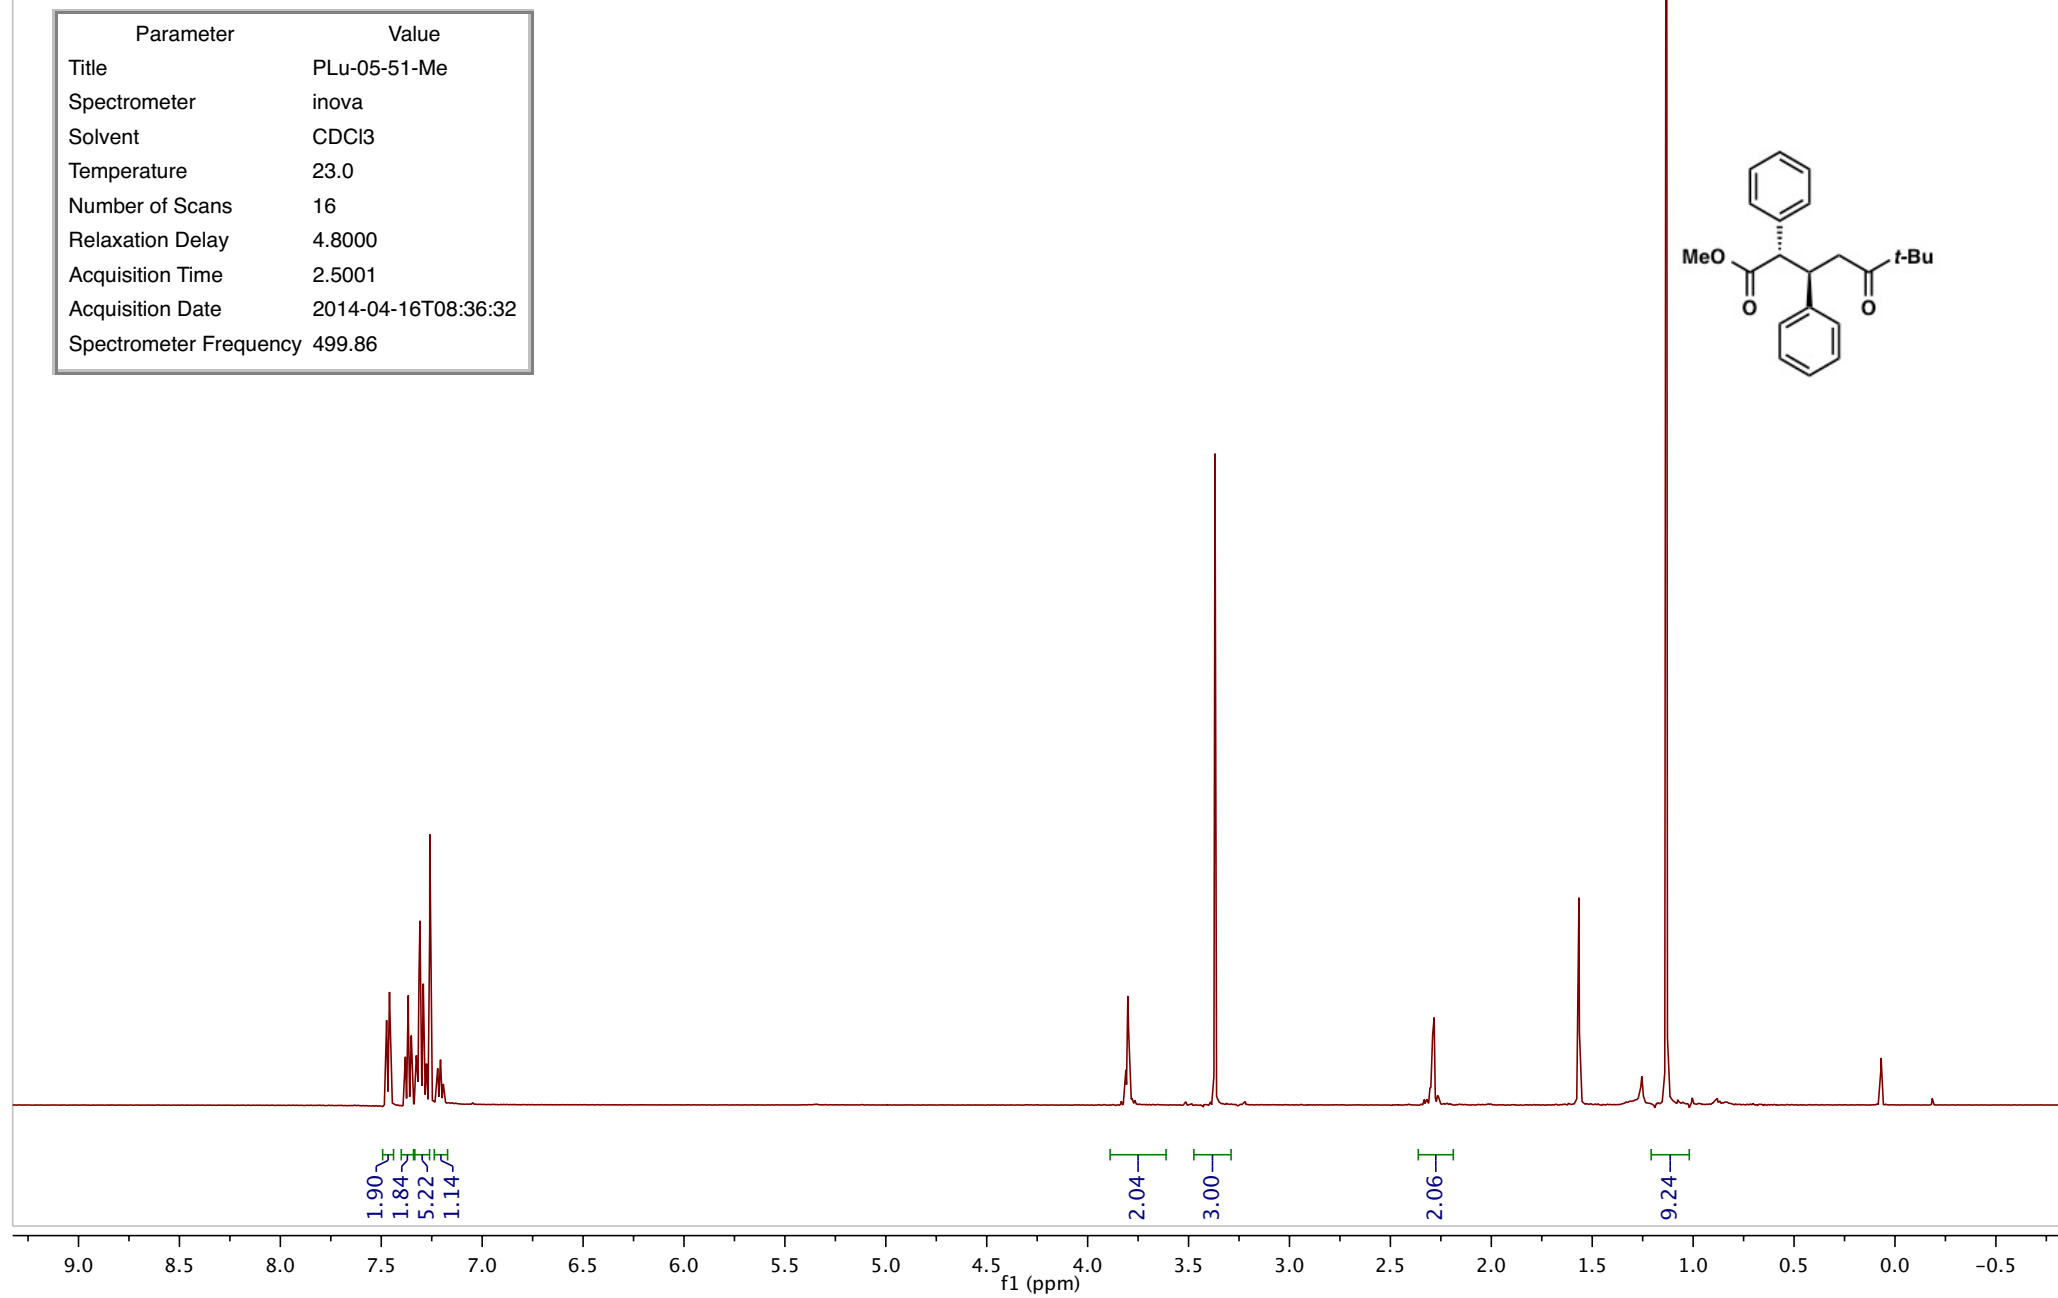

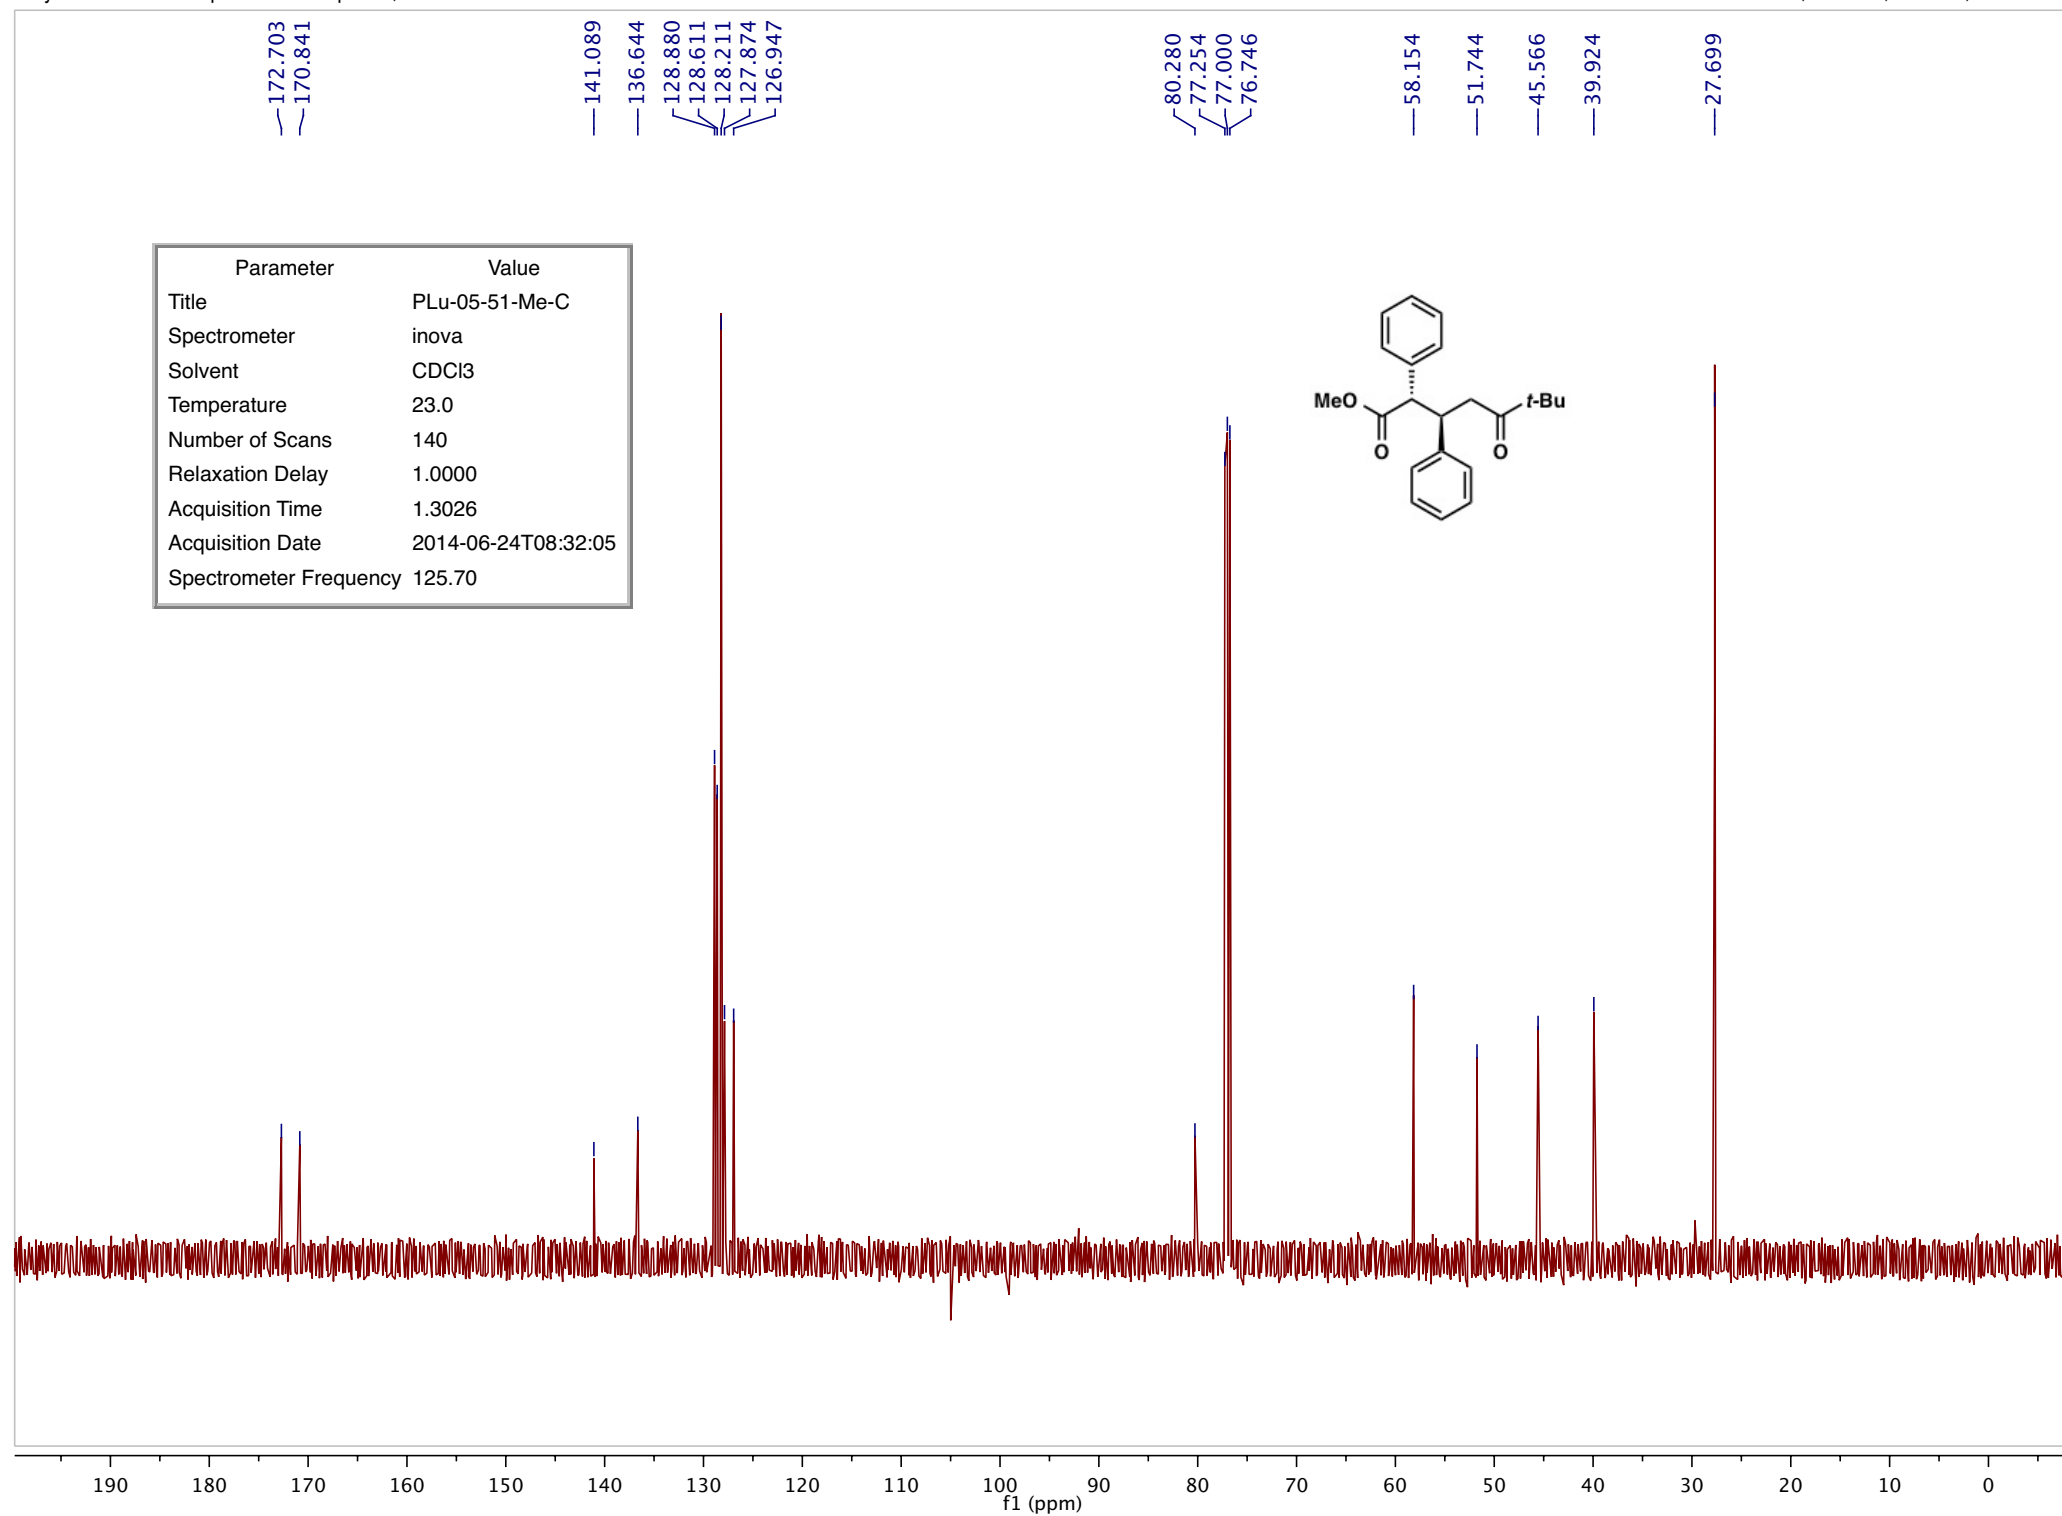

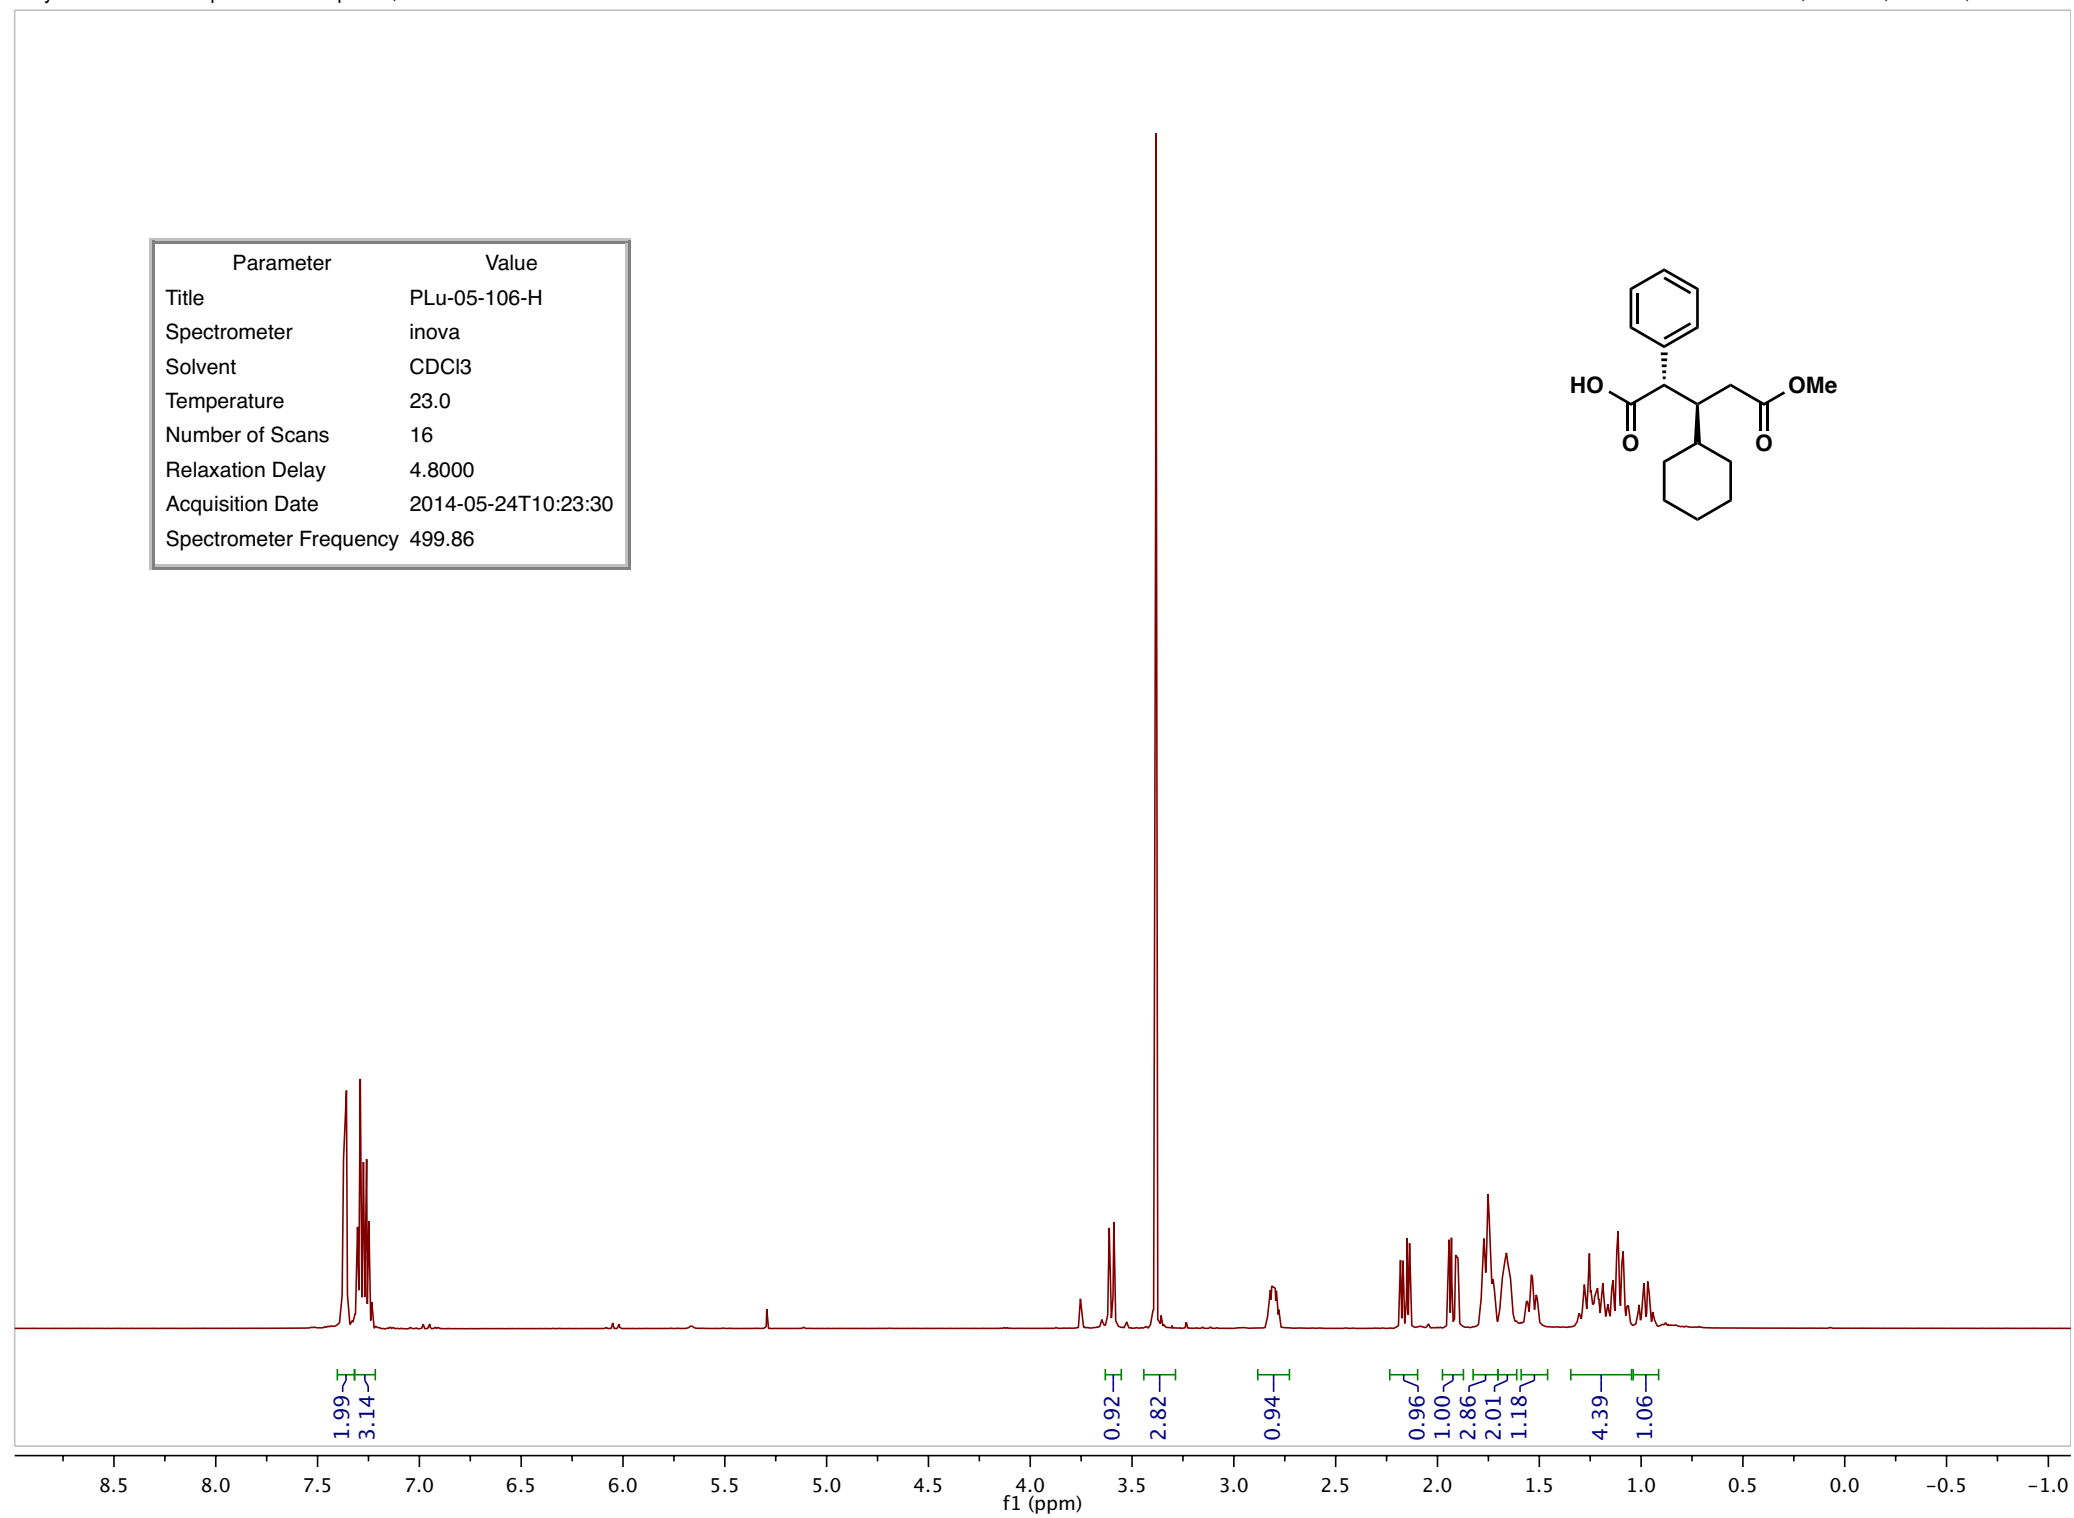

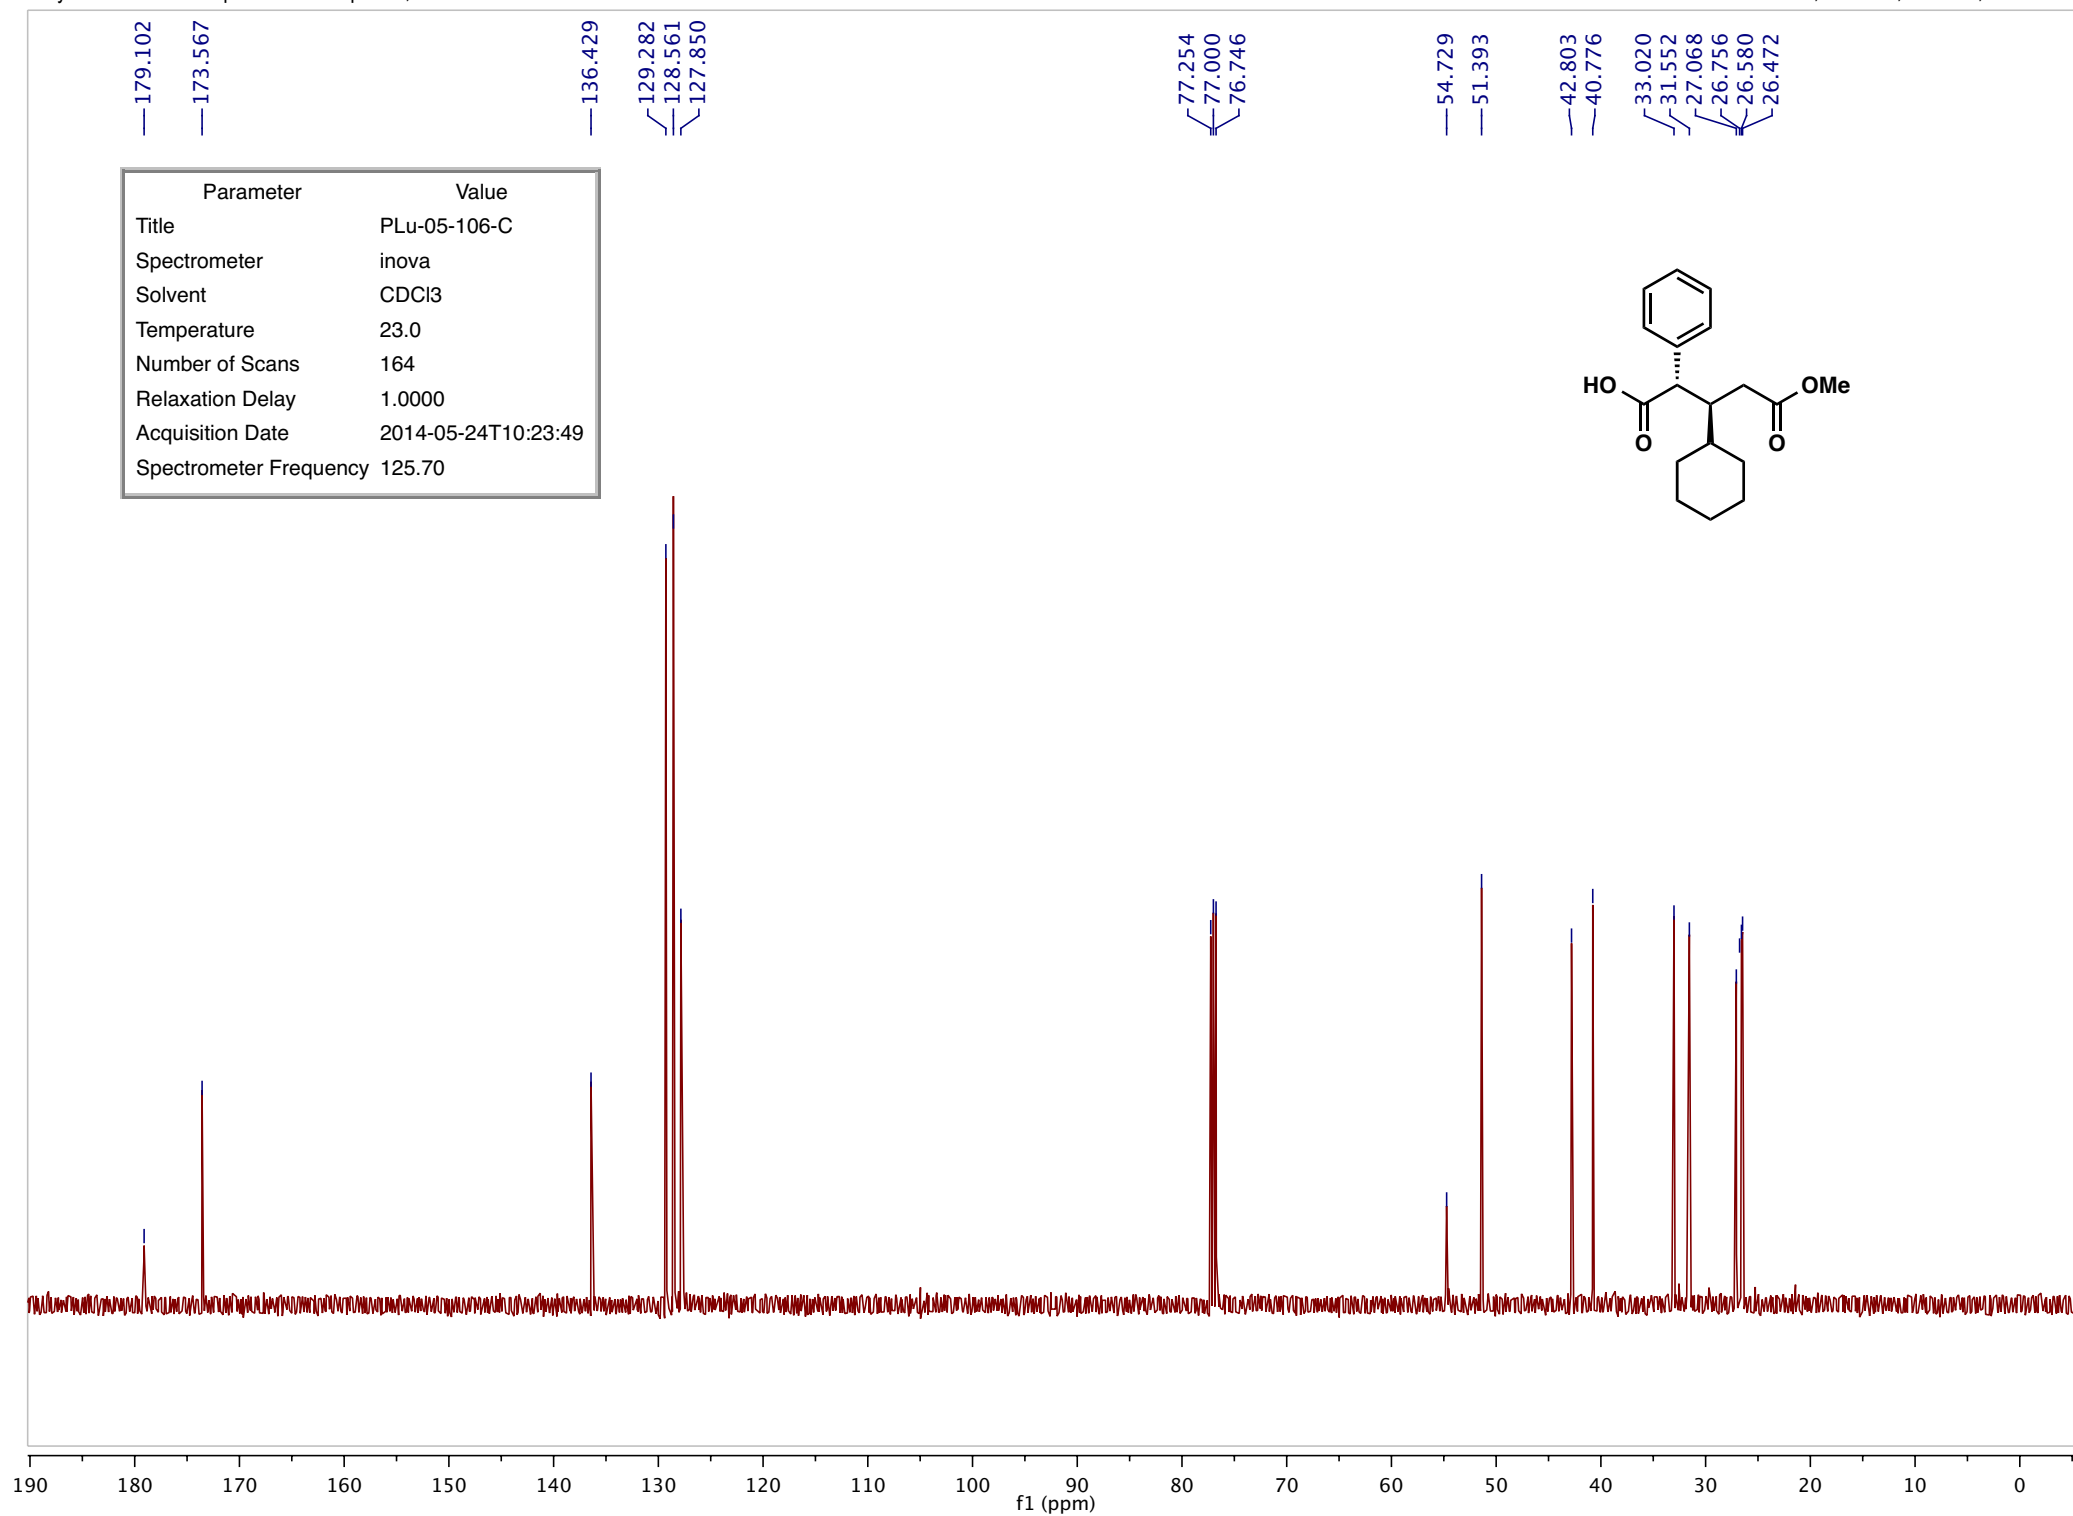

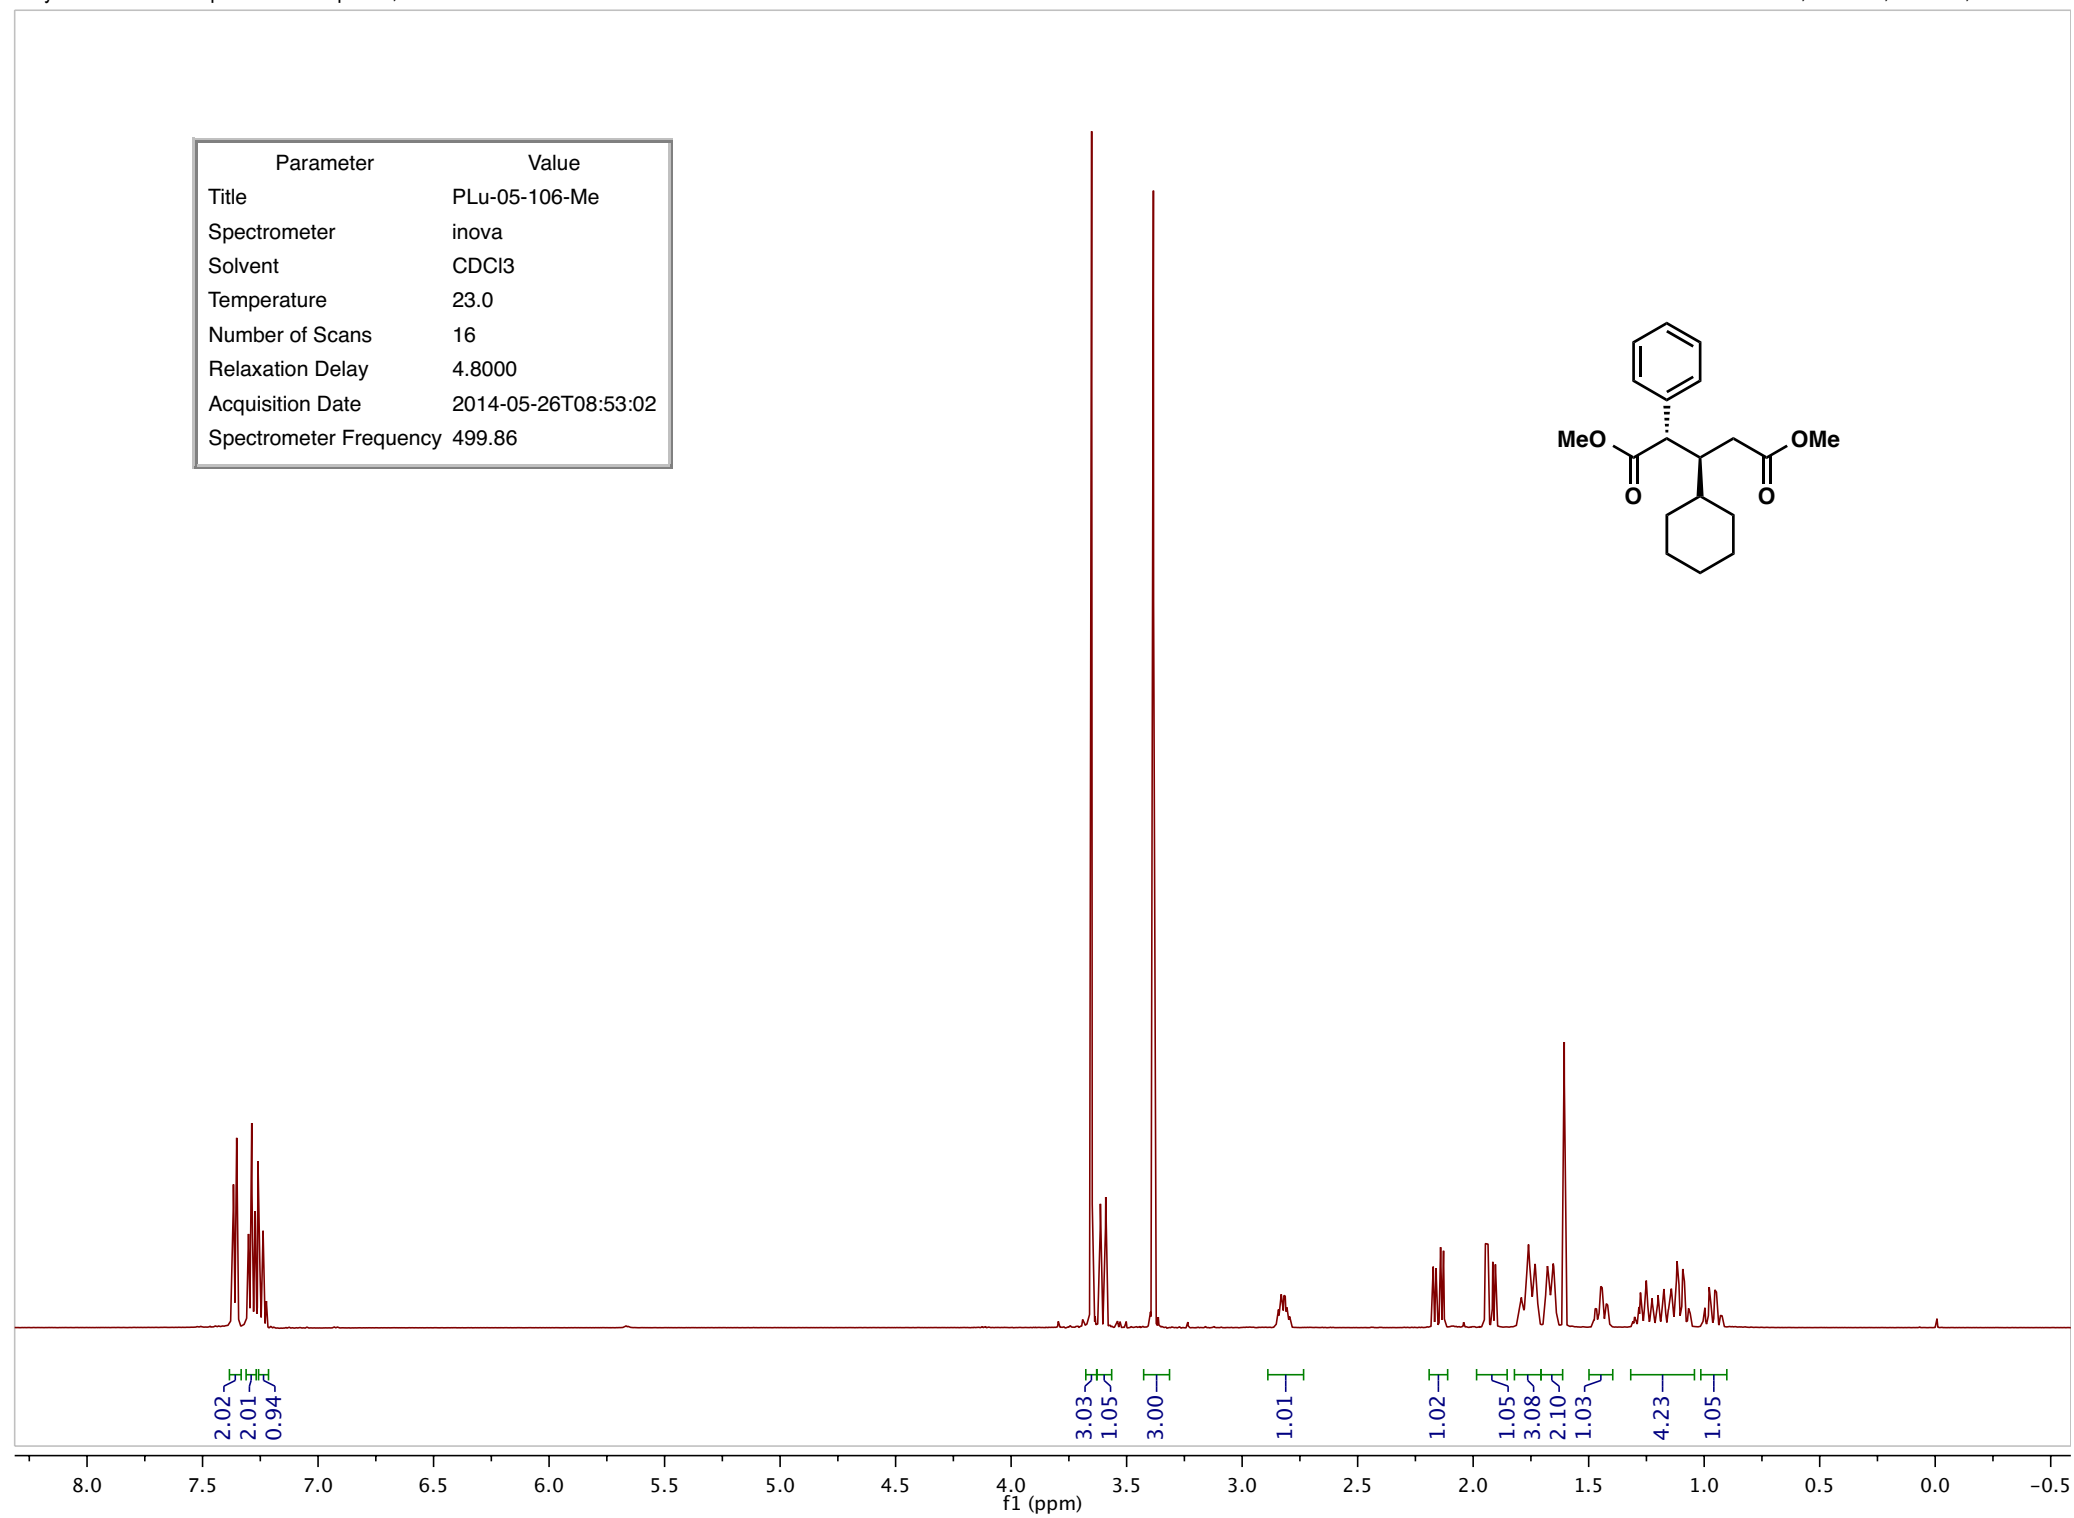



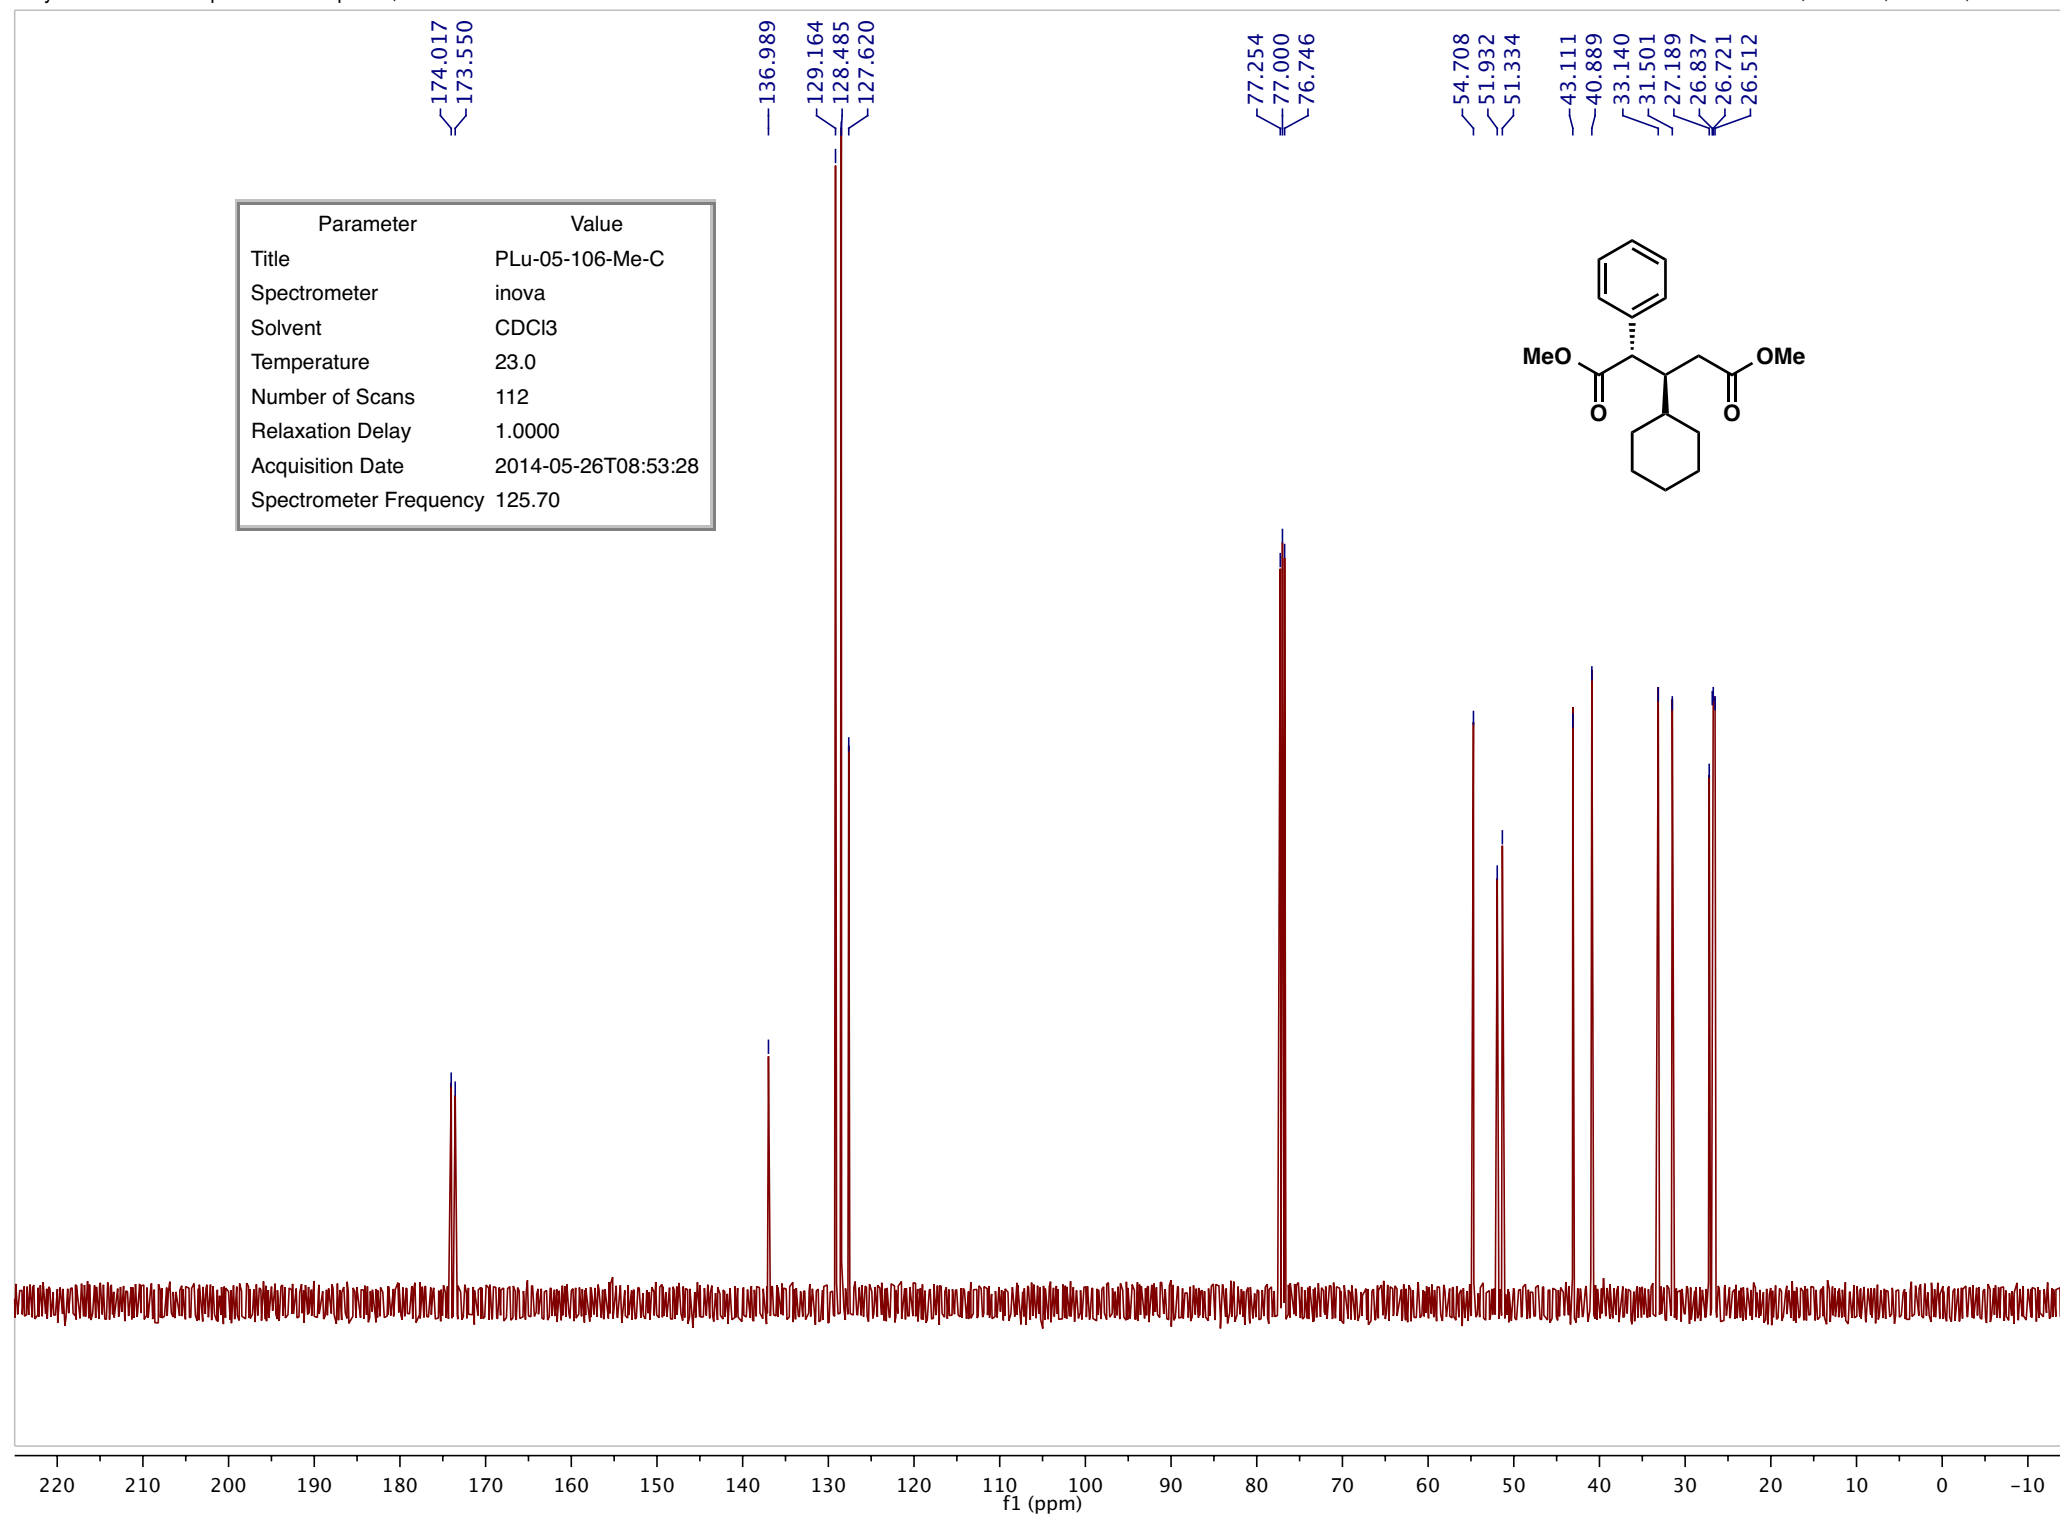

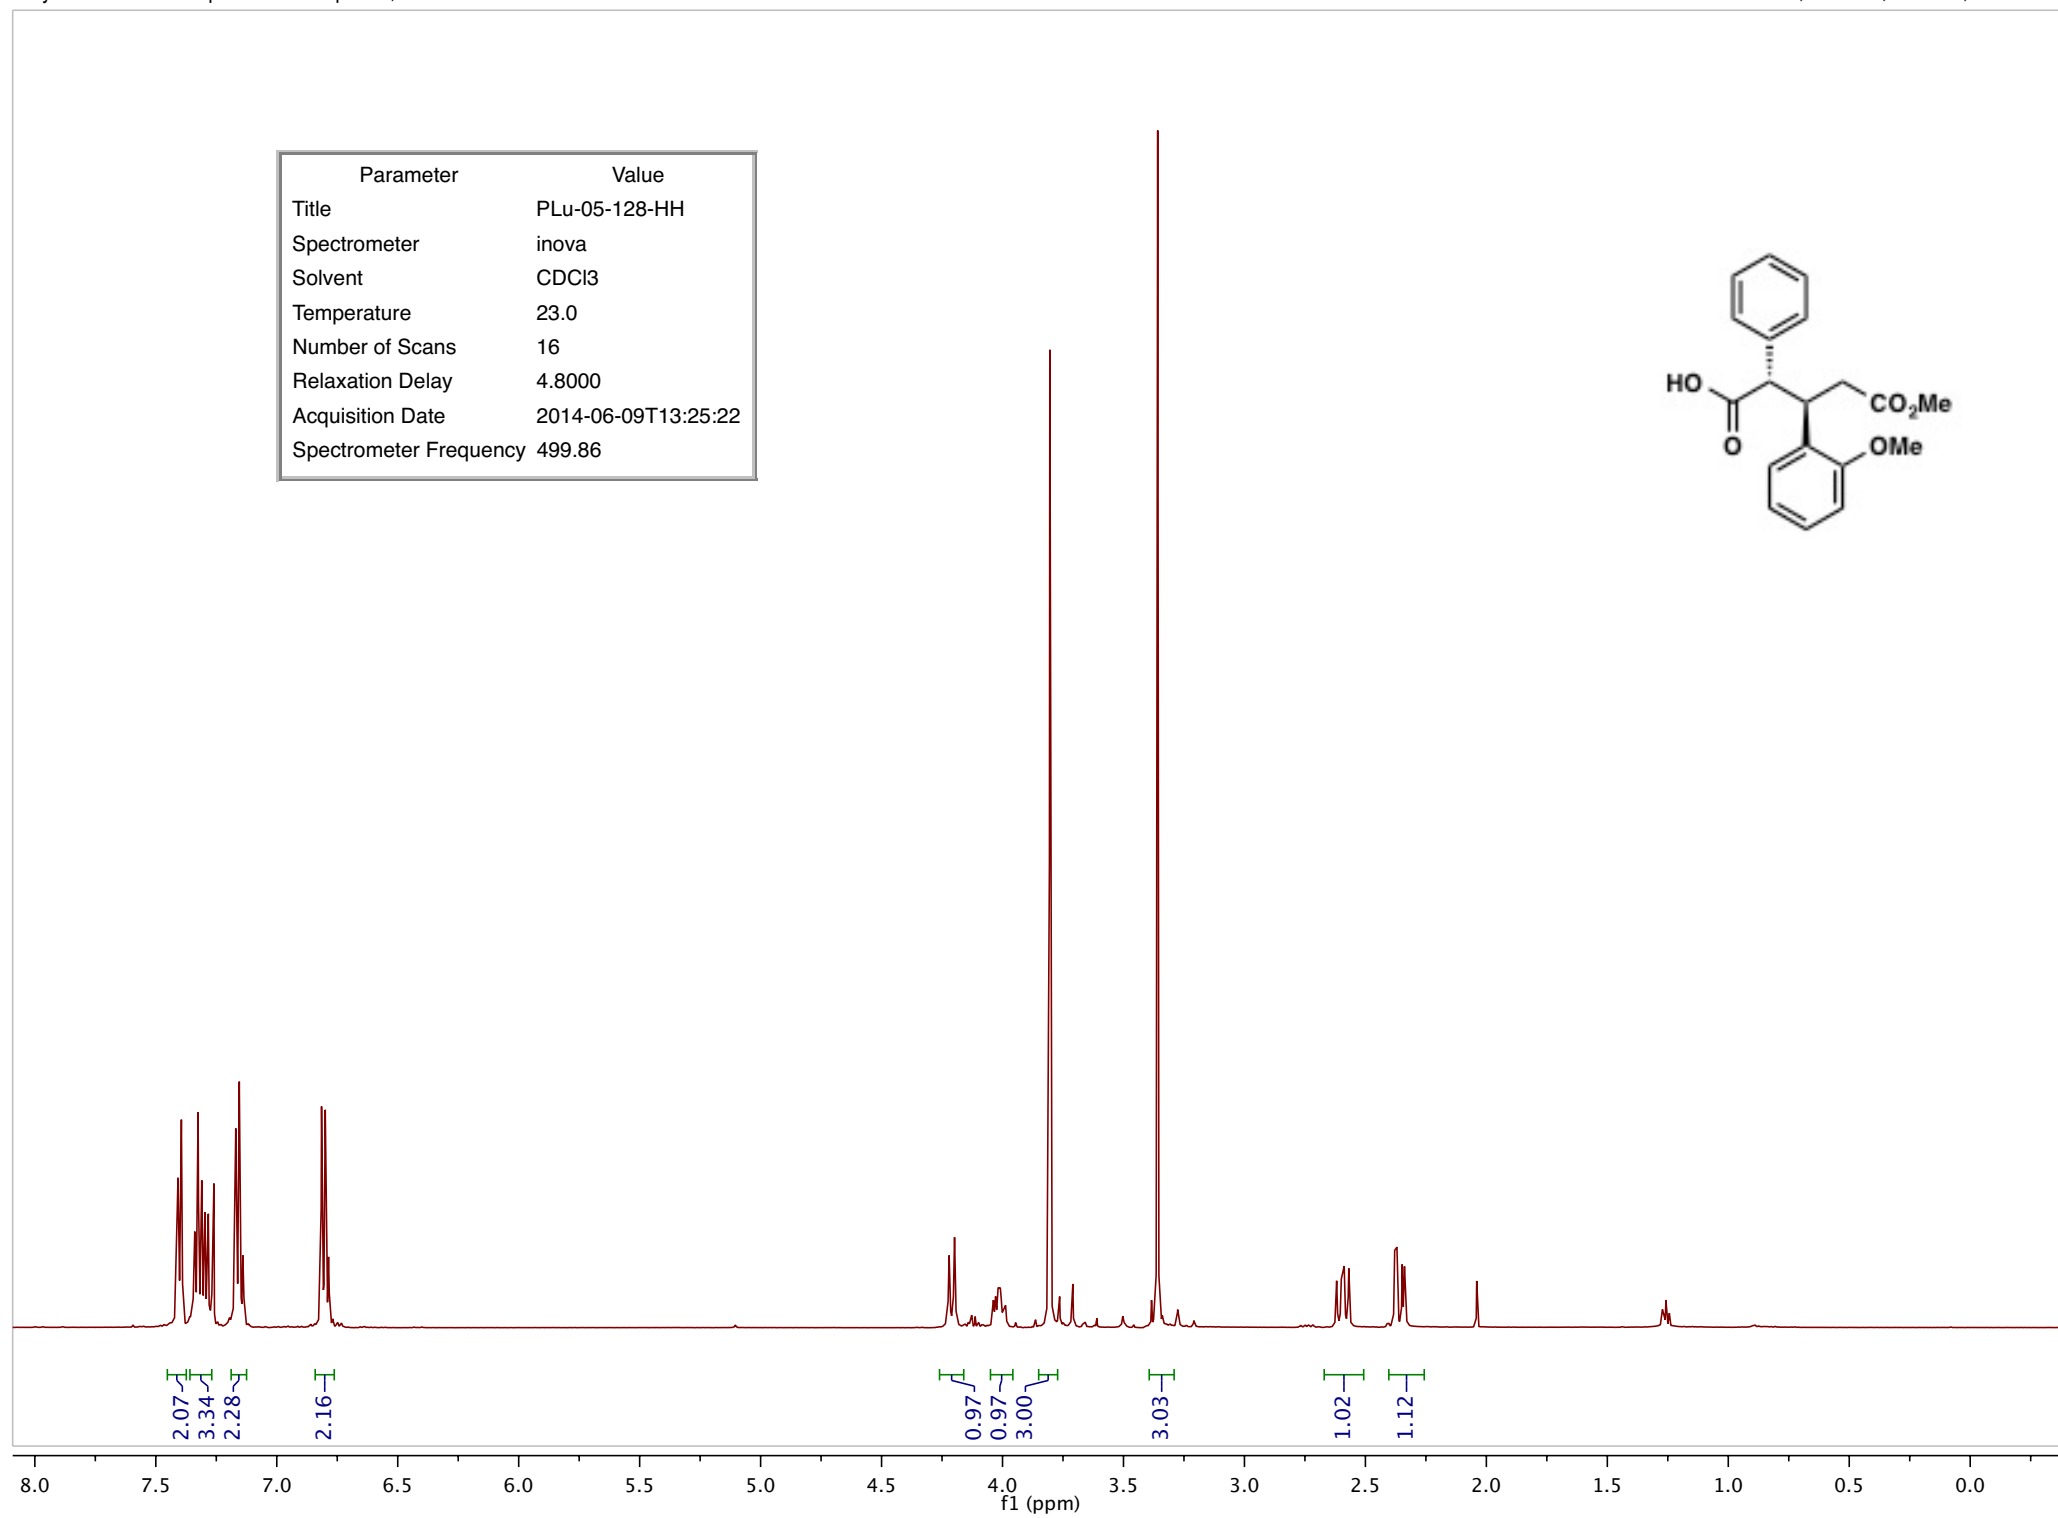

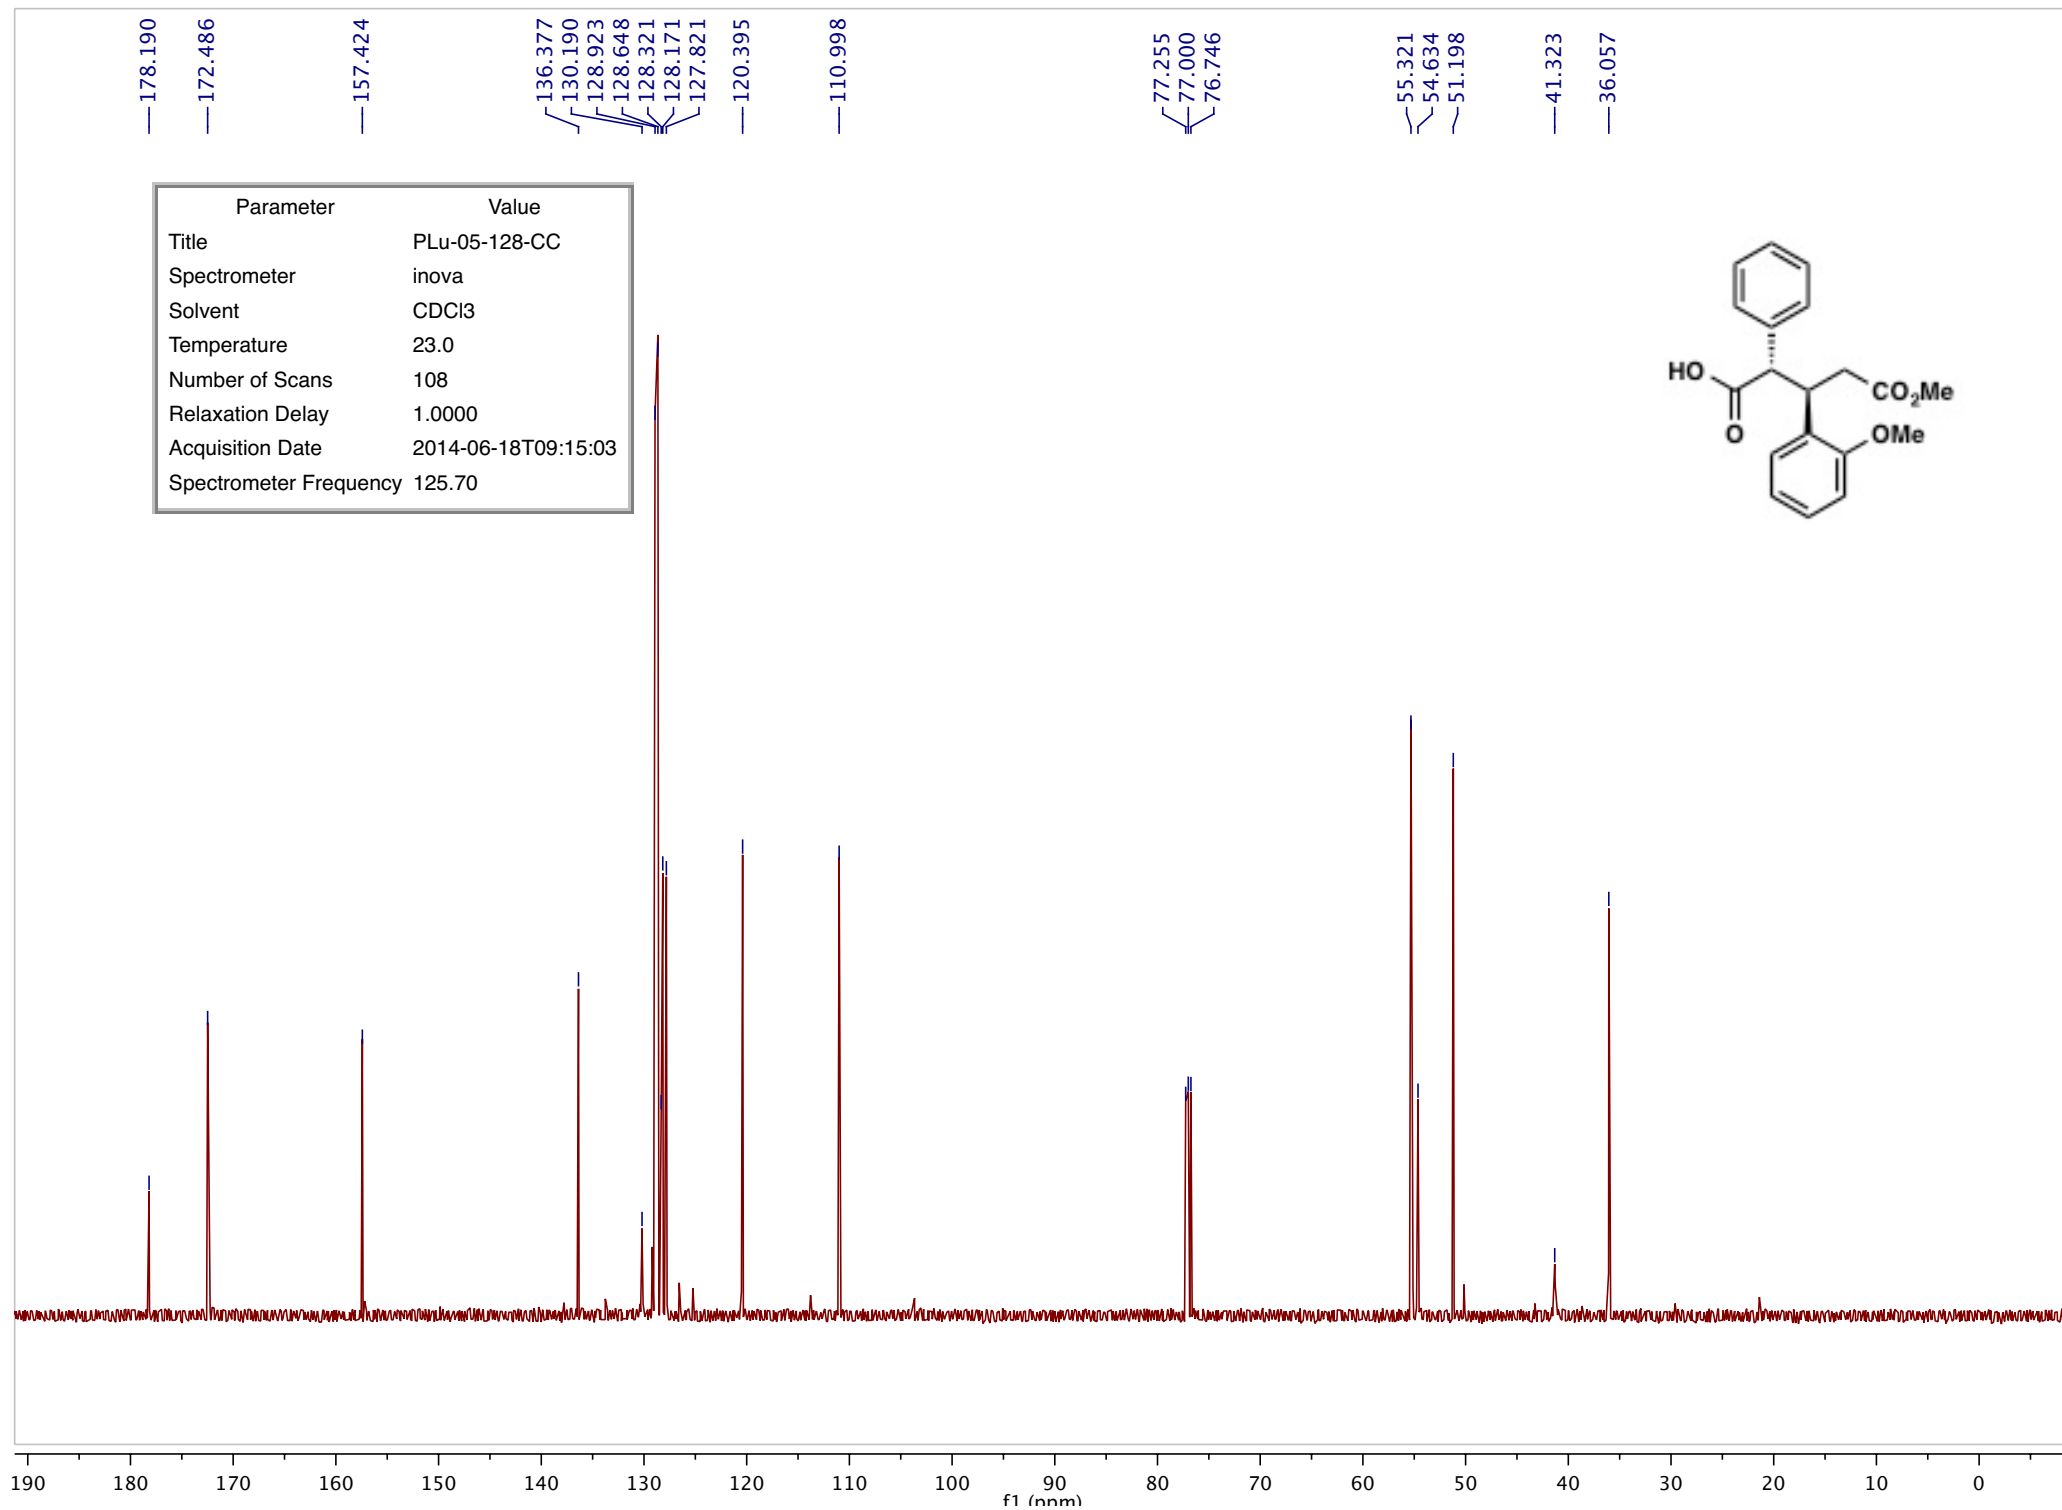

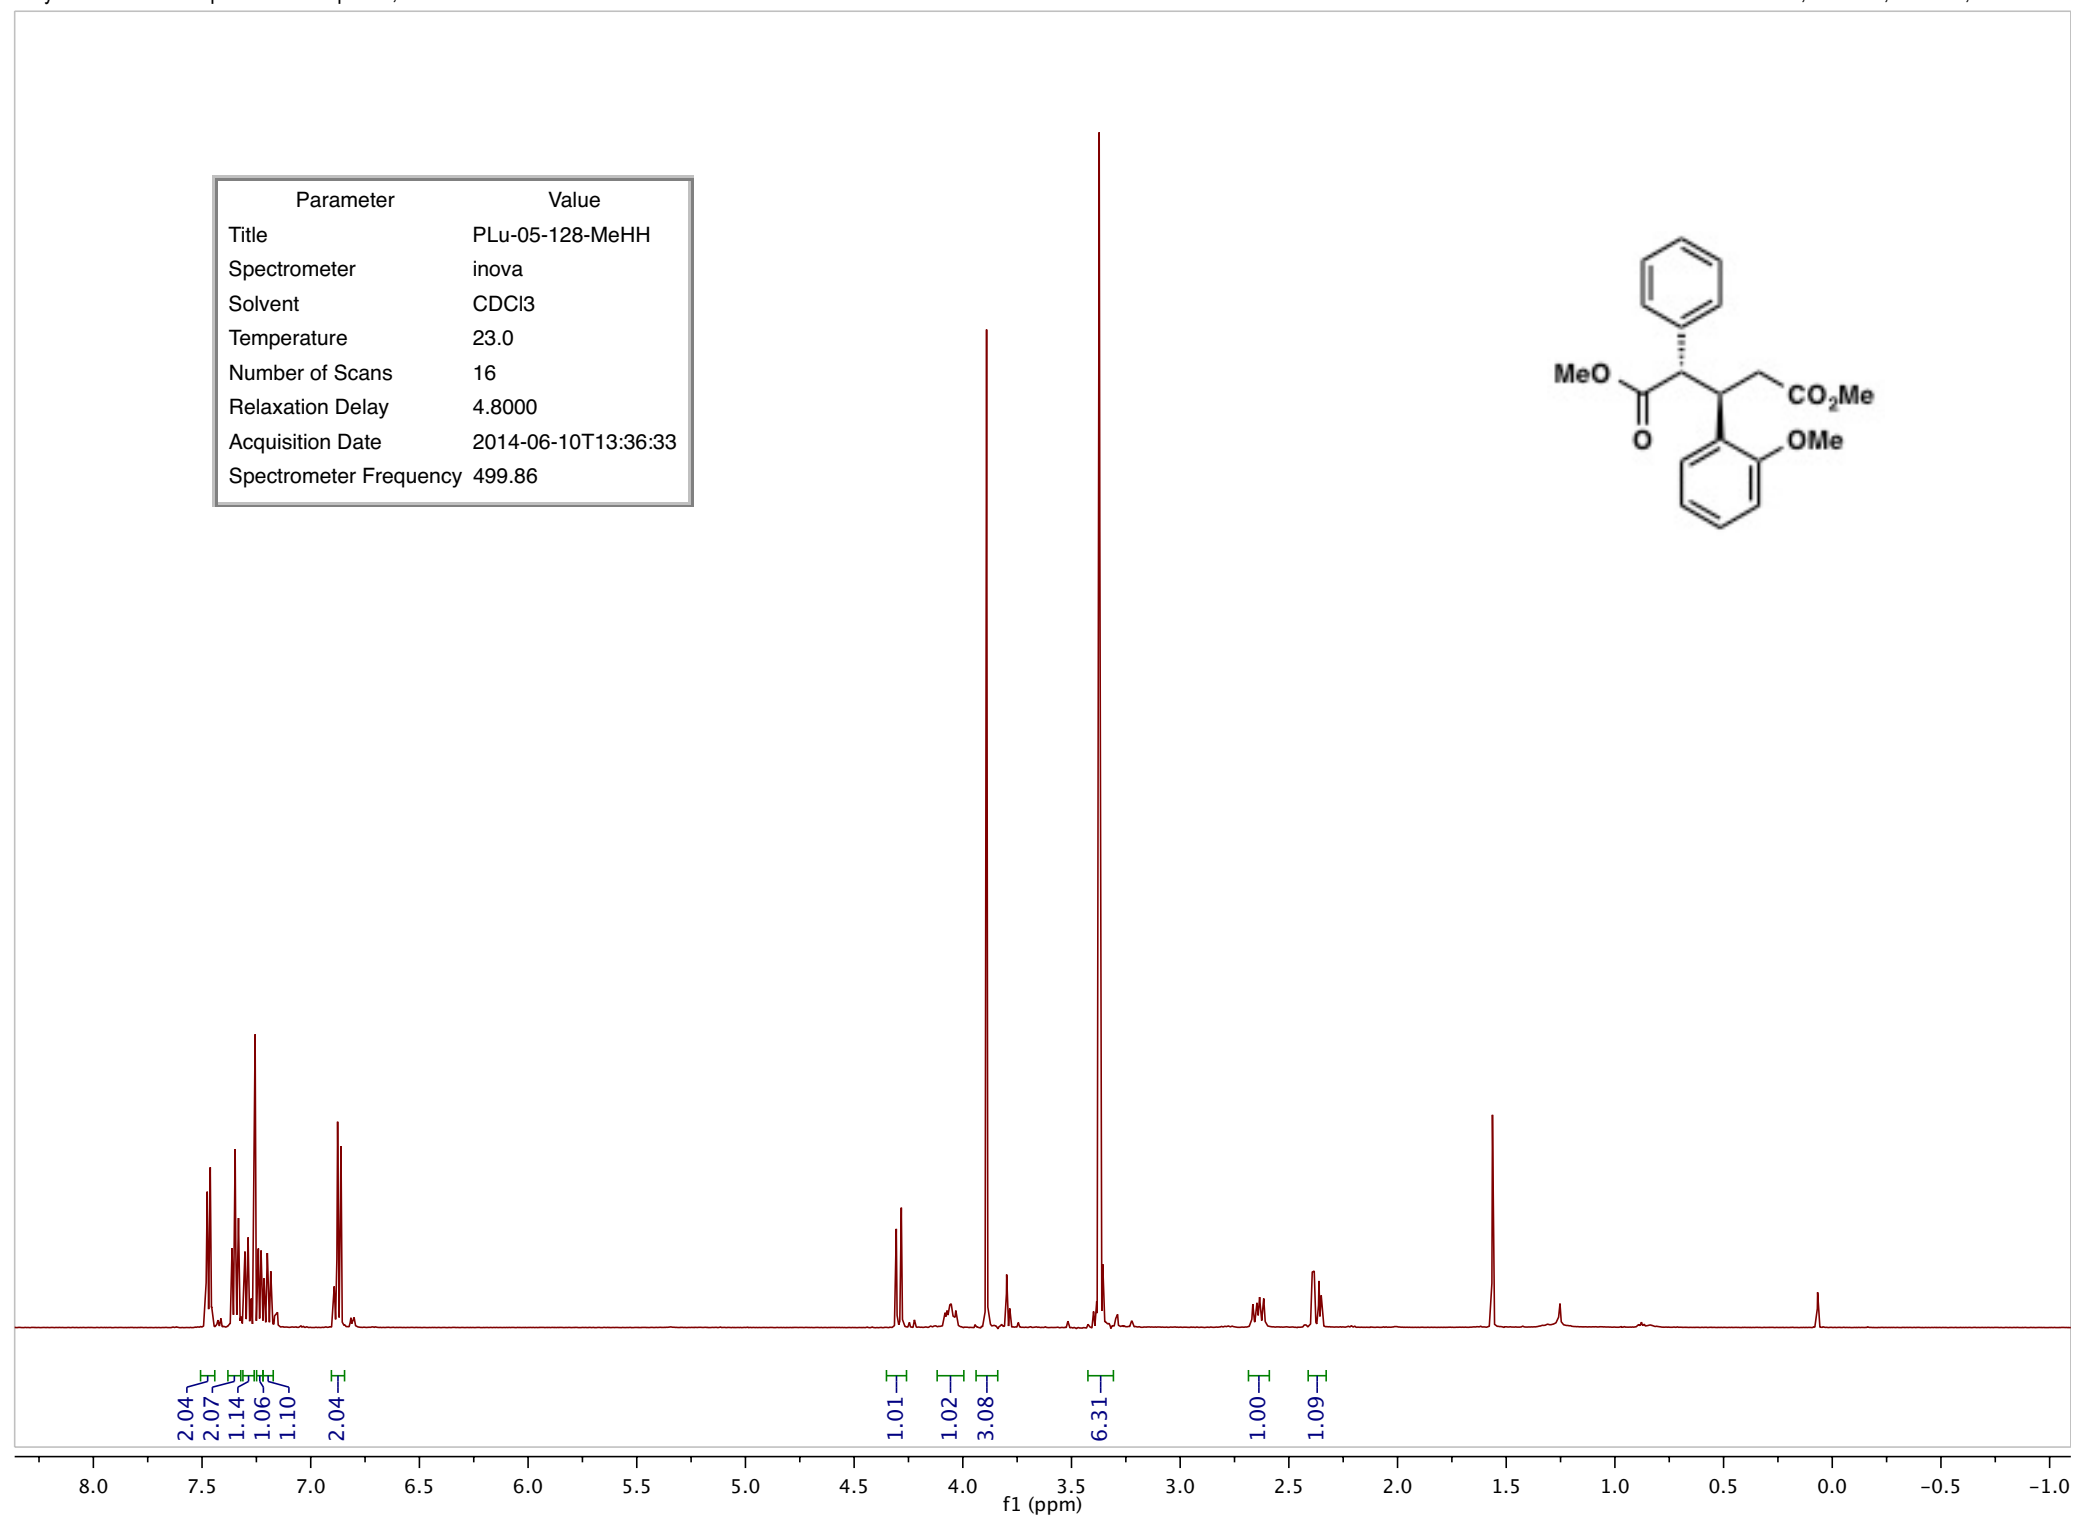

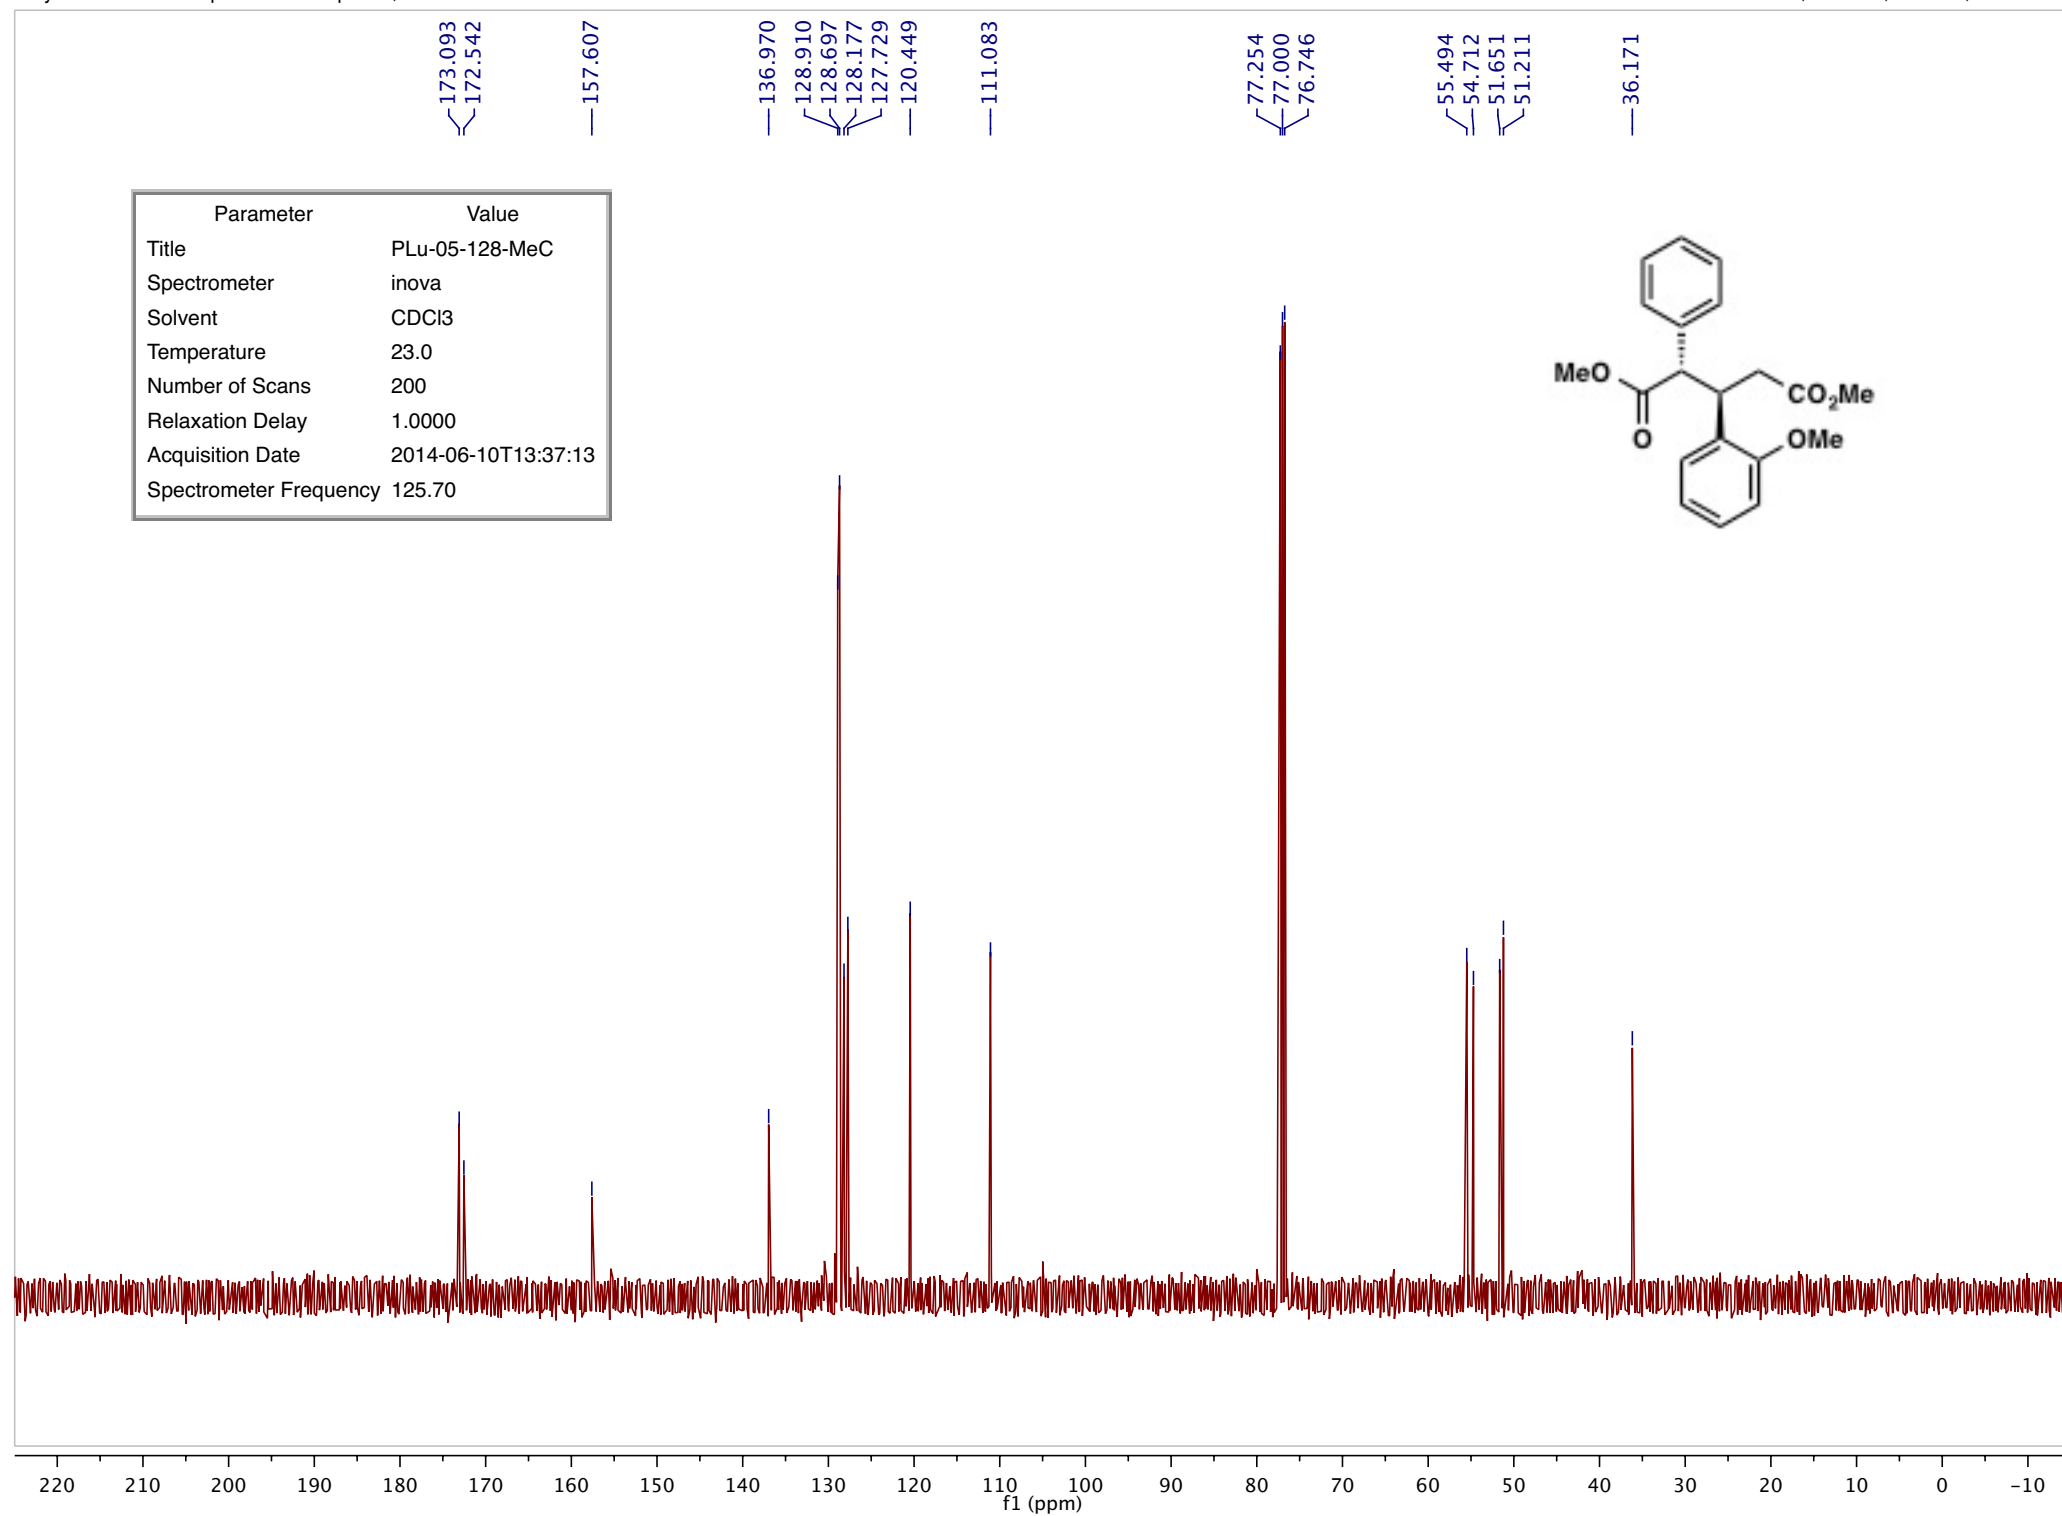

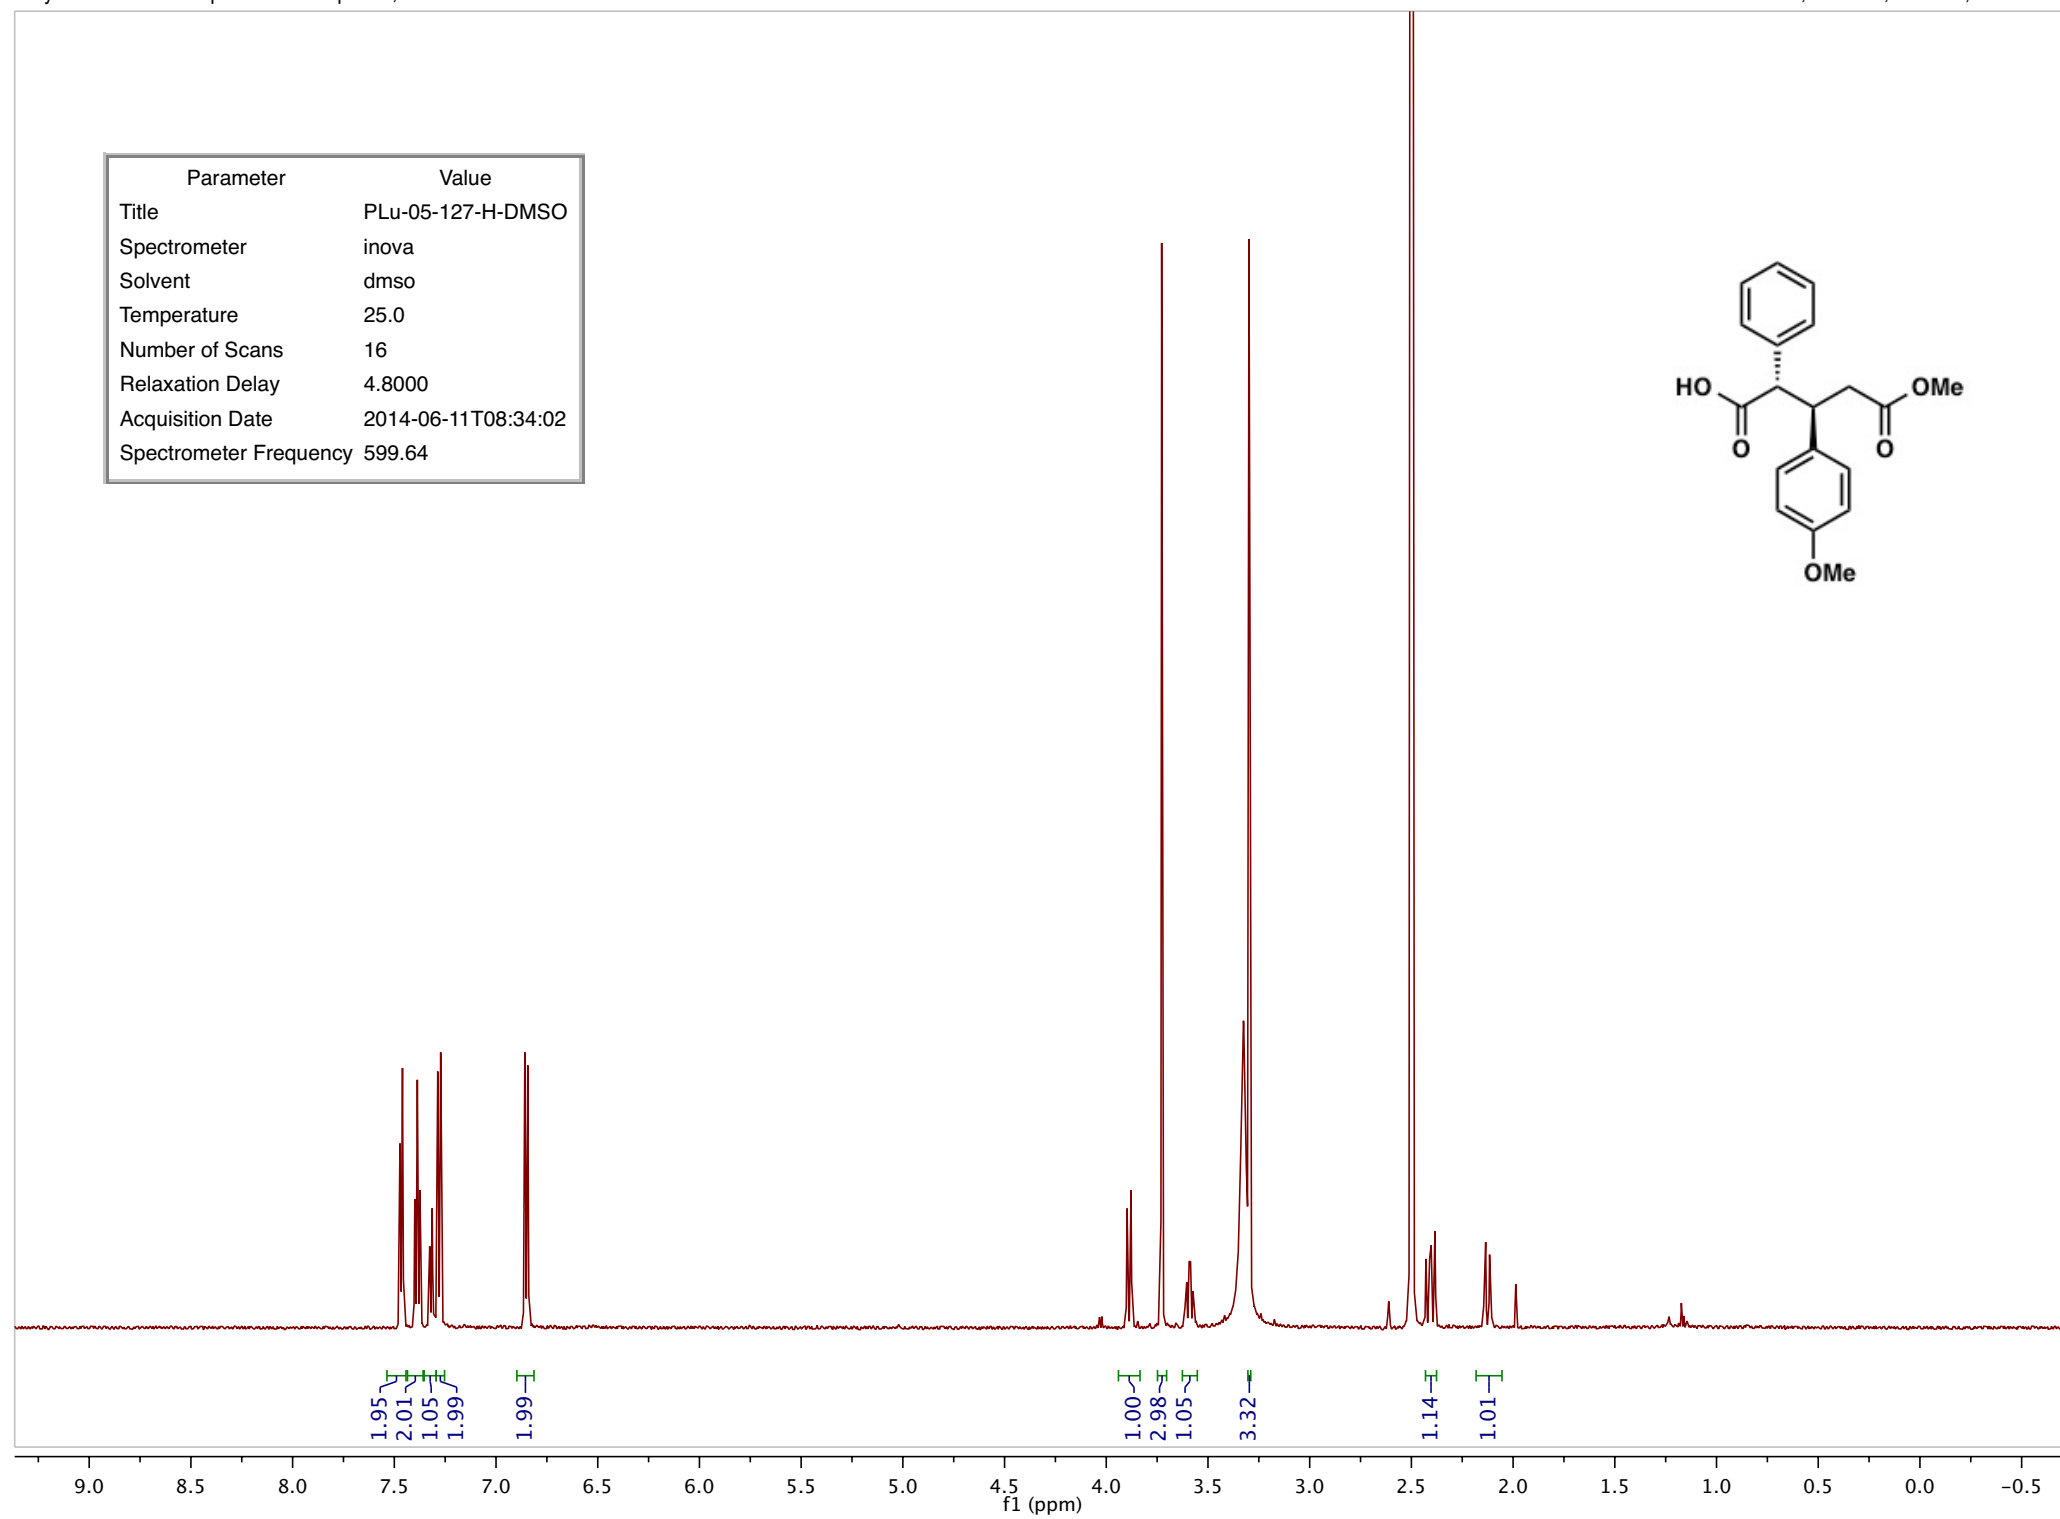

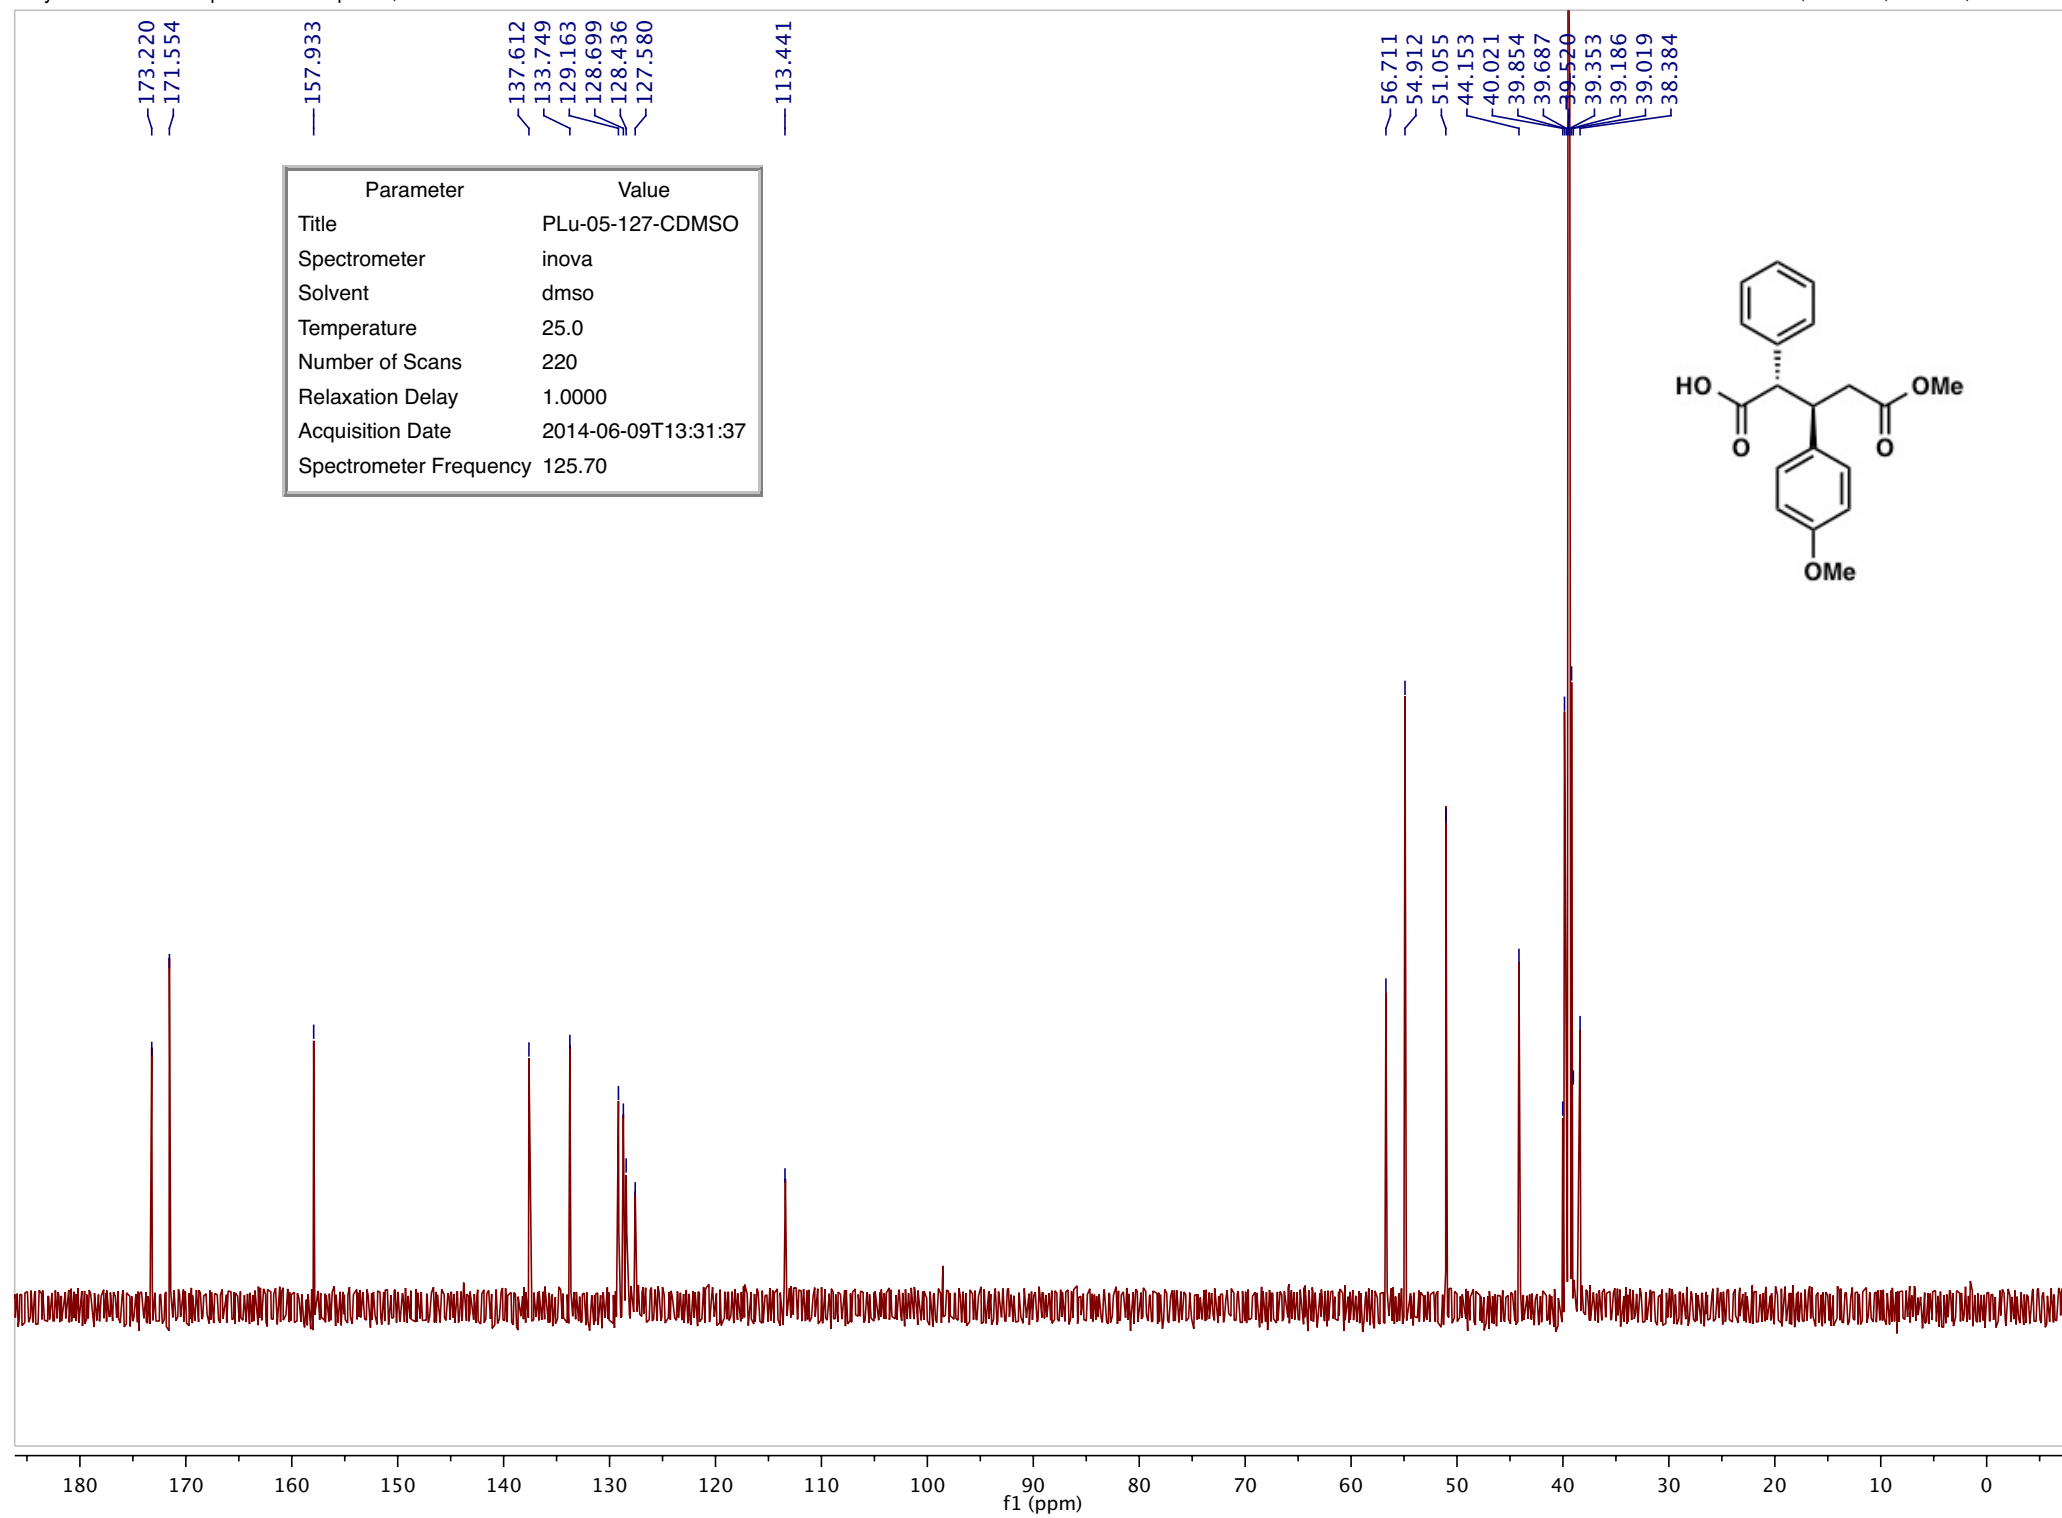

| Parameter              | Value               |
|------------------------|---------------------|
| Title                  | PLu-05-127-MeH      |
| Spectrometer           | inova               |
| Solvent                | CDCl <sub>3</sub>   |
| Temperature            | 23.0                |
| Number of Scans        | 16                  |
| Relaxation Delay       | 4.8000              |
| Acquisition Date       | 2014-06-10T09:18:57 |
| Spectrometer Frequency | 499.86              |

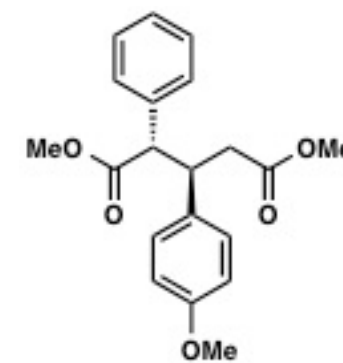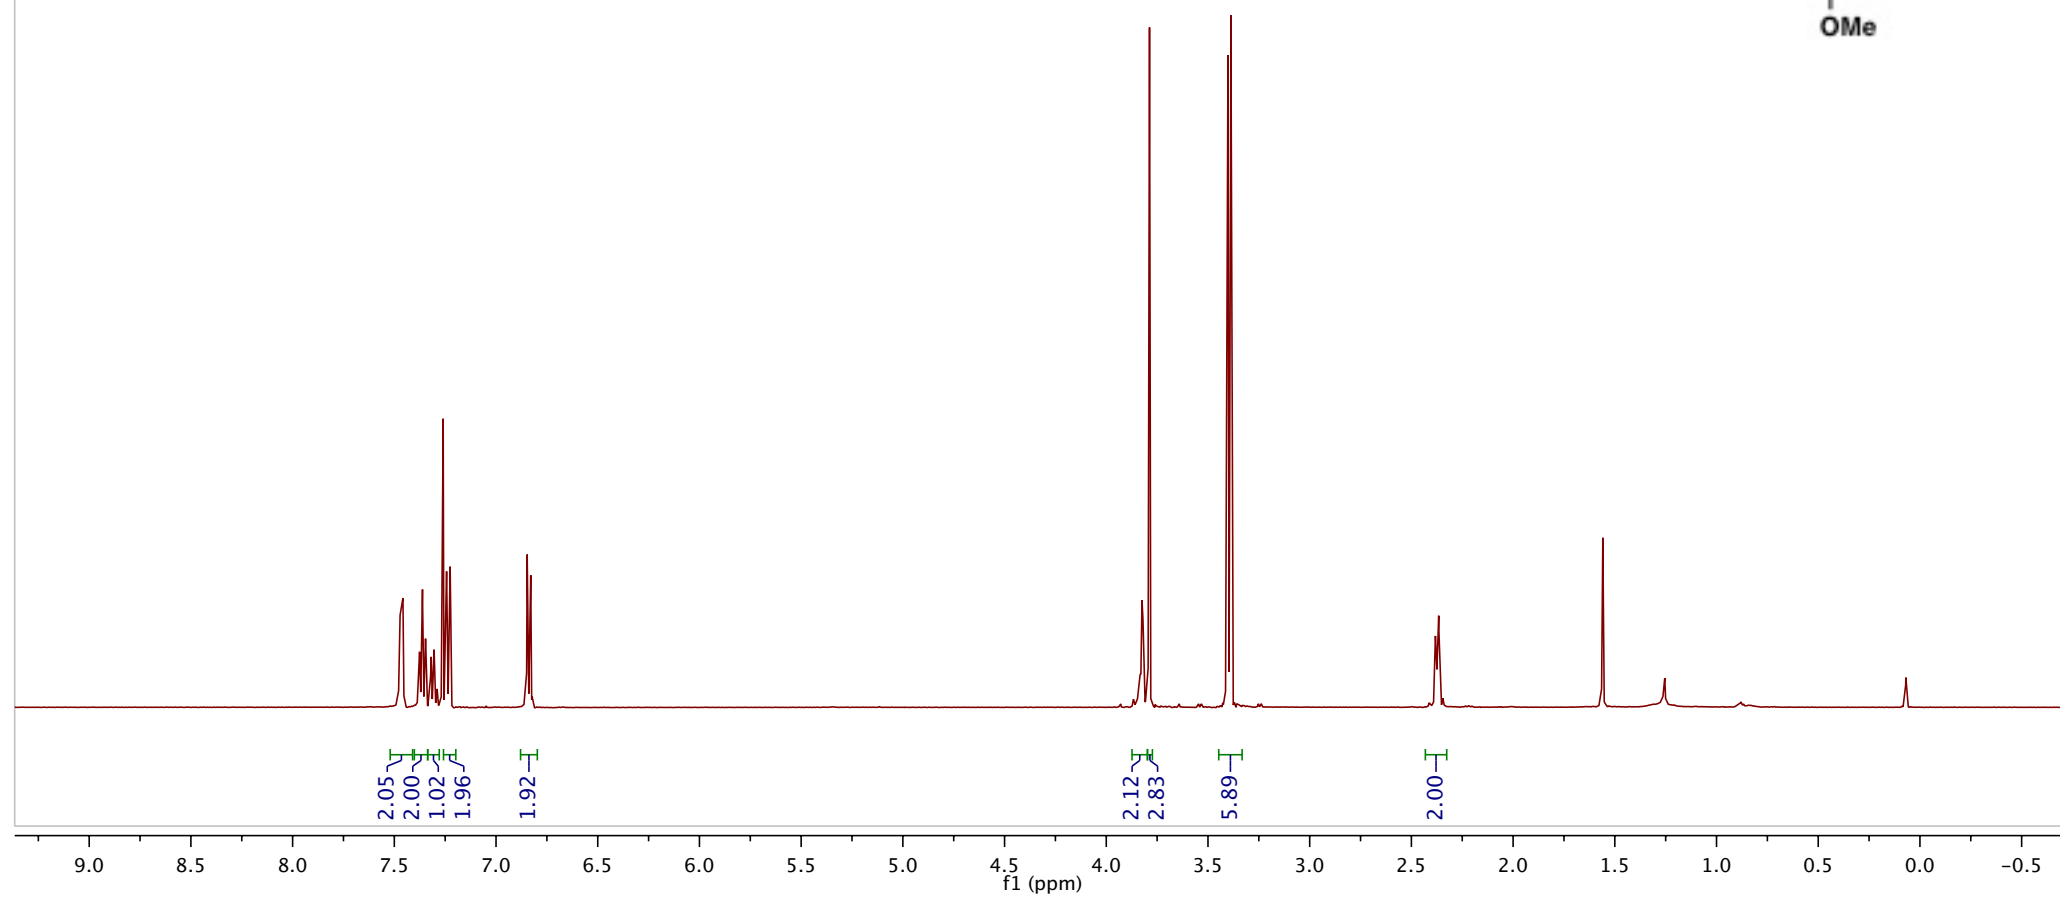



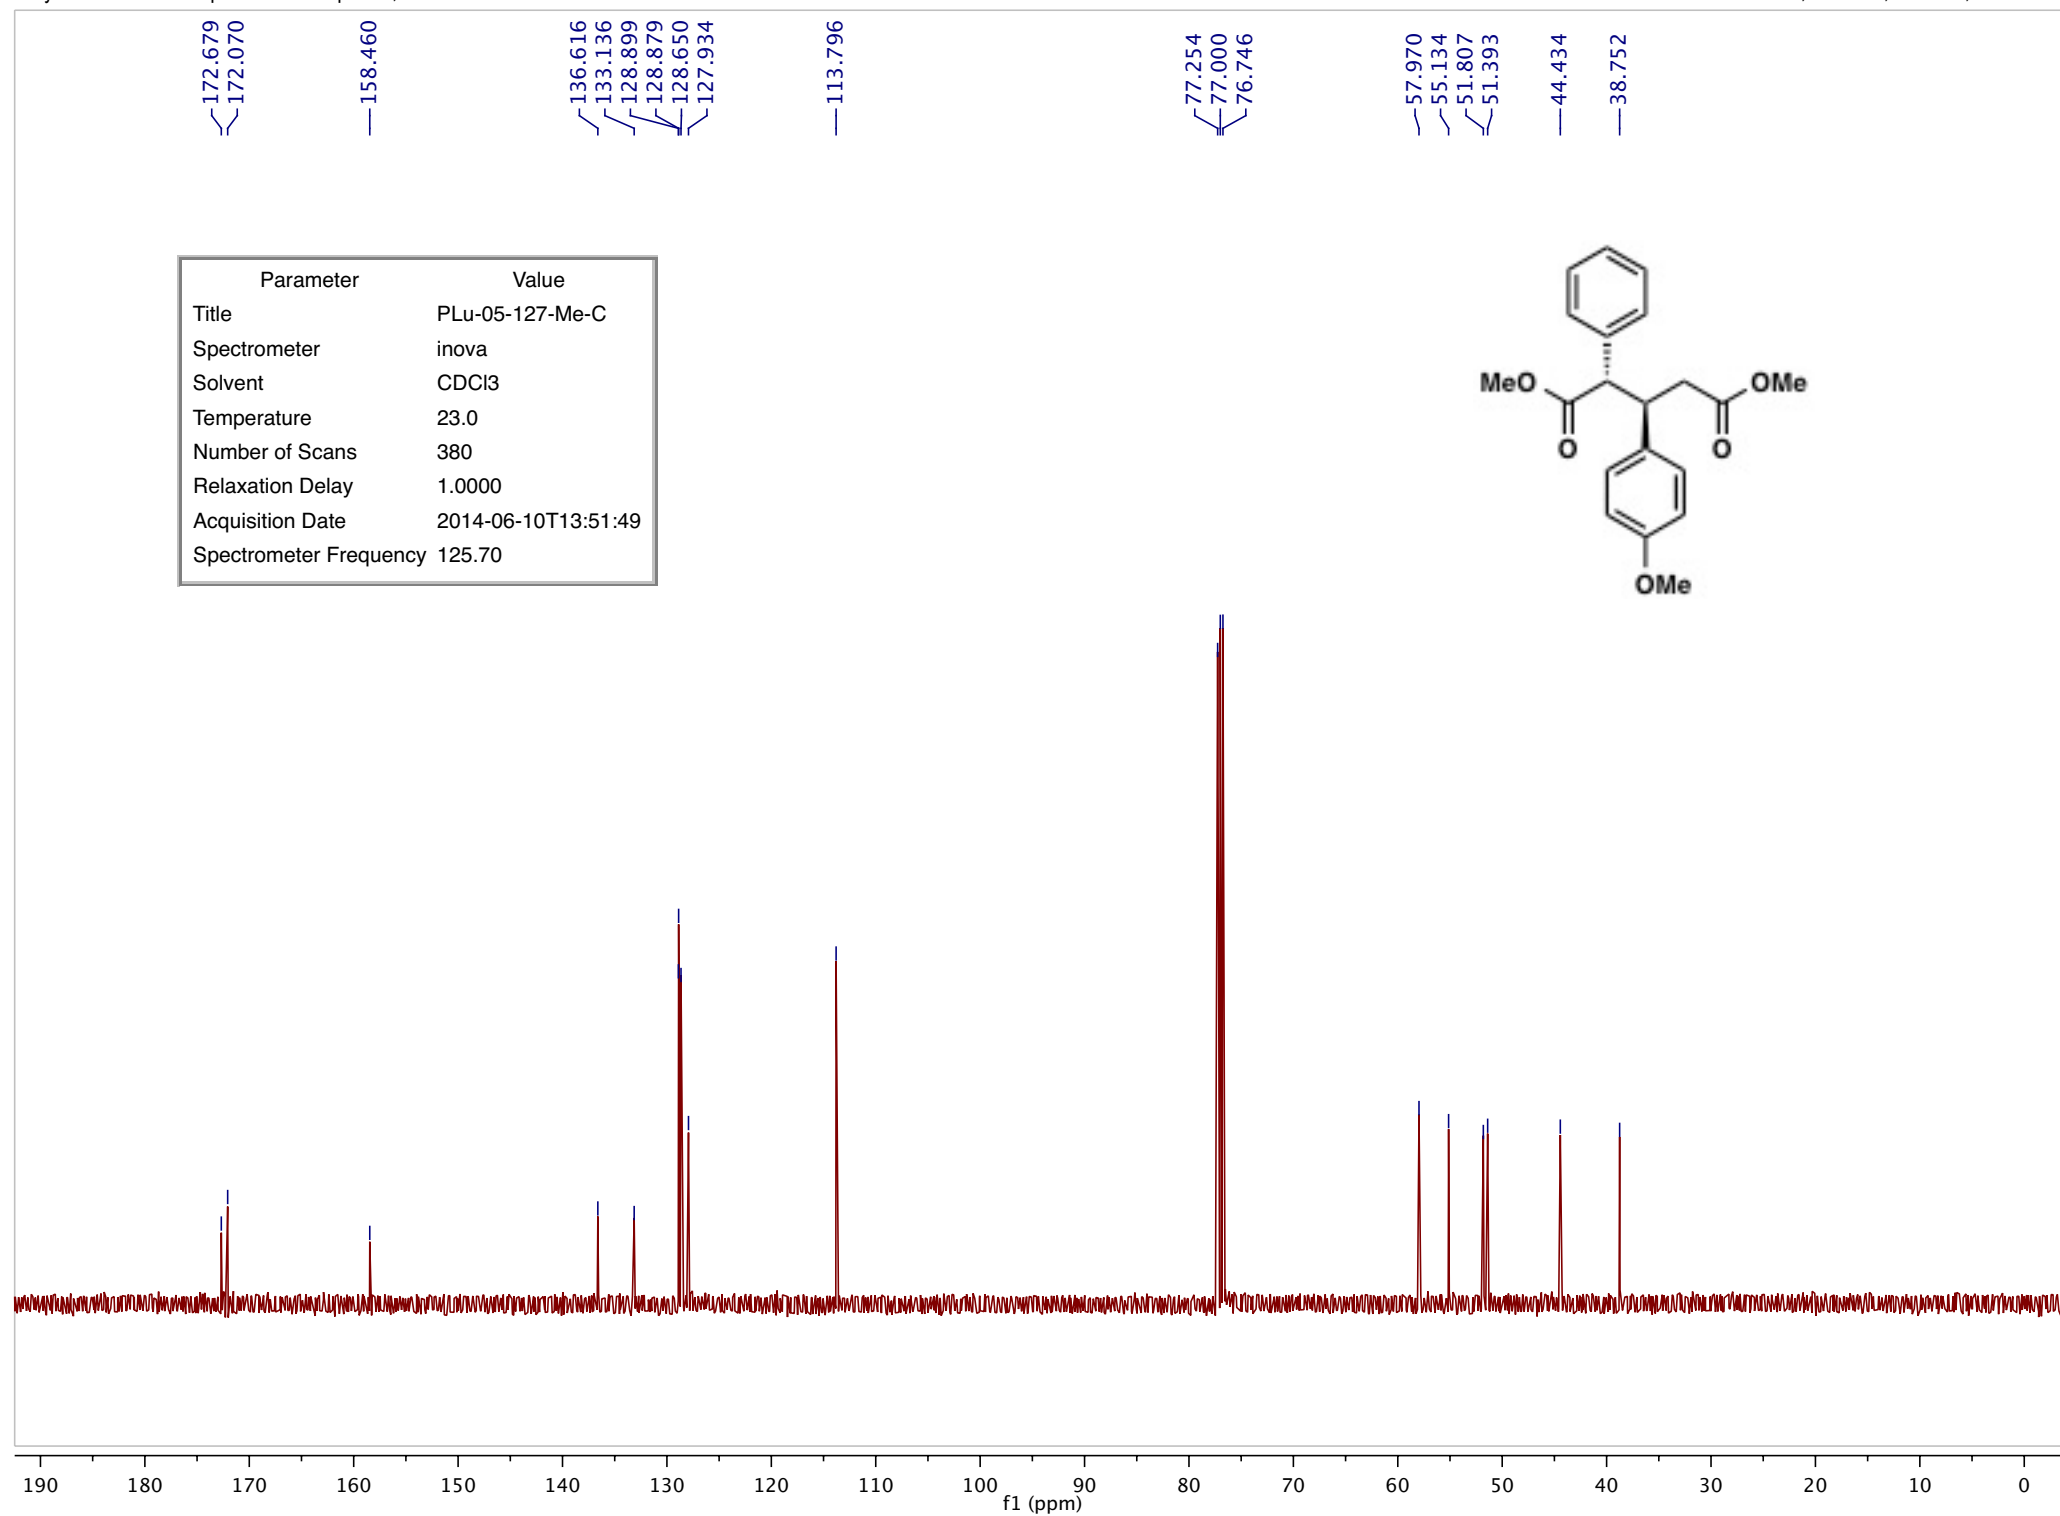

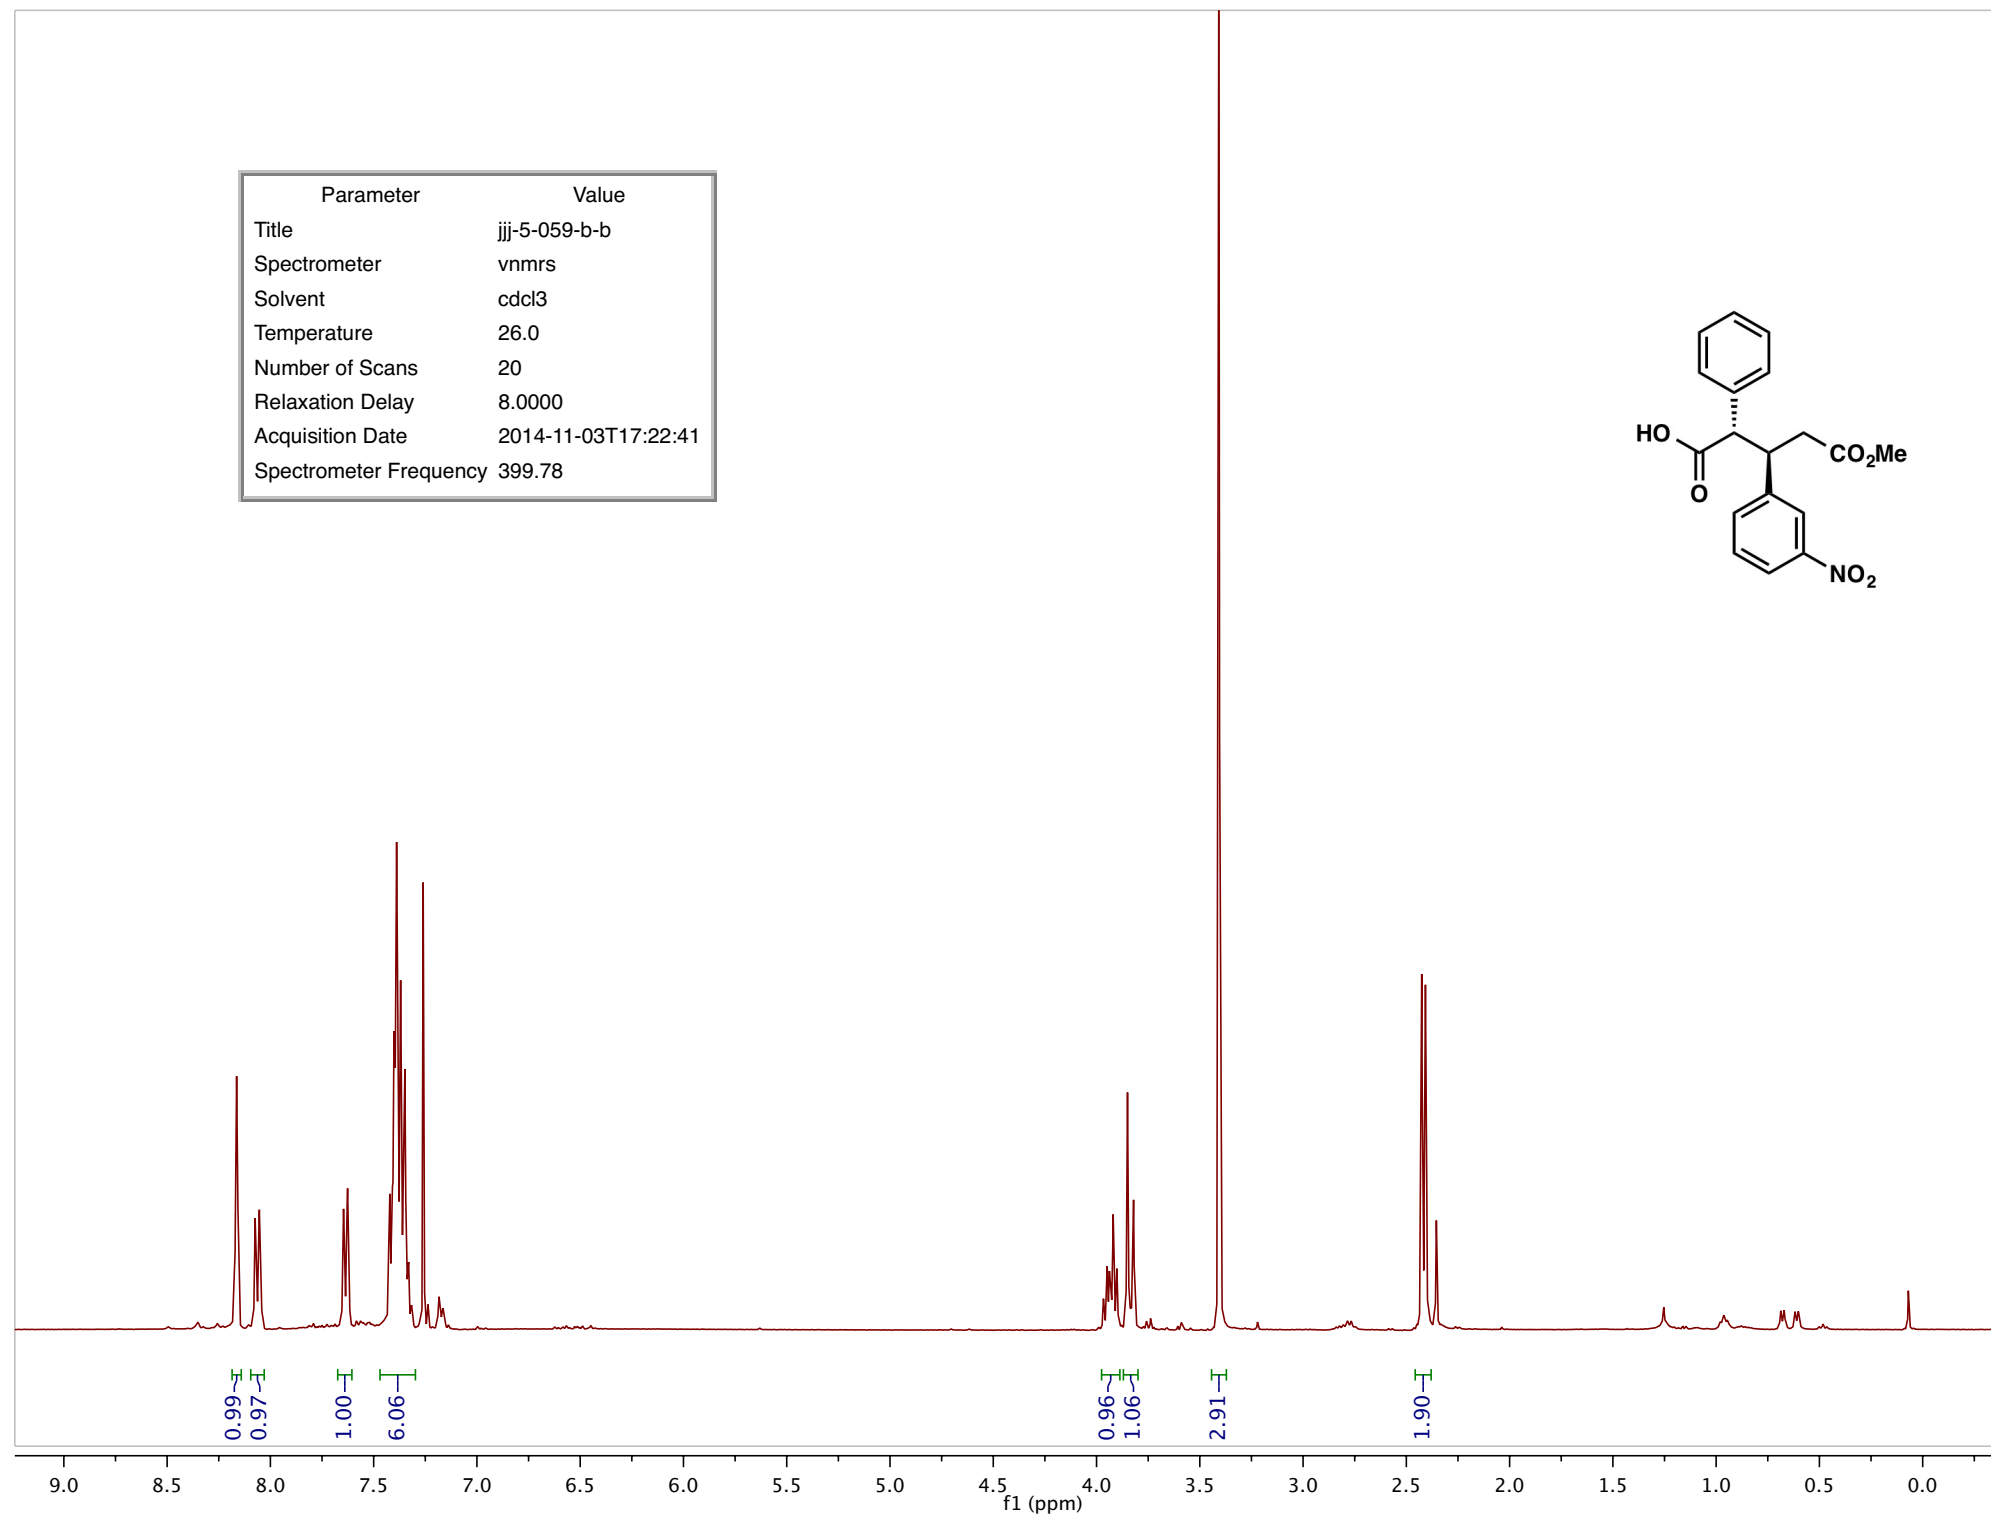

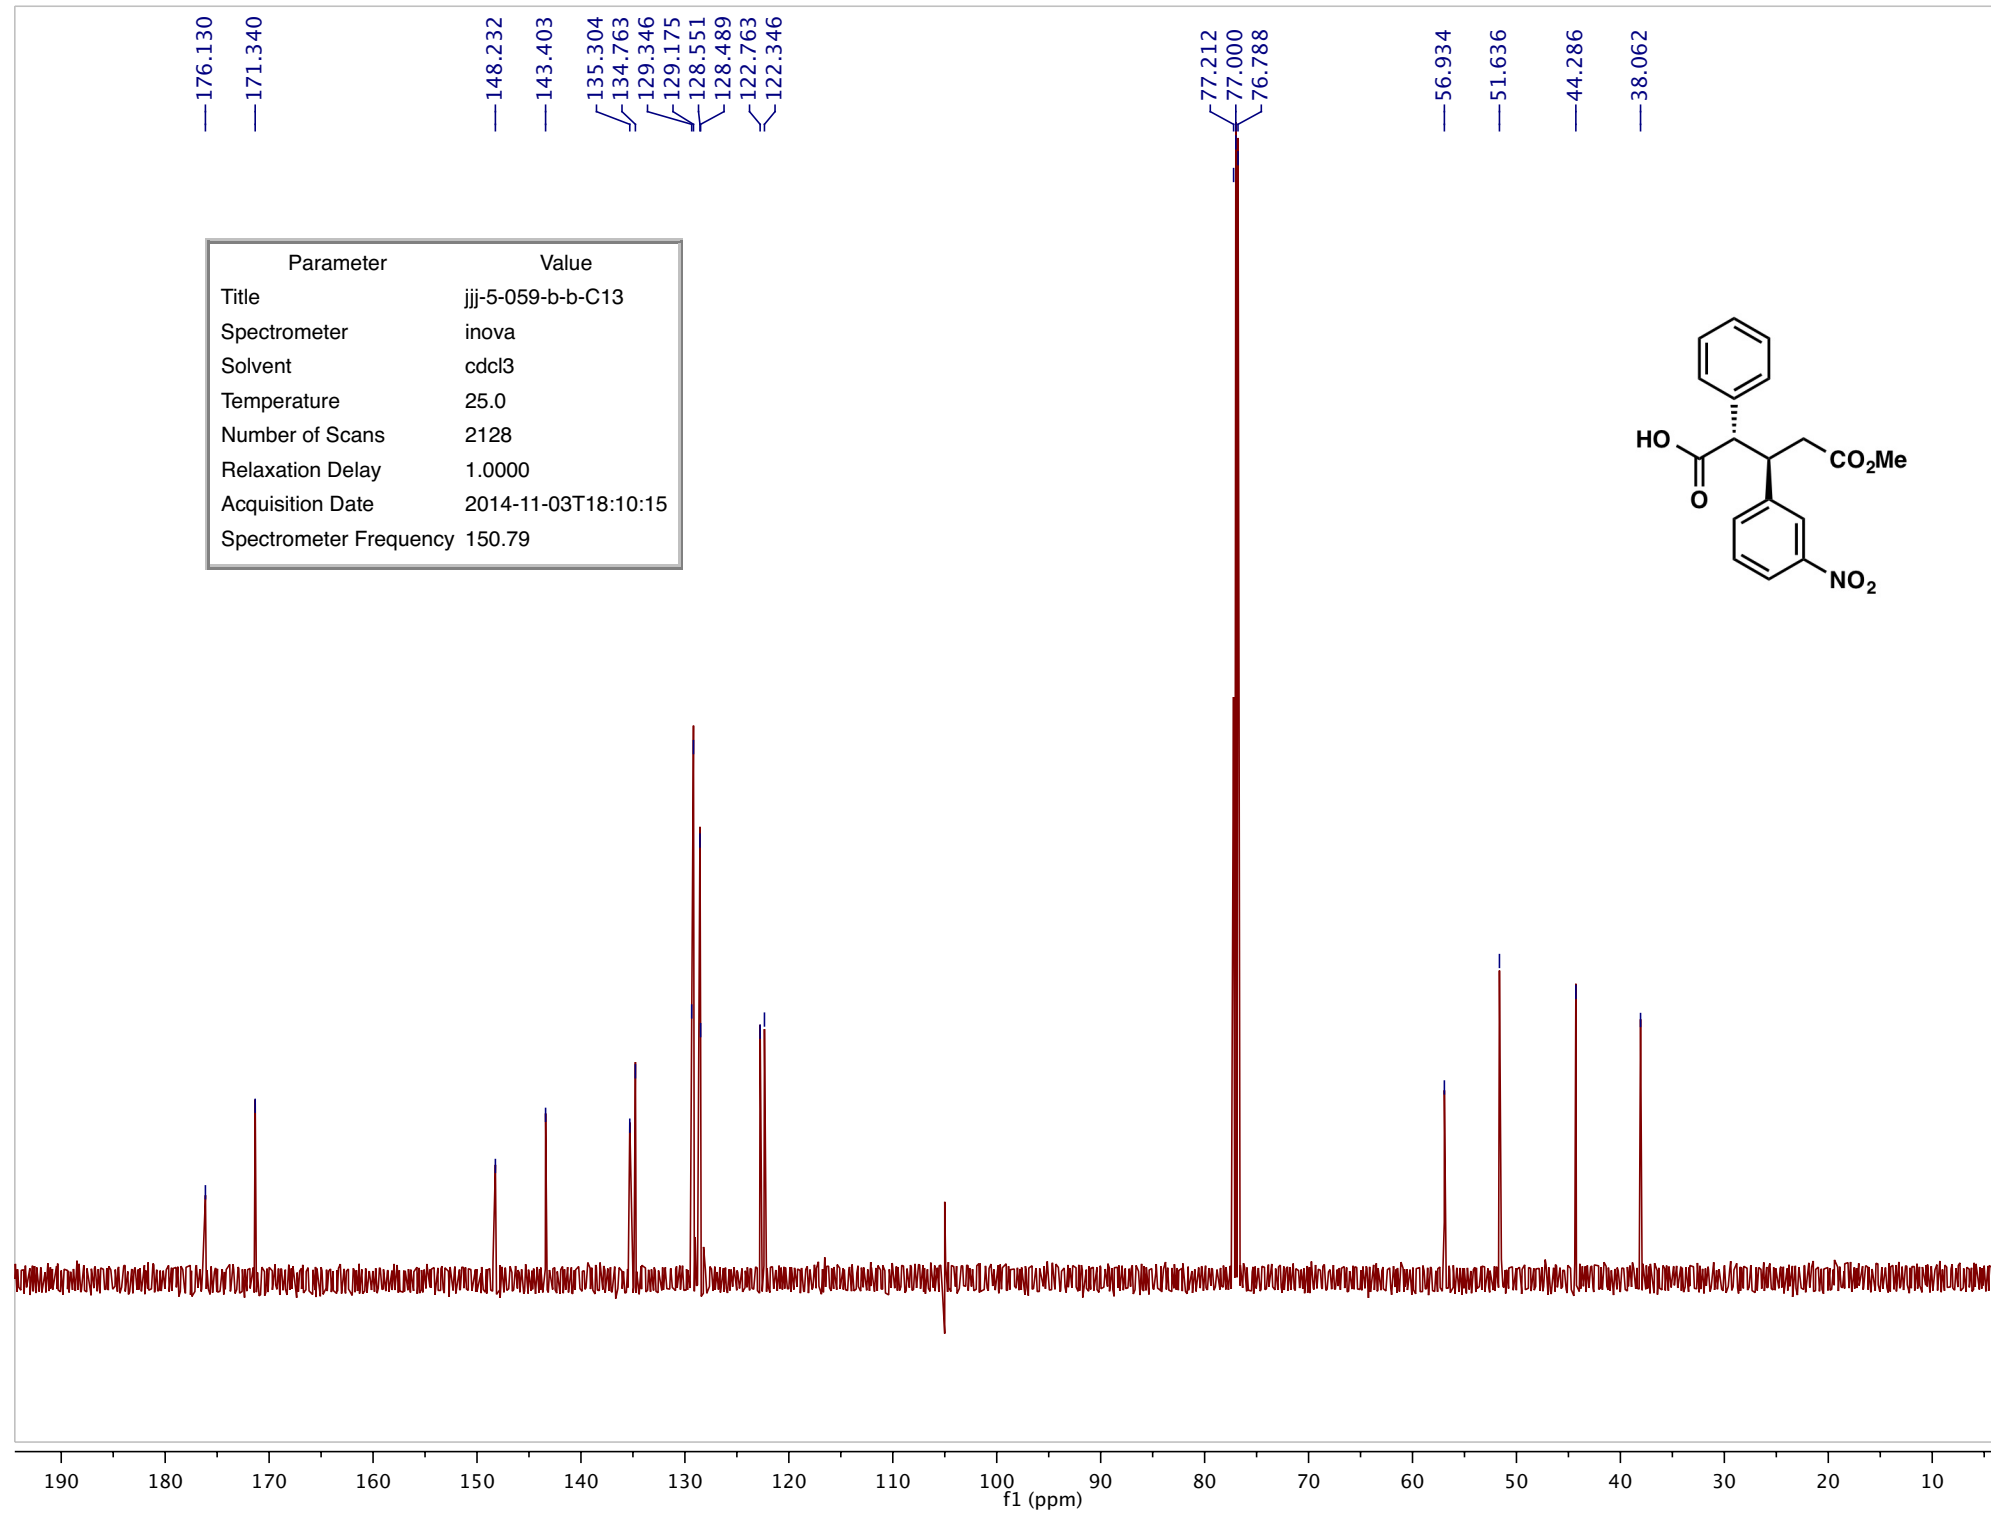

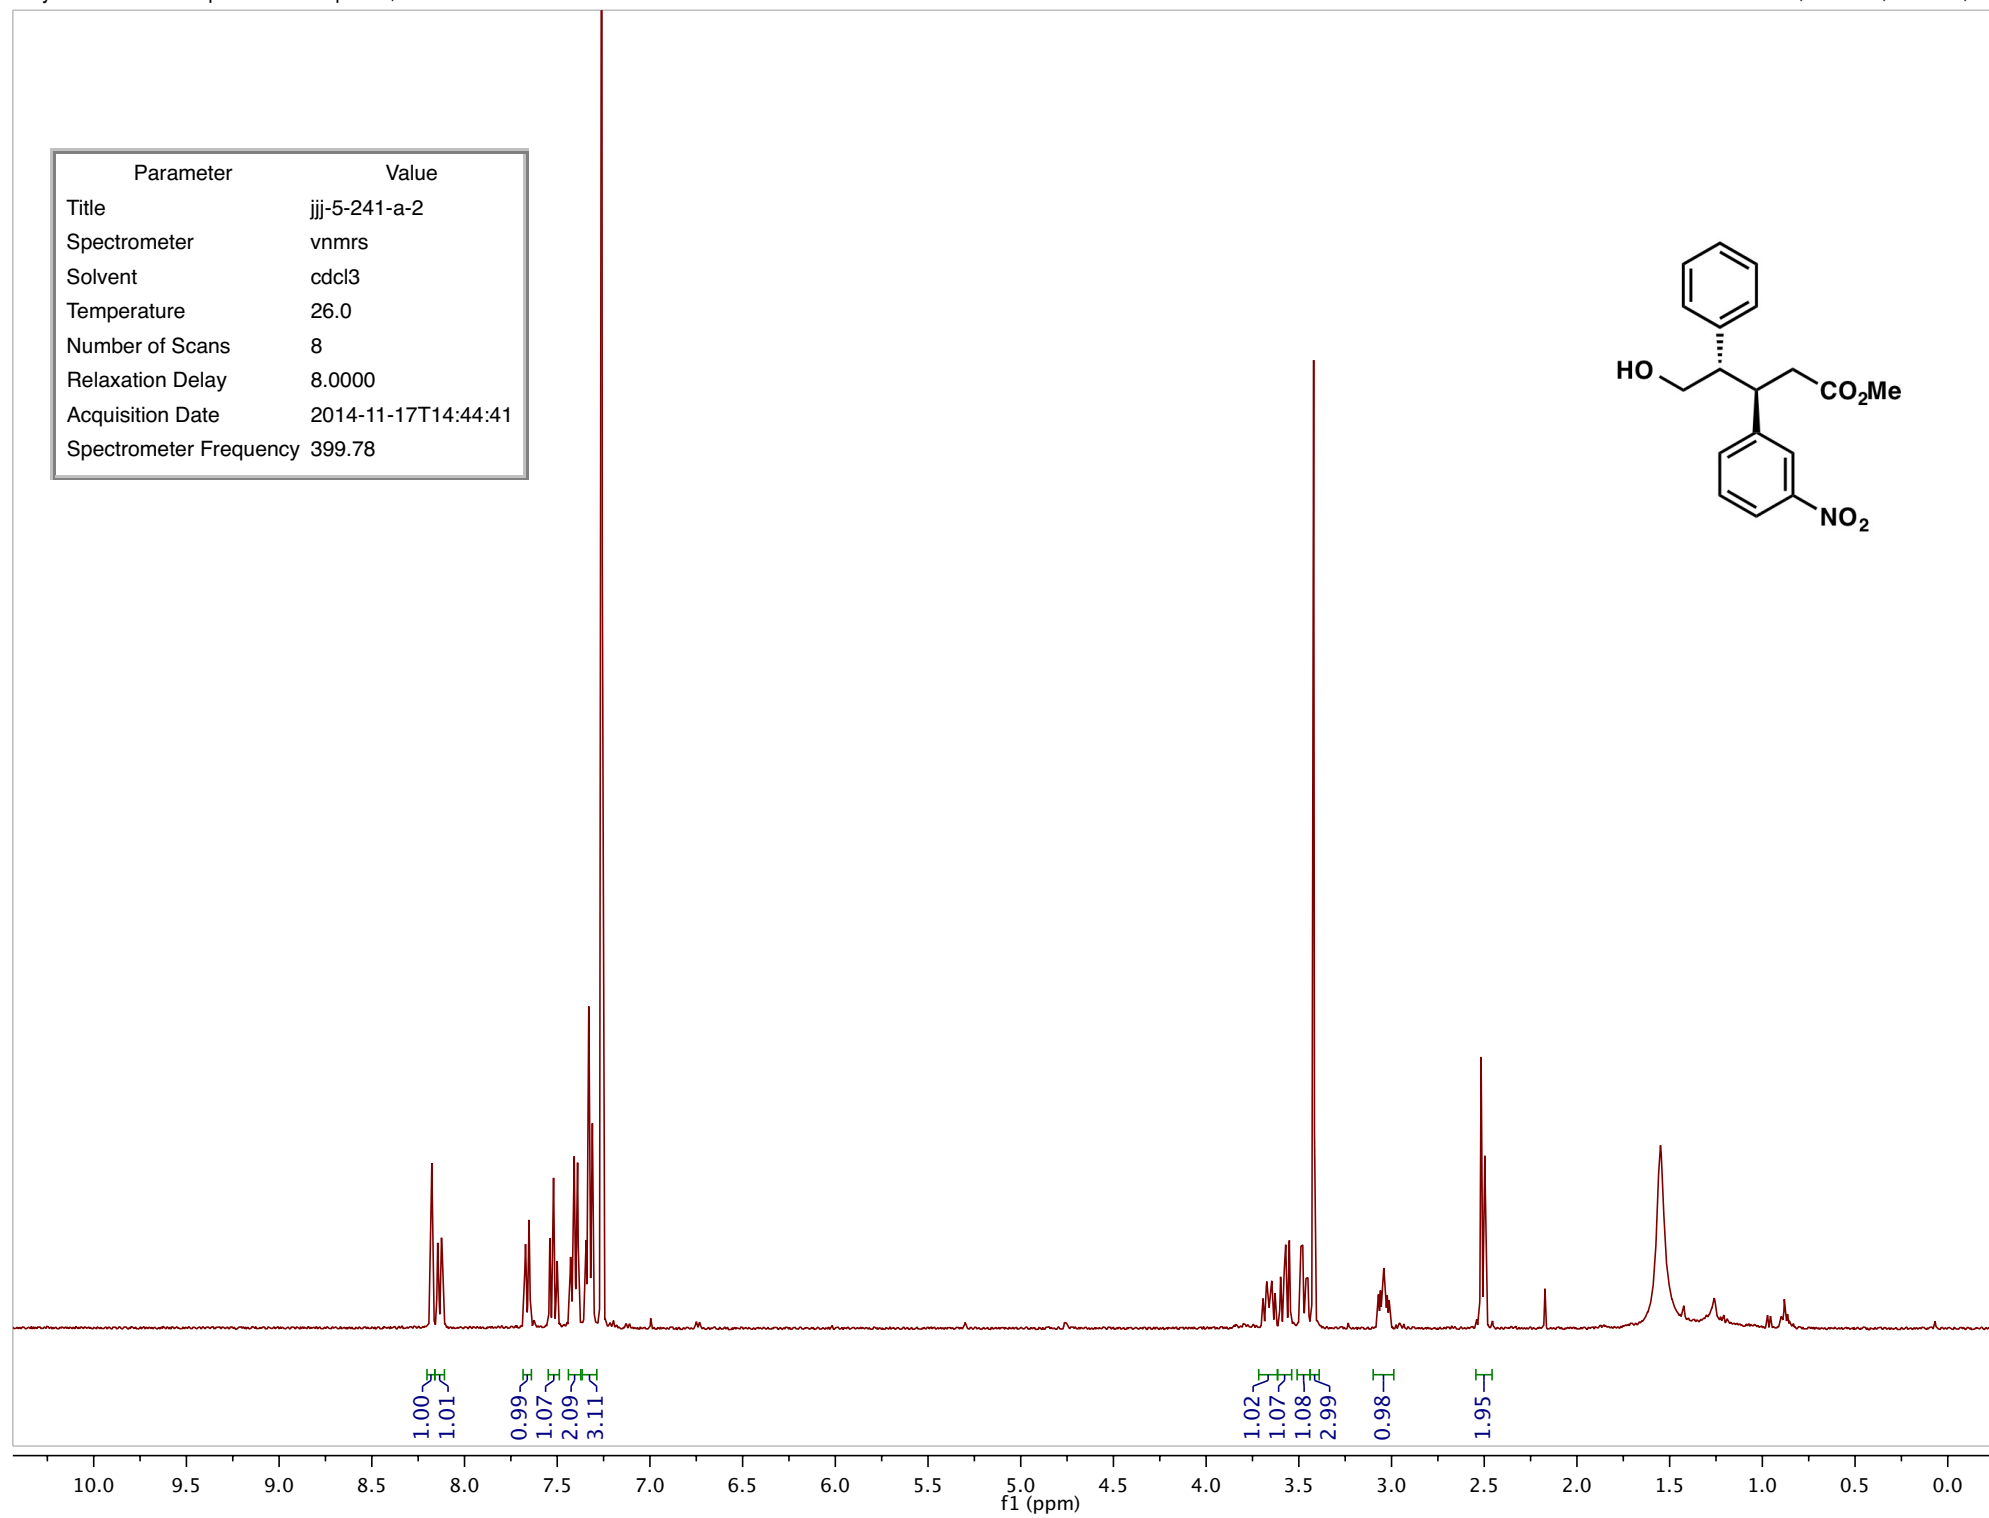

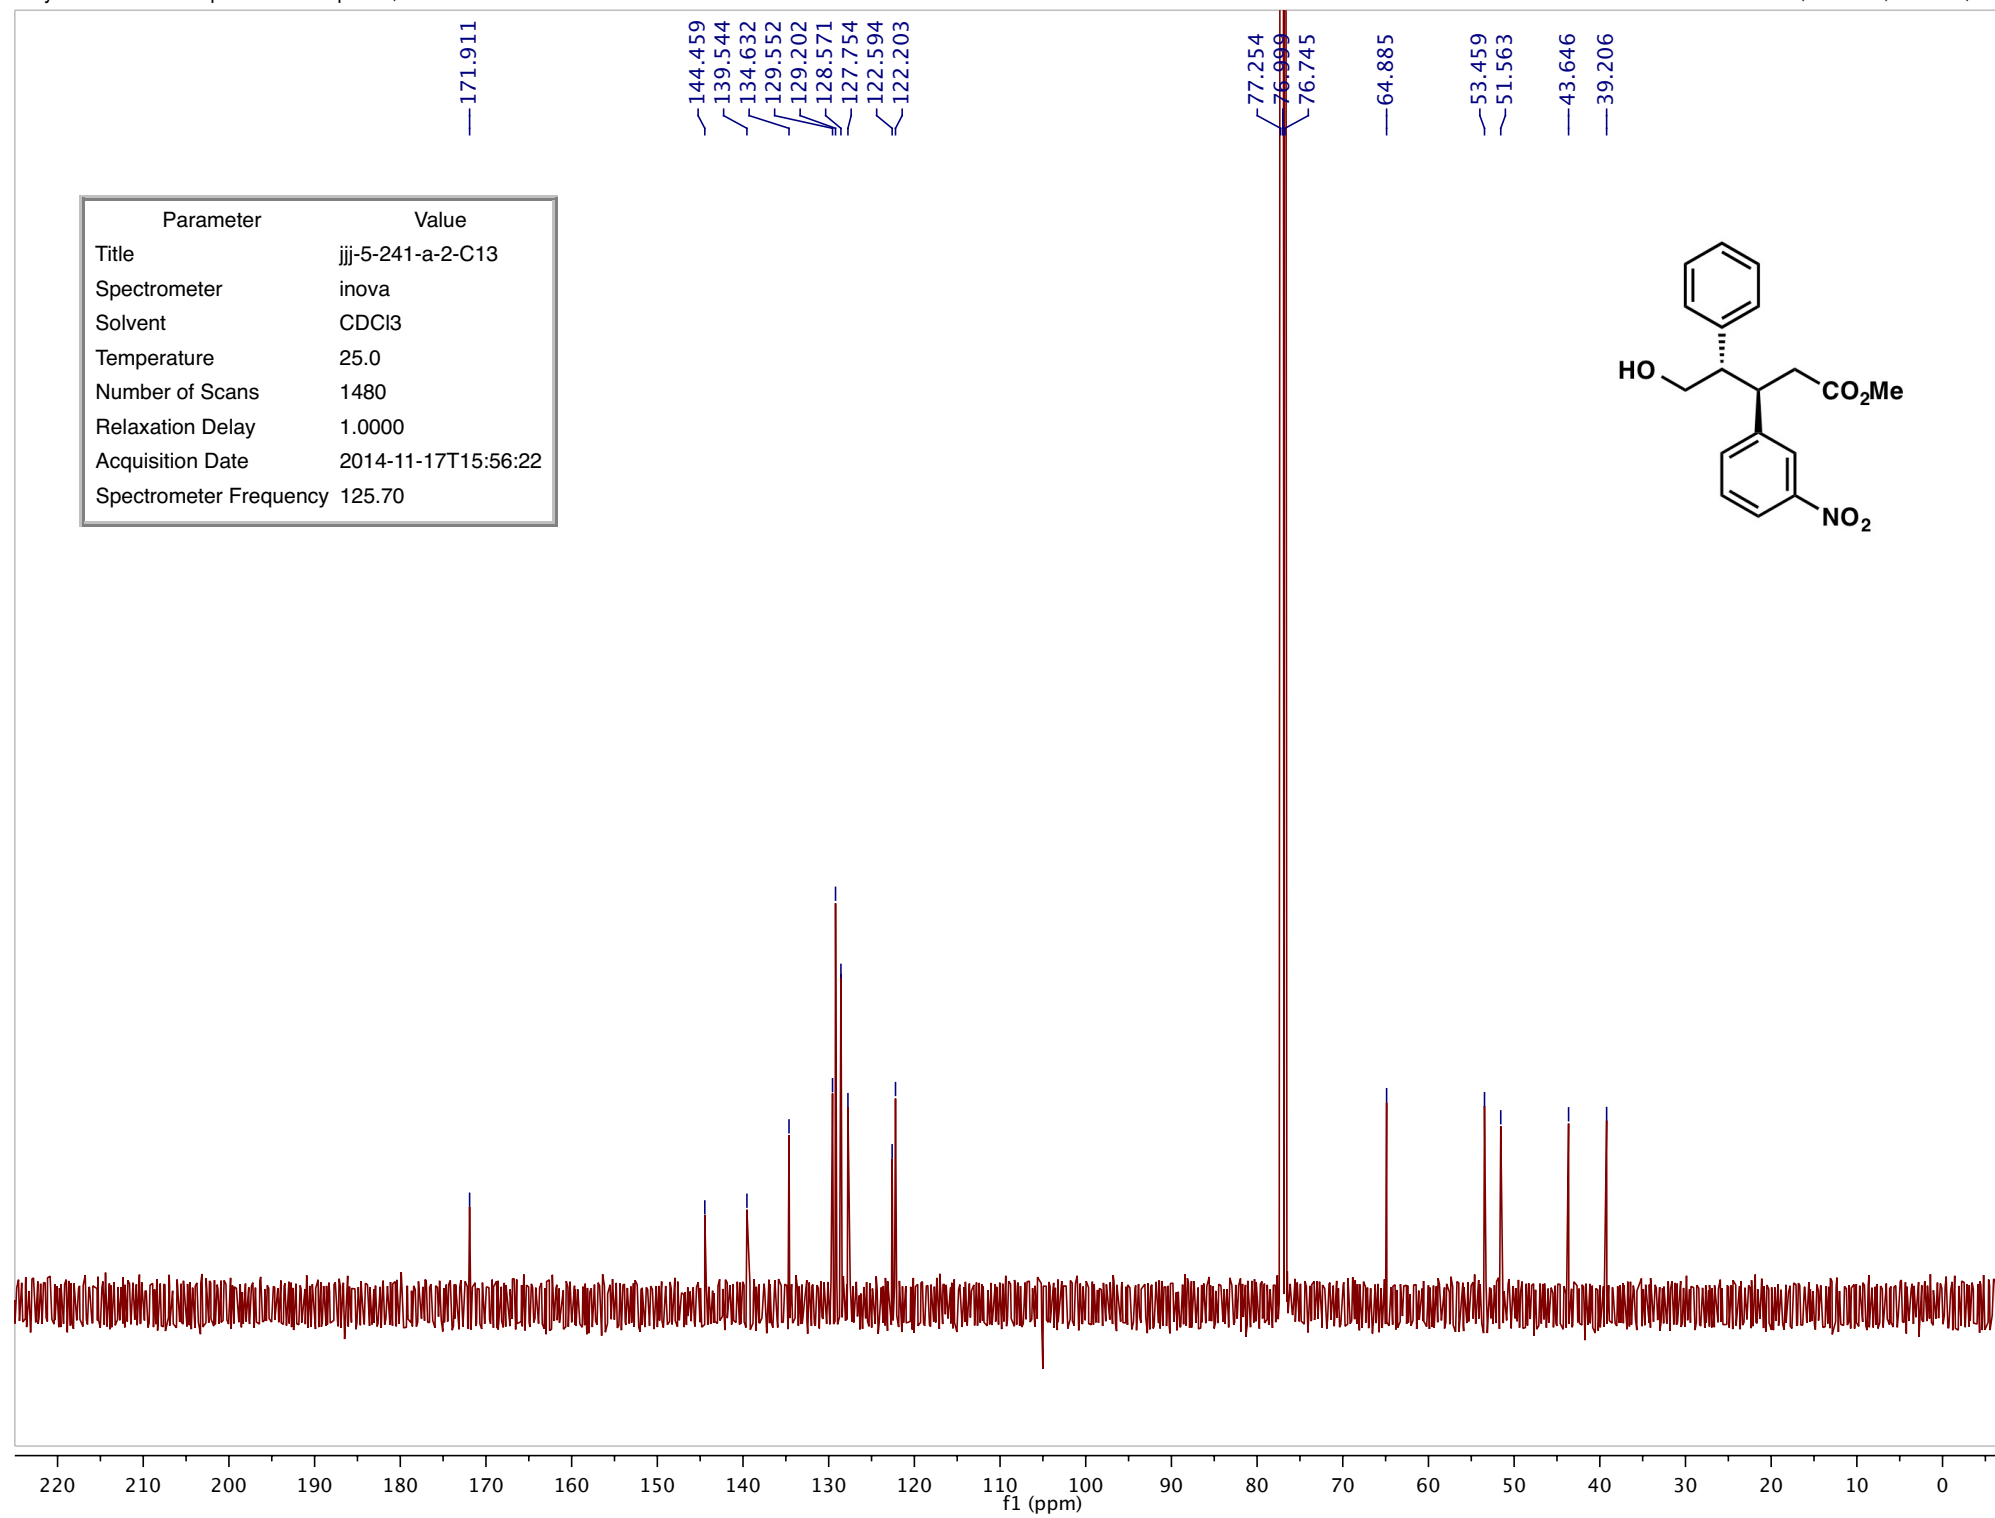

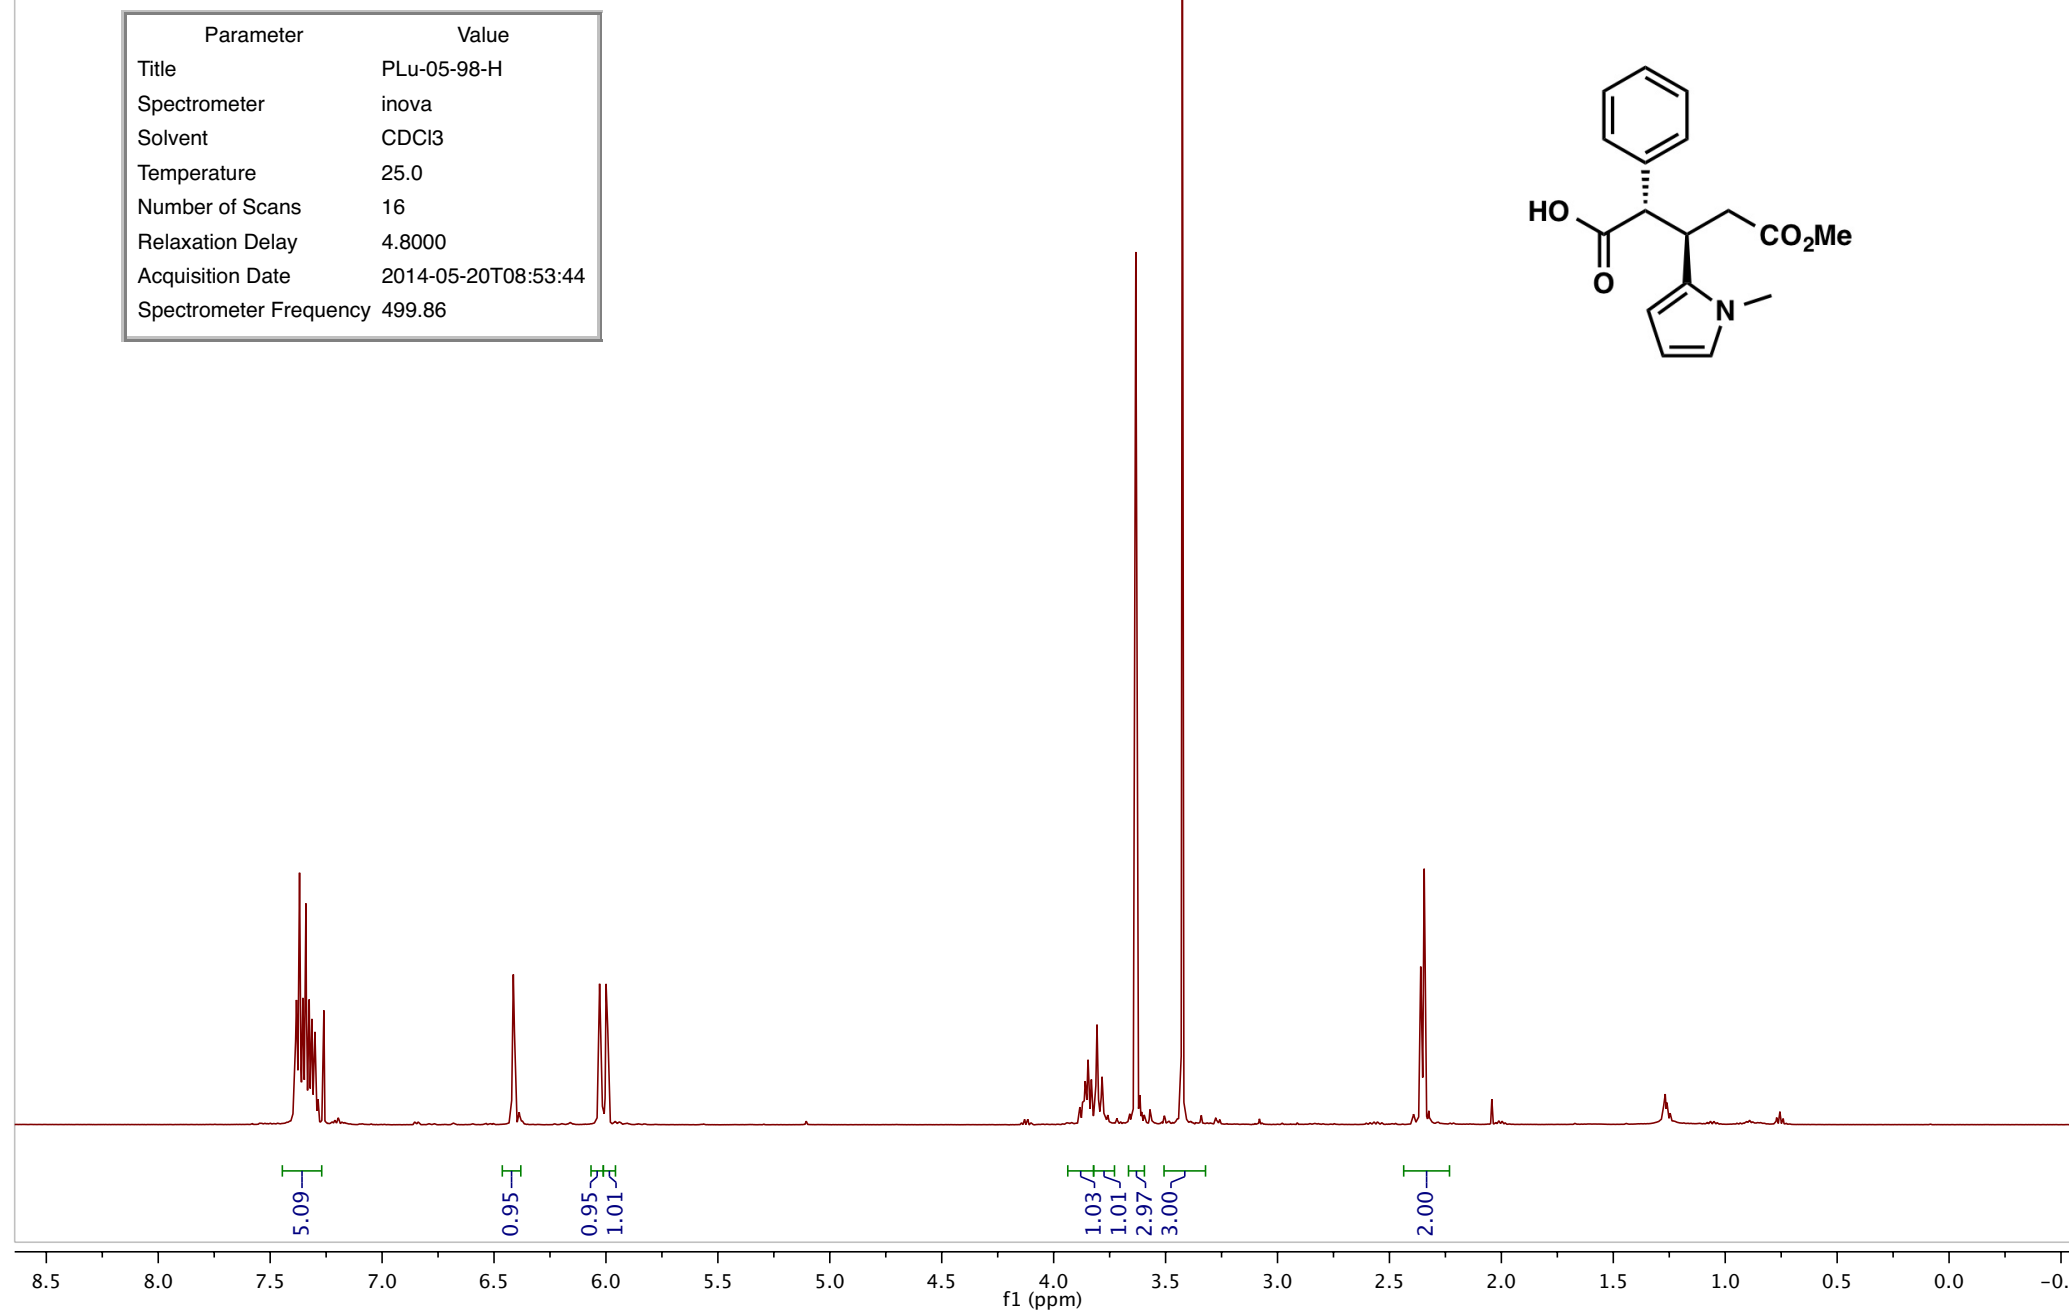

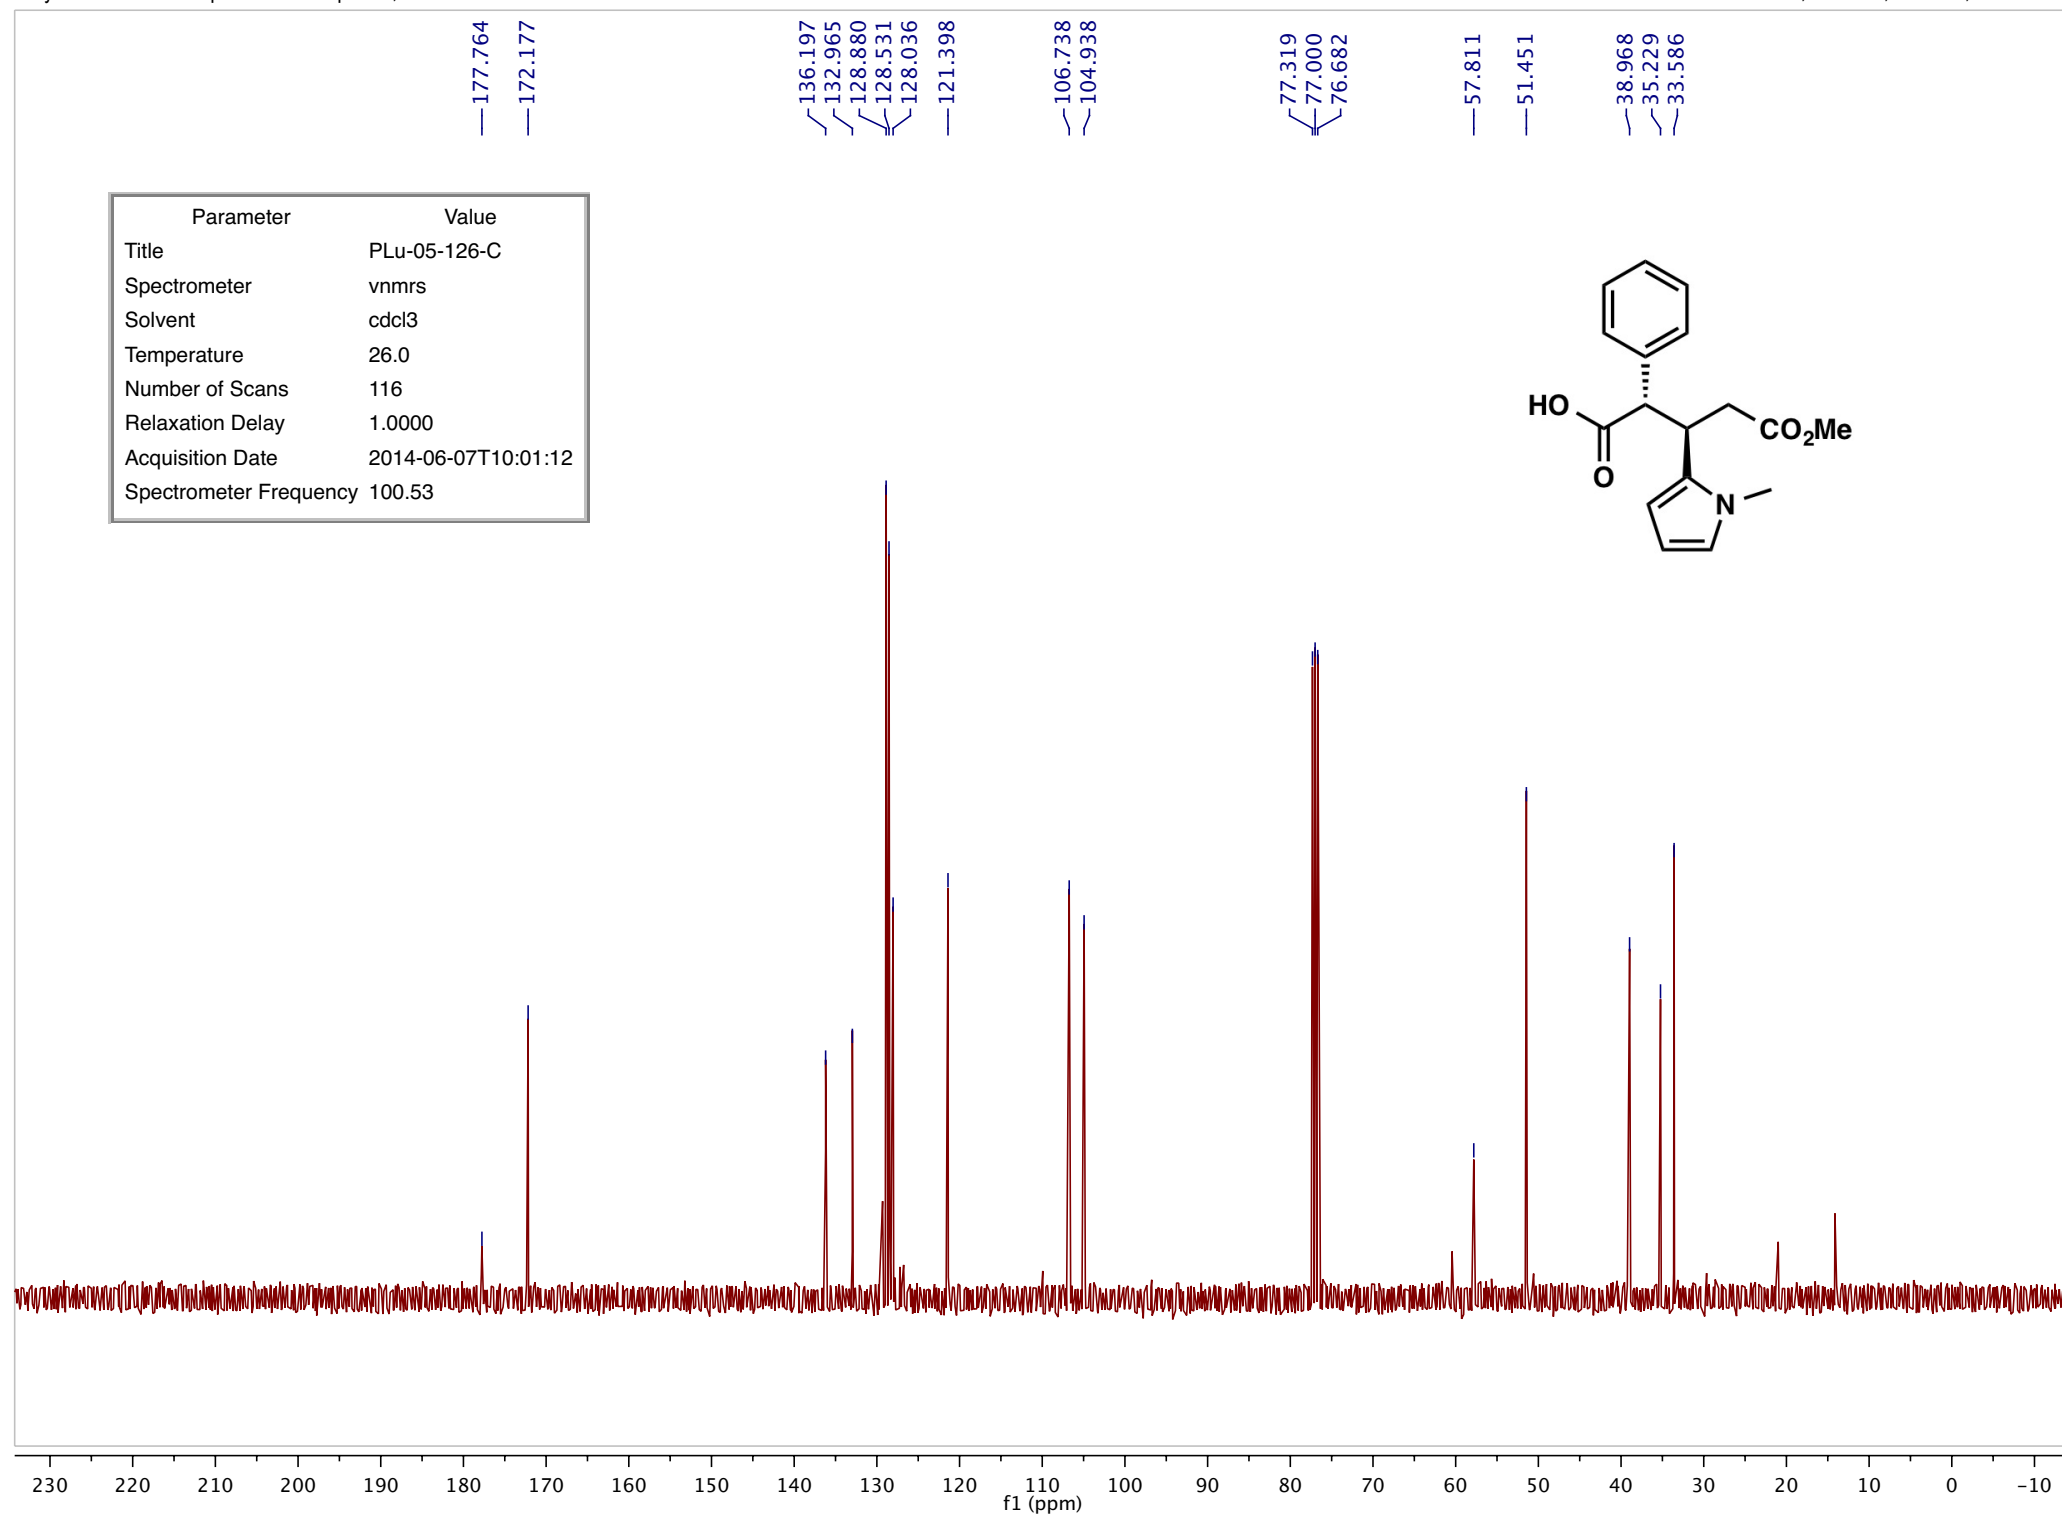

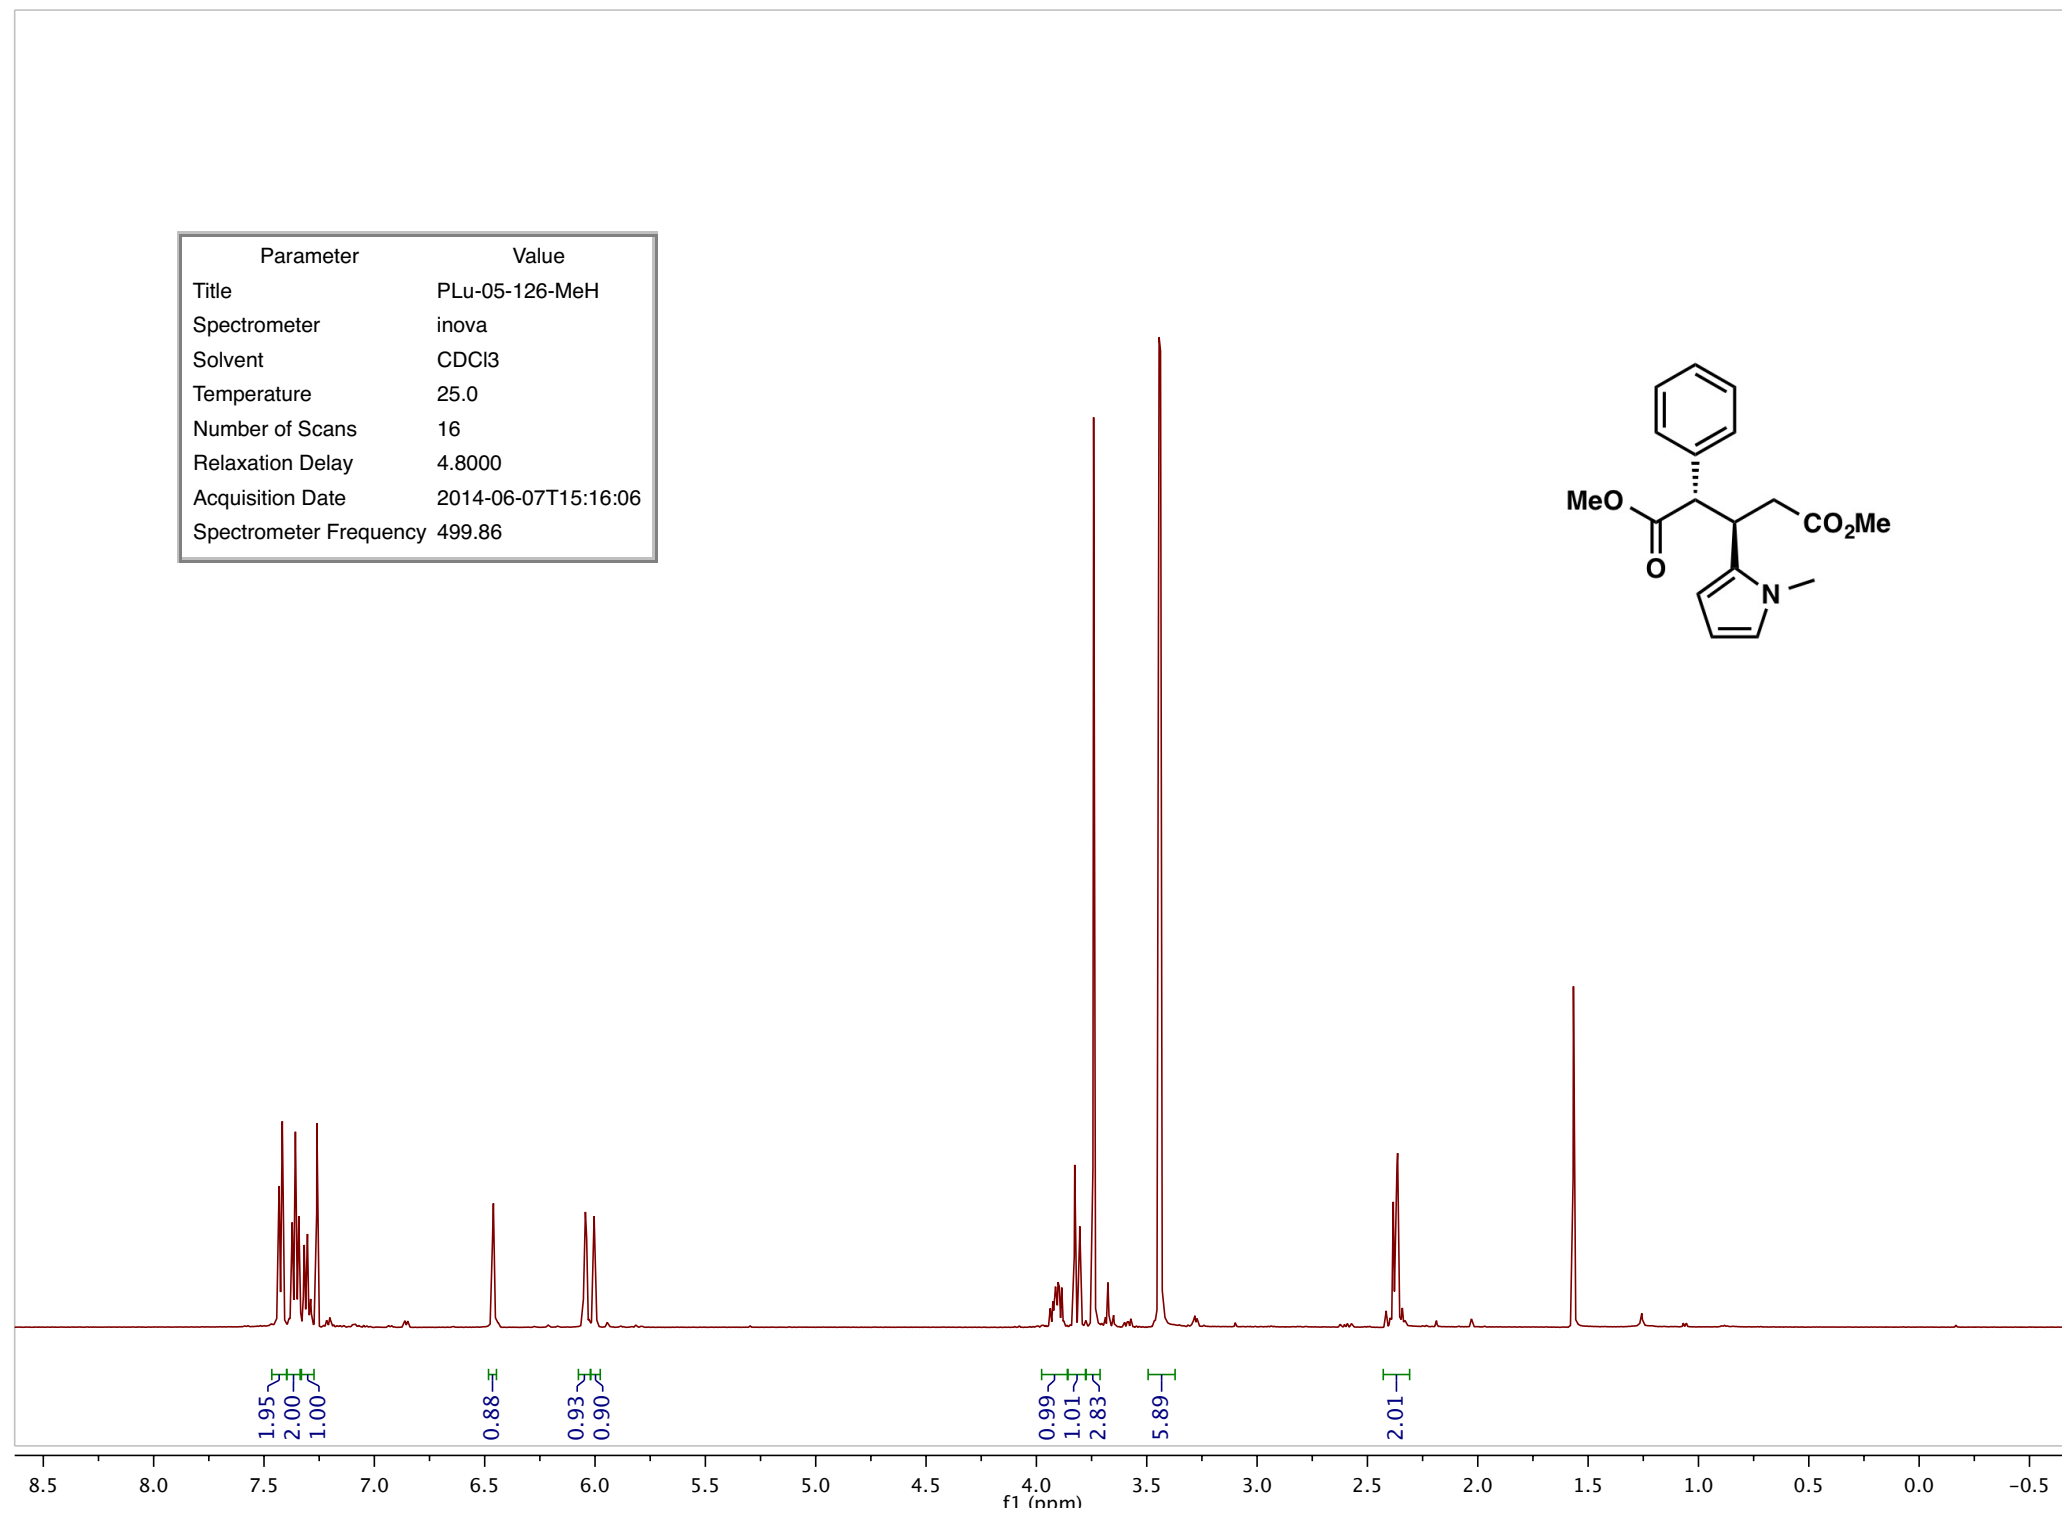



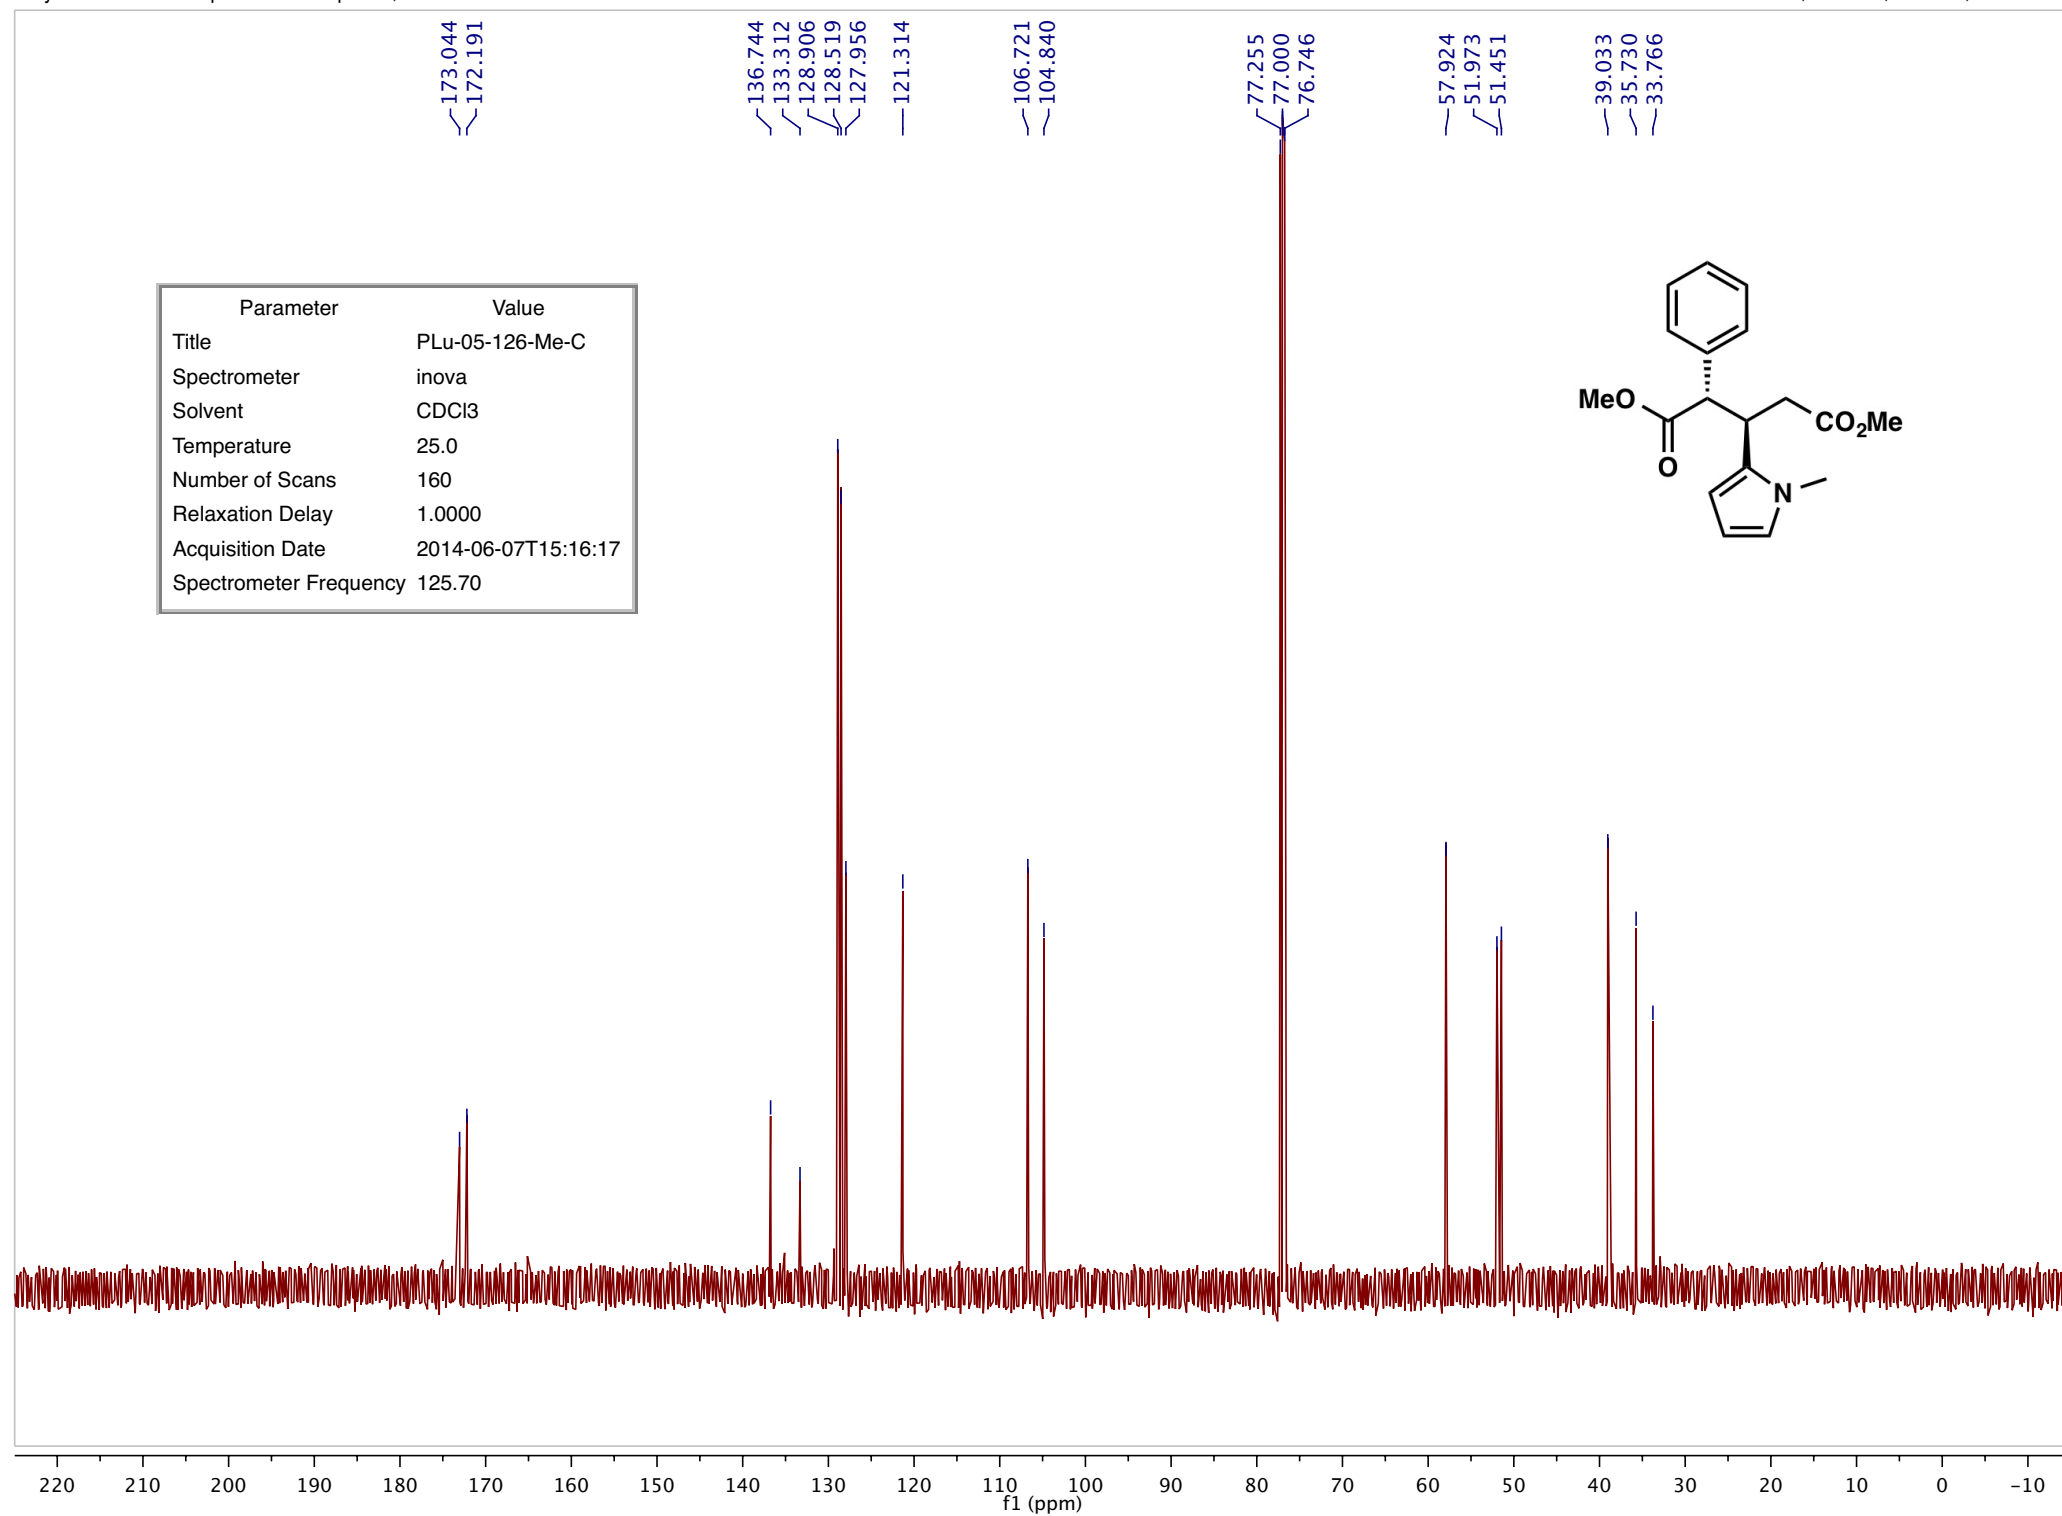

| Parameter              | Value               |
|------------------------|---------------------|
| Title                  | PLu-05-126-Me-C     |
| Spectrometer           | inova               |
| Solvent                | CDCl3               |
| Temperature            | 25.0                |
| Number of Scans        | 160                 |
| Relaxation Delay       | 1.0000              |
| Acquisition Date       | 2014-06-07T15:16:17 |
| Spectrometer Frequency | 125.70              |

| Parameter              | Value               |
|------------------------|---------------------|
| Title                  | PLu-05-112-H        |
| Spectrometer           | vnmrs               |
| Solvent                | cdcl3               |
| Temperature            | 26.0                |
| Number of Scans        | 16                  |
| Relaxation Delay       | 4.8000              |
| Acquisition Date       | 2014-05-28T08:48:17 |
| Spectrometer Frequency | 399.78              |

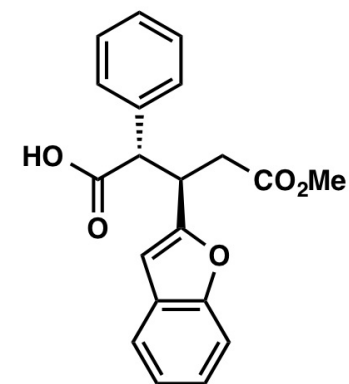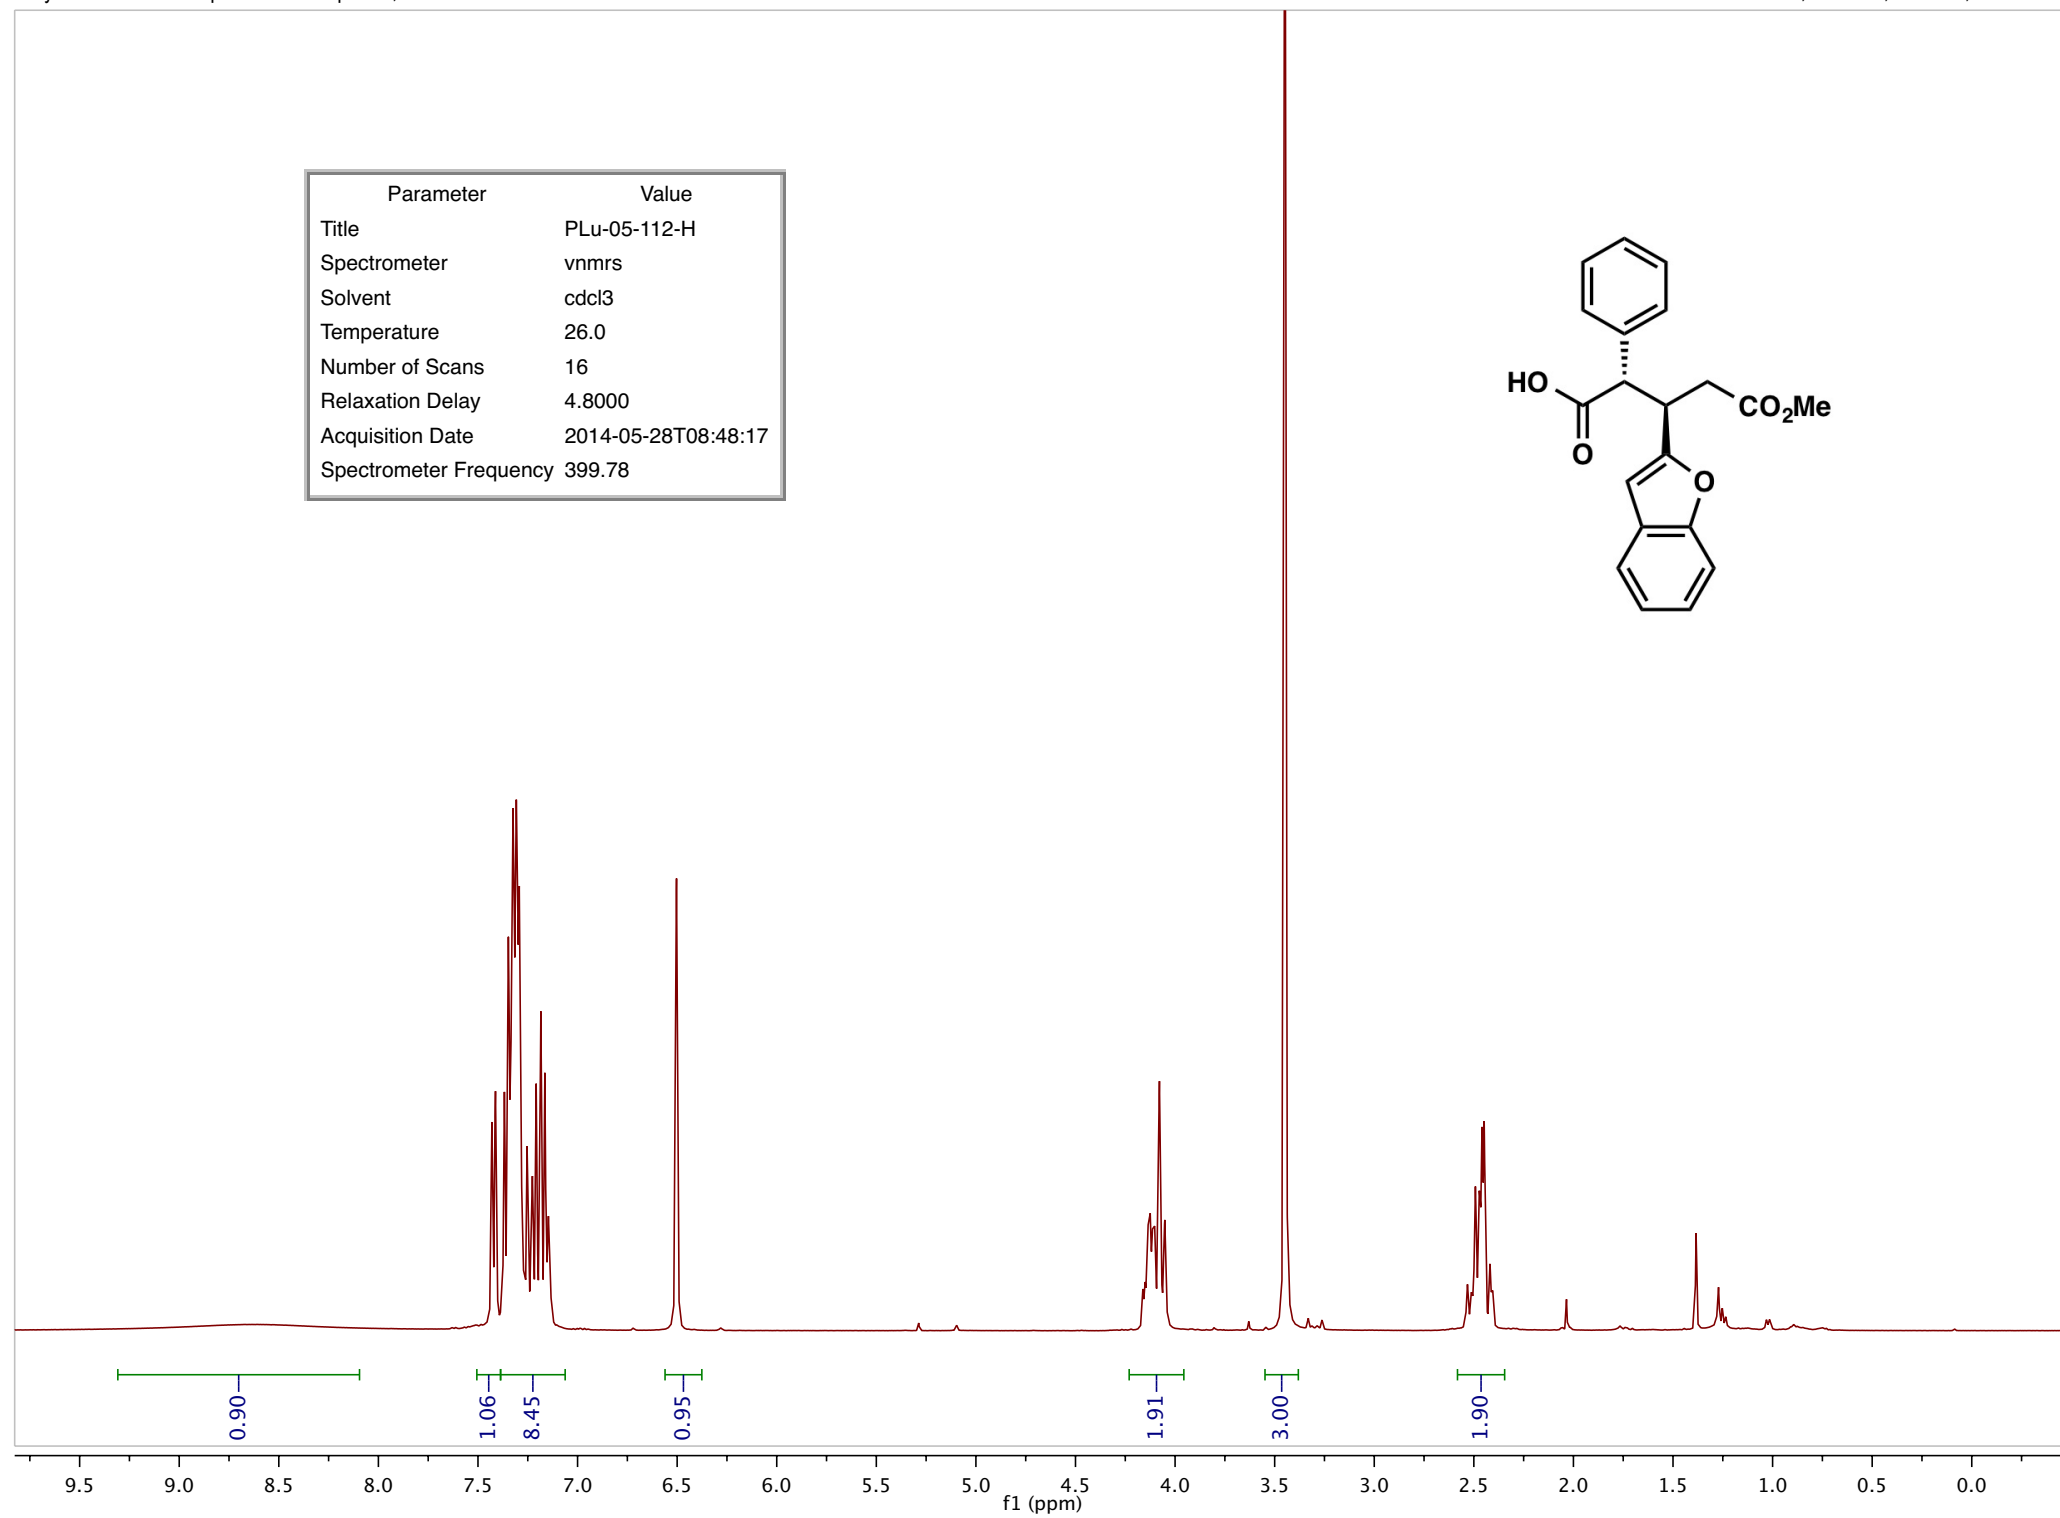

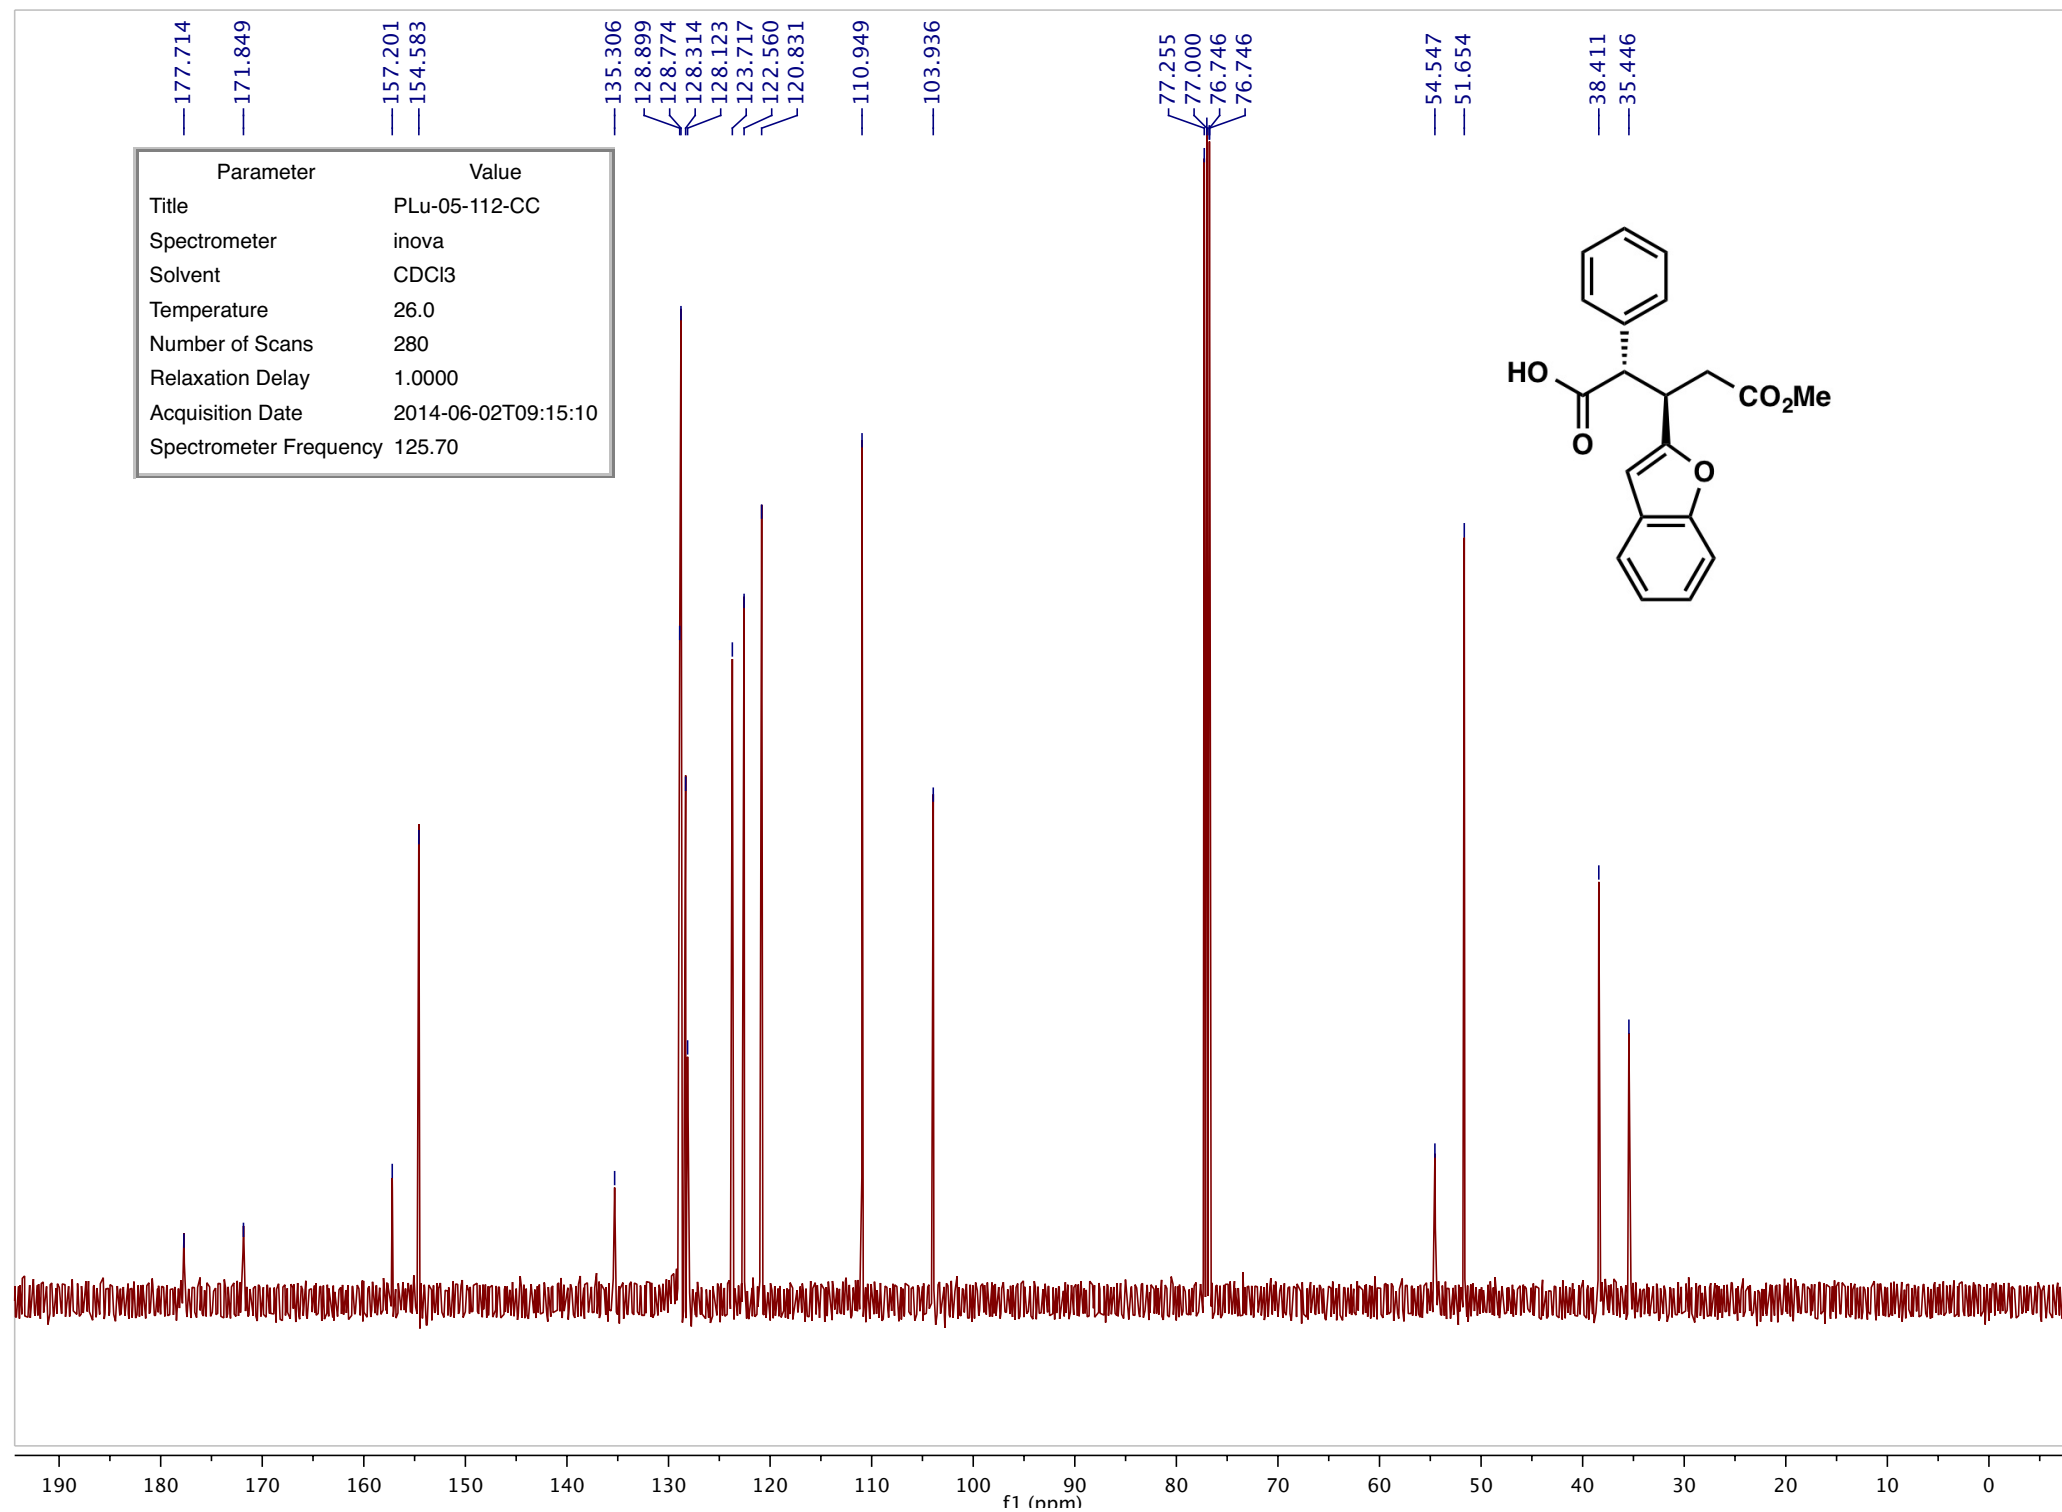

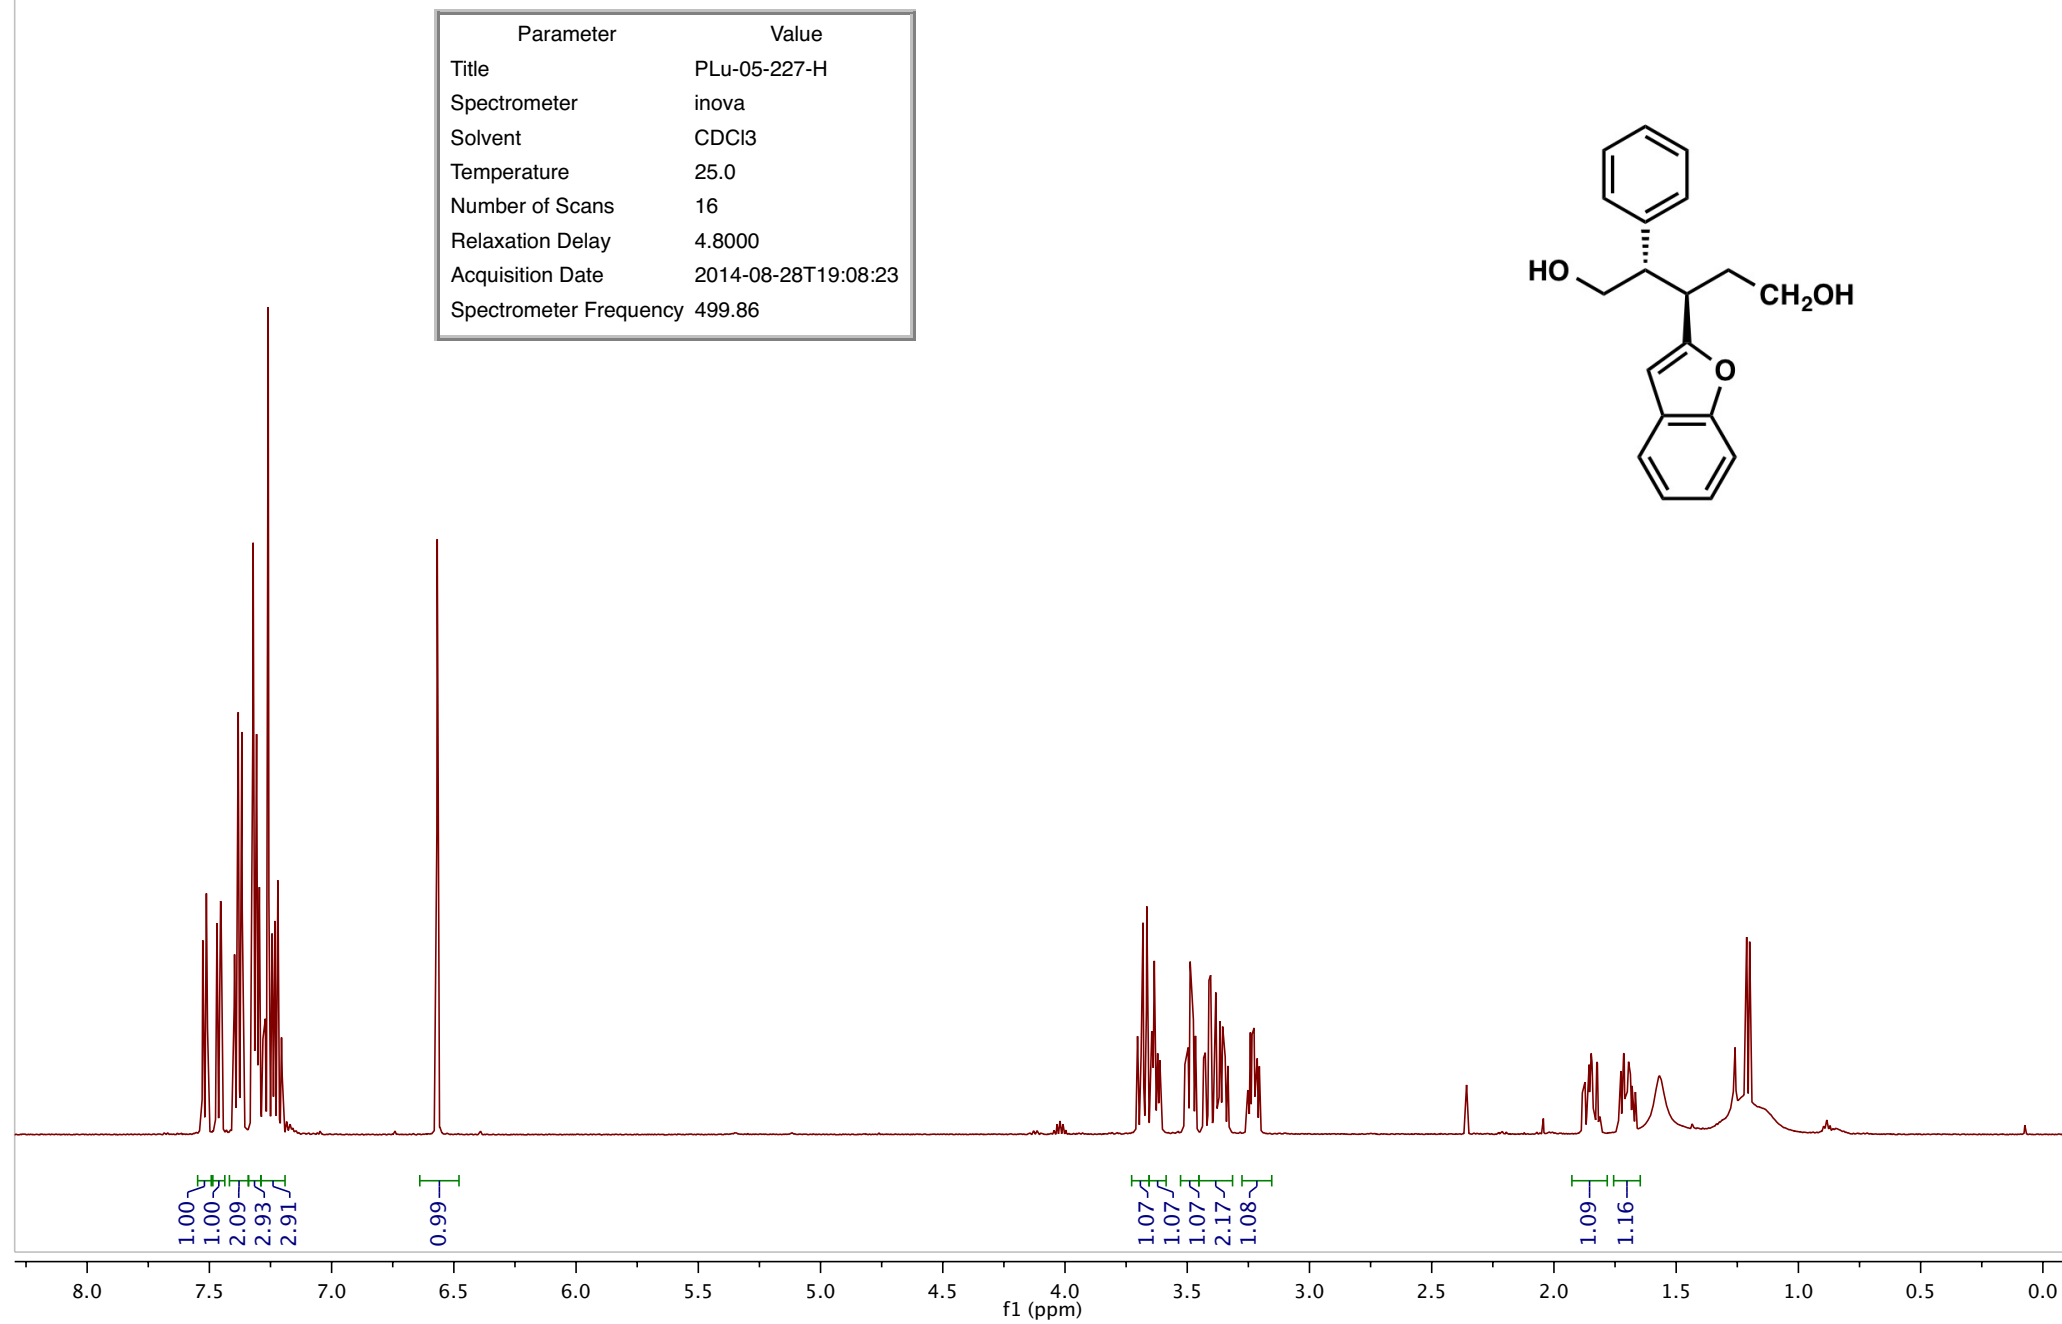

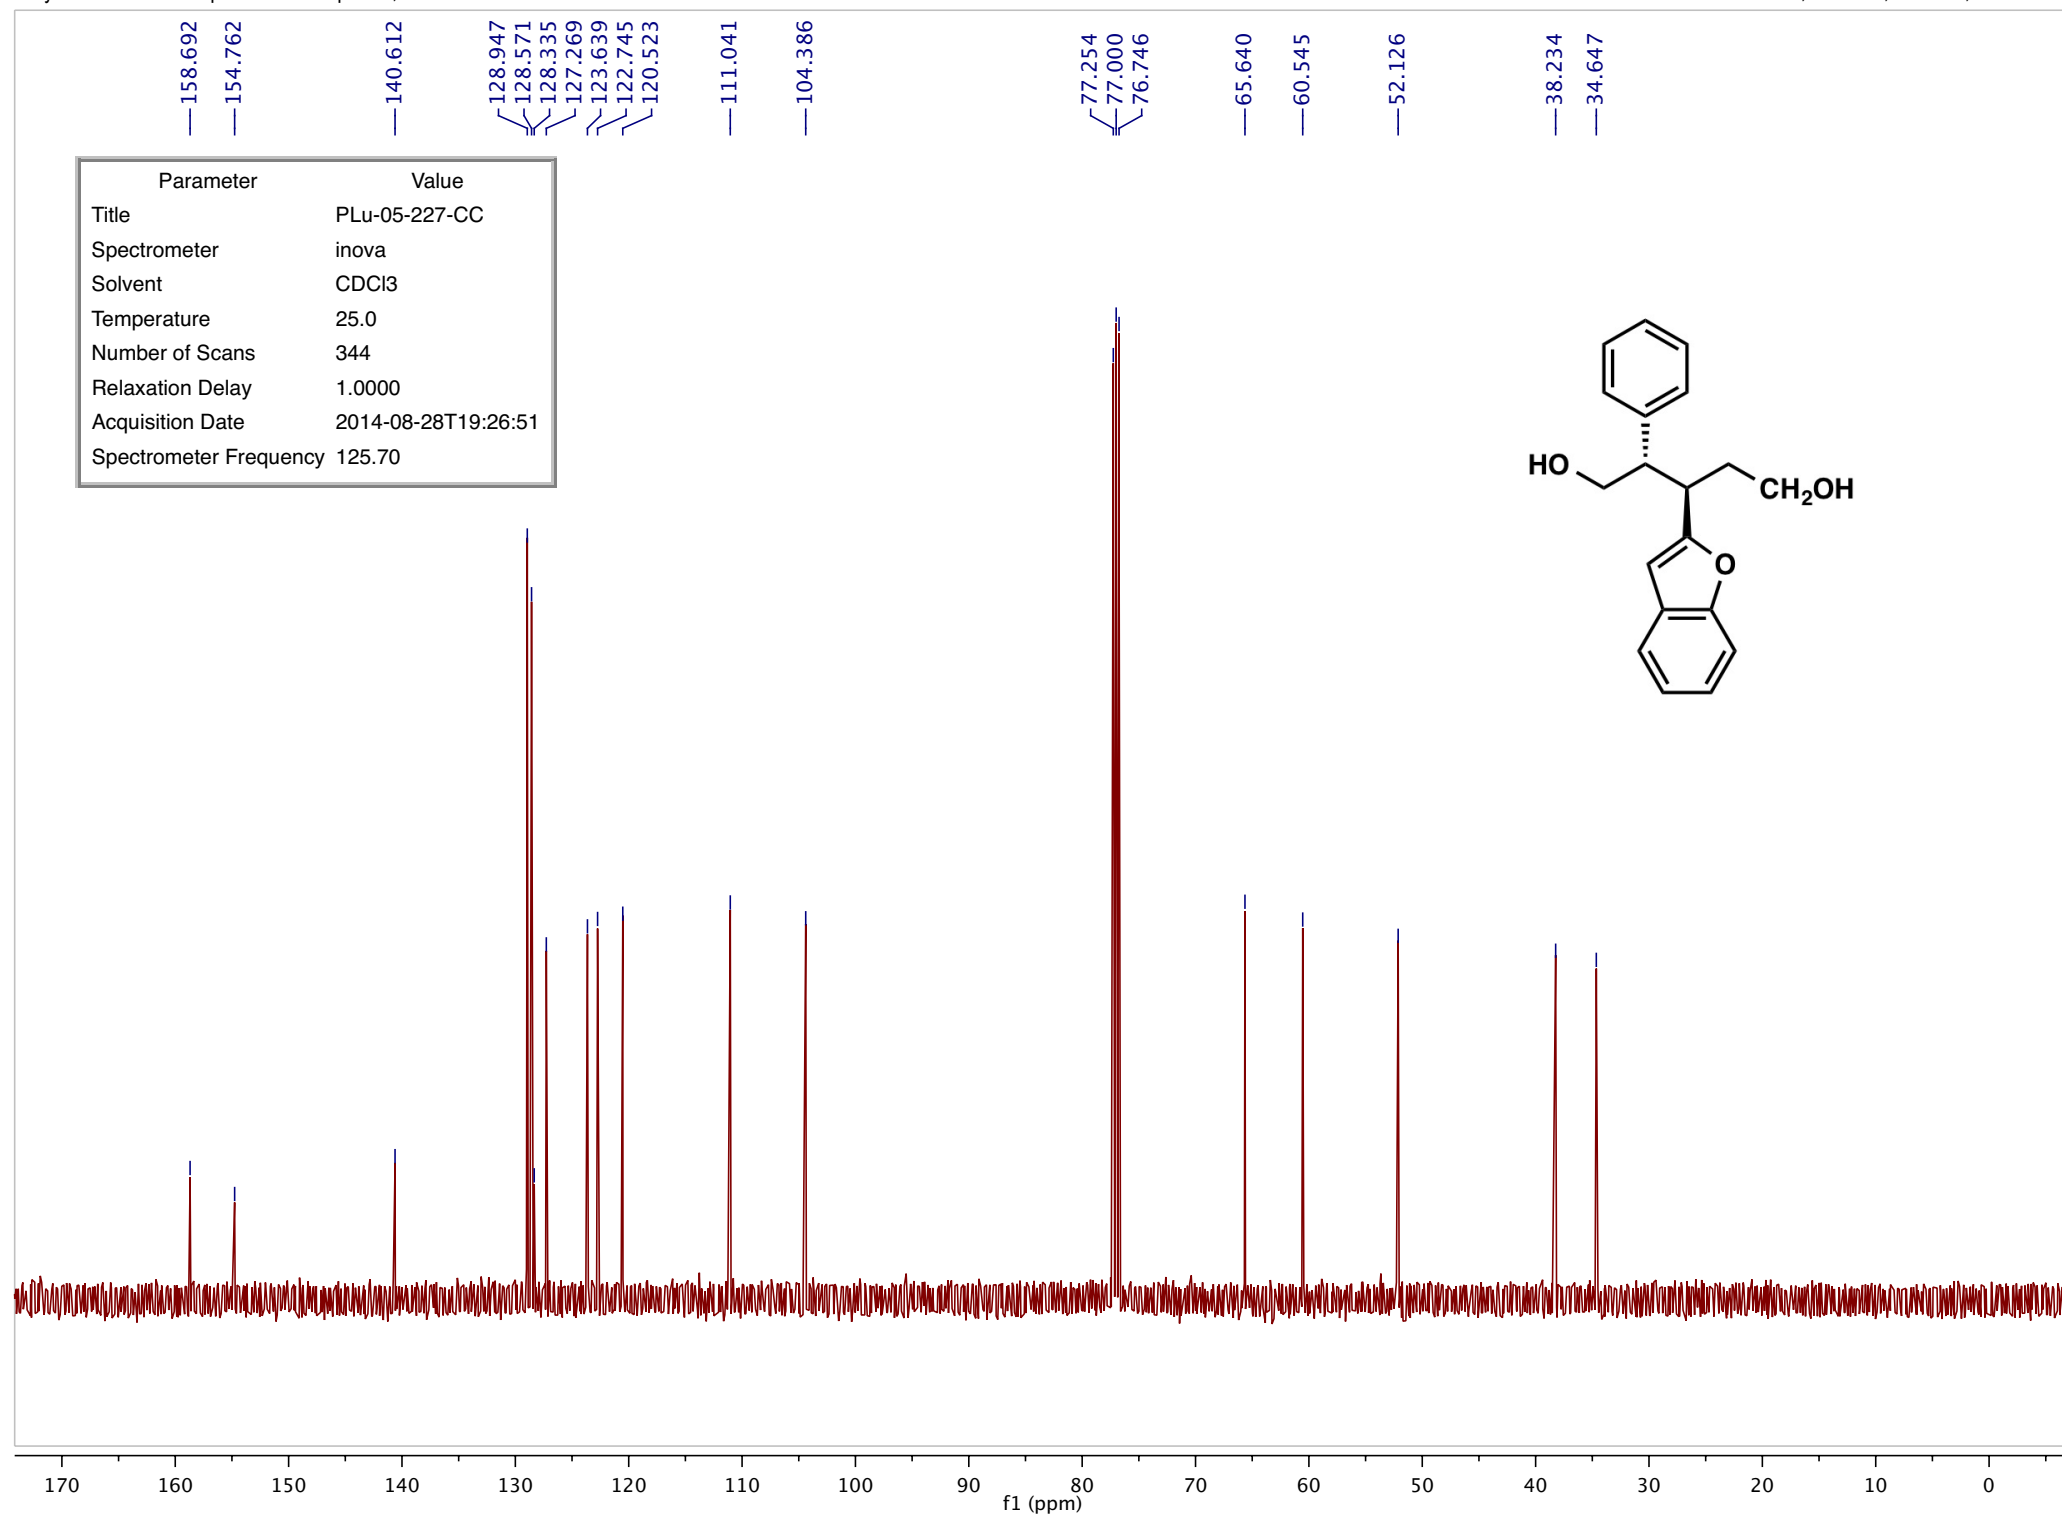

| Parameter              | Value               |
|------------------------|---------------------|
| Title                  | PLu-05-99-H         |
| Spectrometer           | inova               |
| Solvent                | CDCl <sub>3</sub>   |
| Temperature            | 25.0                |
| Number of Scans        | 16                  |
| Relaxation Delay       | 4.8000              |
| Acquisition Date       | 2014-05-20T08:34:38 |
| Spectrometer Frequency | 499.86              |

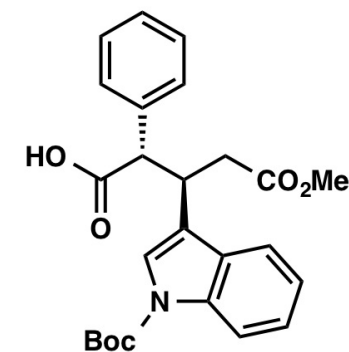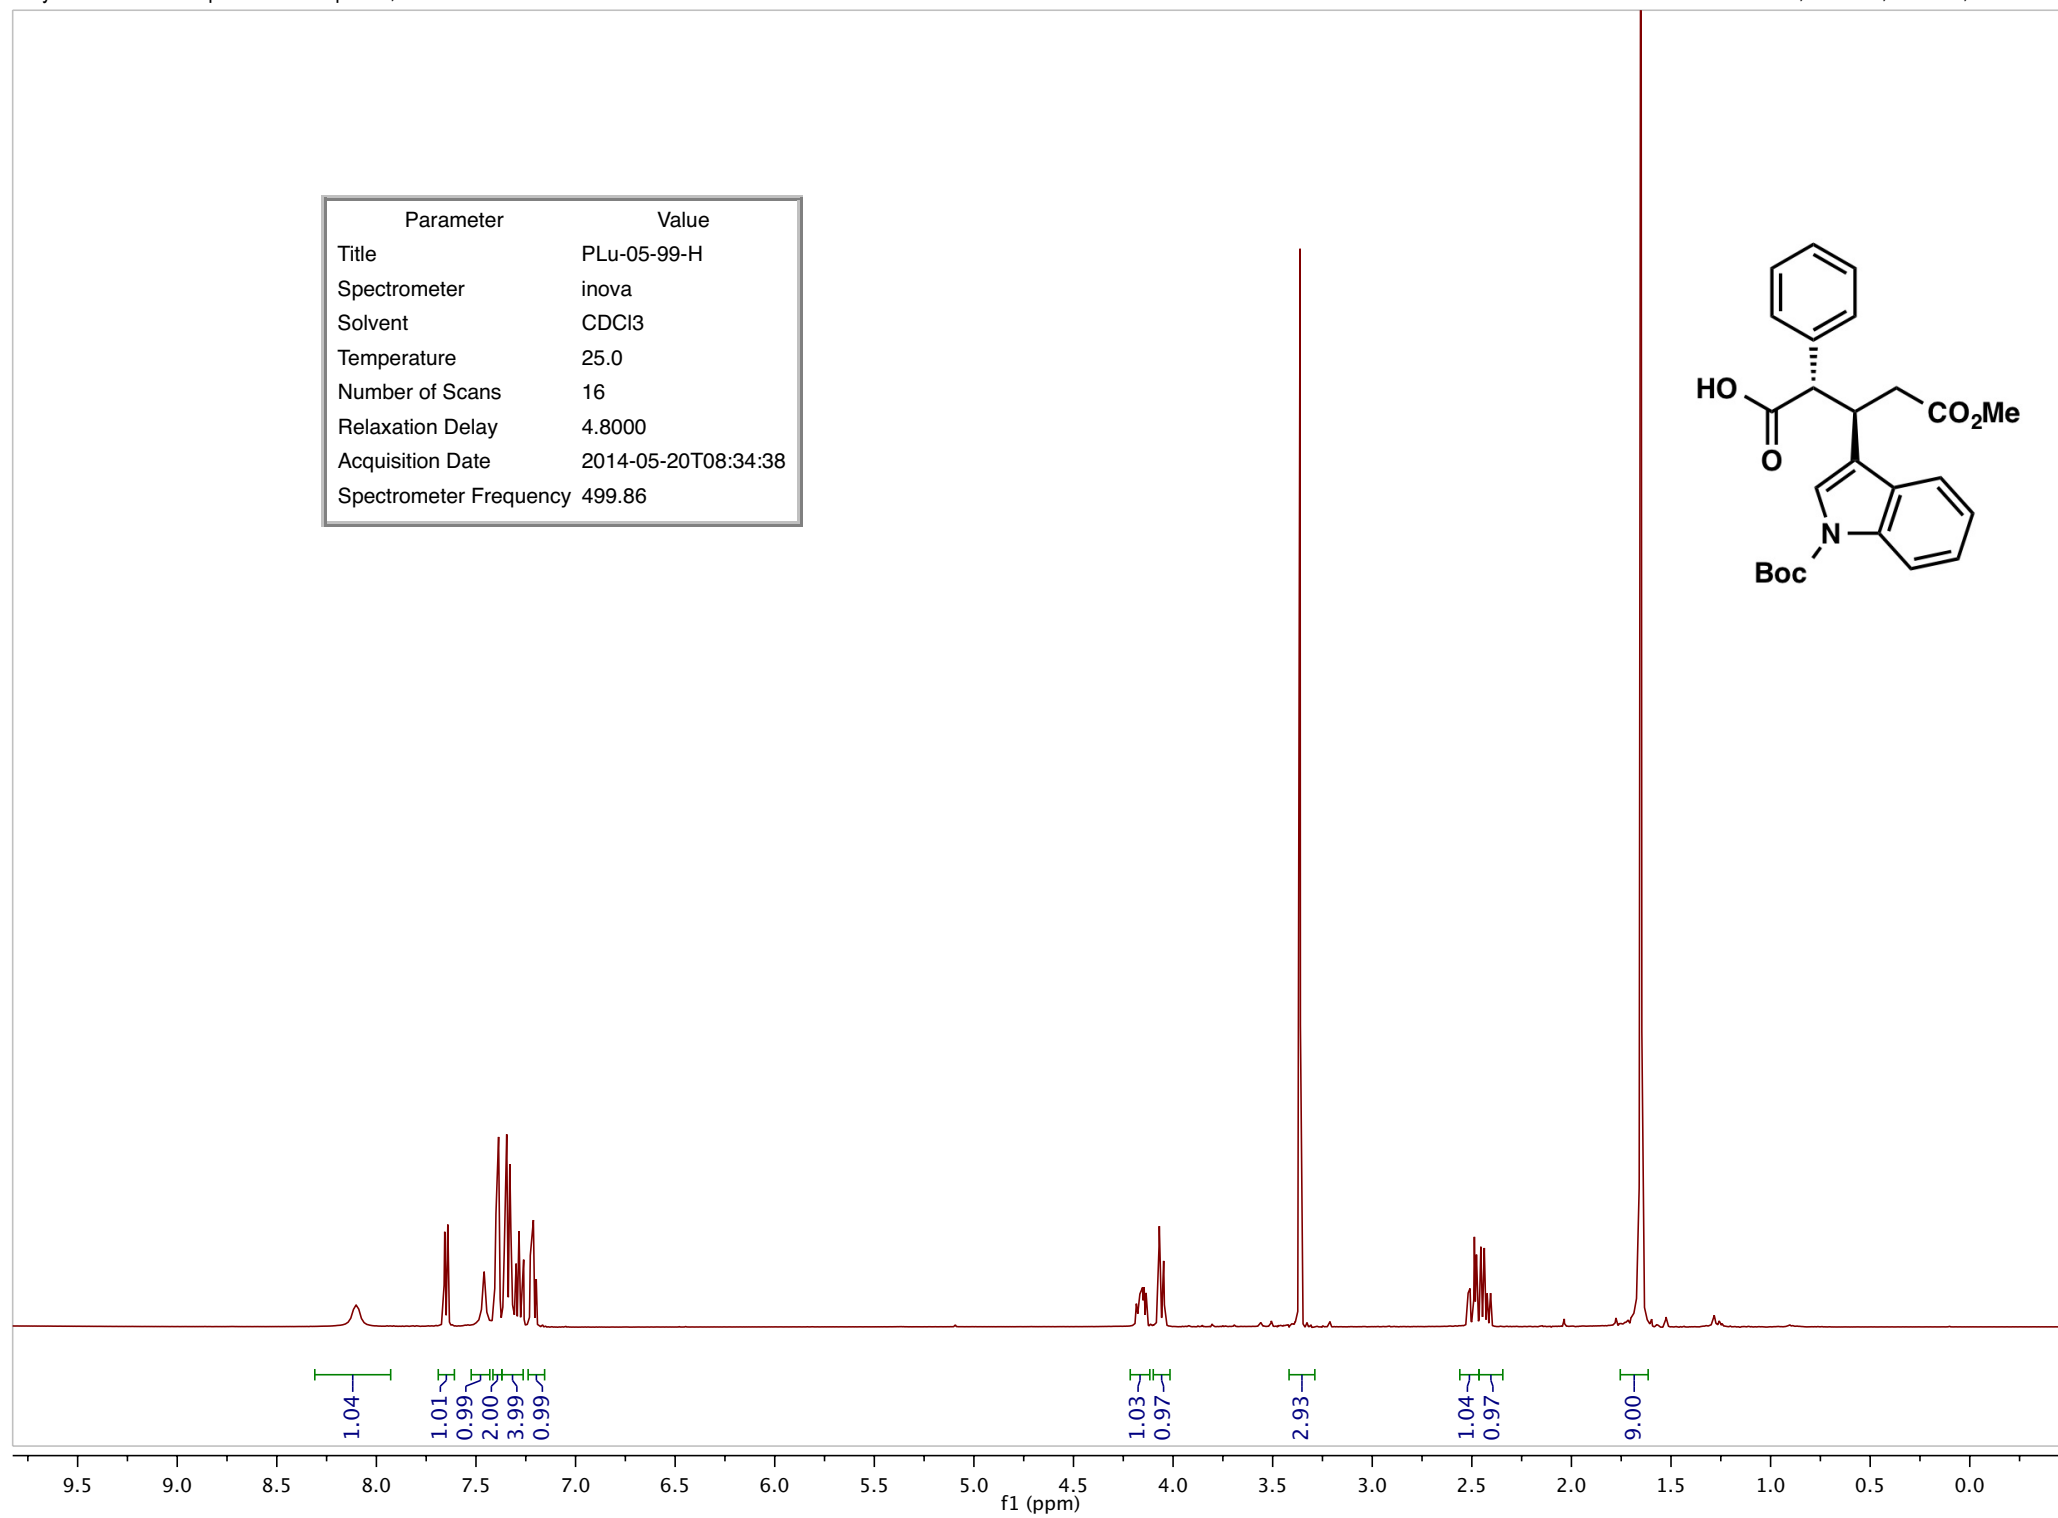

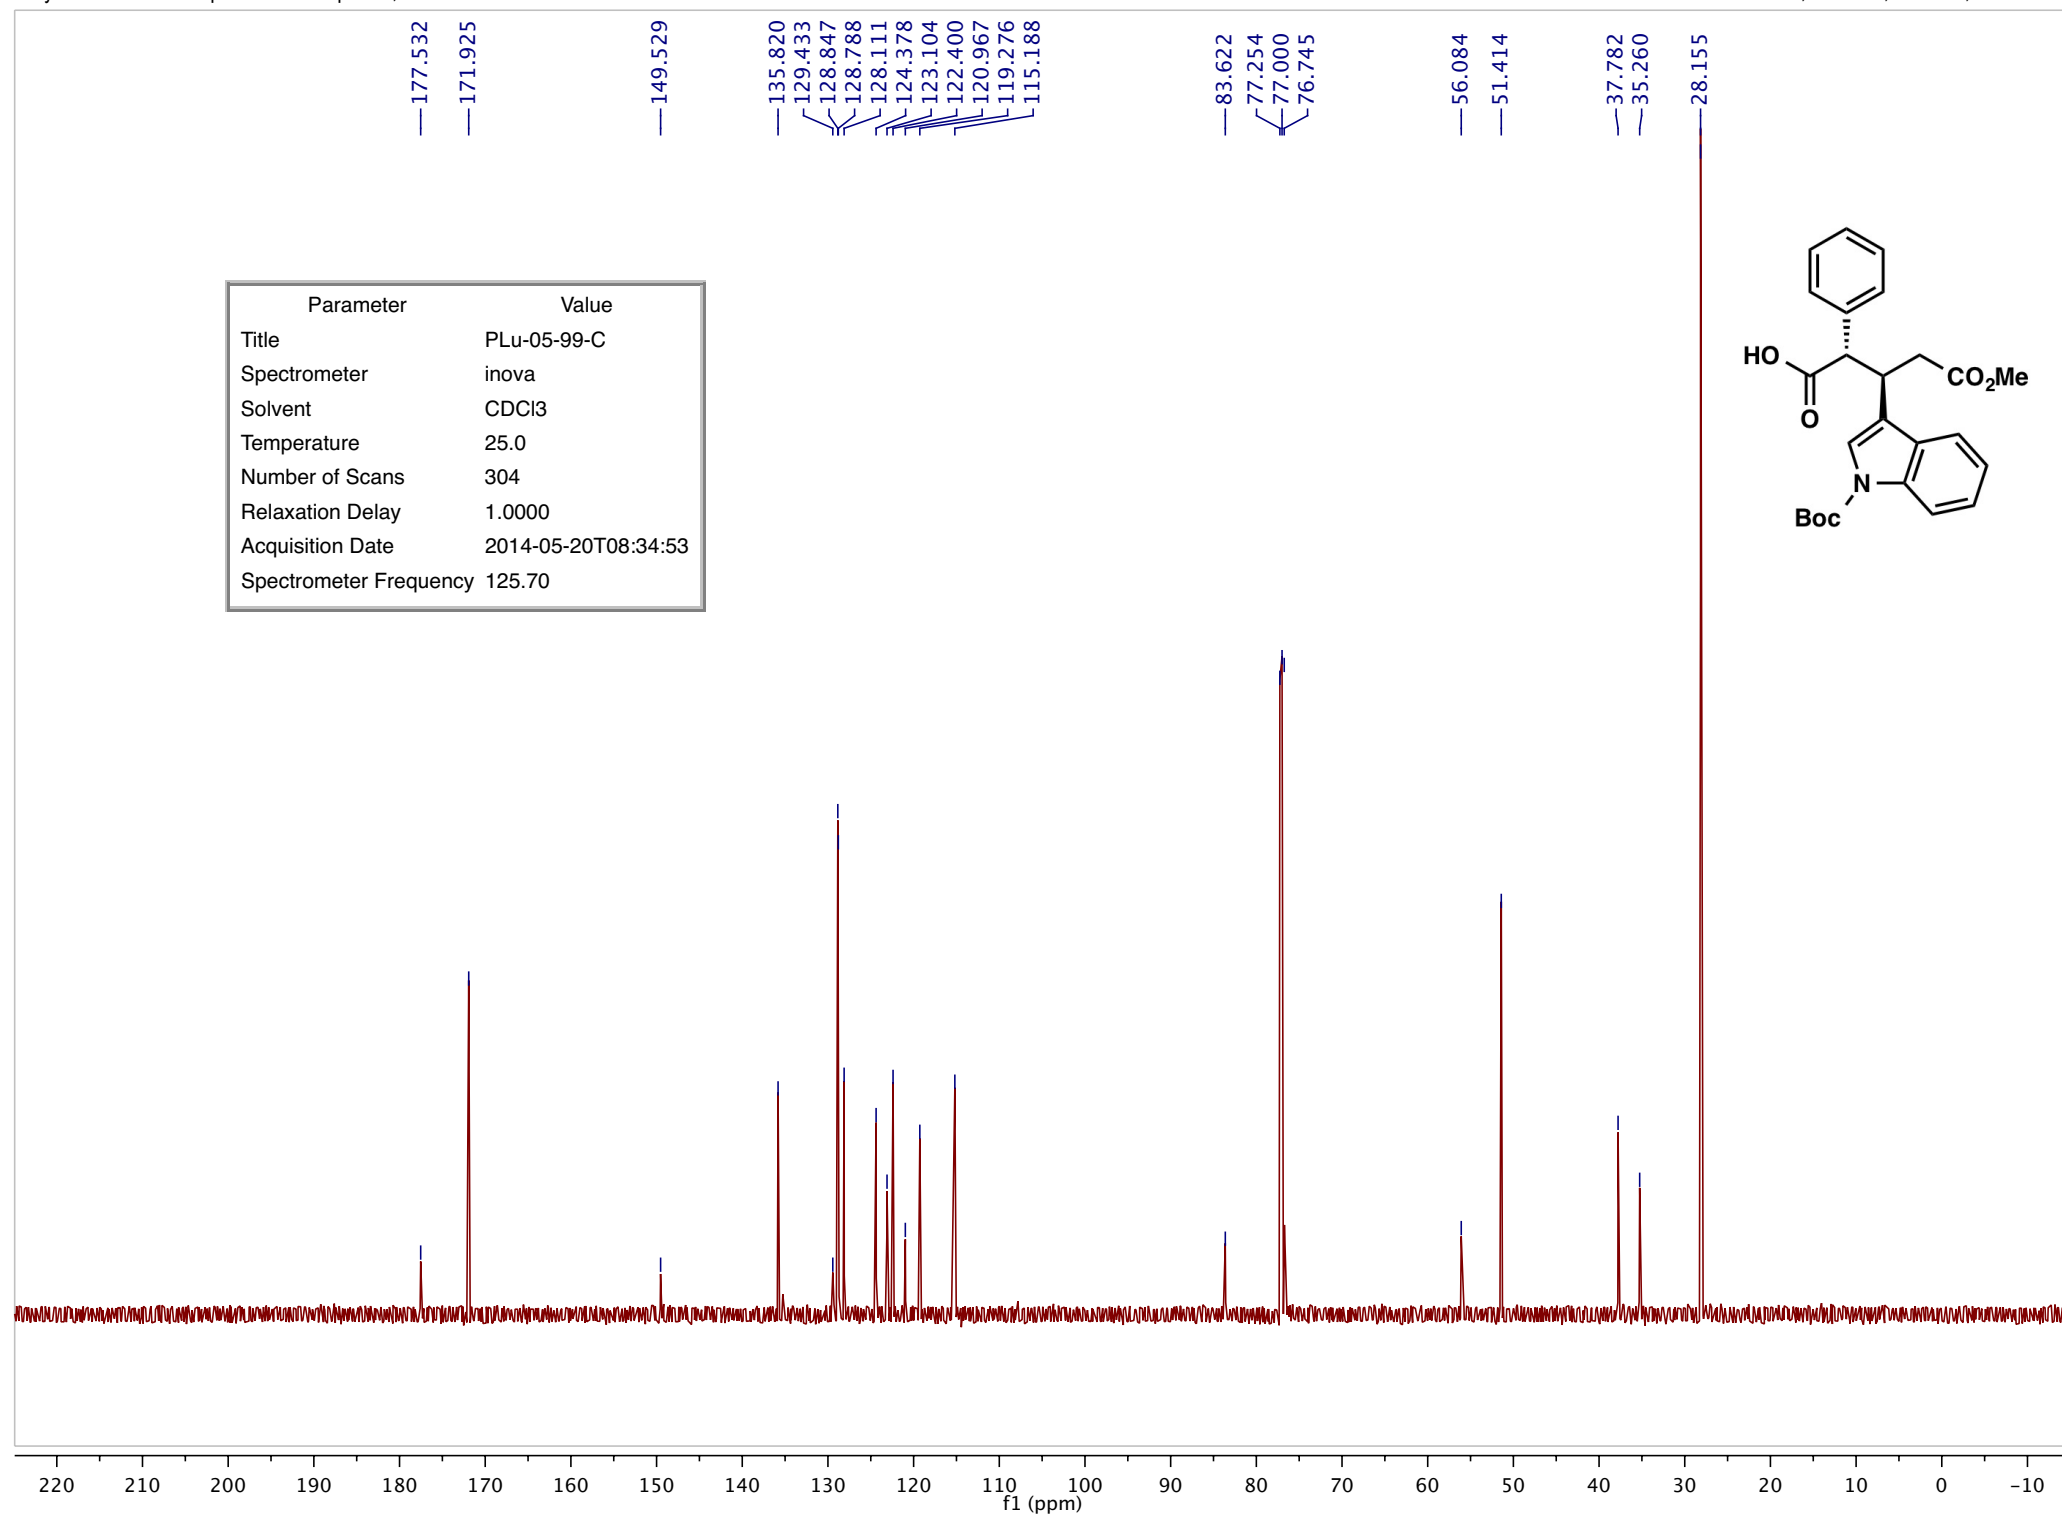

| Parameter              | Value               |
|------------------------|---------------------|
| Title                  | PLu-05-99Me         |
| Spectrometer           | inova               |
| Solvent                | CDCl <sub>3</sub>   |
| Temperature            | 25.0                |
| Number of Scans        | 16                  |
| Relaxation Delay       | 4.8000              |
| Acquisition Date       | 2014-05-21T08:45:42 |
| Spectrometer Frequency | 499.86              |

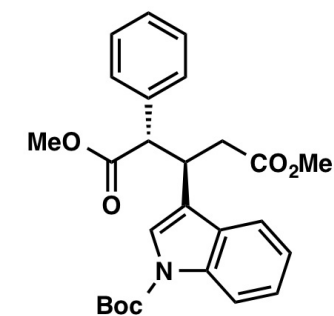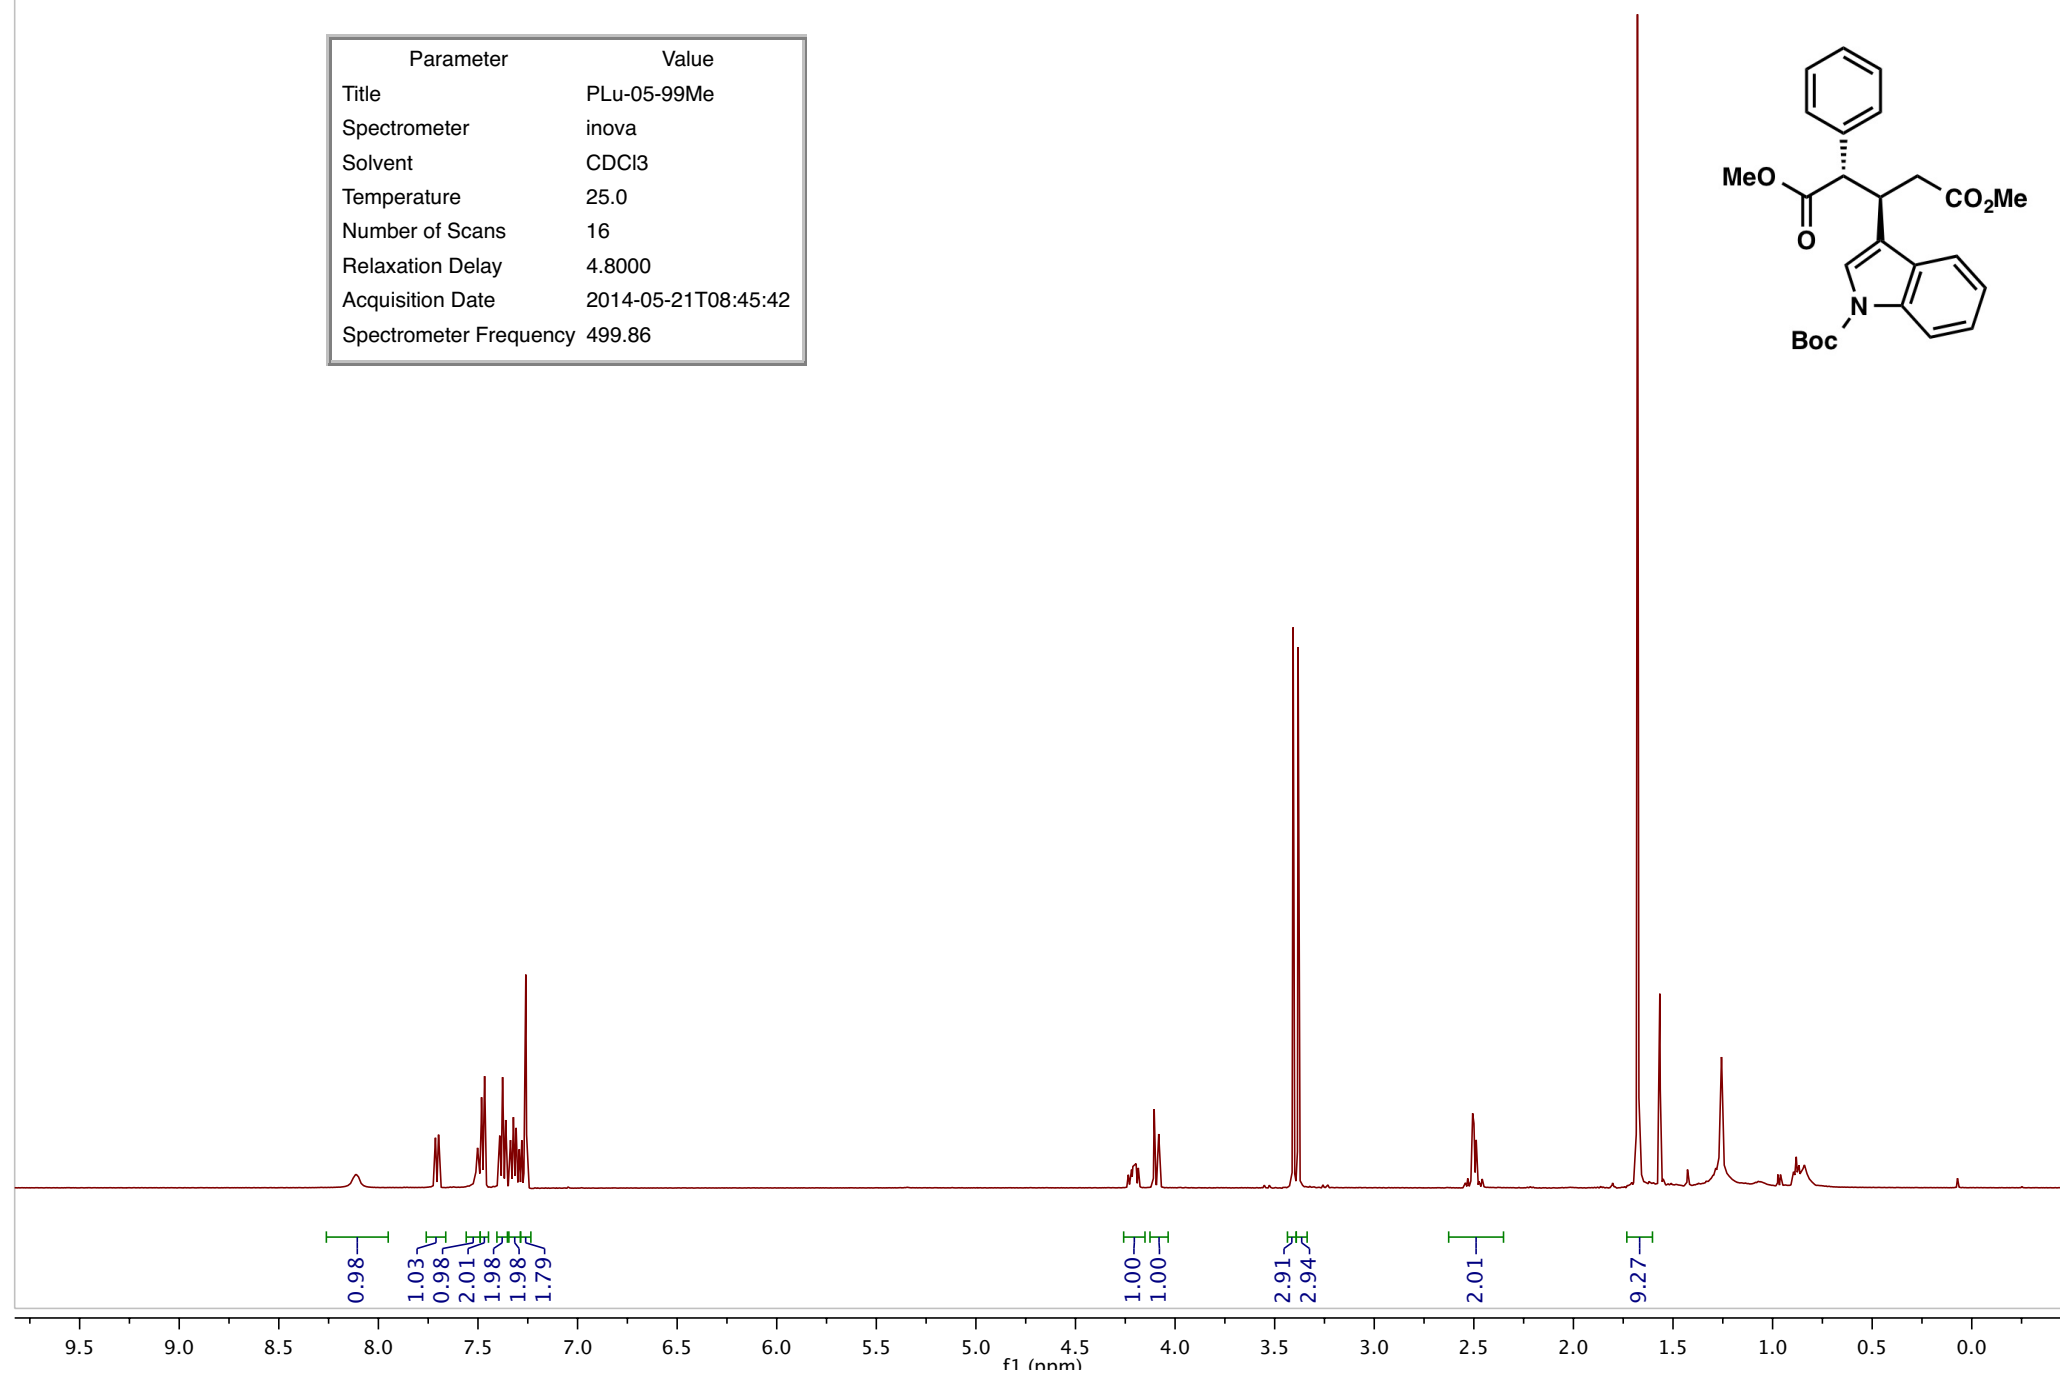



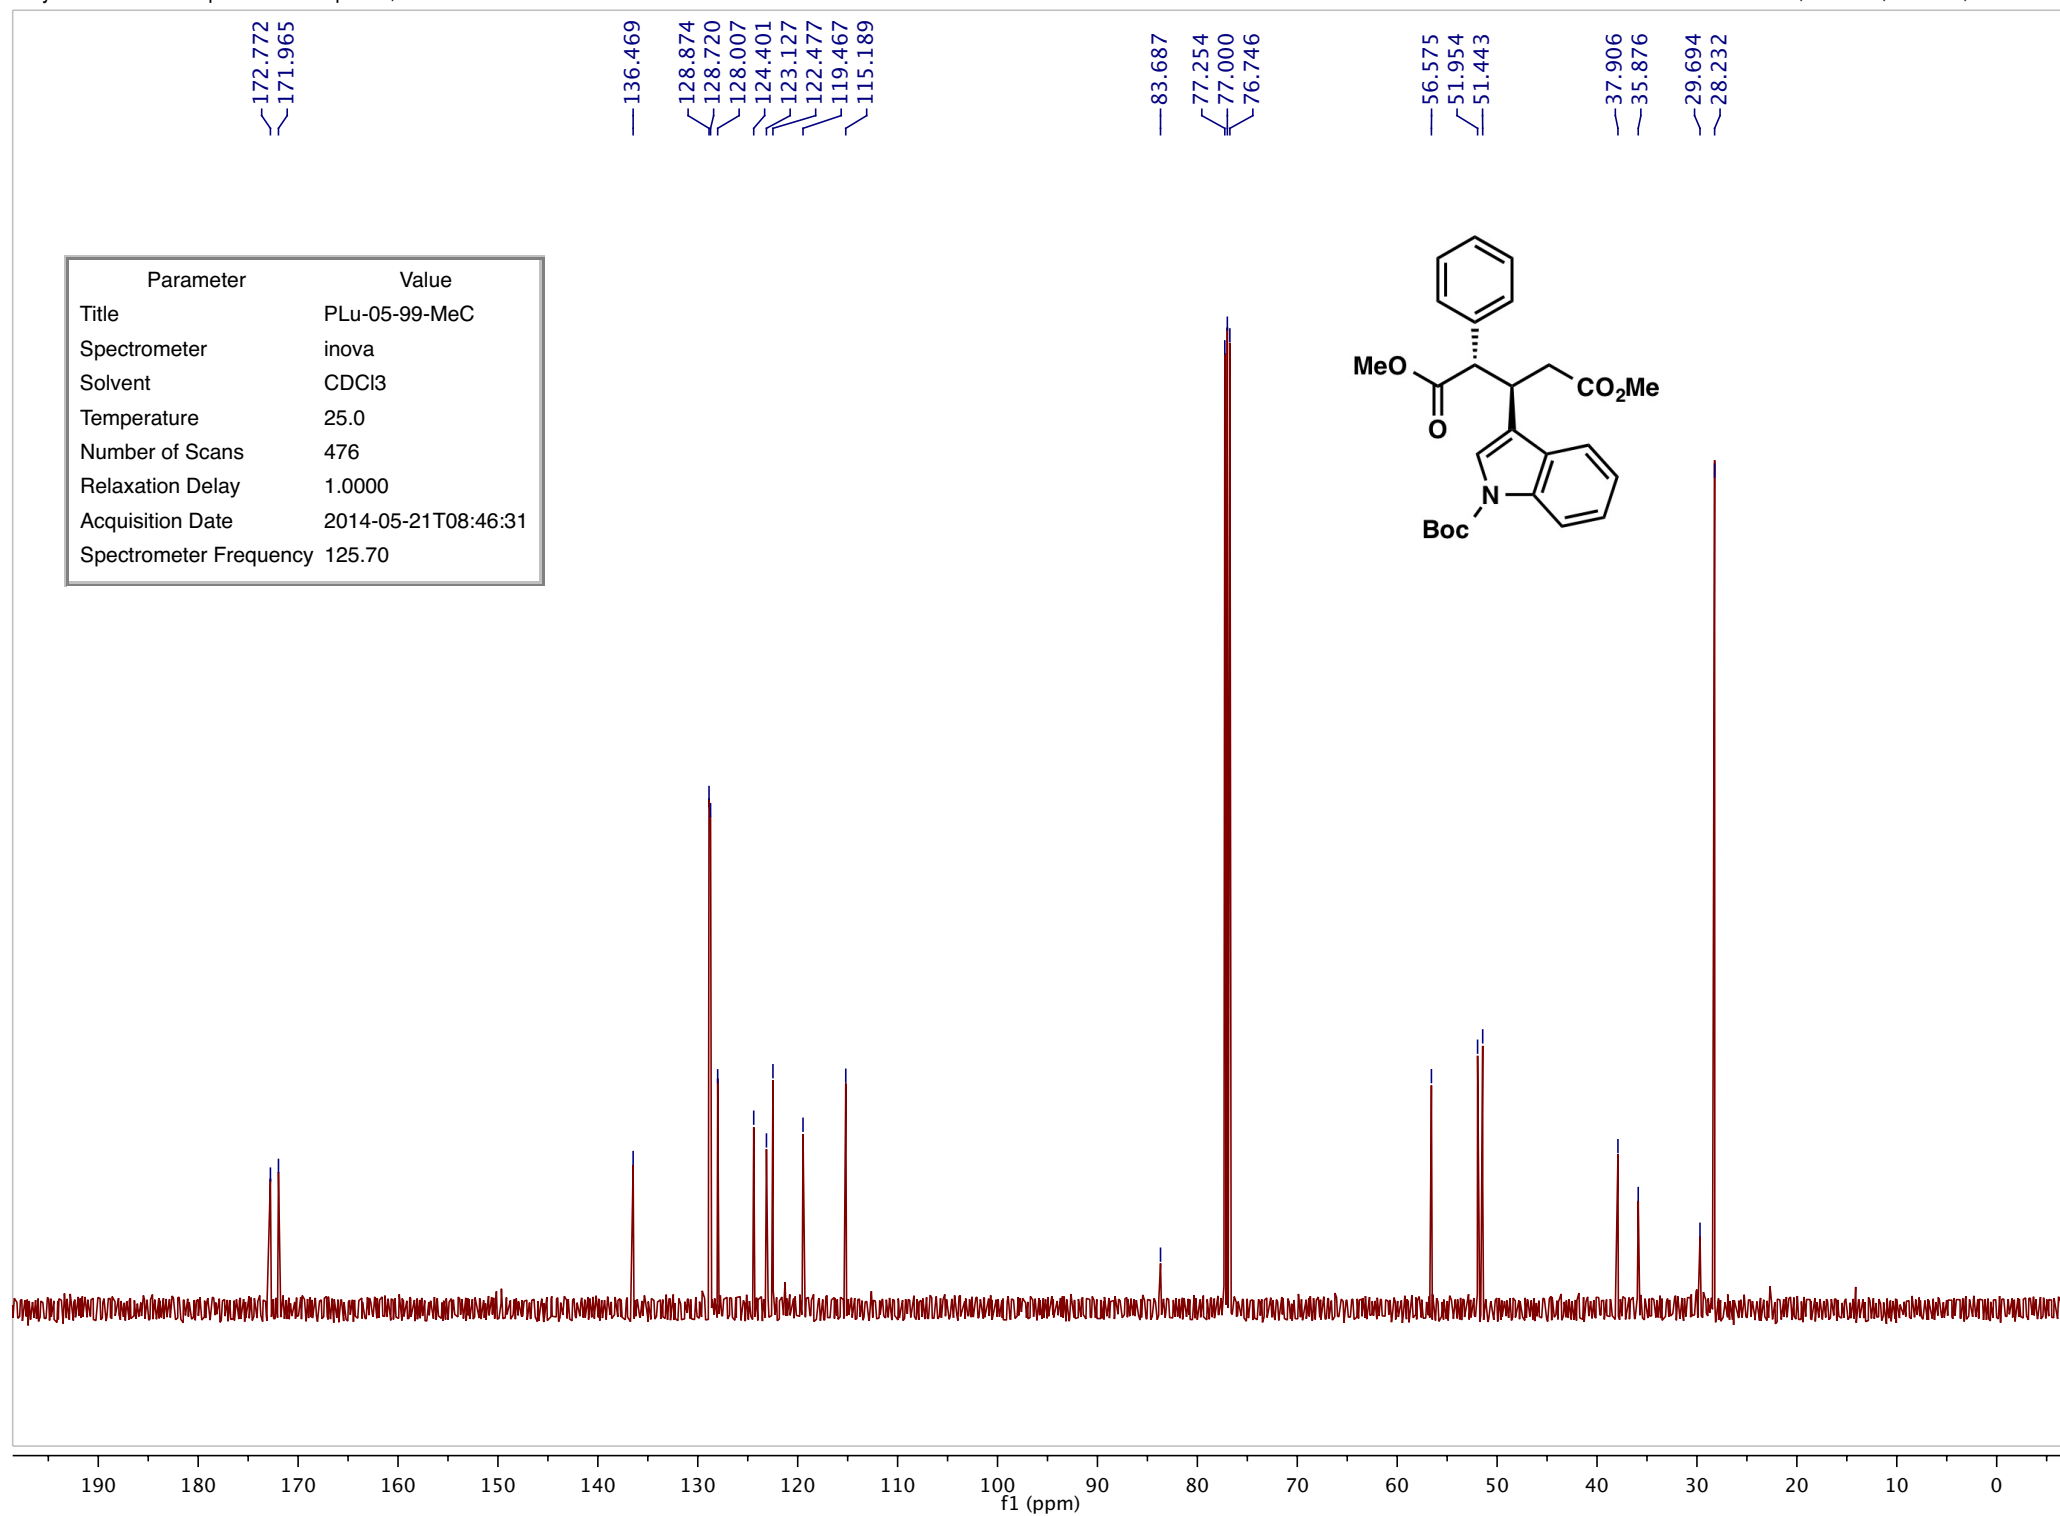

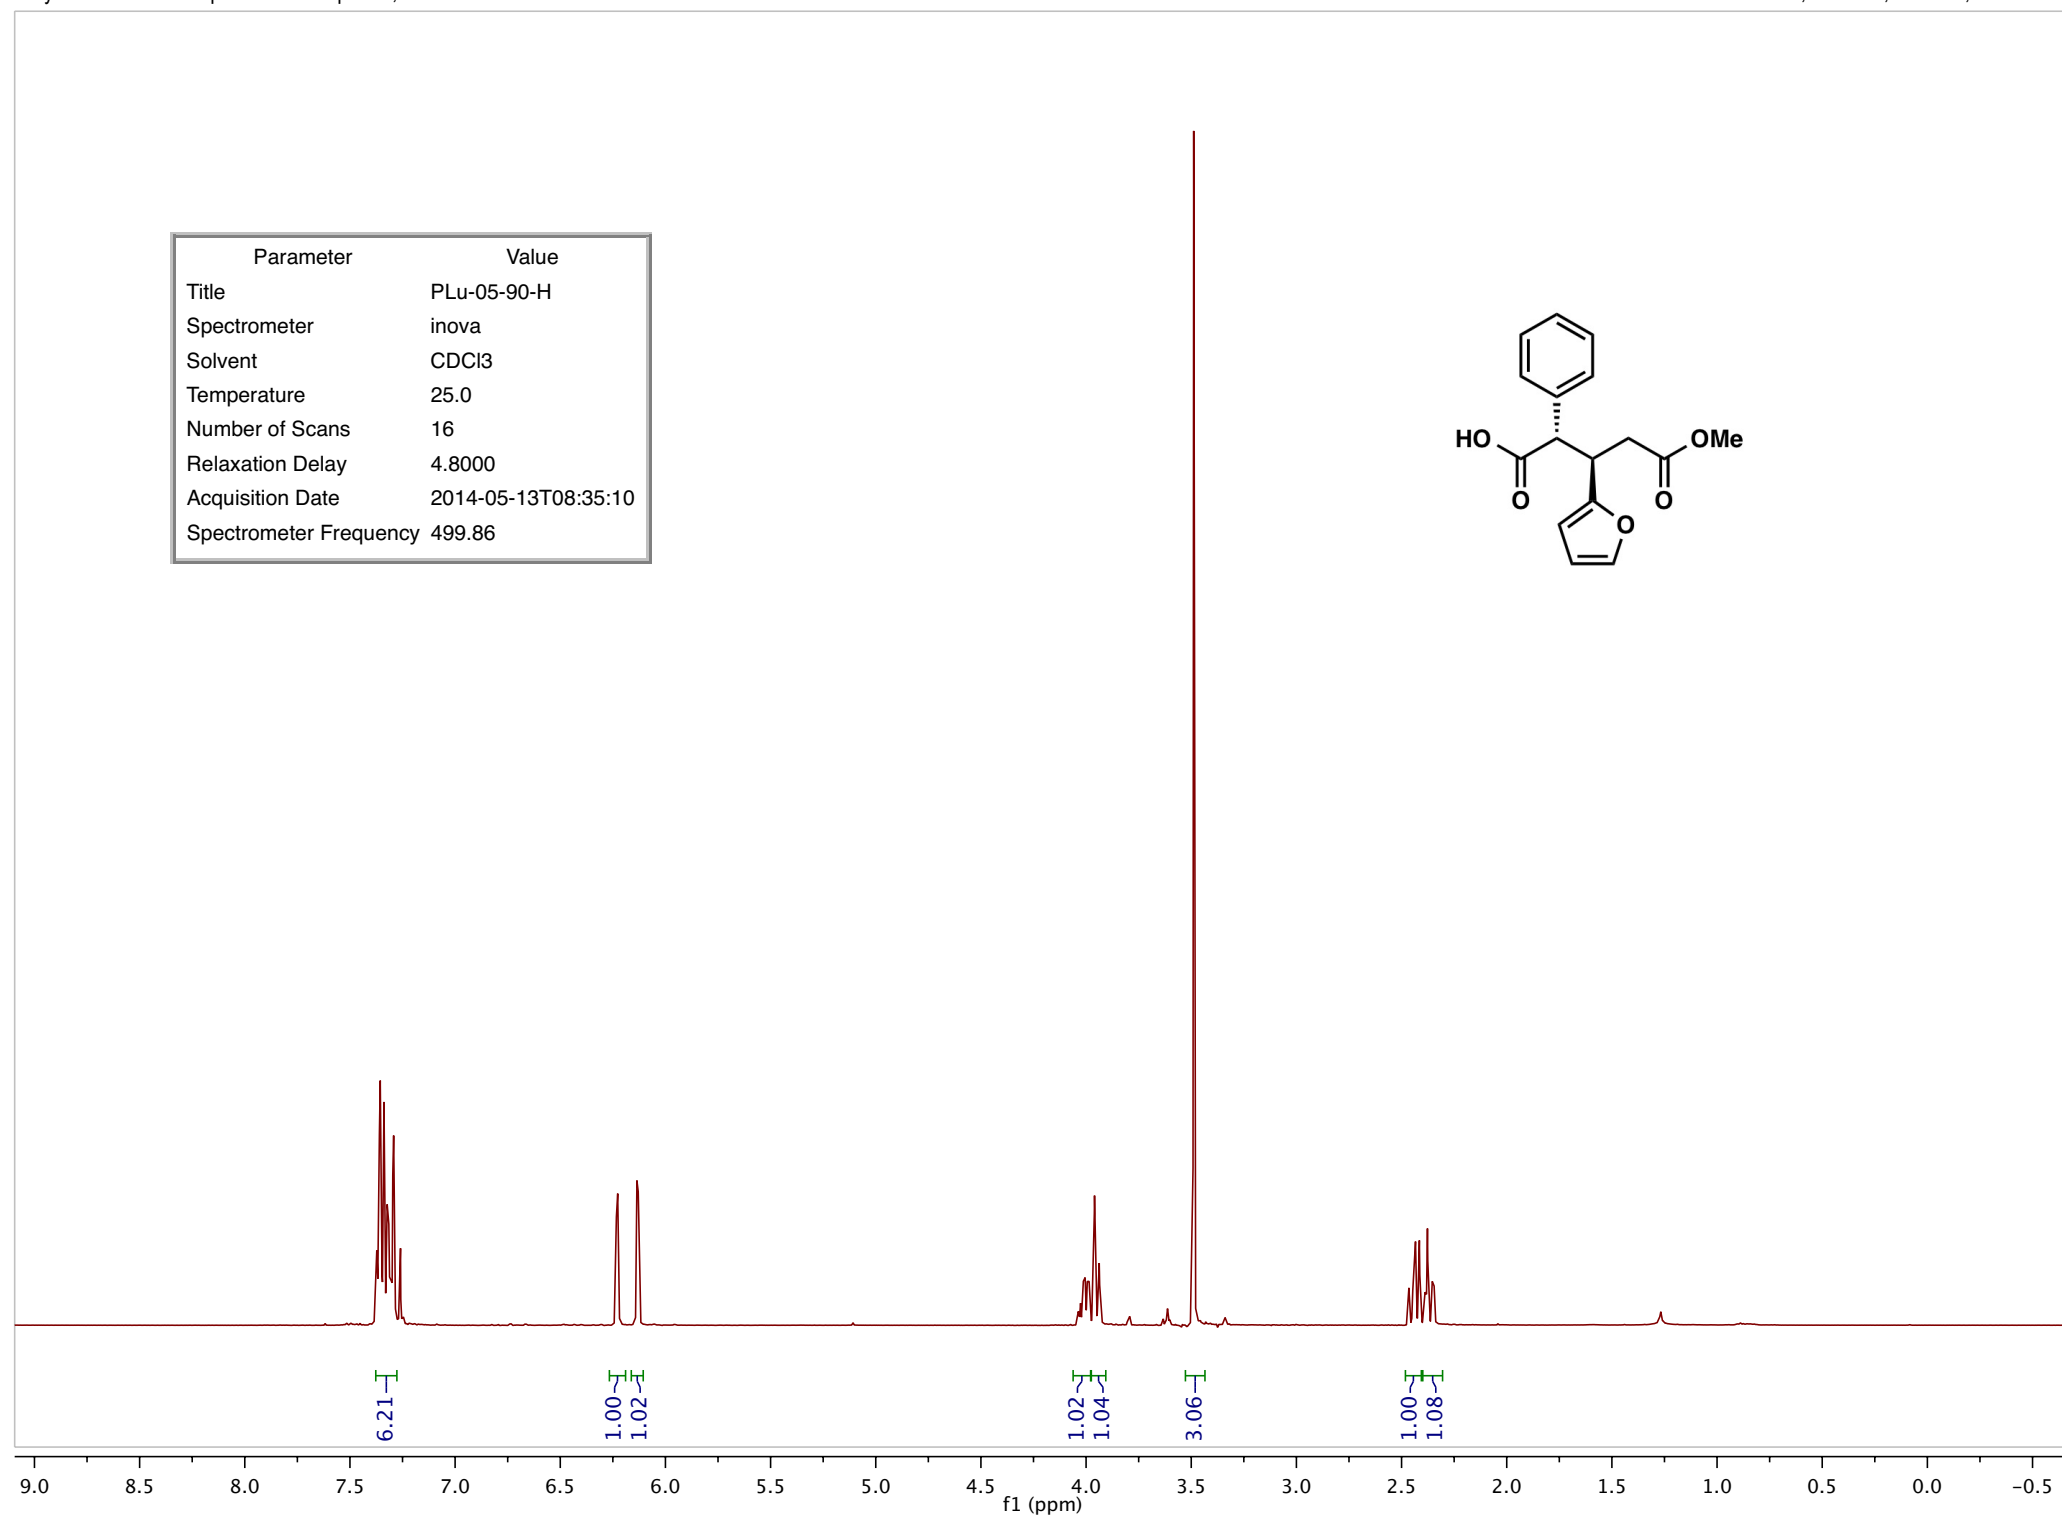

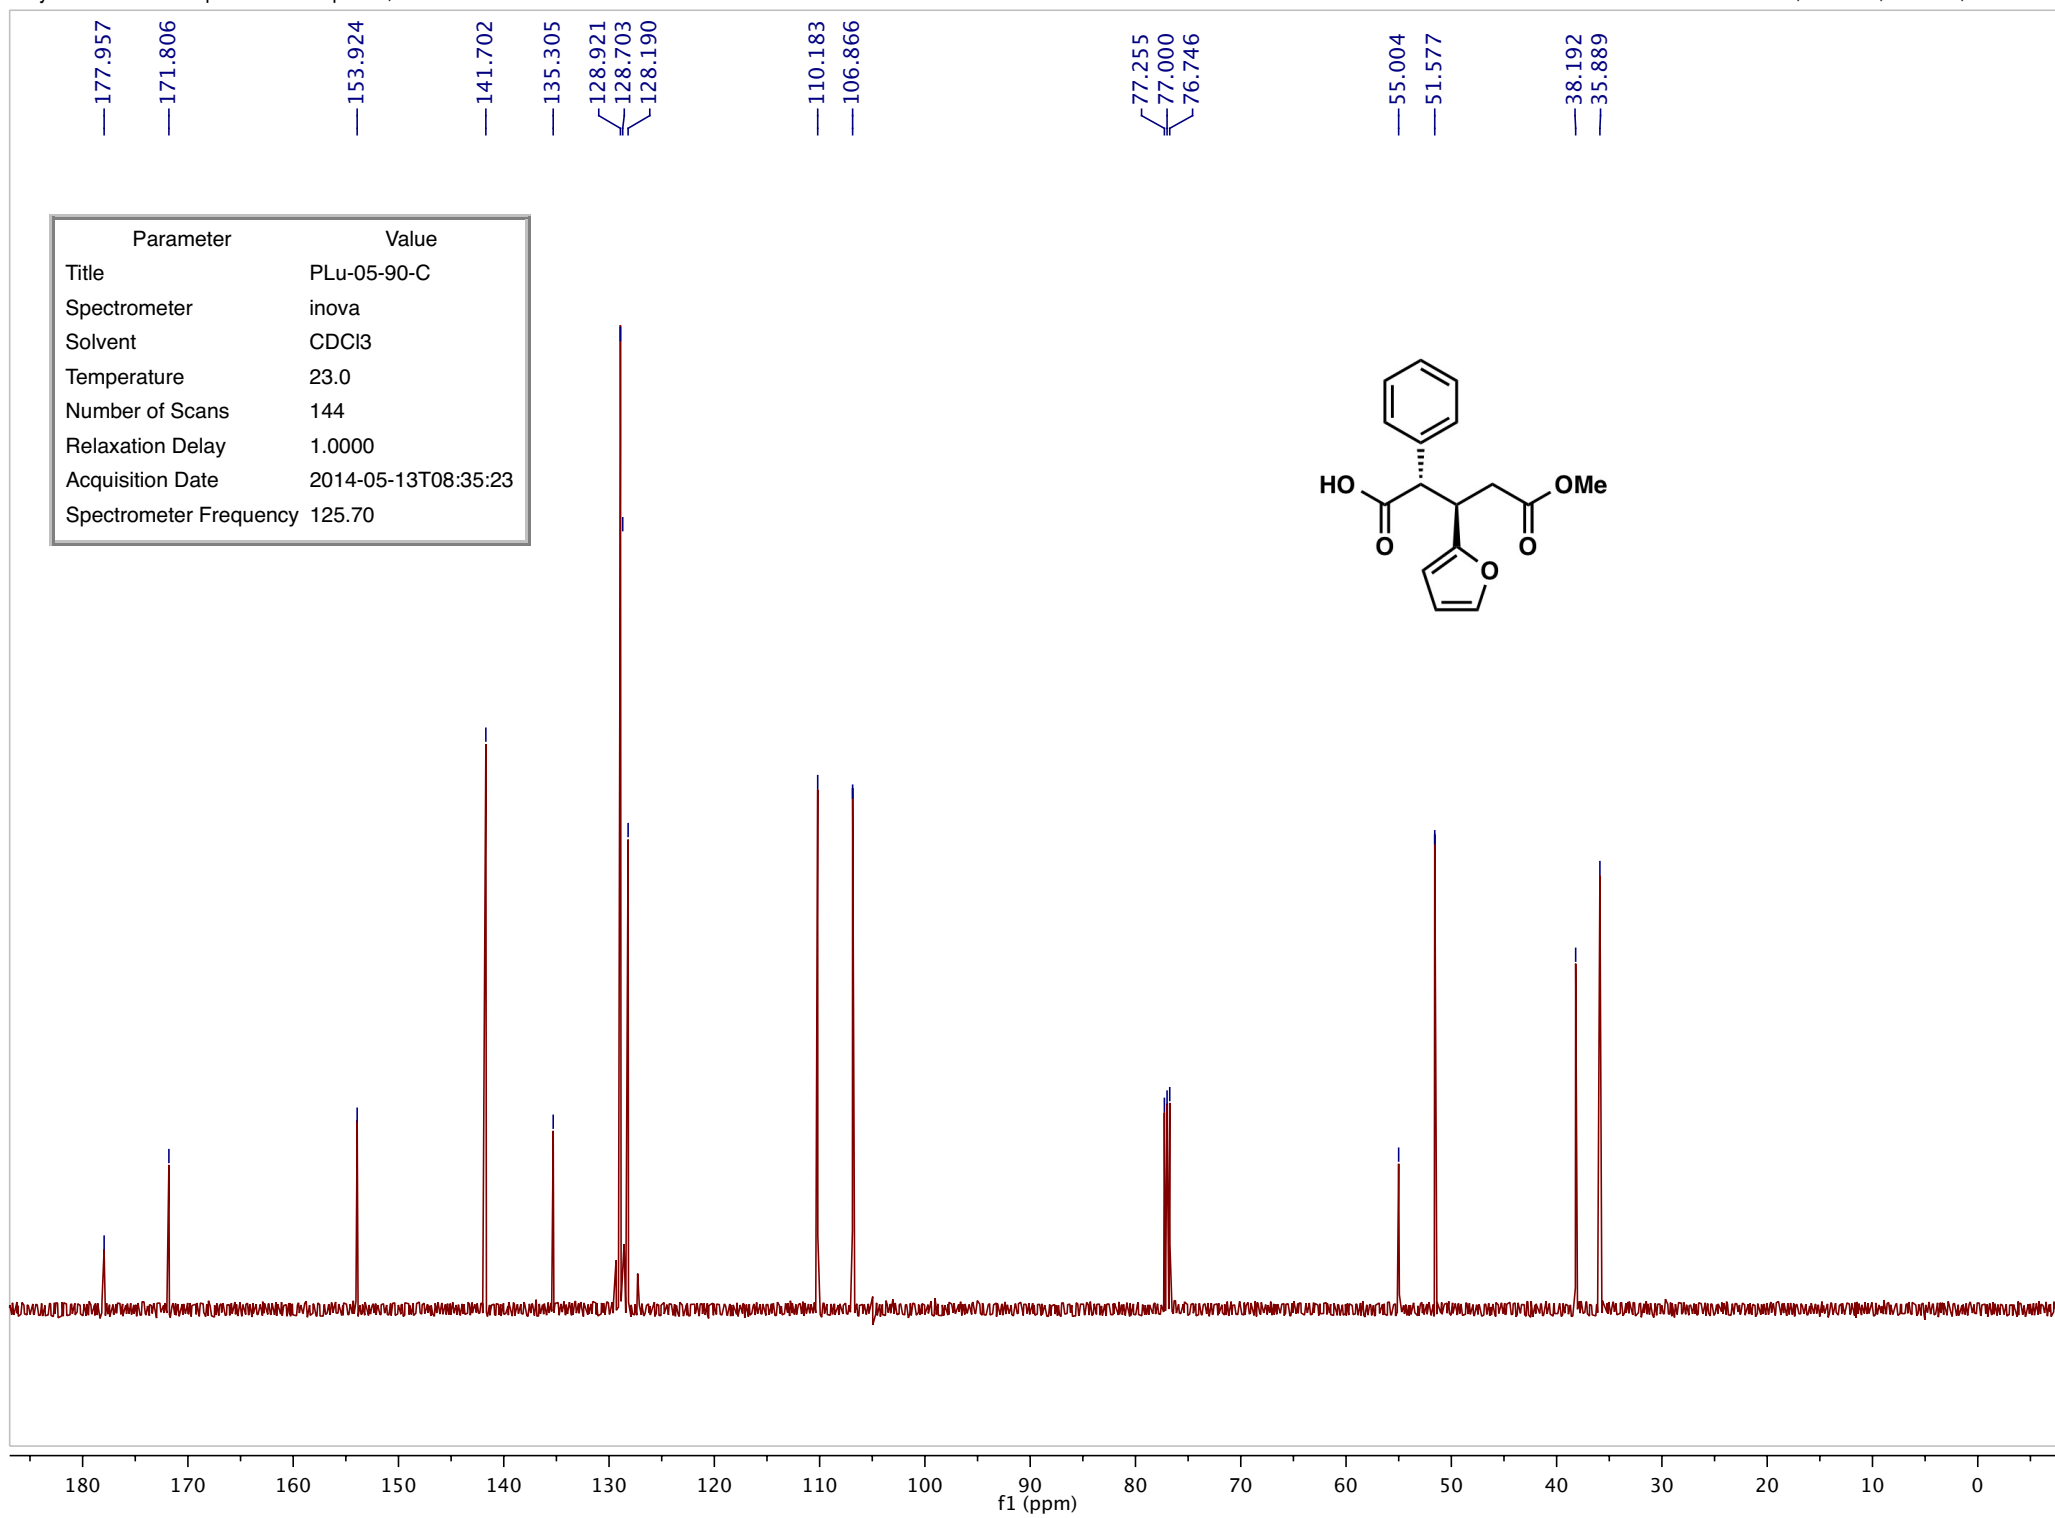

| Parameter              | Value               |
|------------------------|---------------------|
| Title                  | PLu-05-90-MeH       |
| Spectrometer           | inova               |
| Solvent                | CDCl <sub>3</sub>   |
| Temperature            | 25.0                |
| Number of Scans        | 12                  |
| Relaxation Delay       | 4.8000              |
| Acquisition Date       | 2014-05-14T08:51:29 |
| Spectrometer Frequency | 499.86              |

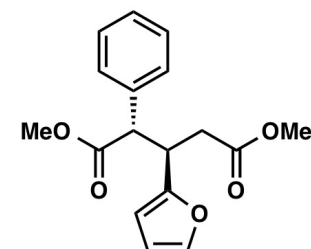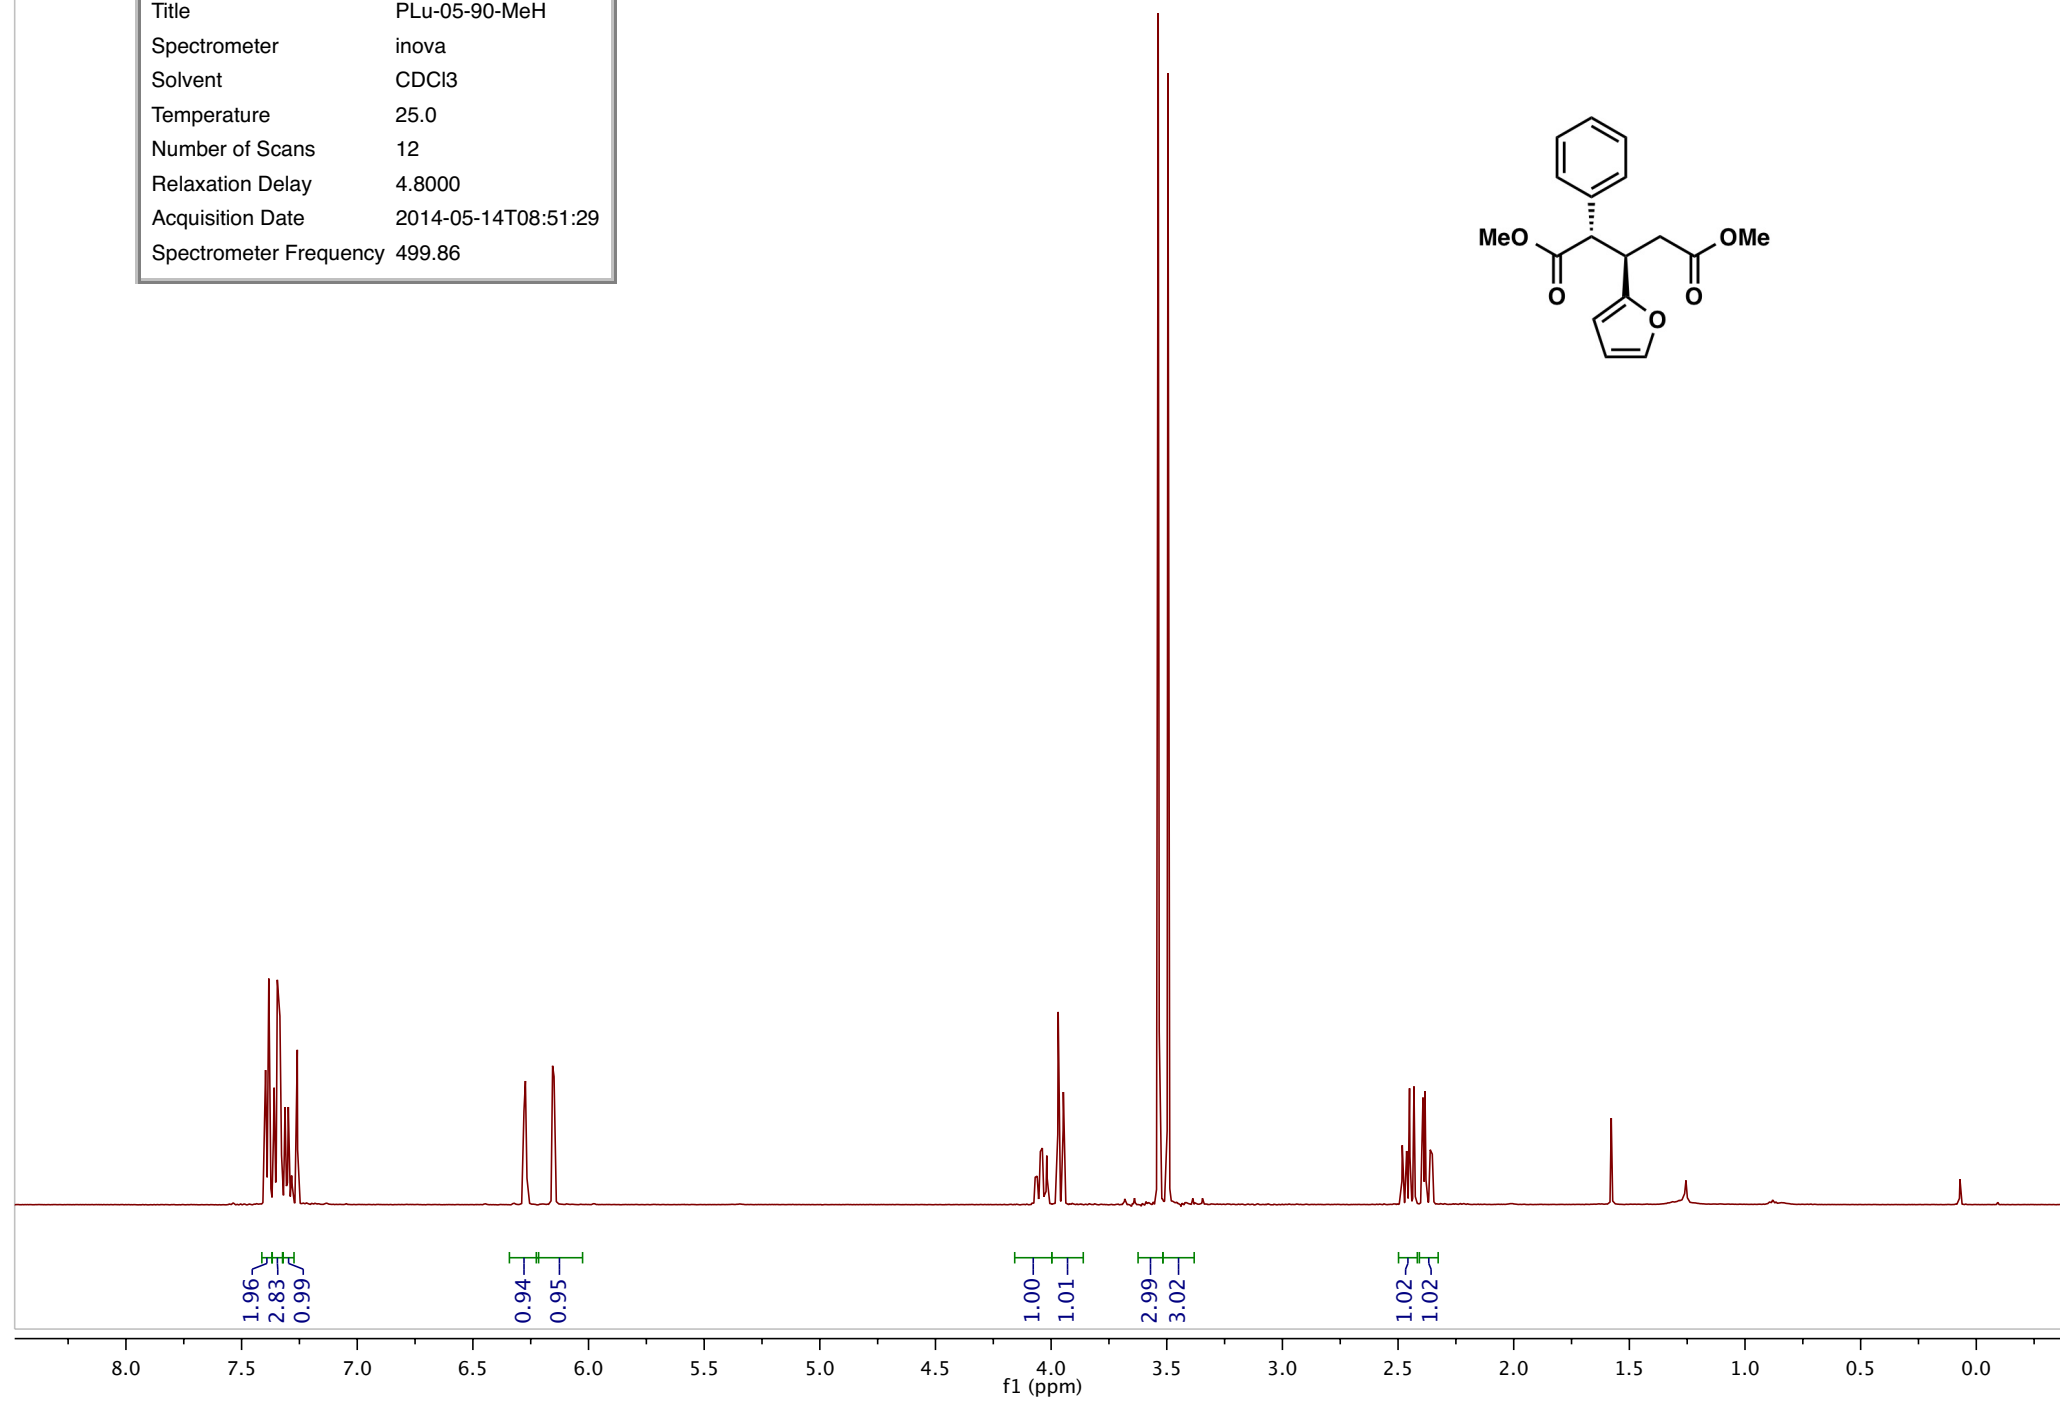

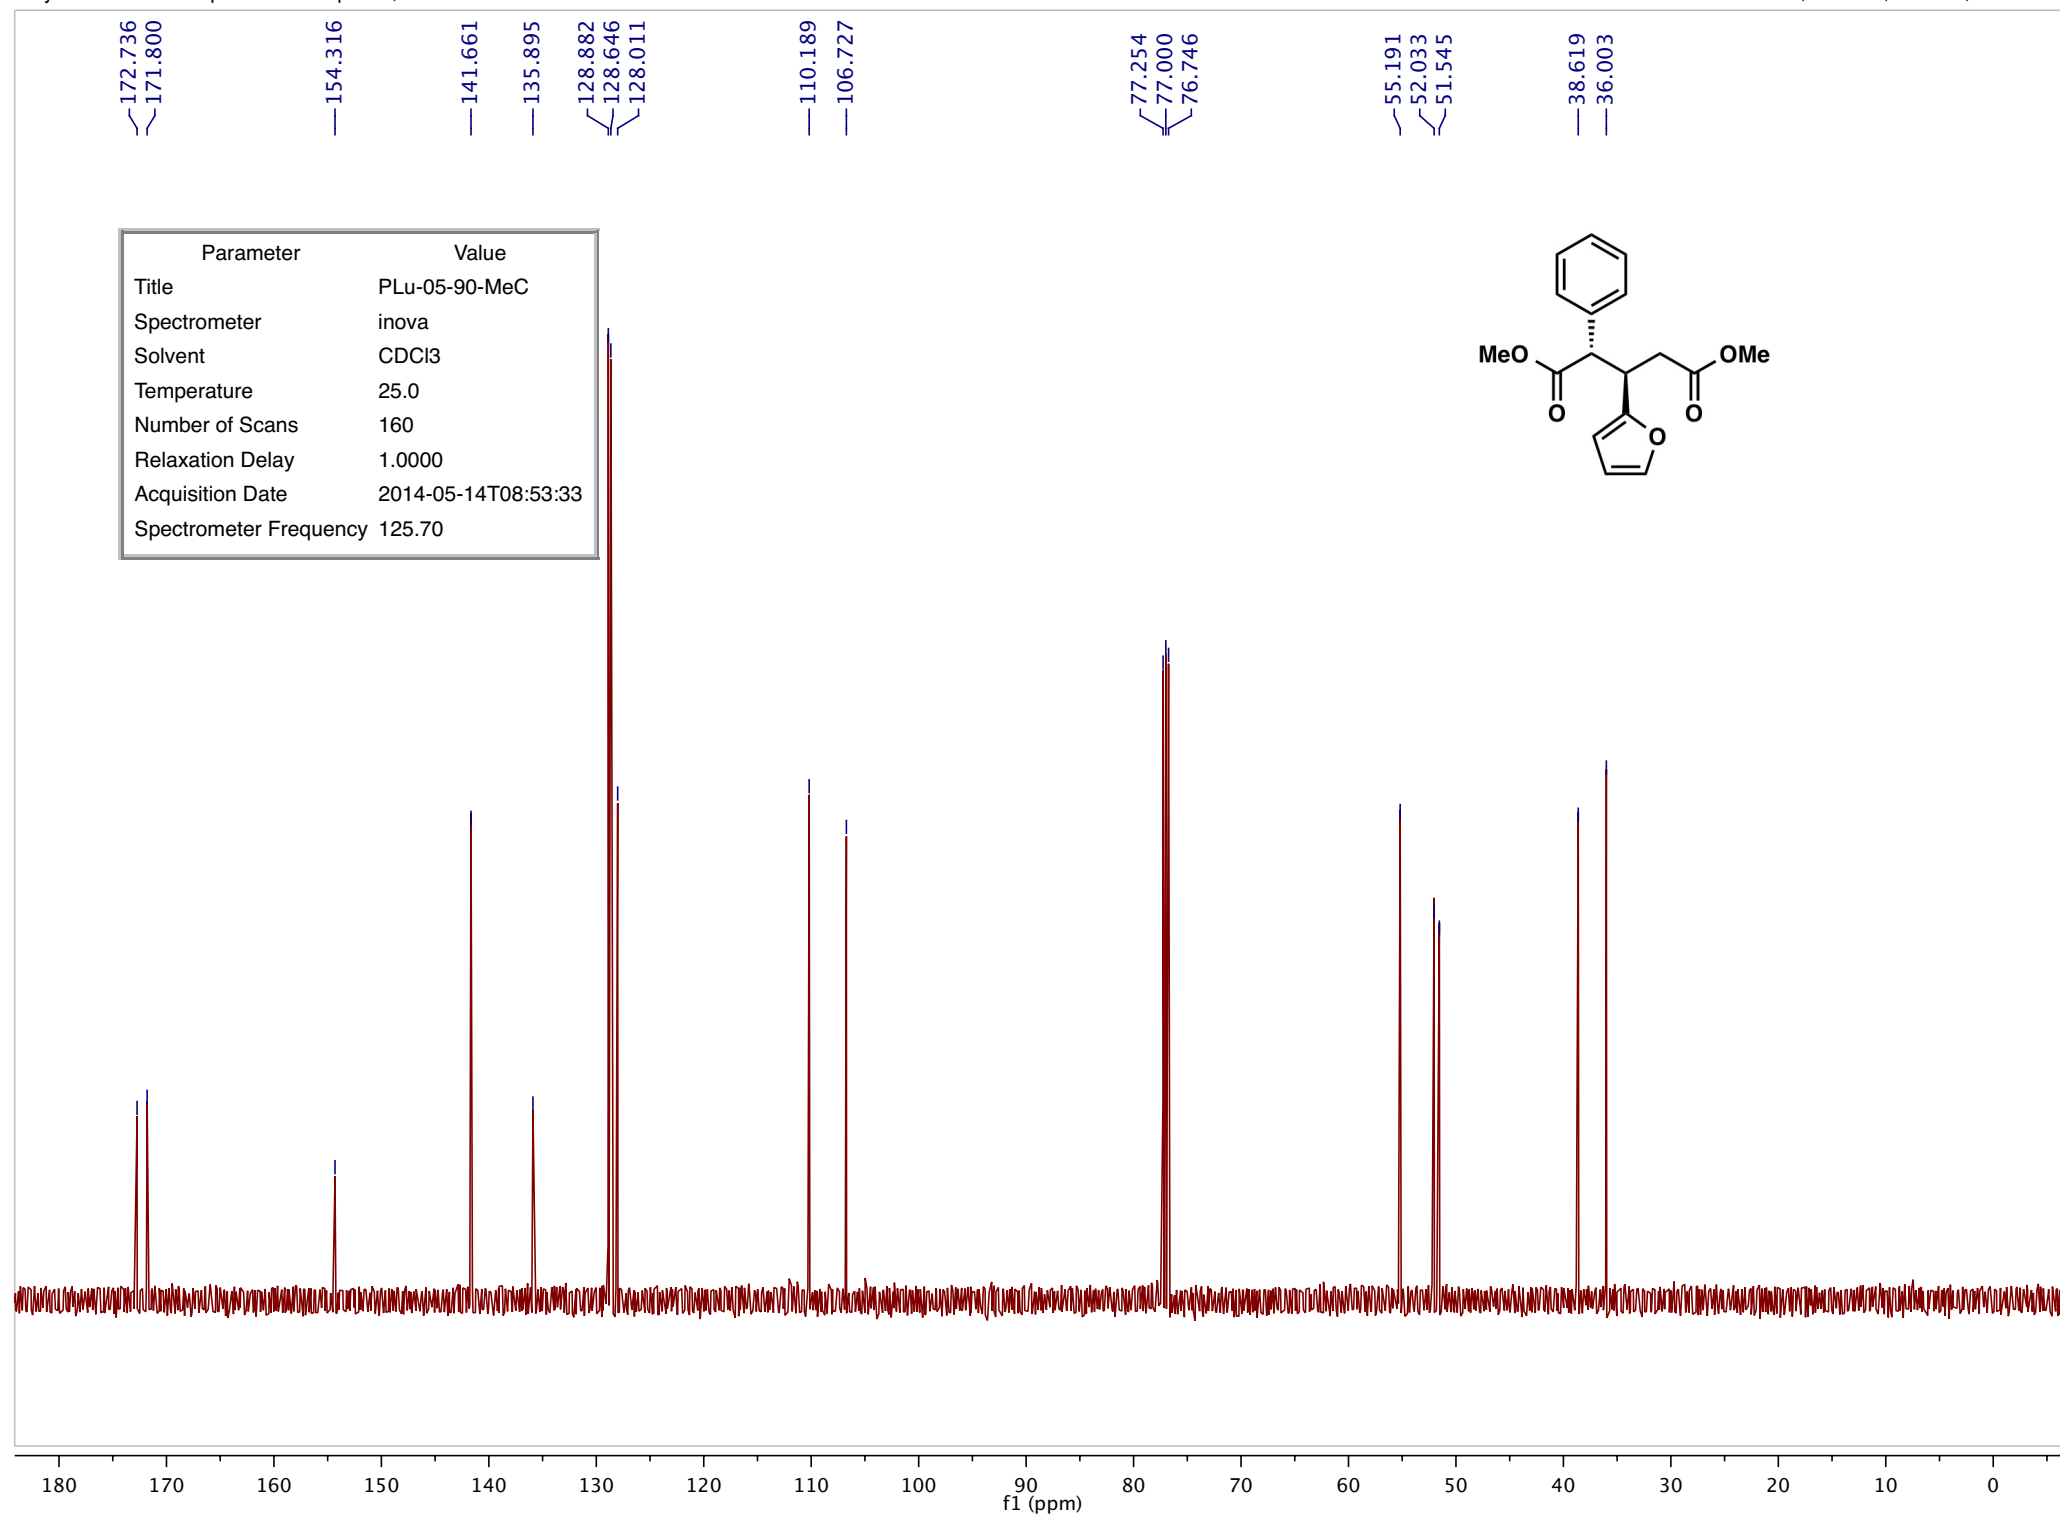

| Parameter              | Value               |
|------------------------|---------------------|
| Title                  | jjj-5-071-a-a-1     |
| Spectrometer           | vnmrs               |
| Solvent                | cdcl3               |
| Temperature            | 26.0                |
| Number of Scans        | 52                  |
| Relaxation Delay       | 8.0000              |
| Acquisition Date       | 2014-10-20T16:32:46 |
| Spectrometer Frequency | 399.78              |

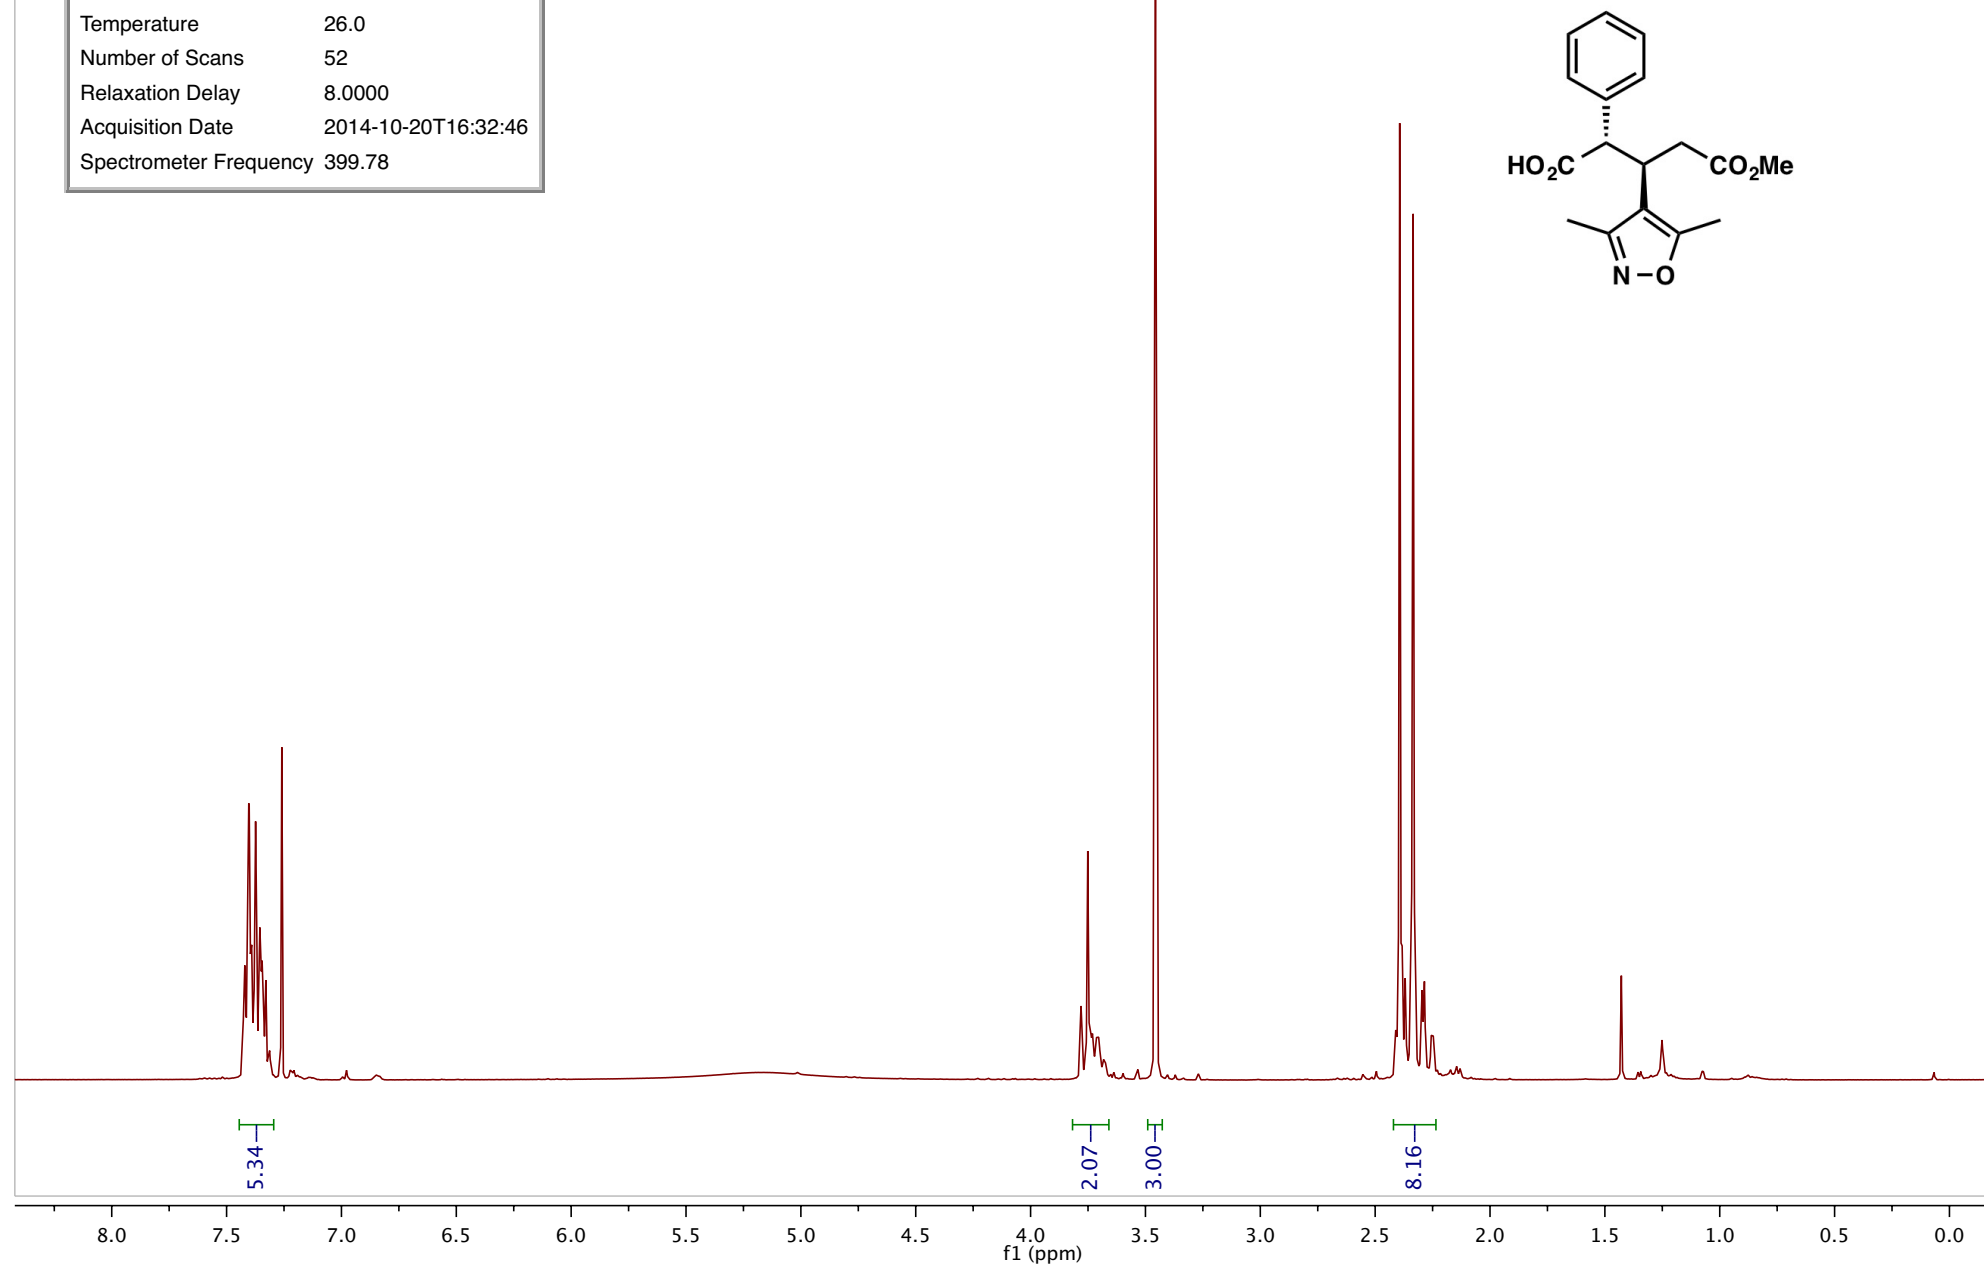

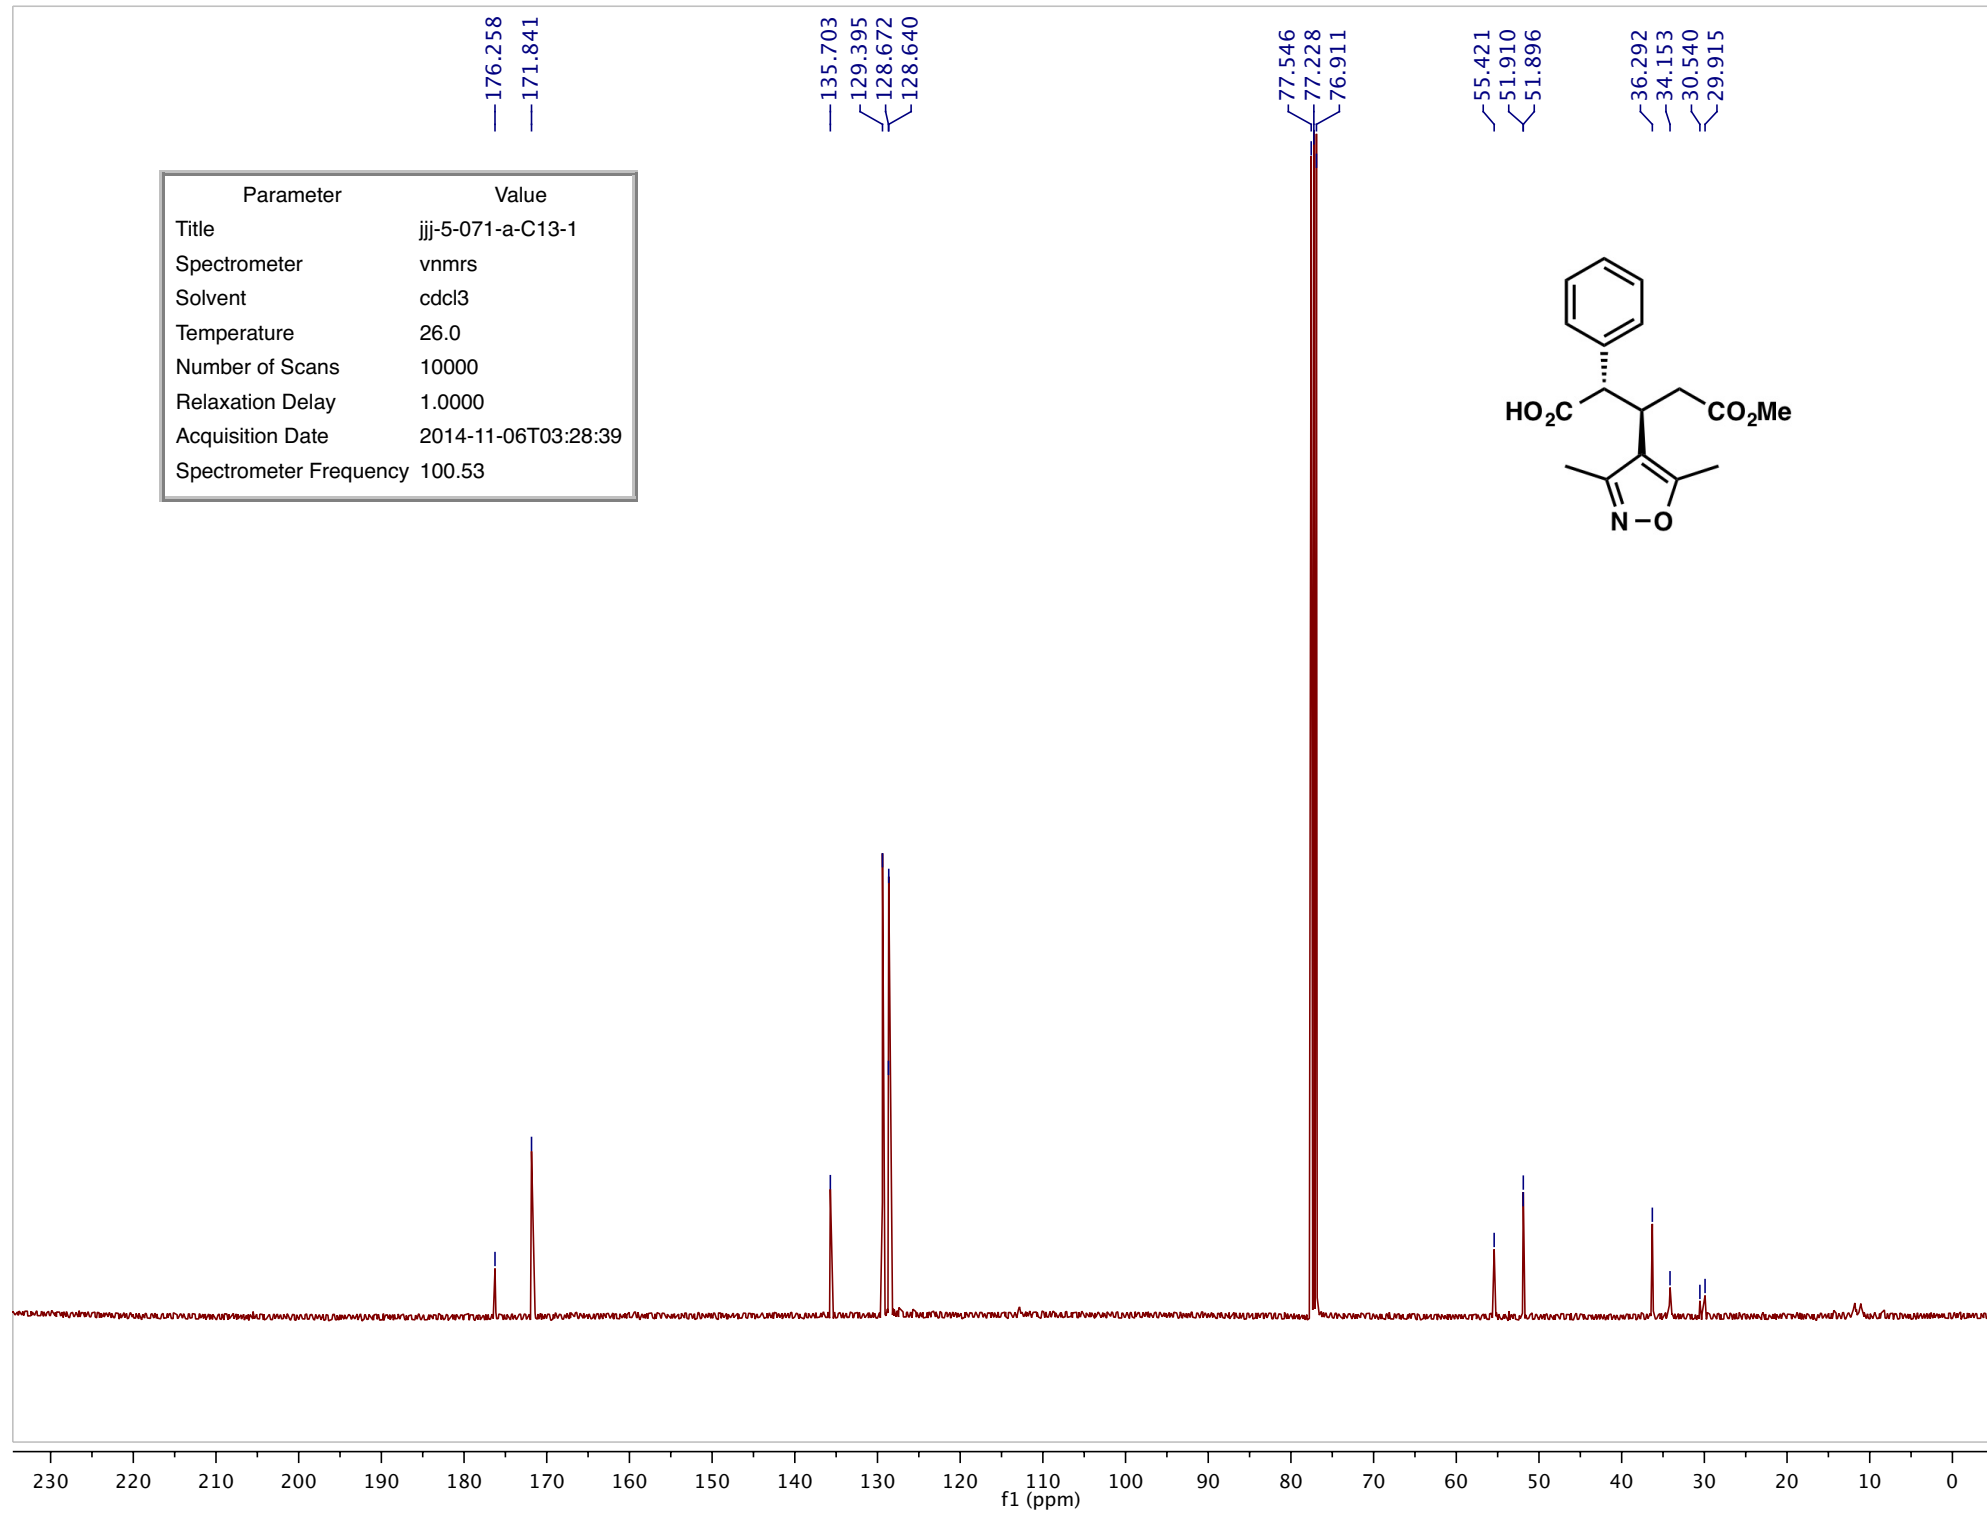

| Parameter              | Value (f2, f1)      |
|------------------------|---------------------|
| Title                  | jij-5-071-a-a-HMBC  |
| Spectrometer           | inova               |
| Solvent                | cdcl3               |
| Temperature            | 25.0                |
| Number of Scans        | 8                   |
| Relaxation Delay       | 1.0000              |
| Acquisition Date       | 2014-11-19T08:57:53 |
| Spectrometer Frequency | (599.63, 150.79)    |
| Nucleus                | (1H, 13C)           |

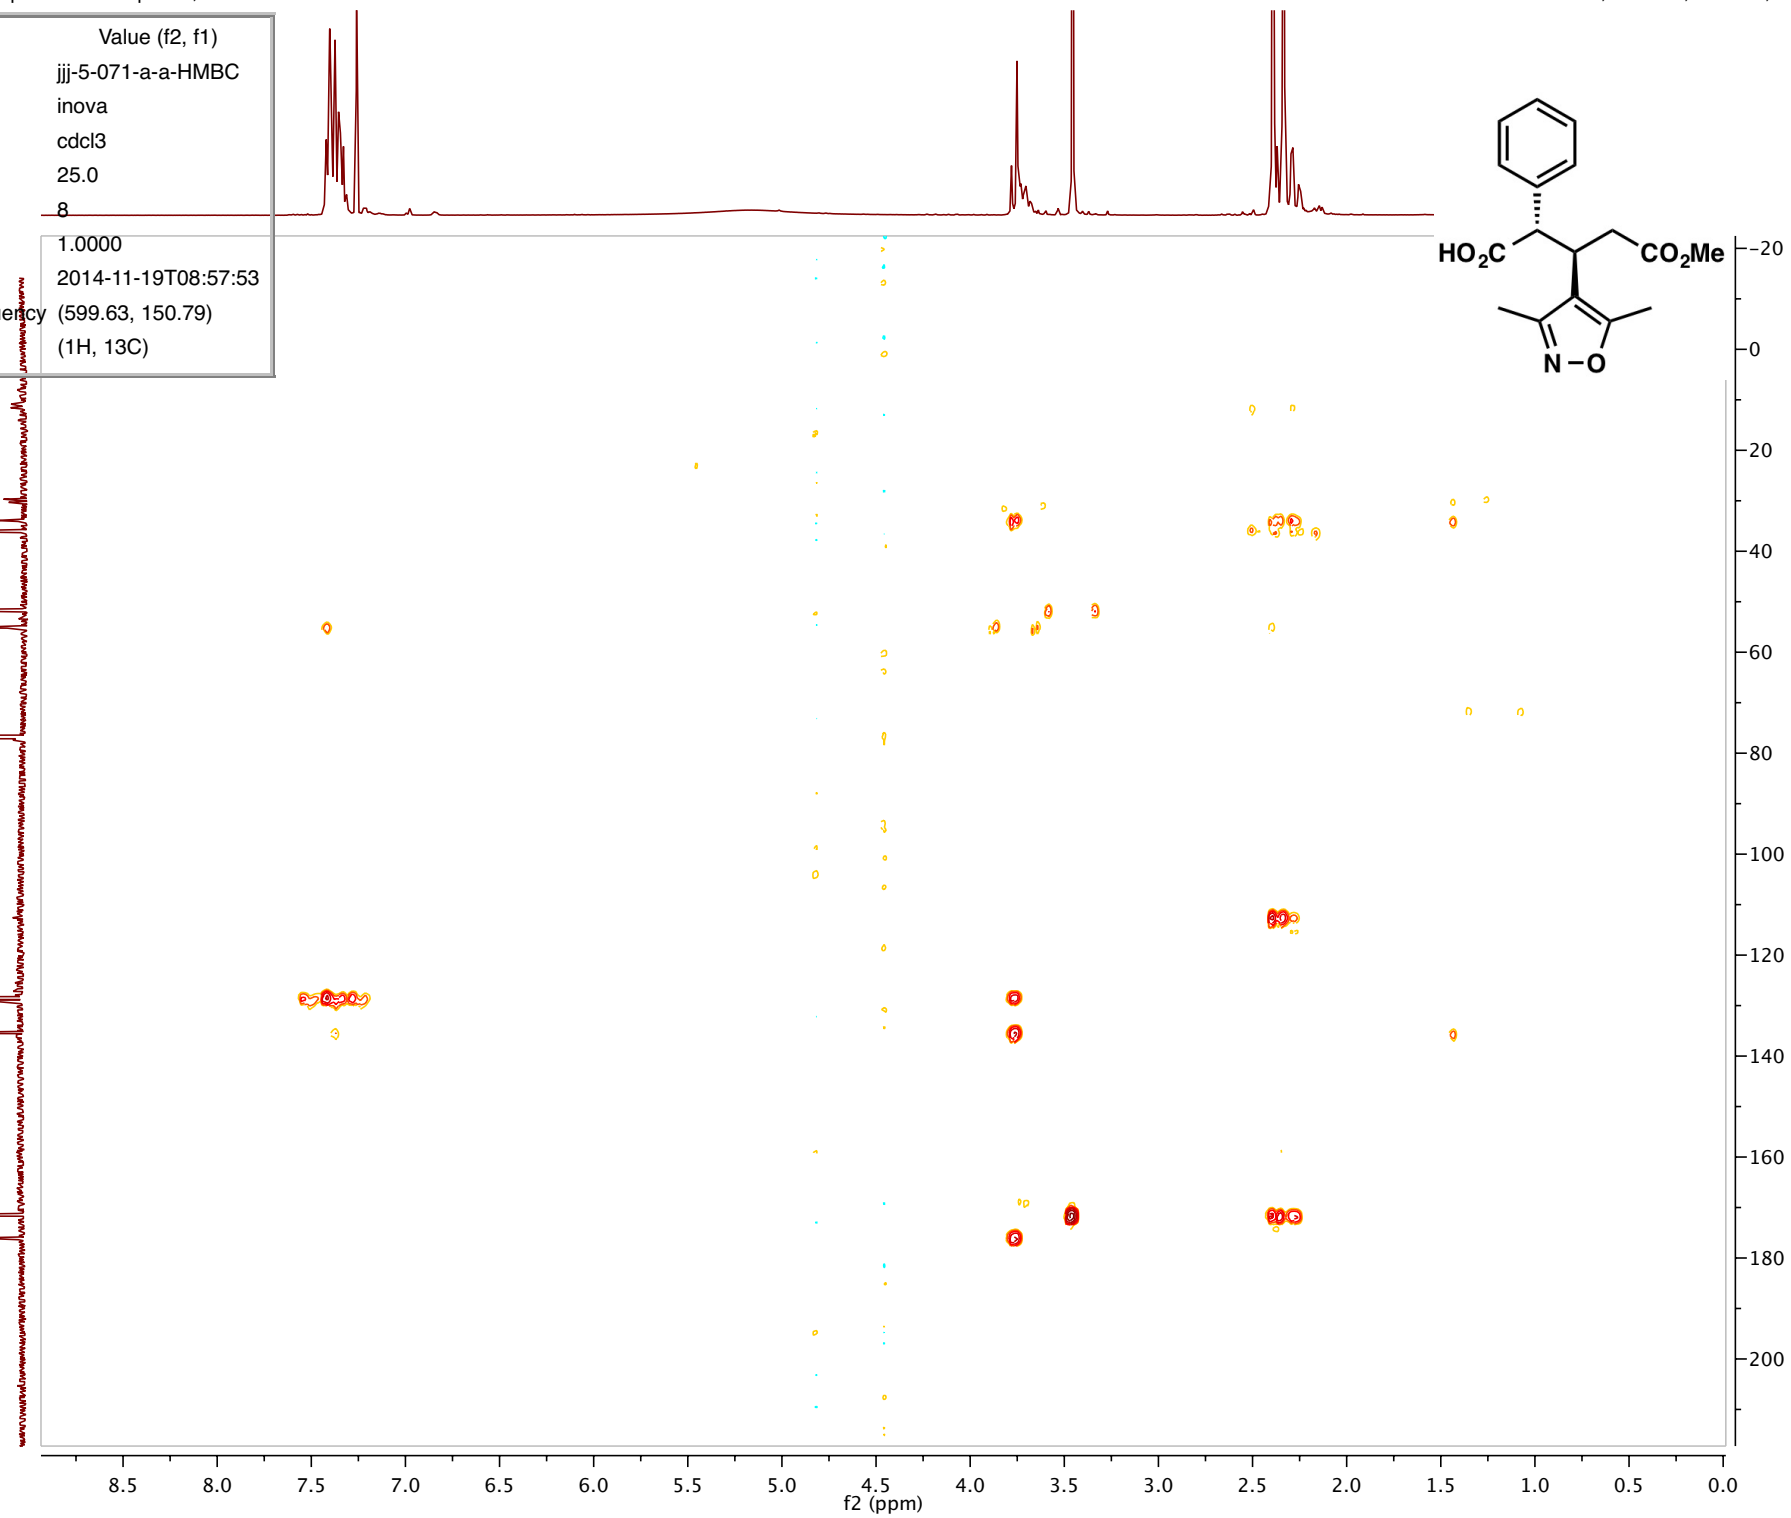



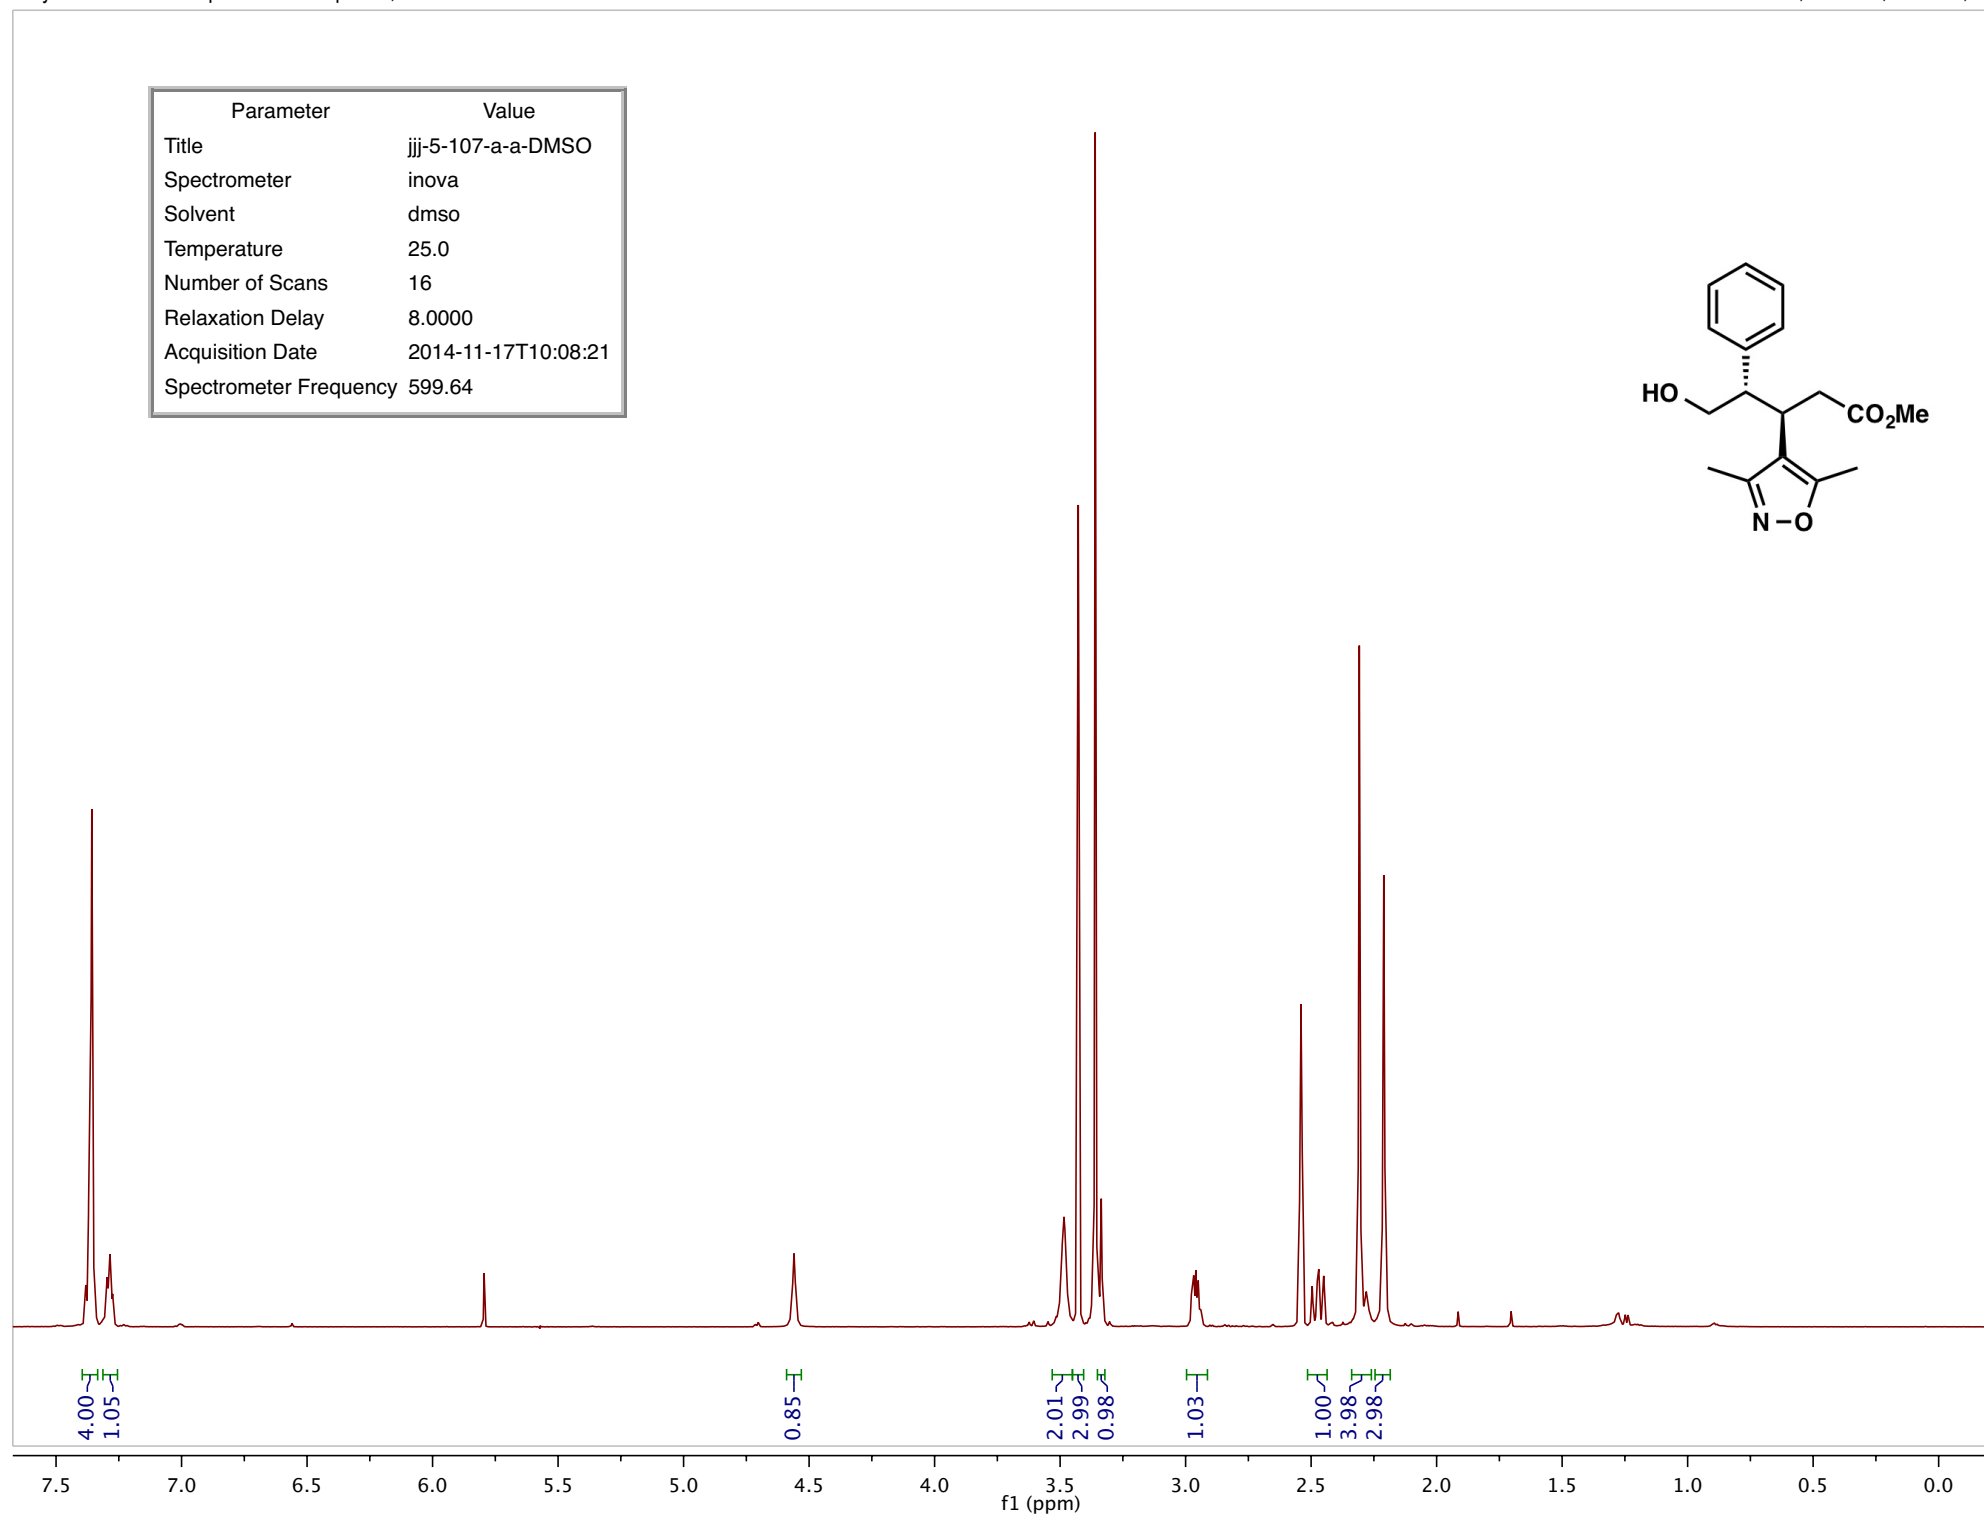

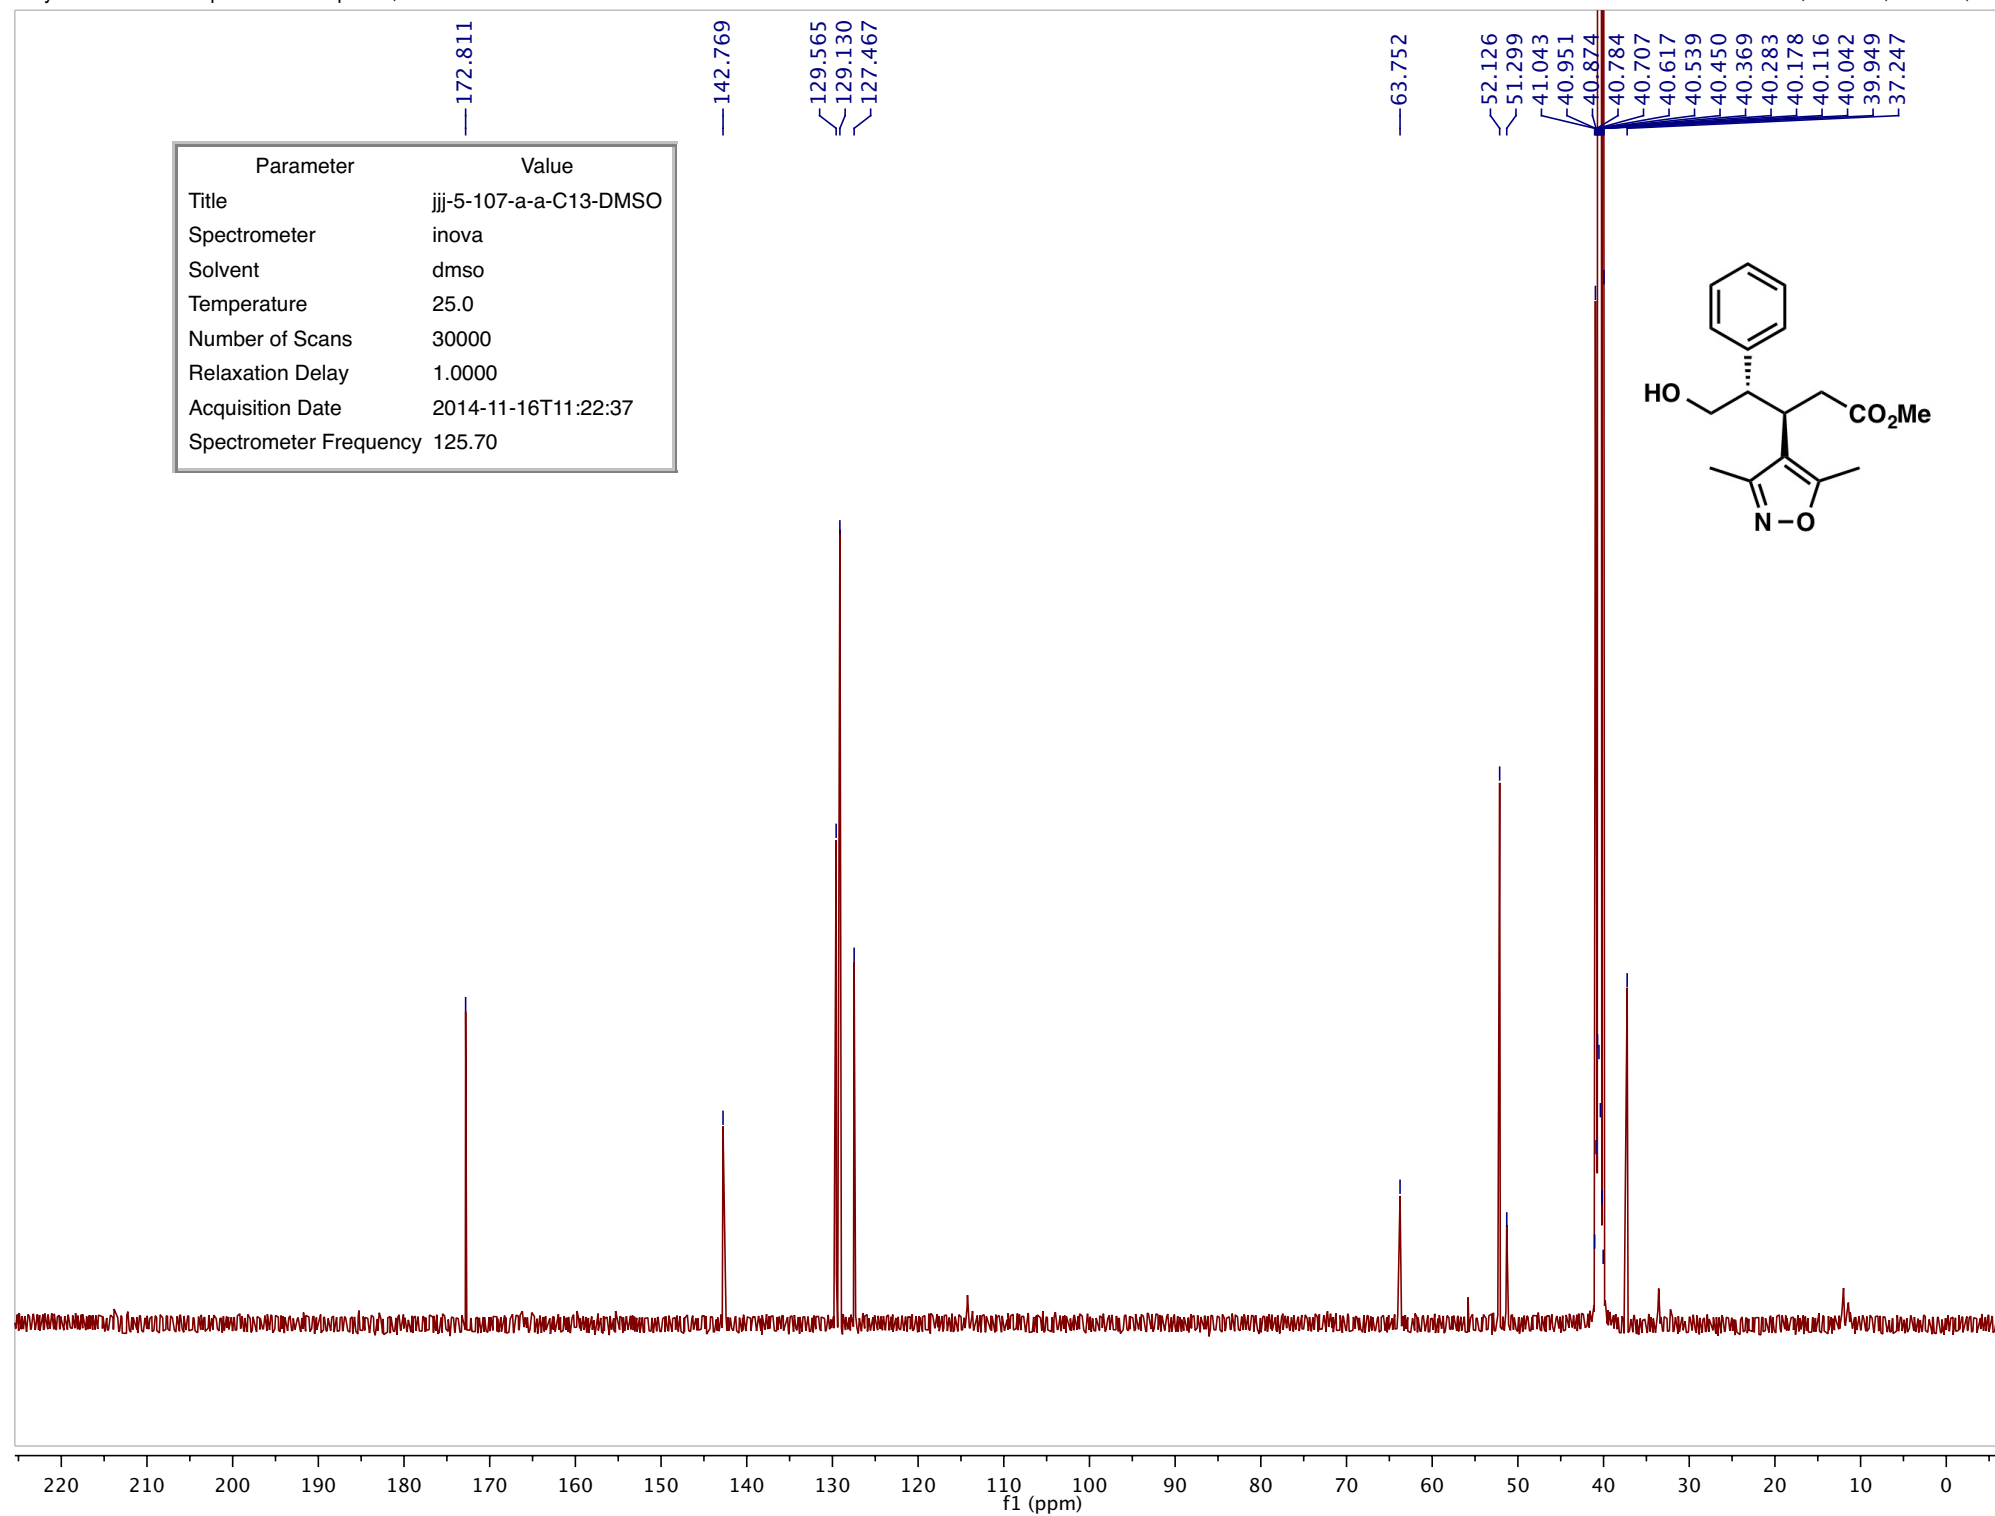

| Parameter              | Value (f2, f1)          |
|------------------------|-------------------------|
| Title                  | jjj-5-107-a-a-HMBC-DMSO |
| Spectrometer           | inova                   |
| Solvent                | dmsO                    |
| Temperature            | 25.0                    |
| Number of Scans        | 8                       |
| Relaxation Delay       | 1.0000                  |
| Acquisition Date       | 2014-11-18T15:10:14     |
| Spectrometer Frequency | (599.64, 150.79)        |
| Nucleus                | (1H, 13C)               |

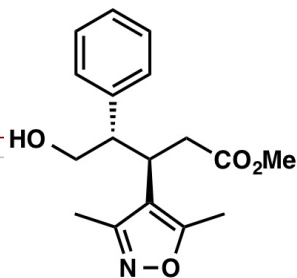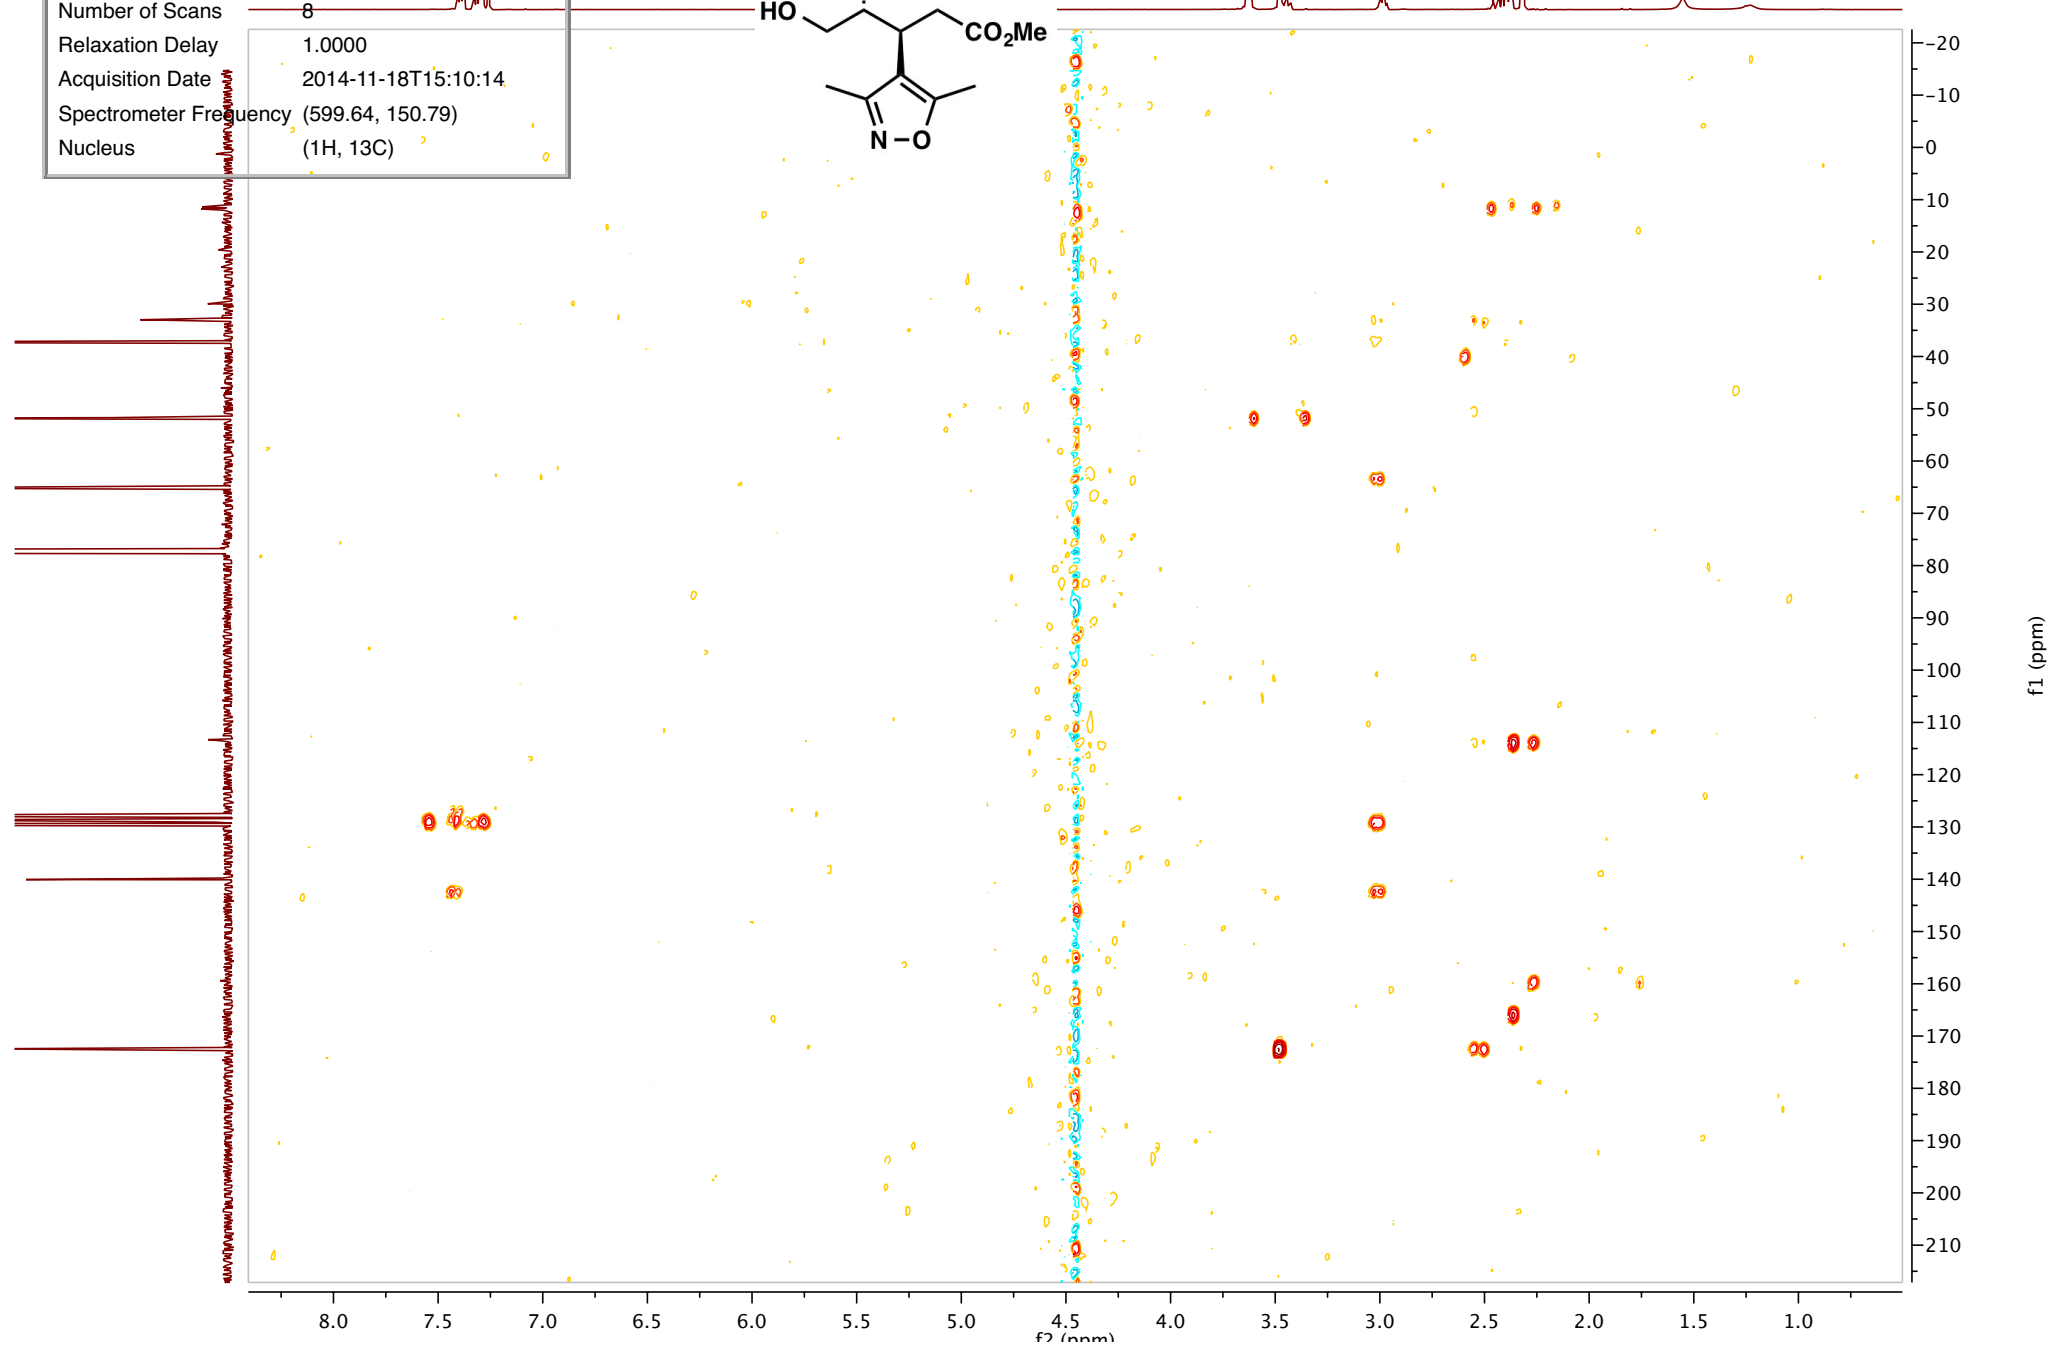

| Parameter              | Value               |
|------------------------|---------------------|
| Title                  | jjj-5-089-d-a       |
| Spectrometer           | inova               |
| Solvent                | cdcl3               |
| Temperature            | 25.0                |
| Number of Scans        | 8                   |
| Relaxation Delay       | 8.0000              |
| Acquisition Date       | 2014-10-28T16:55:08 |
| Spectrometer Frequency | 599.64              |

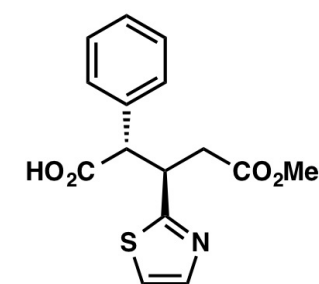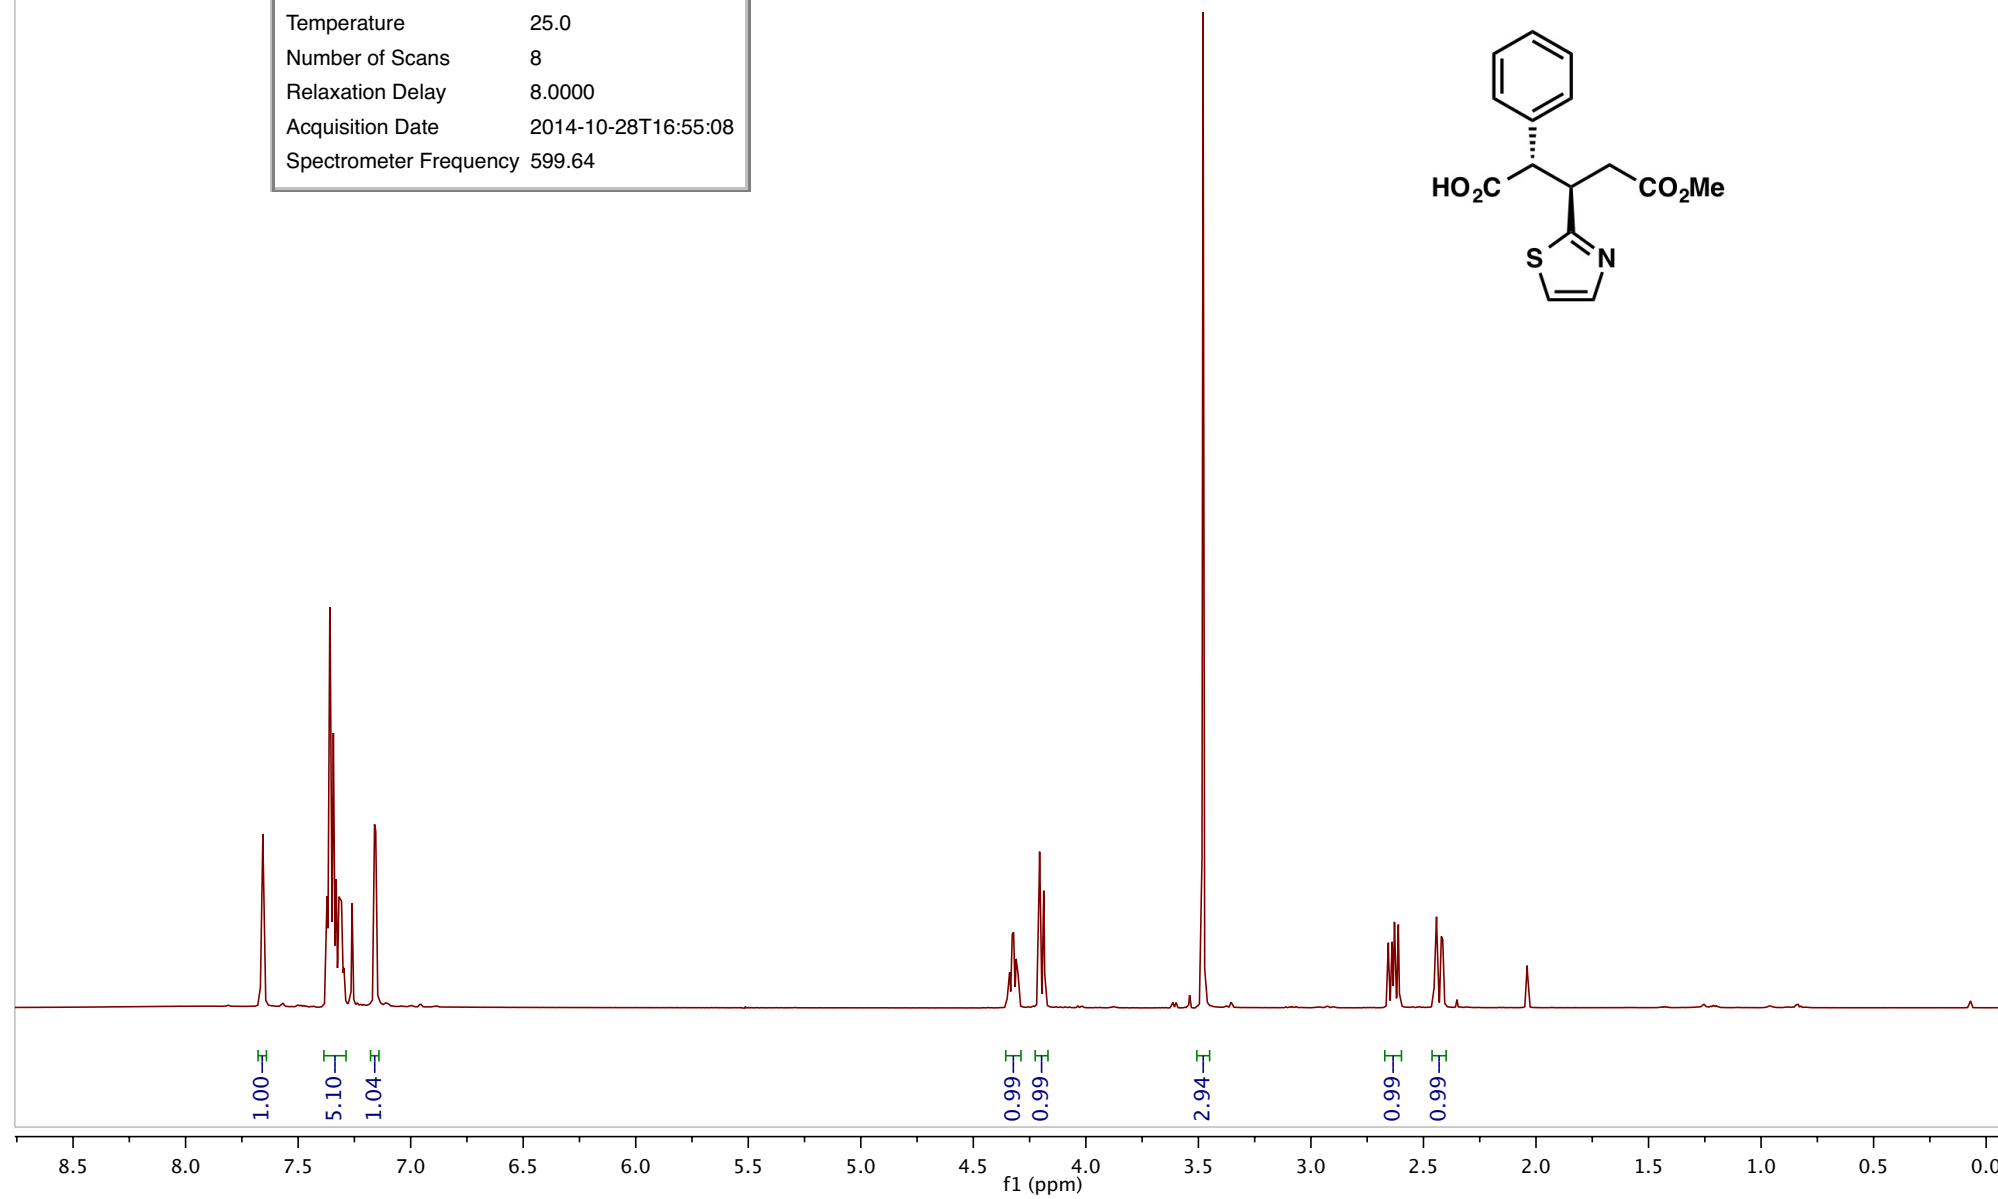

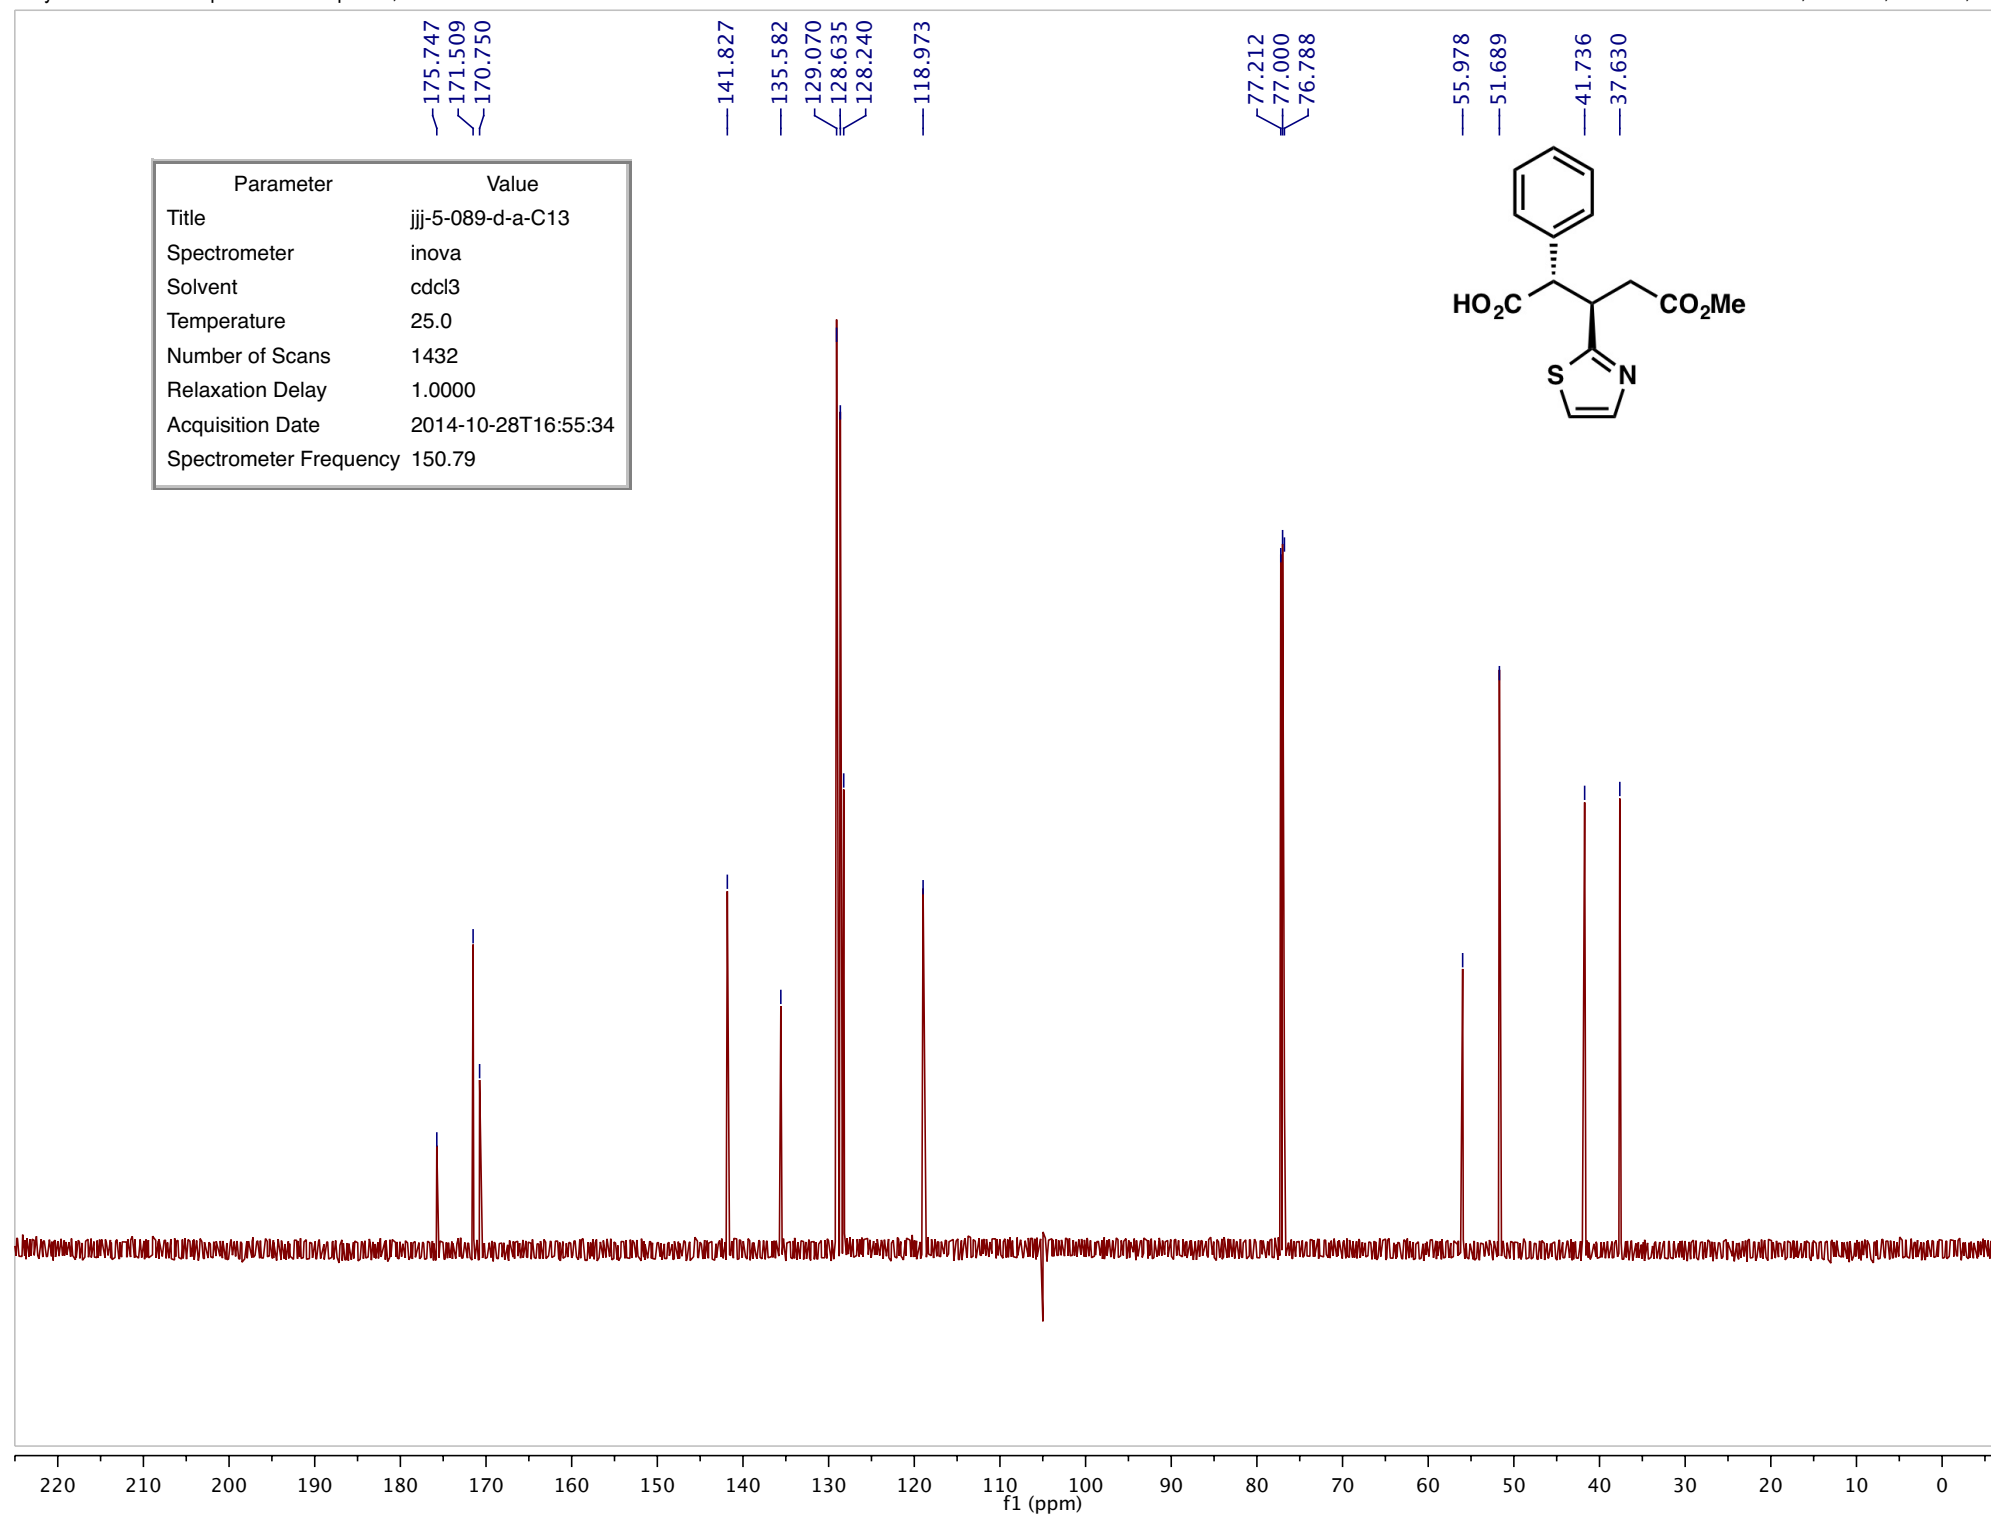

| Parameter              | Value               |
|------------------------|---------------------|
| Title                  | jjj-5-092-a-a       |
| Spectrometer           | inova               |
| Solvent                | cdcl3               |
| Temperature            | 25.0                |
| Number of Scans        | 8                   |
| Relaxation Delay       | 8.0000              |
| Acquisition Date       | 2014-10-29T13:18:26 |
| Spectrometer Frequency | 599.64              |

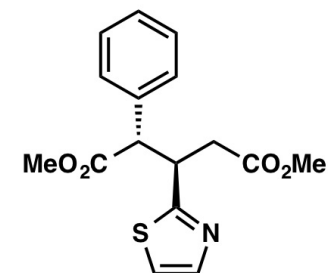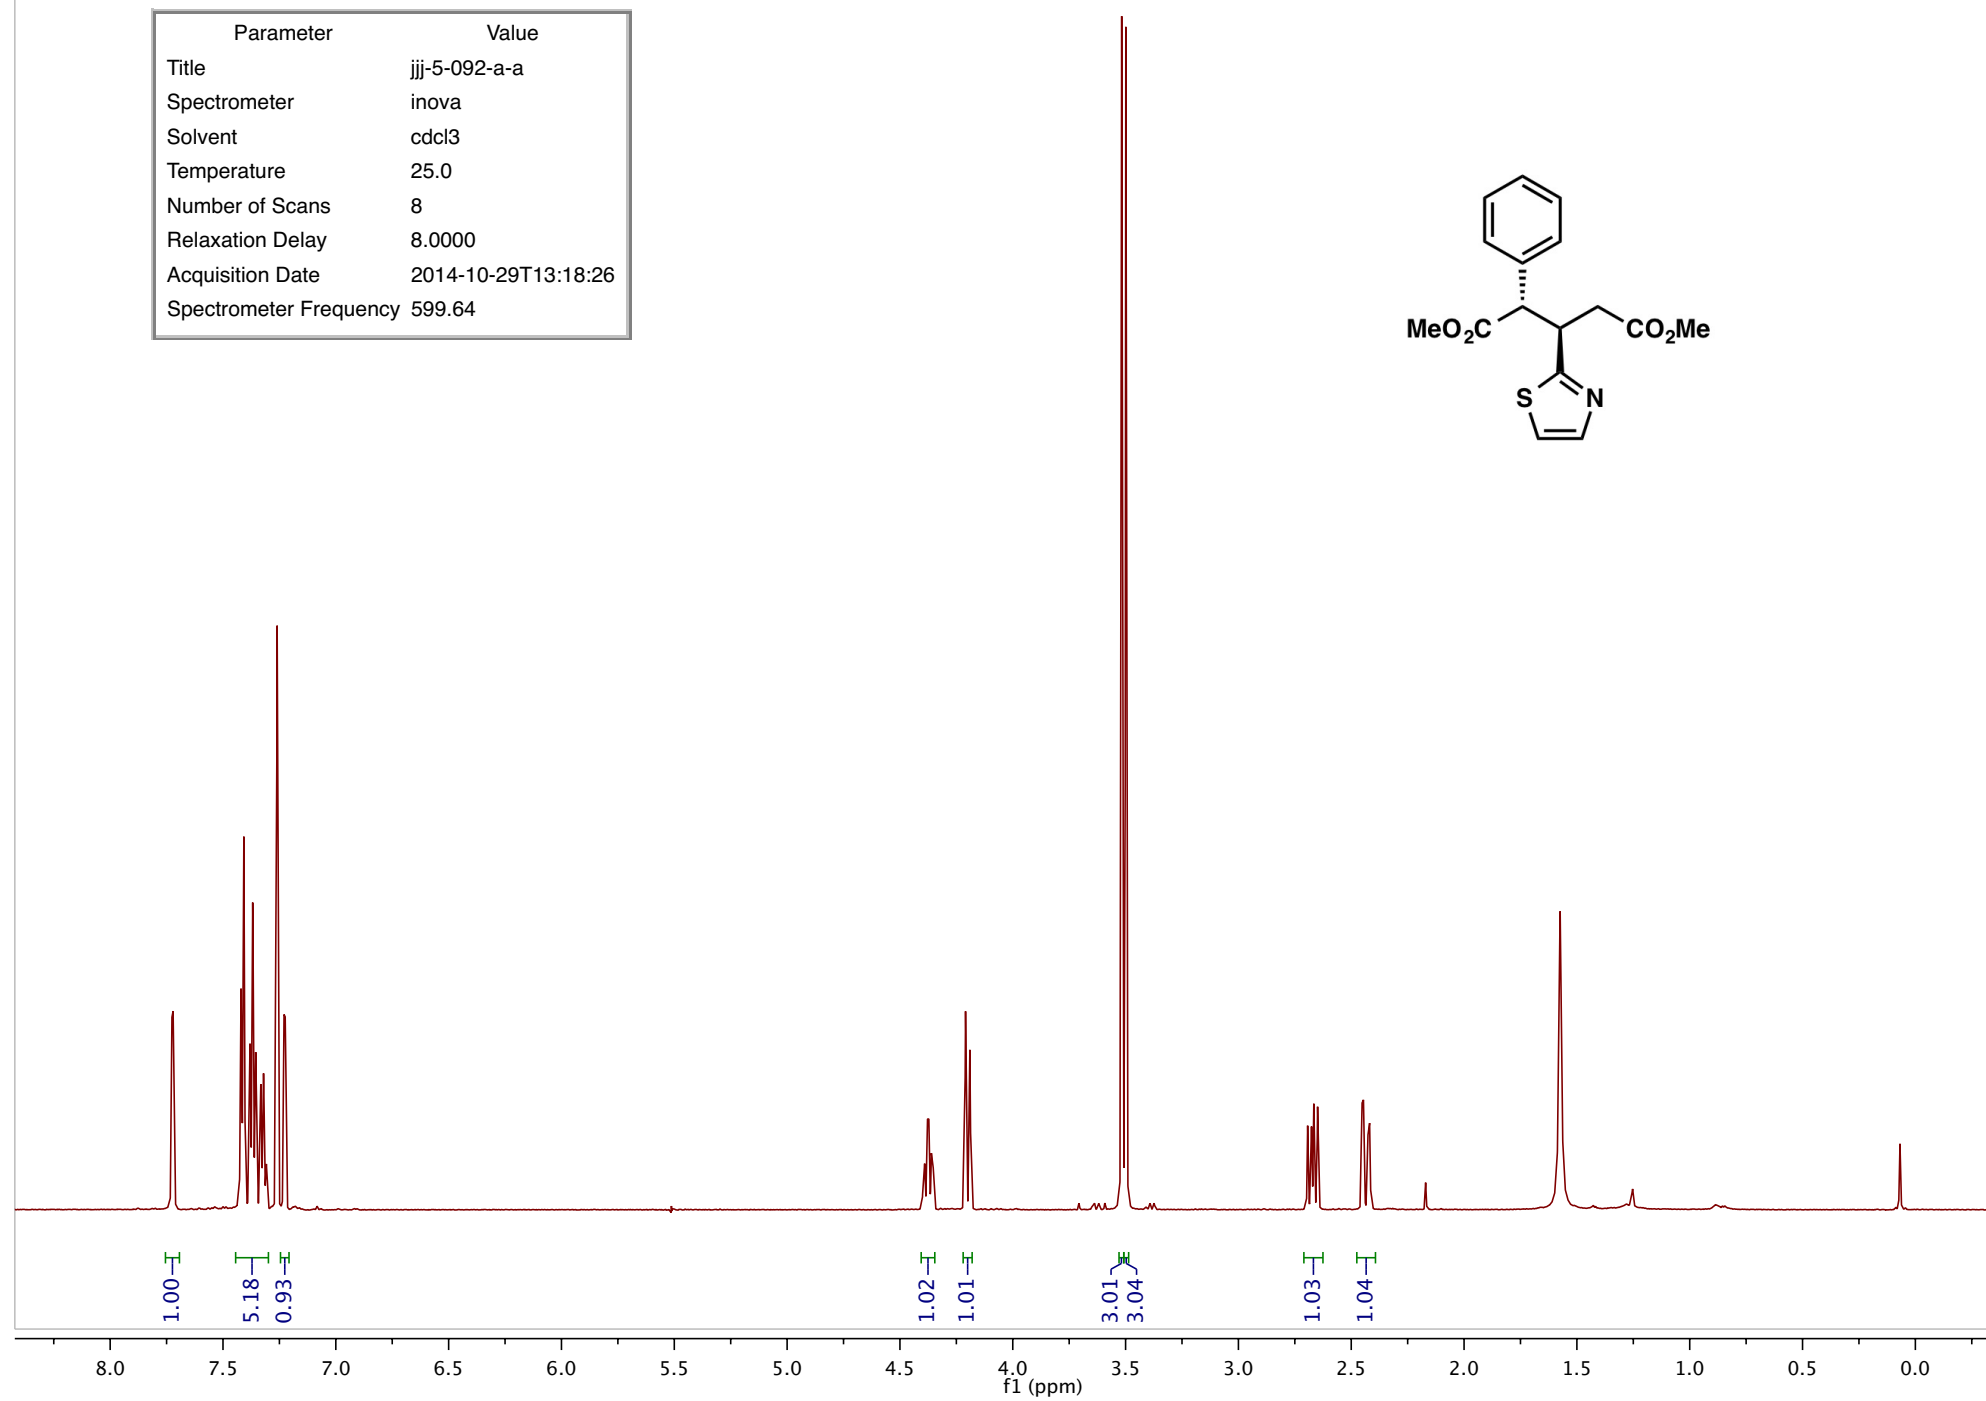

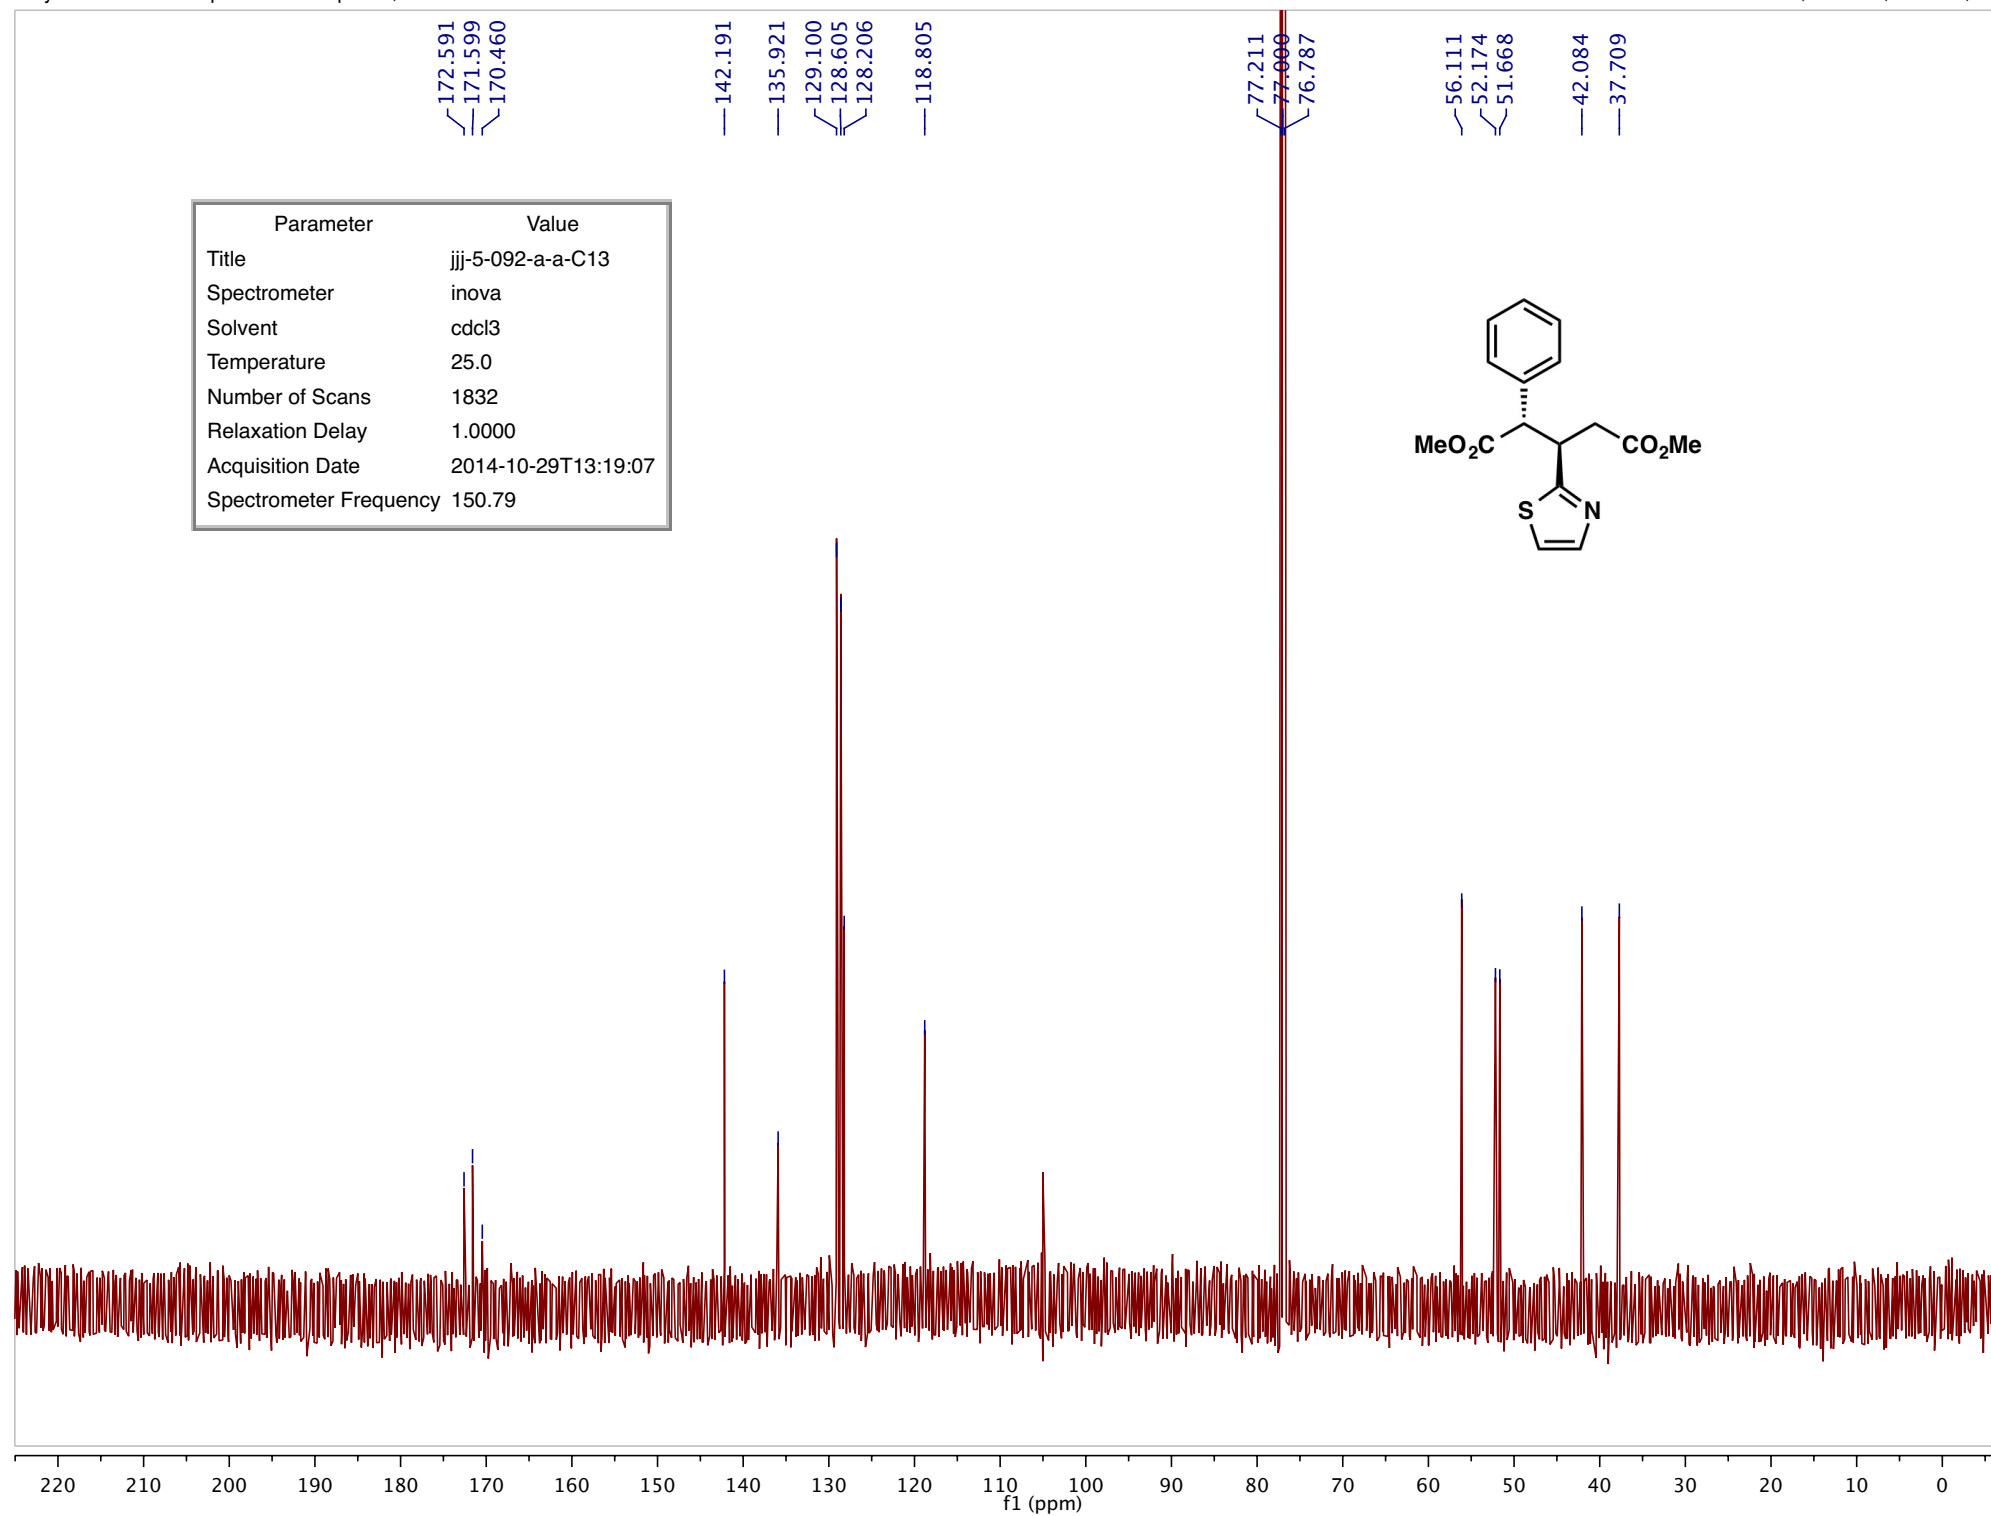

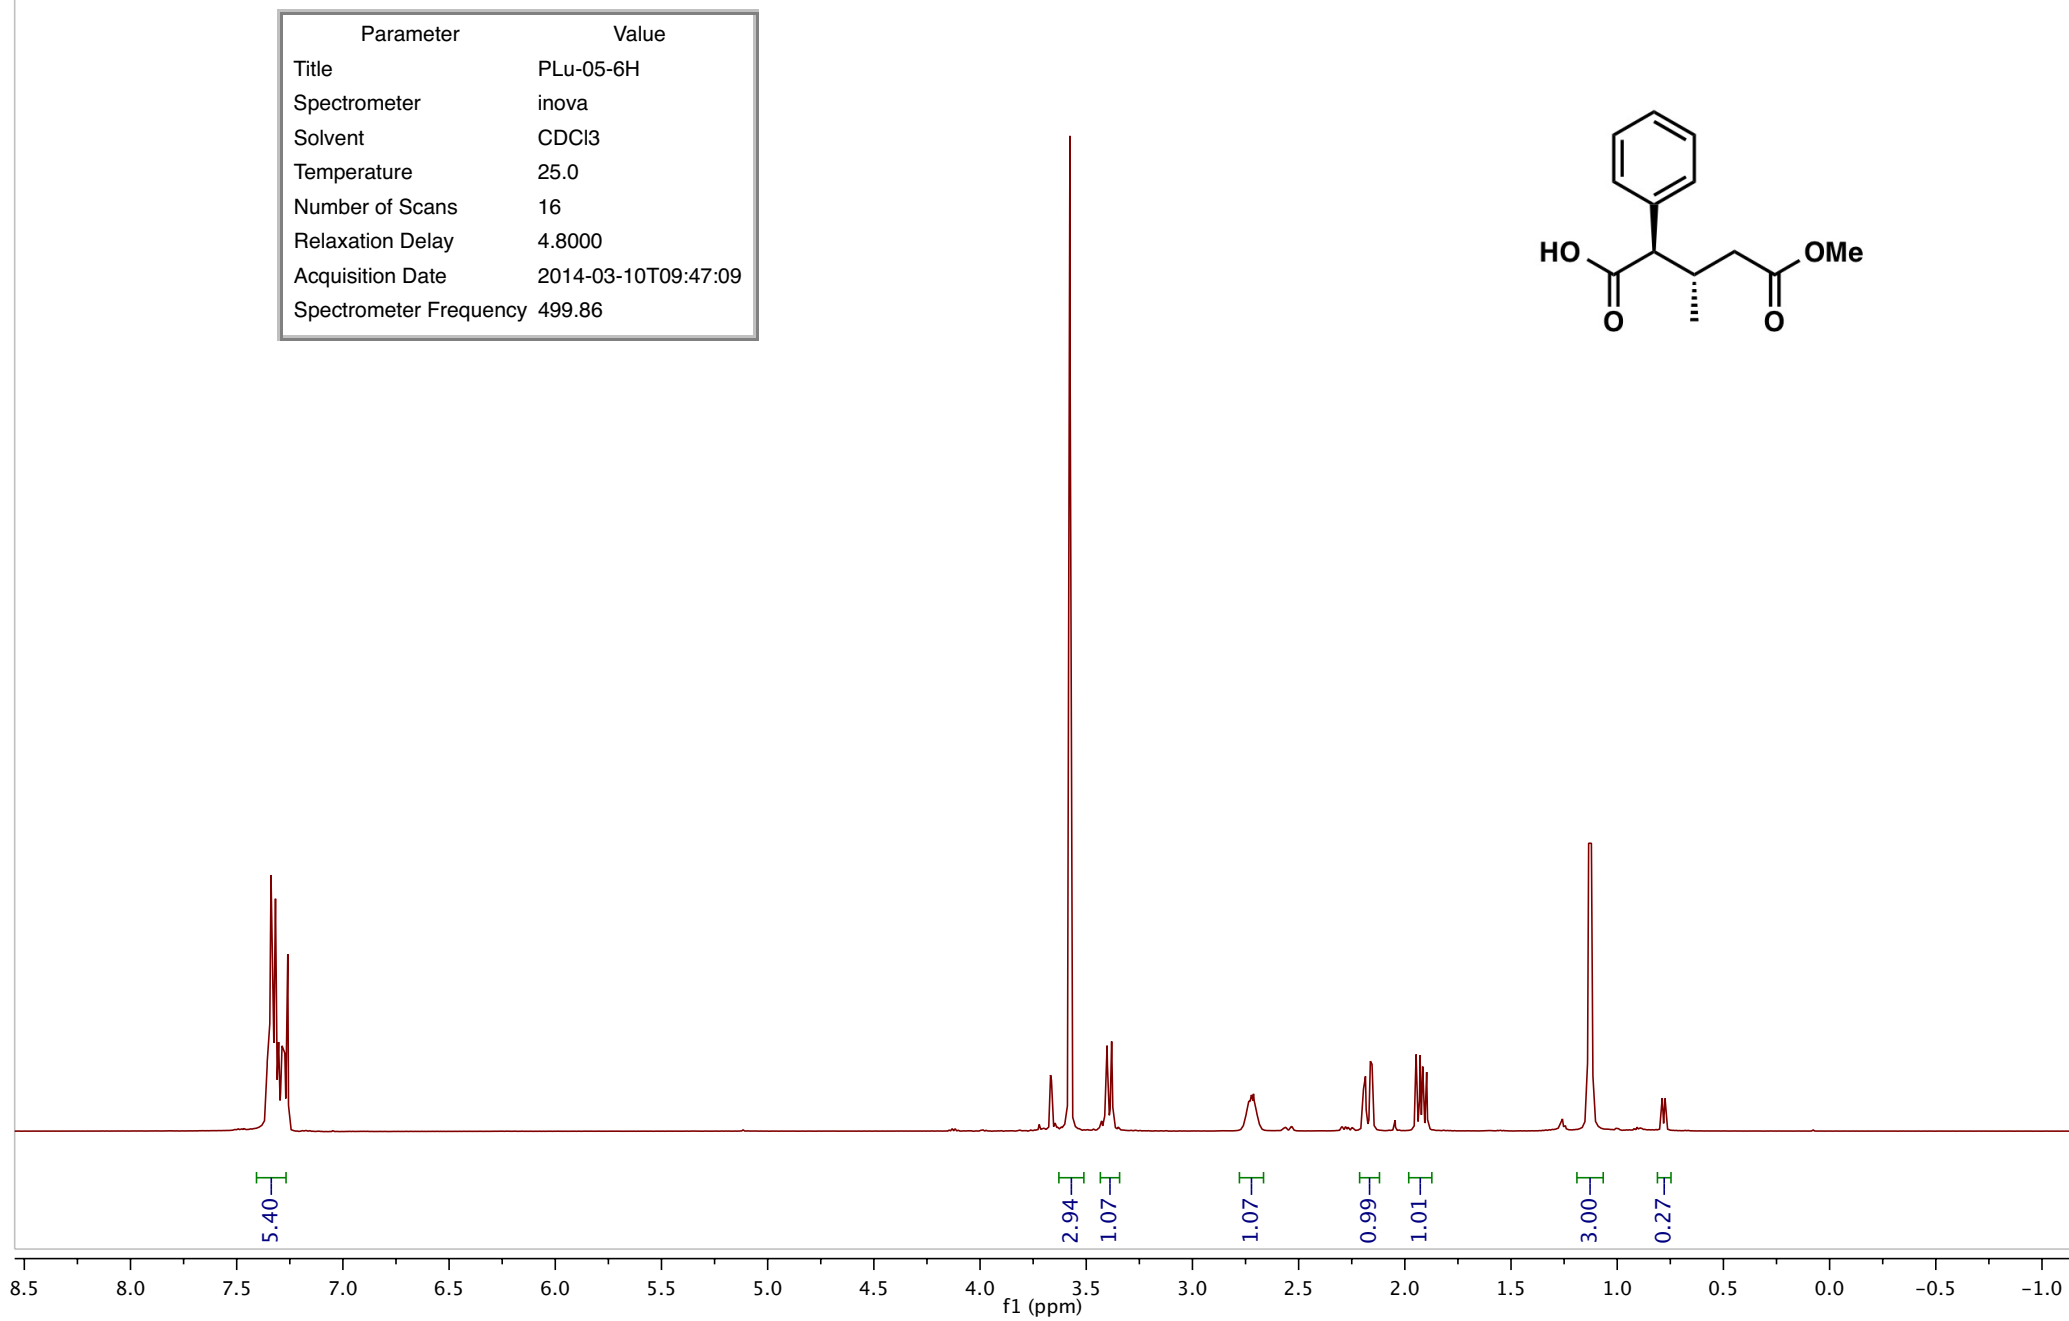



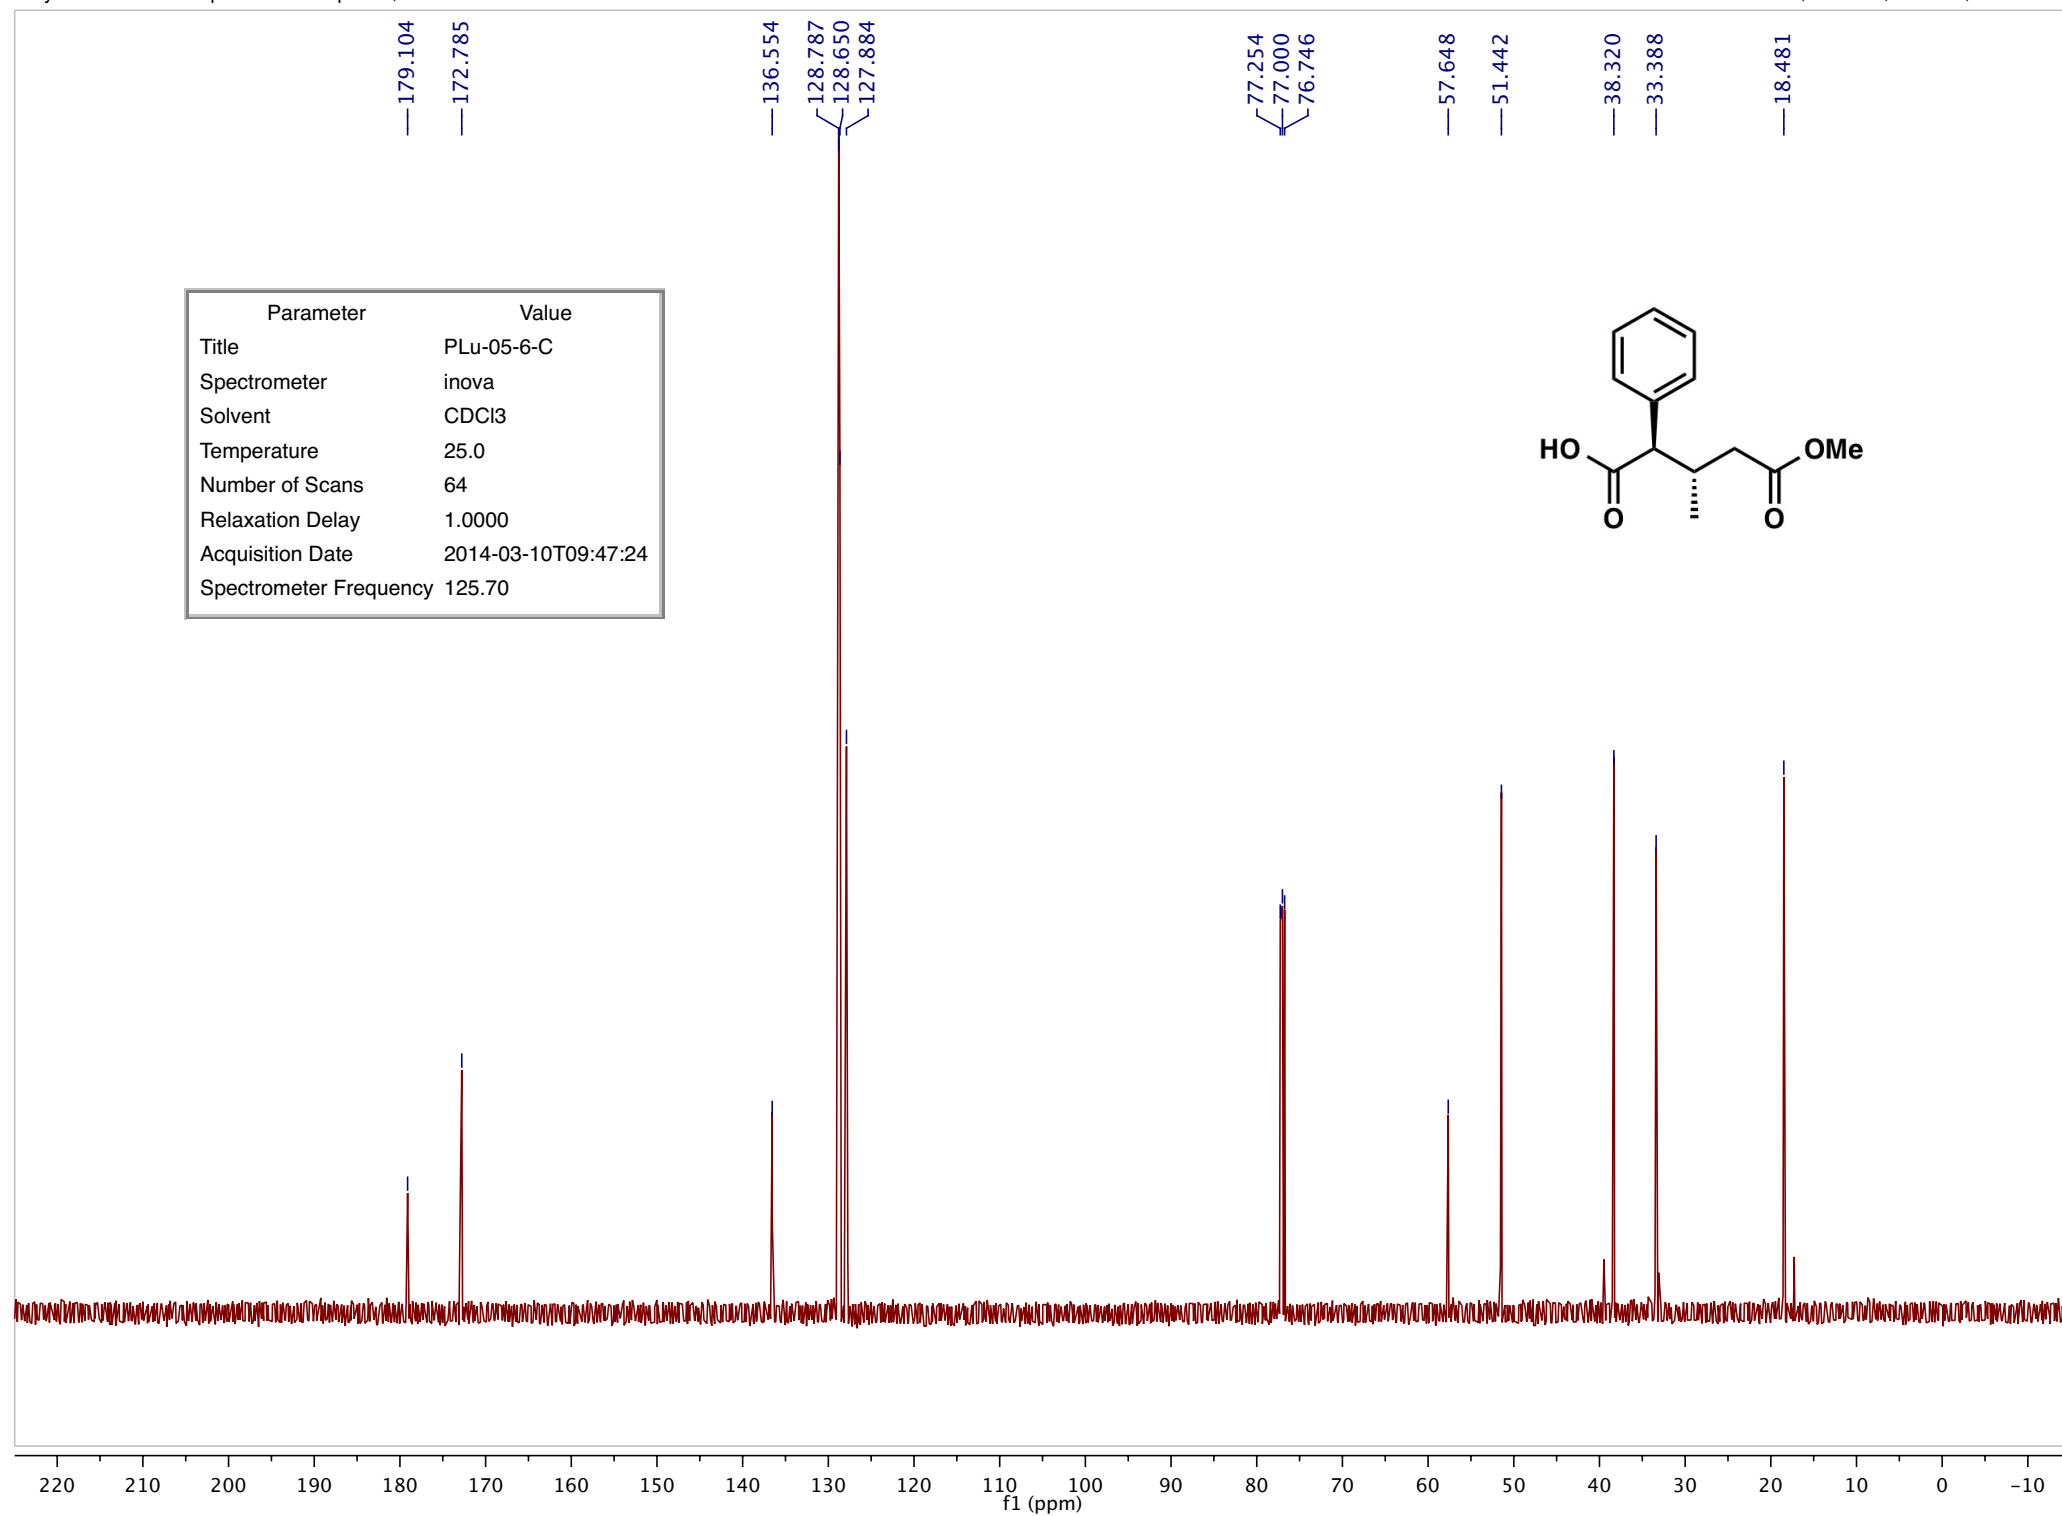

| Parameter              | Value               |
|------------------------|---------------------|
| Title                  | PLu-05-55-Me        |
| Spectrometer           | inova               |
| Solvent                | CDCl <sub>3</sub>   |
| Temperature            | 25.0                |
| Number of Scans        | 16                  |
| Relaxation Delay       | 4.8000              |
| Acquisition Date       | 2014-04-21T09:05:41 |
| Spectrometer Frequency | 499.86              |

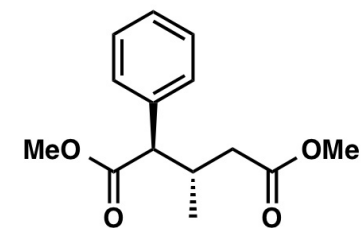

4.26  
2.45

2.87  
3.00  
1.08

1.12

1.06

1.06

3.21

0.27

8.0 7.5 7.0 6.5 6.0 5.5 5.0 4.5 4.0 3.5 3.0 2.5 2.0 1.5 1.0 0.5 0.0 -0.5

f1 (ppm)

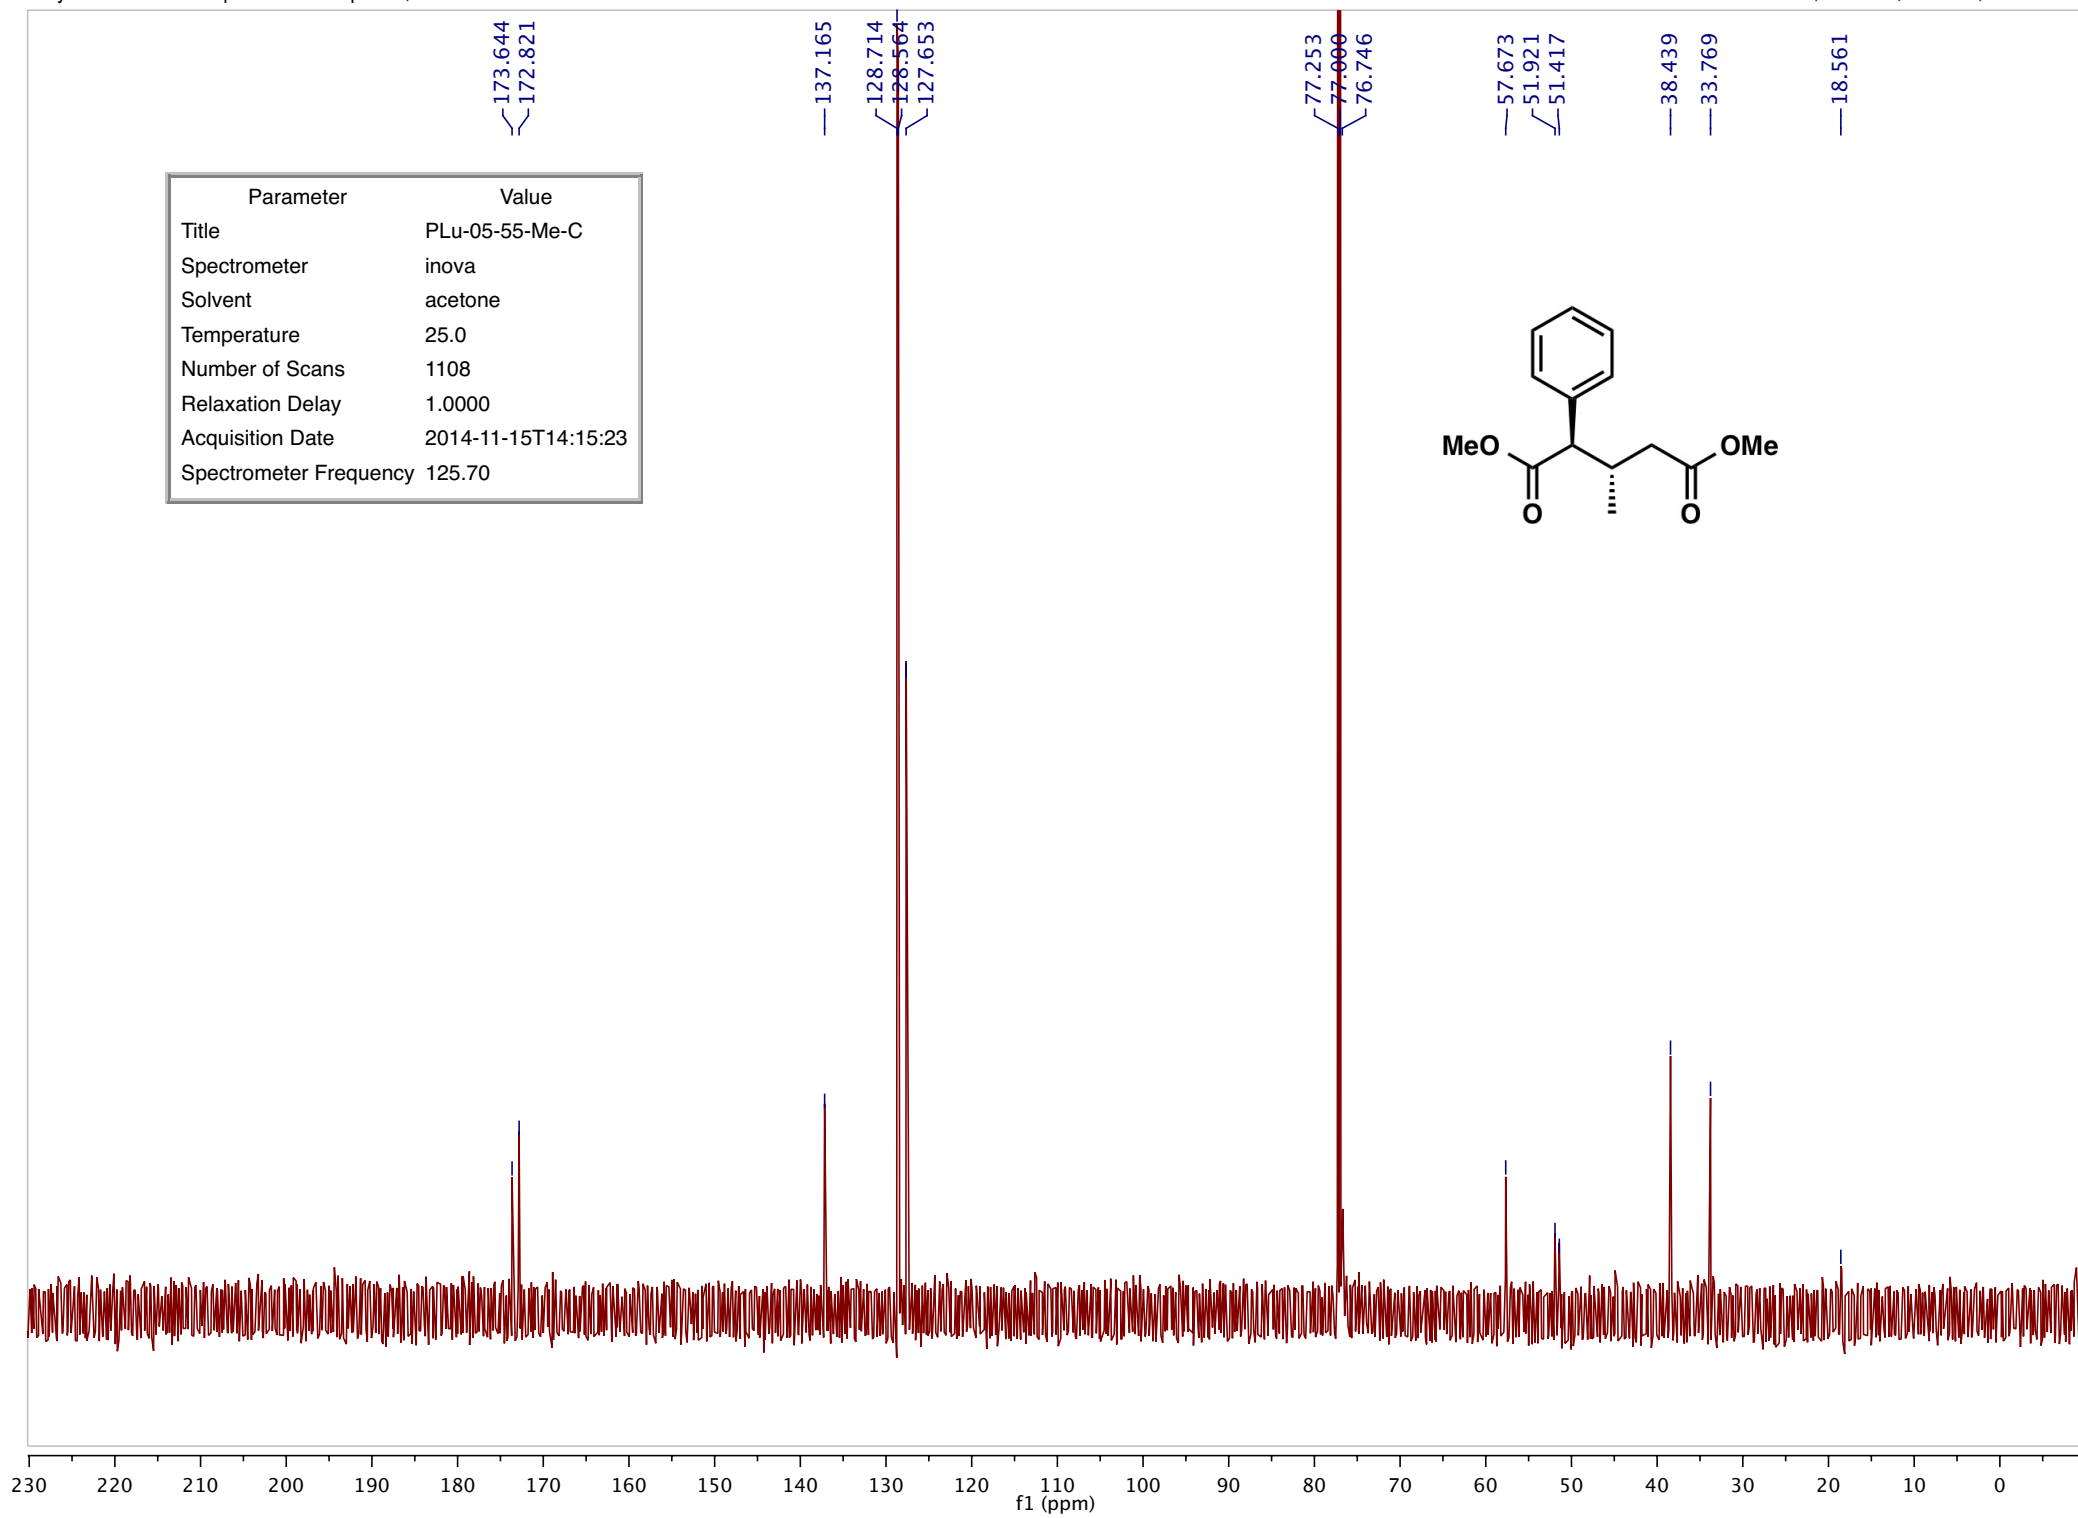

| Parameter              | Value               |
|------------------------|---------------------|
| Title                  | PLu-05-155-H        |
| Spectrometer           | inova               |
| Solvent                | CDCl <sub>3</sub>   |
| Temperature            | 25.0                |
| Number of Scans        | 16                  |
| Relaxation Delay       | 4.8000              |
| Acquisition Date       | 2014-07-07T09:31:28 |
| Spectrometer Frequency | 499.86              |

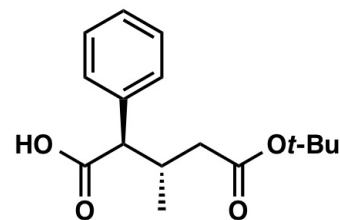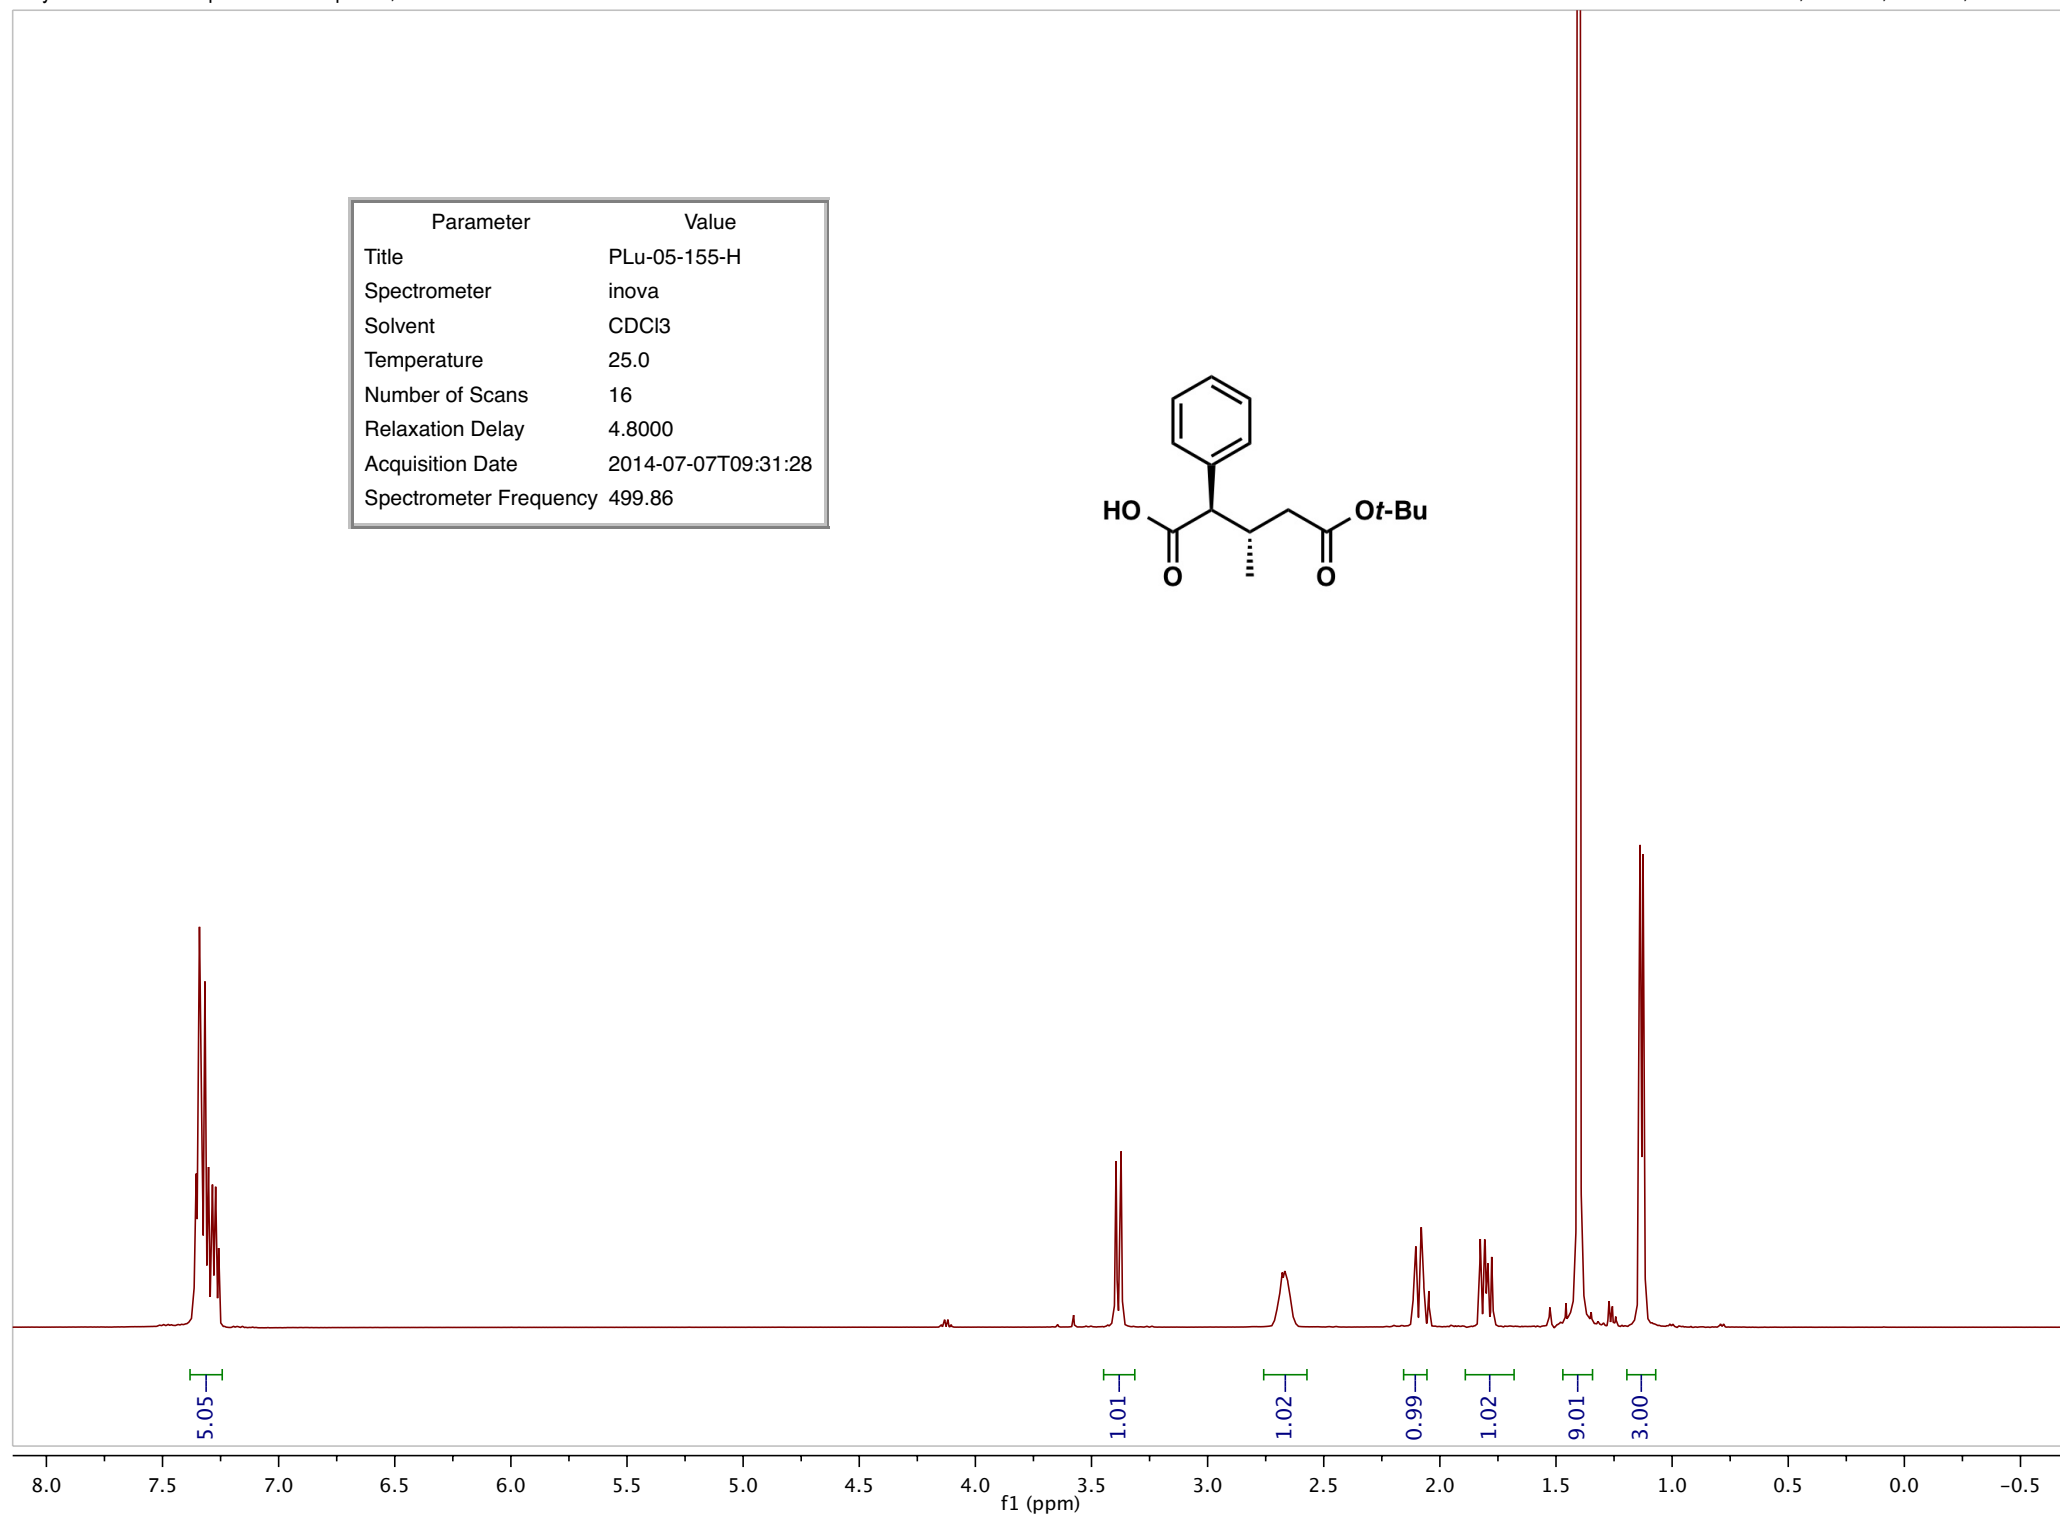

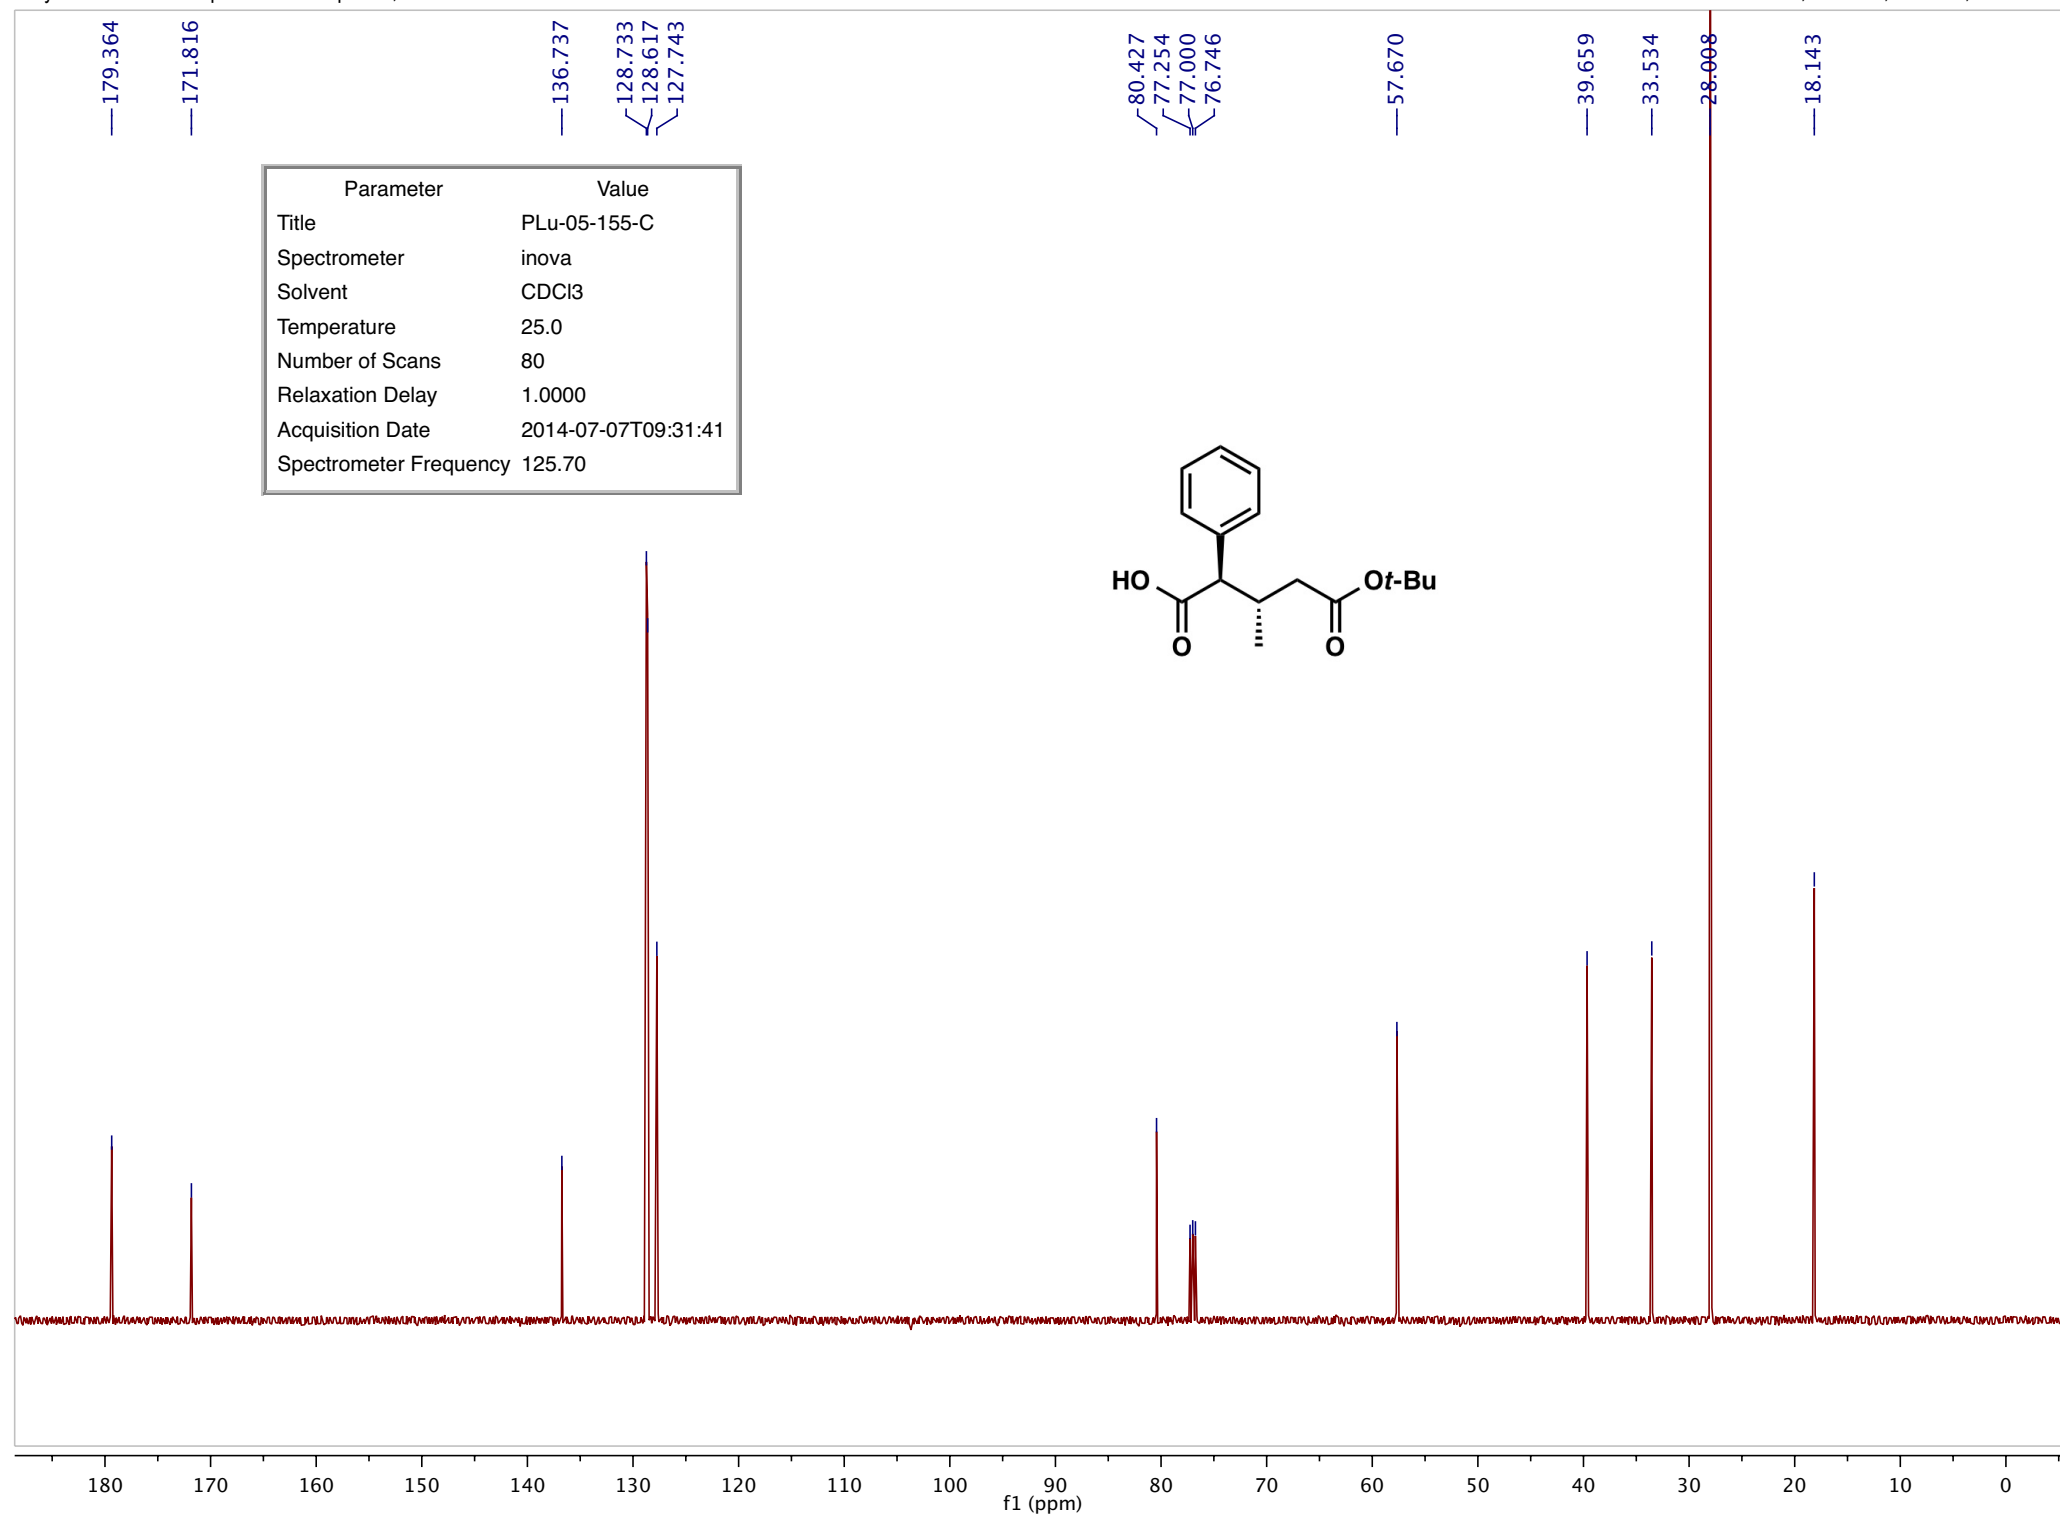

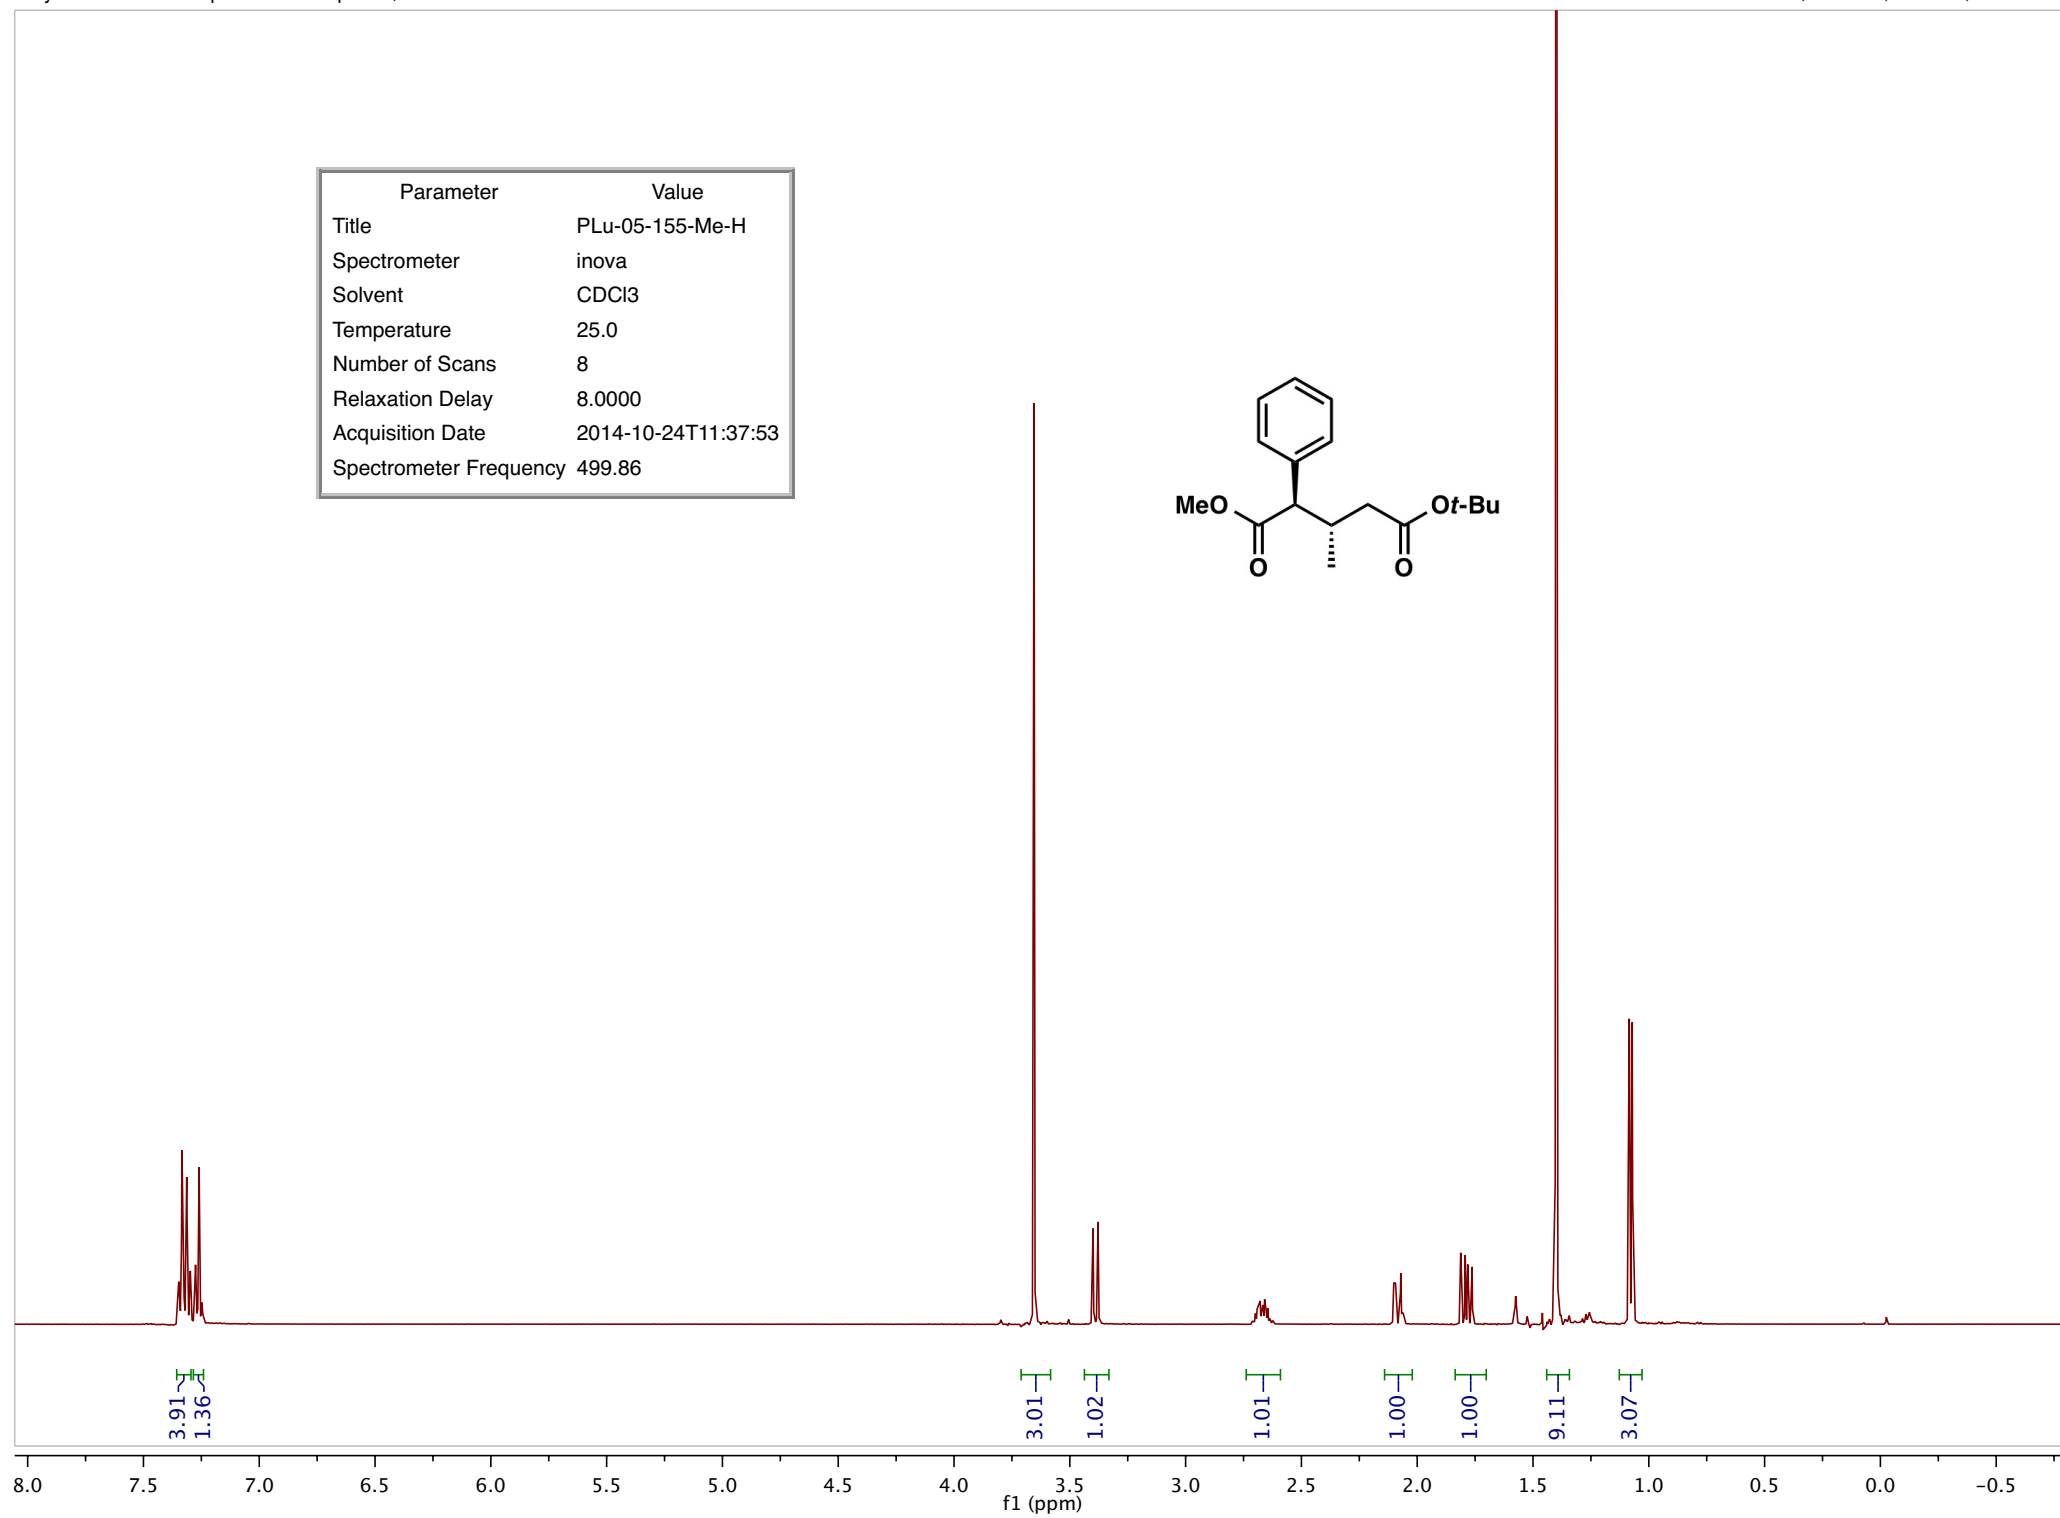

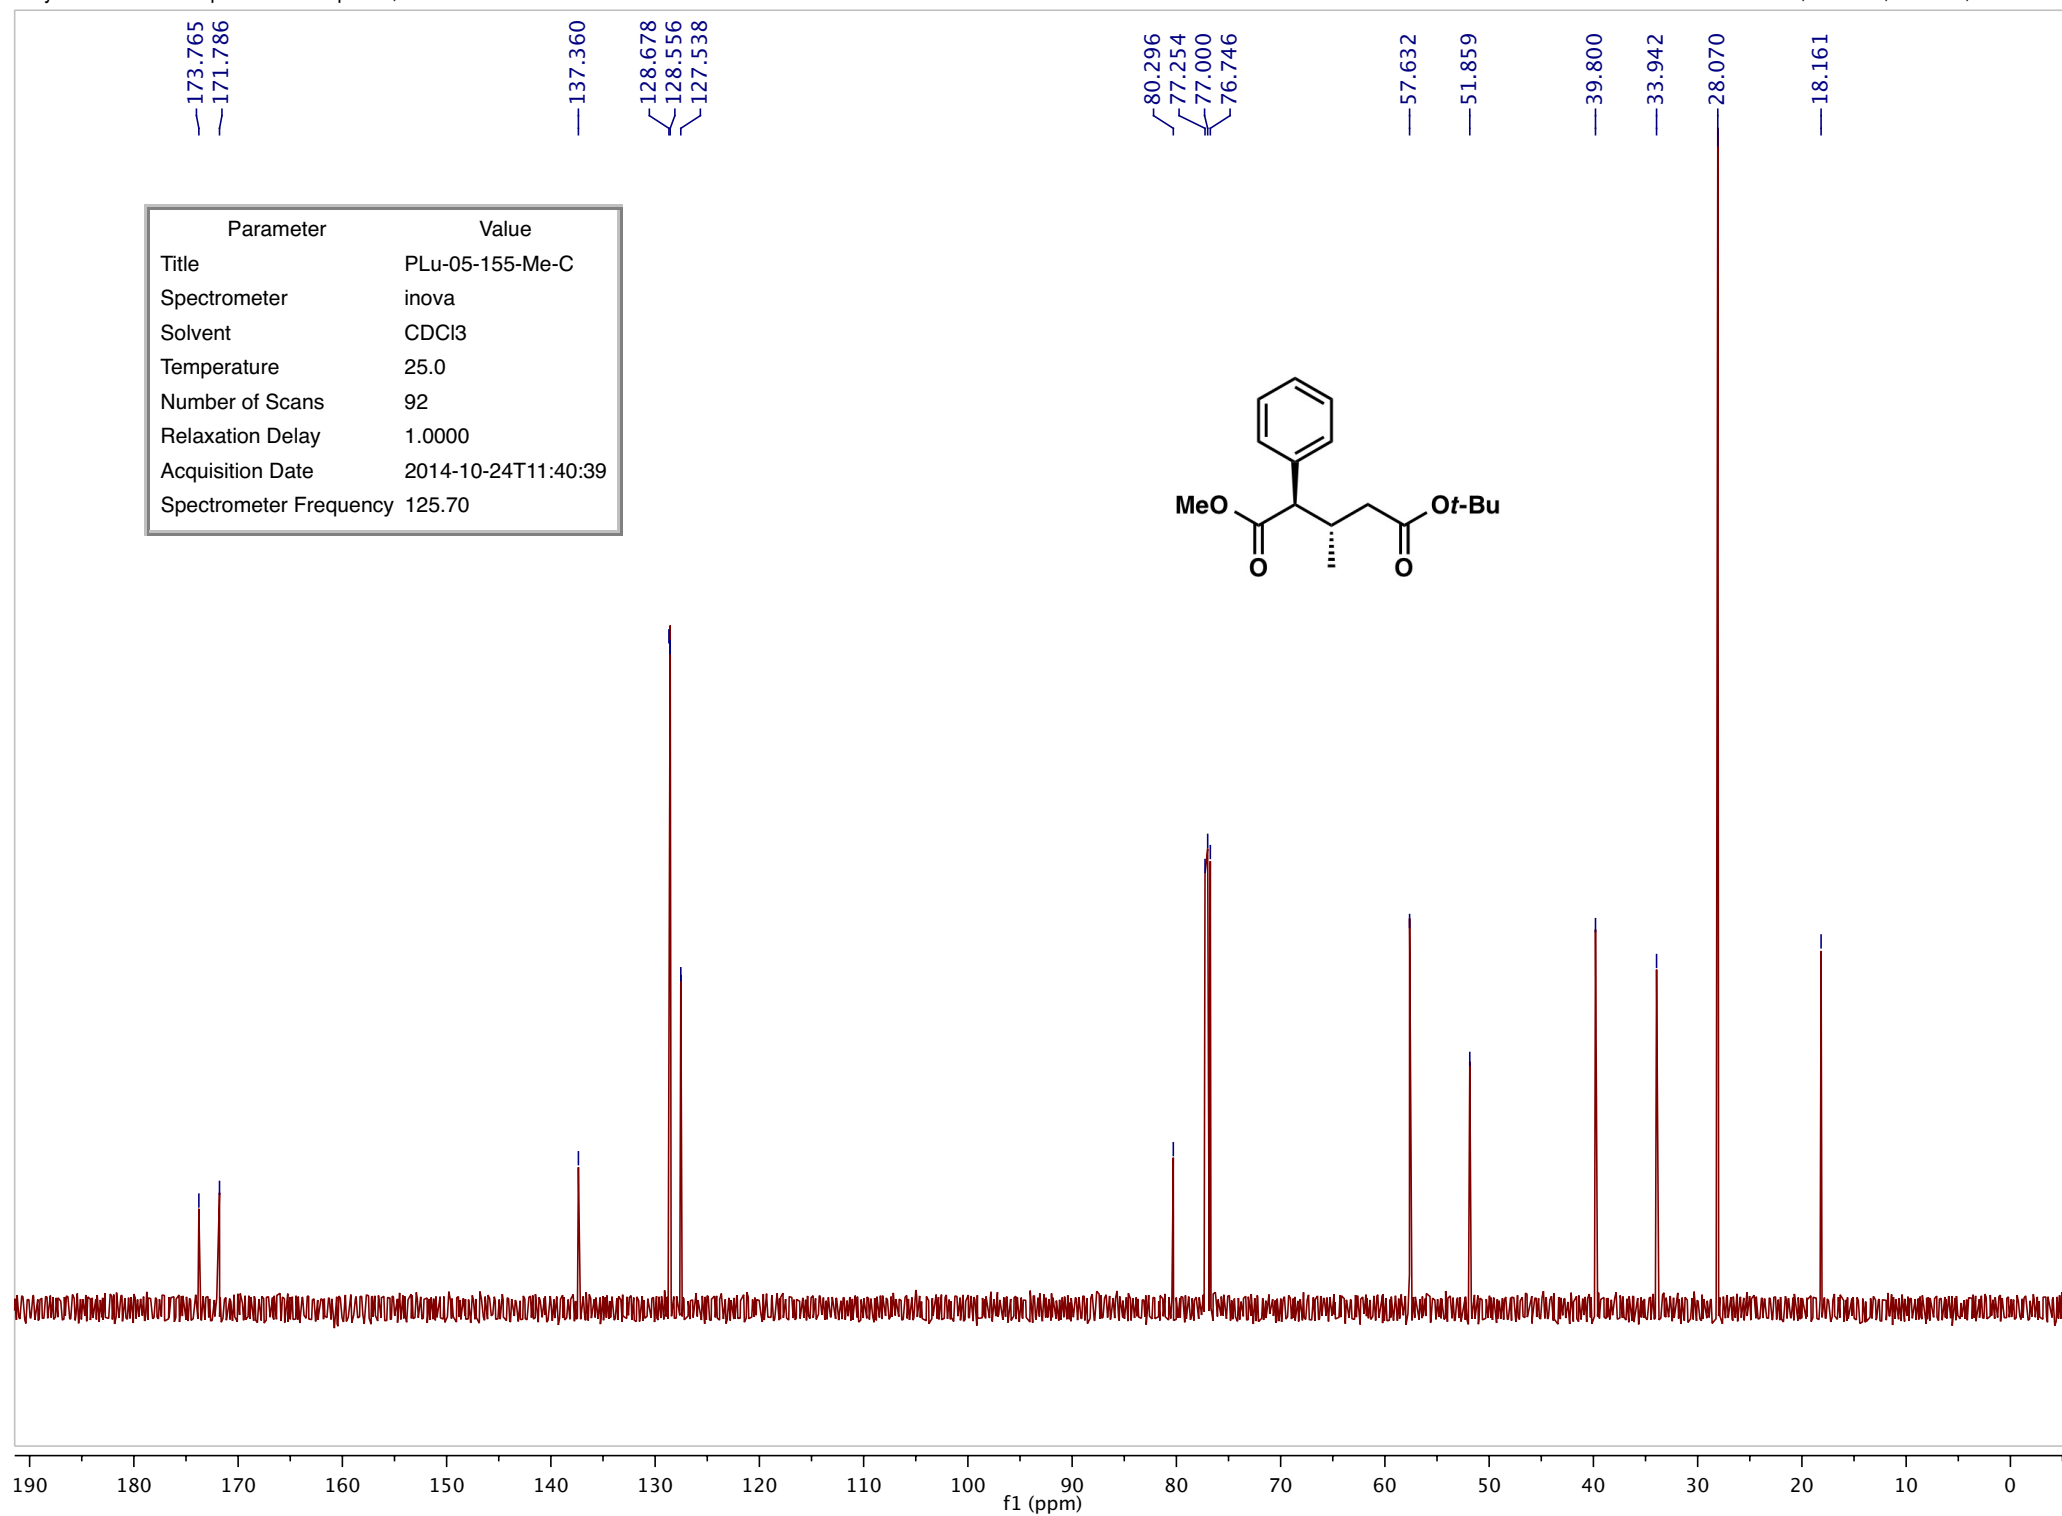

| Parameter              | Value               |
|------------------------|---------------------|
| Title                  | PLu-05-138-H        |
| Spectrometer           | inova               |
| Solvent                | CDCl <sub>3</sub>   |
| Temperature            | 25.0                |
| Number of Scans        | 8                   |
| Relaxation Delay       | 4.8000              |
| Acquisition Date       | 2014-09-03T10:25:47 |
| Spectrometer Frequency | 499.86              |

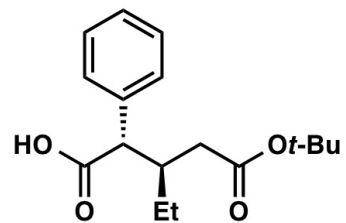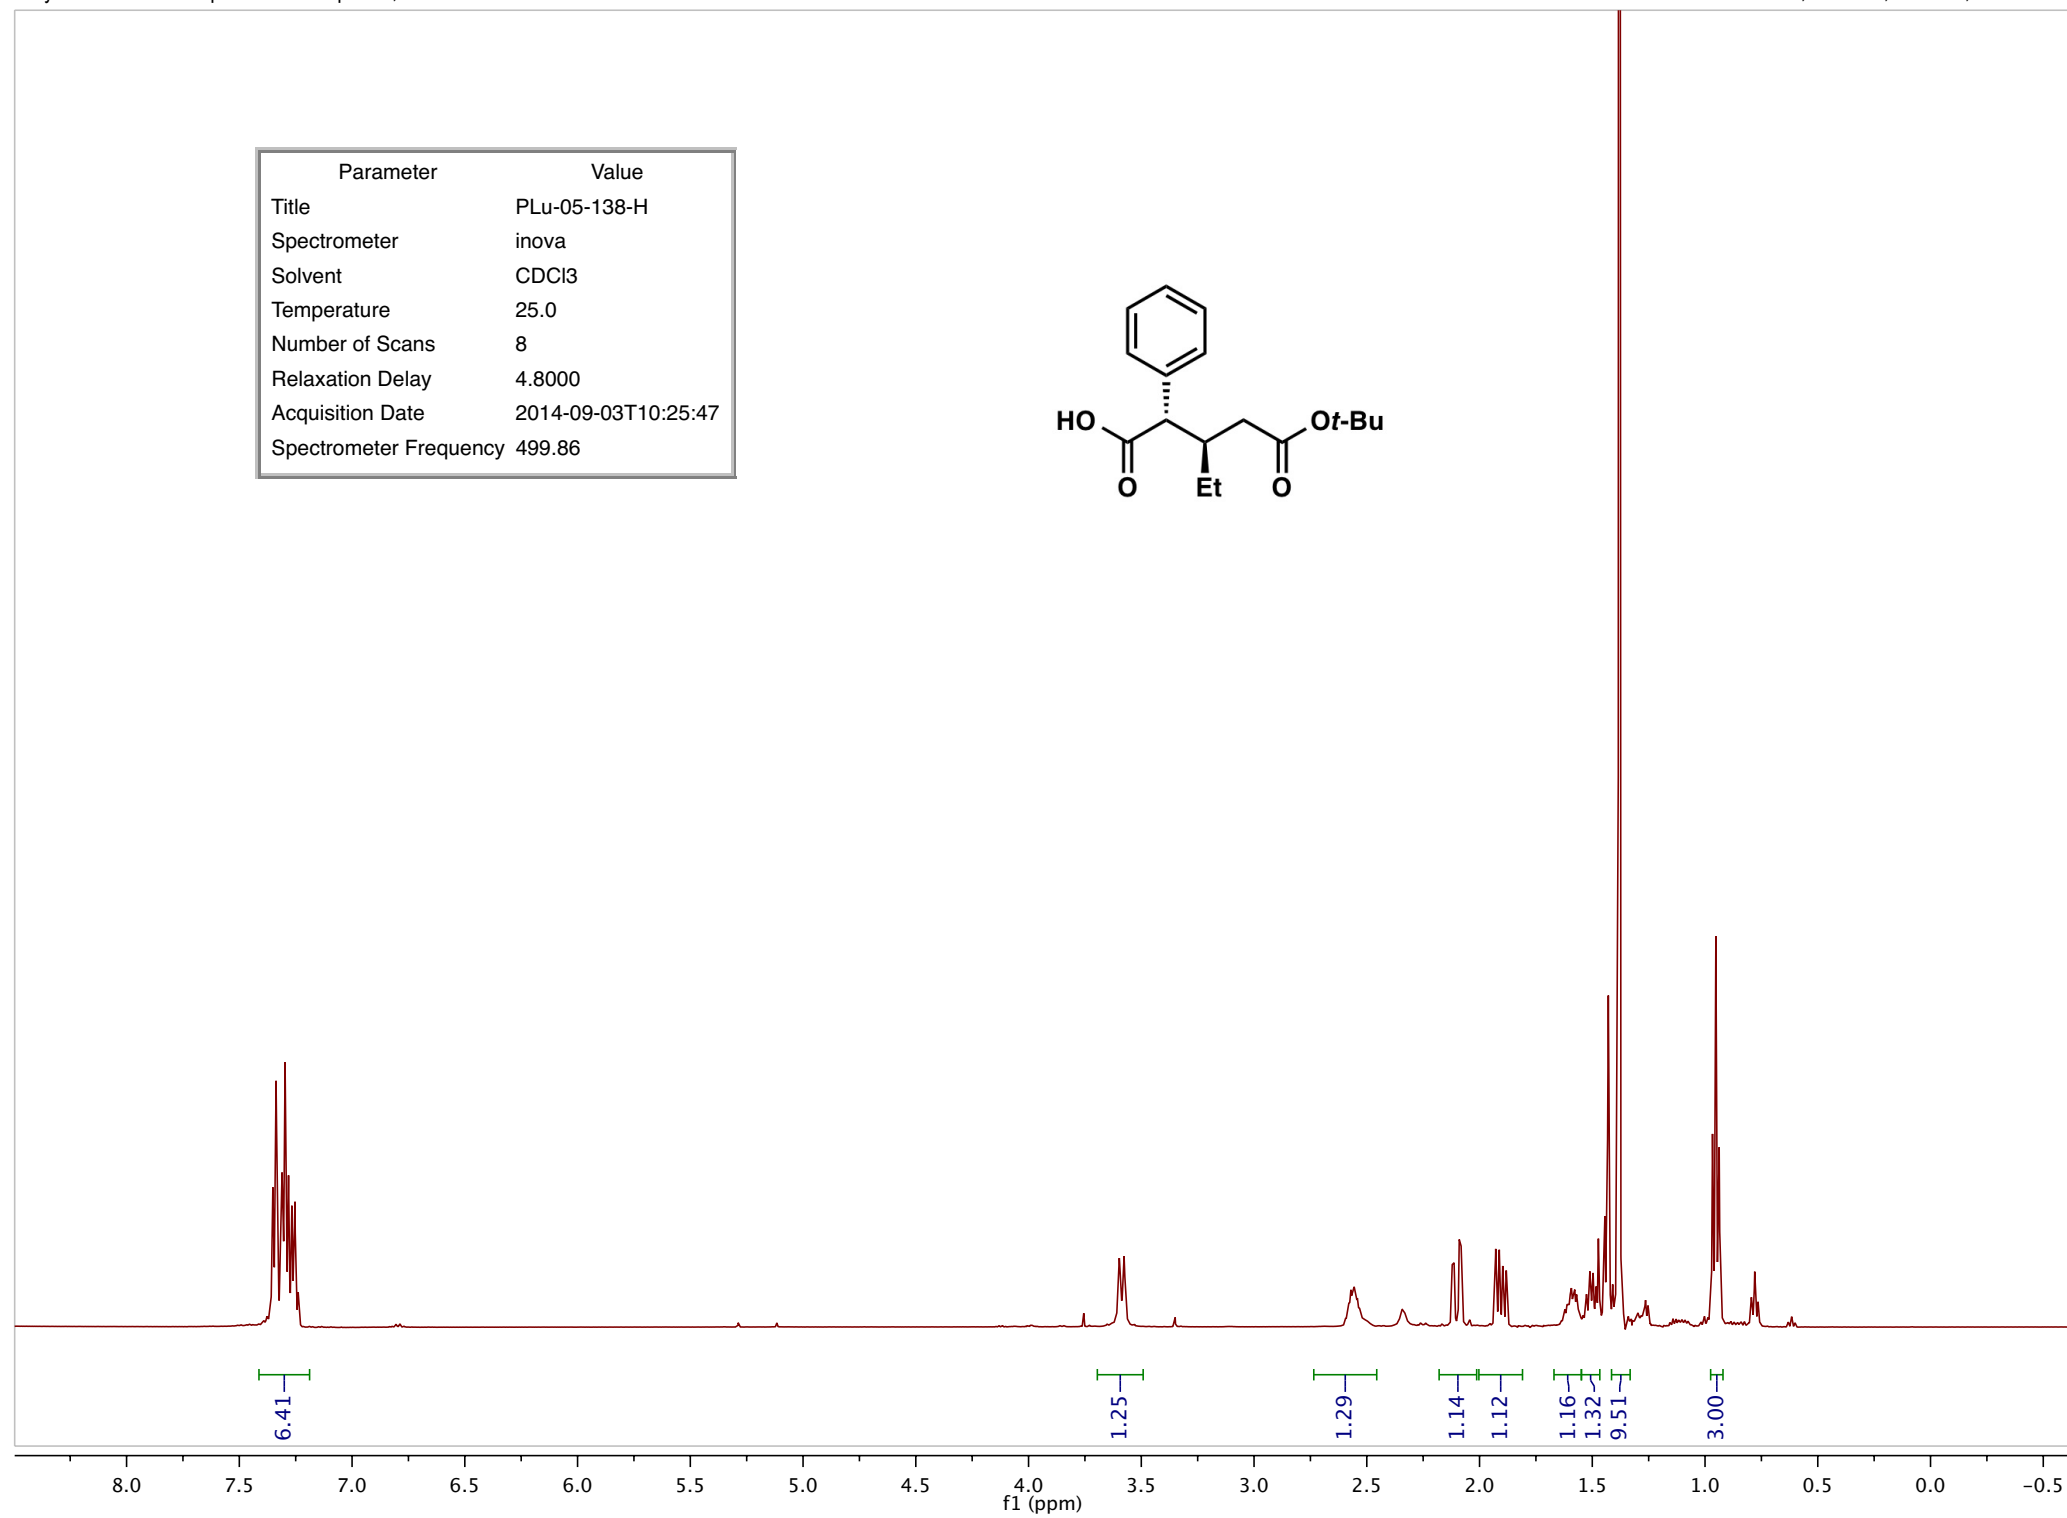



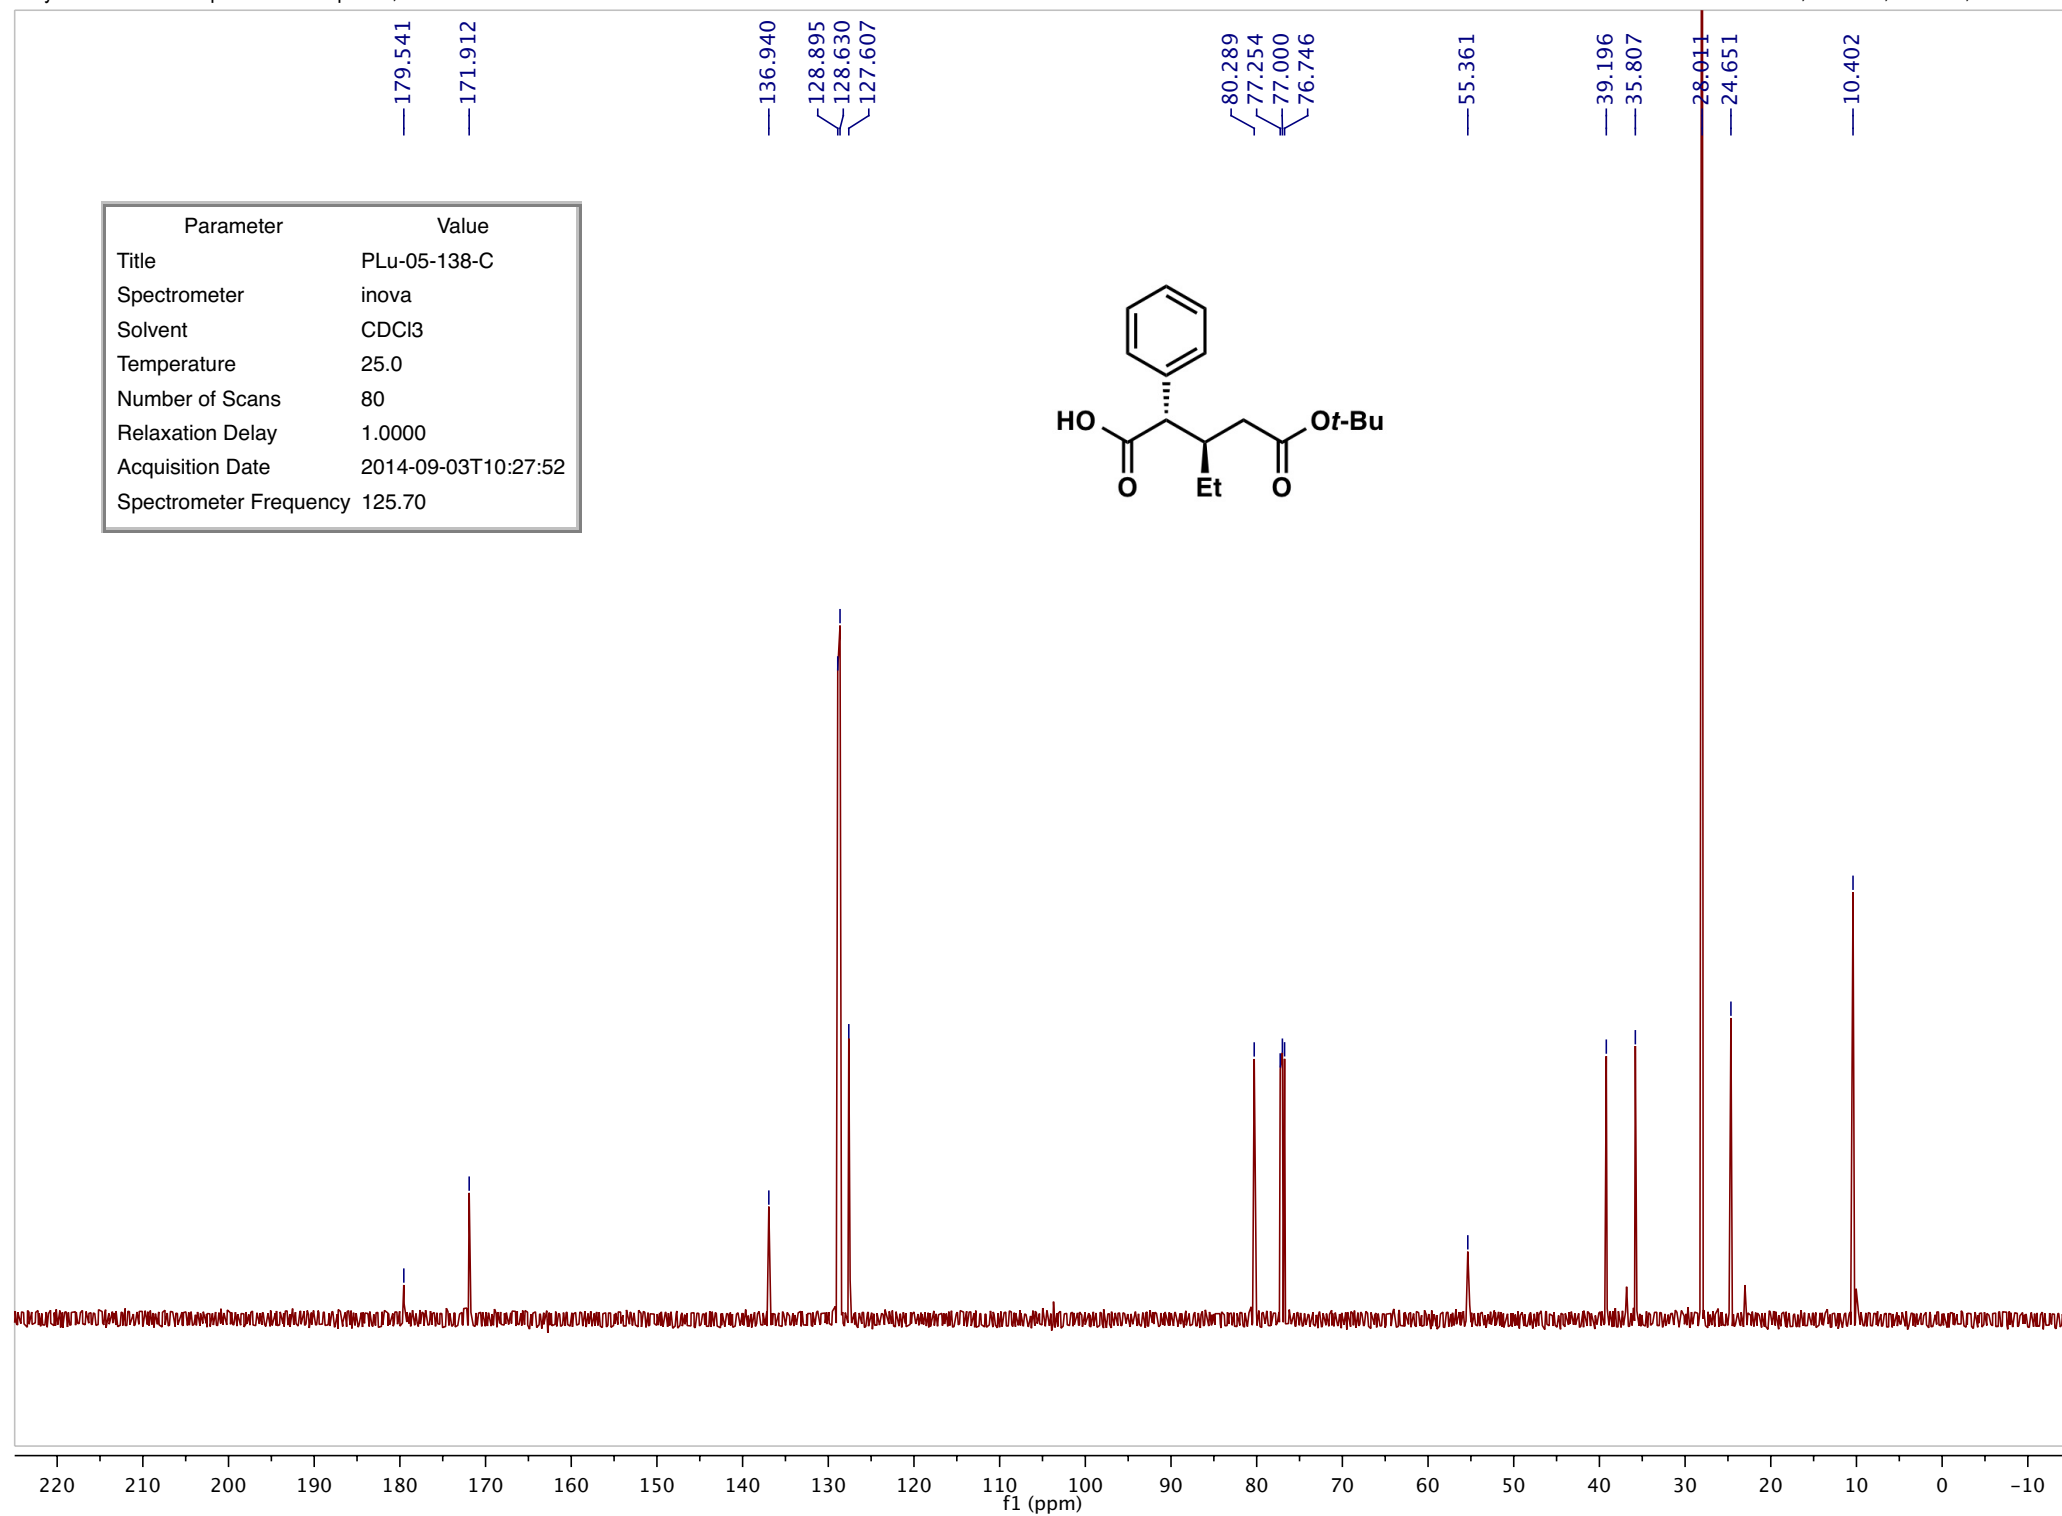

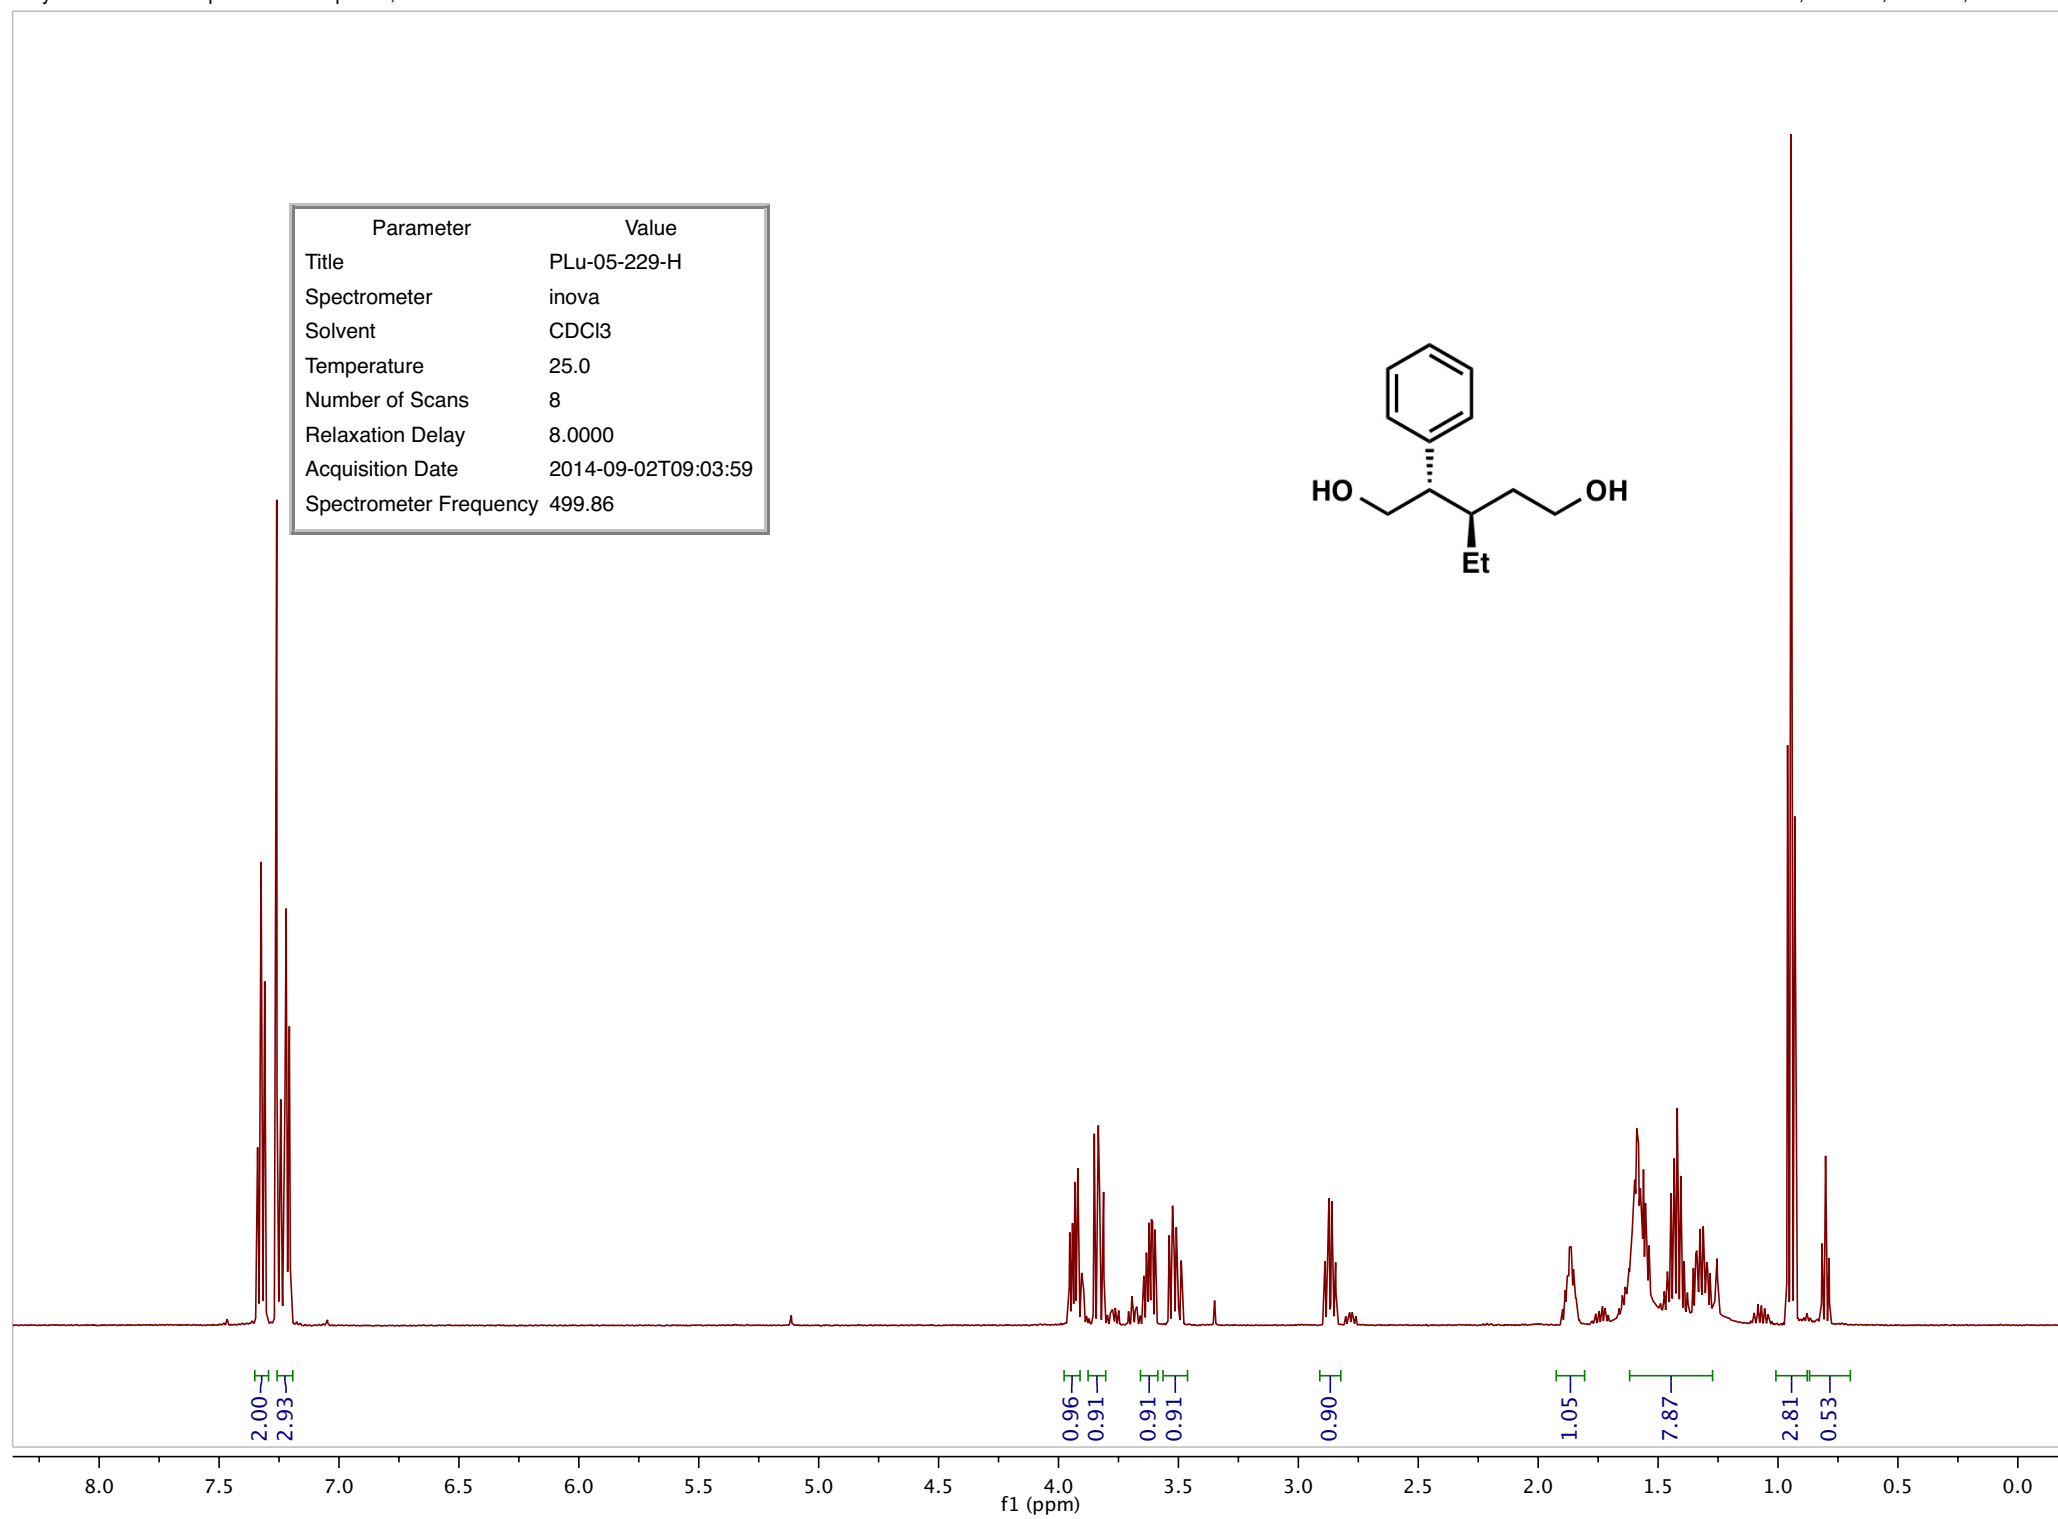

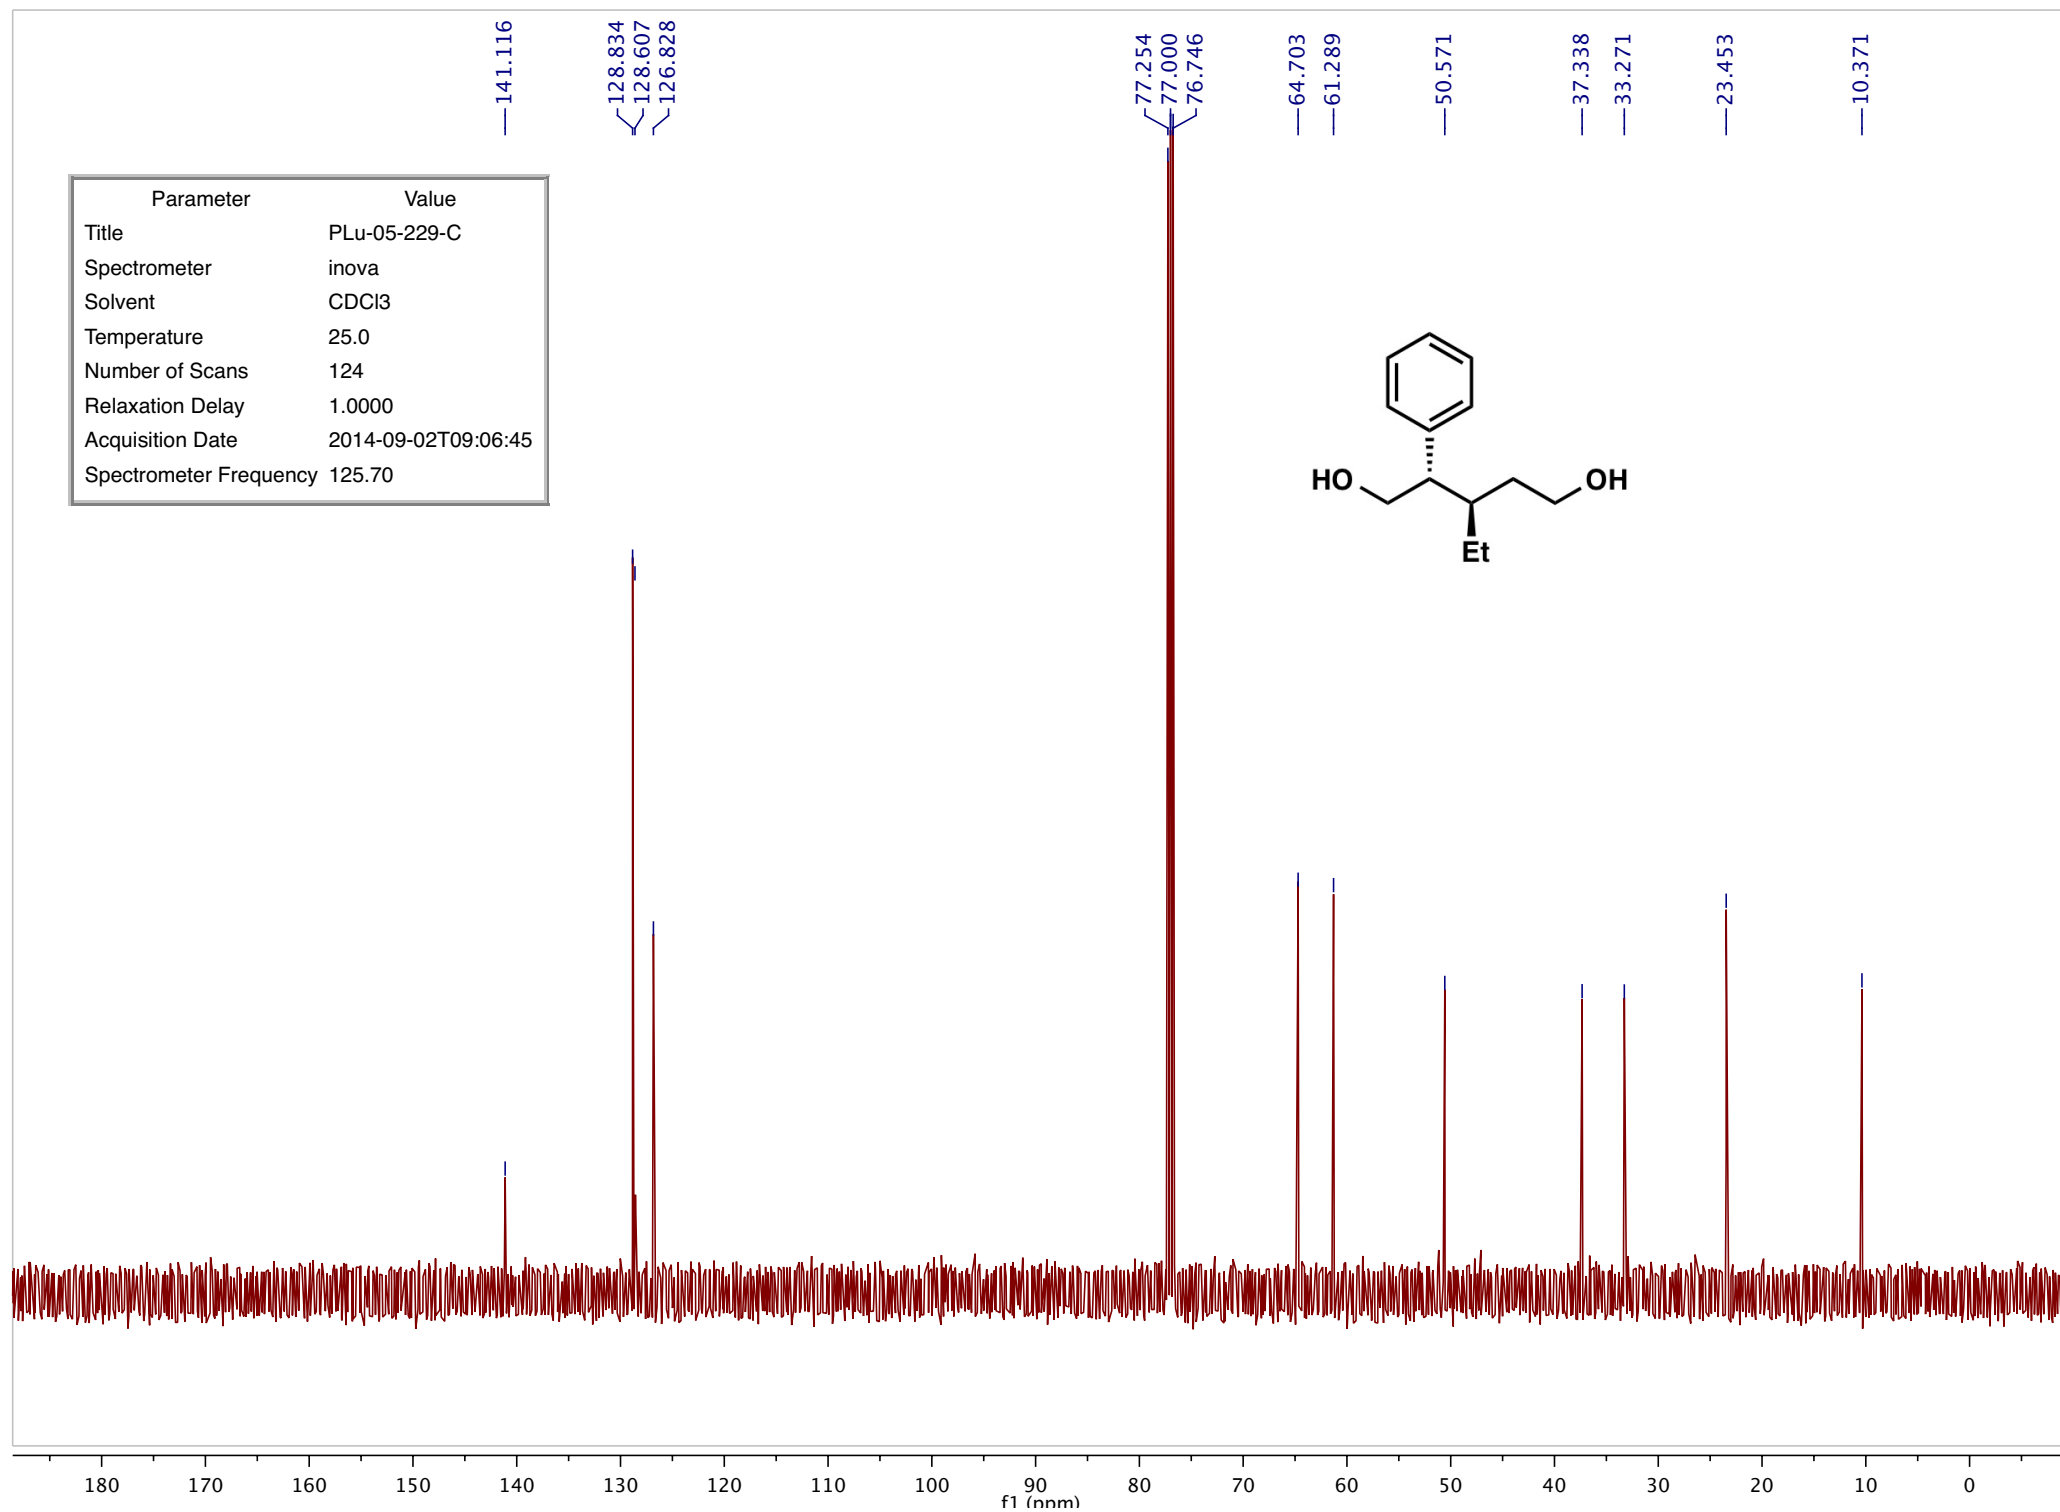

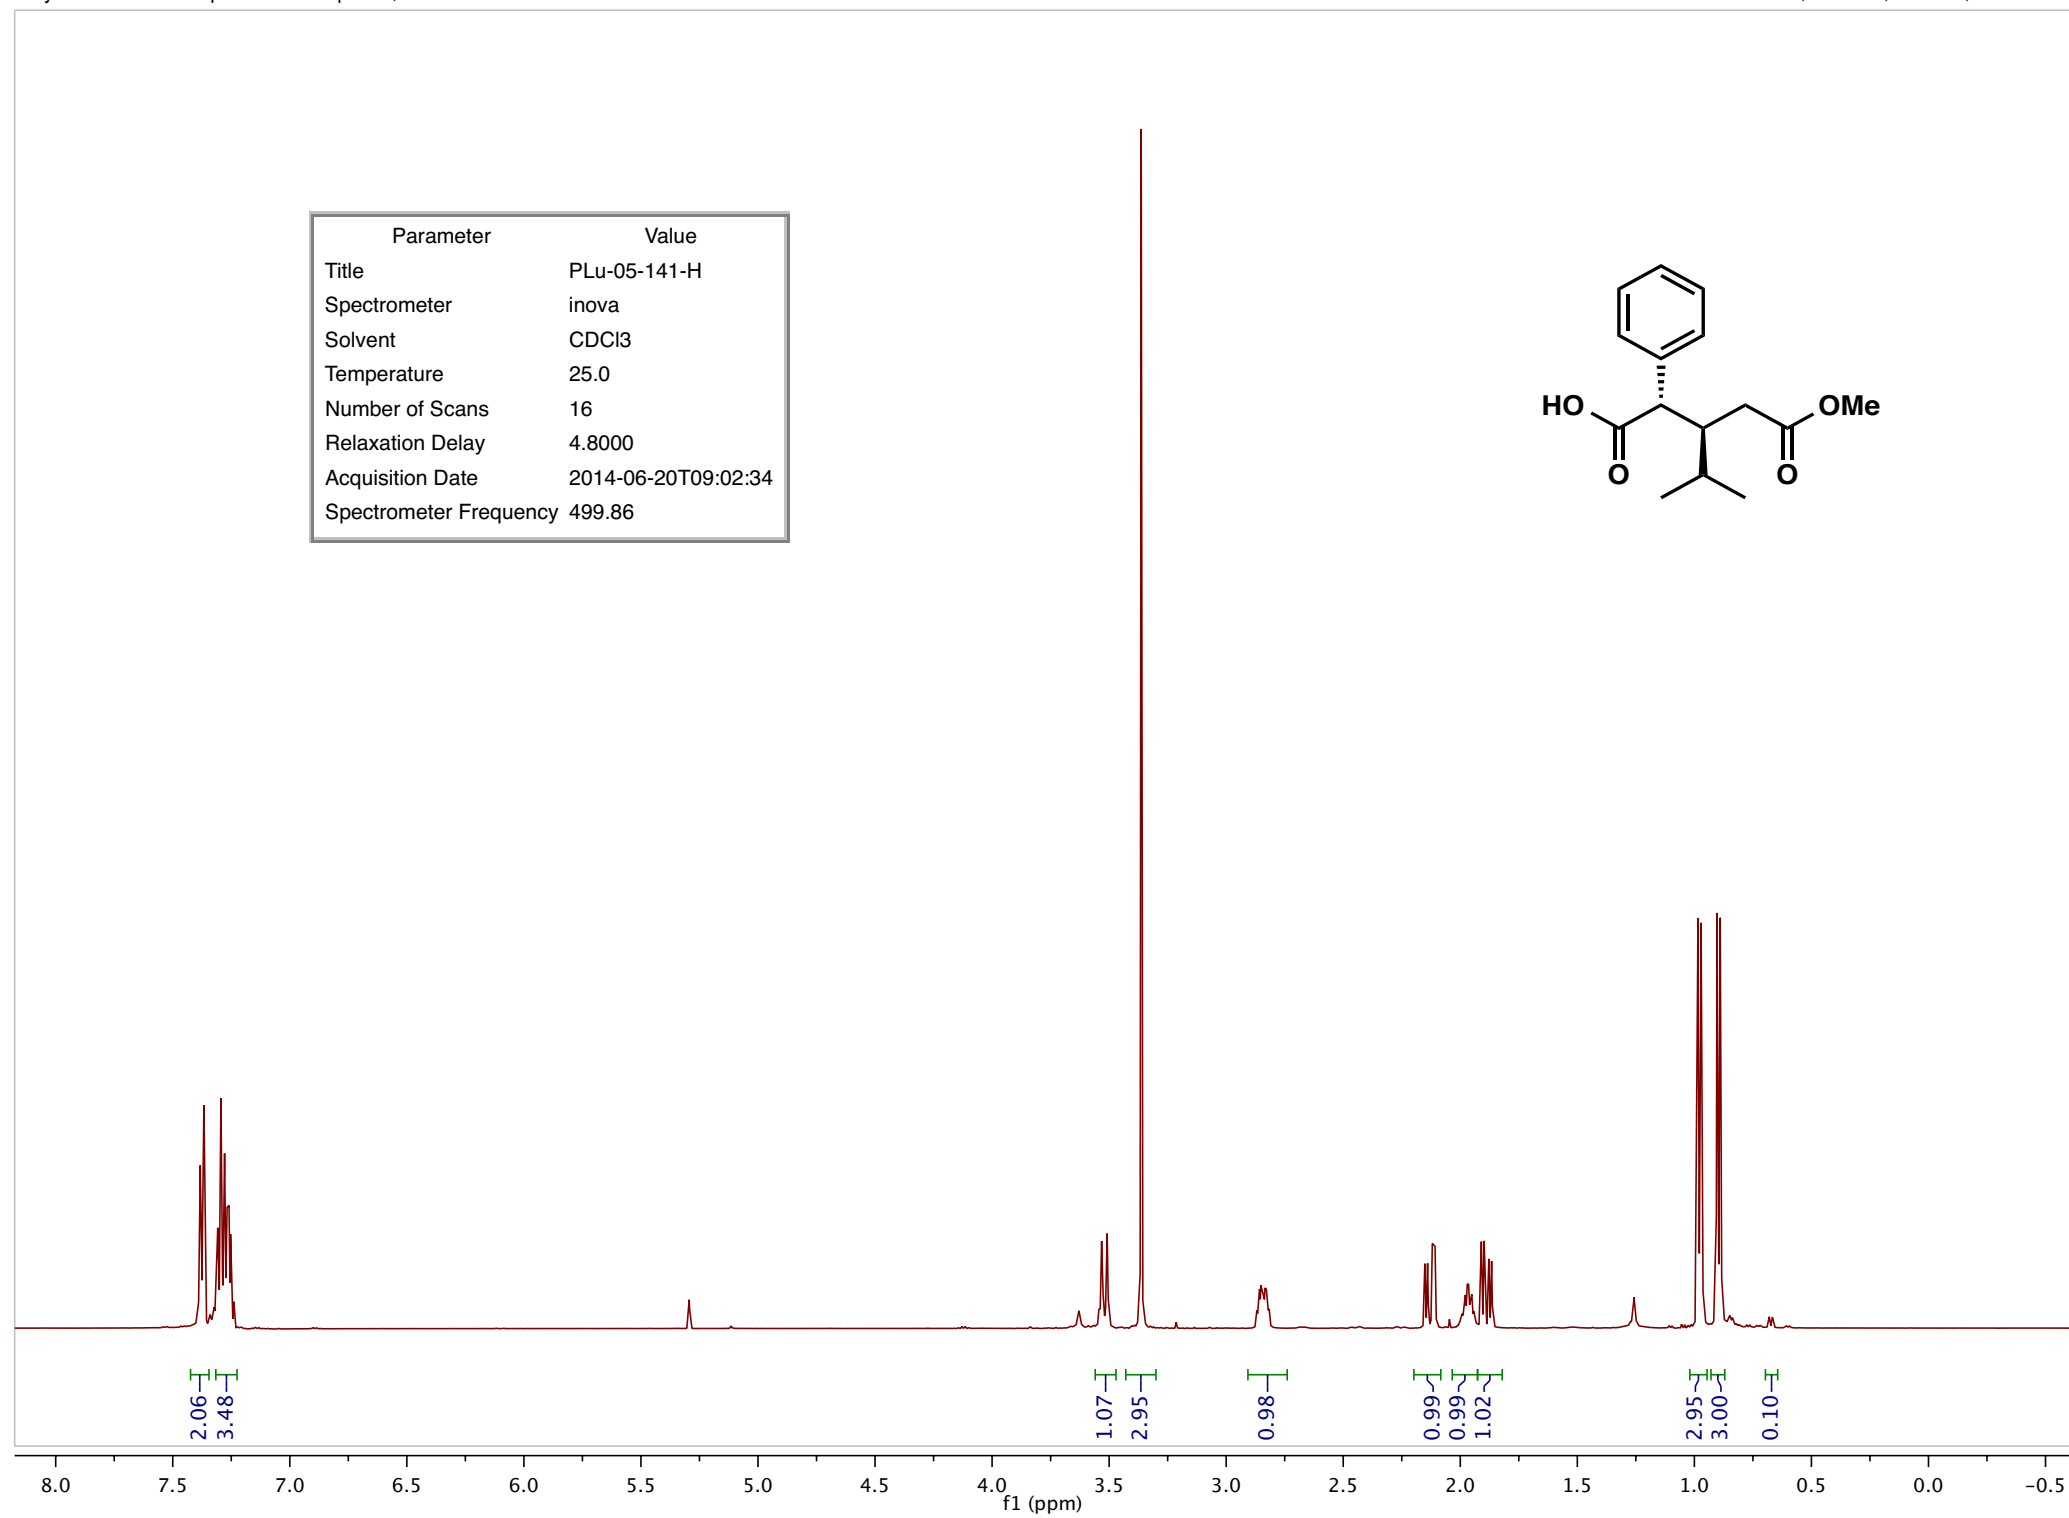

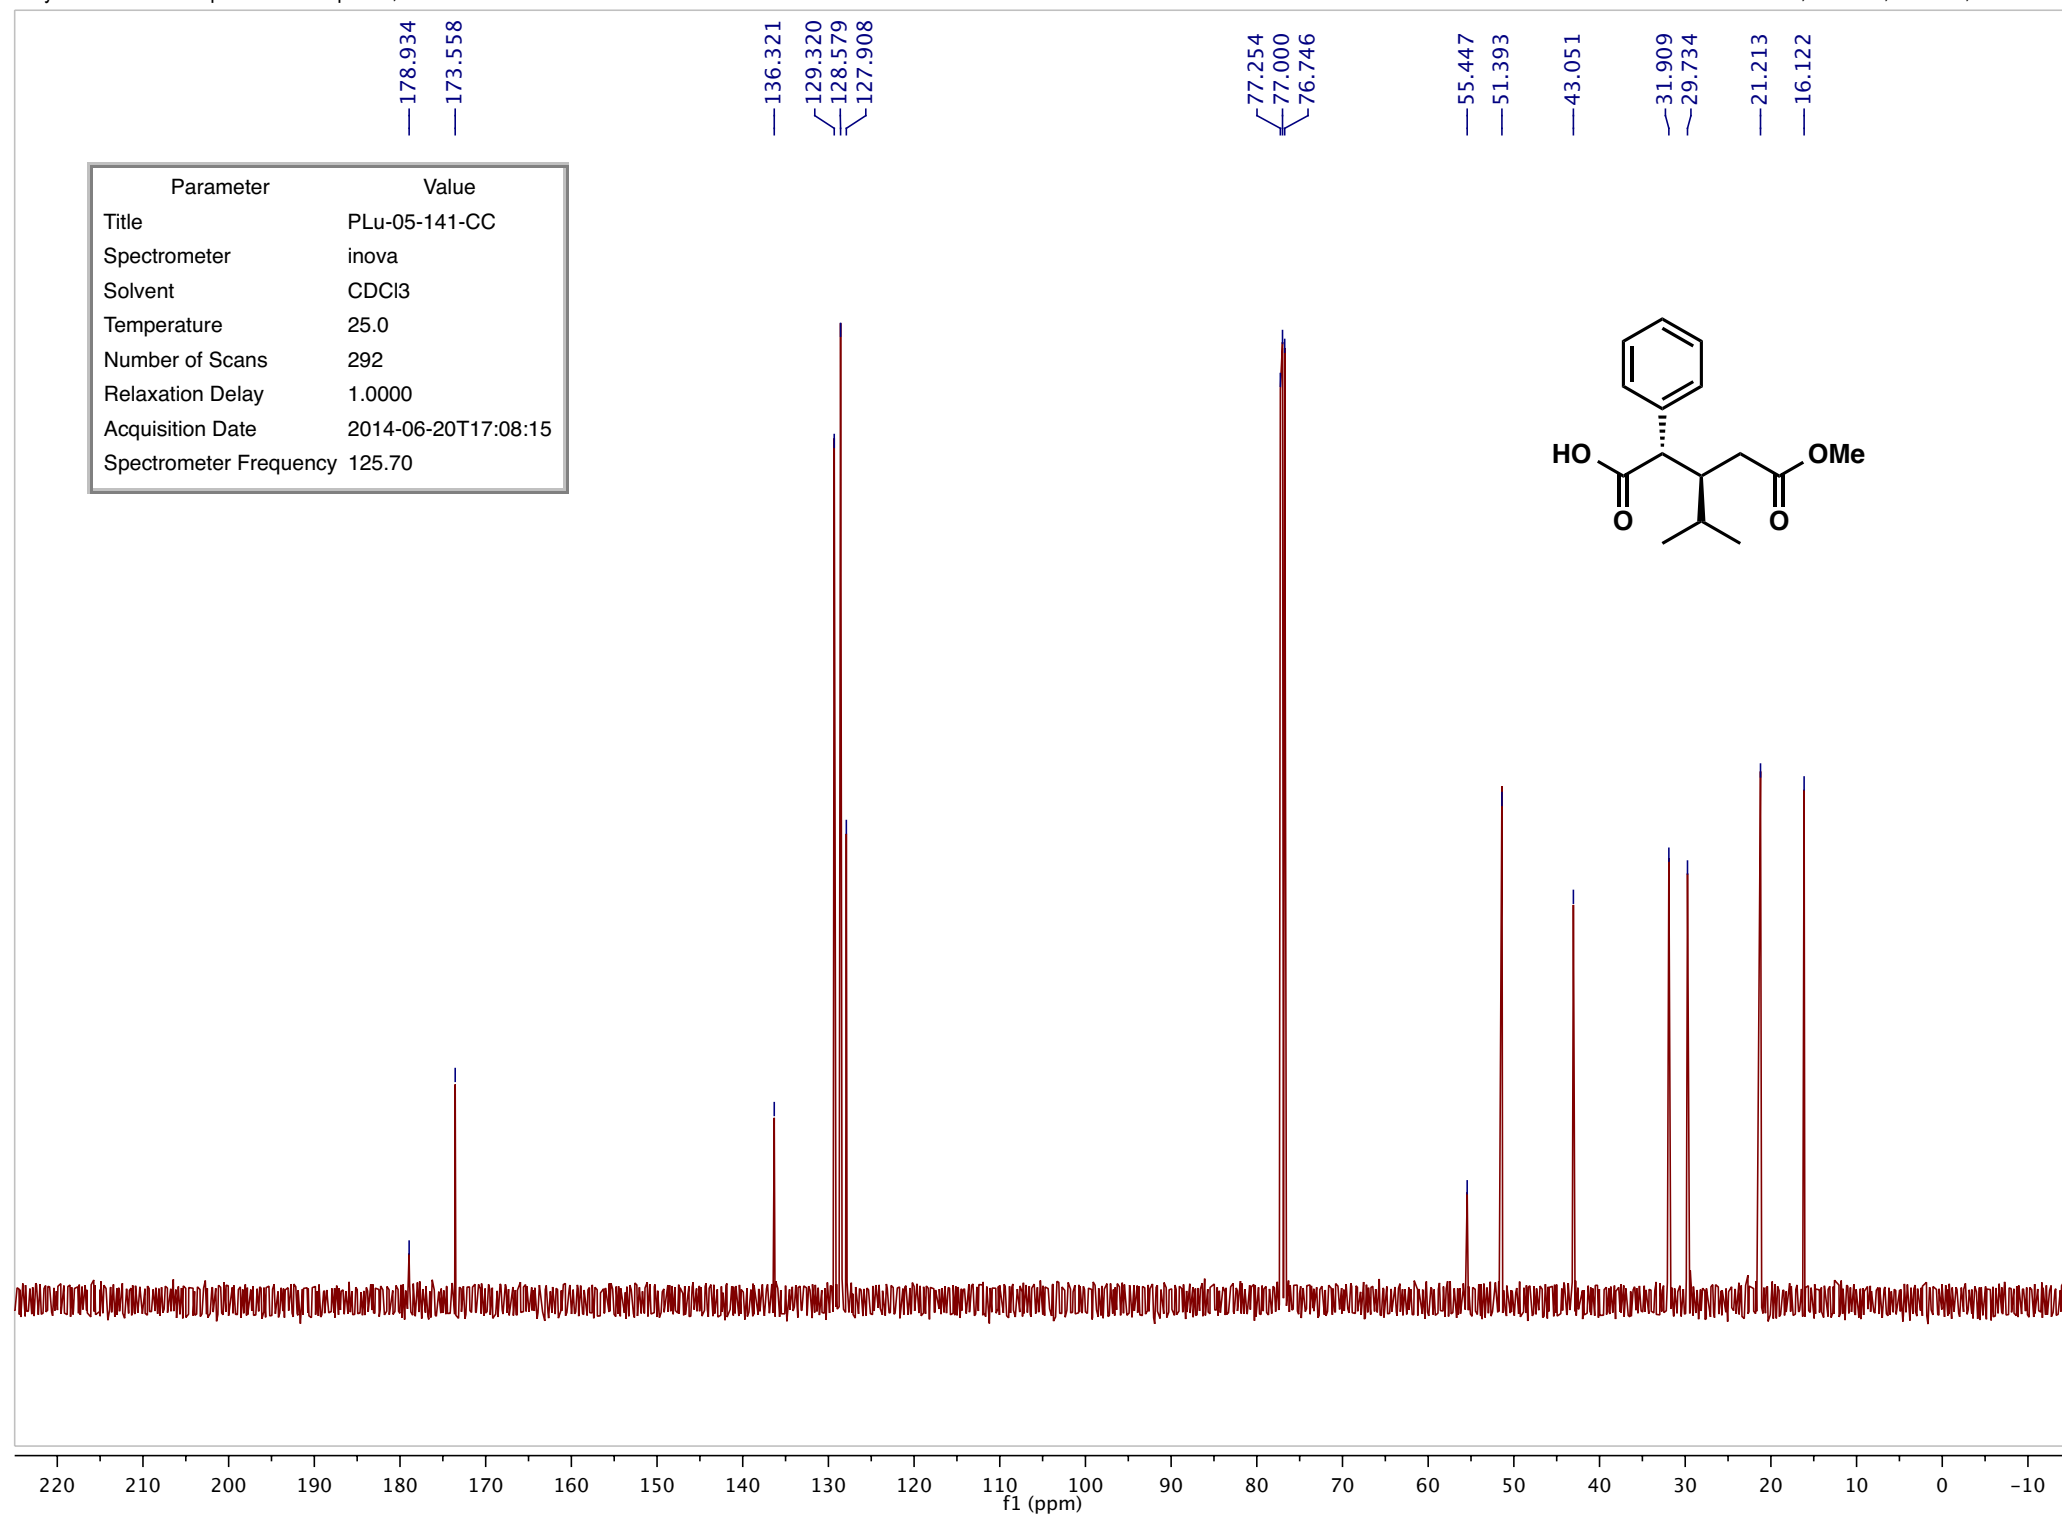

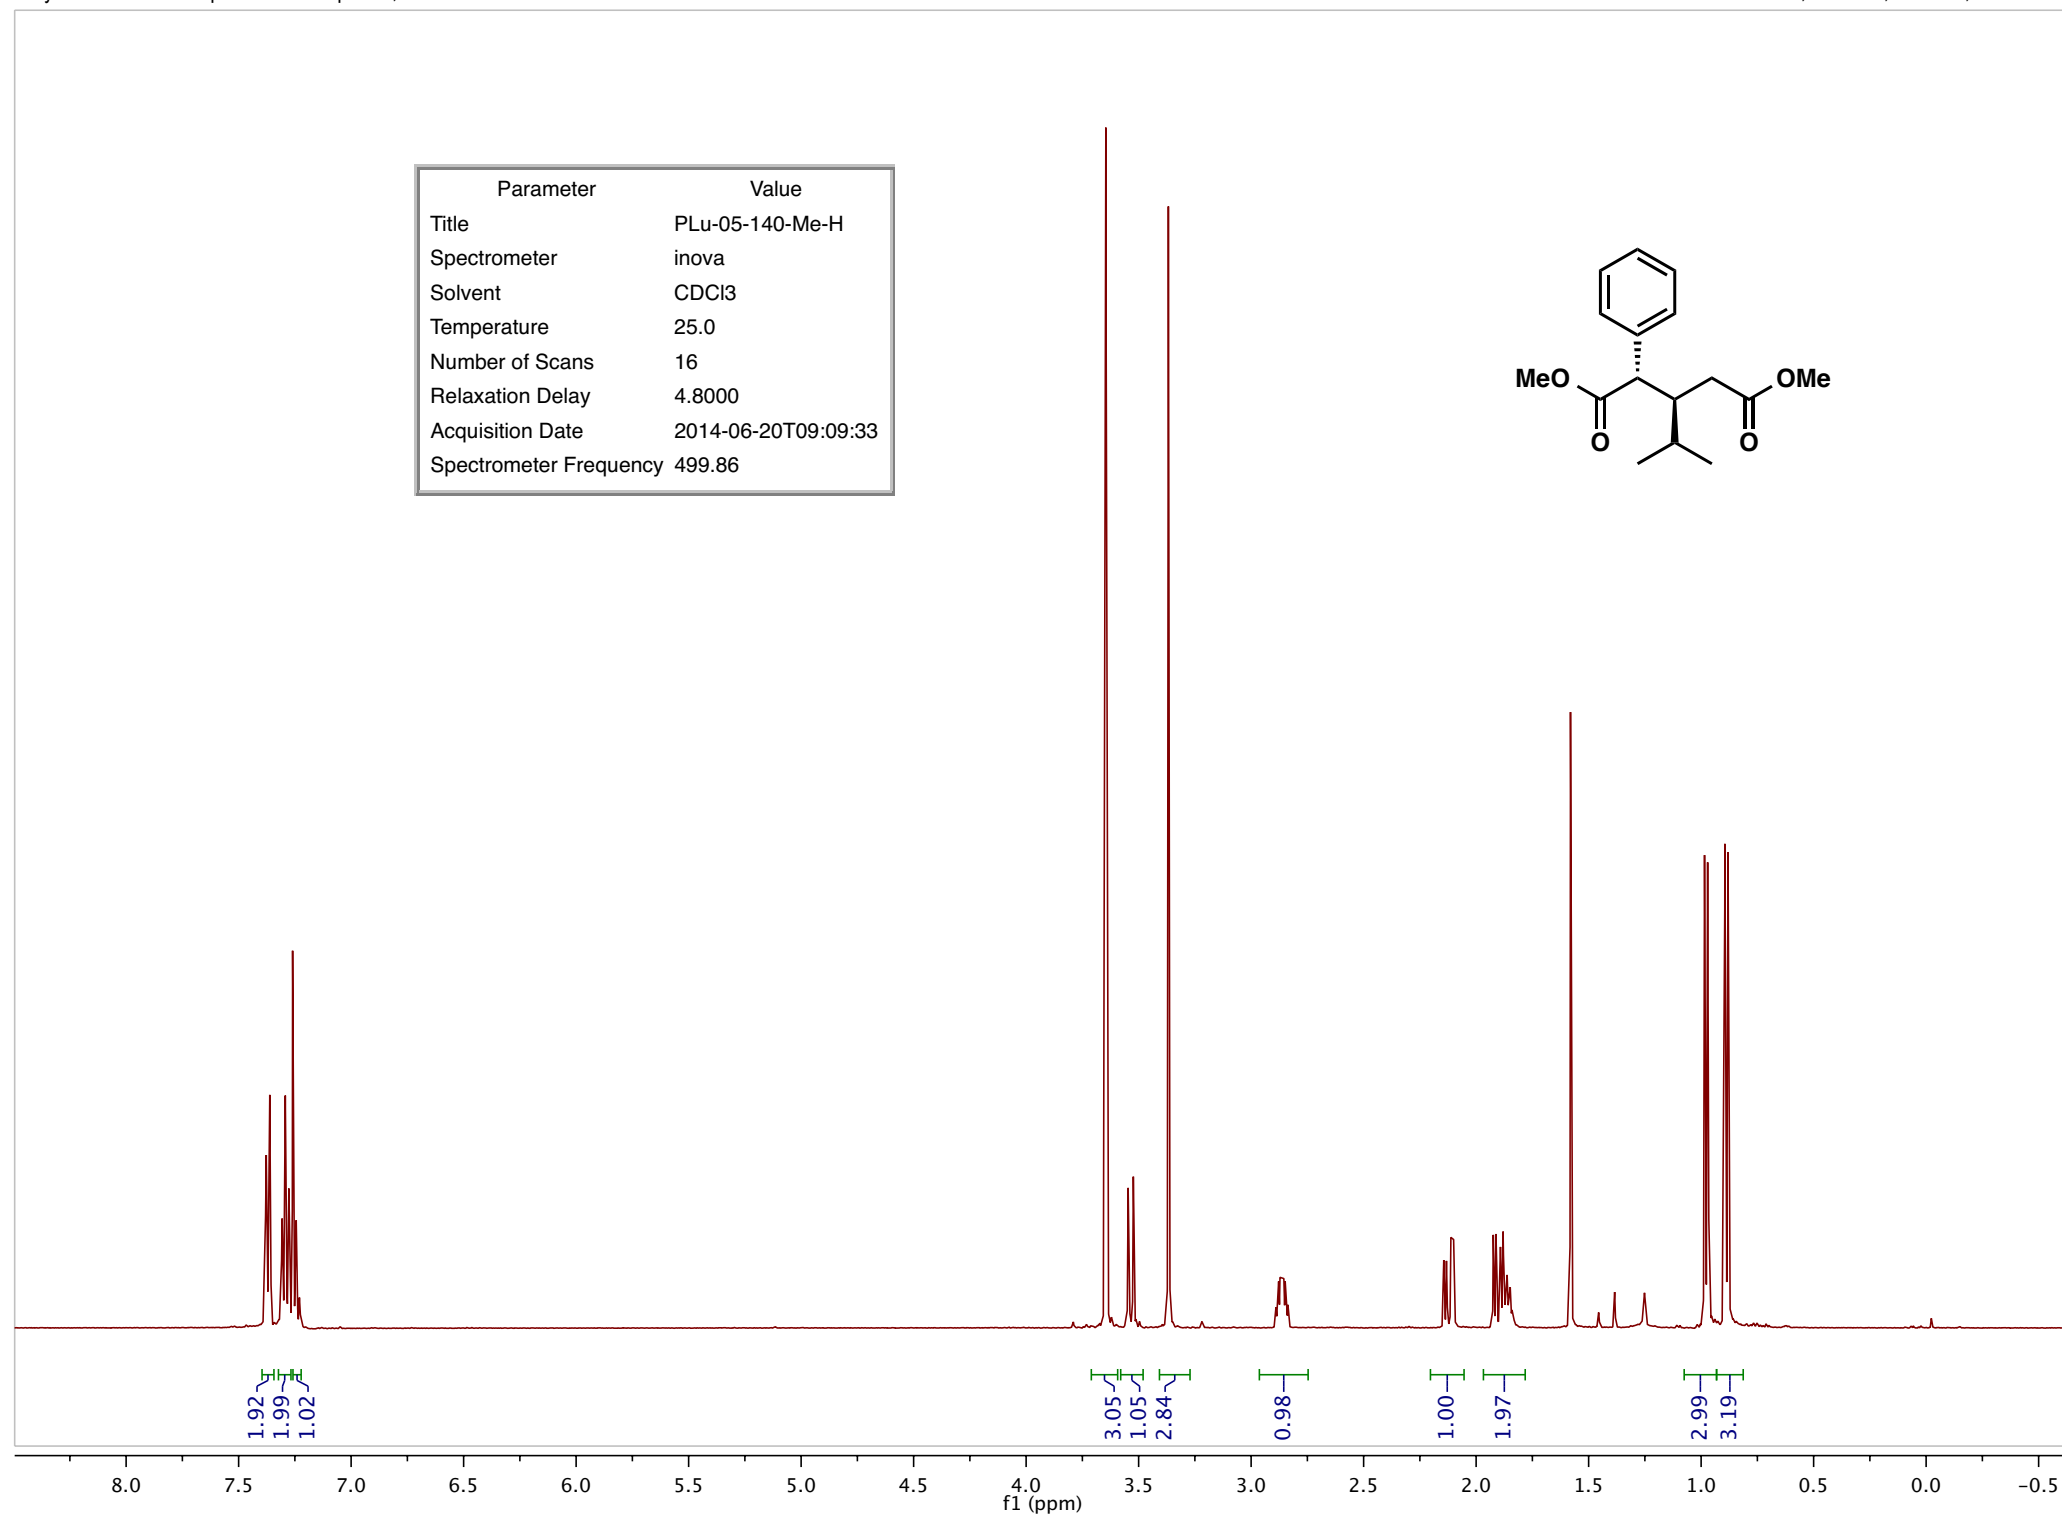

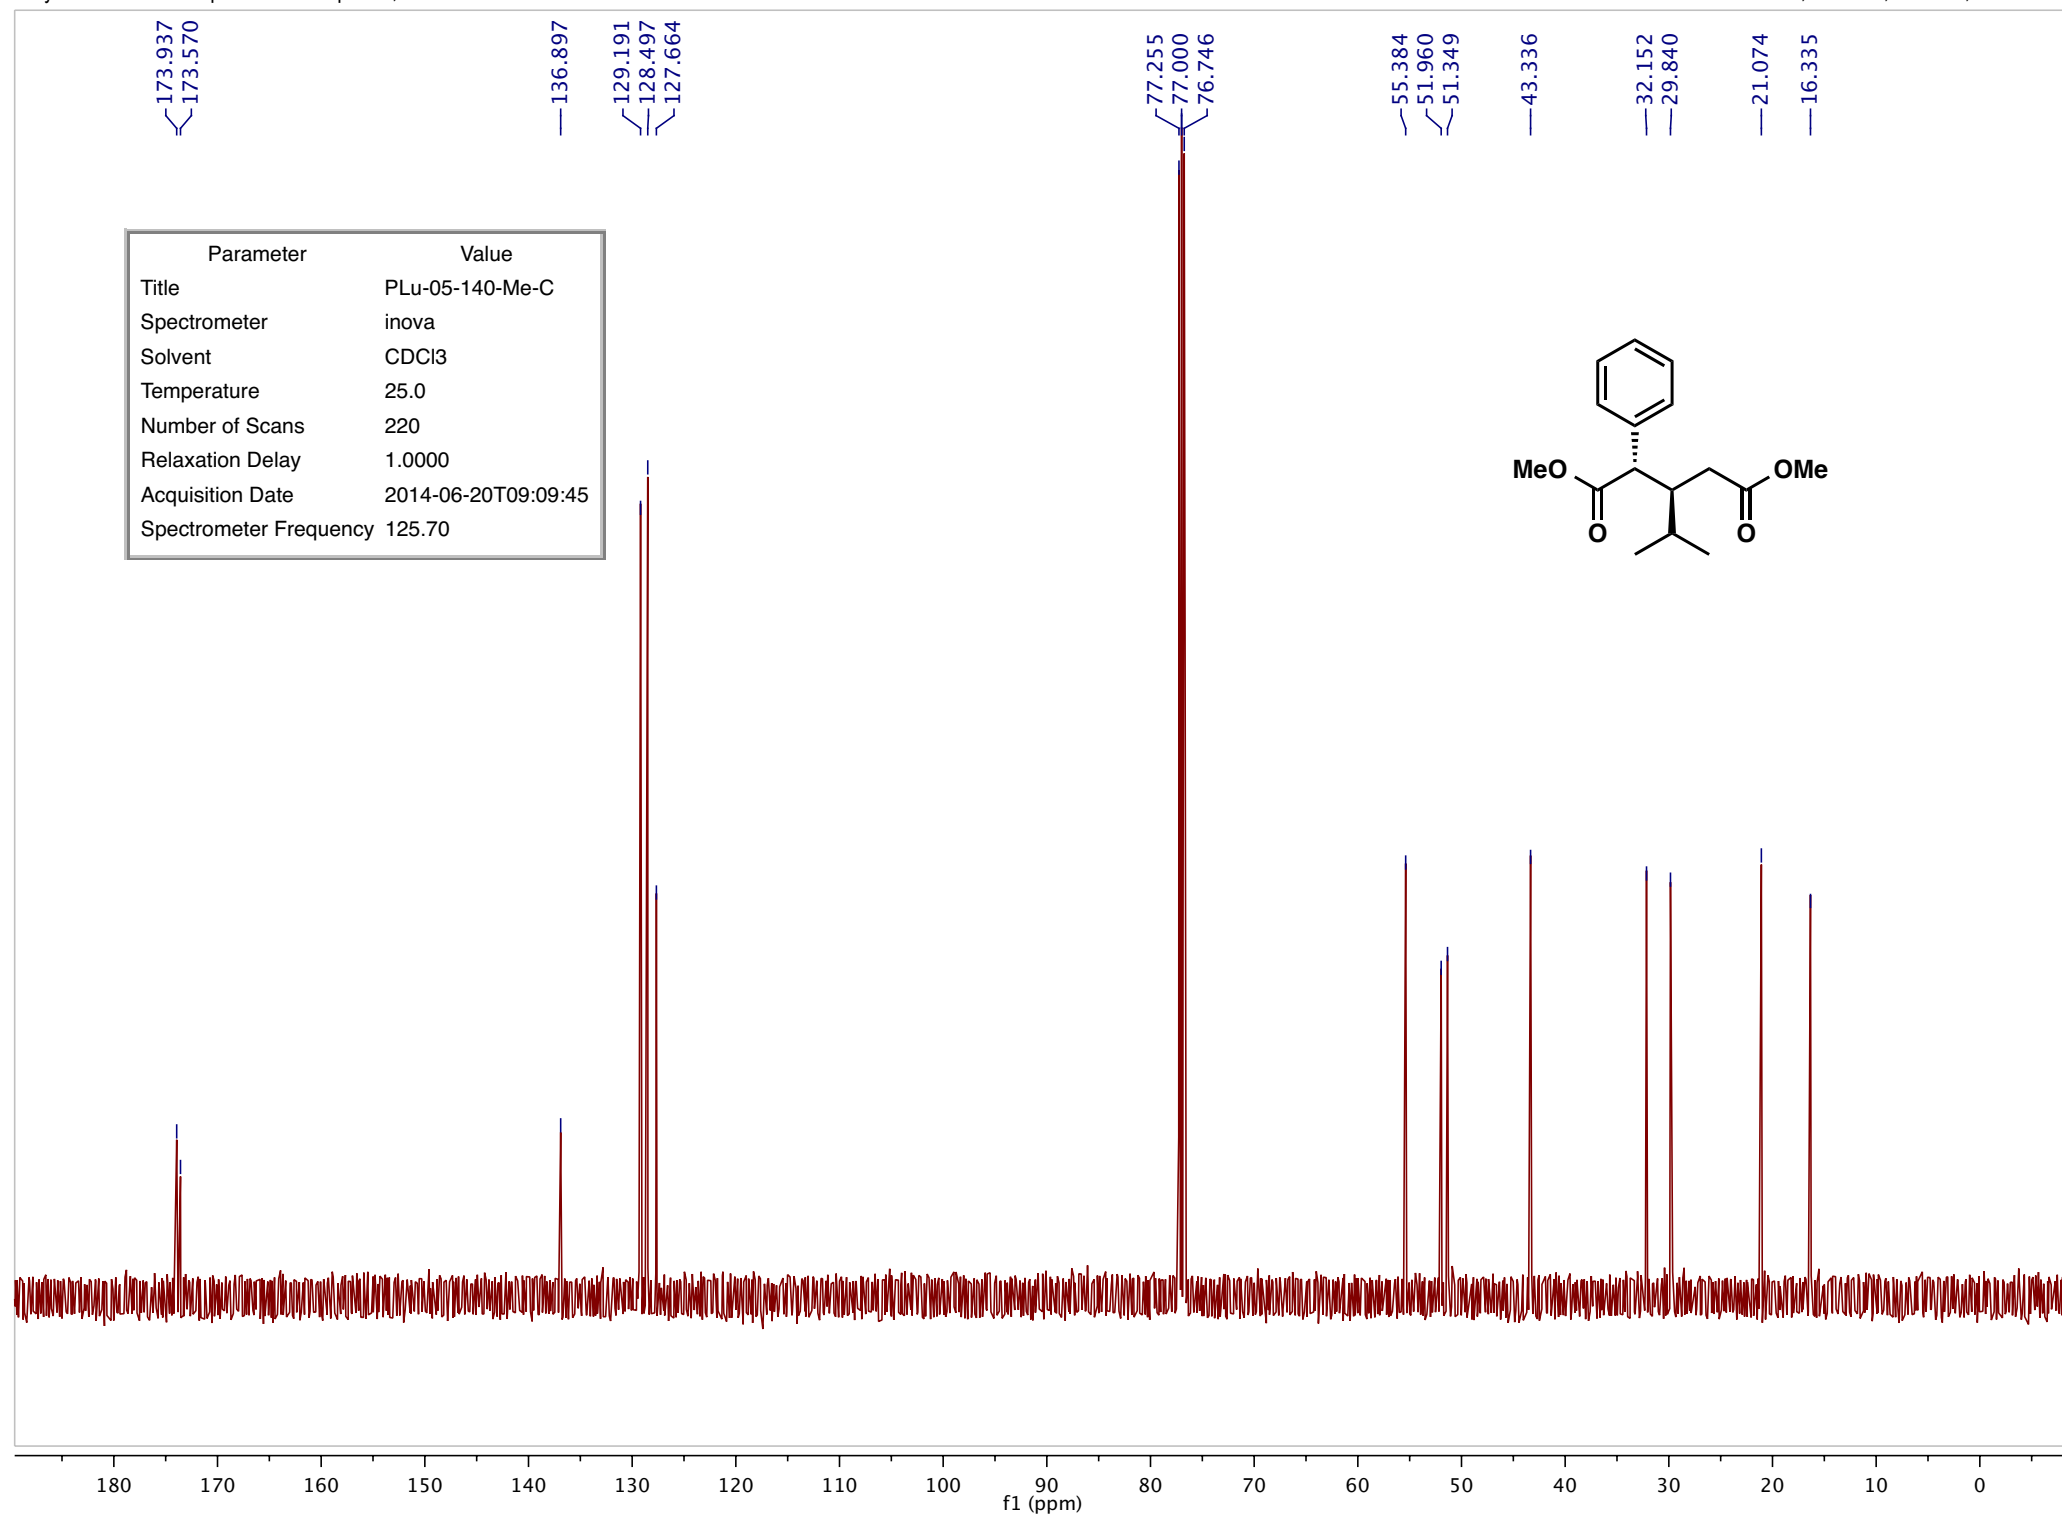

| Parameter              | Value               |
|------------------------|---------------------|
| Title                  | PLu-05-142-H        |
| Spectrometer           | inova               |
| Solvent                | CDCl <sub>3</sub>   |
| Temperature            | 25.0                |
| Number of Scans        | 16                  |
| Relaxation Delay       | 4.8000              |
| Acquisition Date       | 2014-06-21T09:23:55 |
| Spectrometer Frequency | 499.86              |

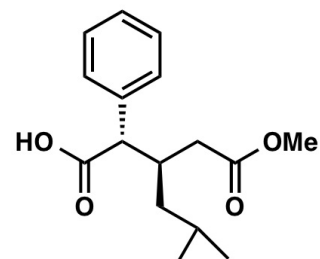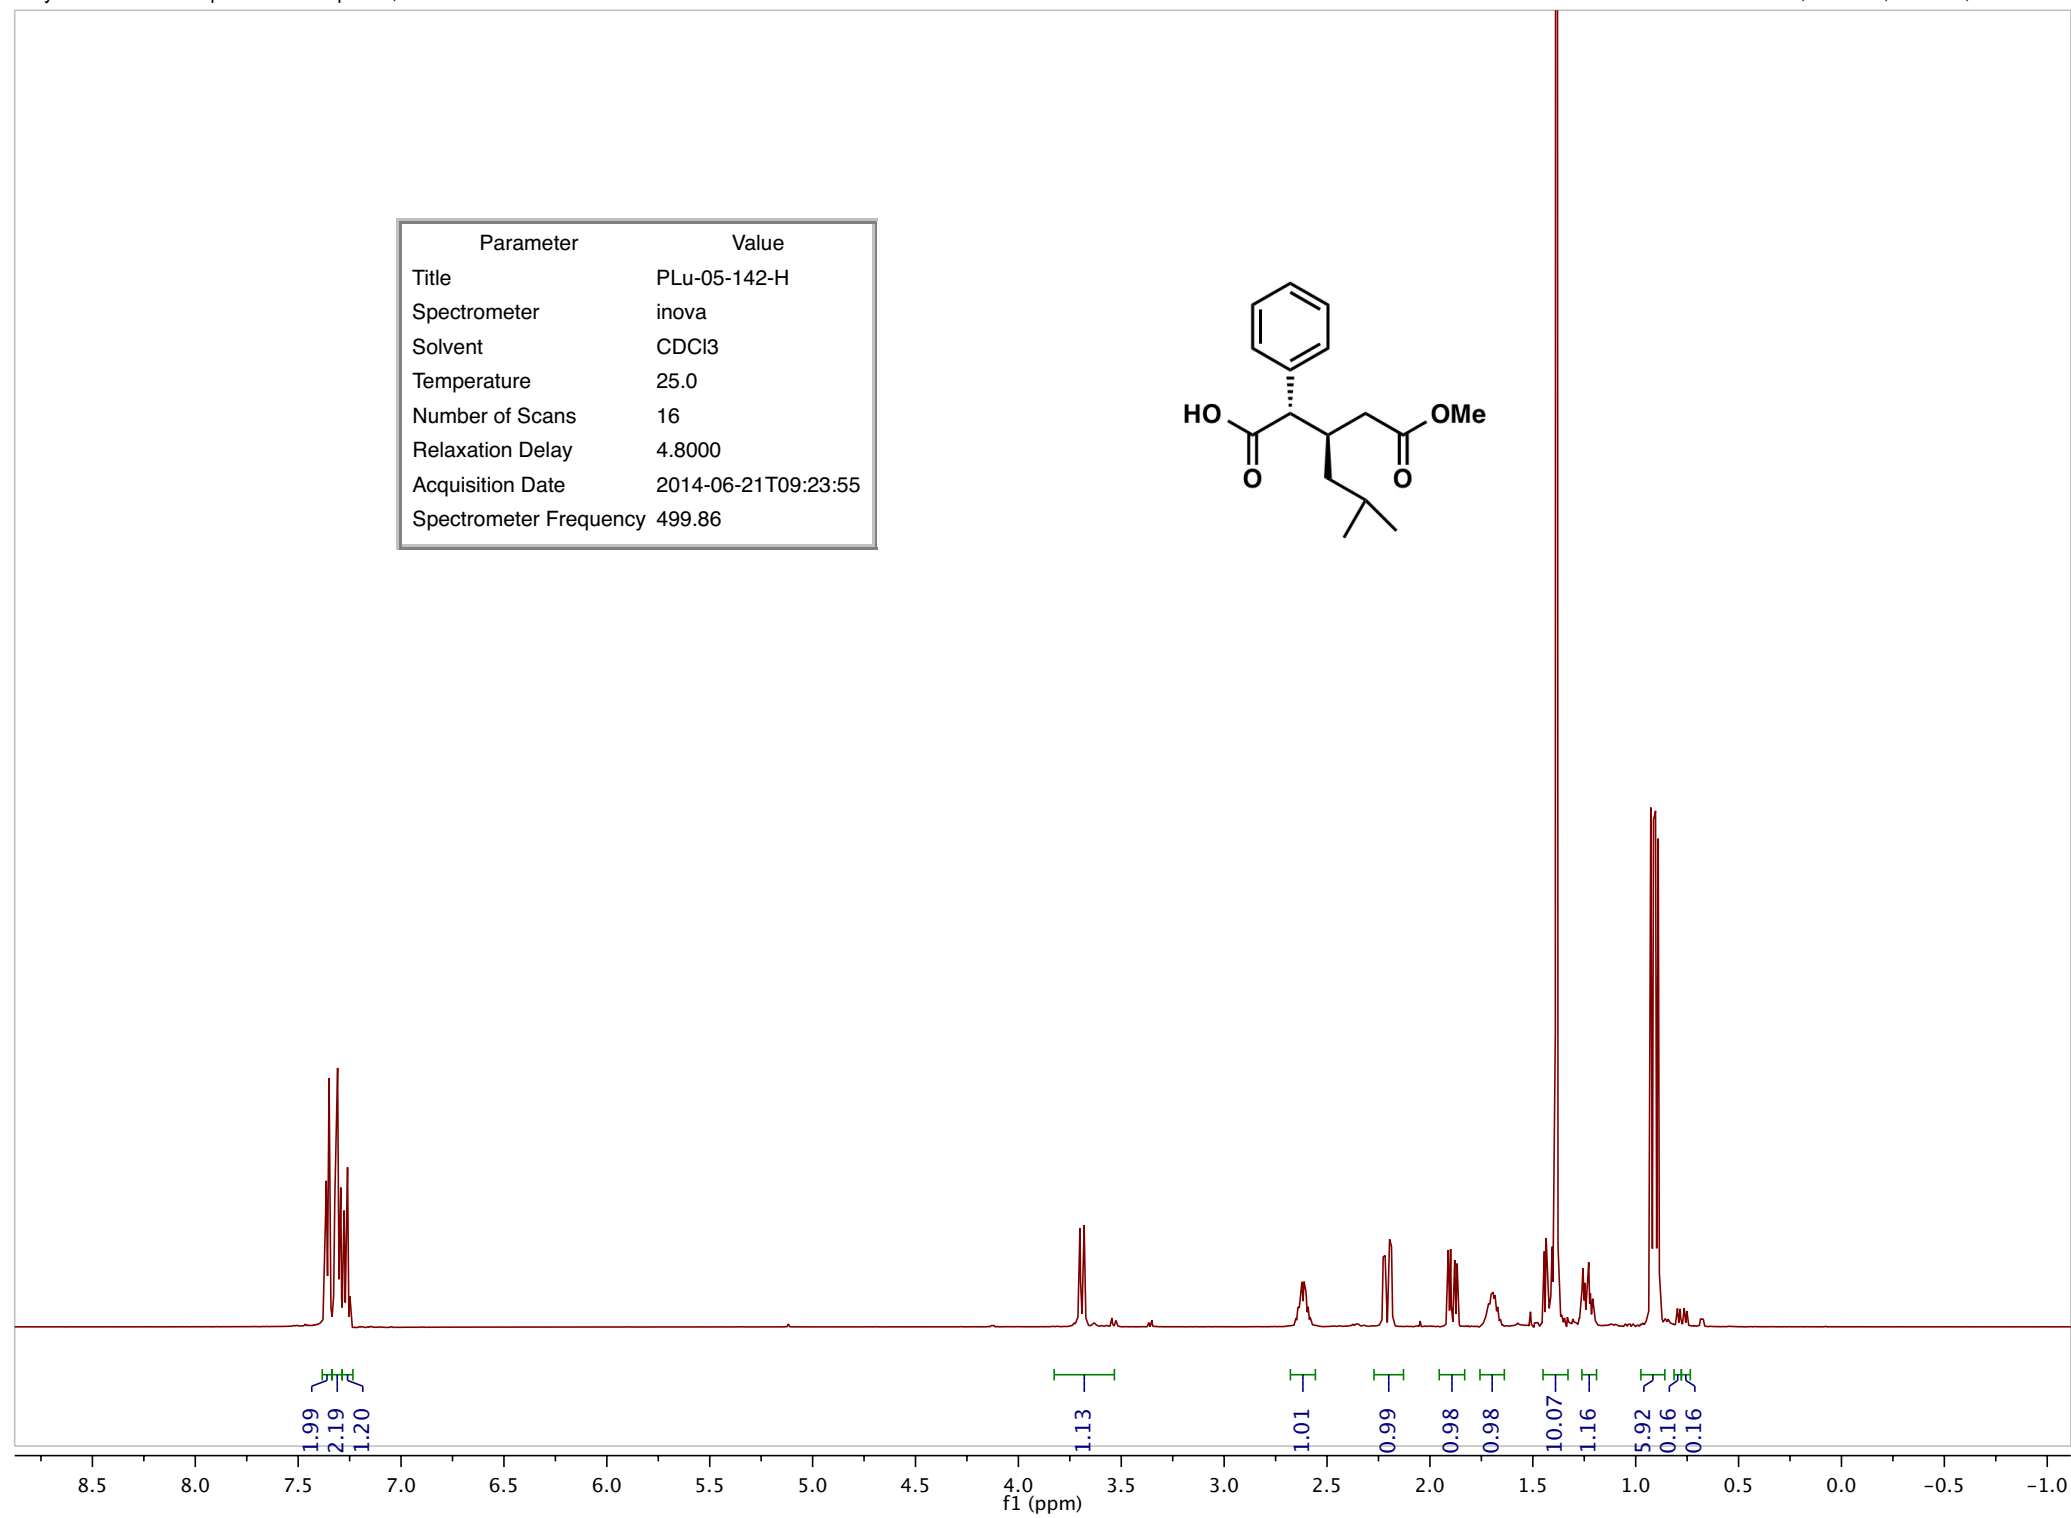



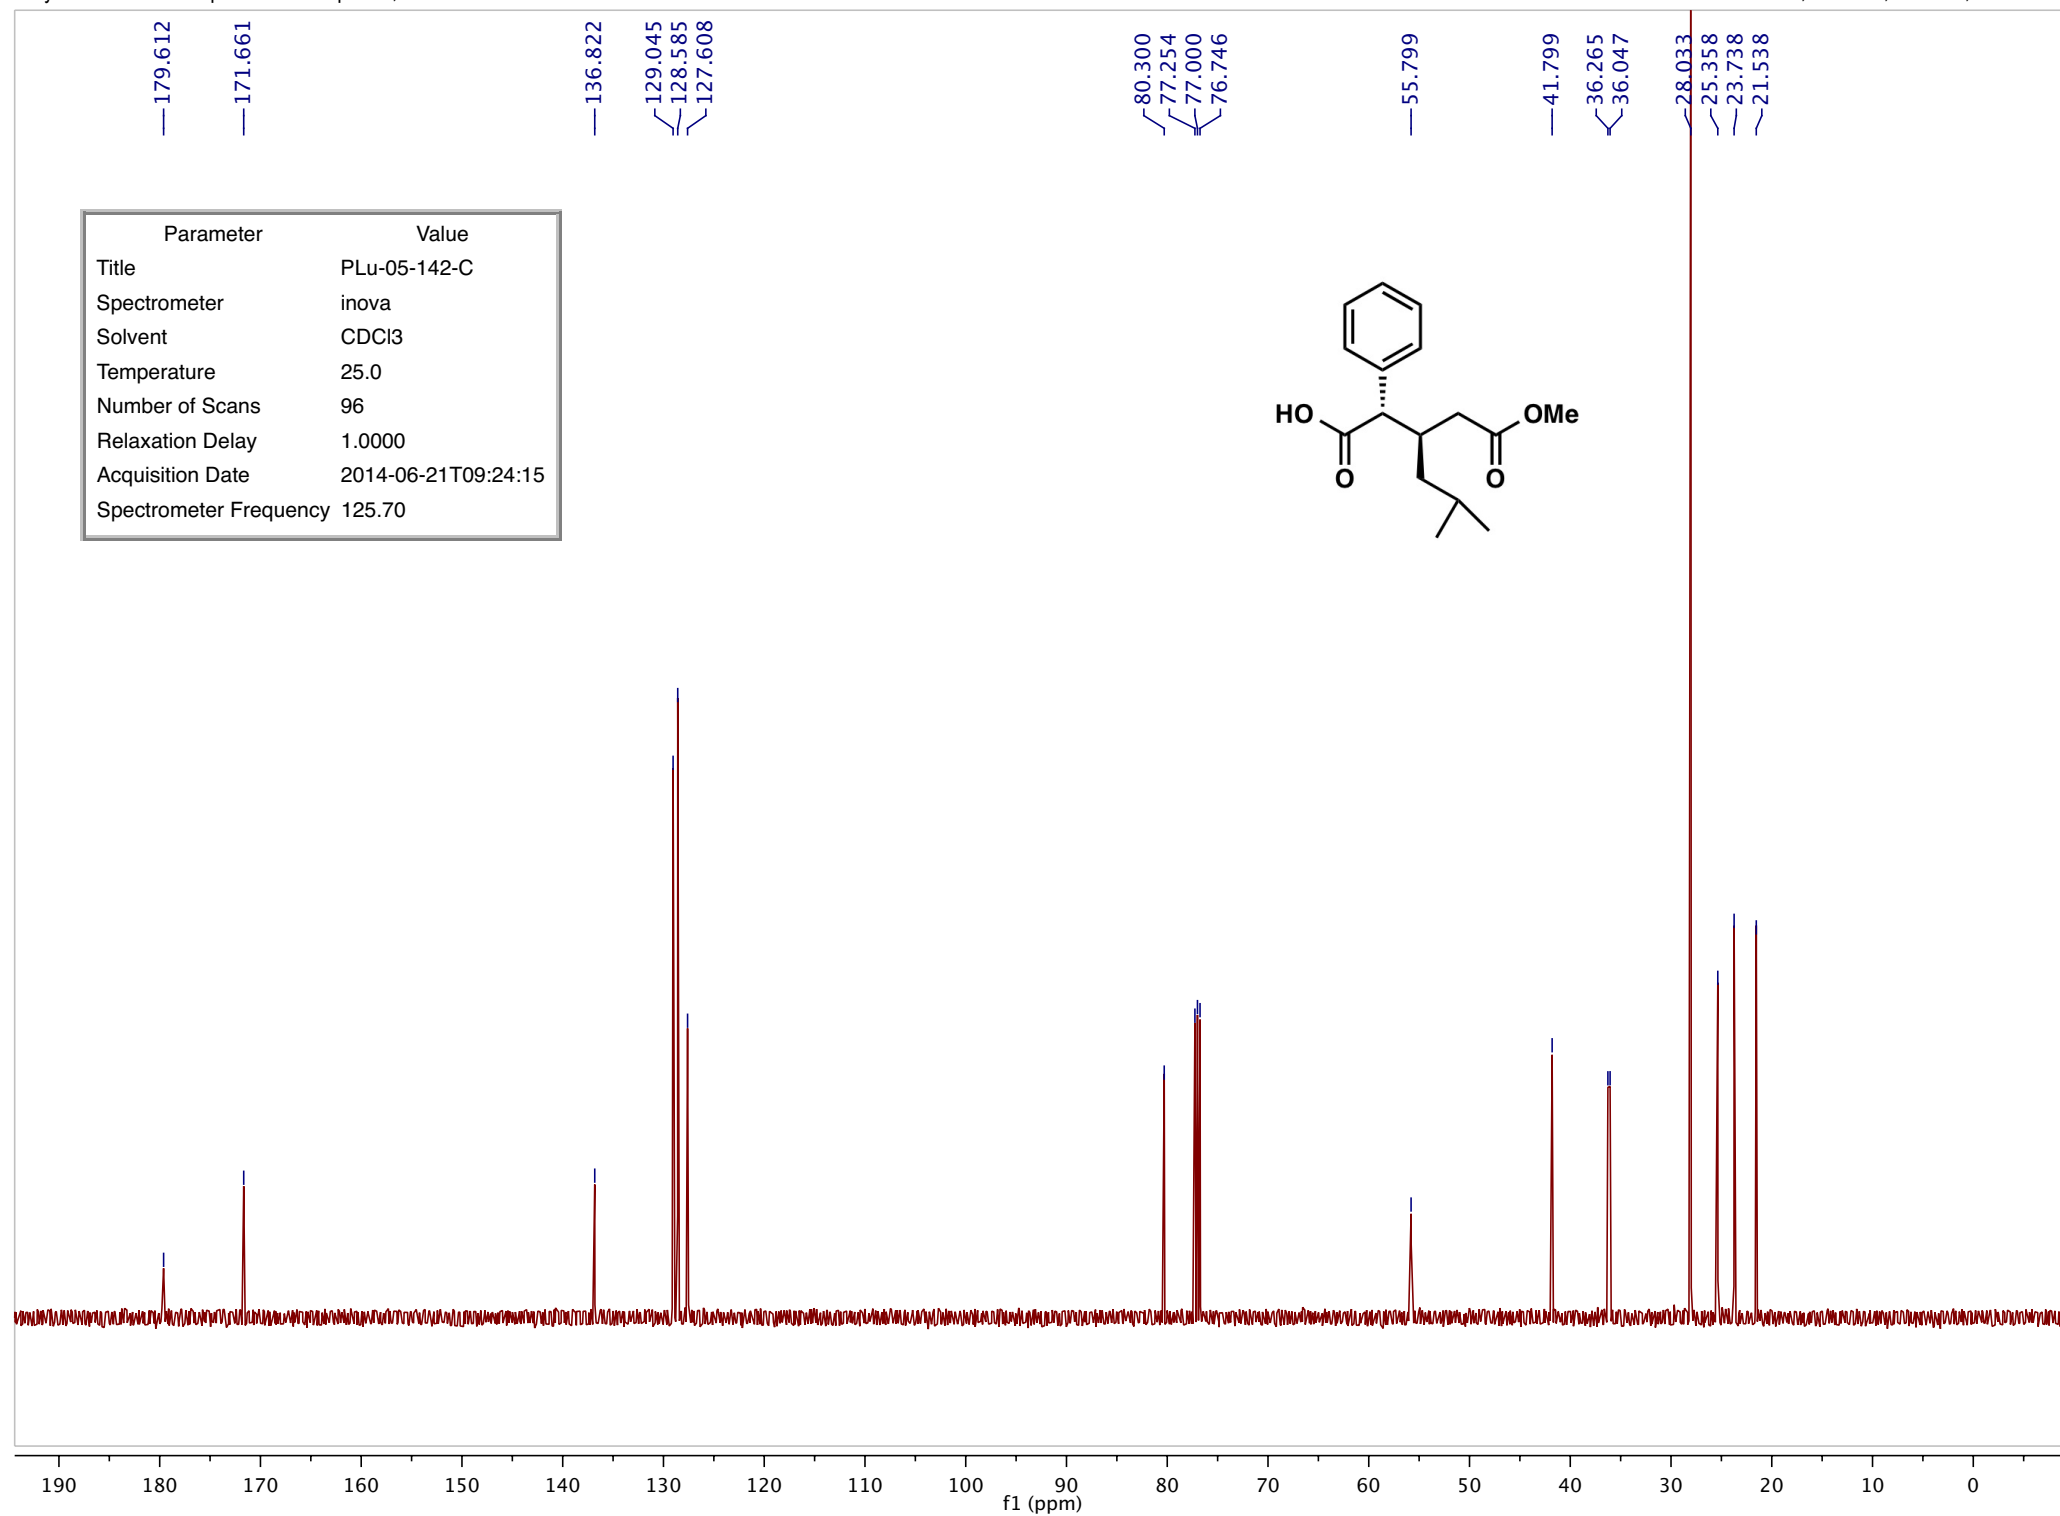

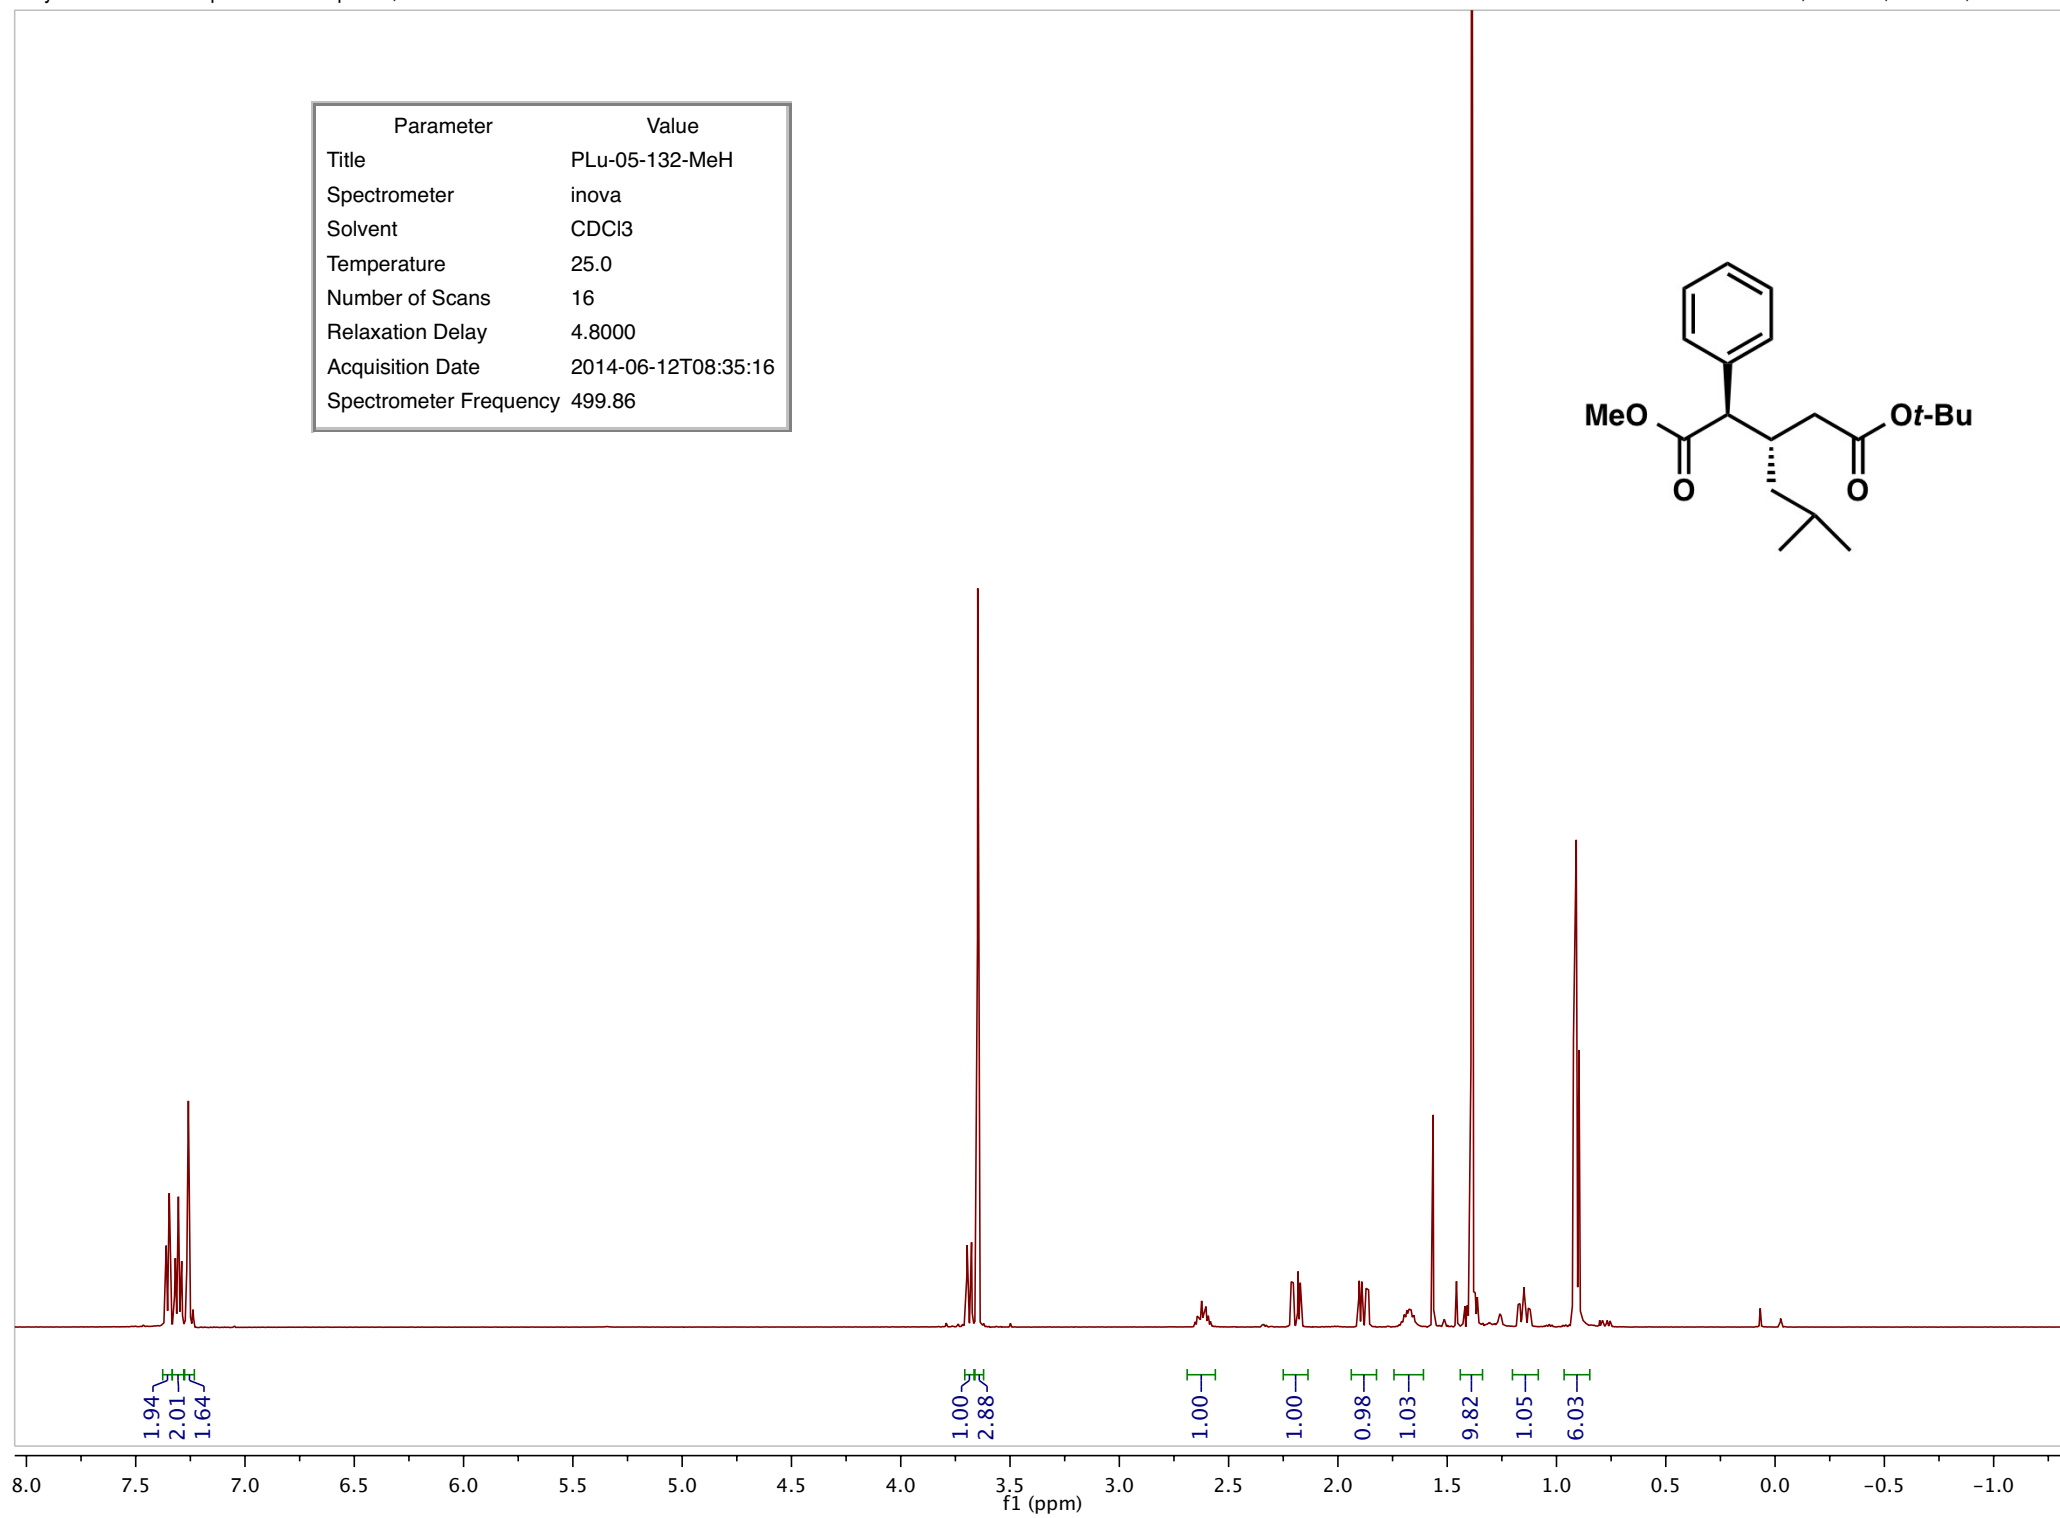

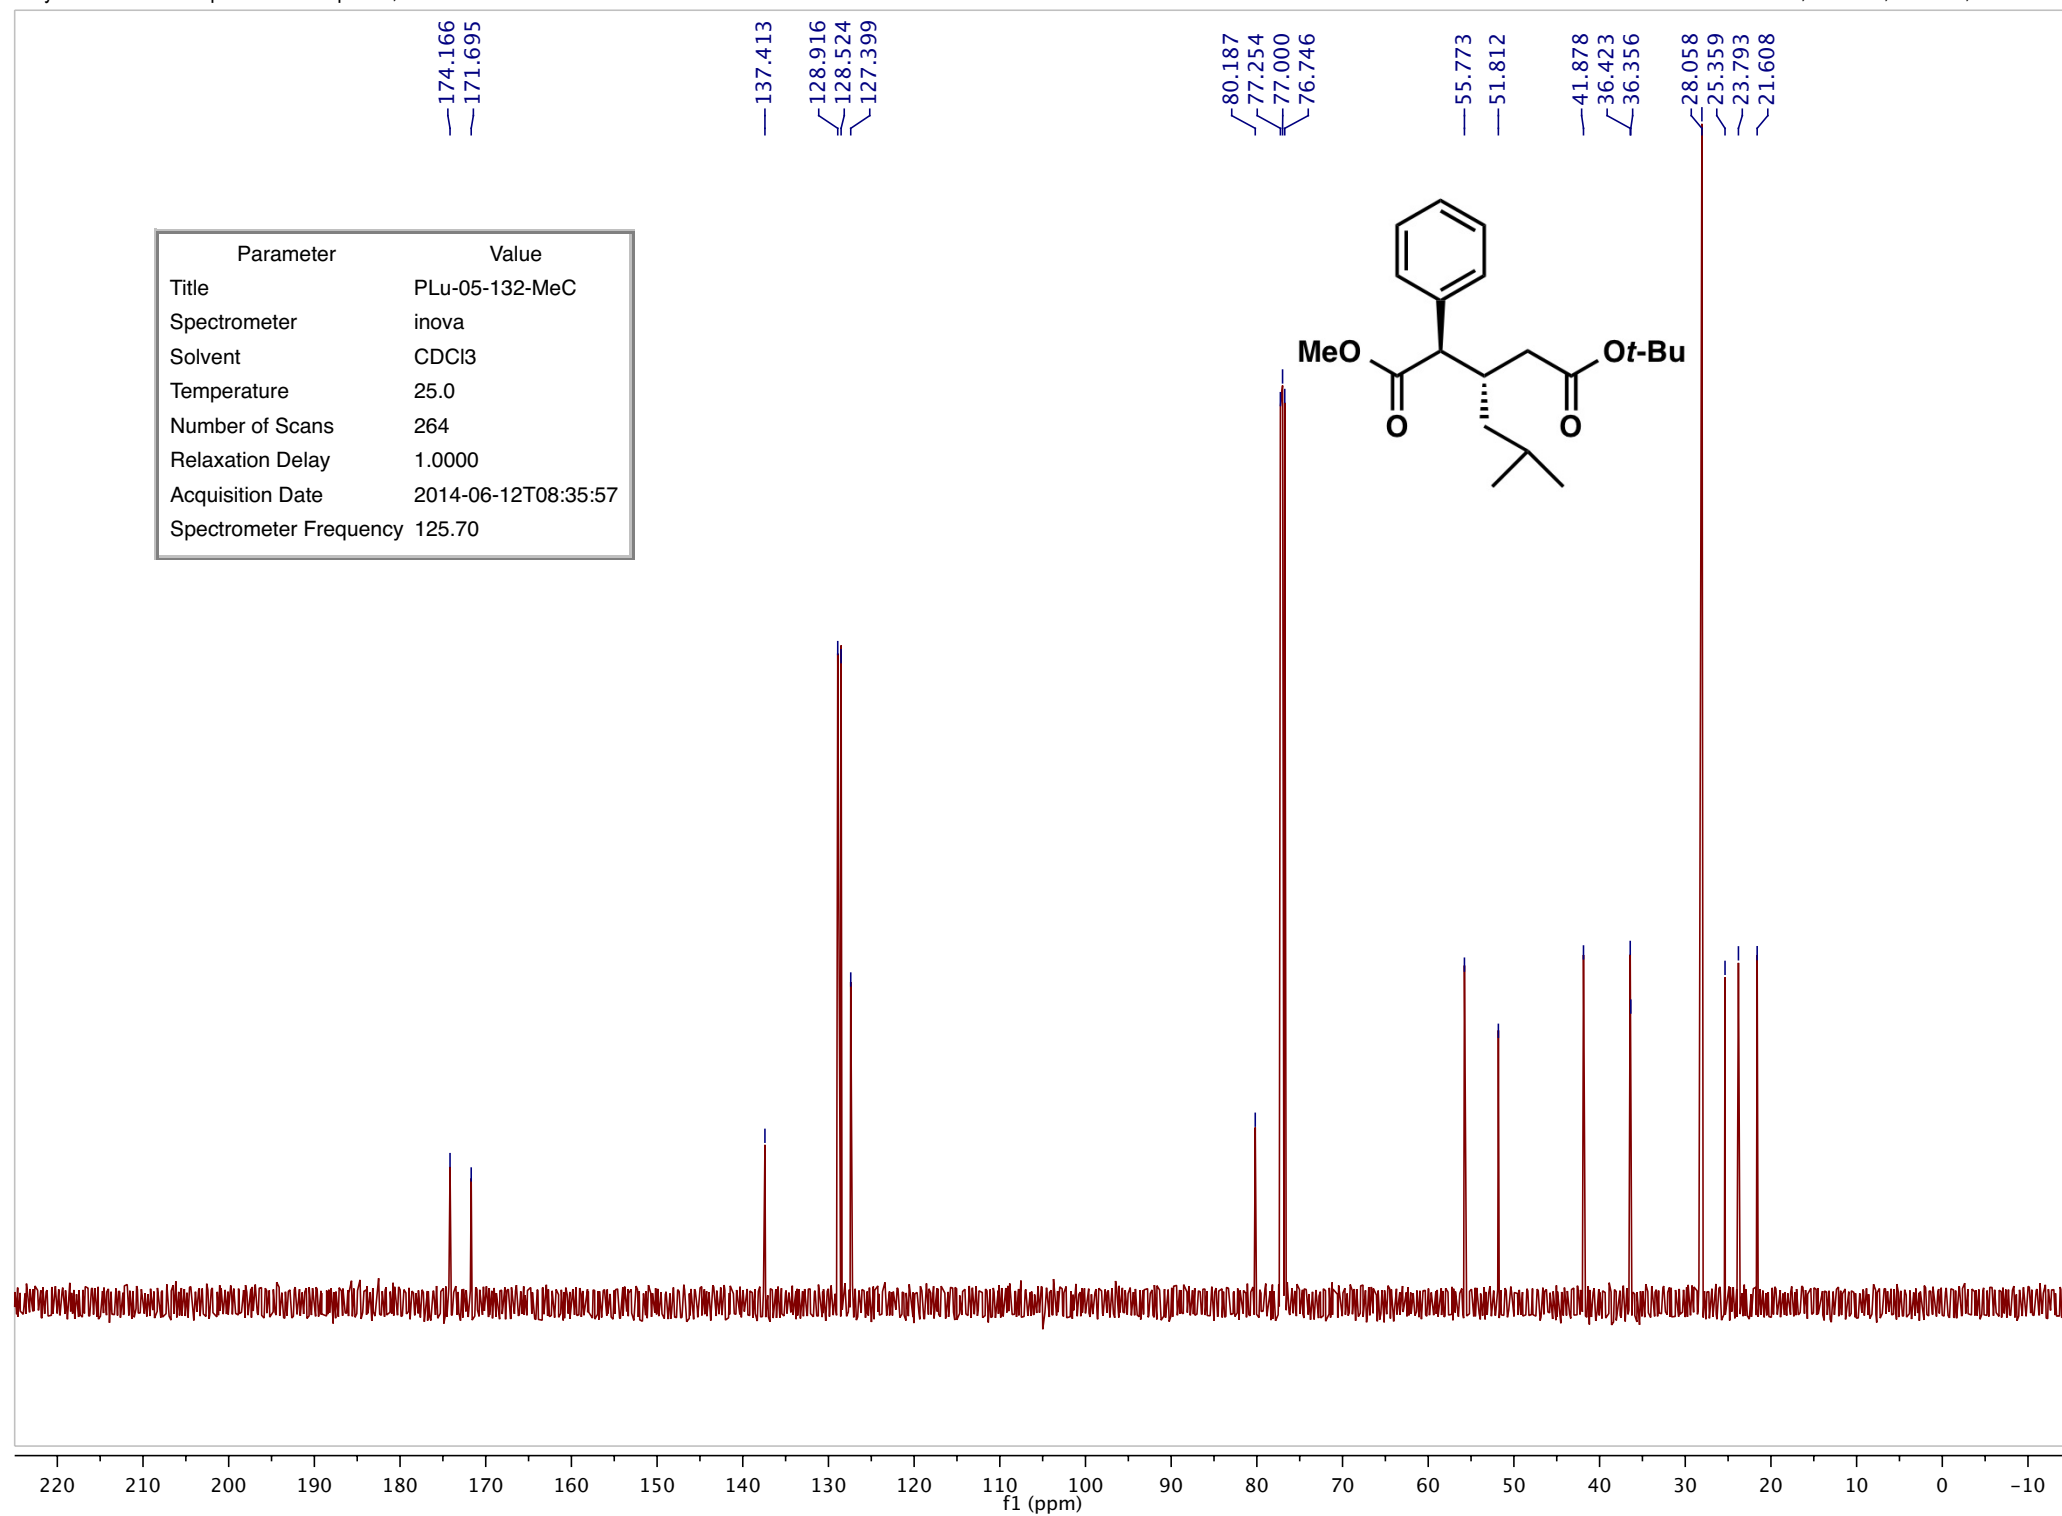

| Parameter              | Value               |
|------------------------|---------------------|
| Title                  | PLu-05-190-H        |
| Spectrometer           | inova               |
| Solvent                | CDCl <sub>3</sub>   |
| Temperature            | 25.0                |
| Number of Scans        | 8                   |
| Relaxation Delay       | 8.0000              |
| Acquisition Date       | 2014-07-30T09:15:51 |
| Spectrometer Frequency | 499.86              |

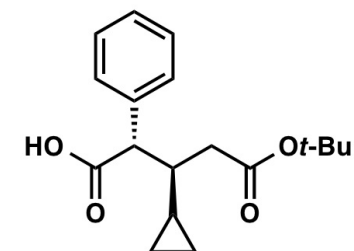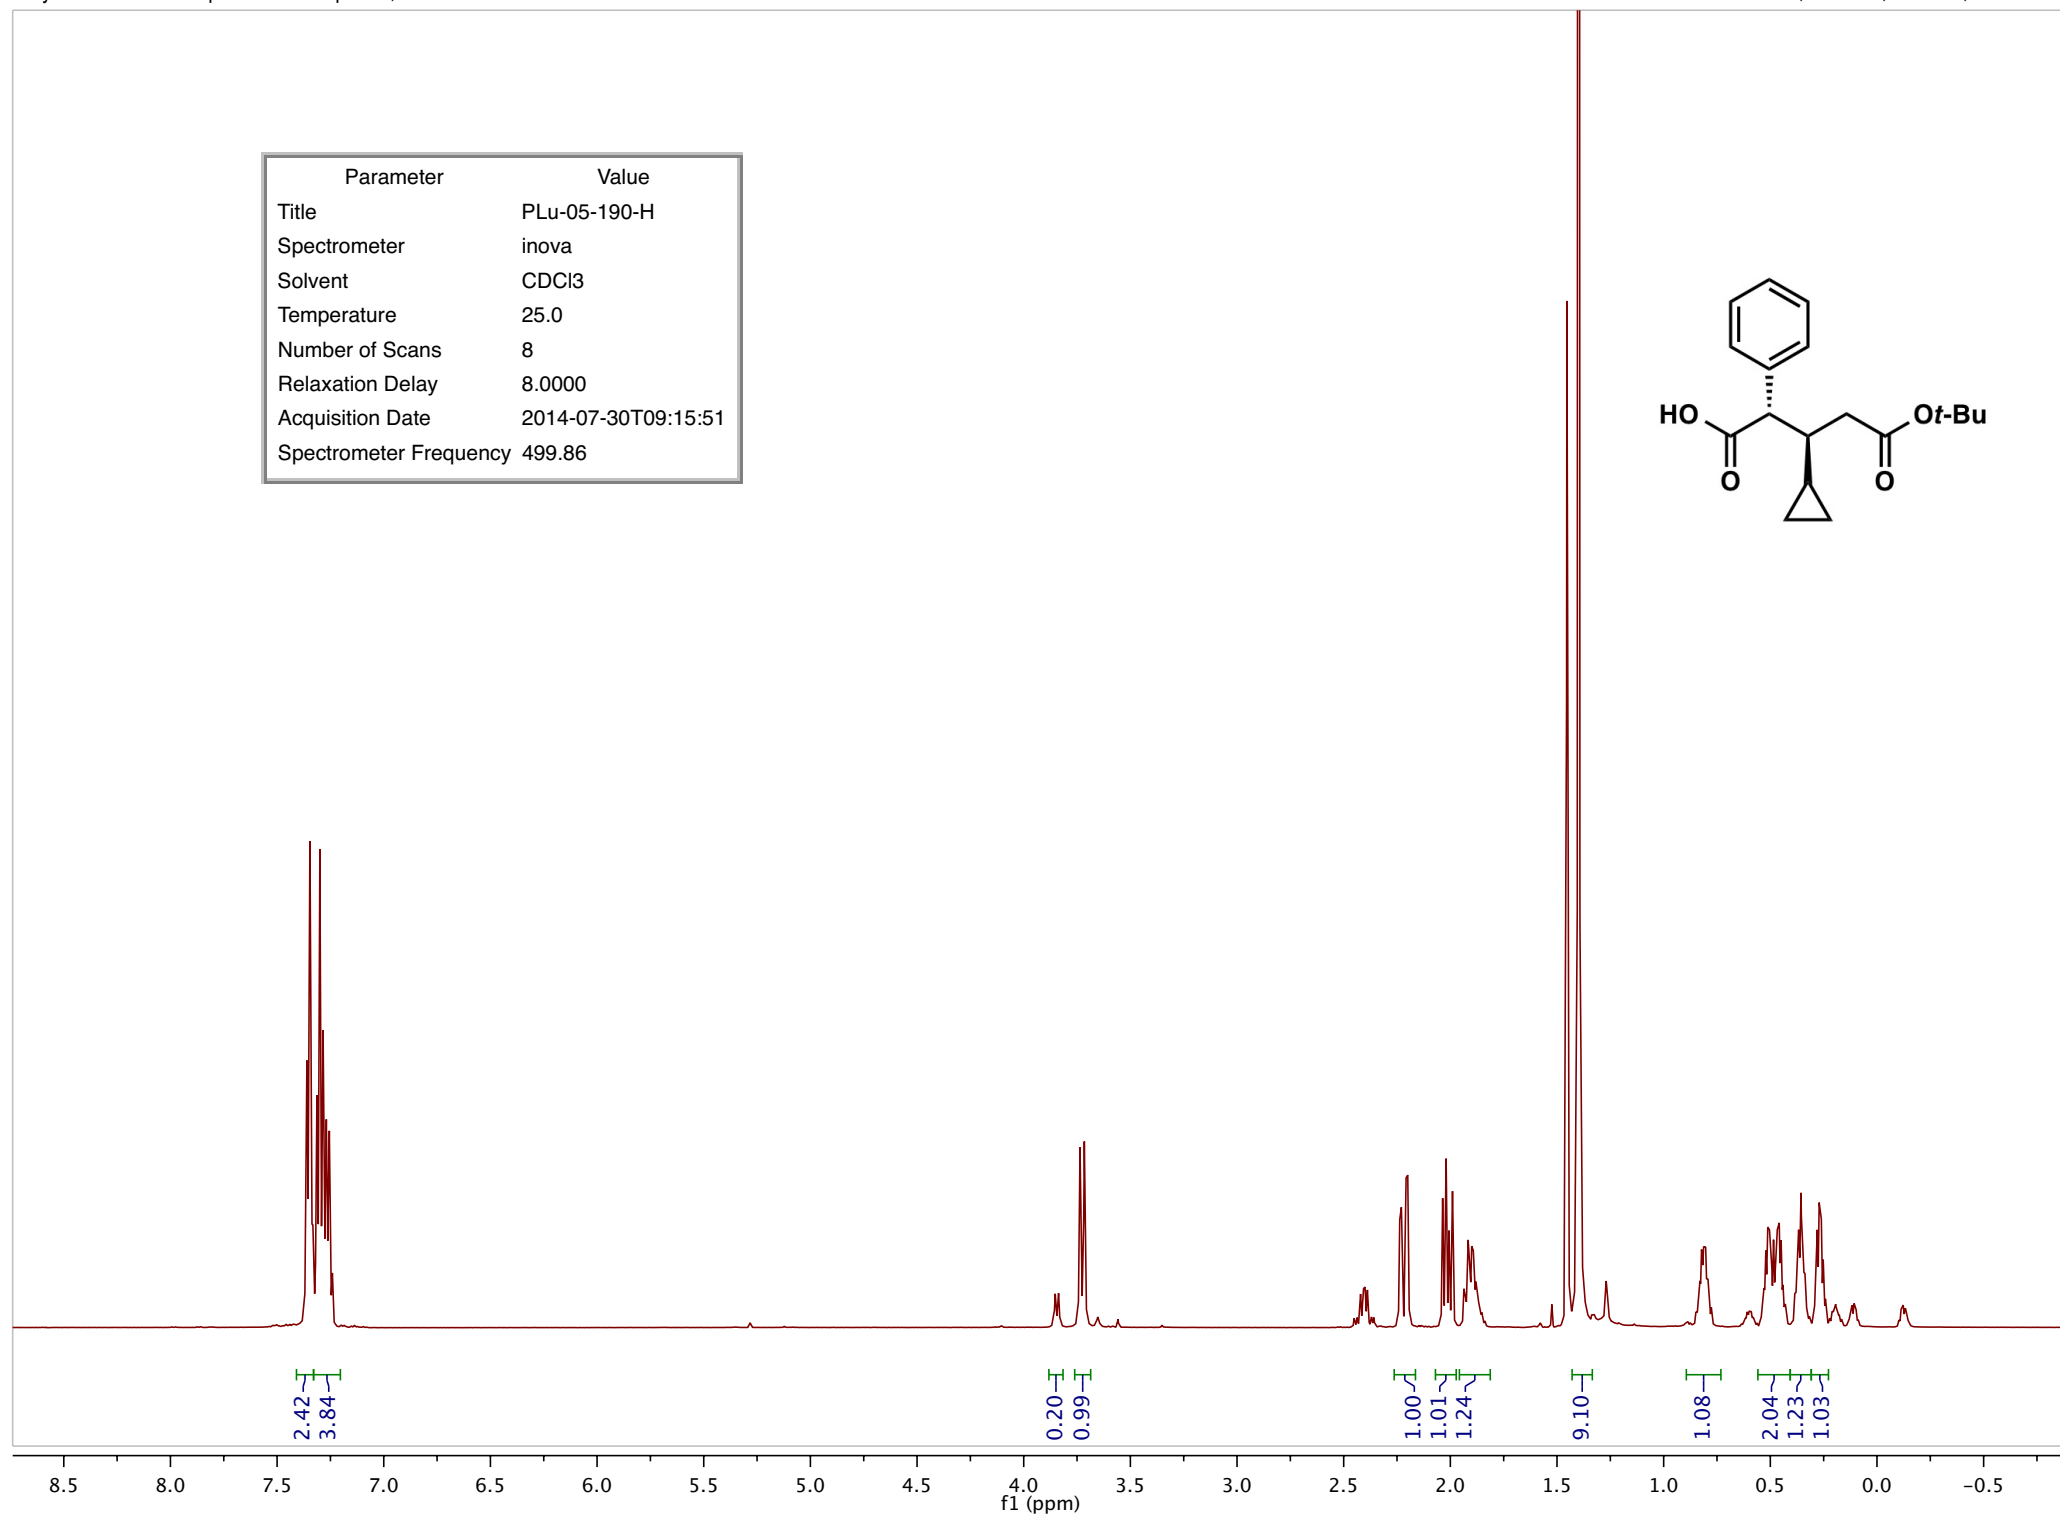

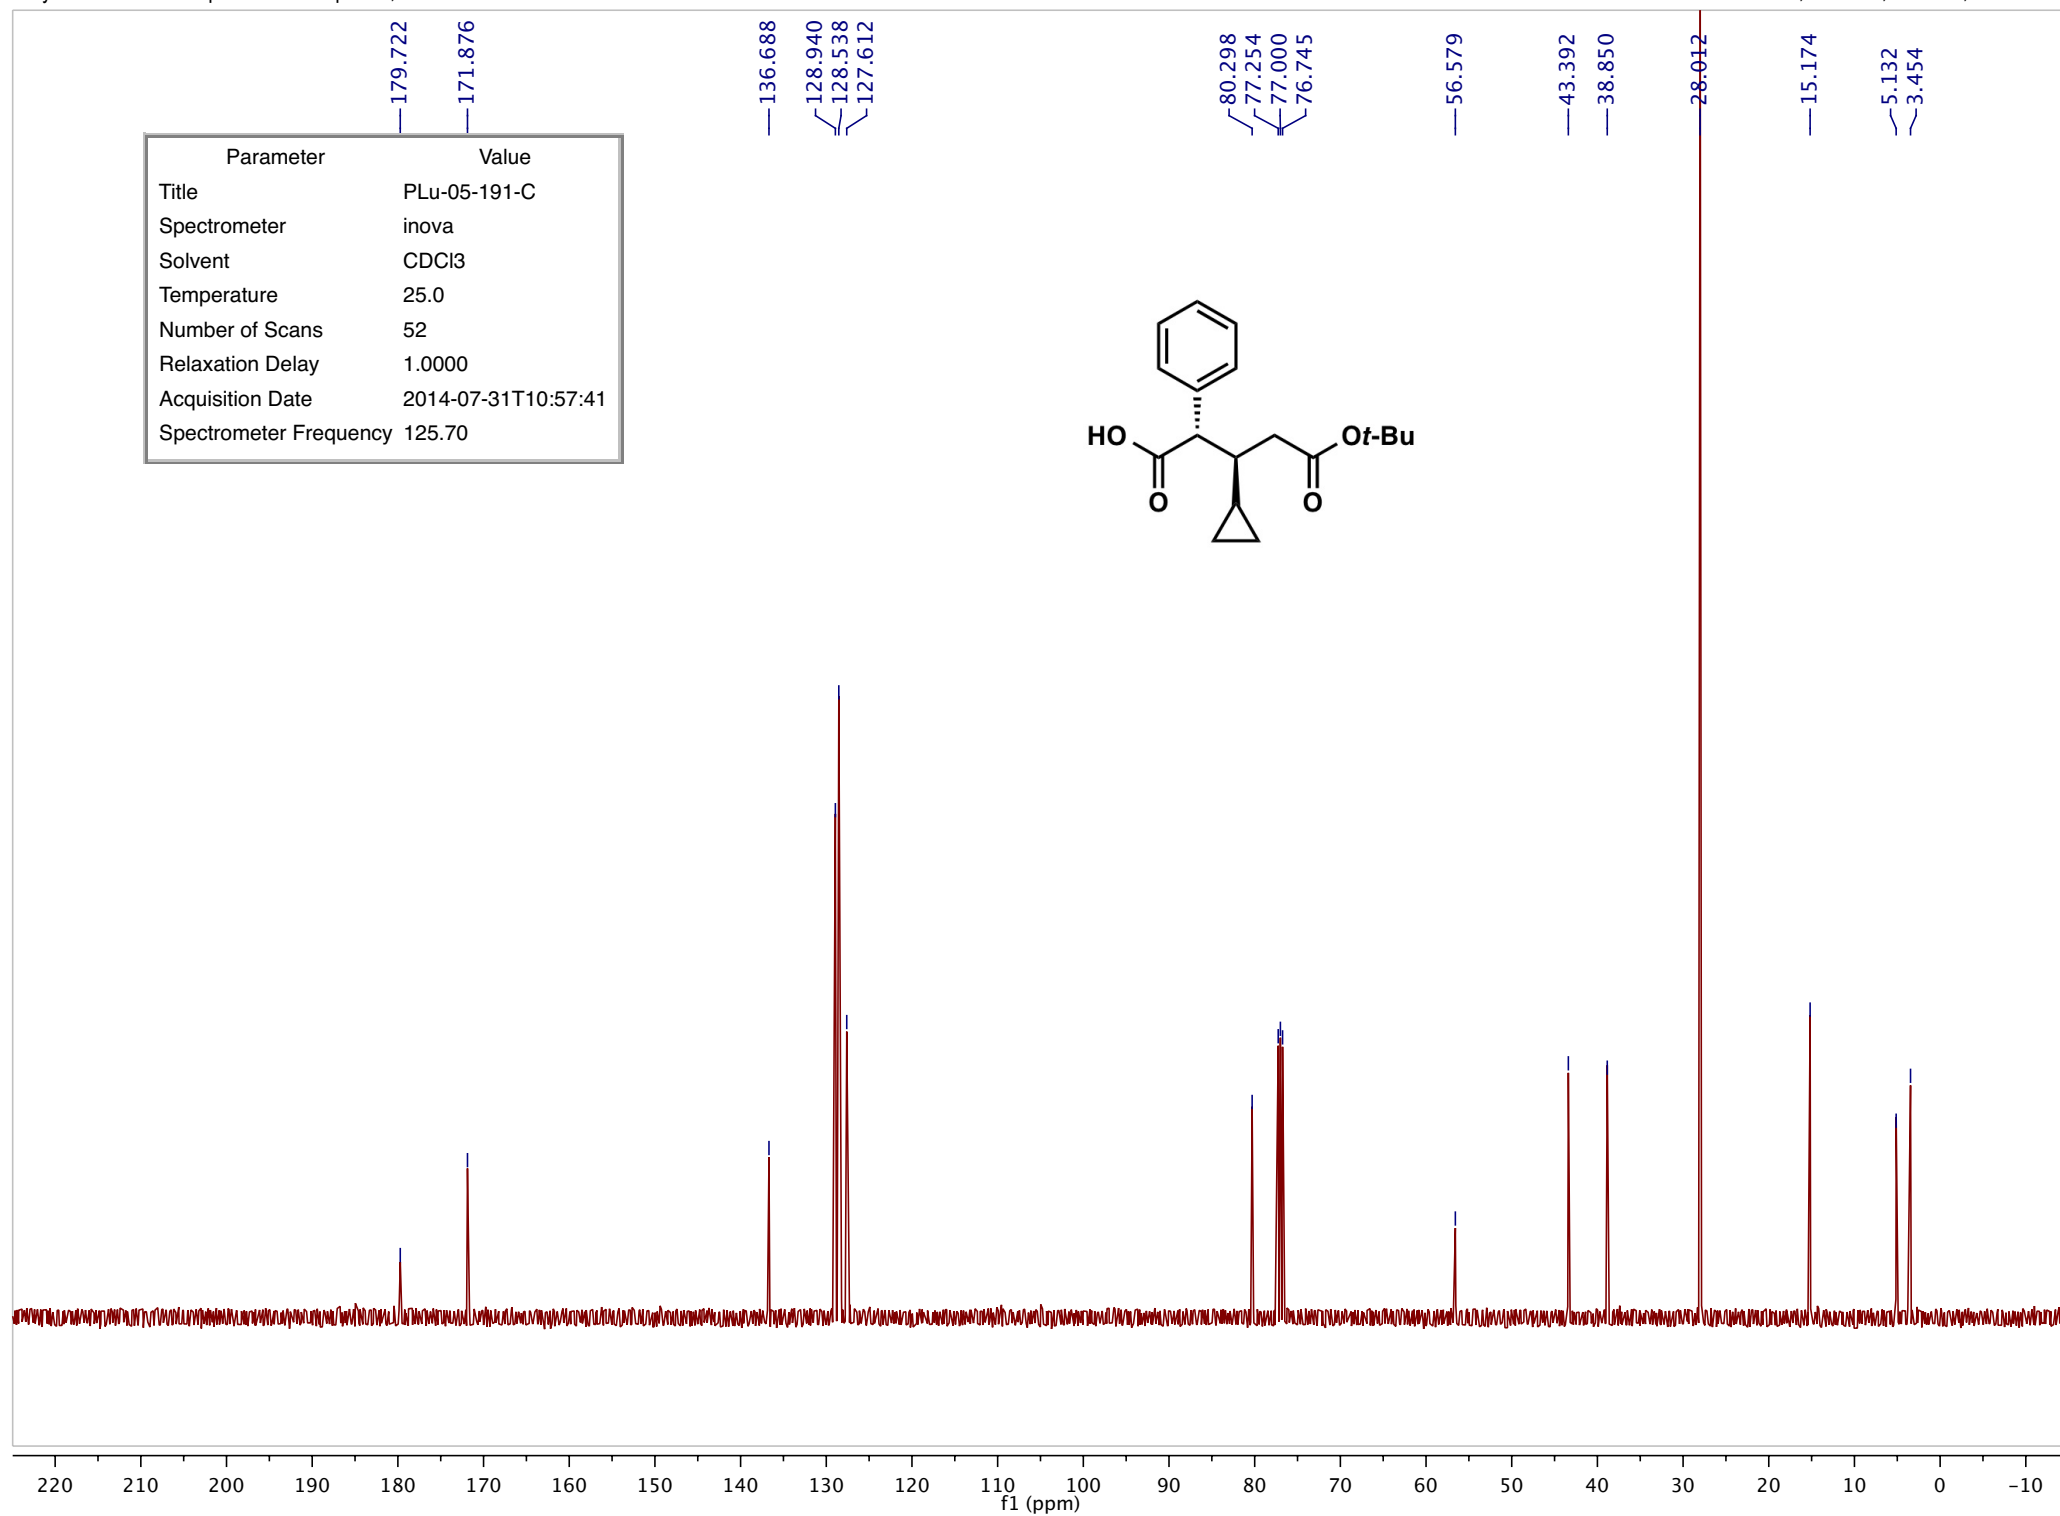

| Parameter              | Value               |
|------------------------|---------------------|
| Title                  | PLu-05-201-HH       |
| Spectrometer           | inova               |
| Solvent                | CDCl3               |
| Temperature            | 30.0                |
| Number of Scans        | 16                  |
| Relaxation Delay       | 8.0000              |
| Acquisition Date       | 2014-08-08T18:57:57 |
| Spectrometer Frequency | 499.86              |

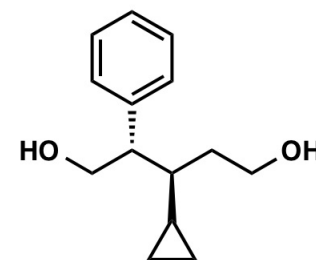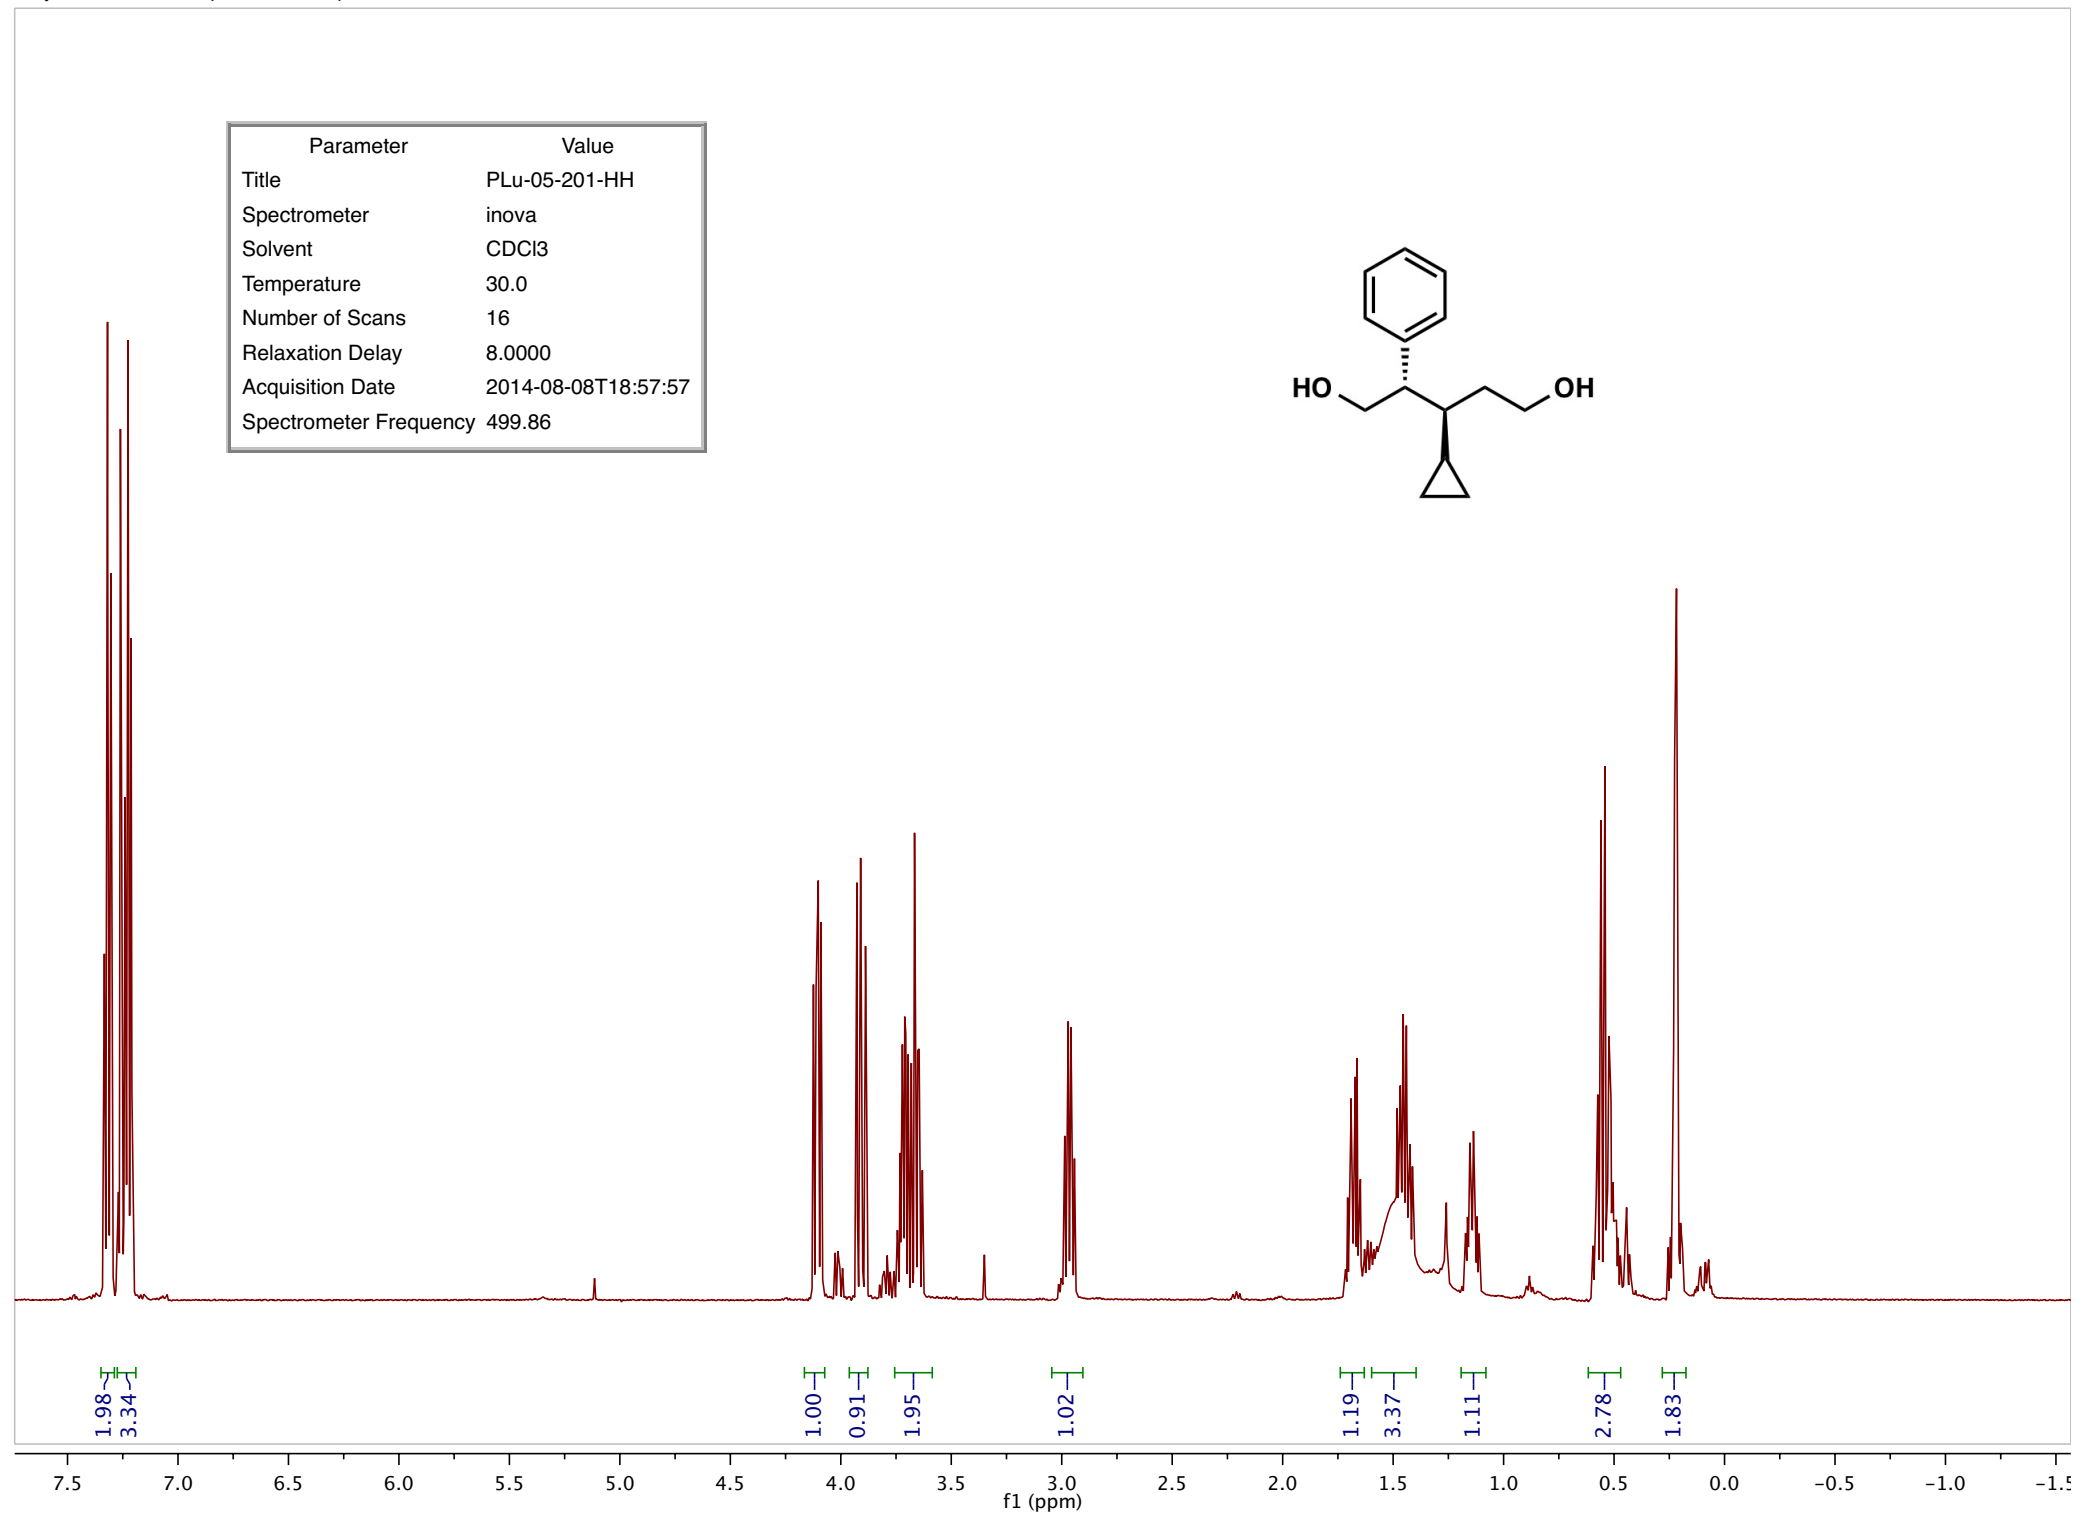

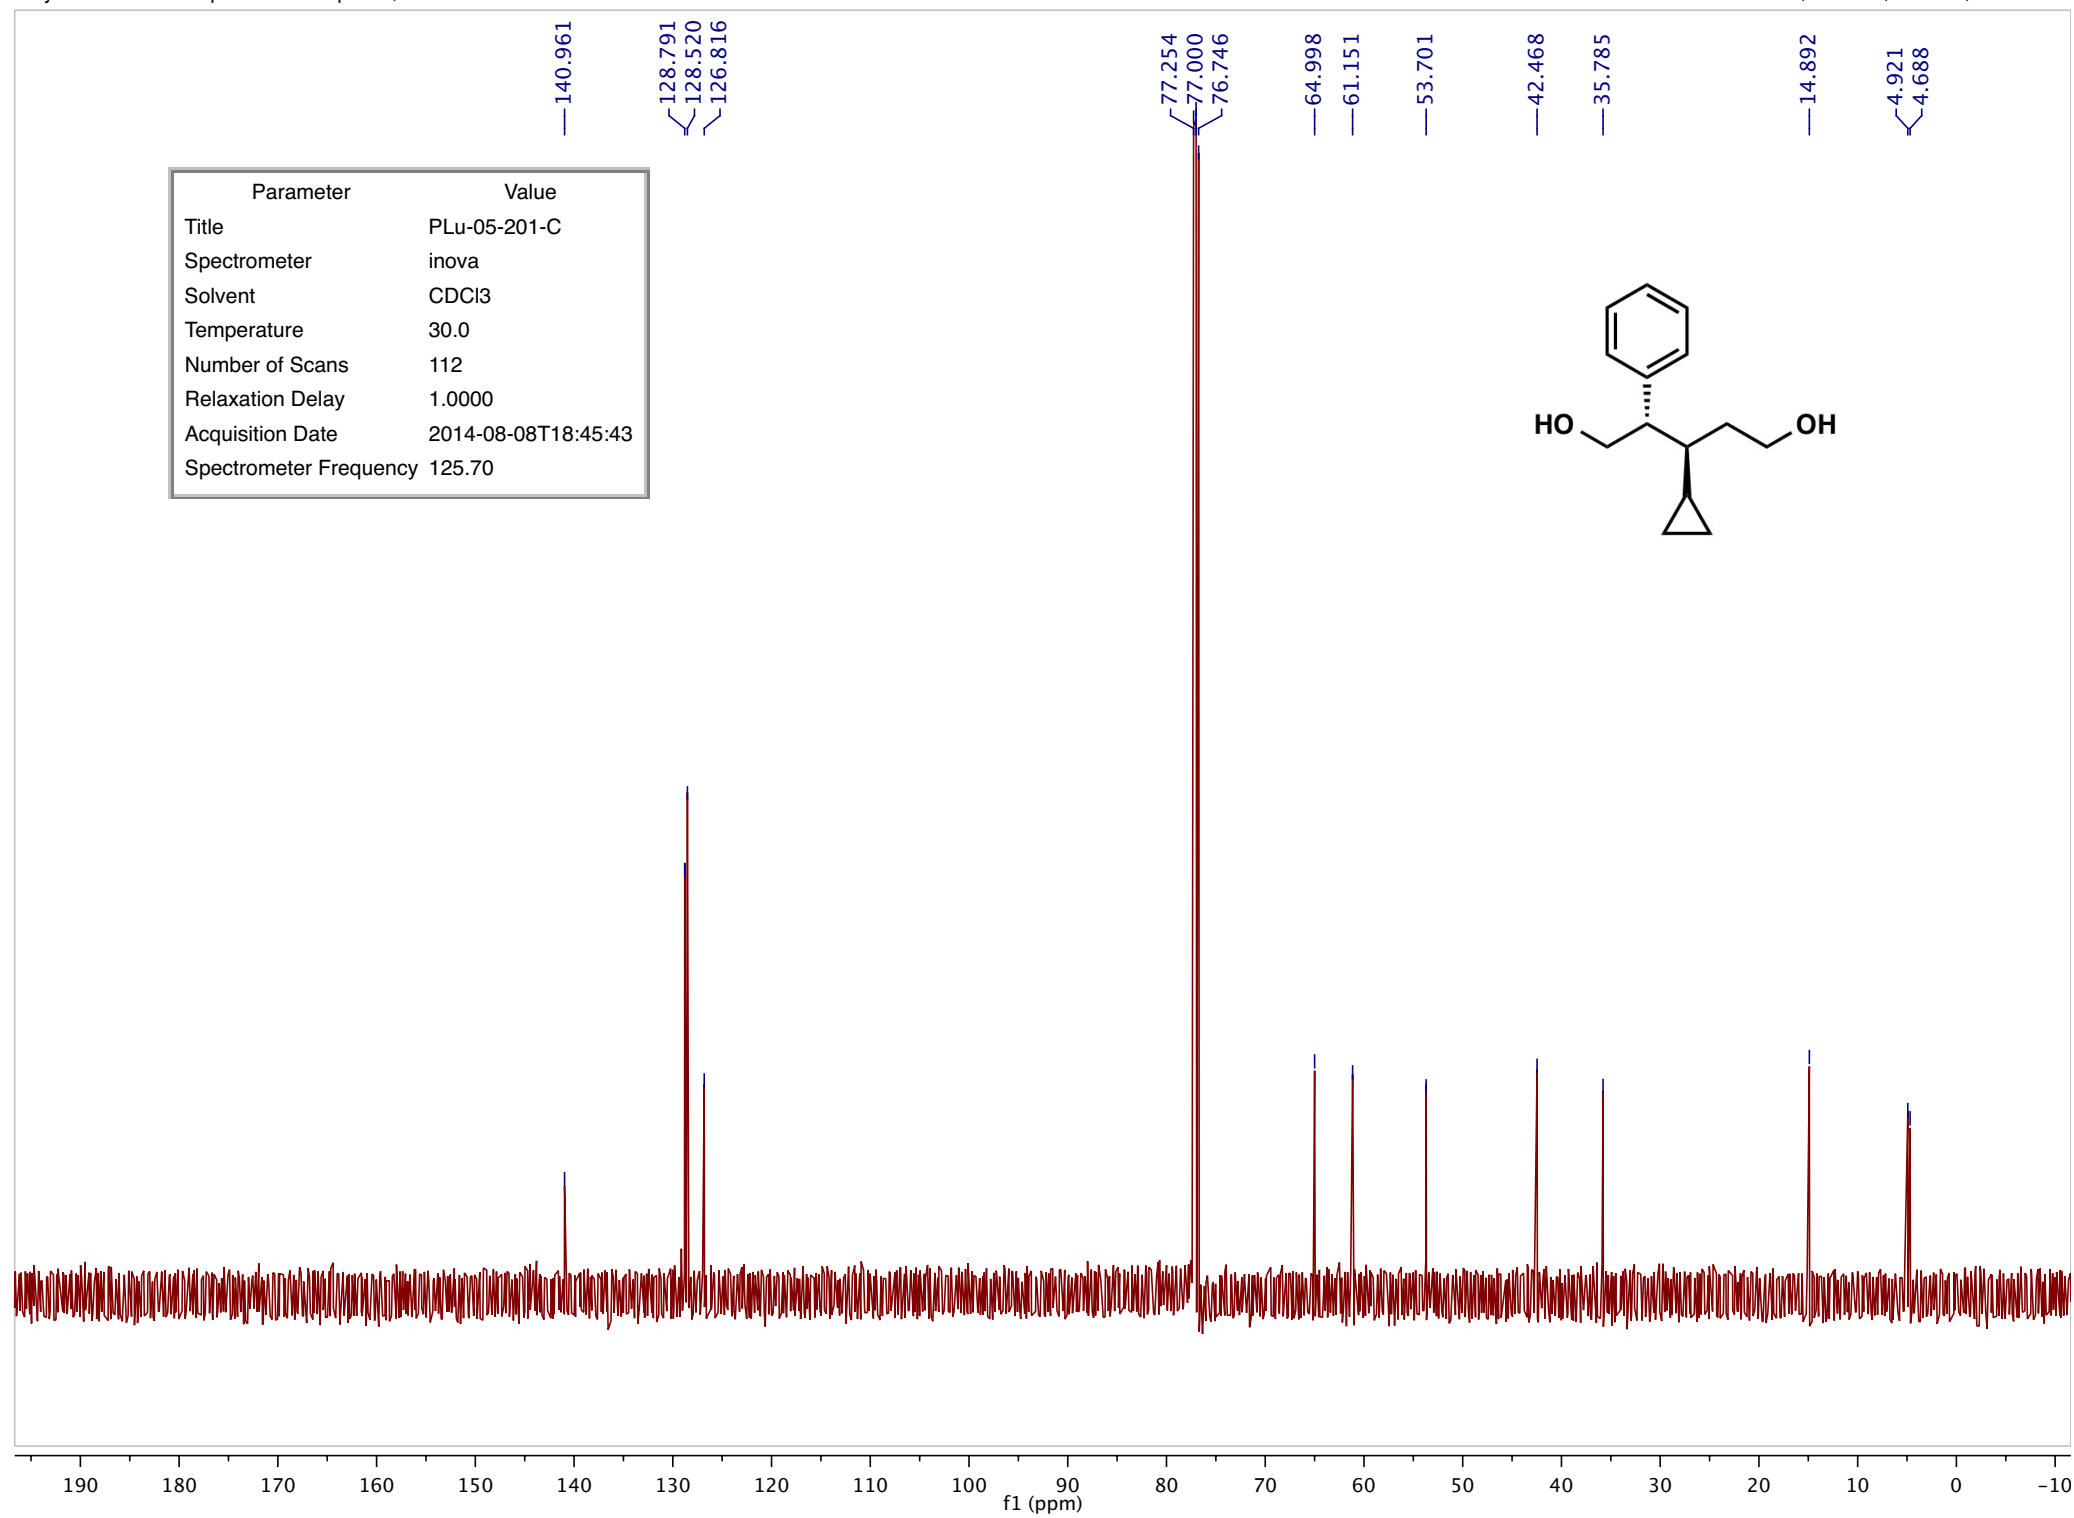

| Parameter              | Value               |
|------------------------|---------------------|
| Title                  | PLu-05-218-HH       |
| Spectrometer           | inova               |
| Solvent                | CDCl <sub>3</sub>   |
| Temperature            | 25.0                |
| Number of Scans        | 8                   |
| Relaxation Delay       | 8.0000              |
| Acquisition Date       | 2014-09-06T18:11:51 |
| Spectrometer Frequency | 499.86              |

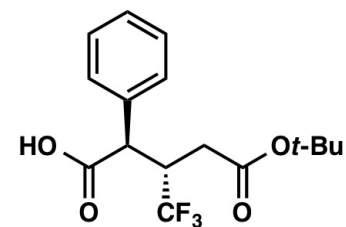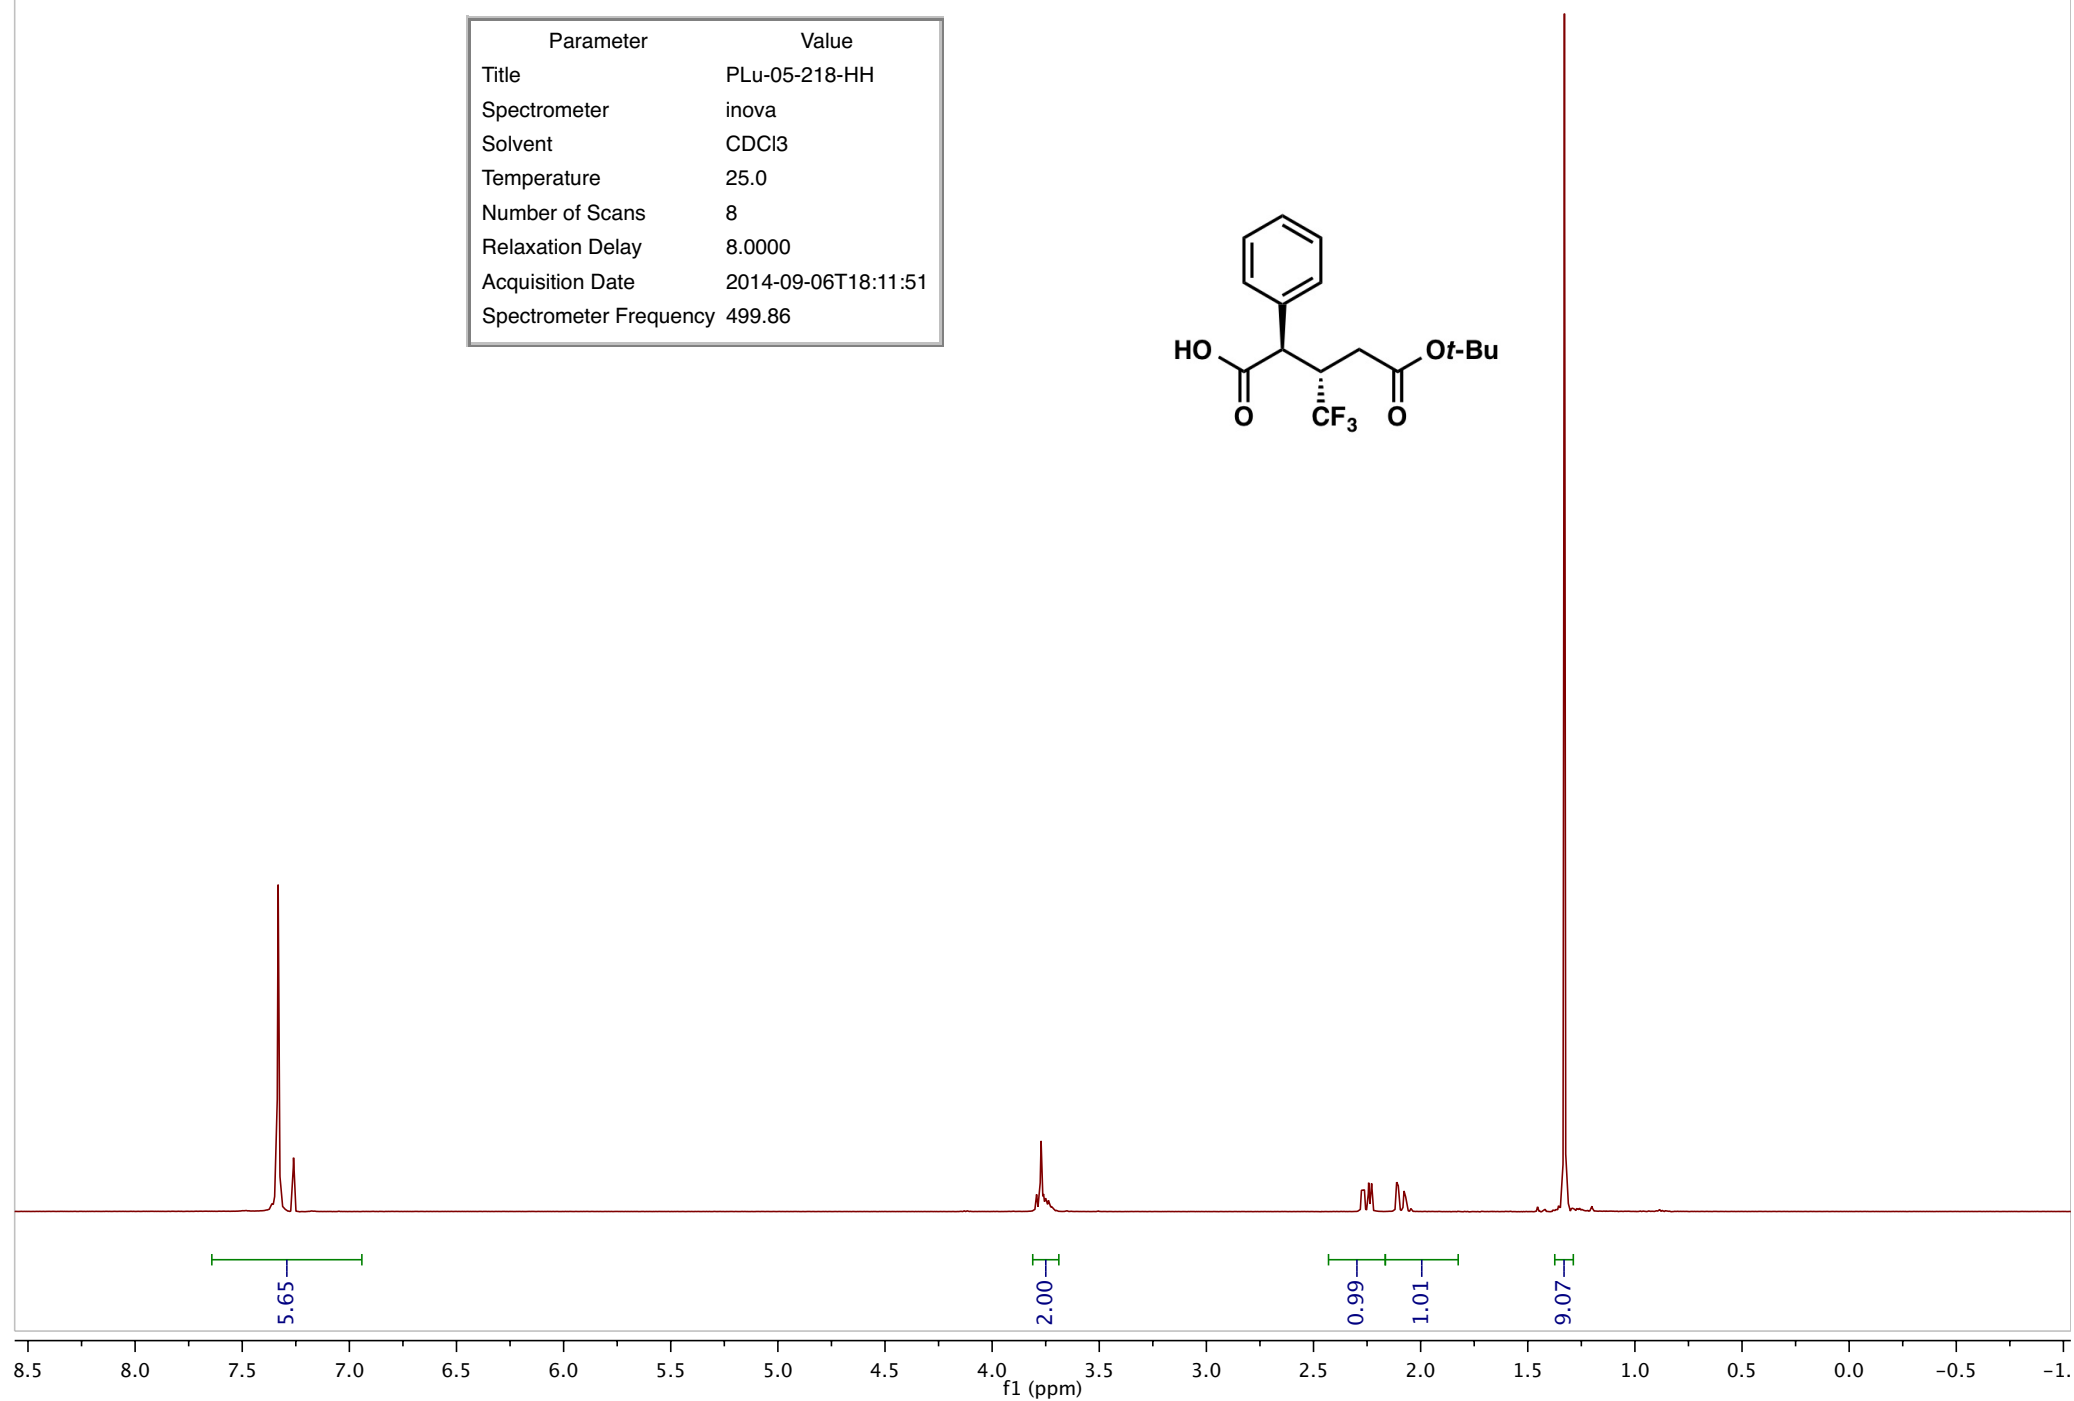



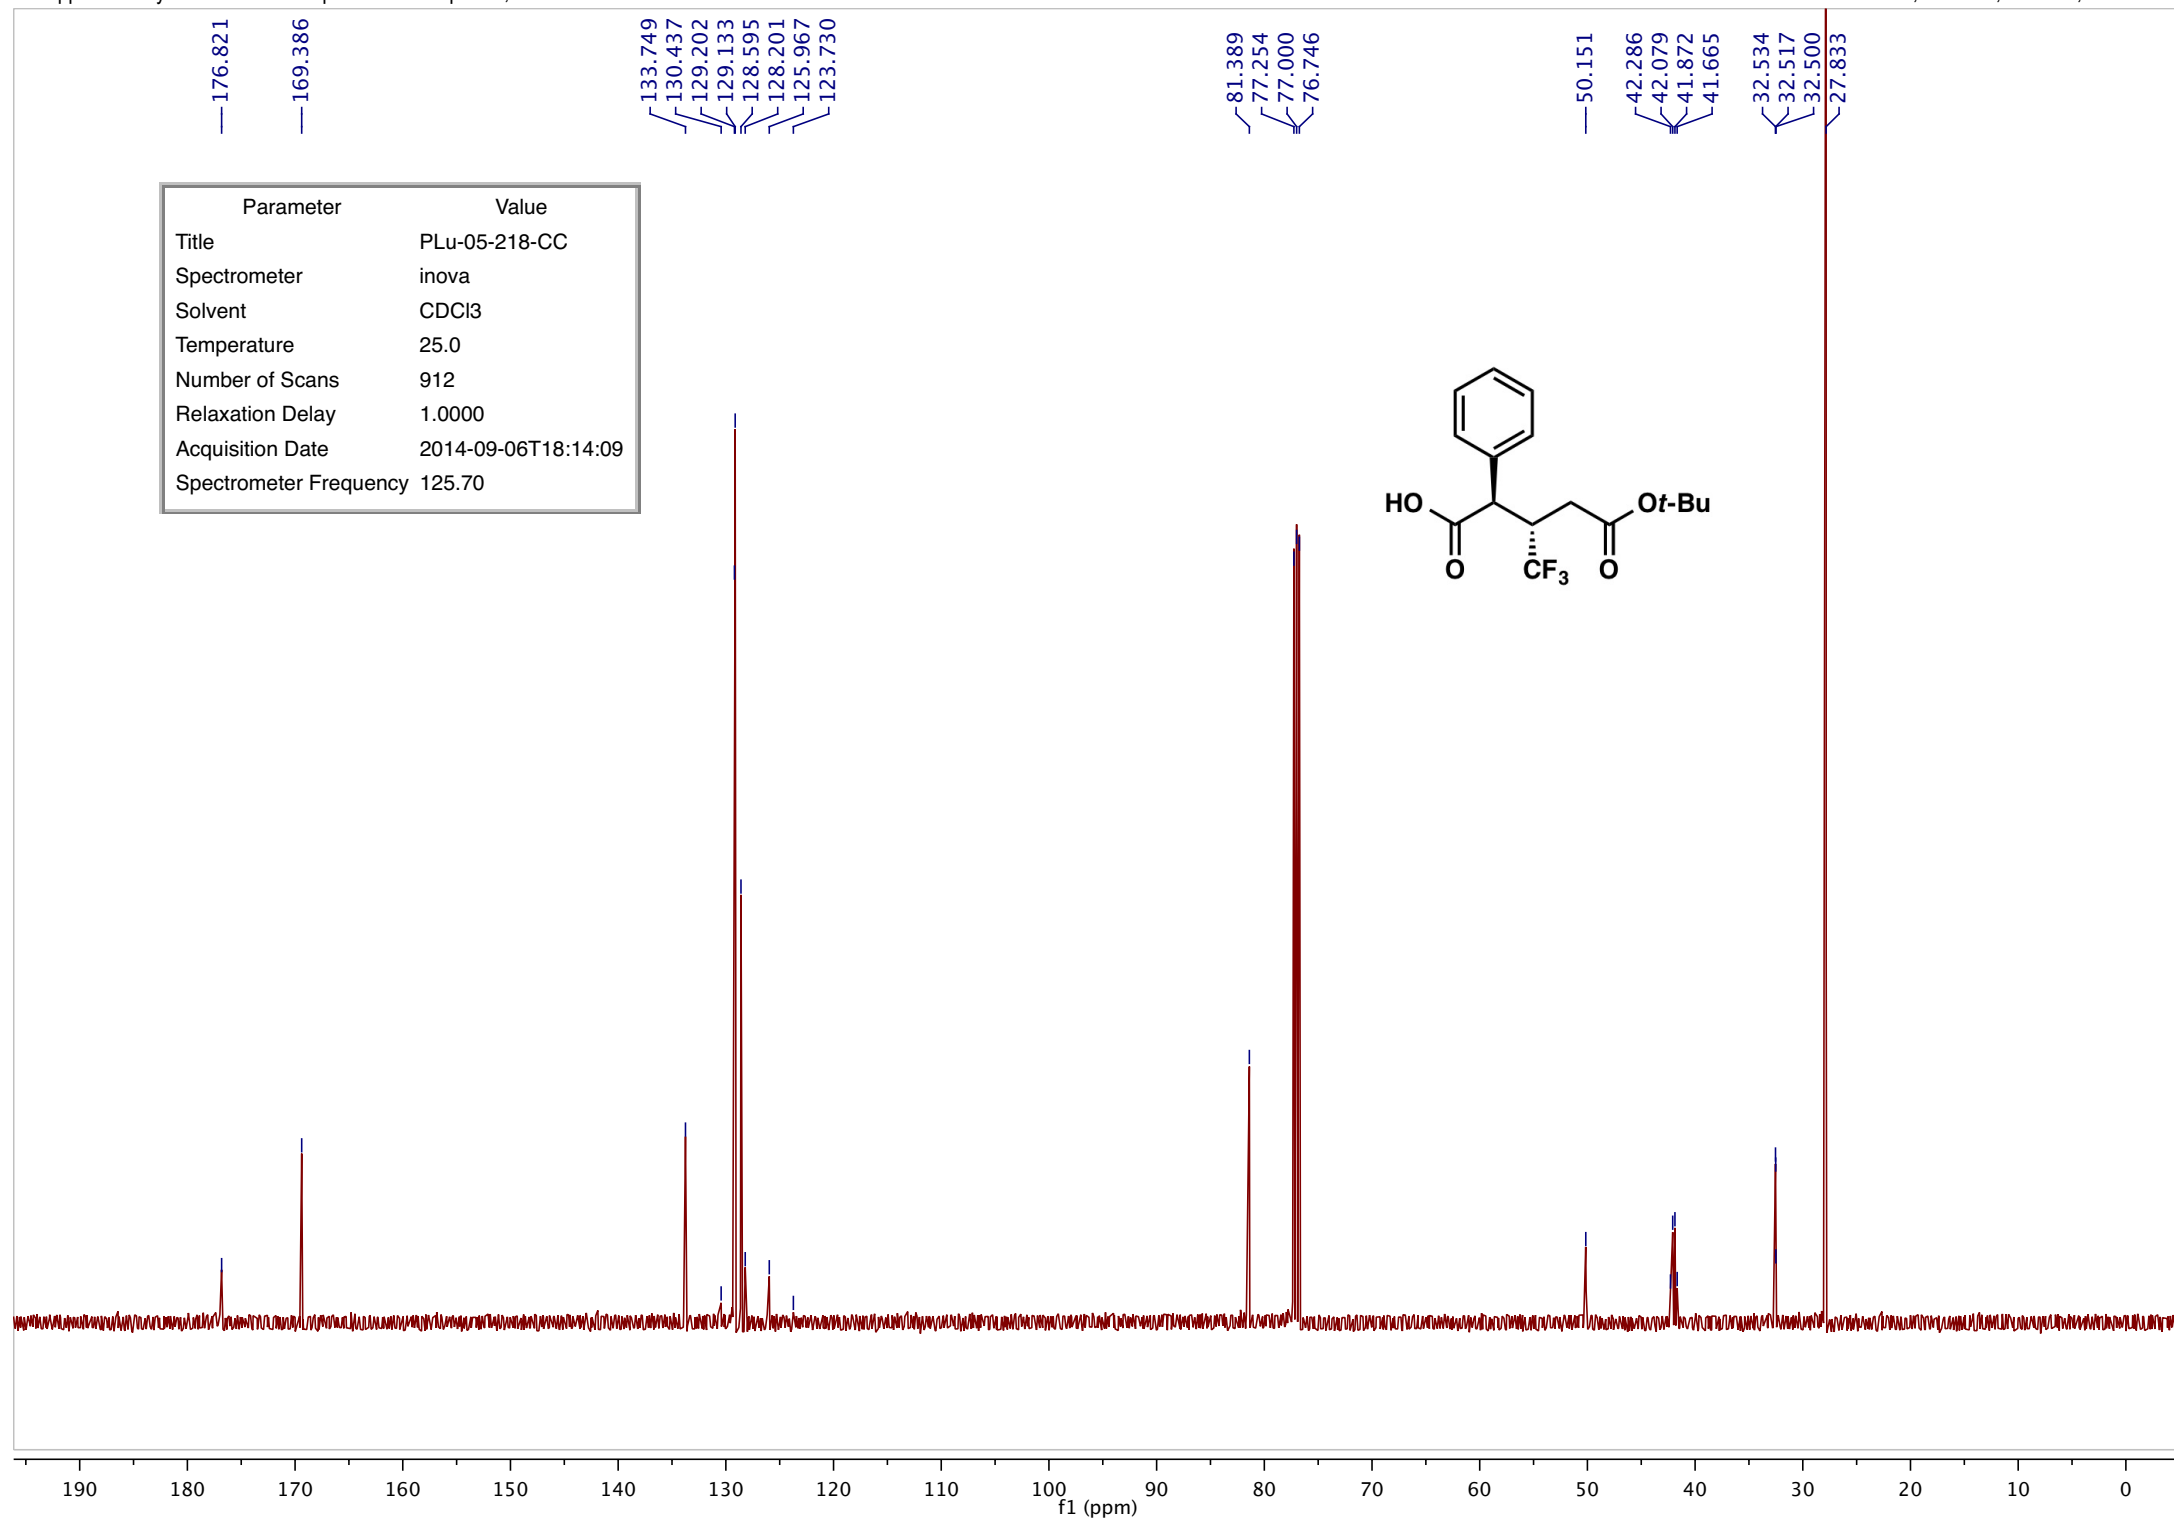

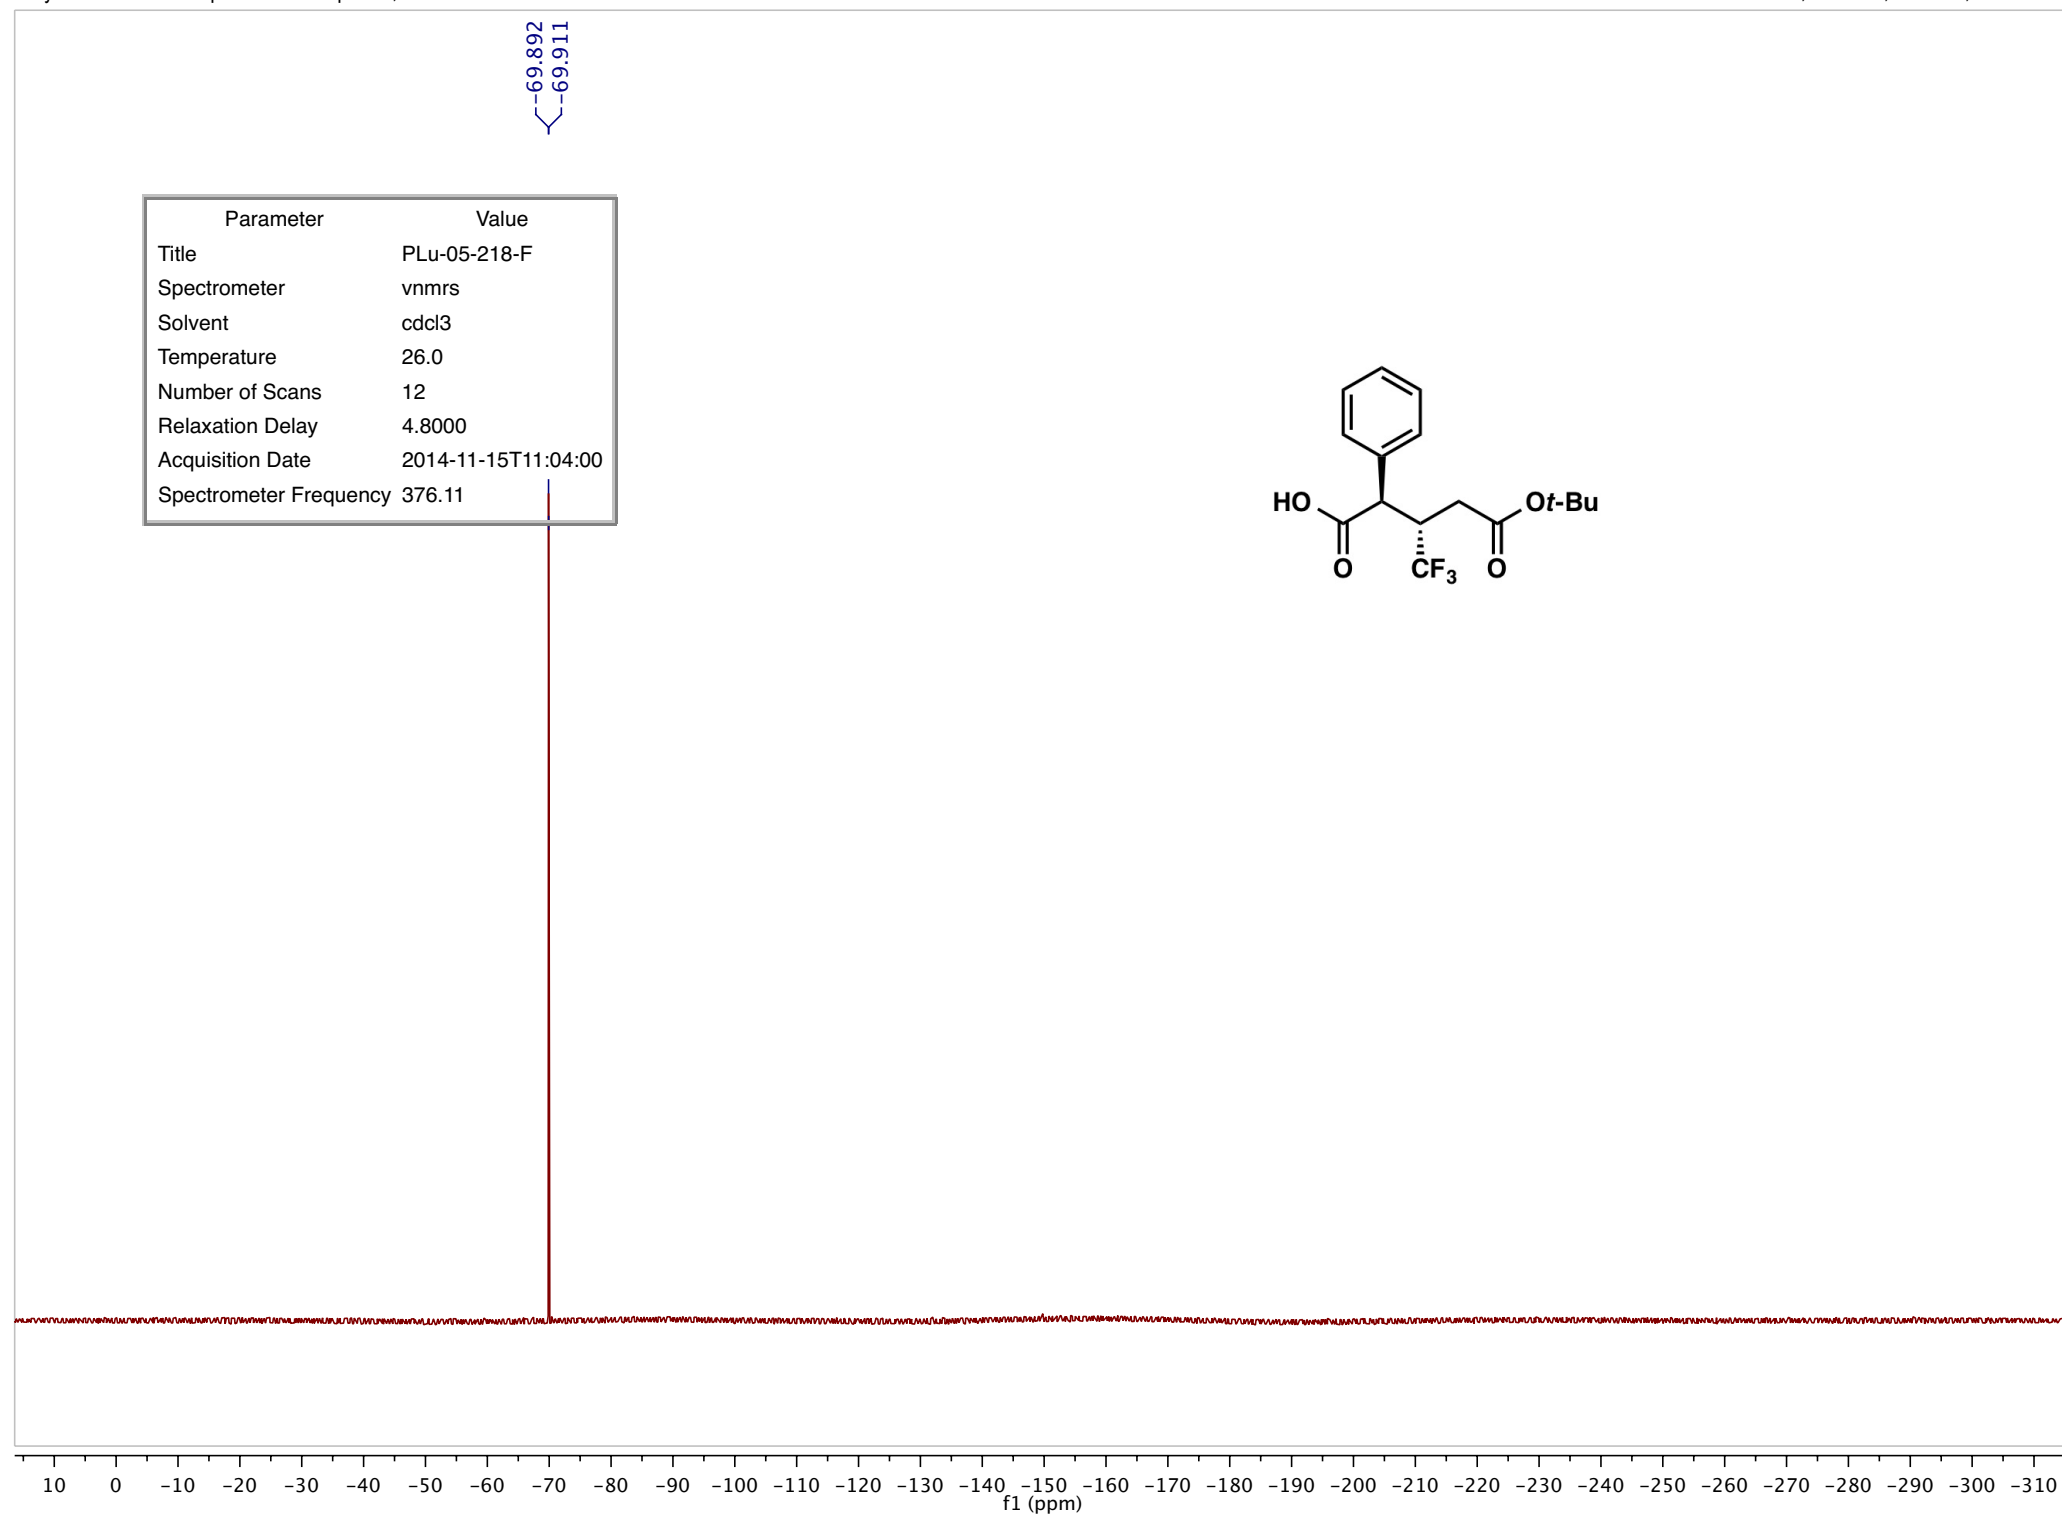

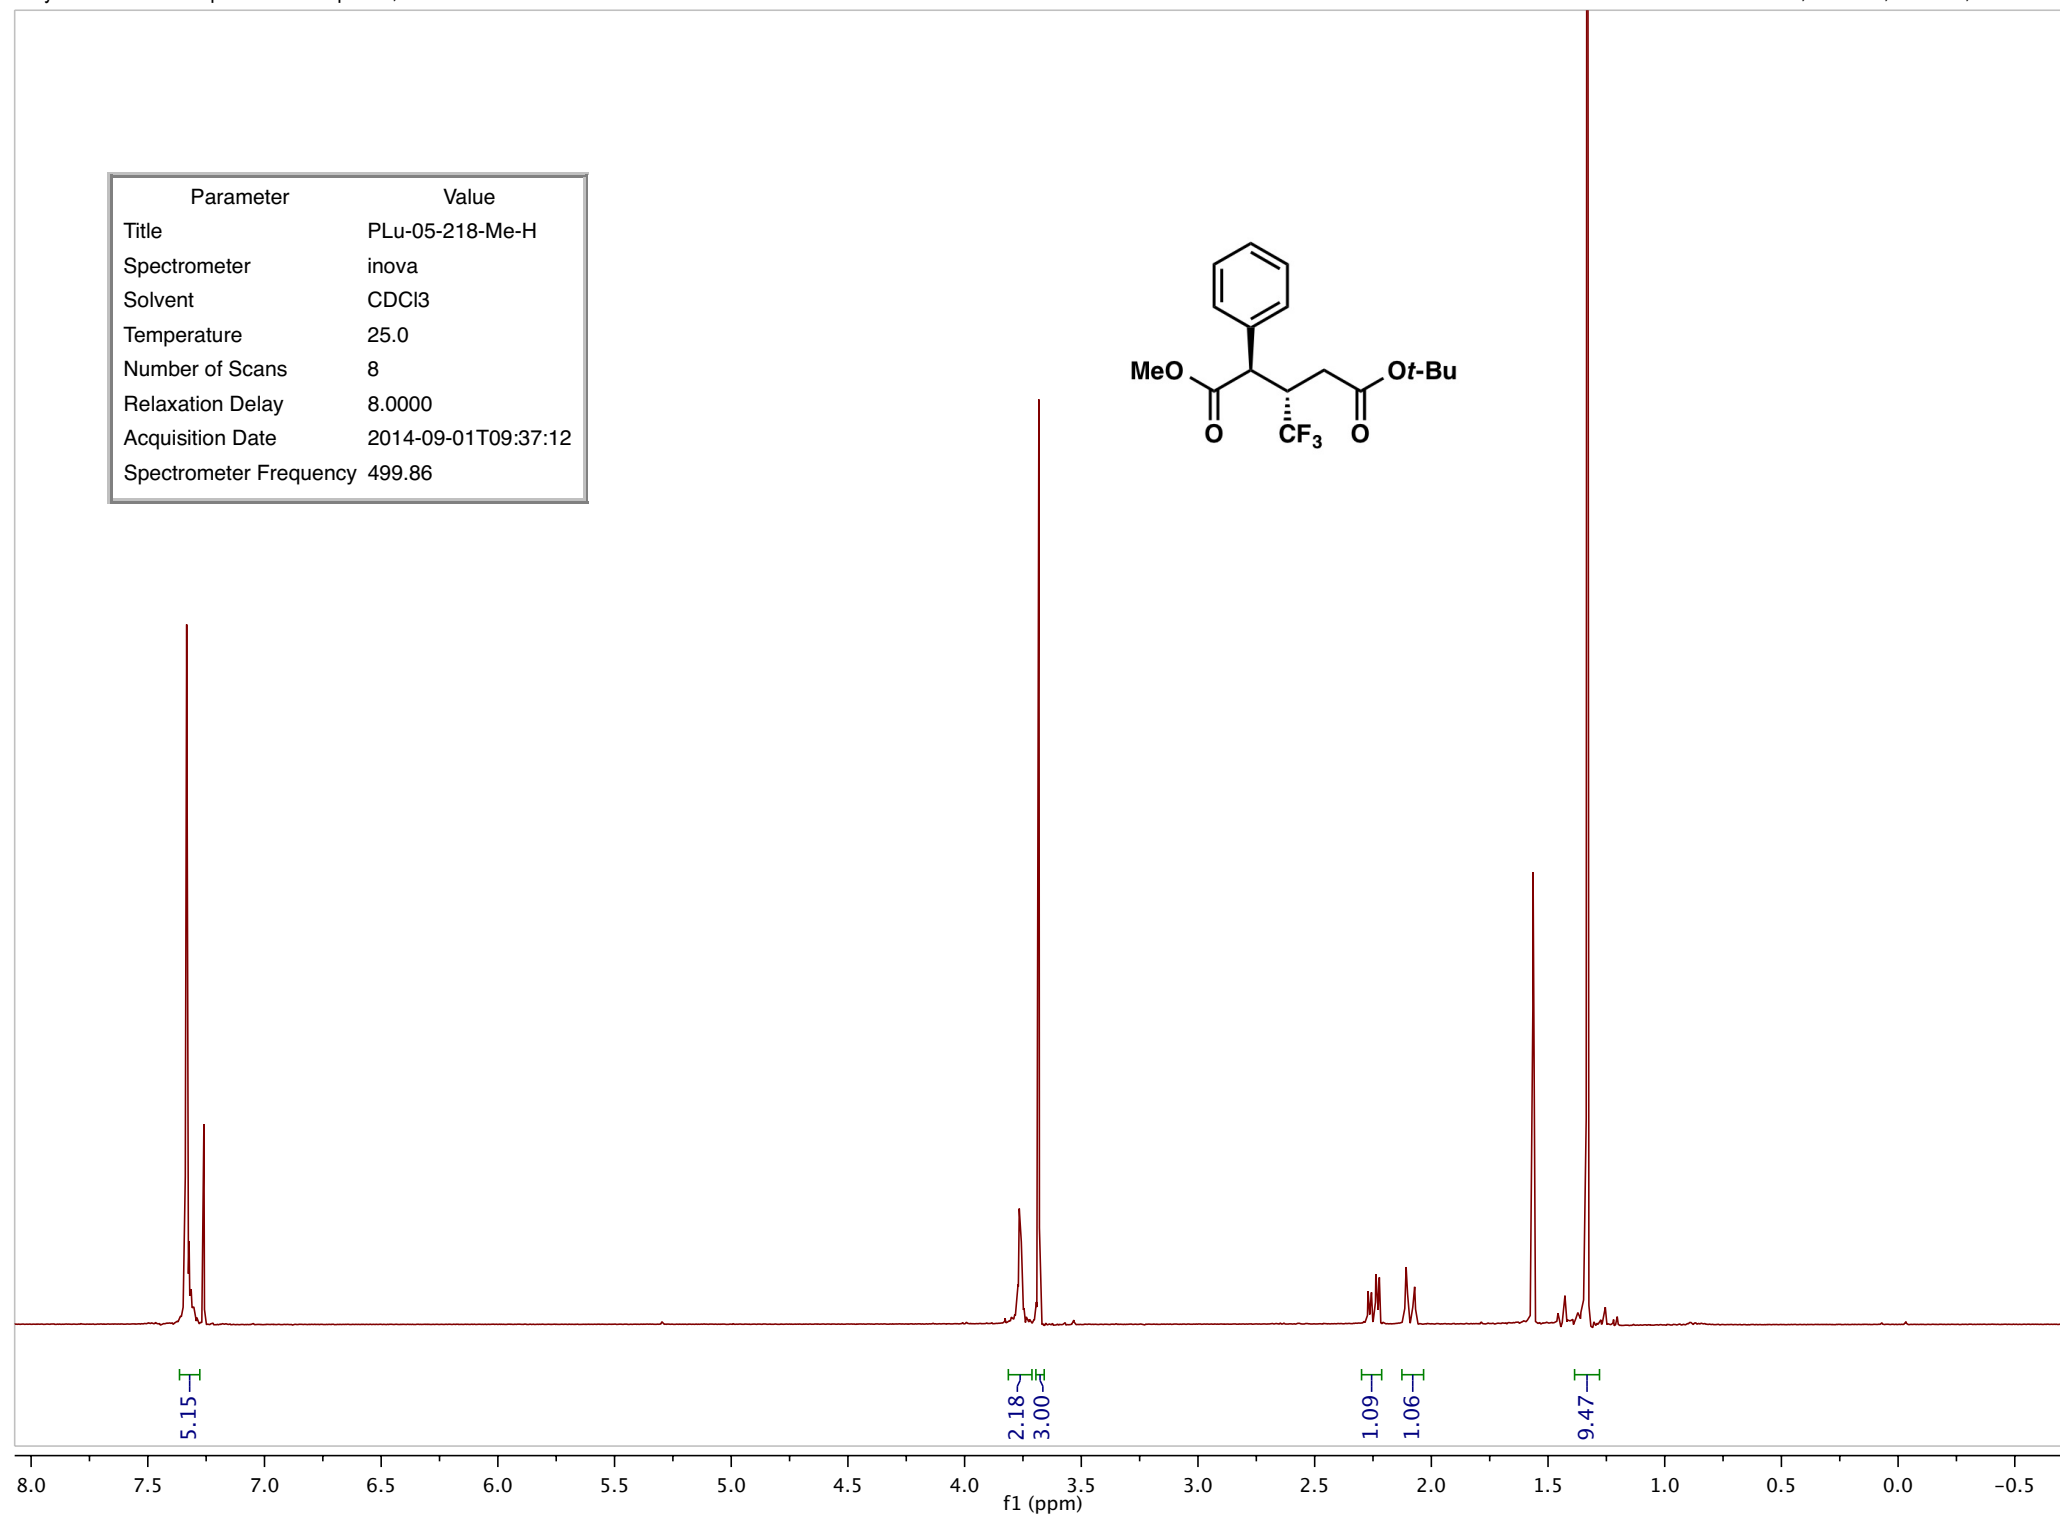

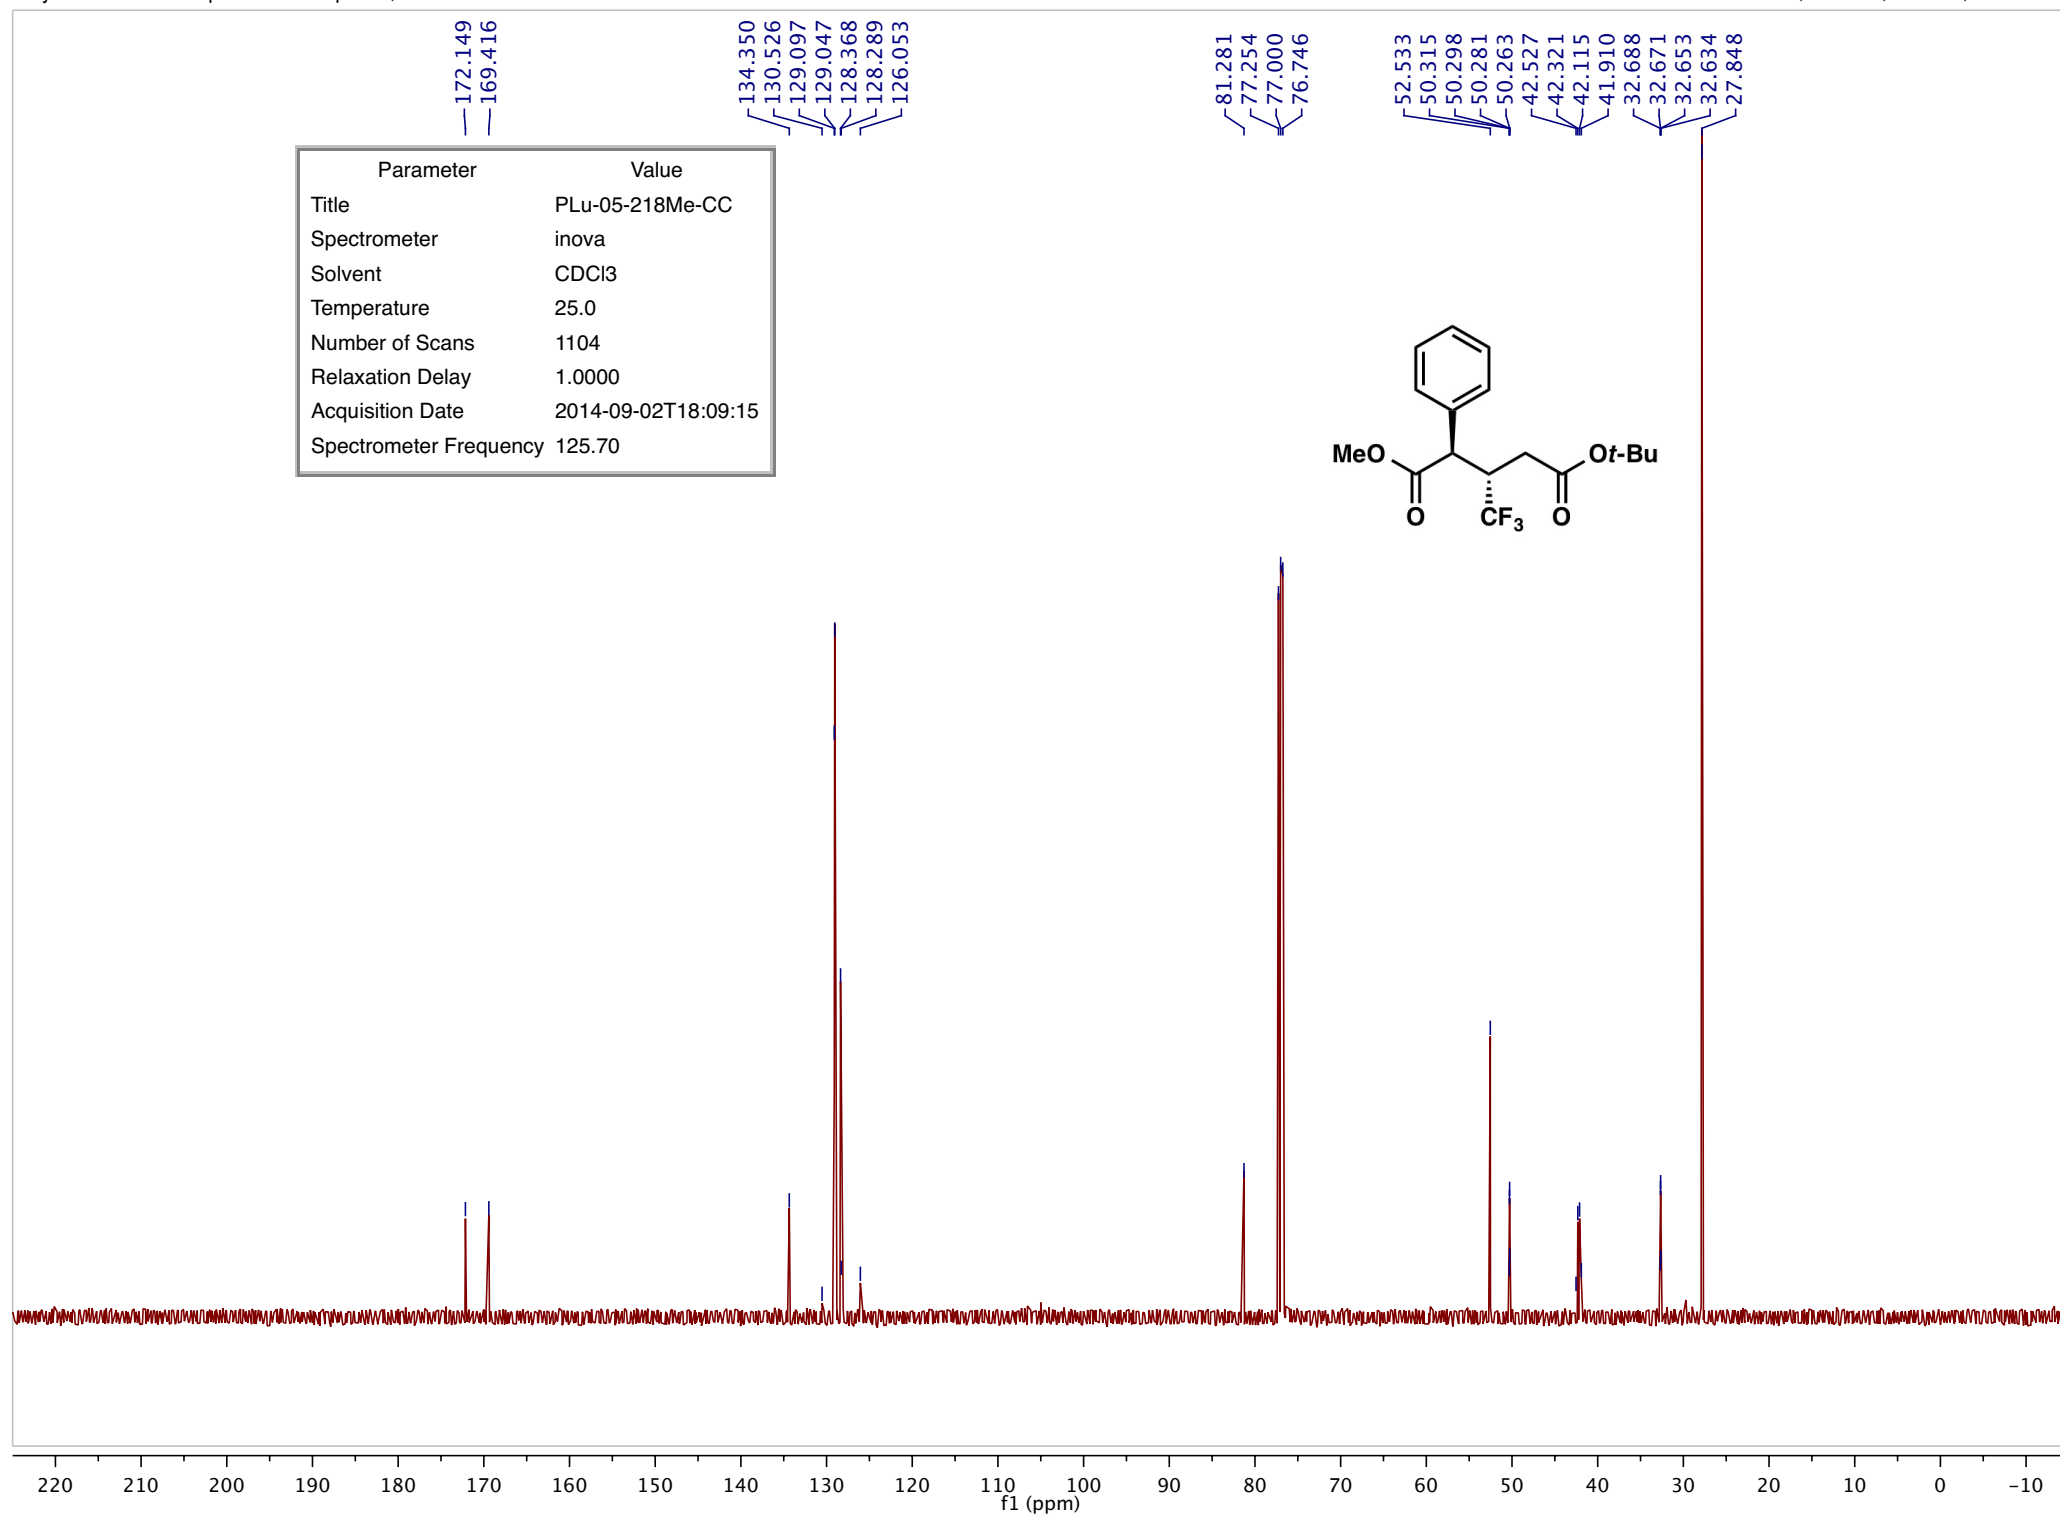

| Parameter              | Value               |
|------------------------|---------------------|
| Title                  | PLu-05-218-Me-F     |
| Spectrometer           | vnmrs               |
| Solvent                | cdcl3               |
| Temperature            | 20.0                |
| Number of Scans        | 16                  |
| Relaxation Delay       | 4.8000              |
| Acquisition Date       | 2014-09-01T10:06:08 |
| Spectrometer Frequency | 376.11              |

70.004  
70.023

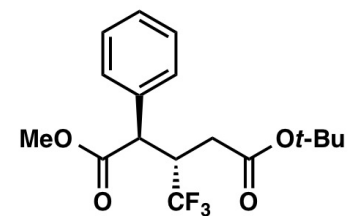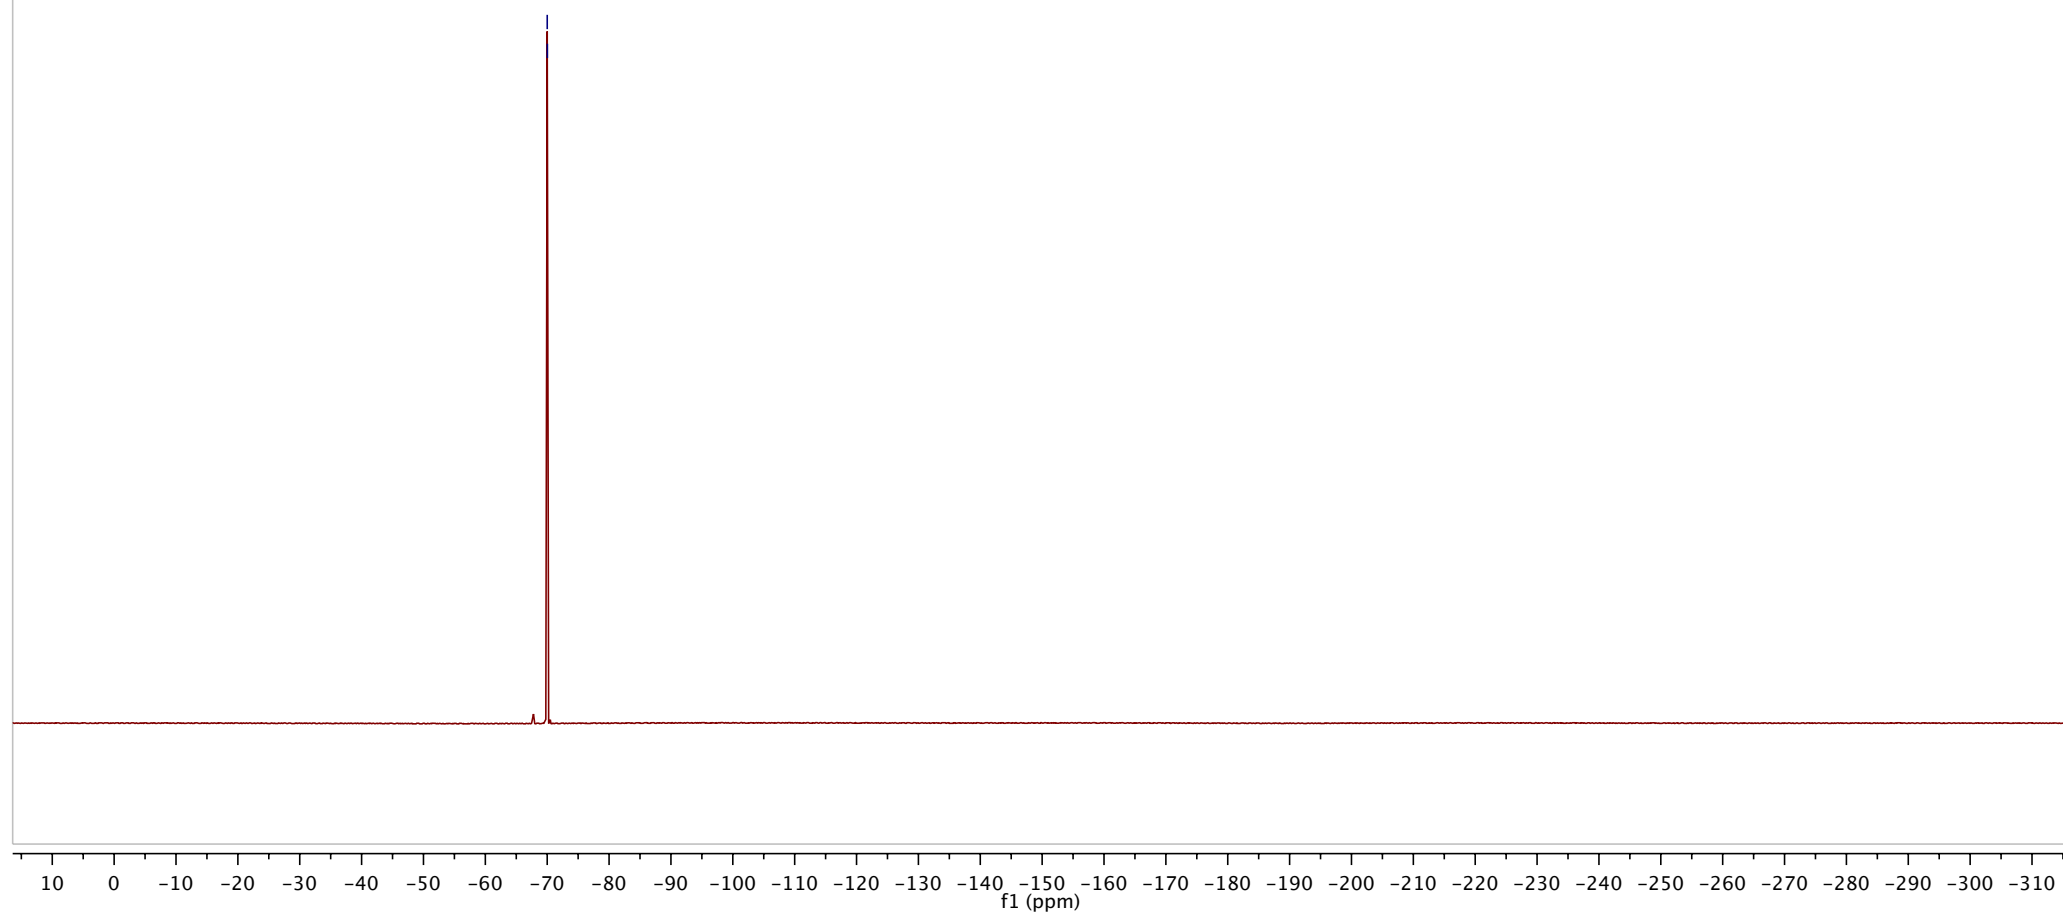

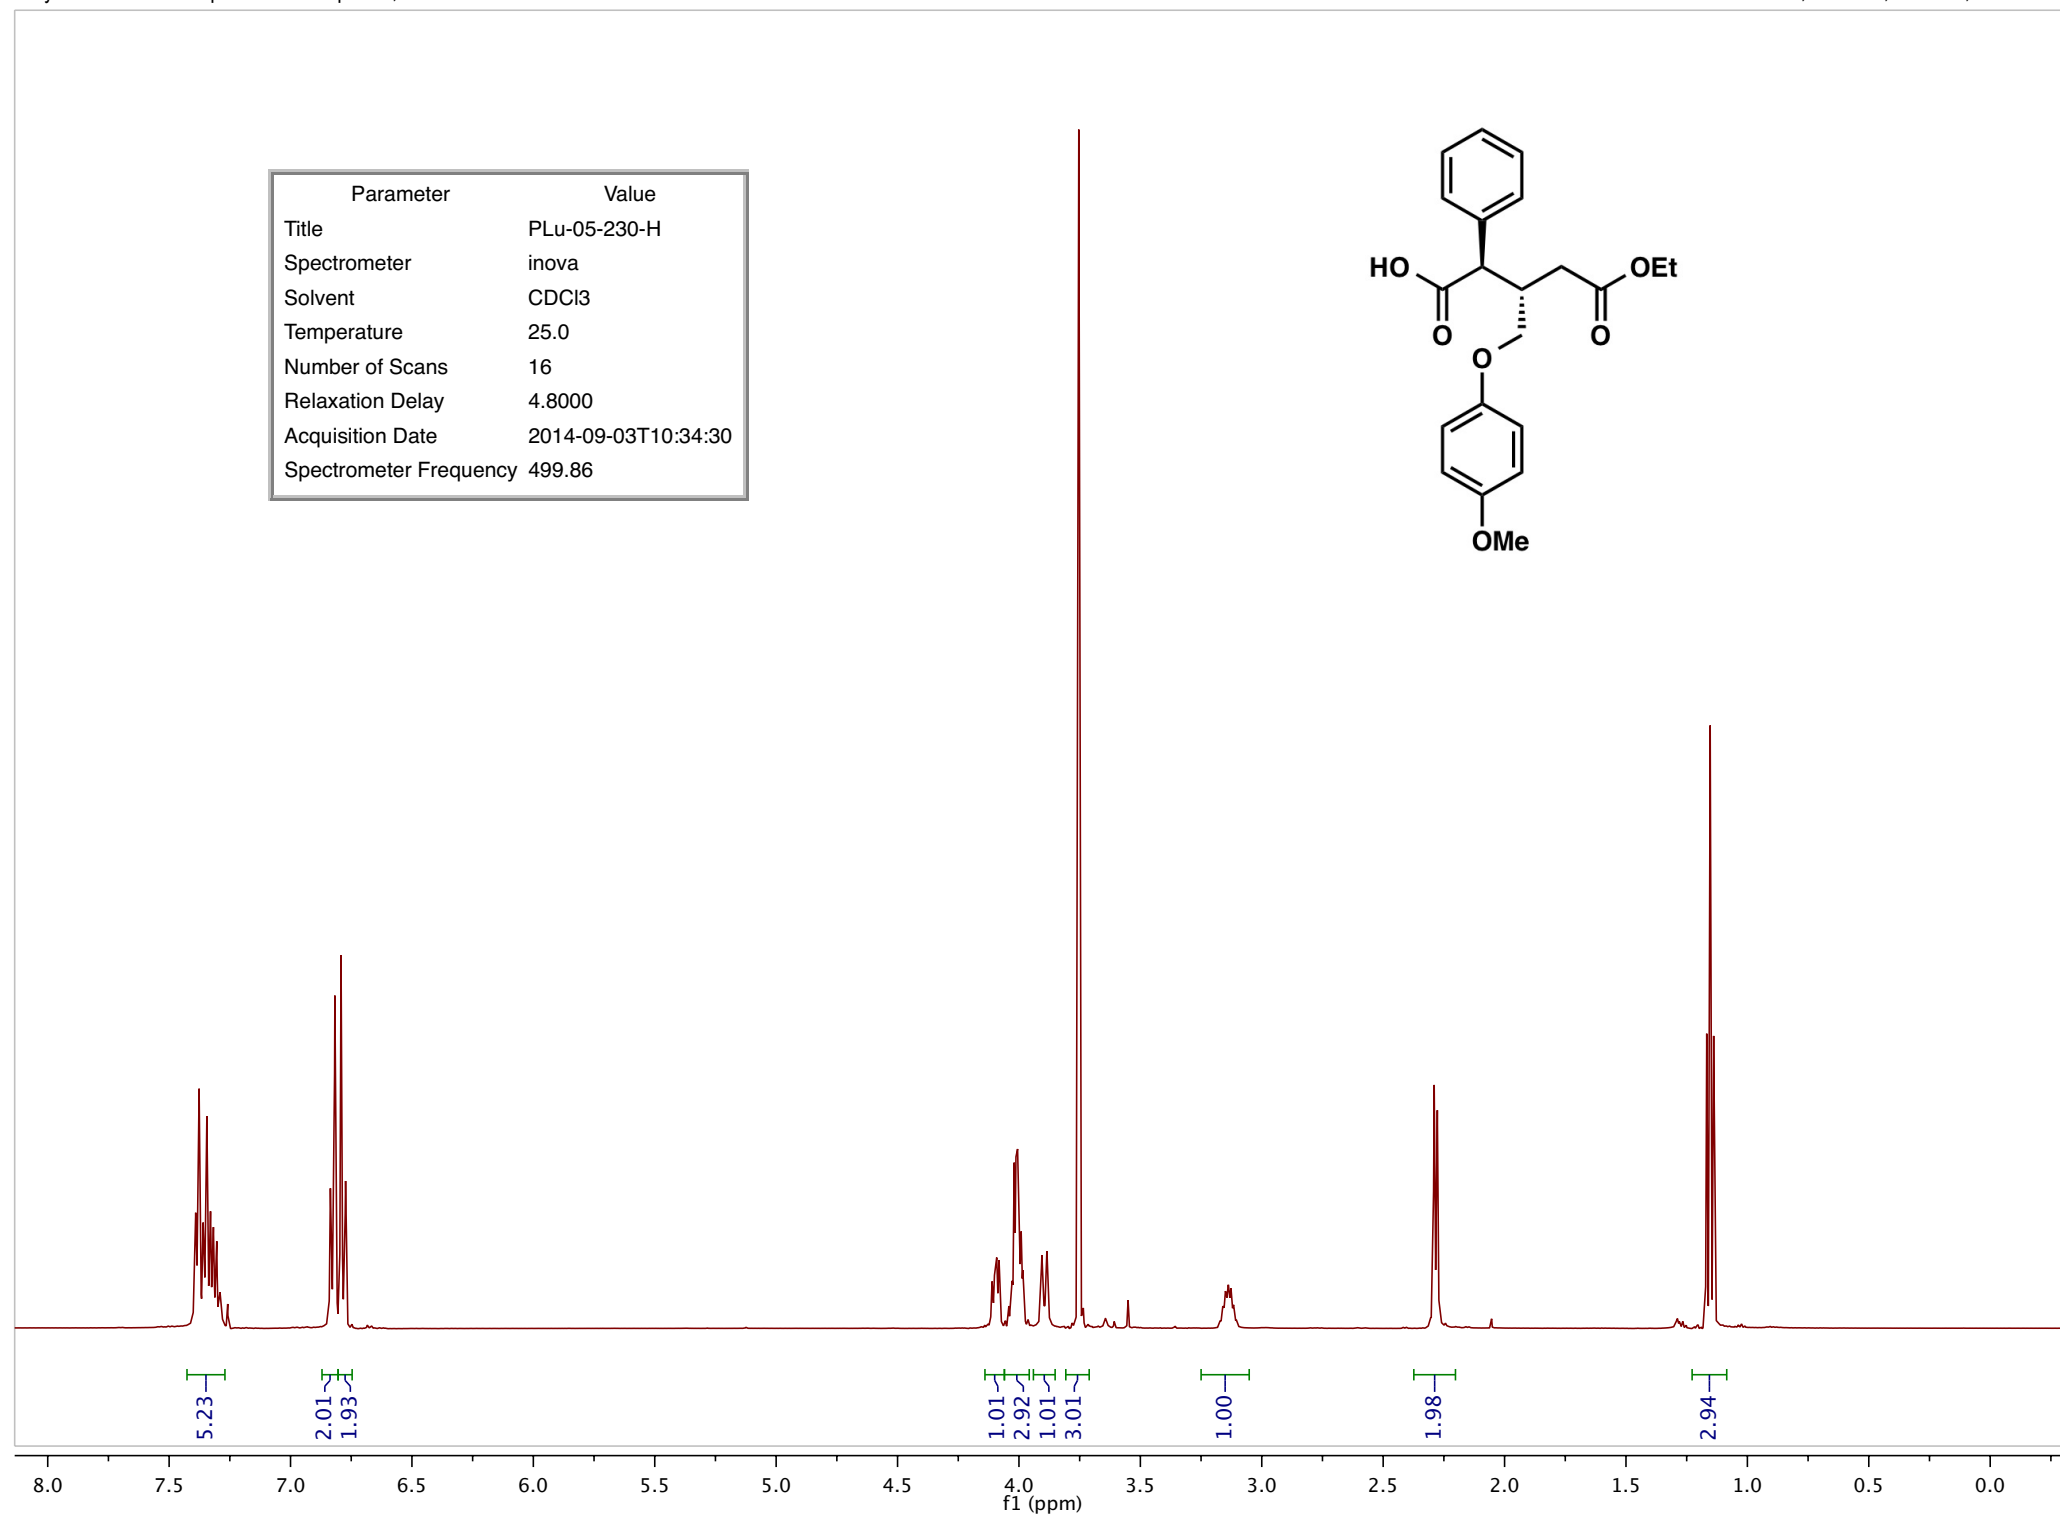

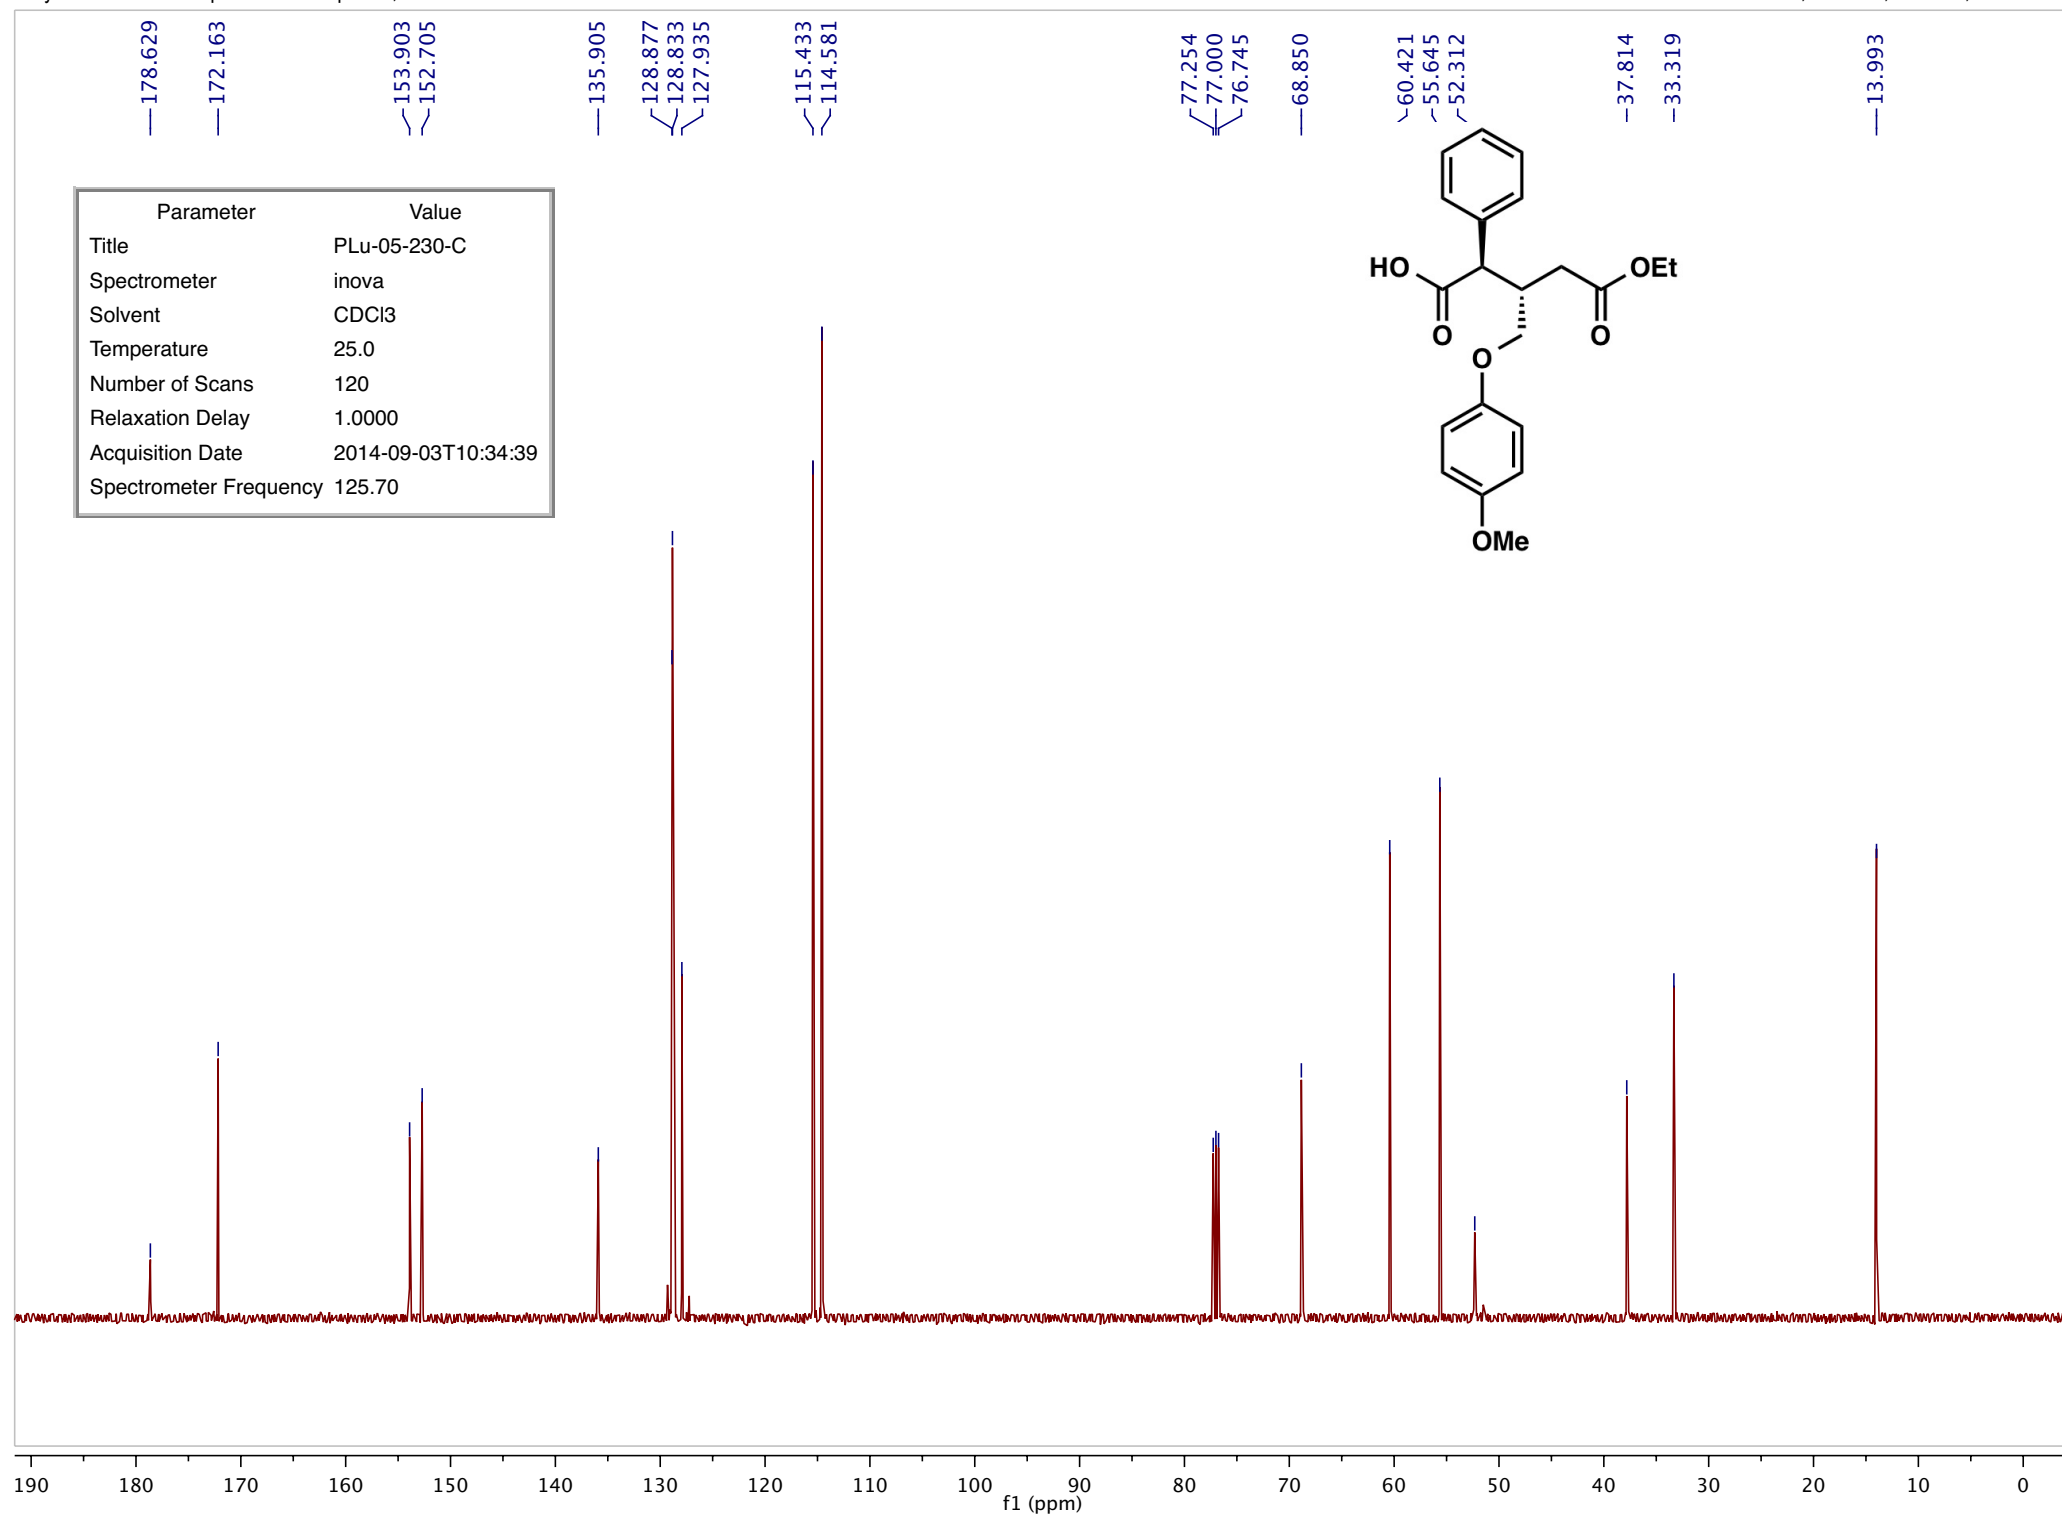

| Parameter              | Value               |
|------------------------|---------------------|
| Title                  | PLu-05-159-MeH      |
| Spectrometer           | inova               |
| Solvent                | cdcl3               |
| Temperature            | 25.0                |
| Number of Scans        | 8                   |
| Relaxation Delay       | 8.0000              |
| Acquisition Date       | 2014-07-14T12:52:38 |
| Spectrometer Frequency | 499.86              |

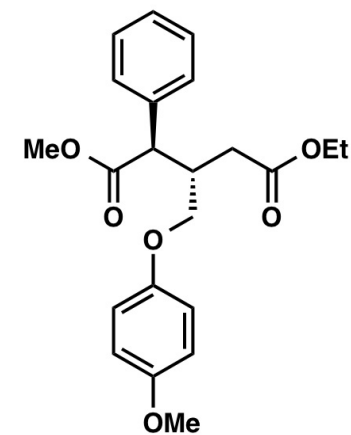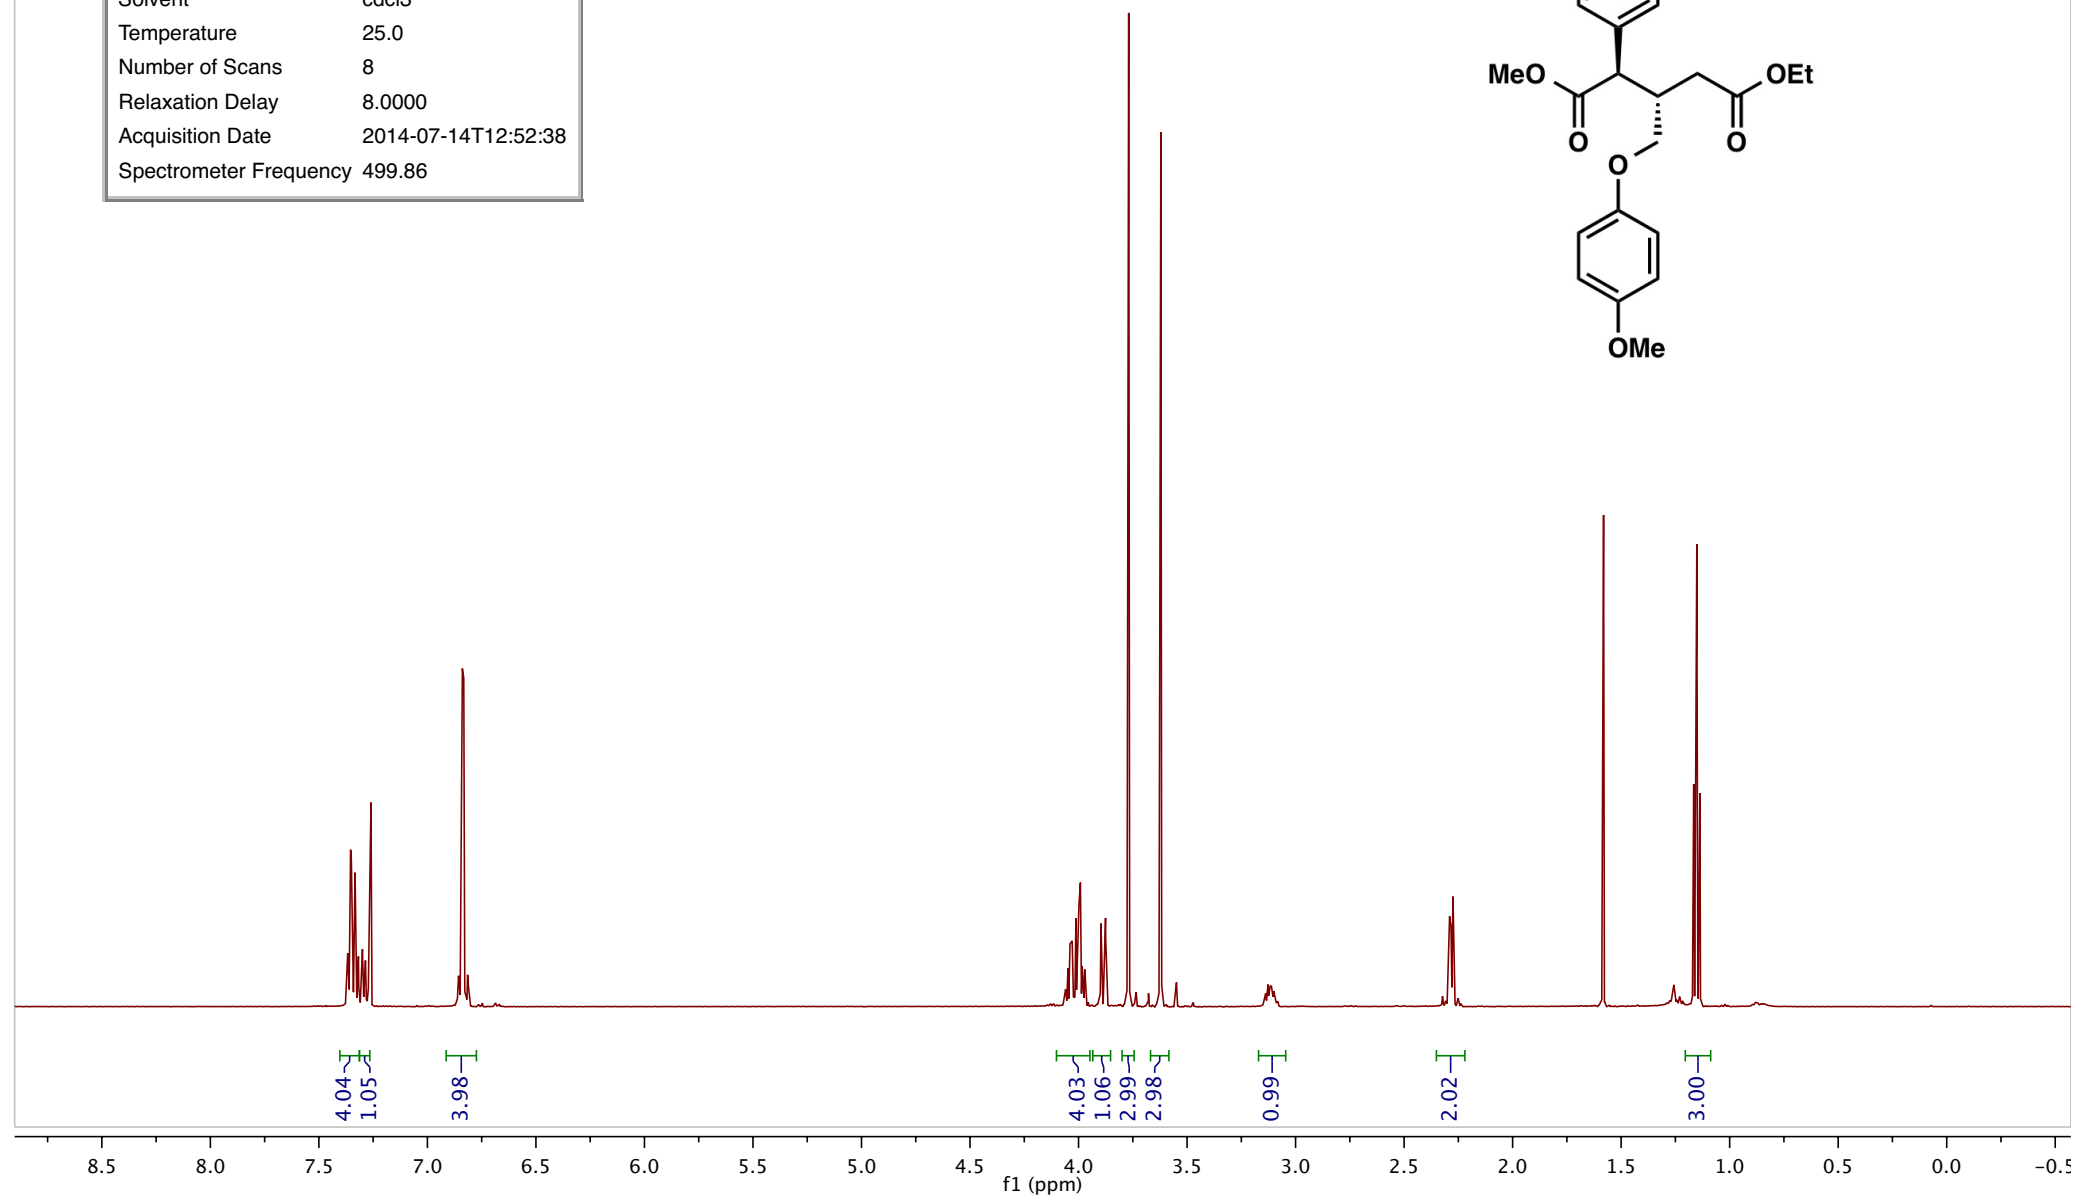



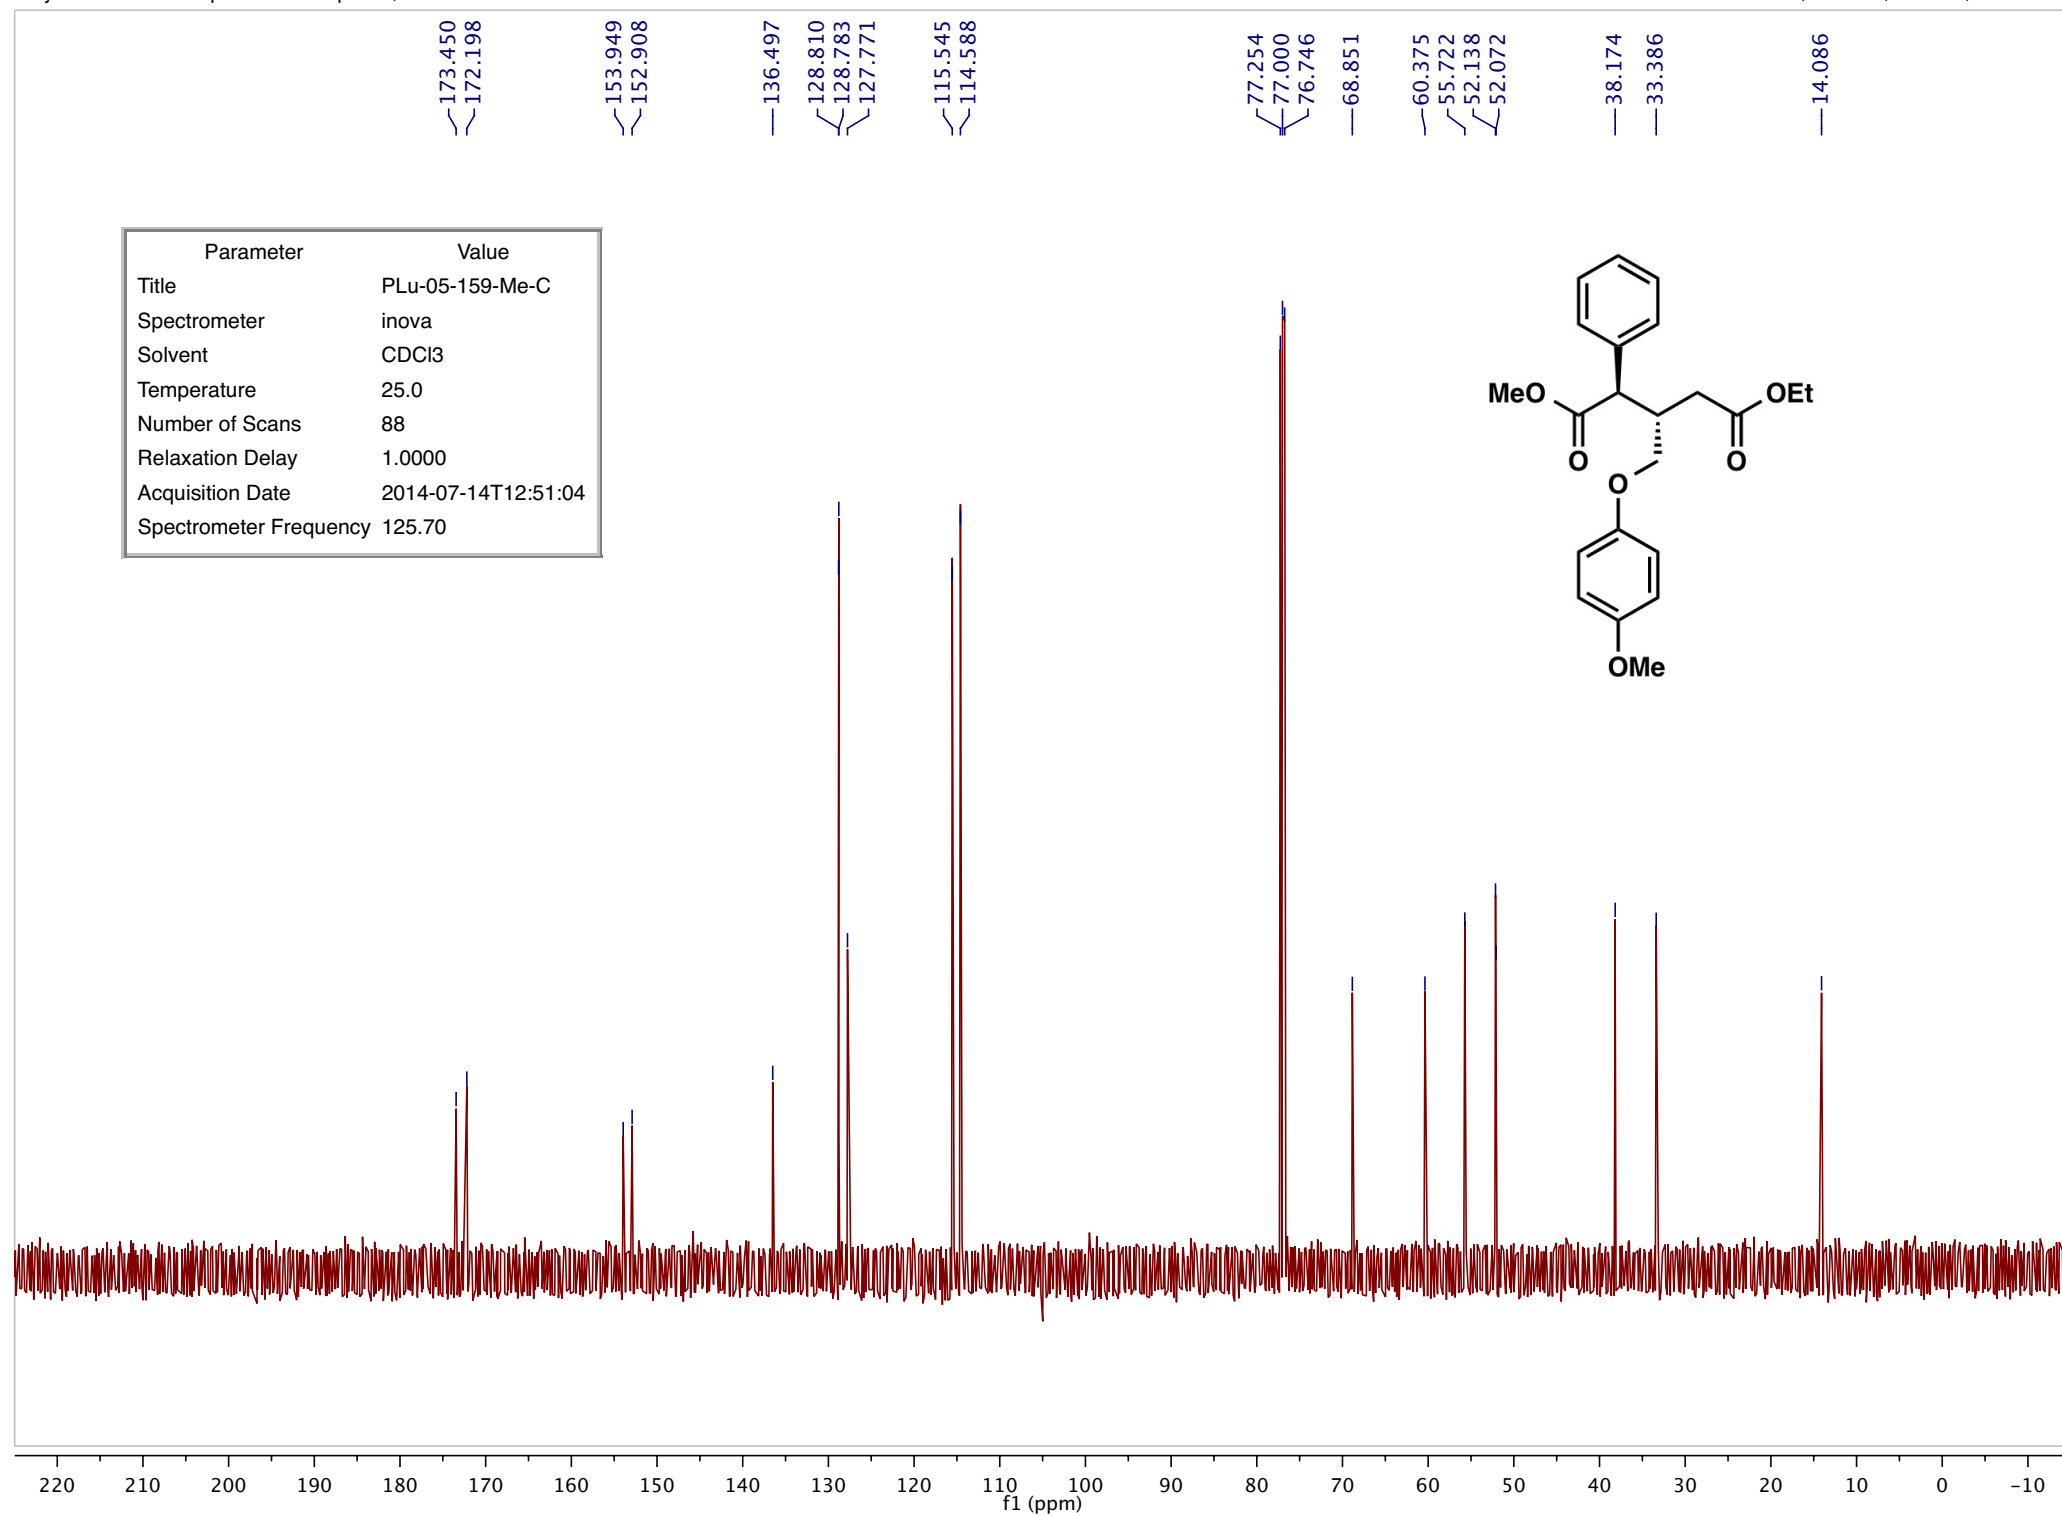

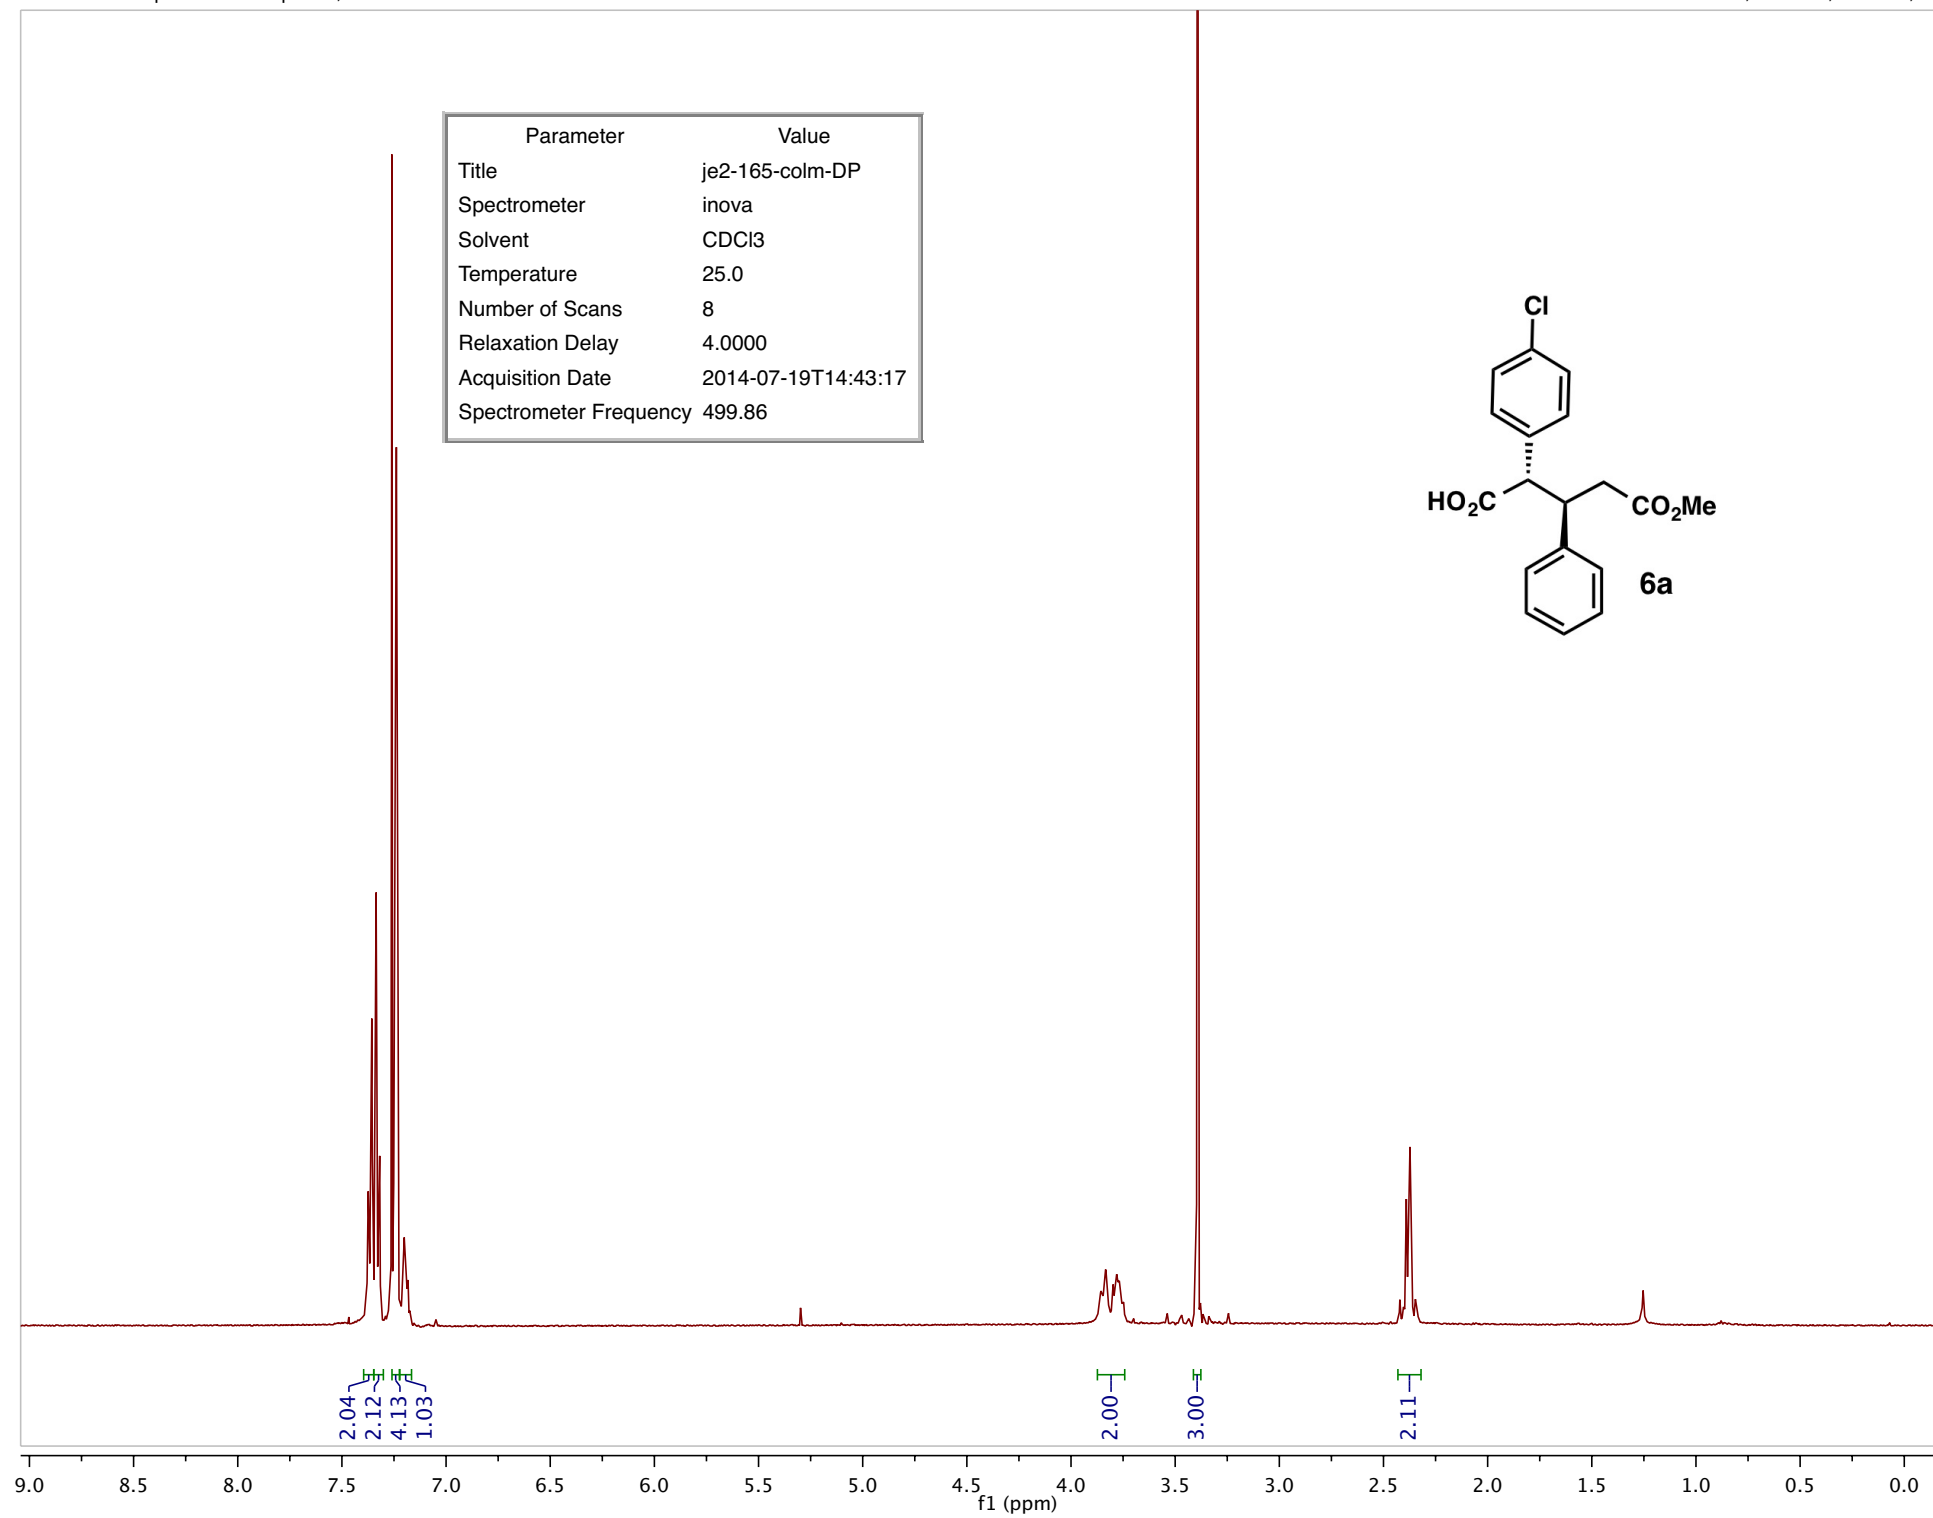

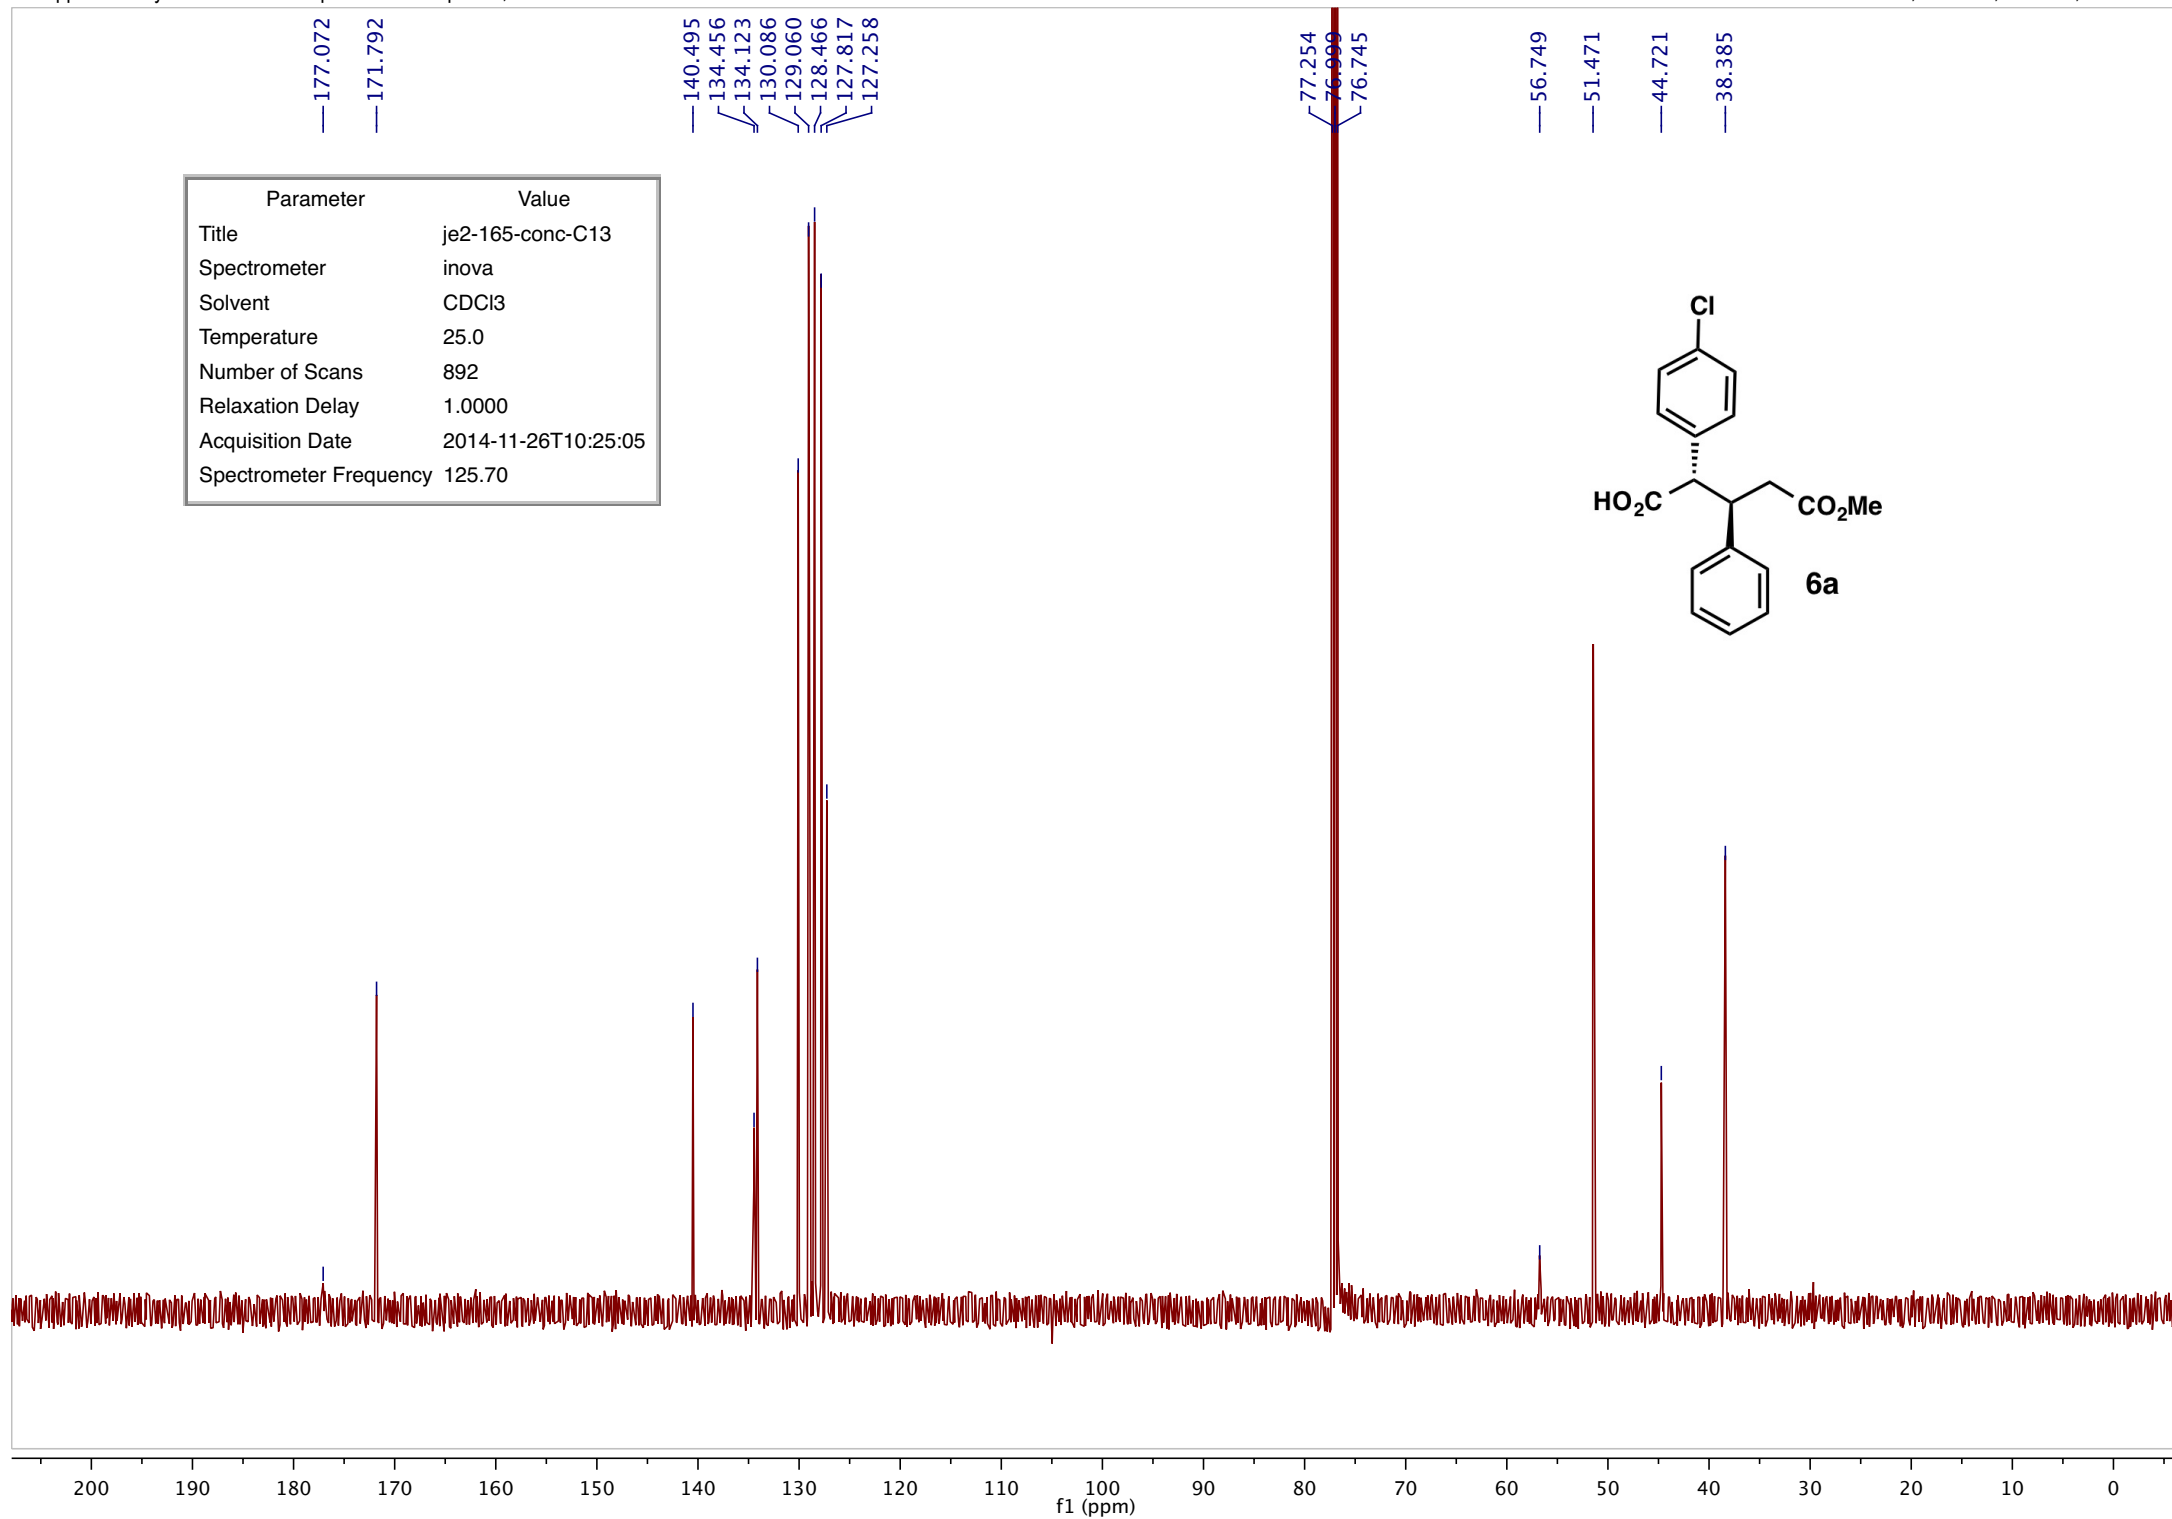

| Parameter              | Value               |
|------------------------|---------------------|
| Title                  | je2-168-colm-chk    |
| Spectrometer           | inova               |
| Solvent                | CDCl <sub>3</sub>   |
| Temperature            | 25.0                |
| Number of Scans        | 12                  |
| Relaxation Delay       | 4.0000              |
| Acquisition Date       | 2014-11-08T15:53:23 |
| Spectrometer Frequency | 499.86              |

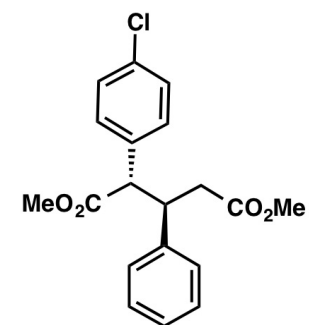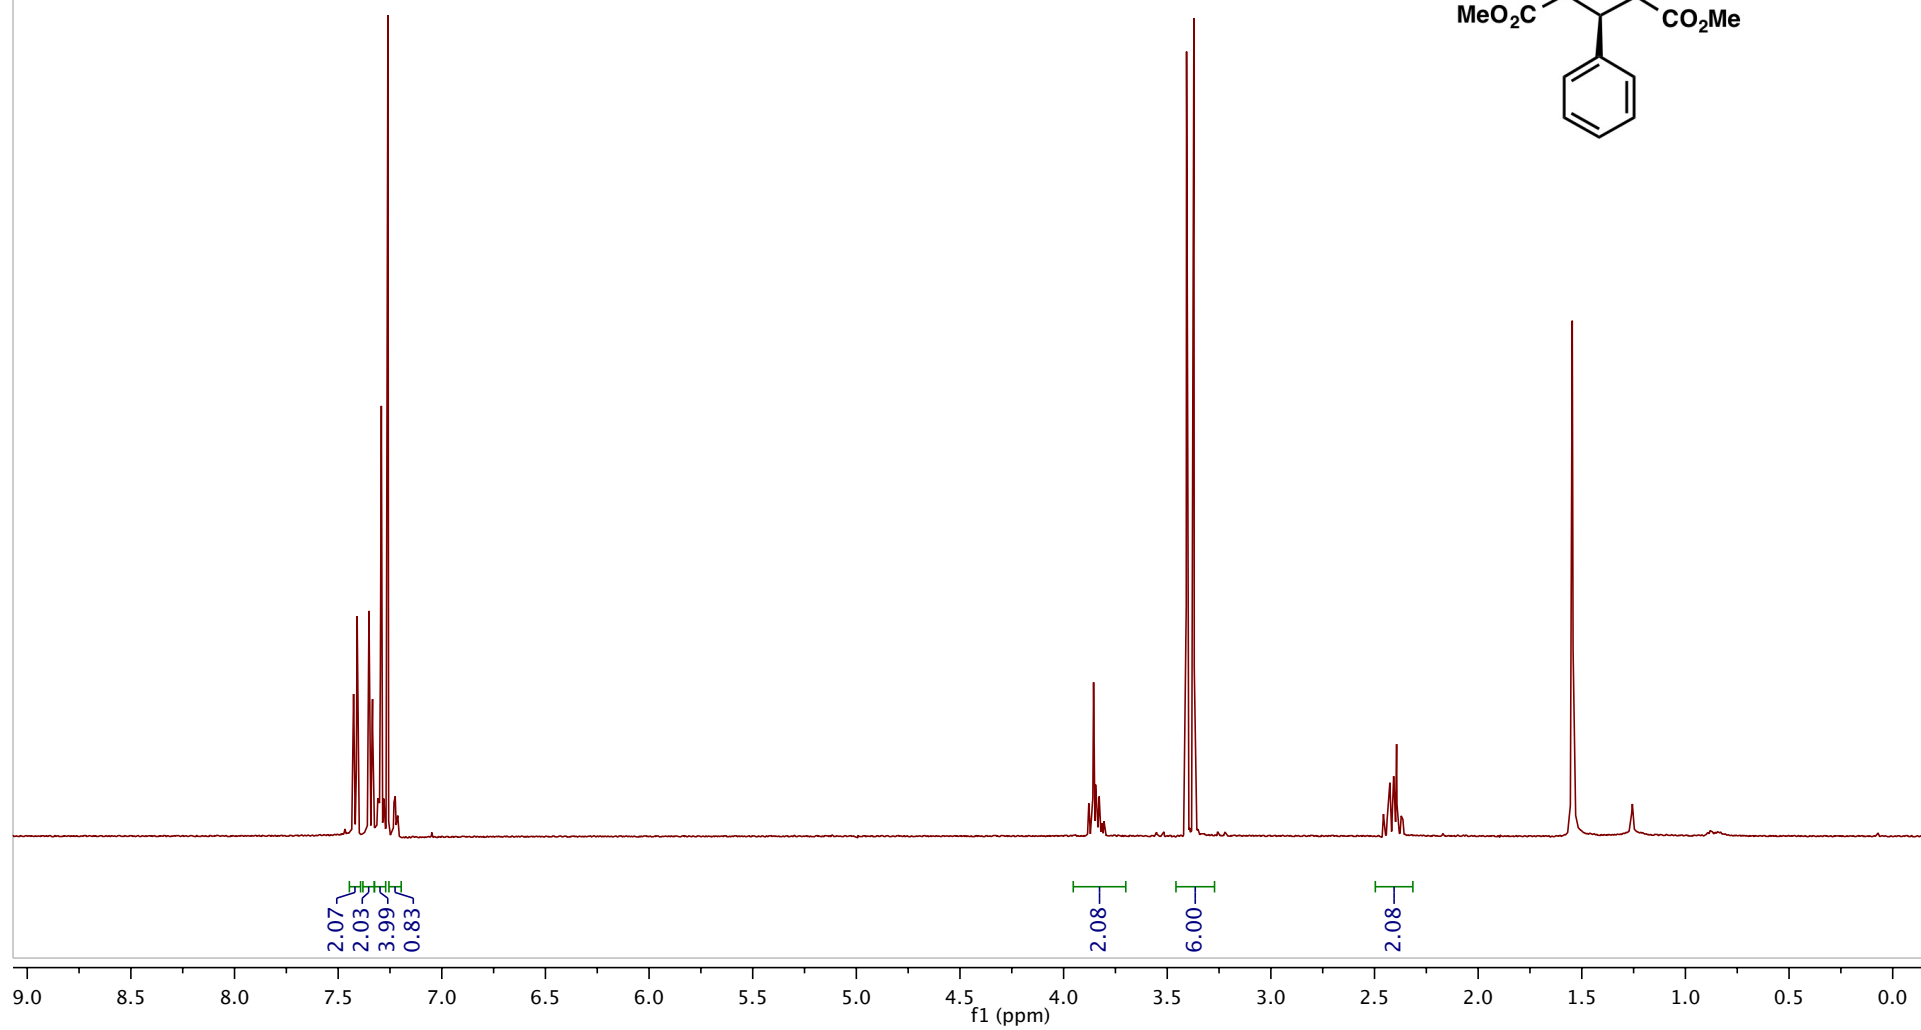

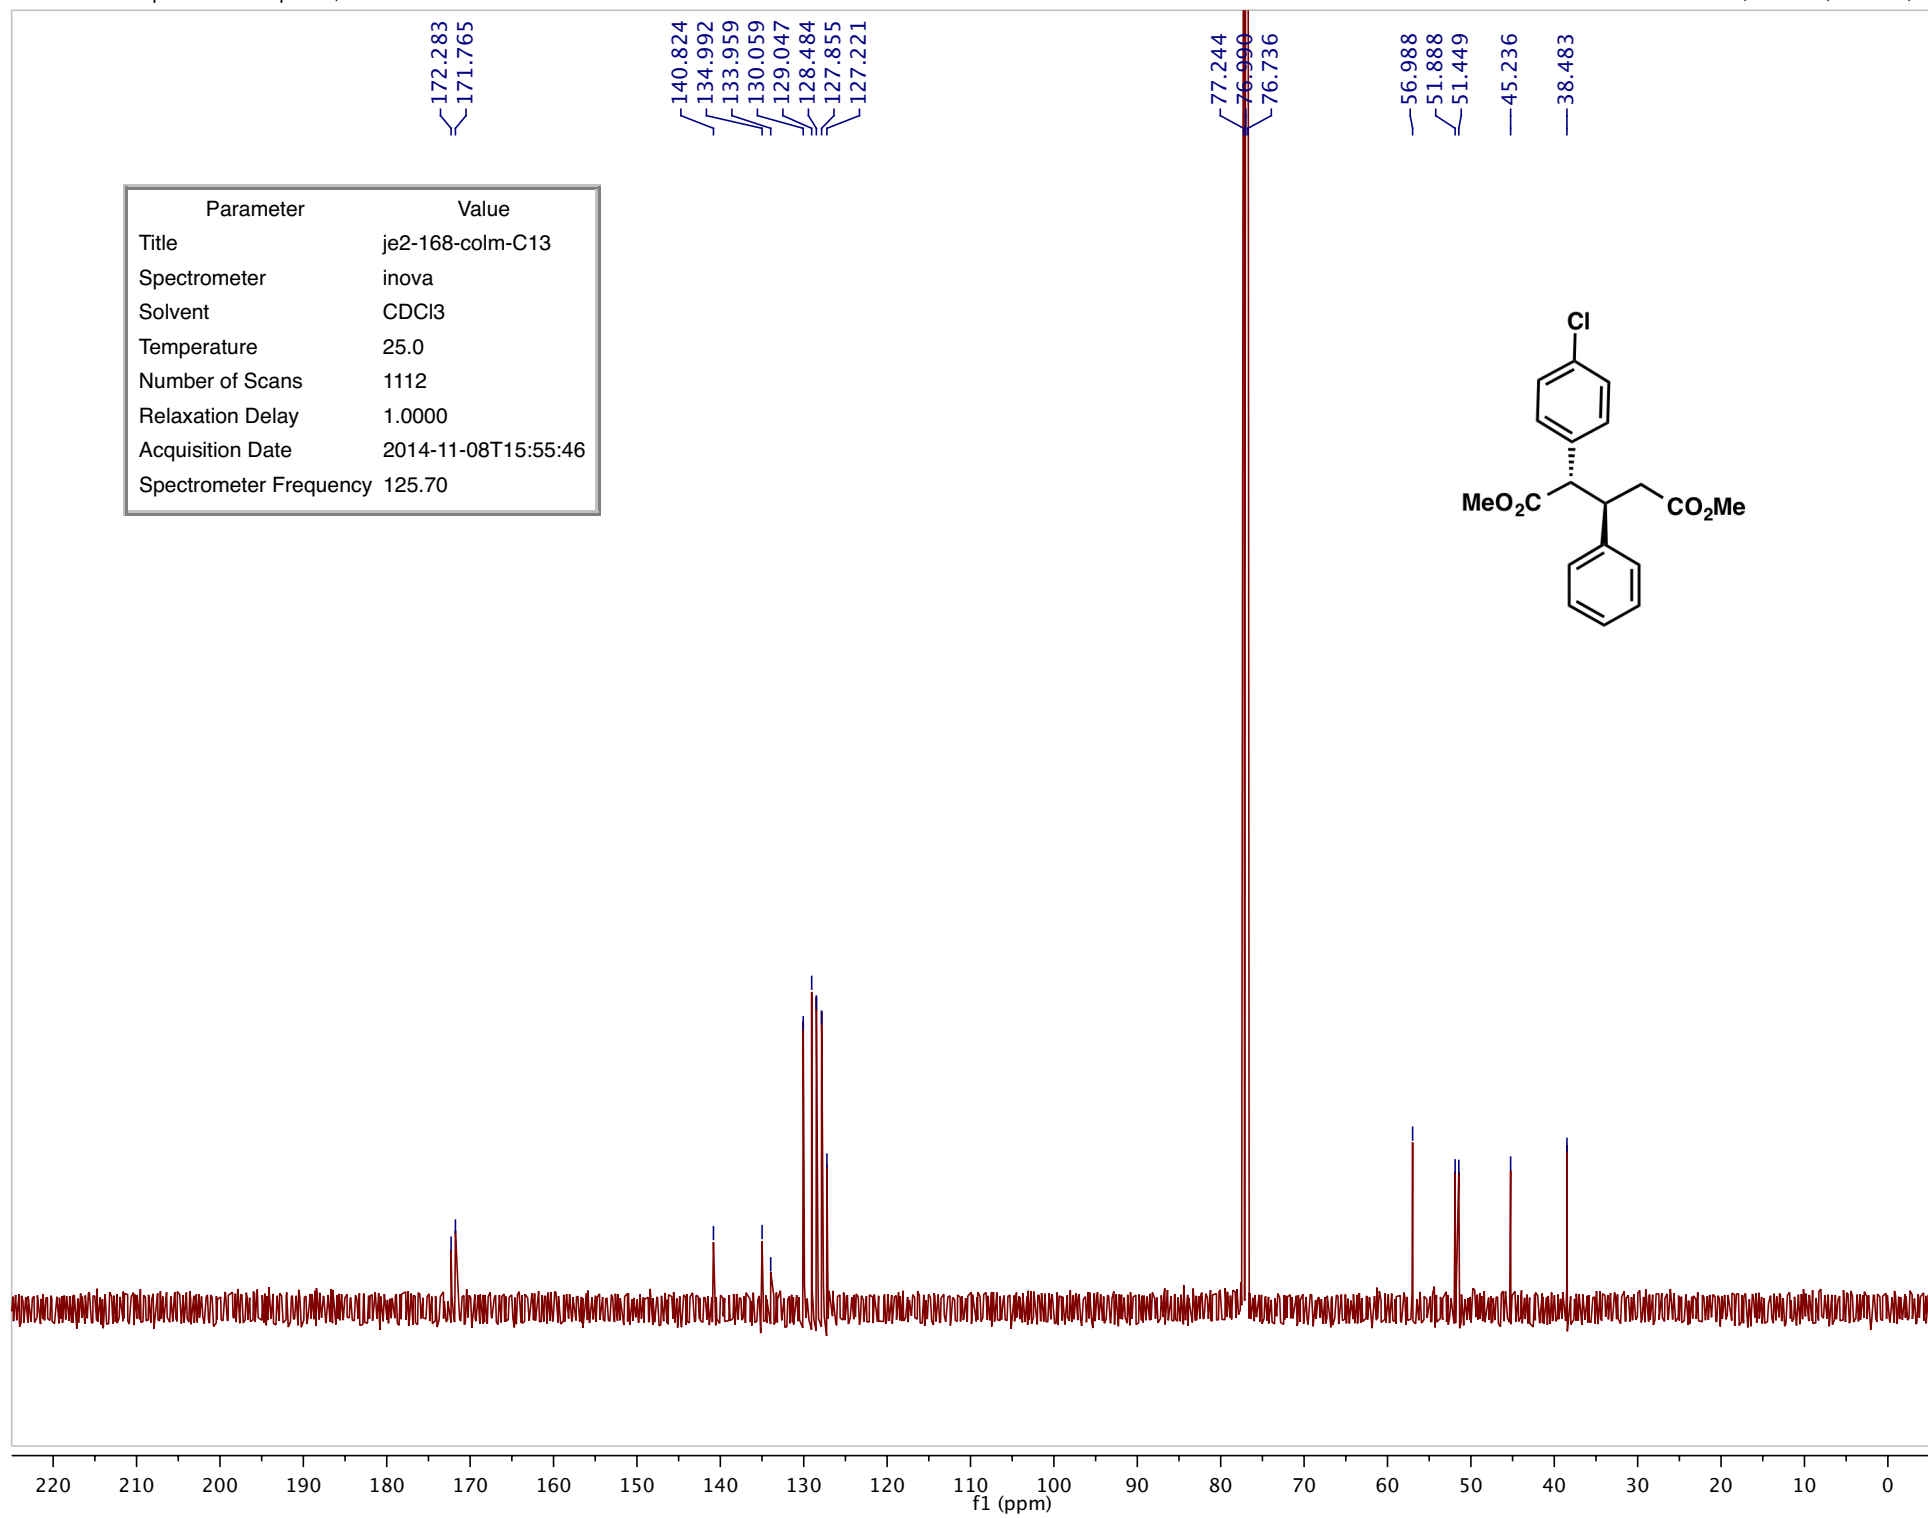

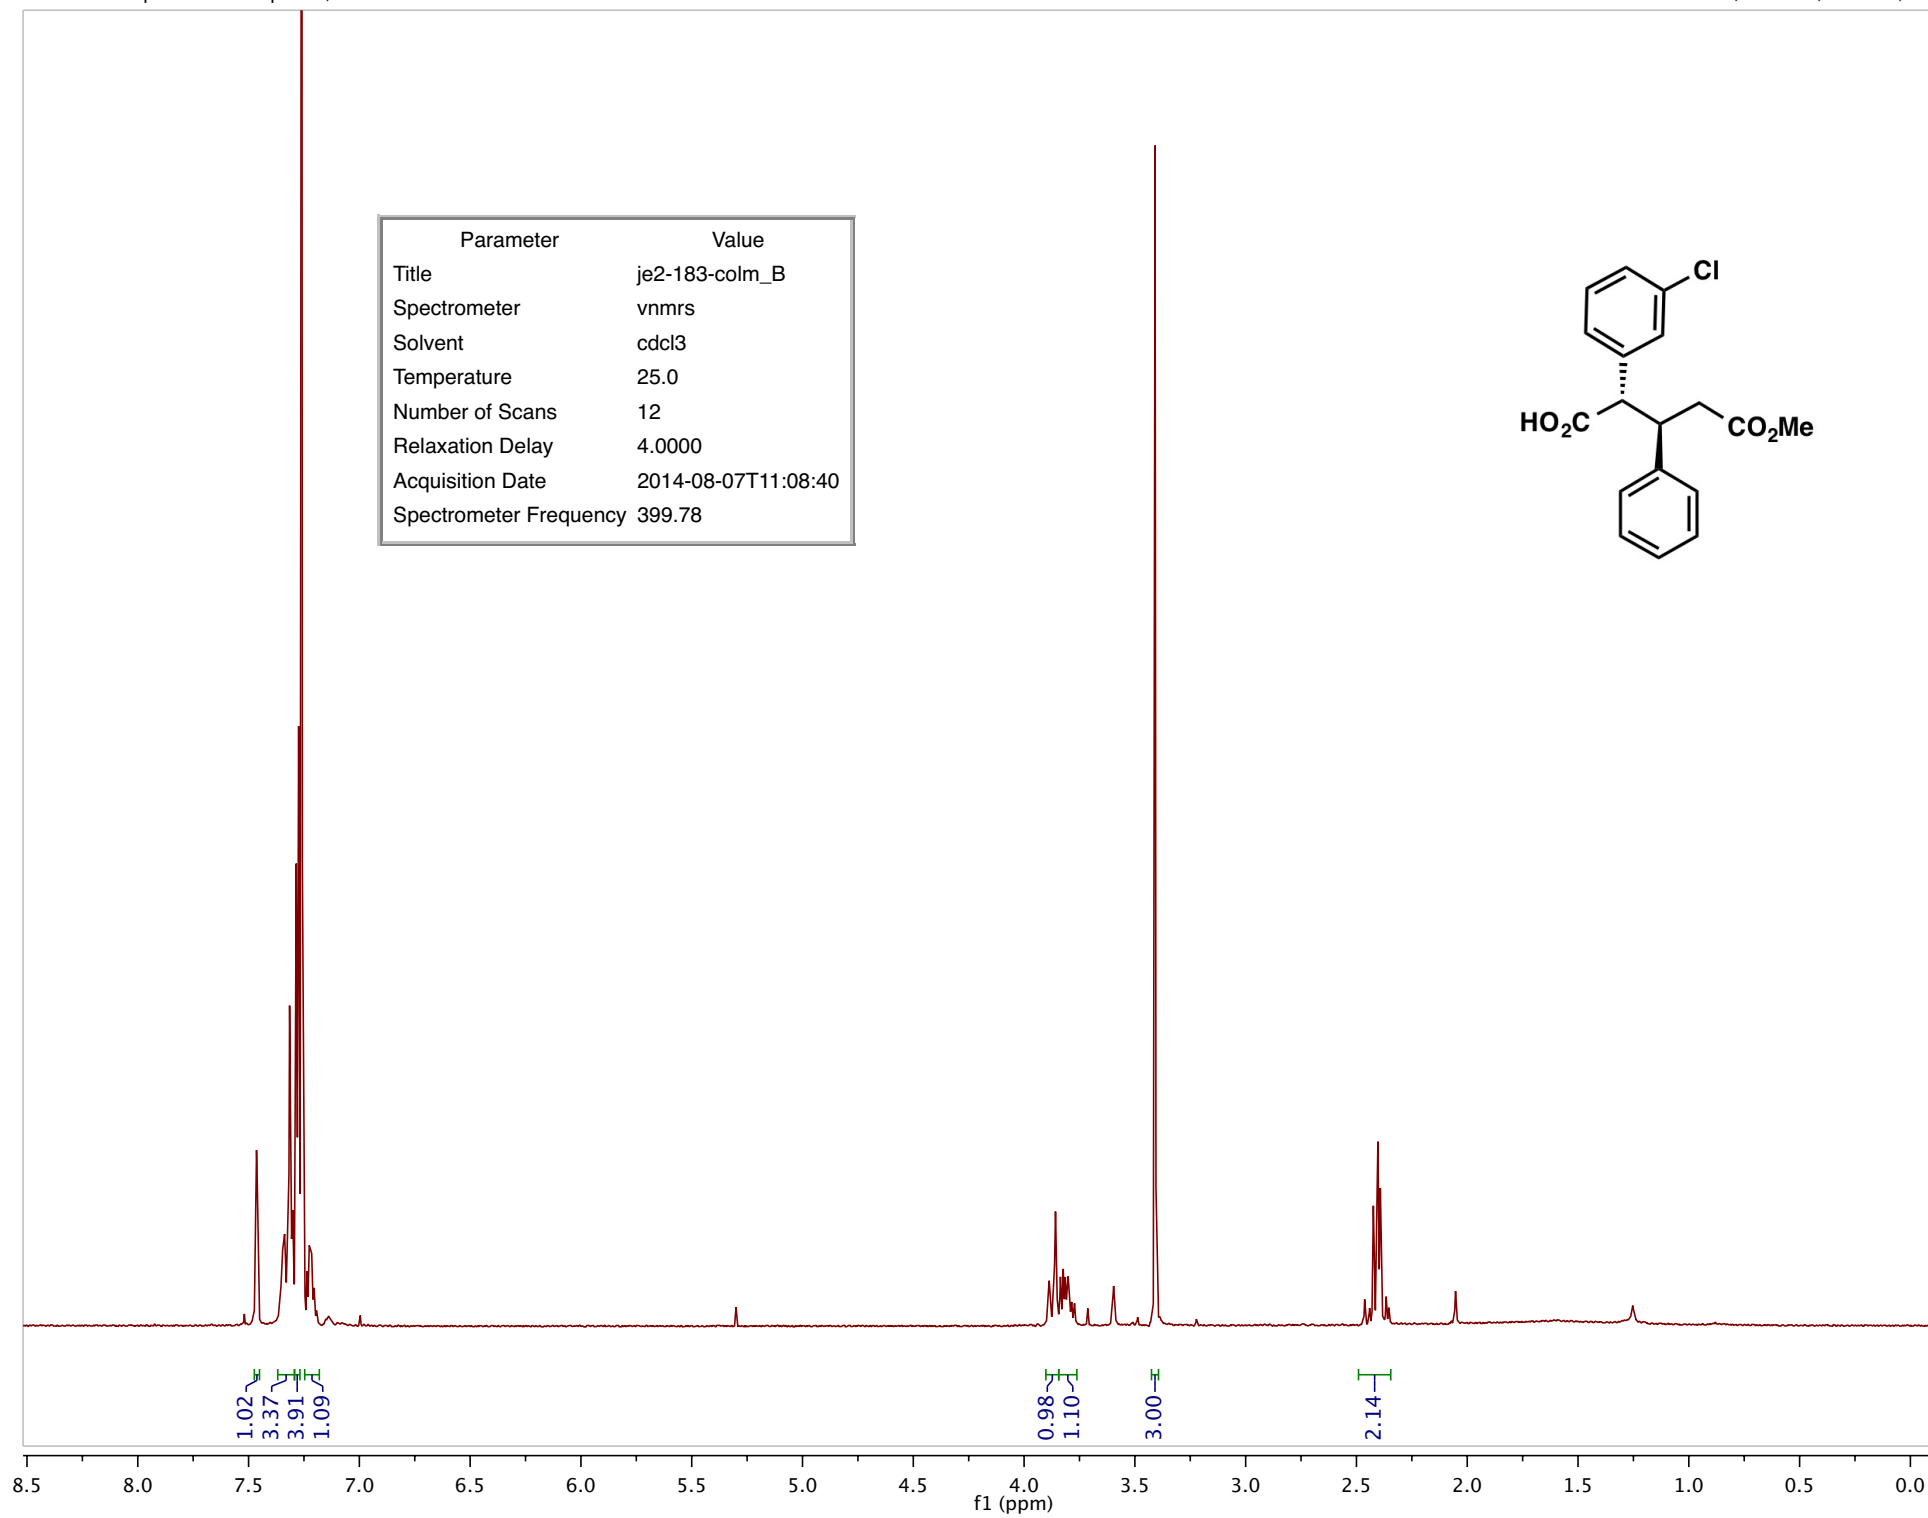

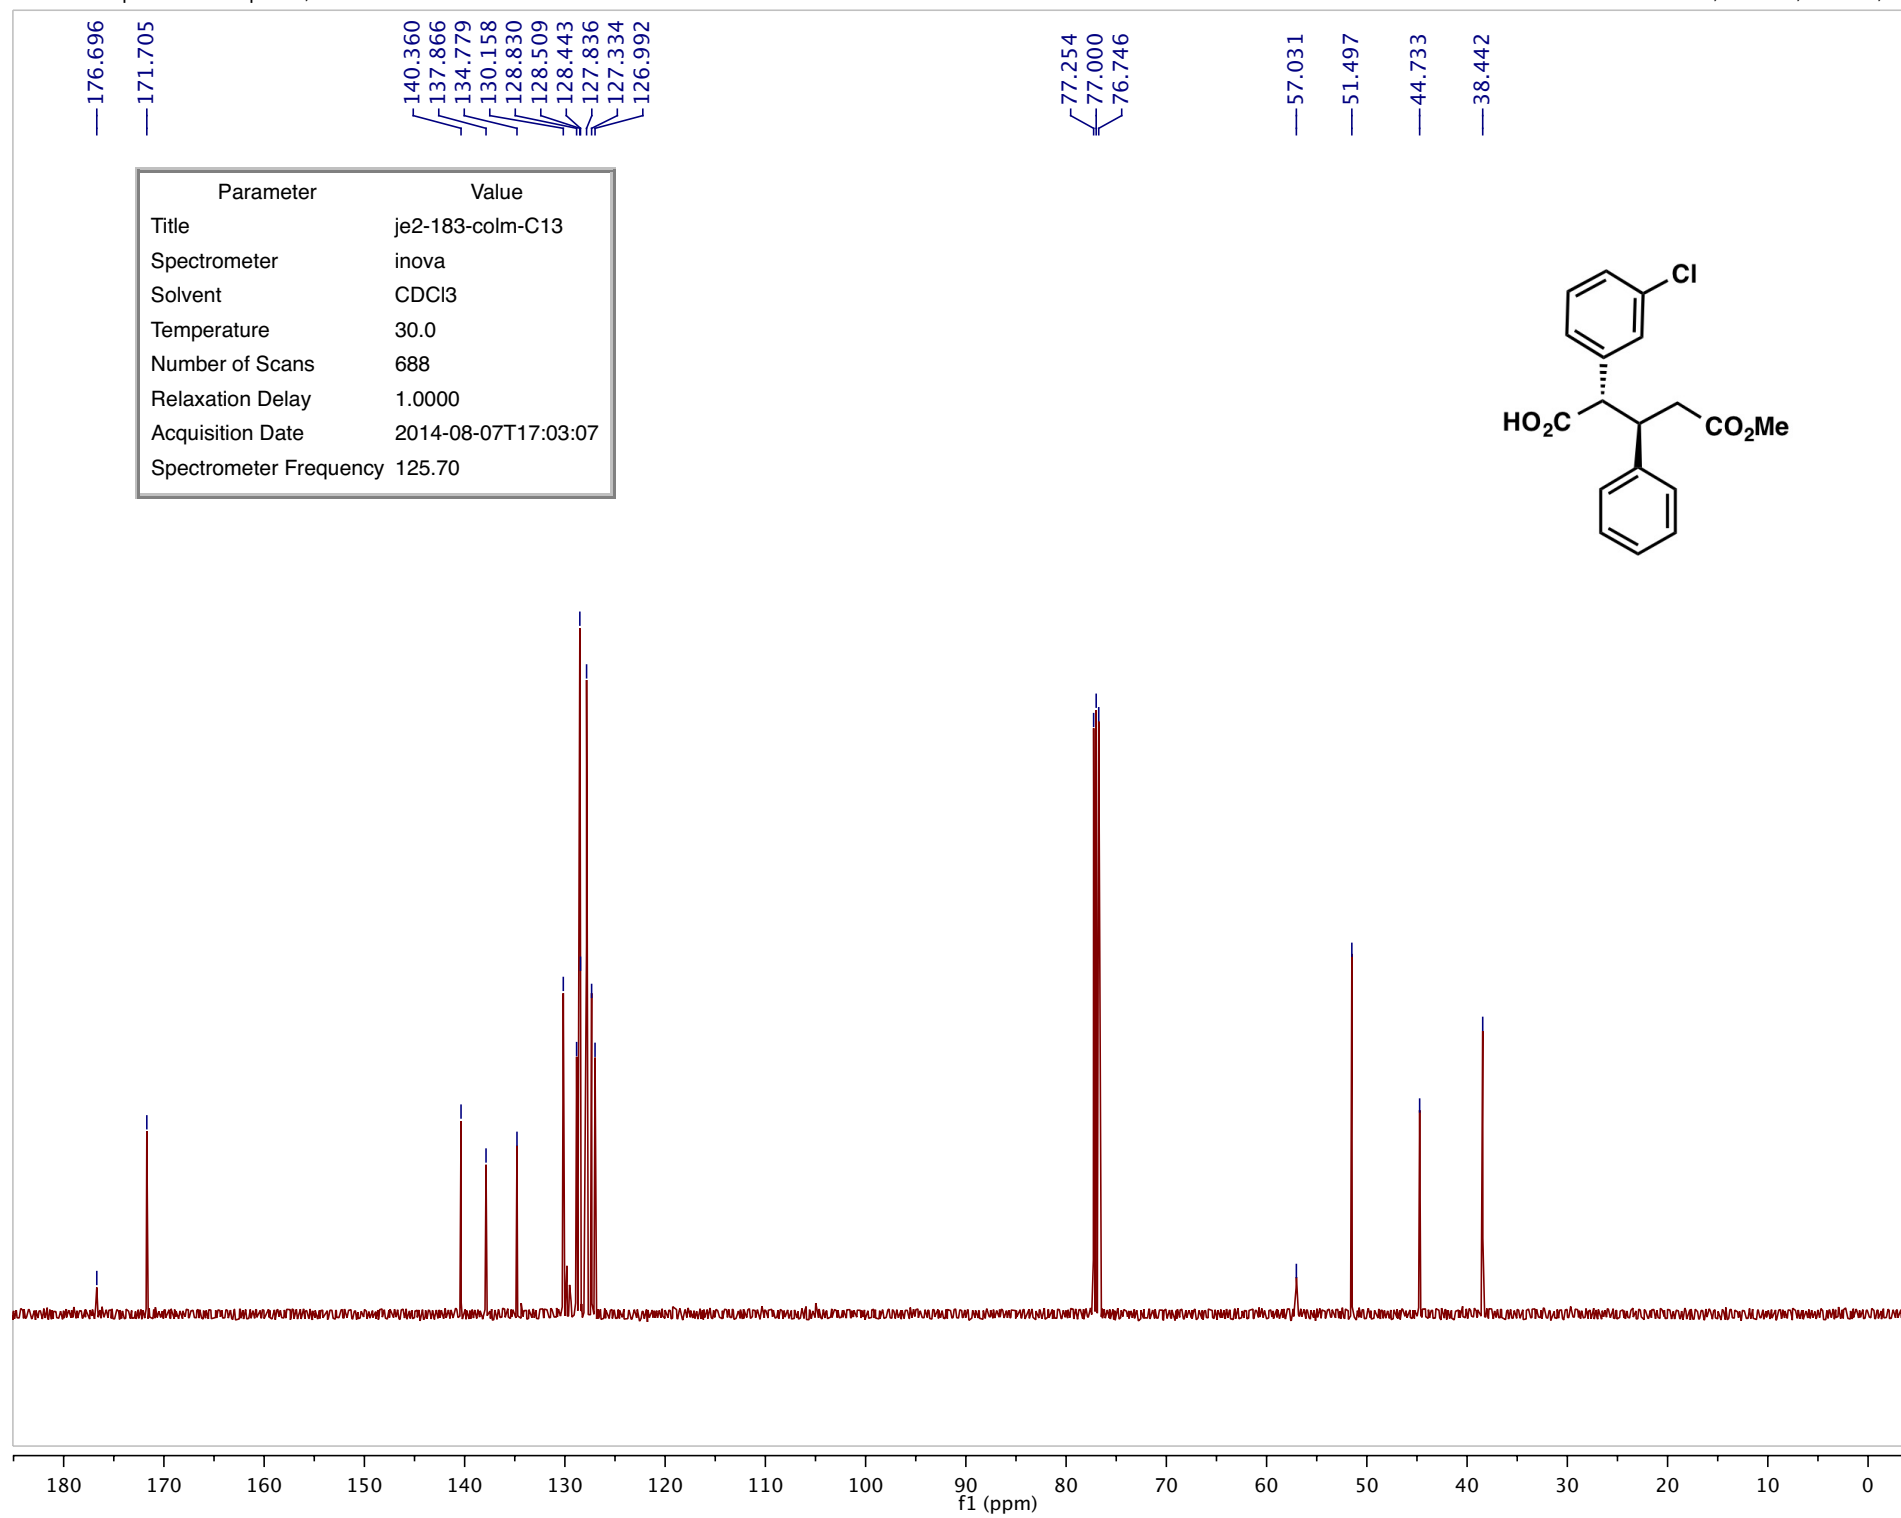

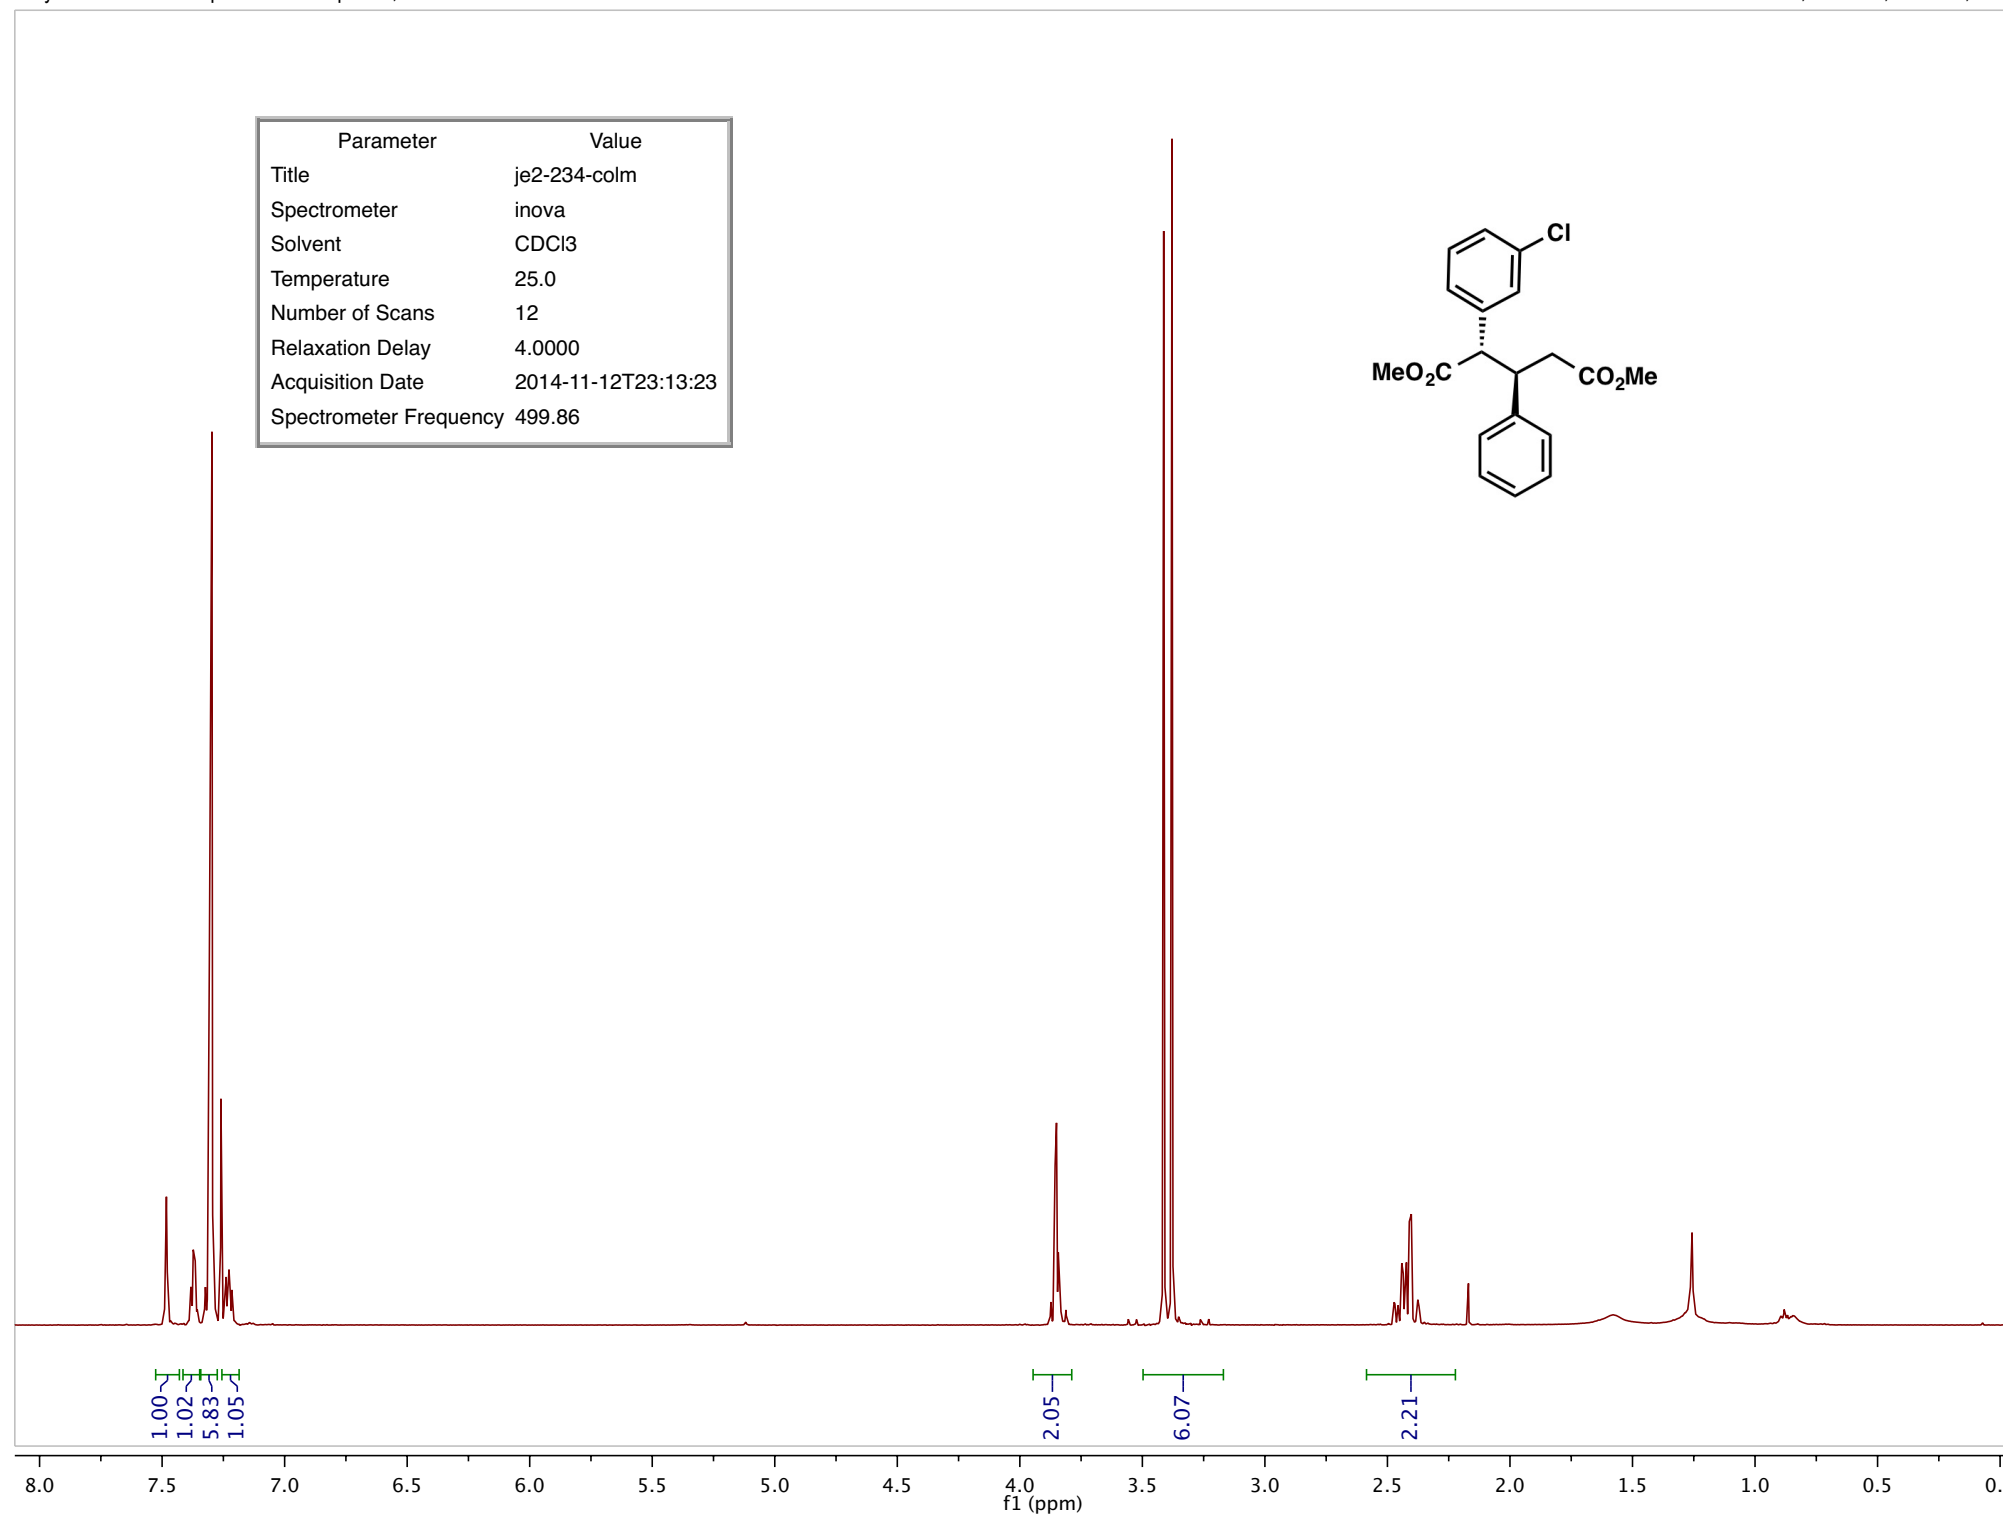



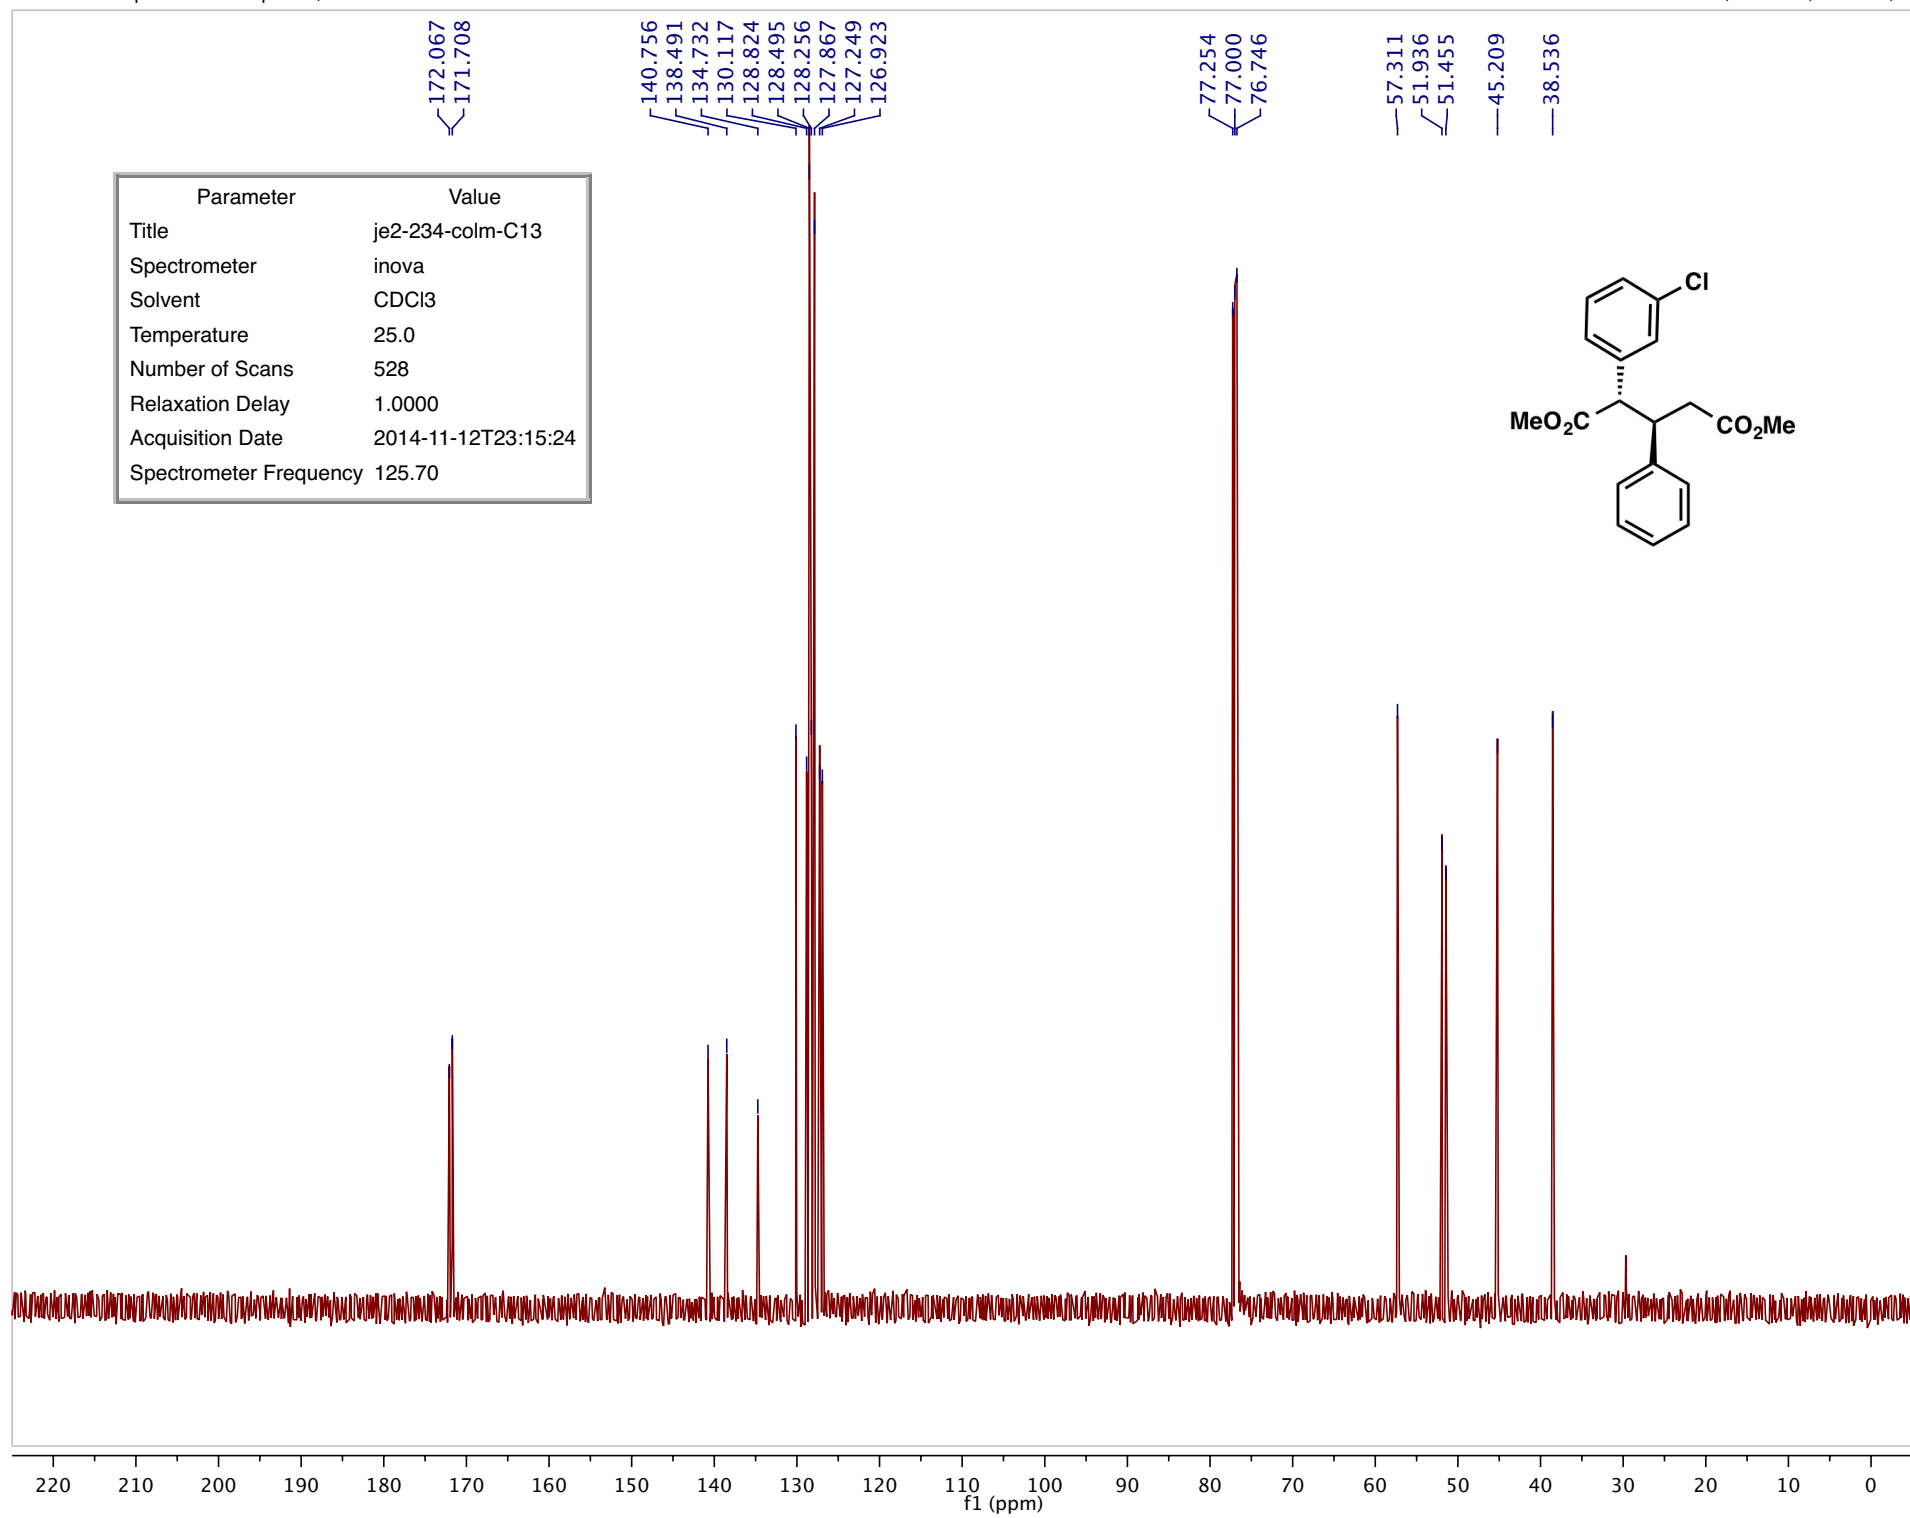

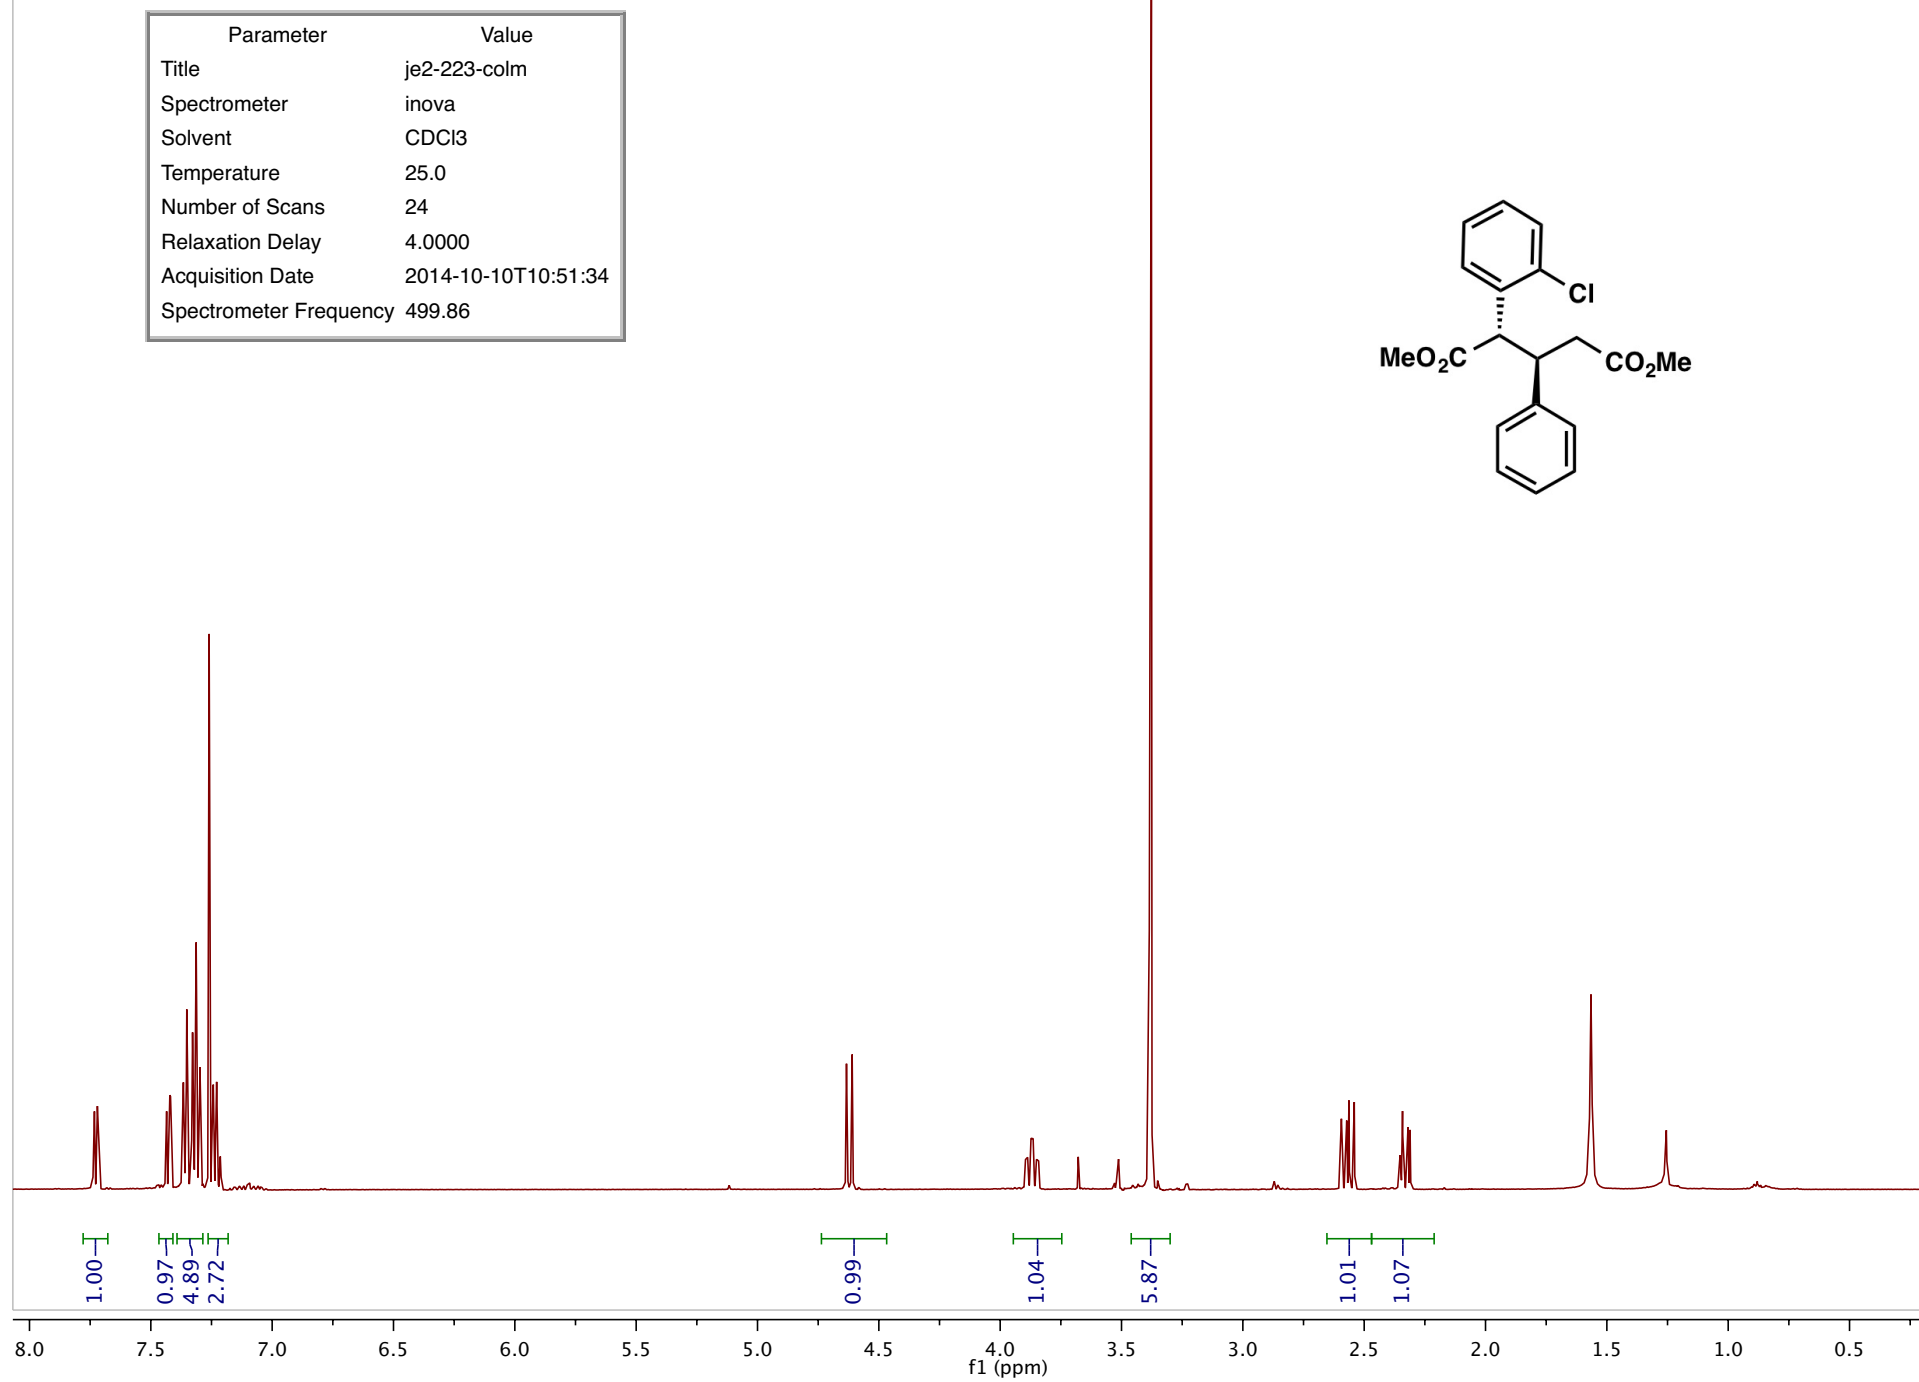

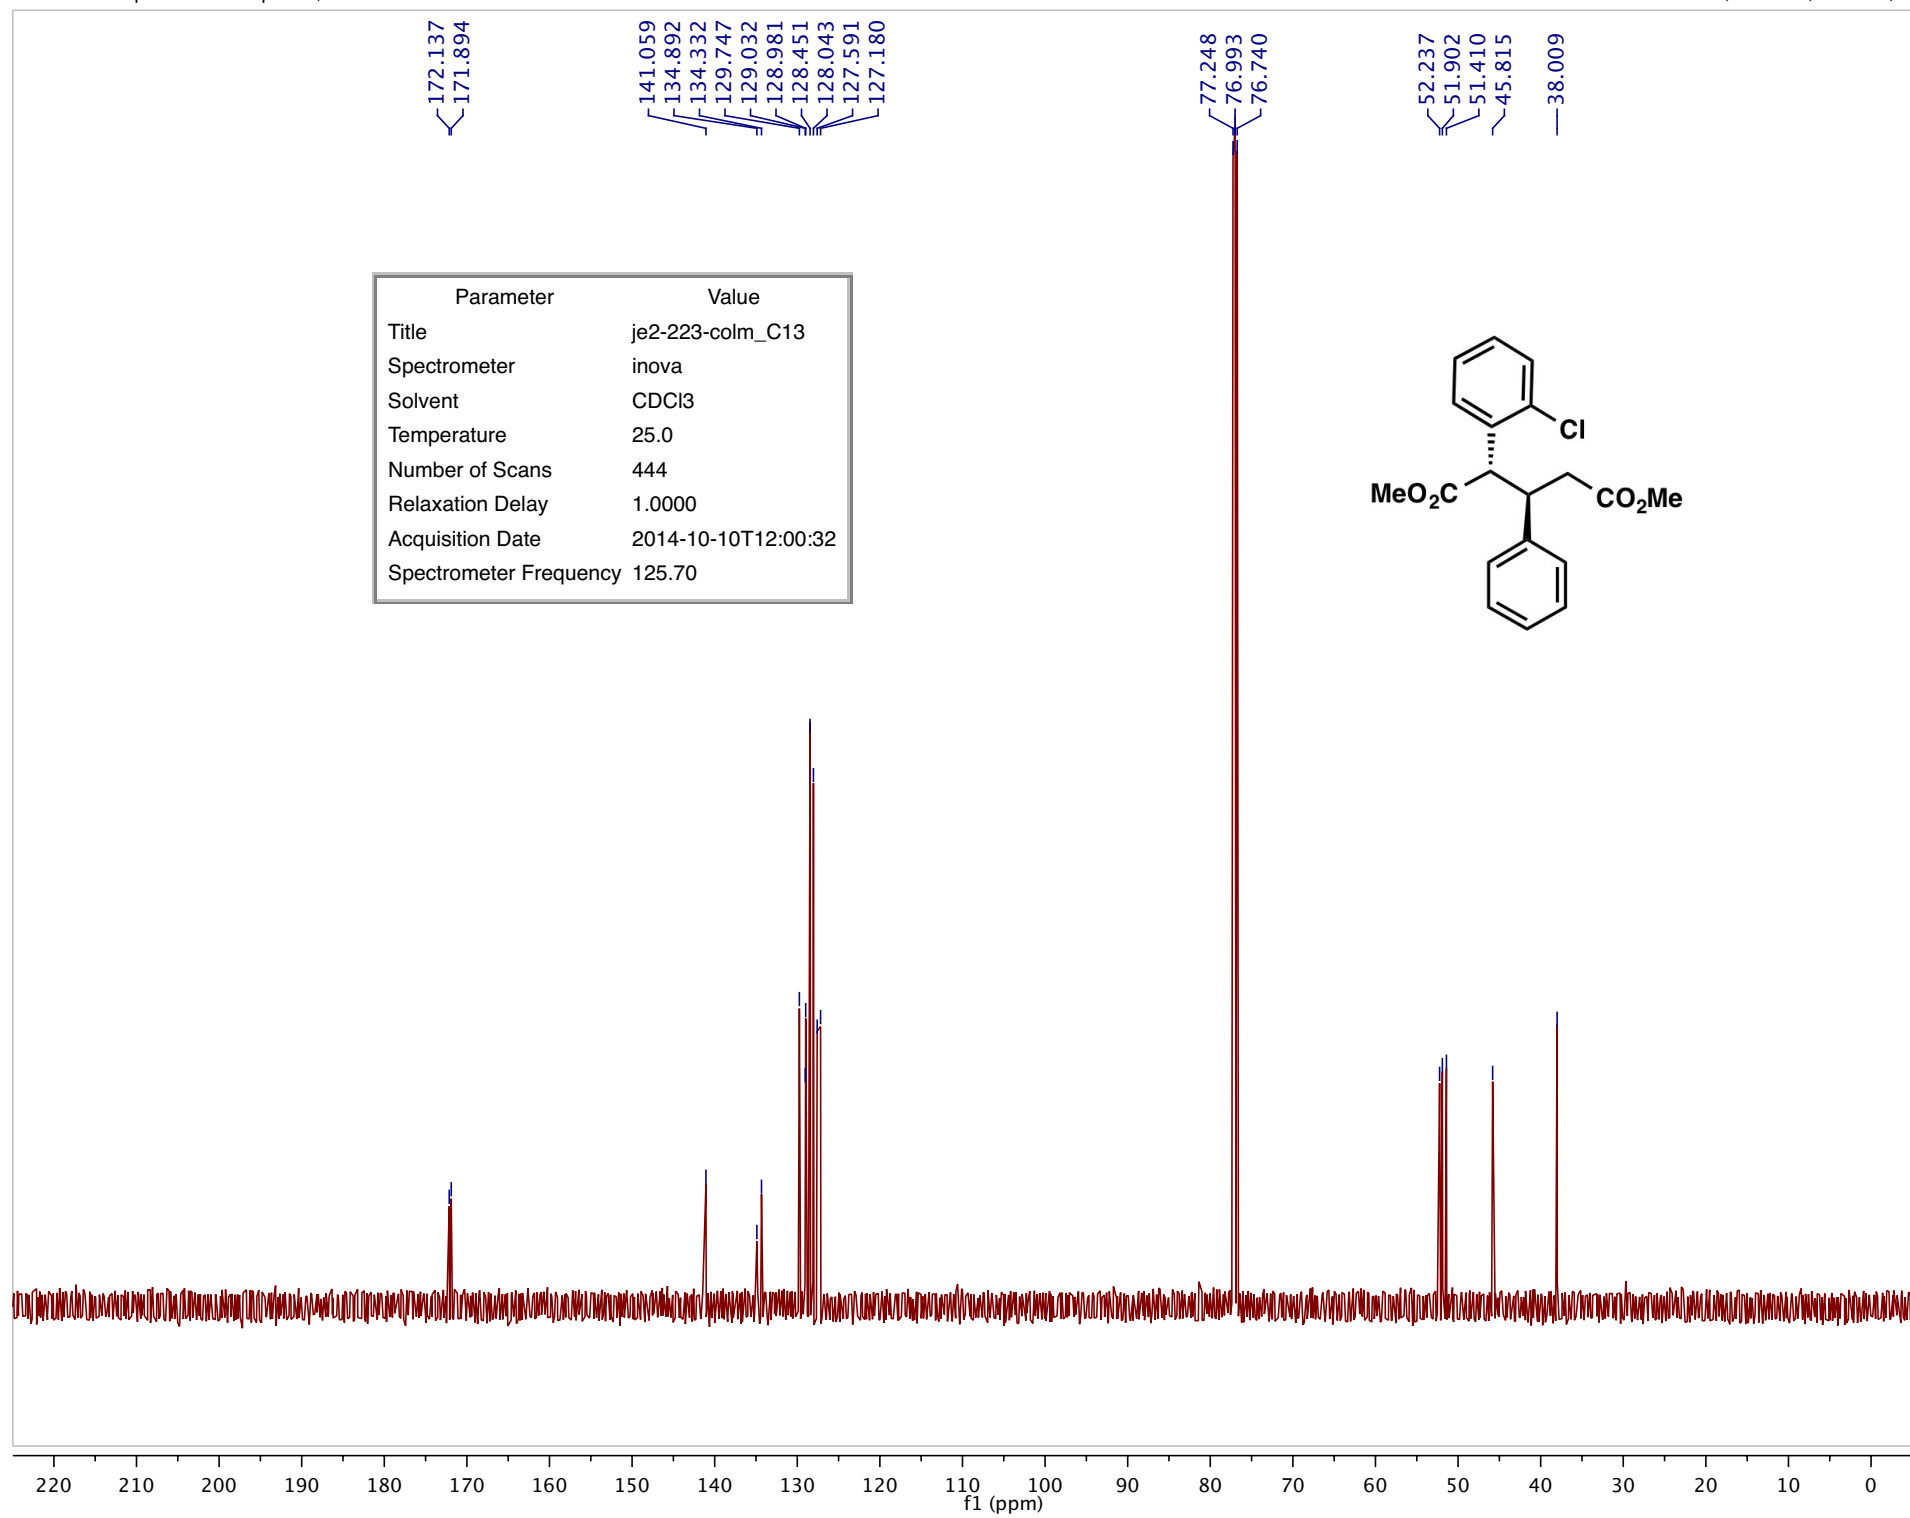

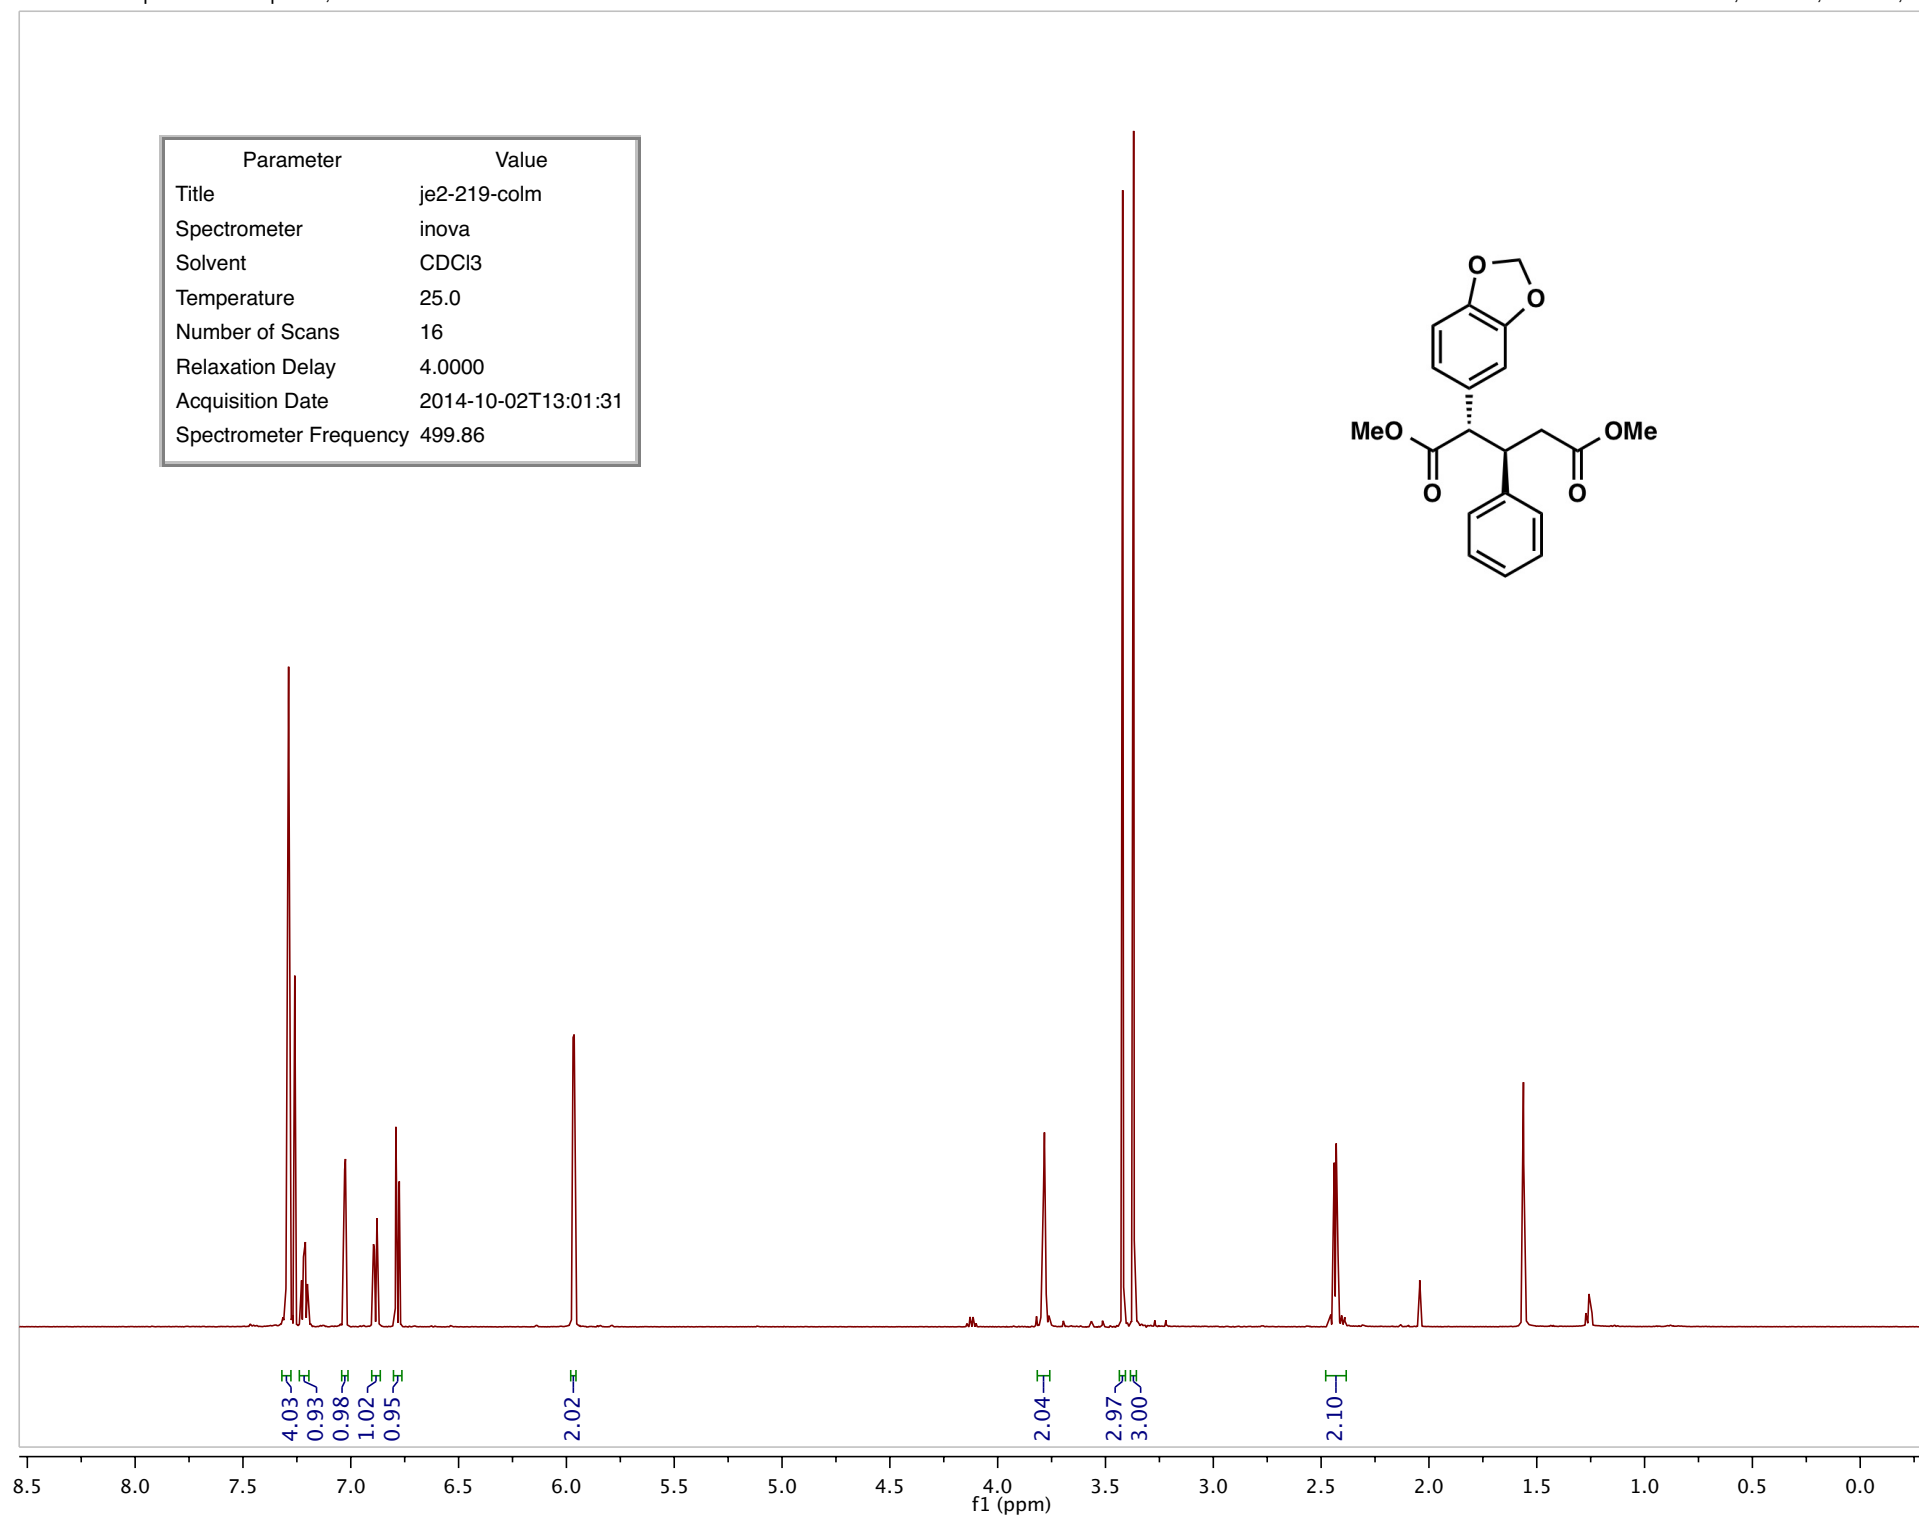

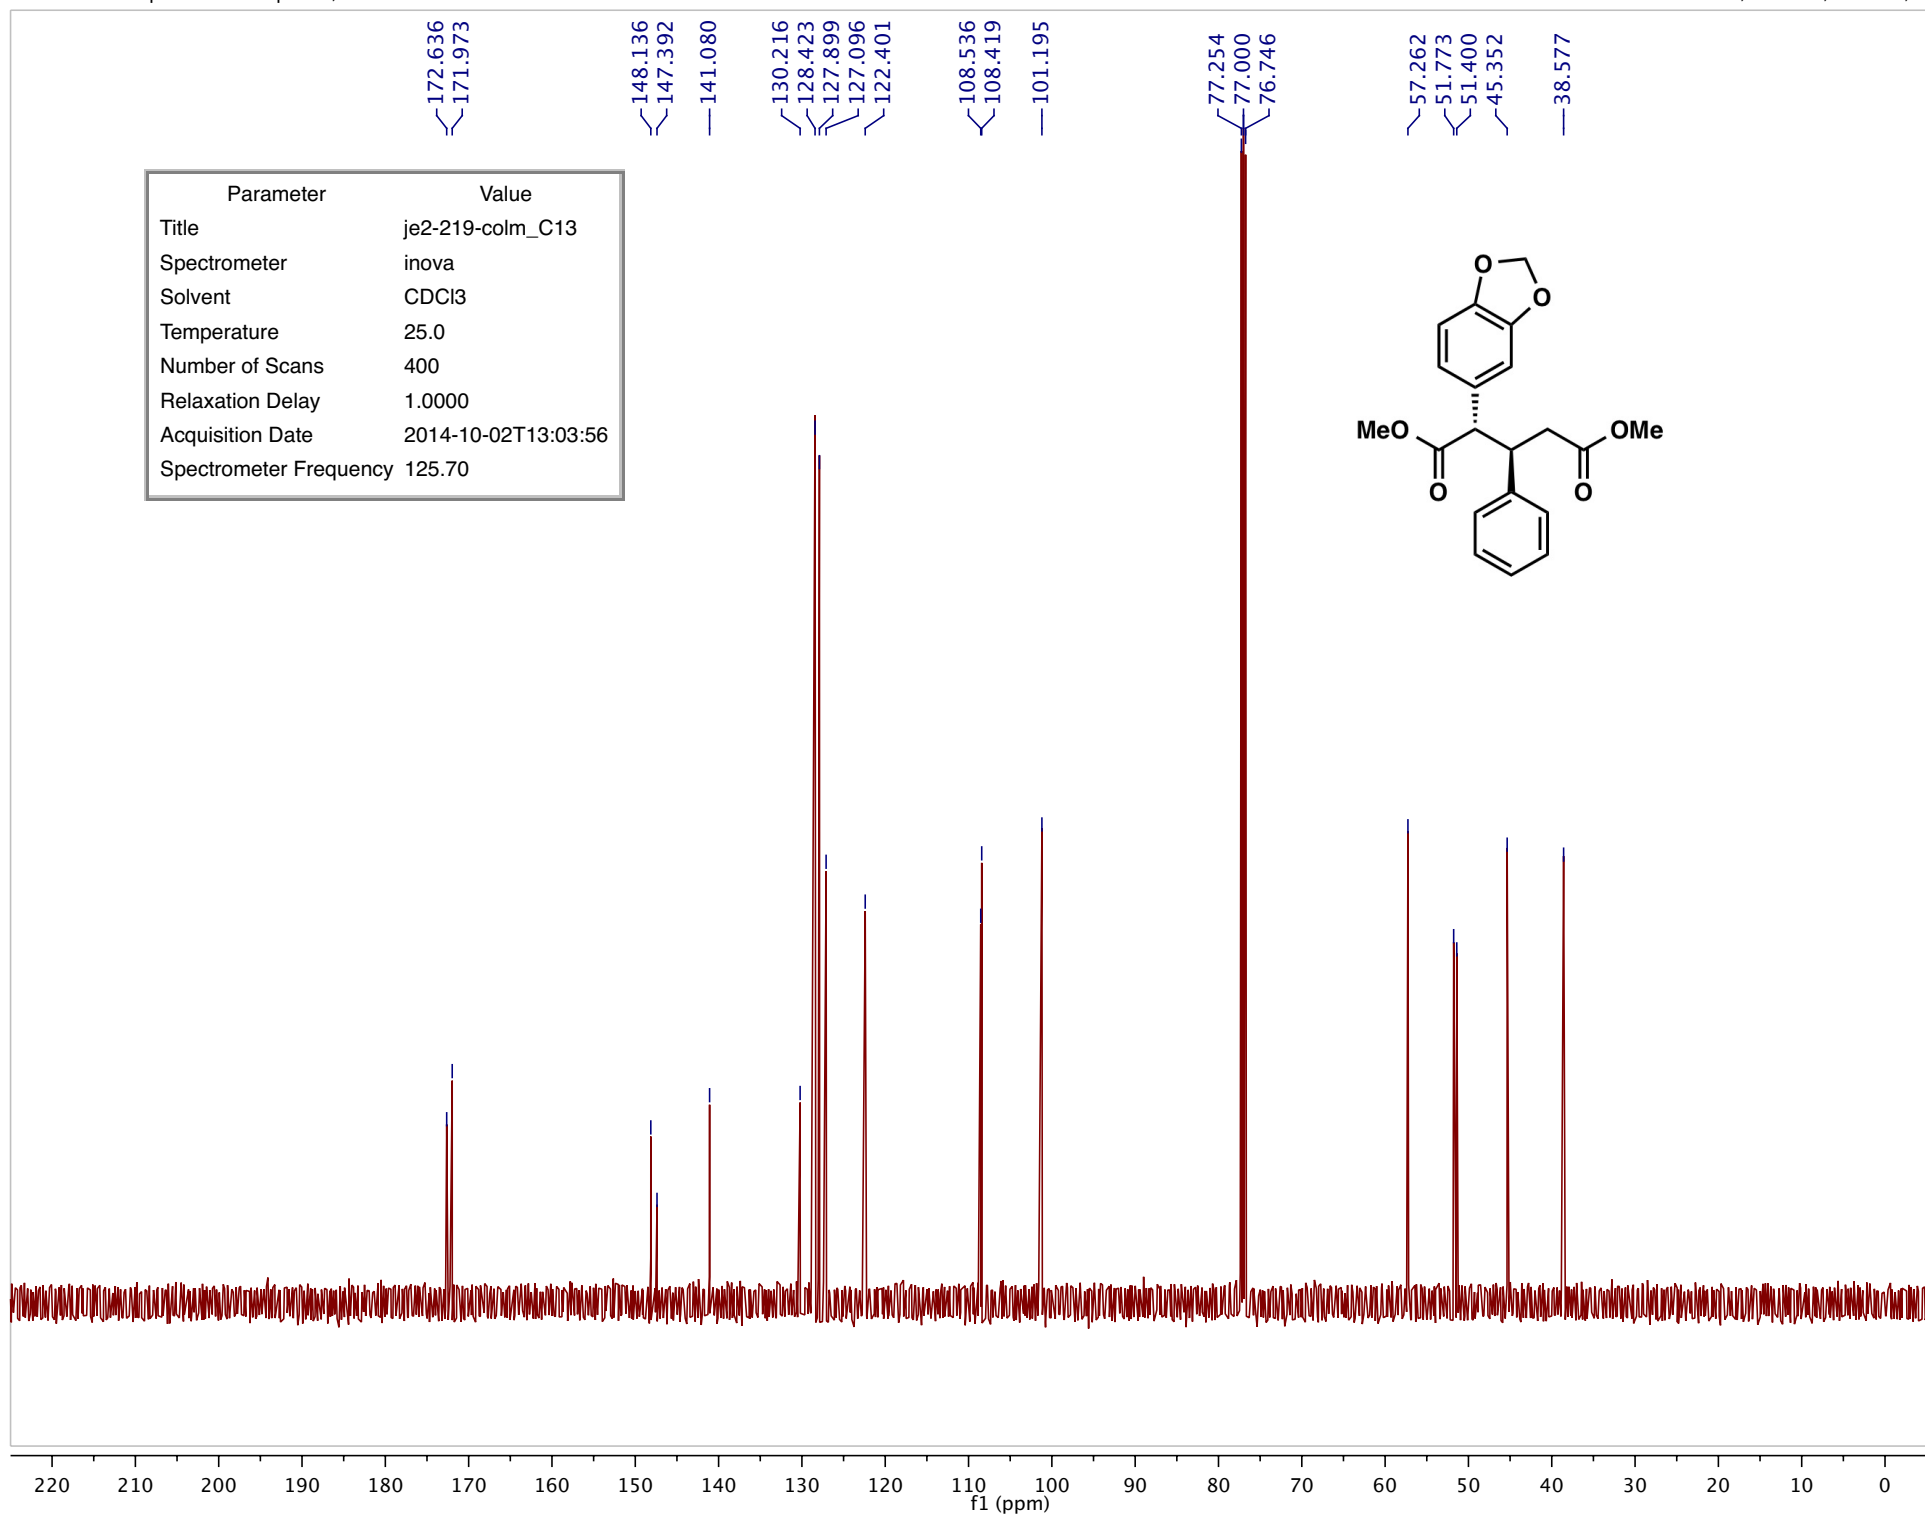

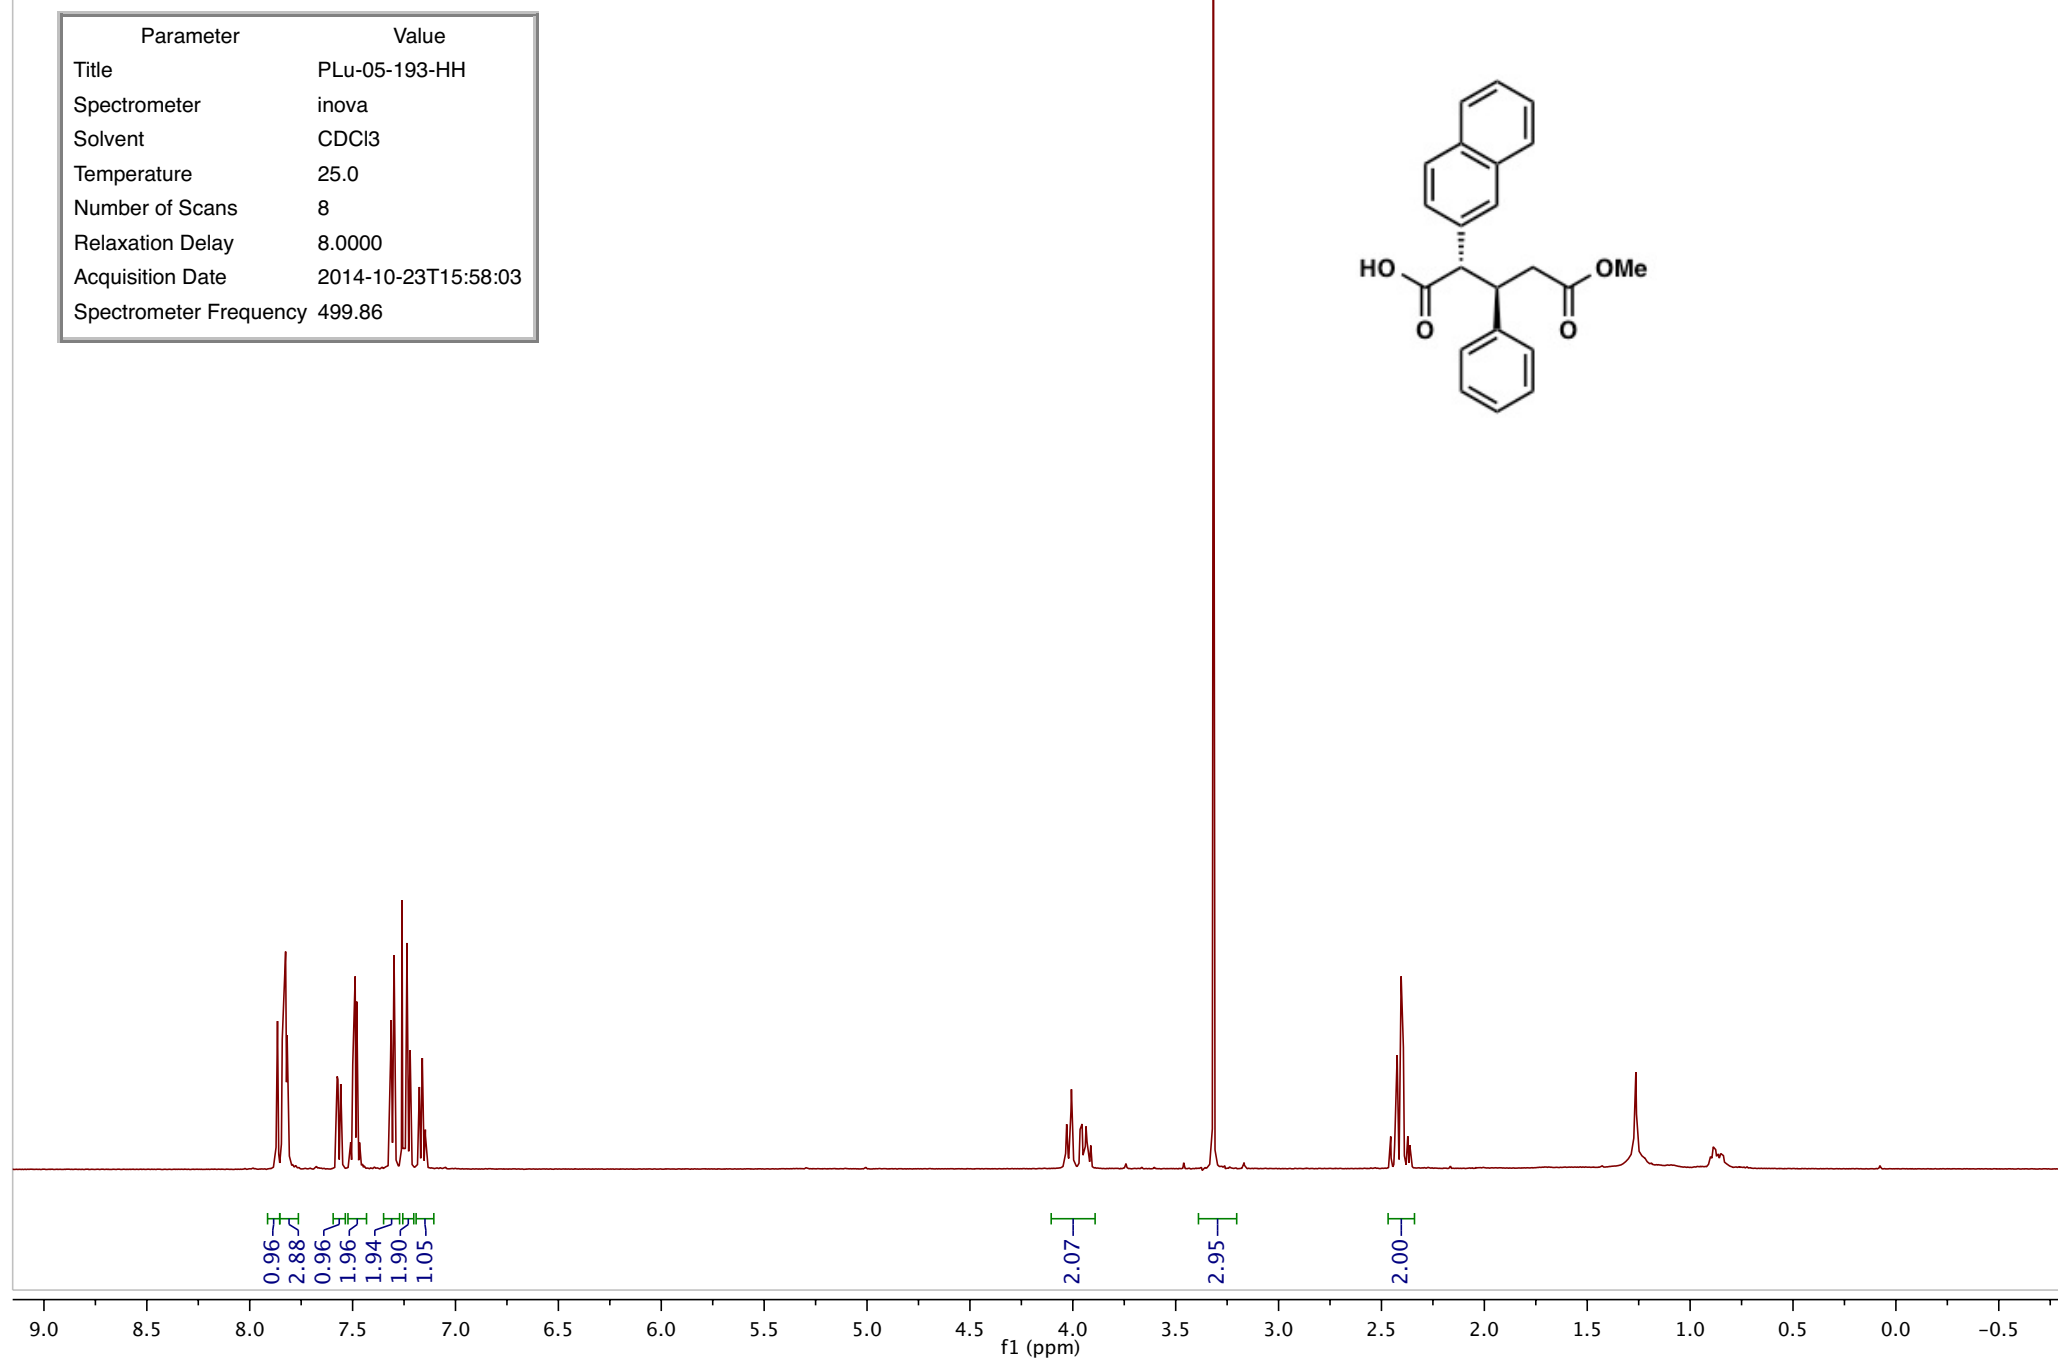

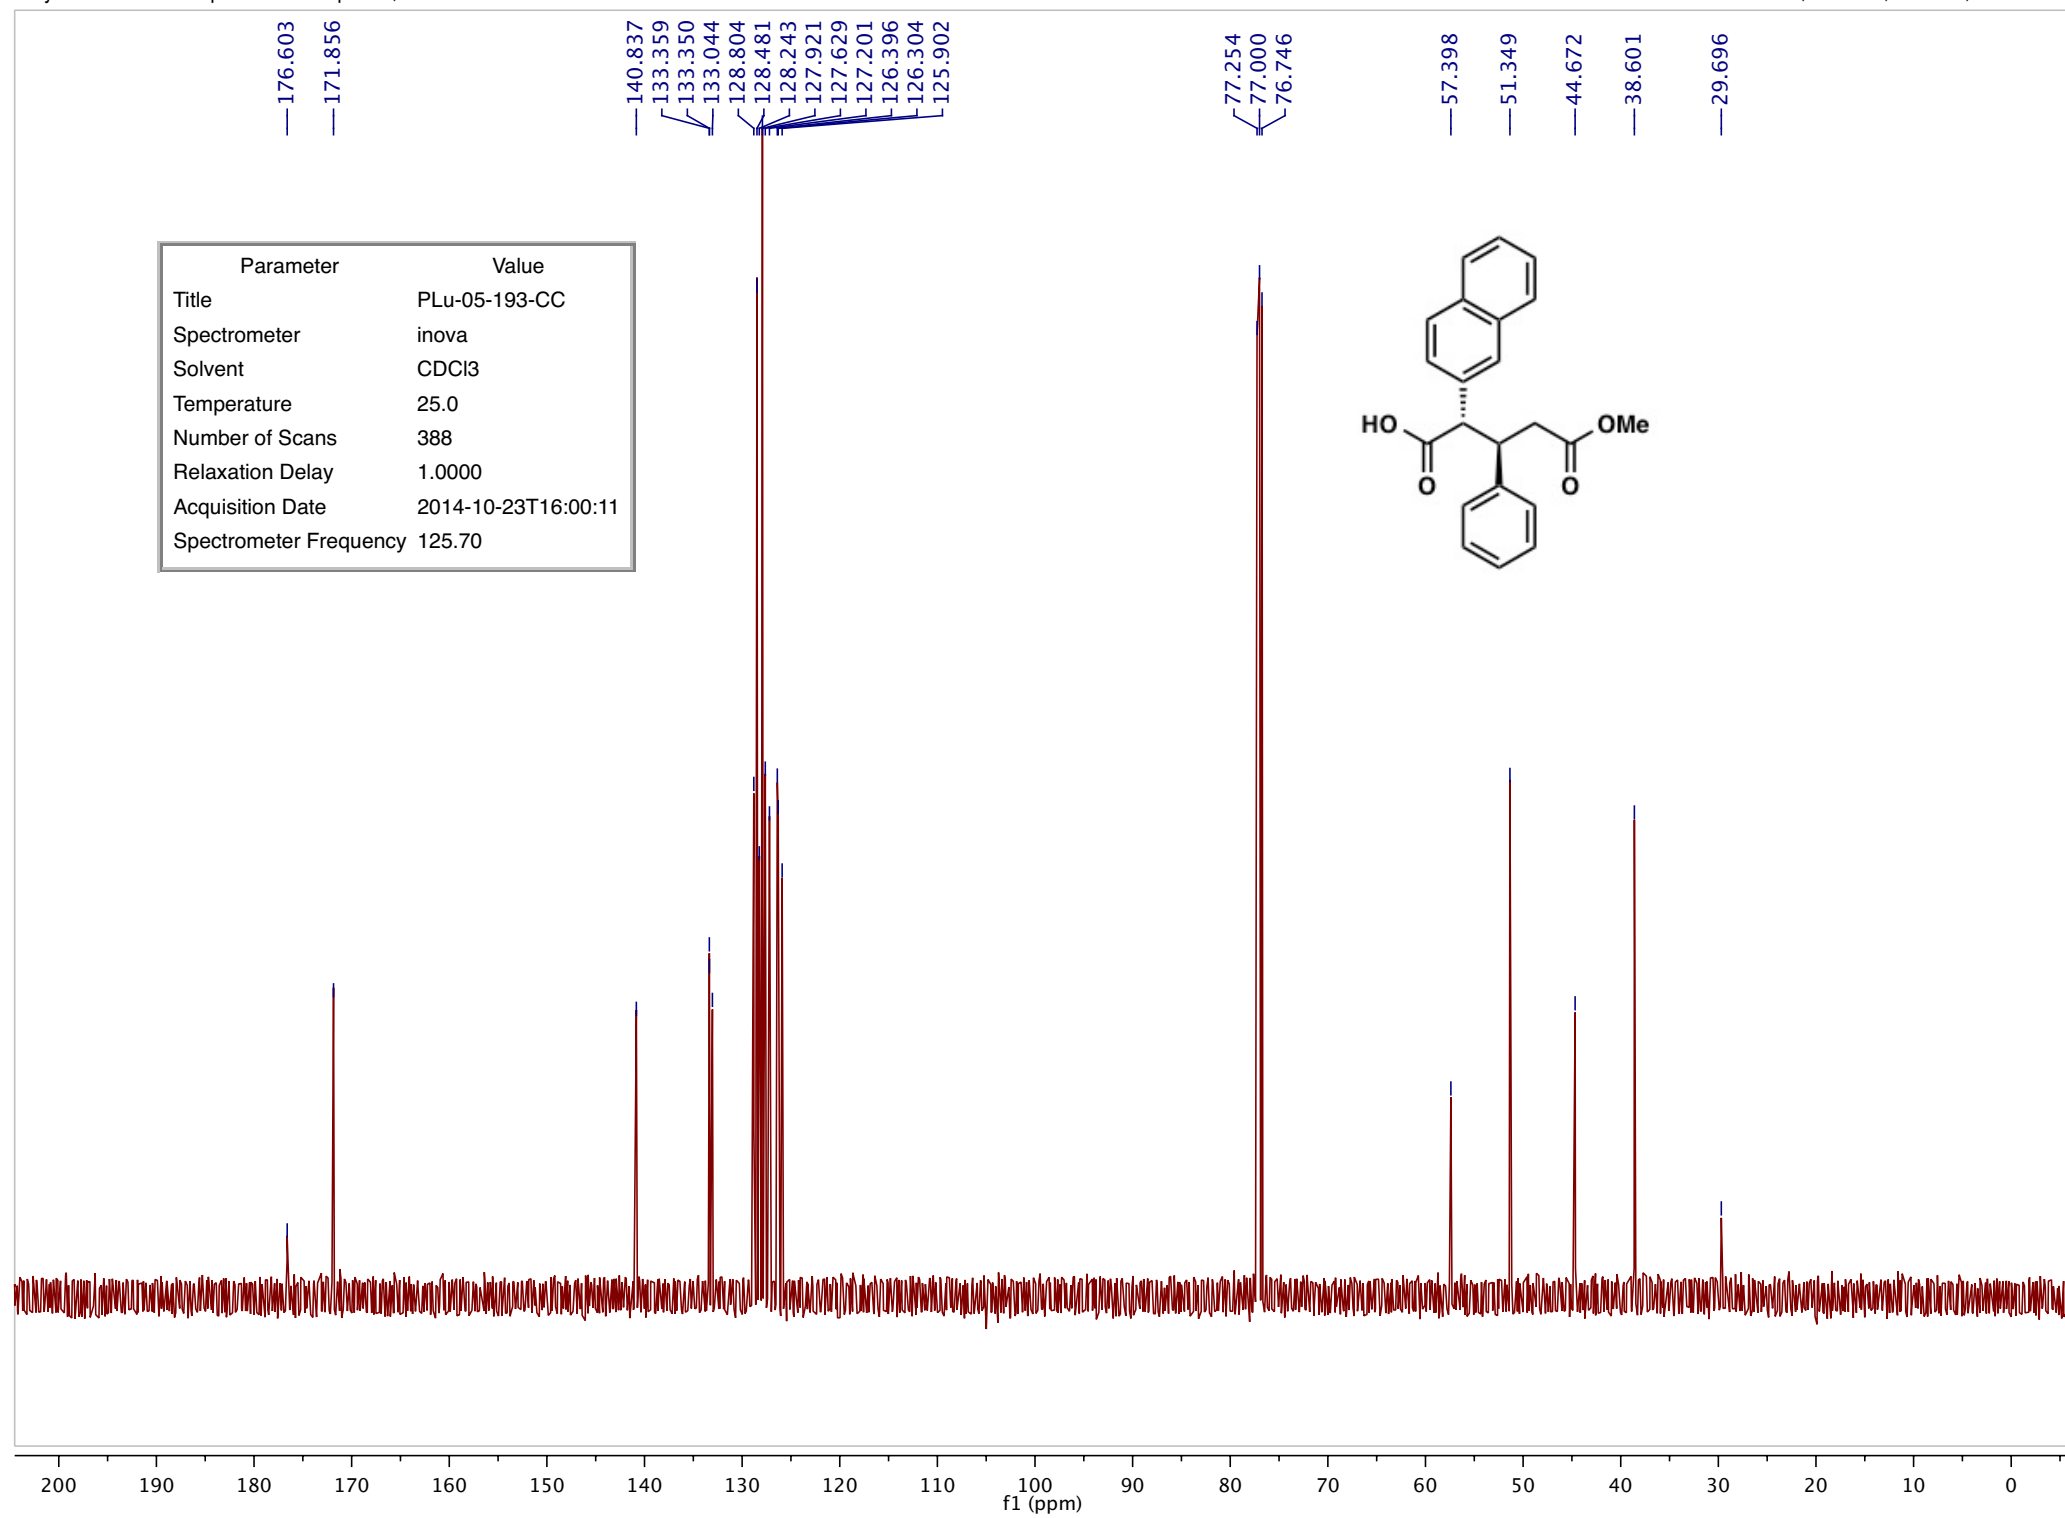

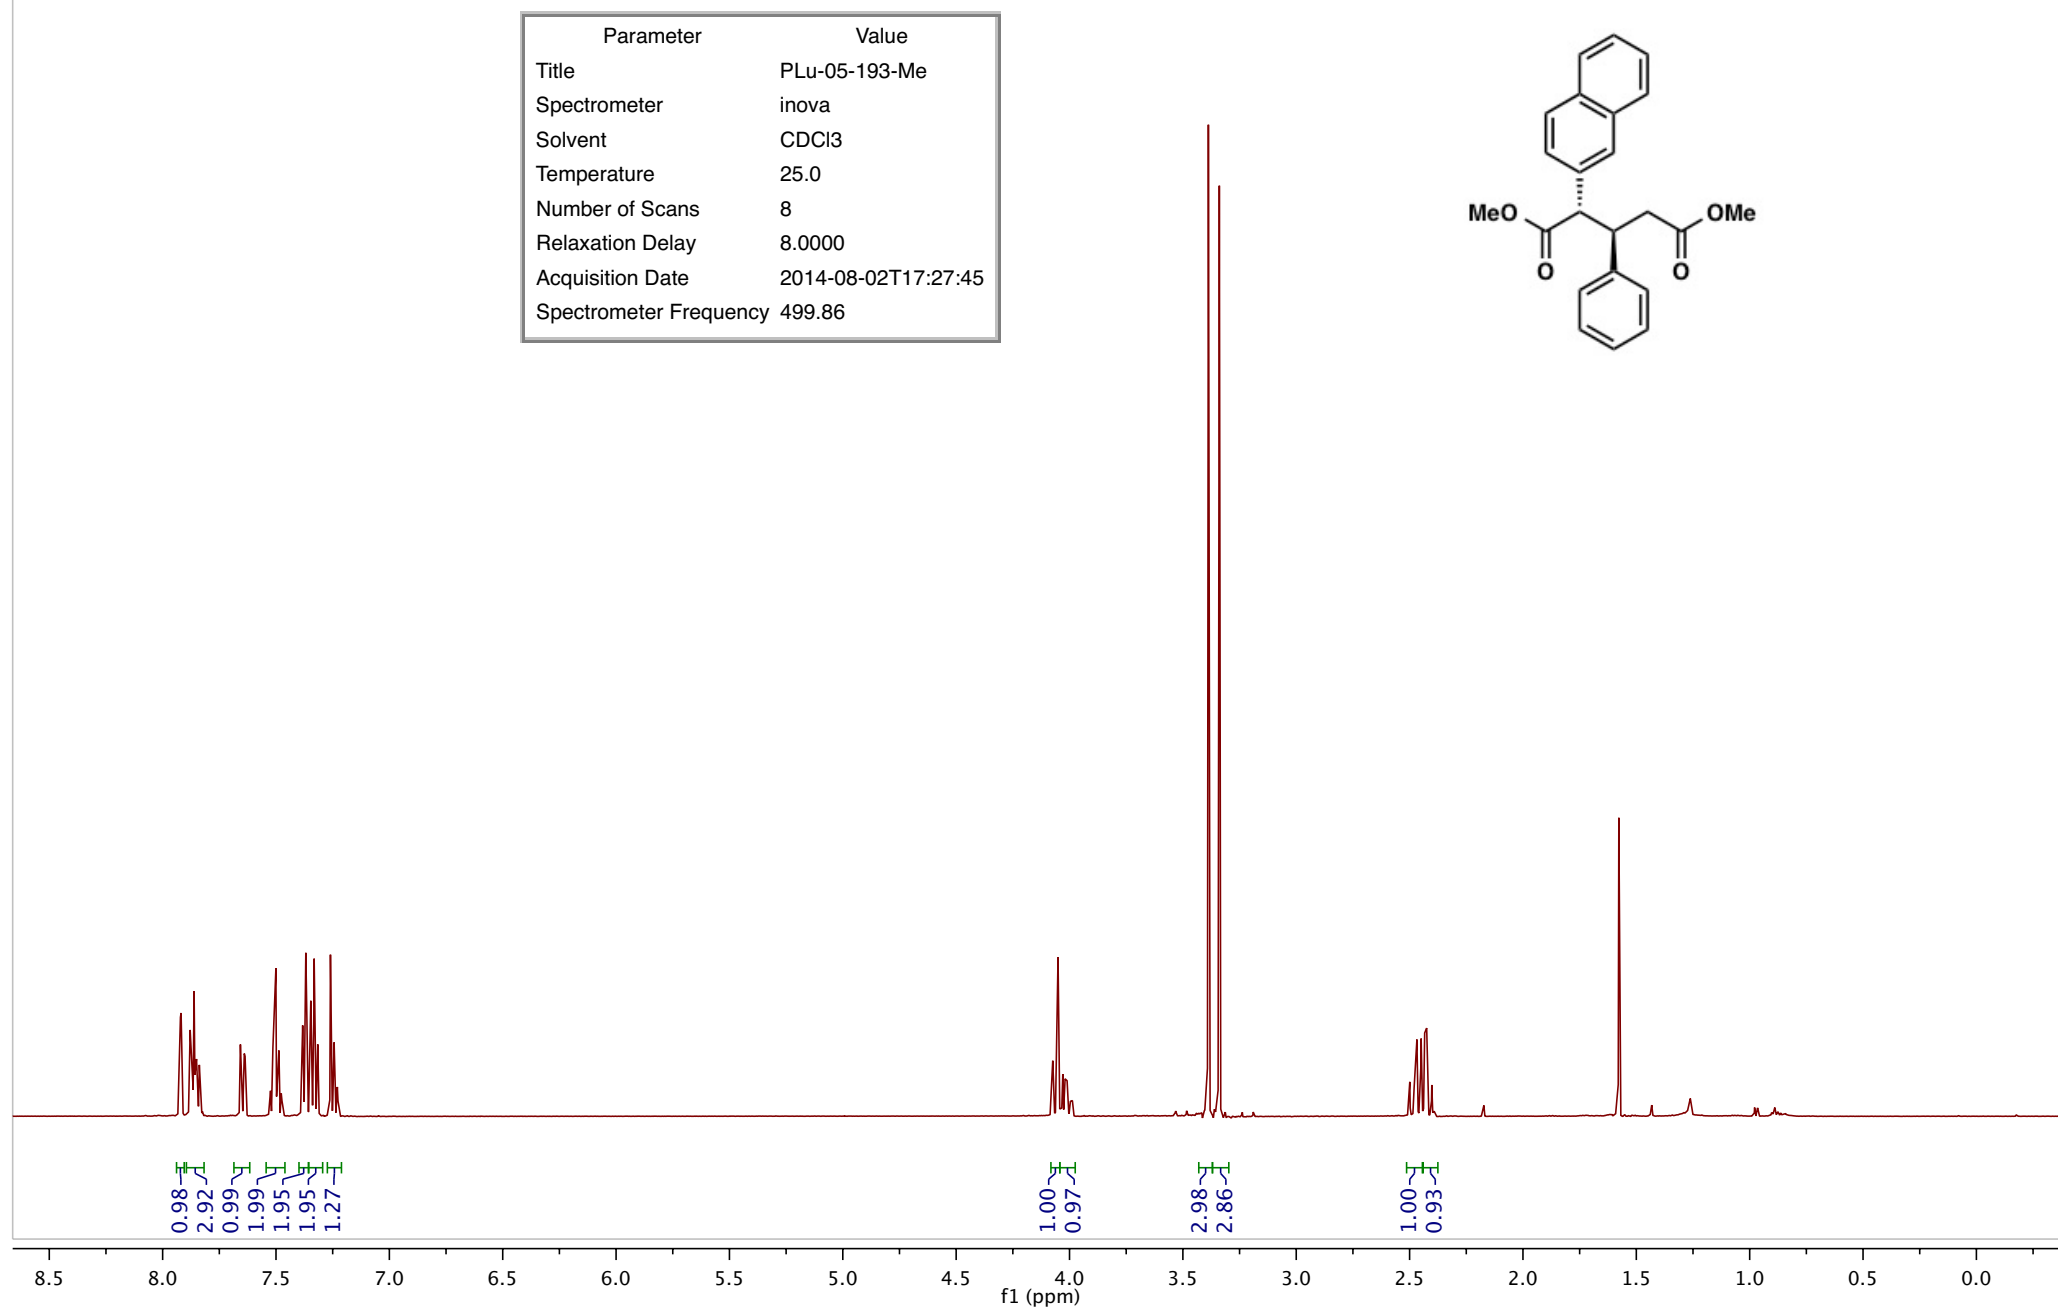



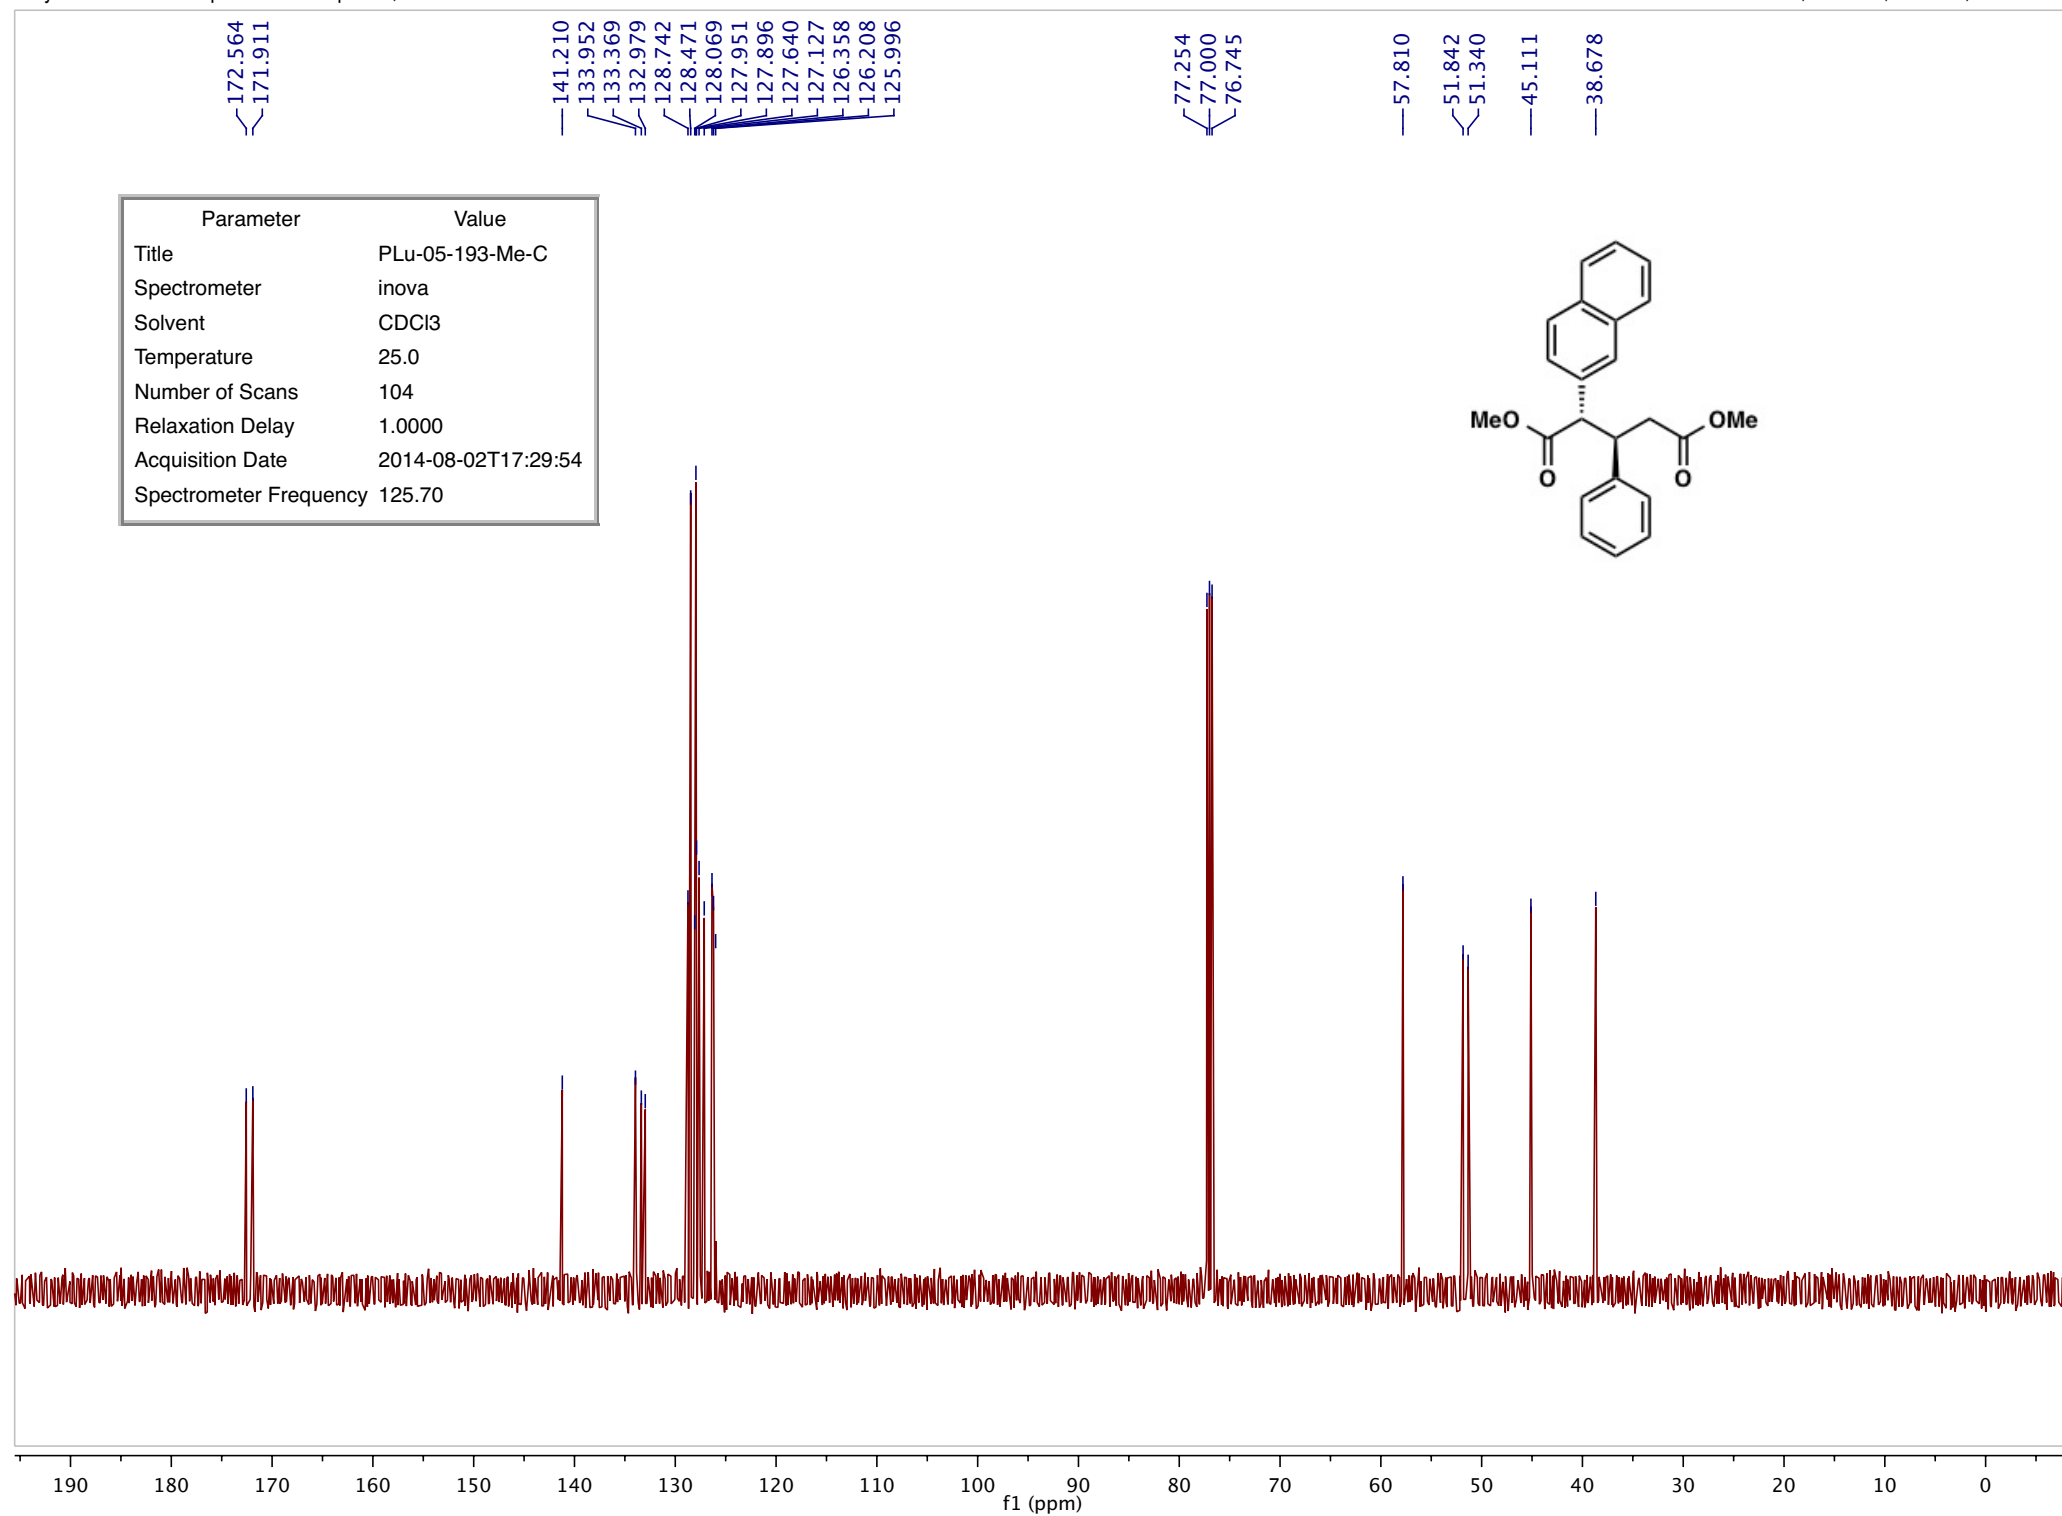

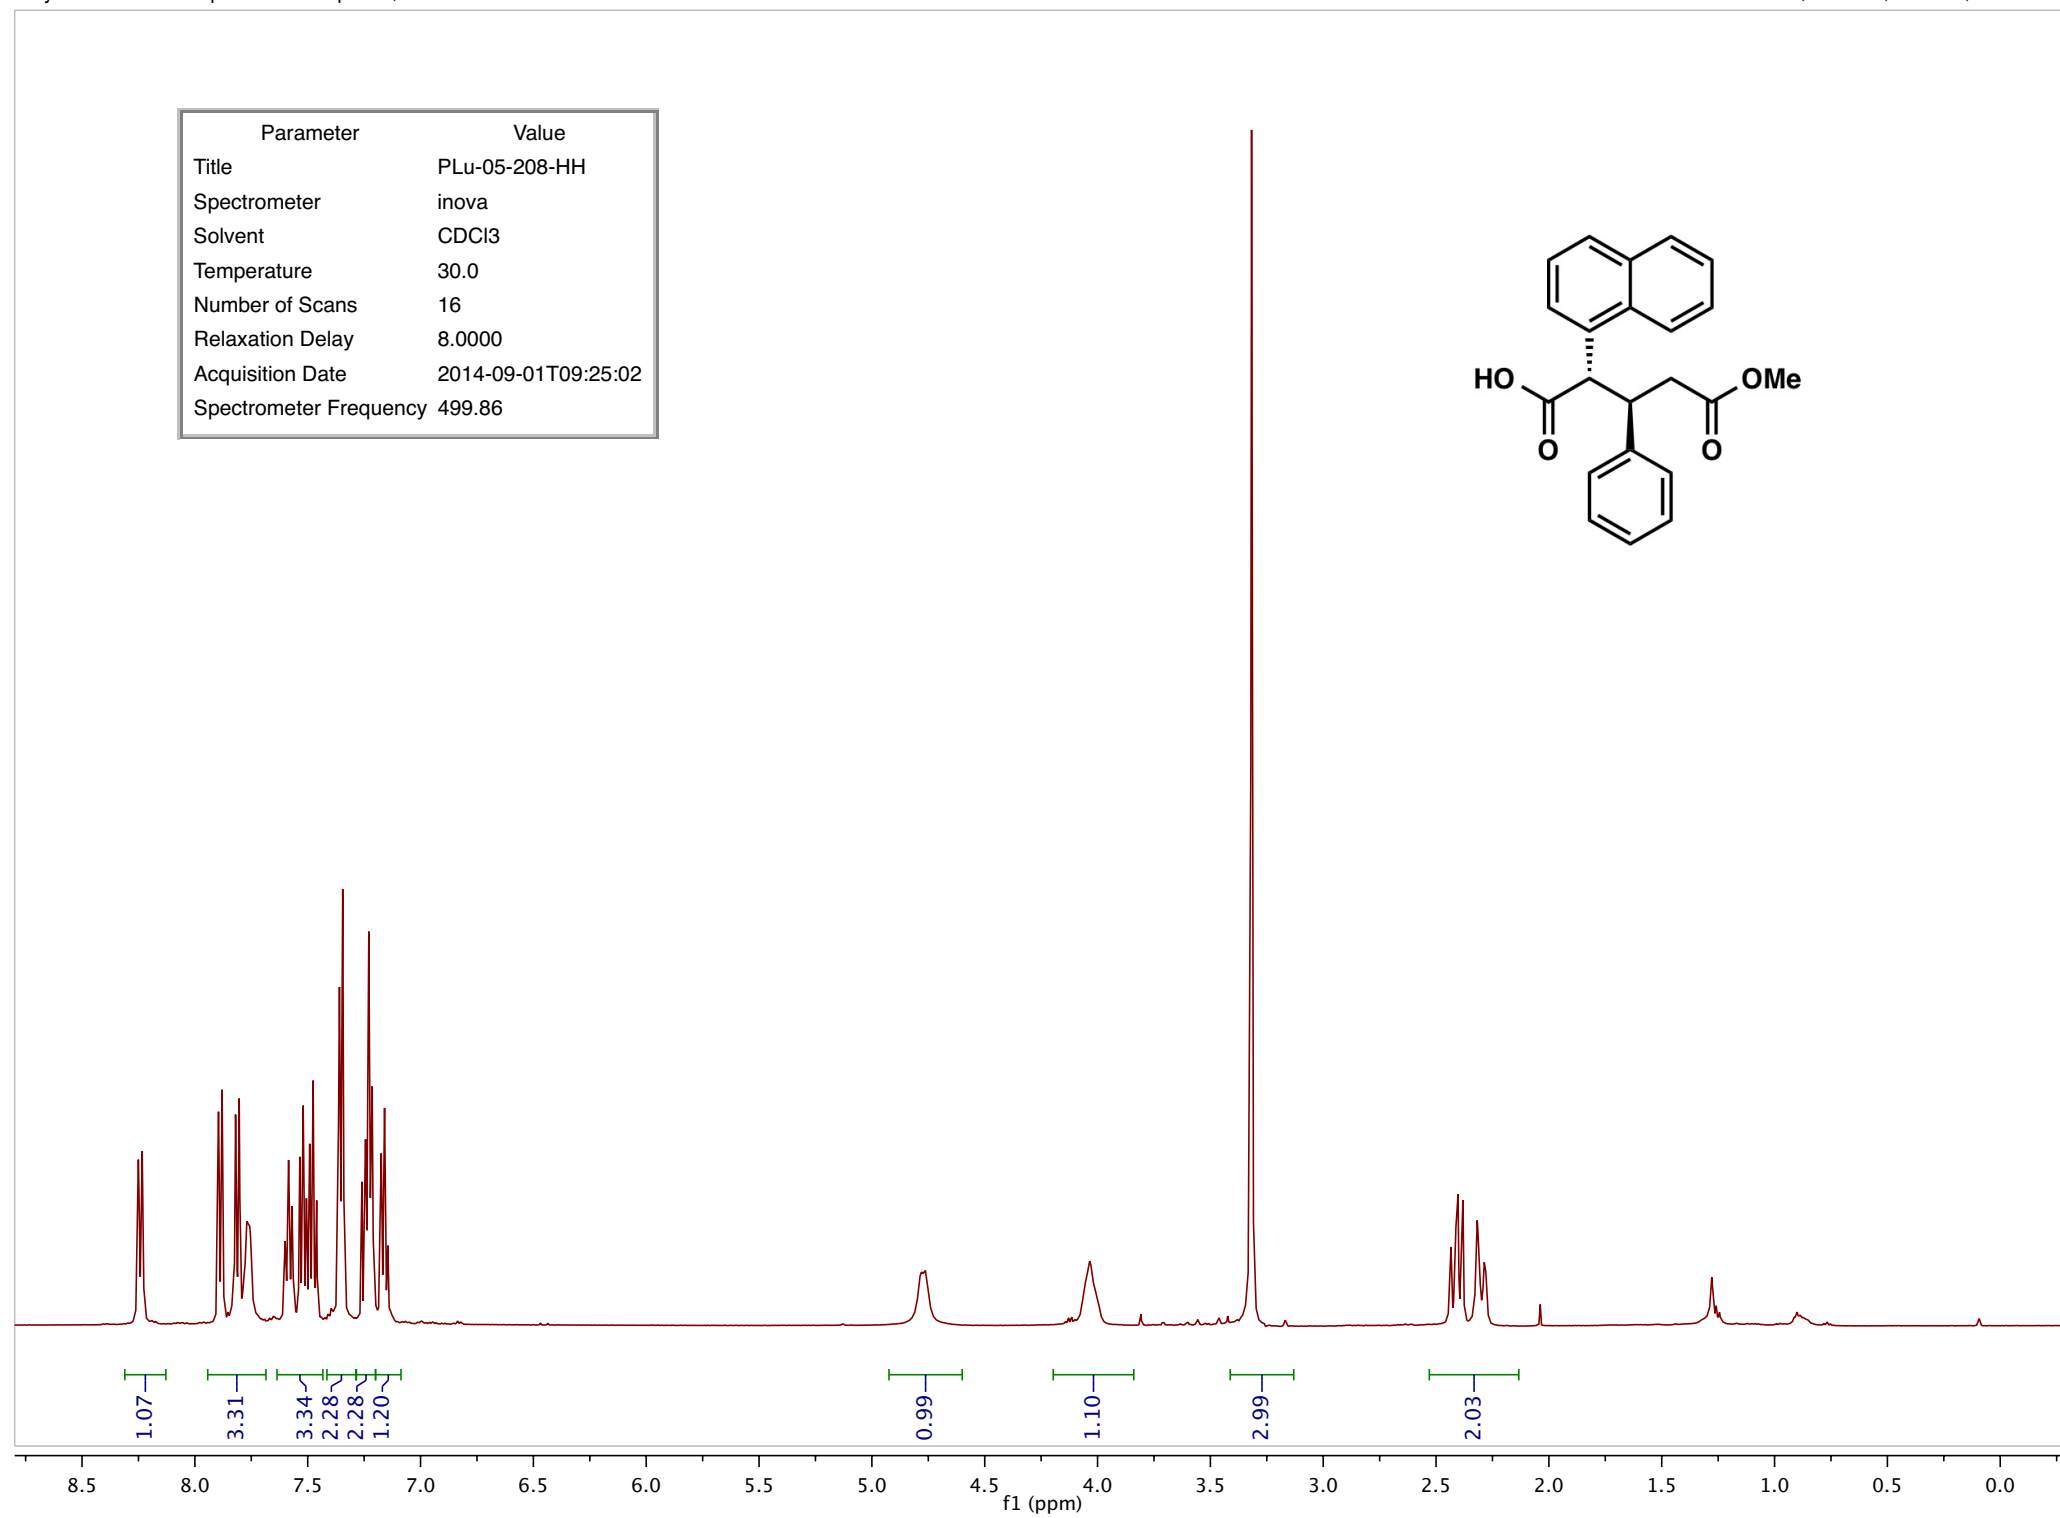

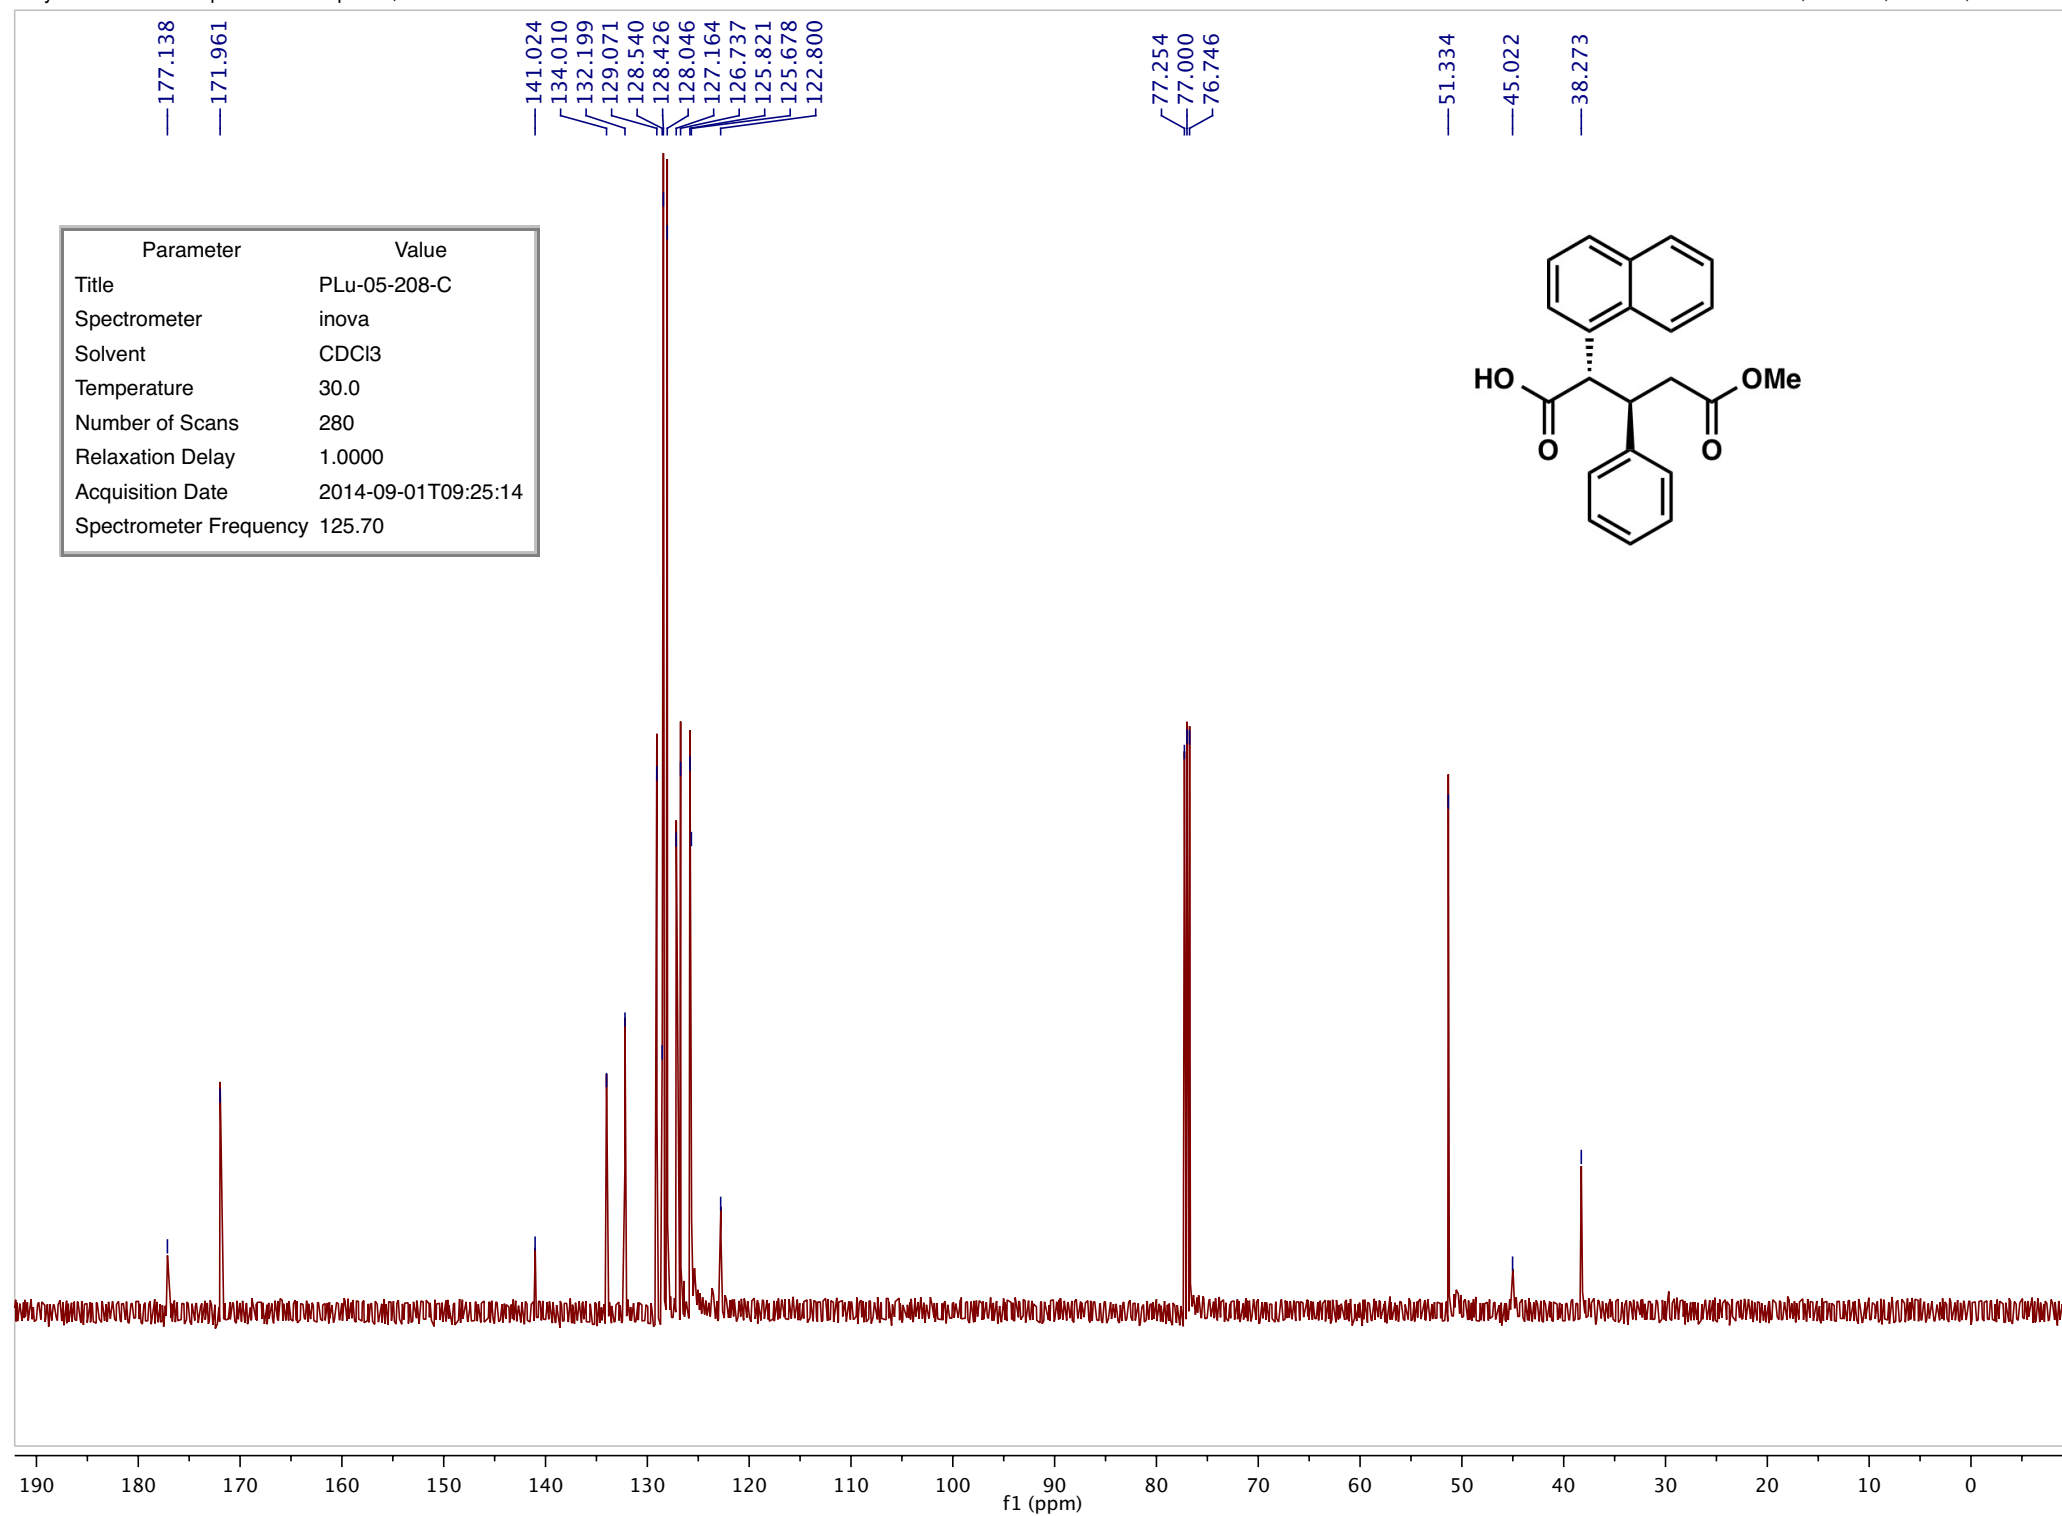

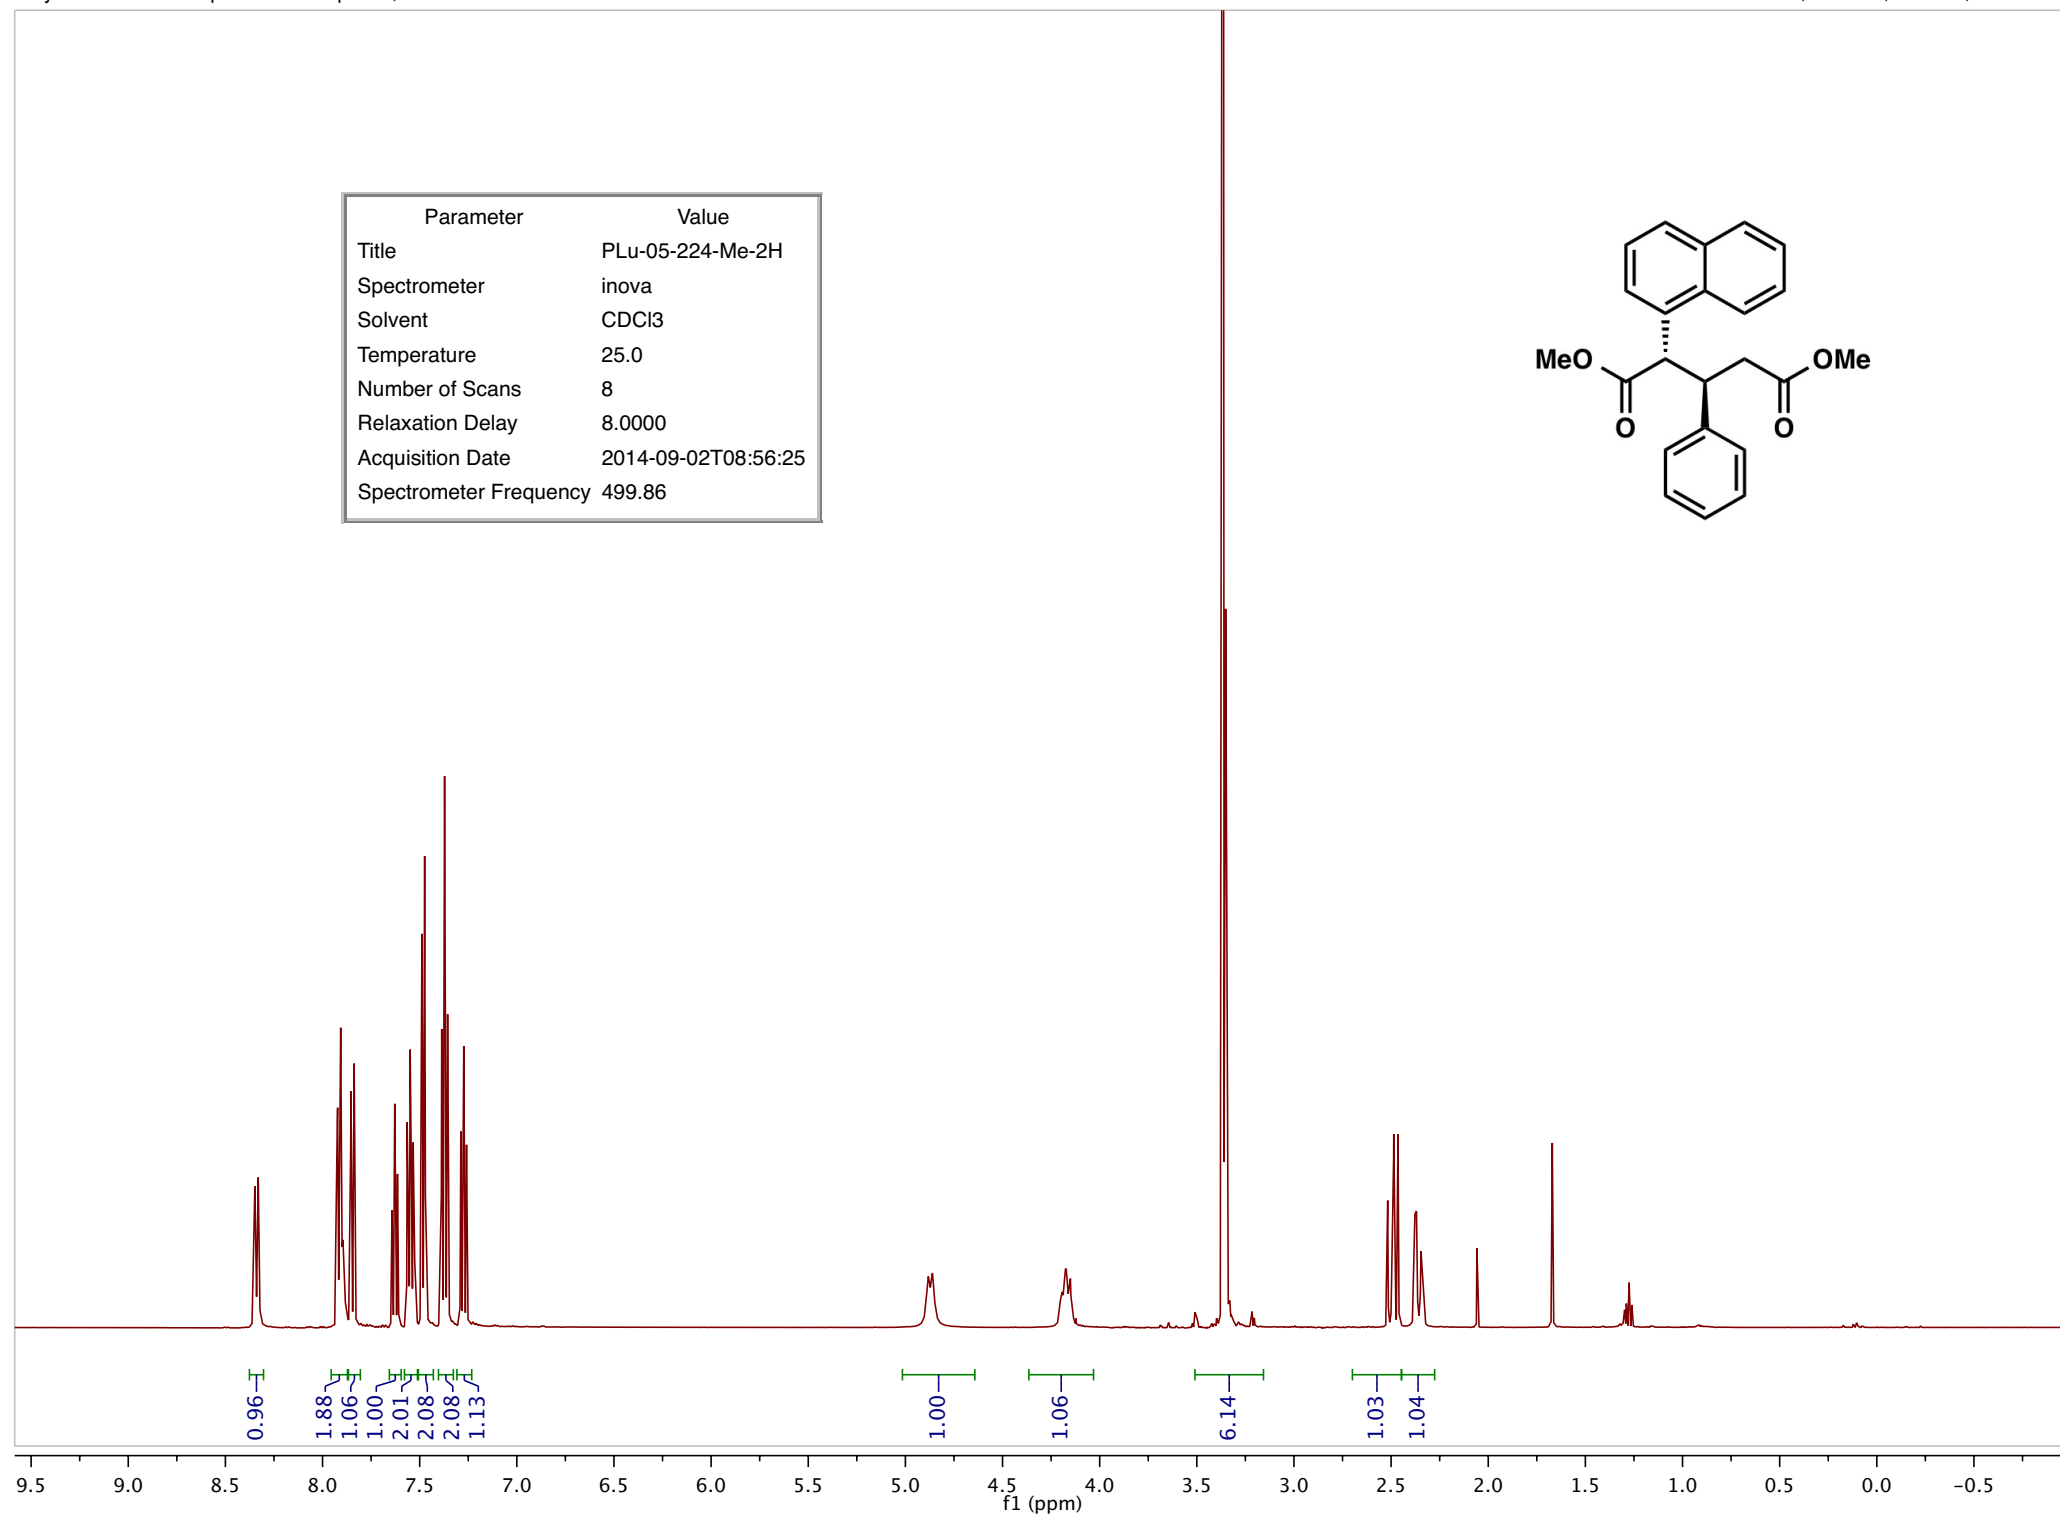

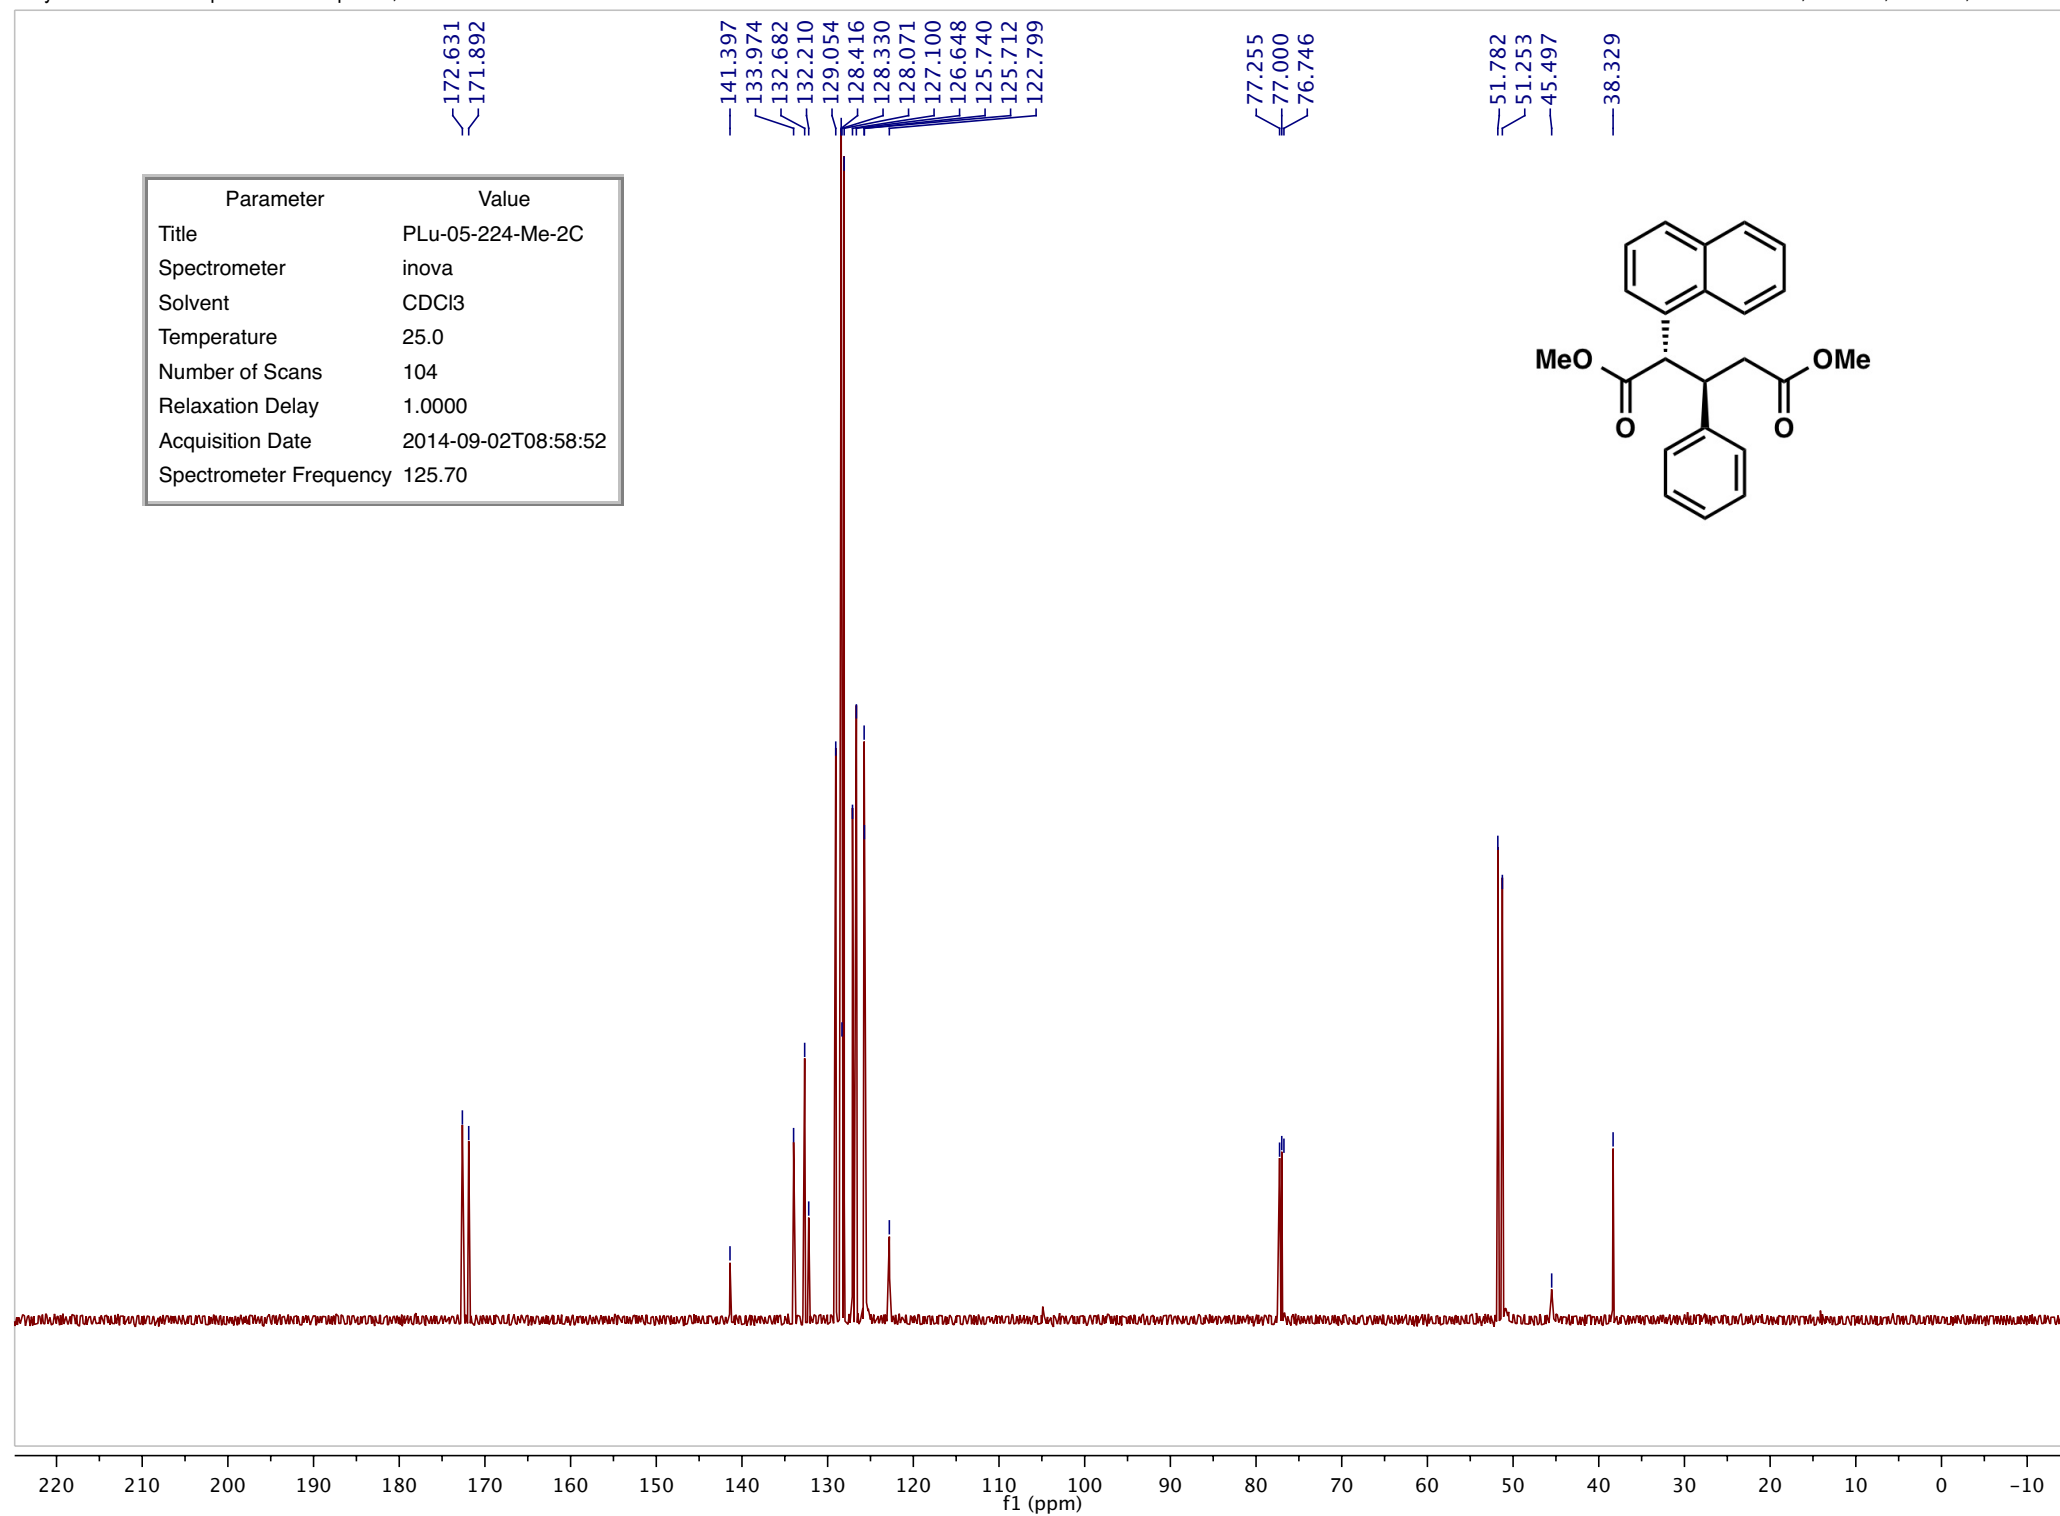

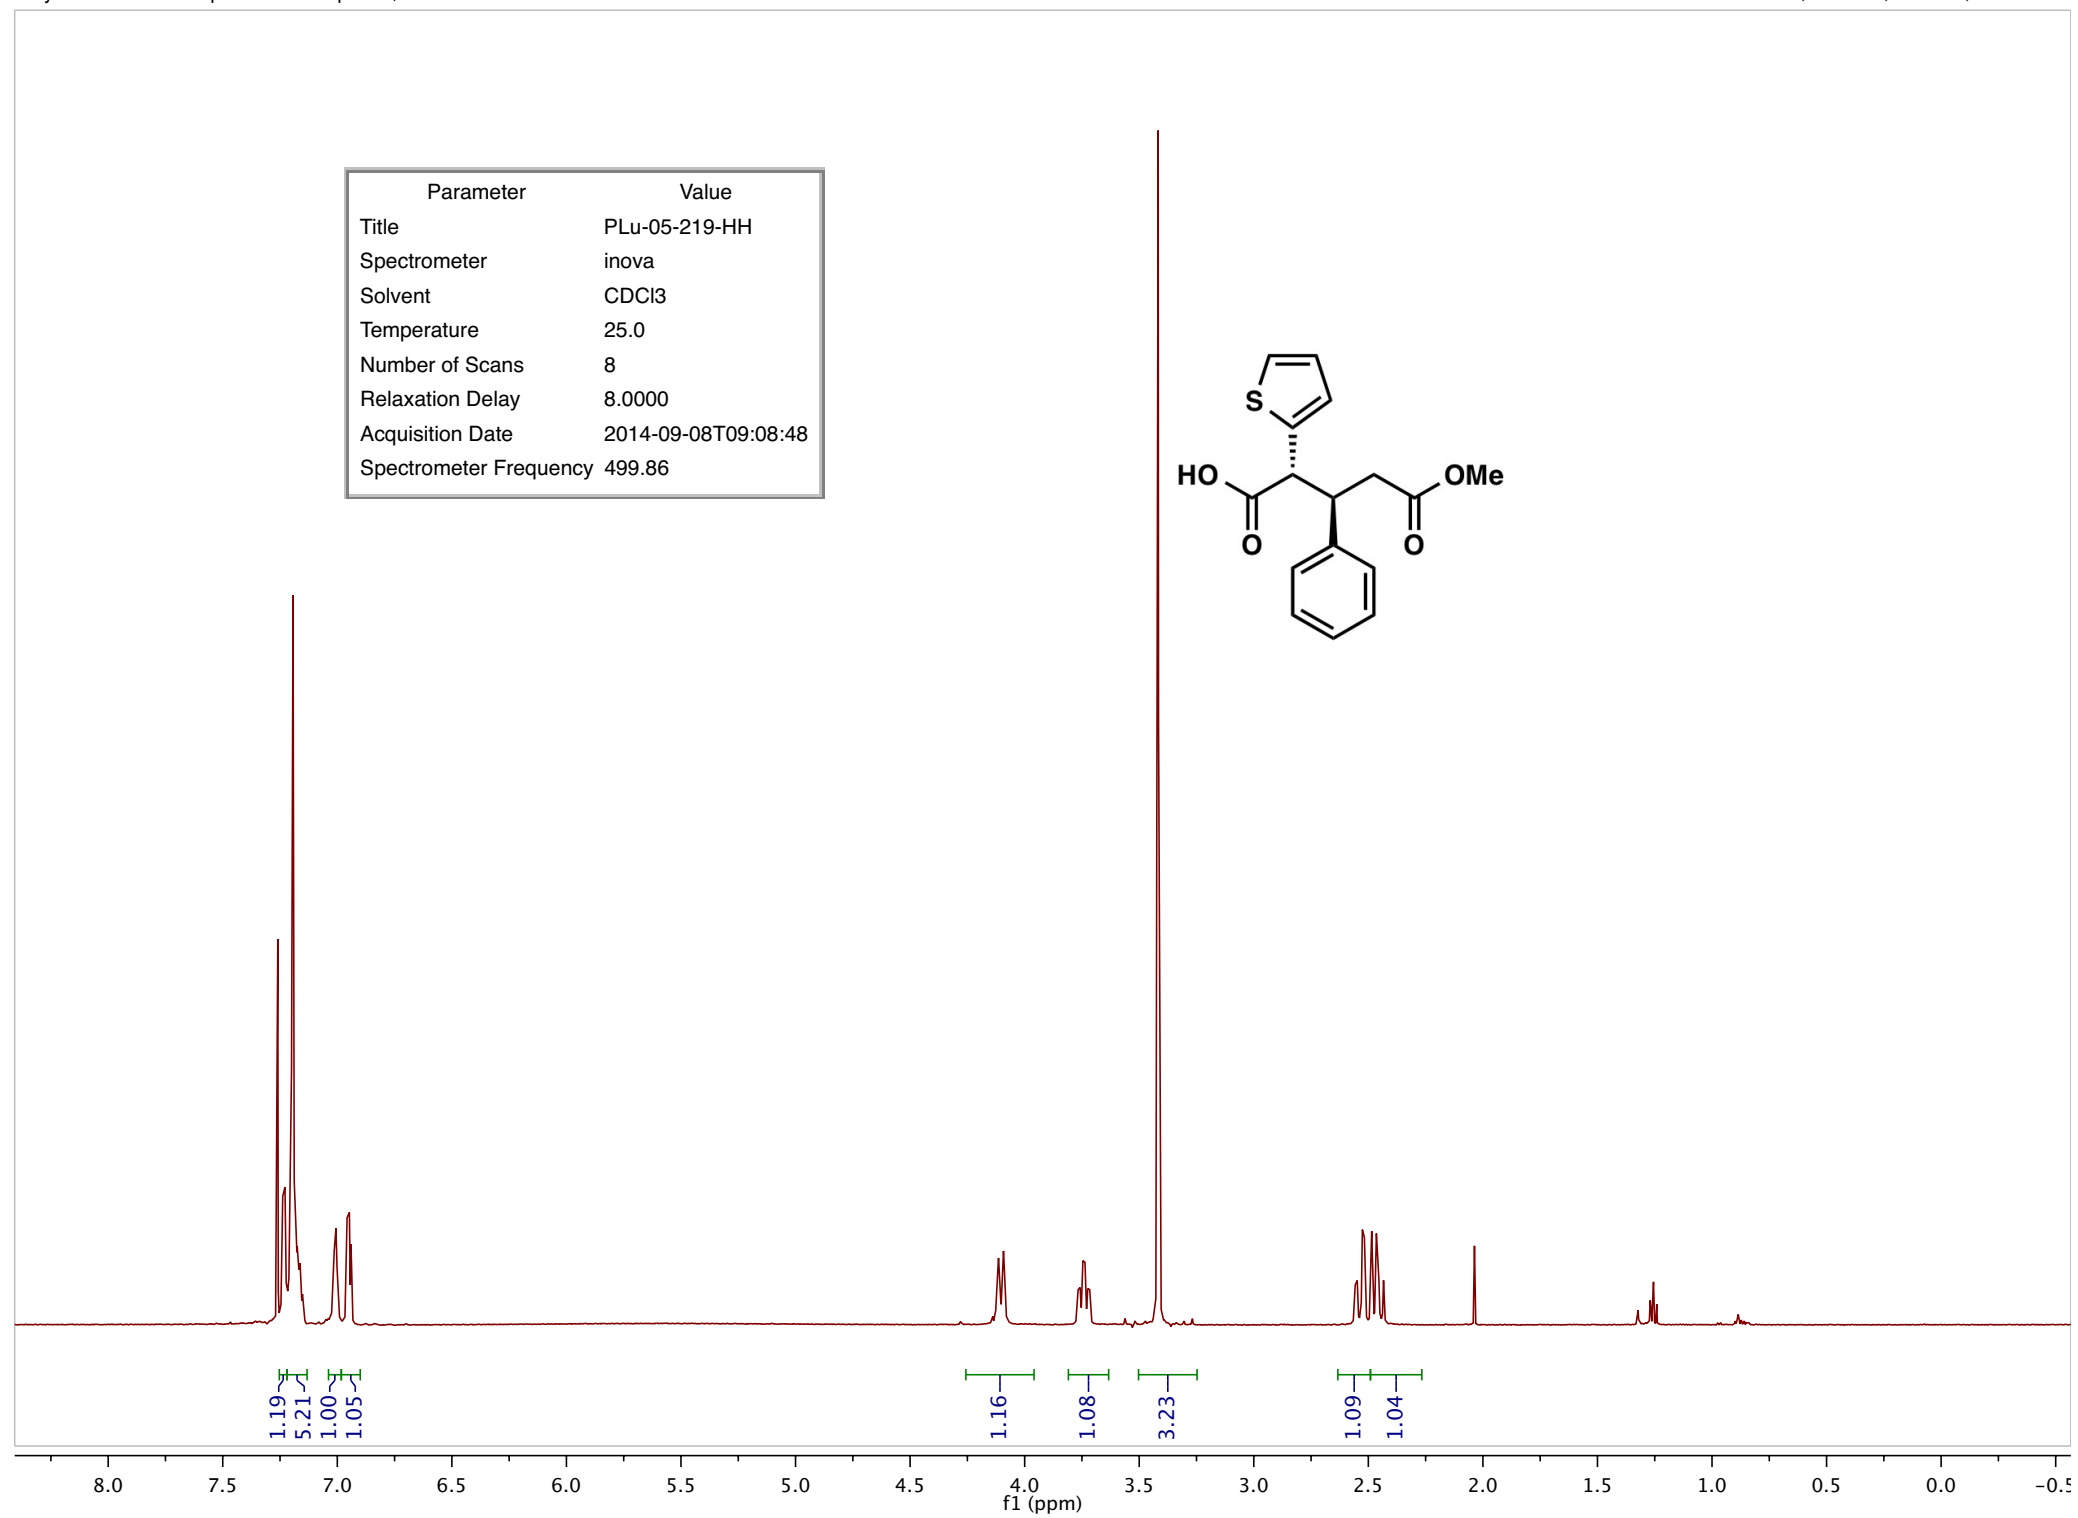

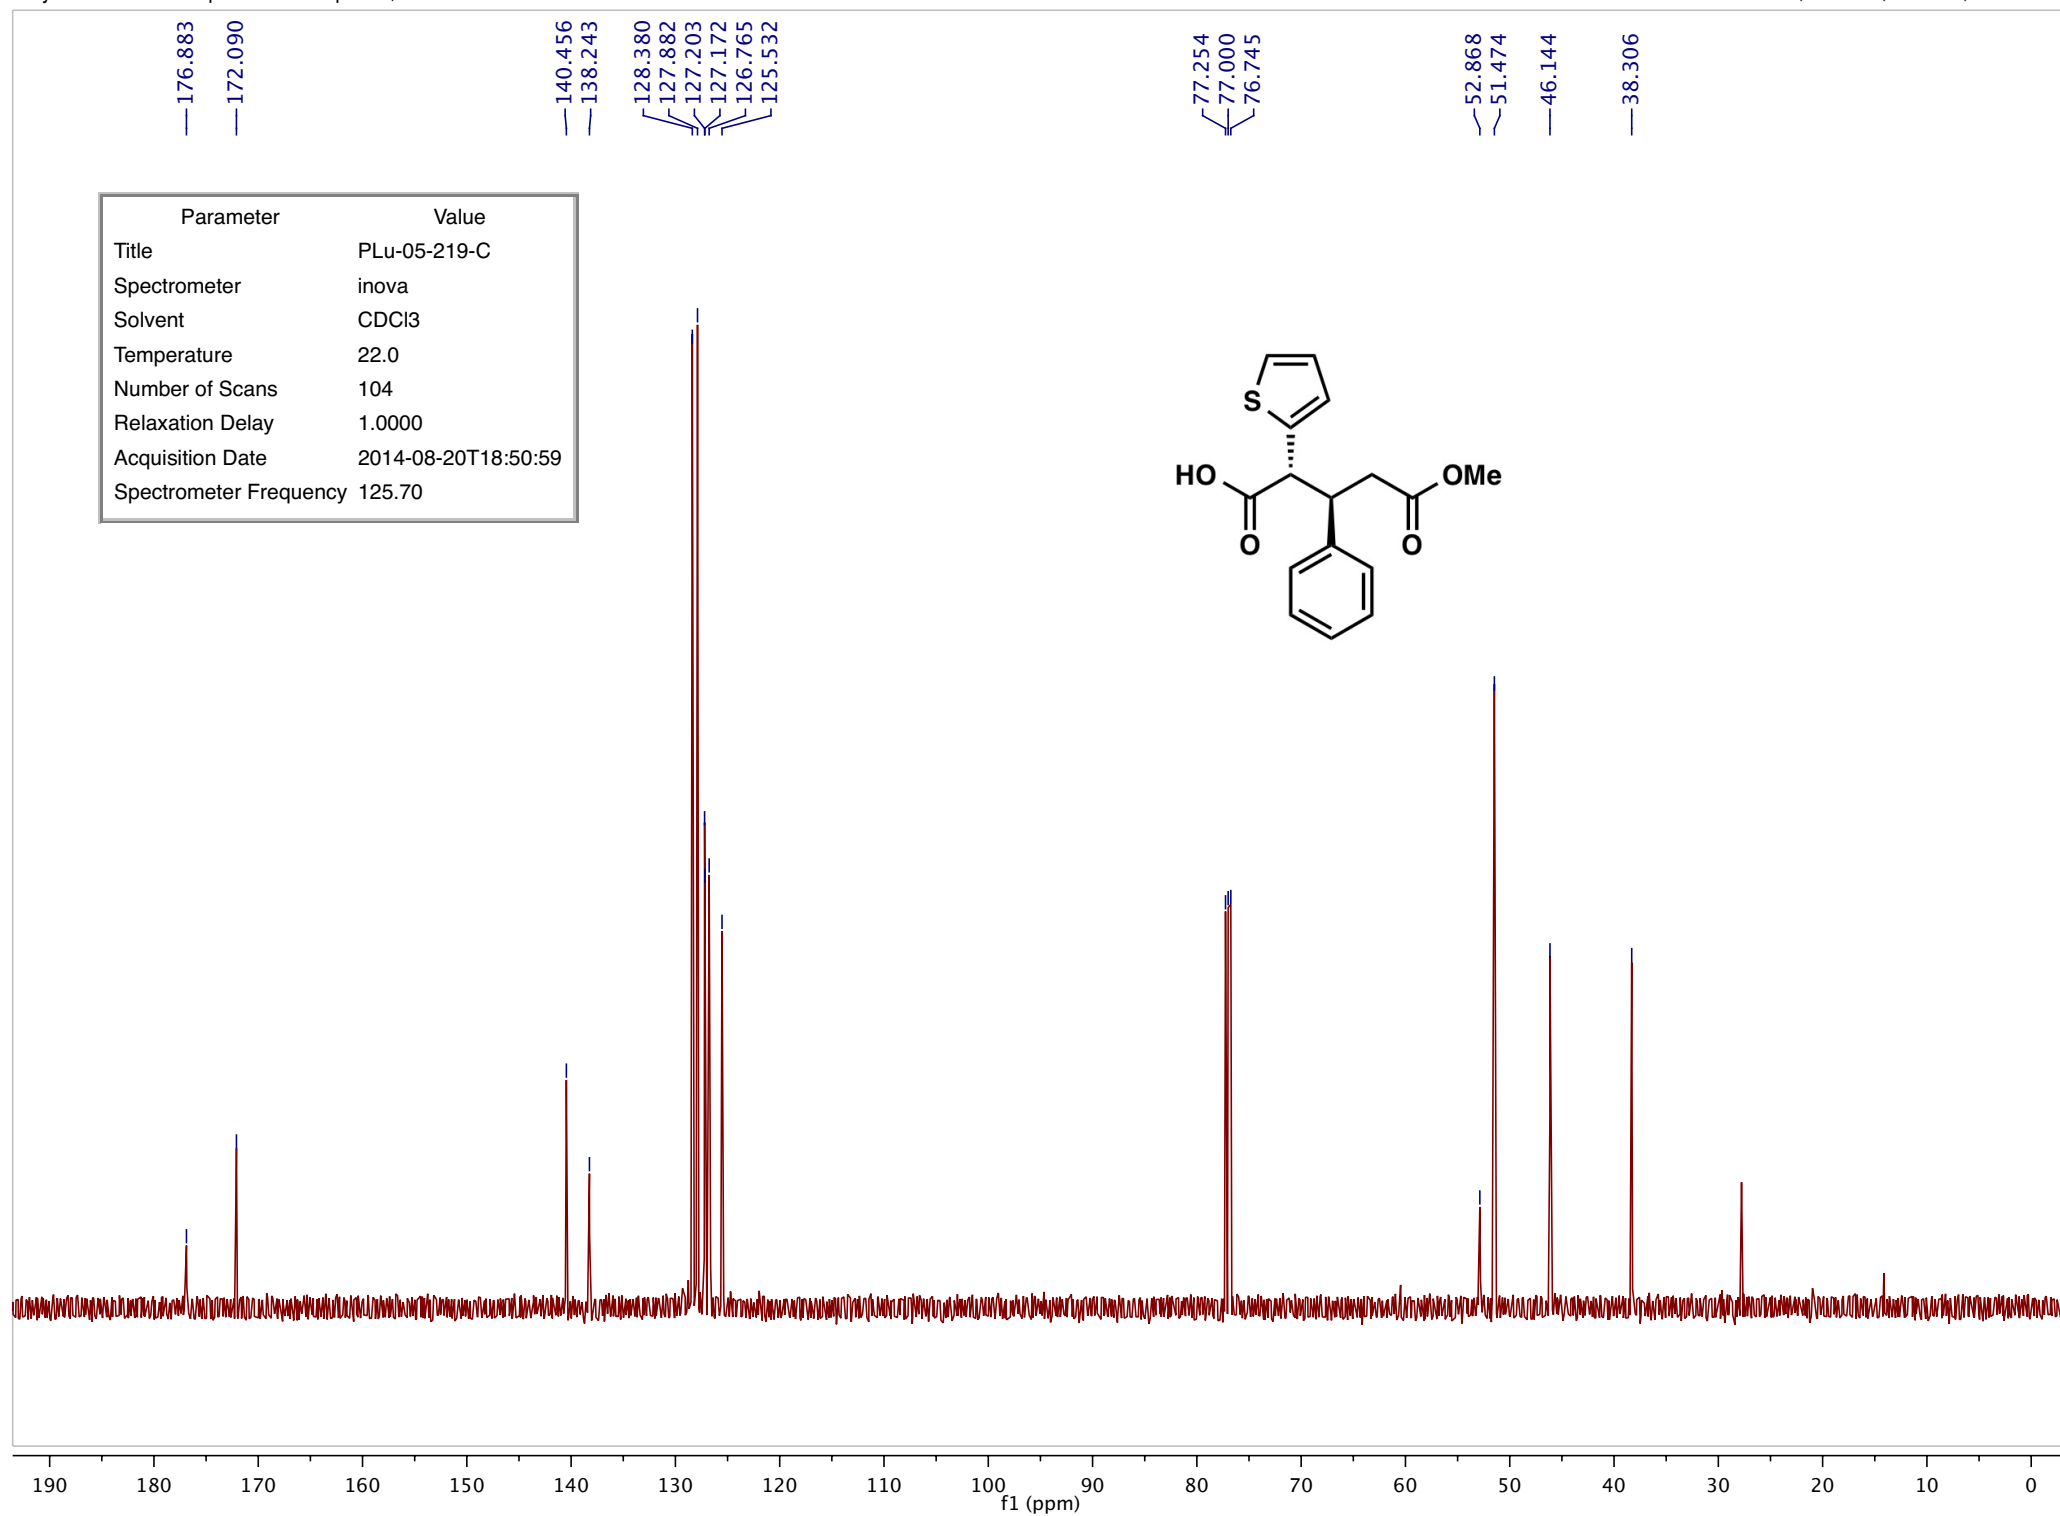

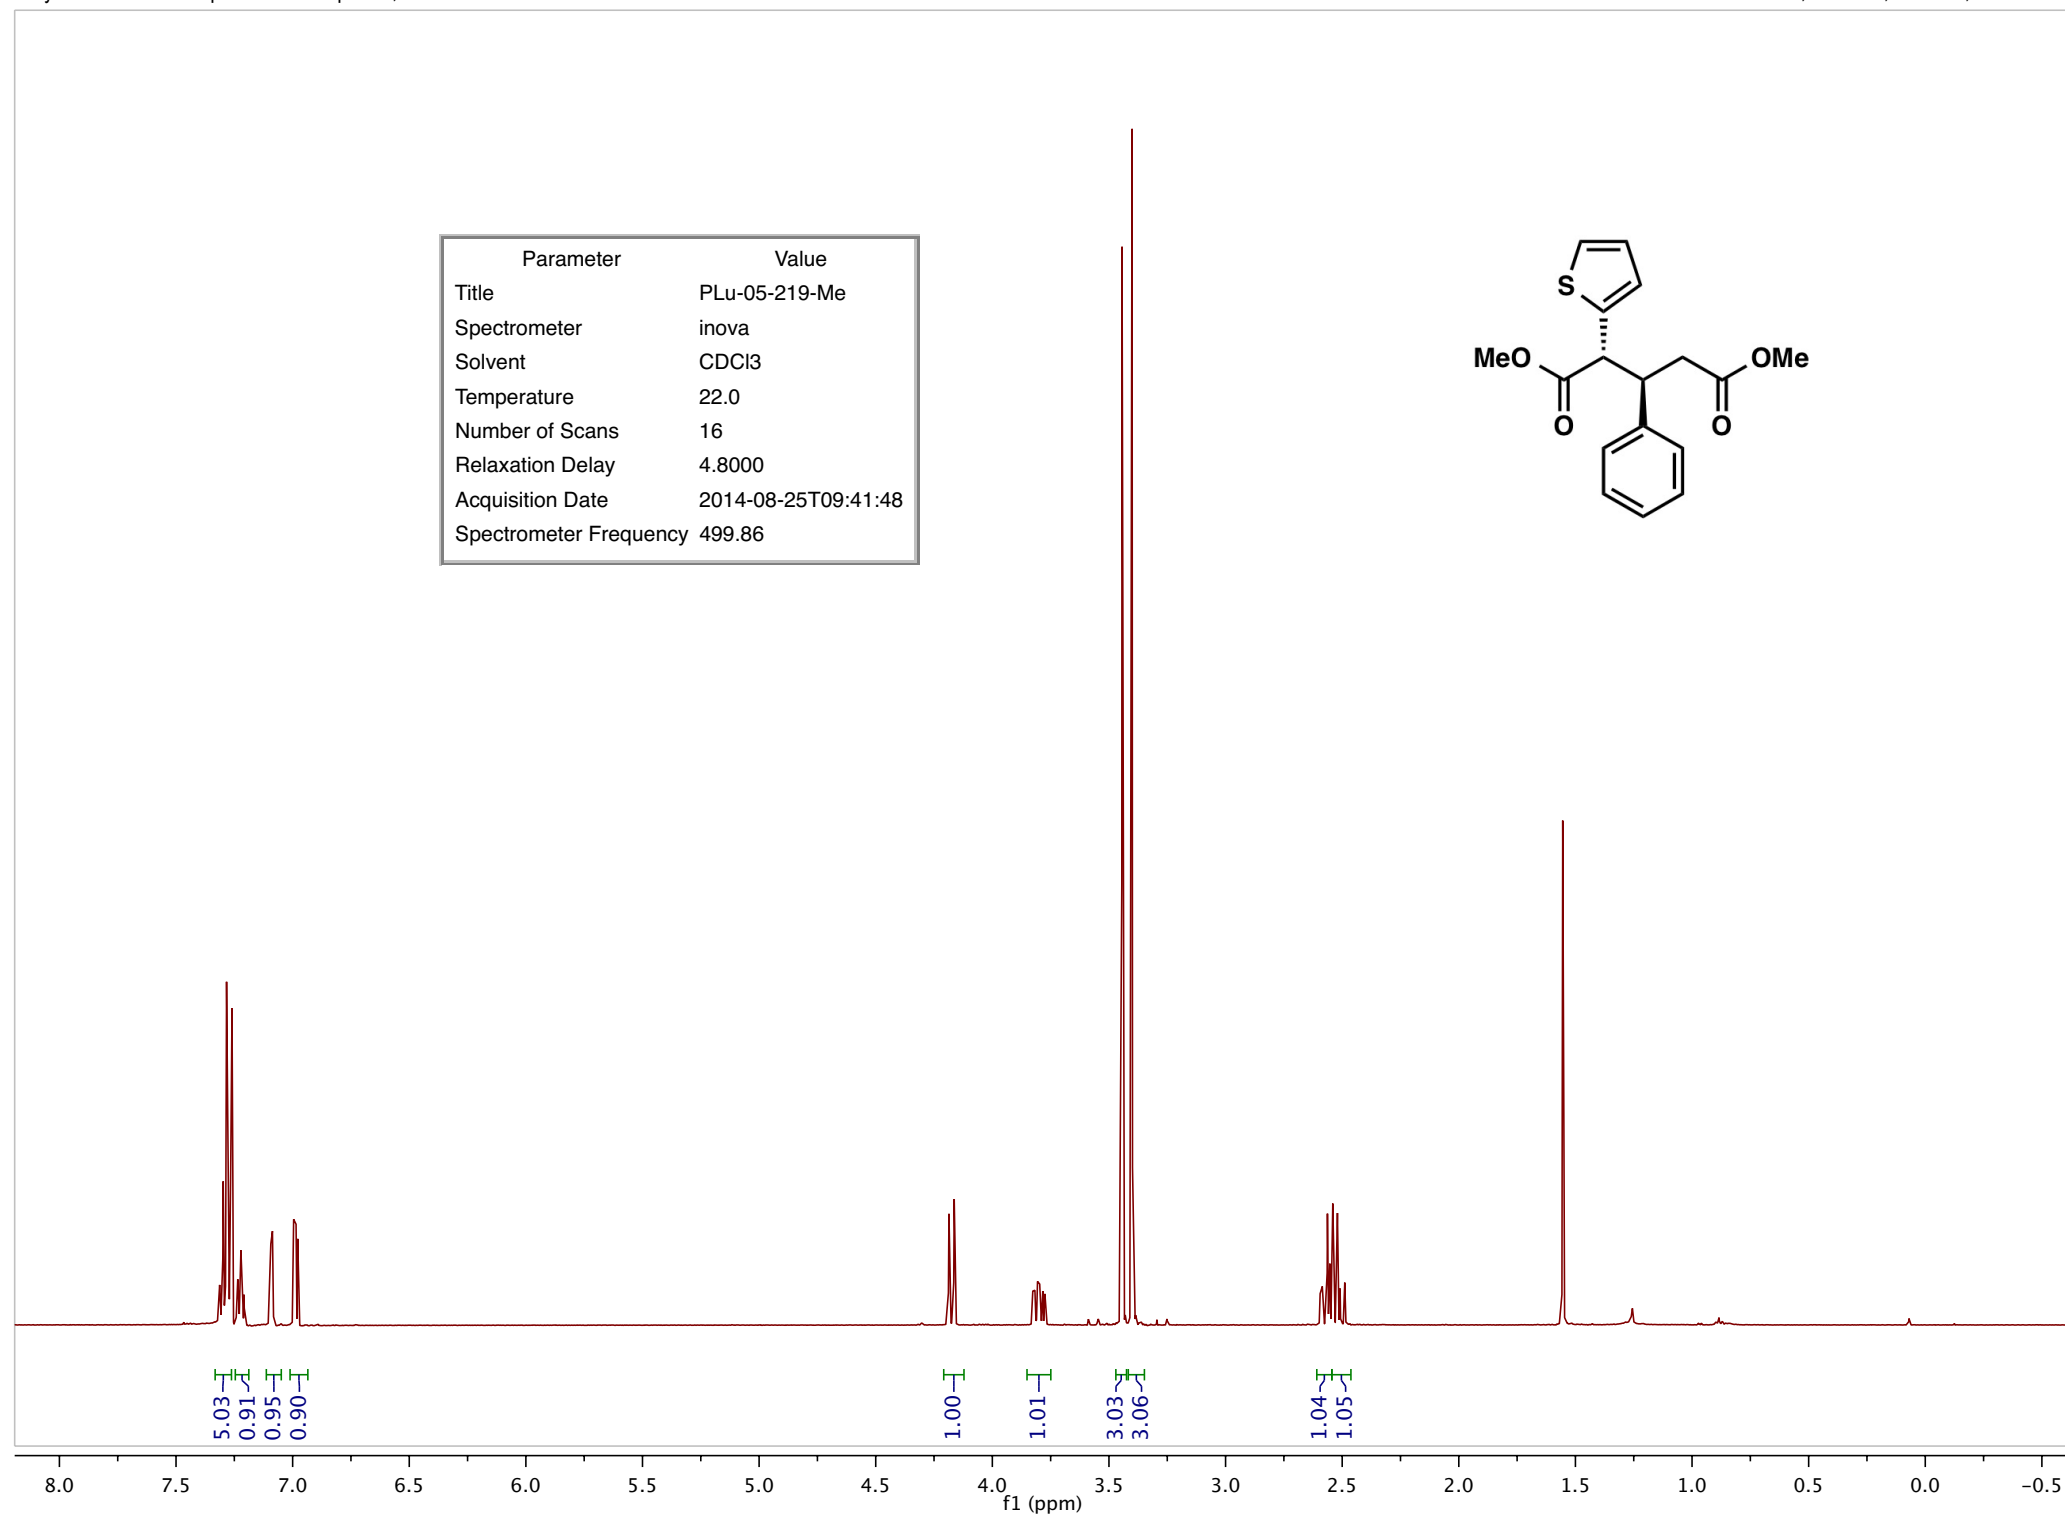



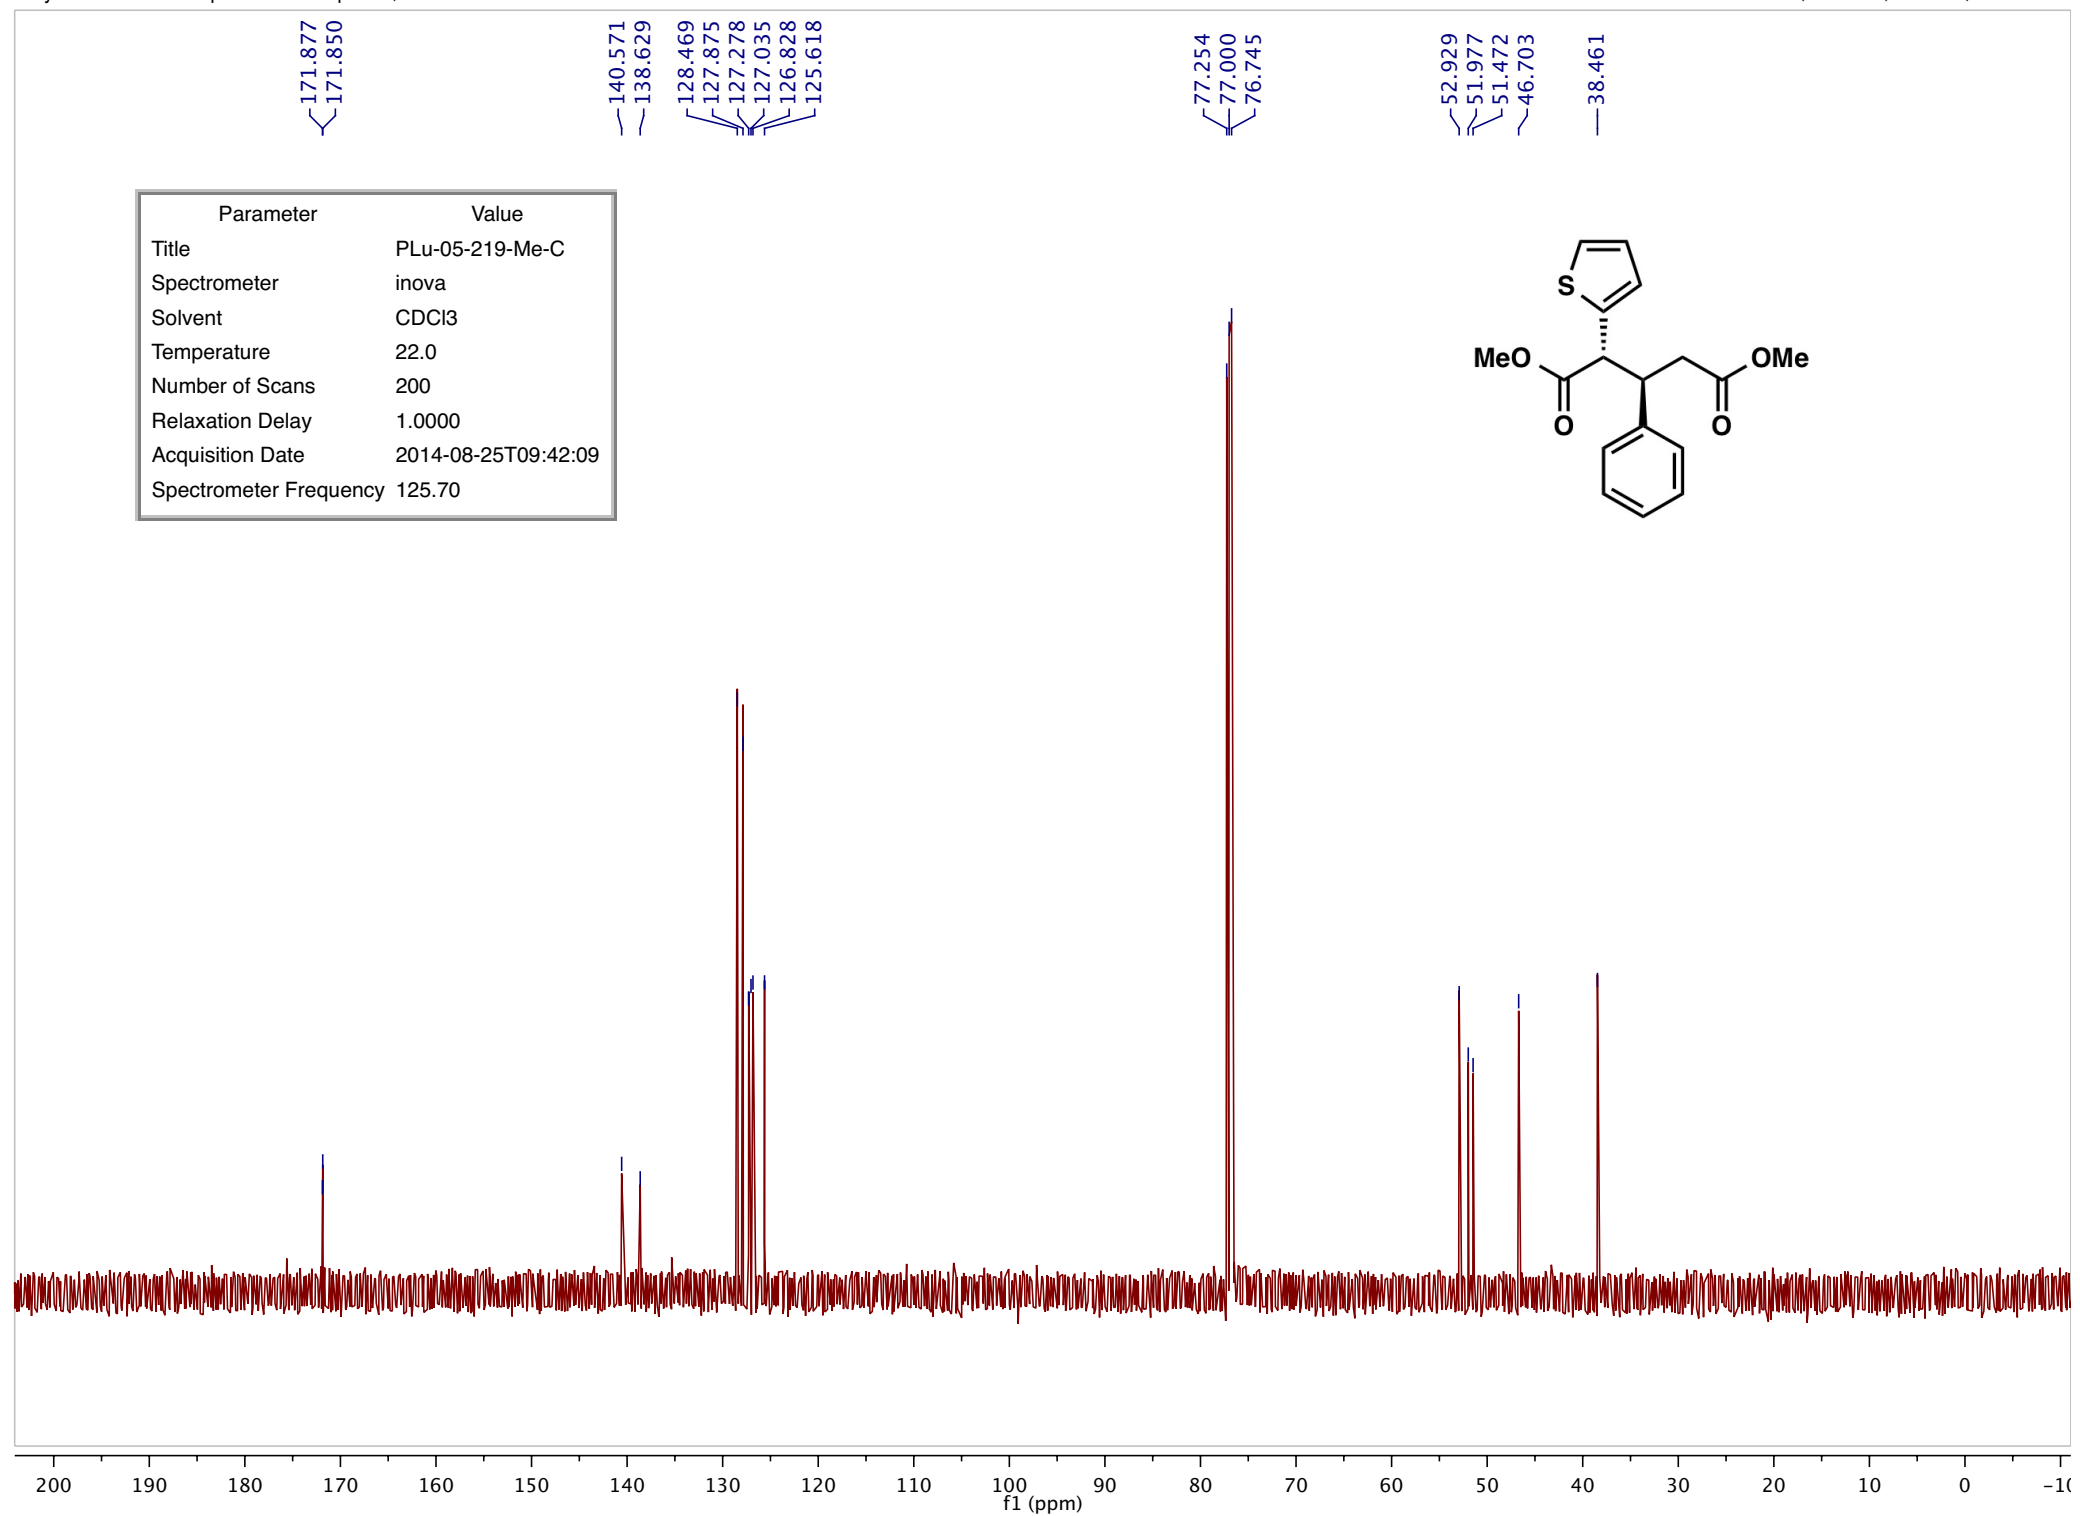

| Parameter              | Value               |
|------------------------|---------------------|
| Title                  | PLu-05-219-Me-C     |
| Spectrometer           | inova               |
| Solvent                | CDCl3               |
| Temperature            | 22.0                |
| Number of Scans        | 200                 |
| Relaxation Delay       | 1.0000              |
| Acquisition Date       | 2014-08-25T09:42:09 |
| Spectrometer Frequency | 125.70              |

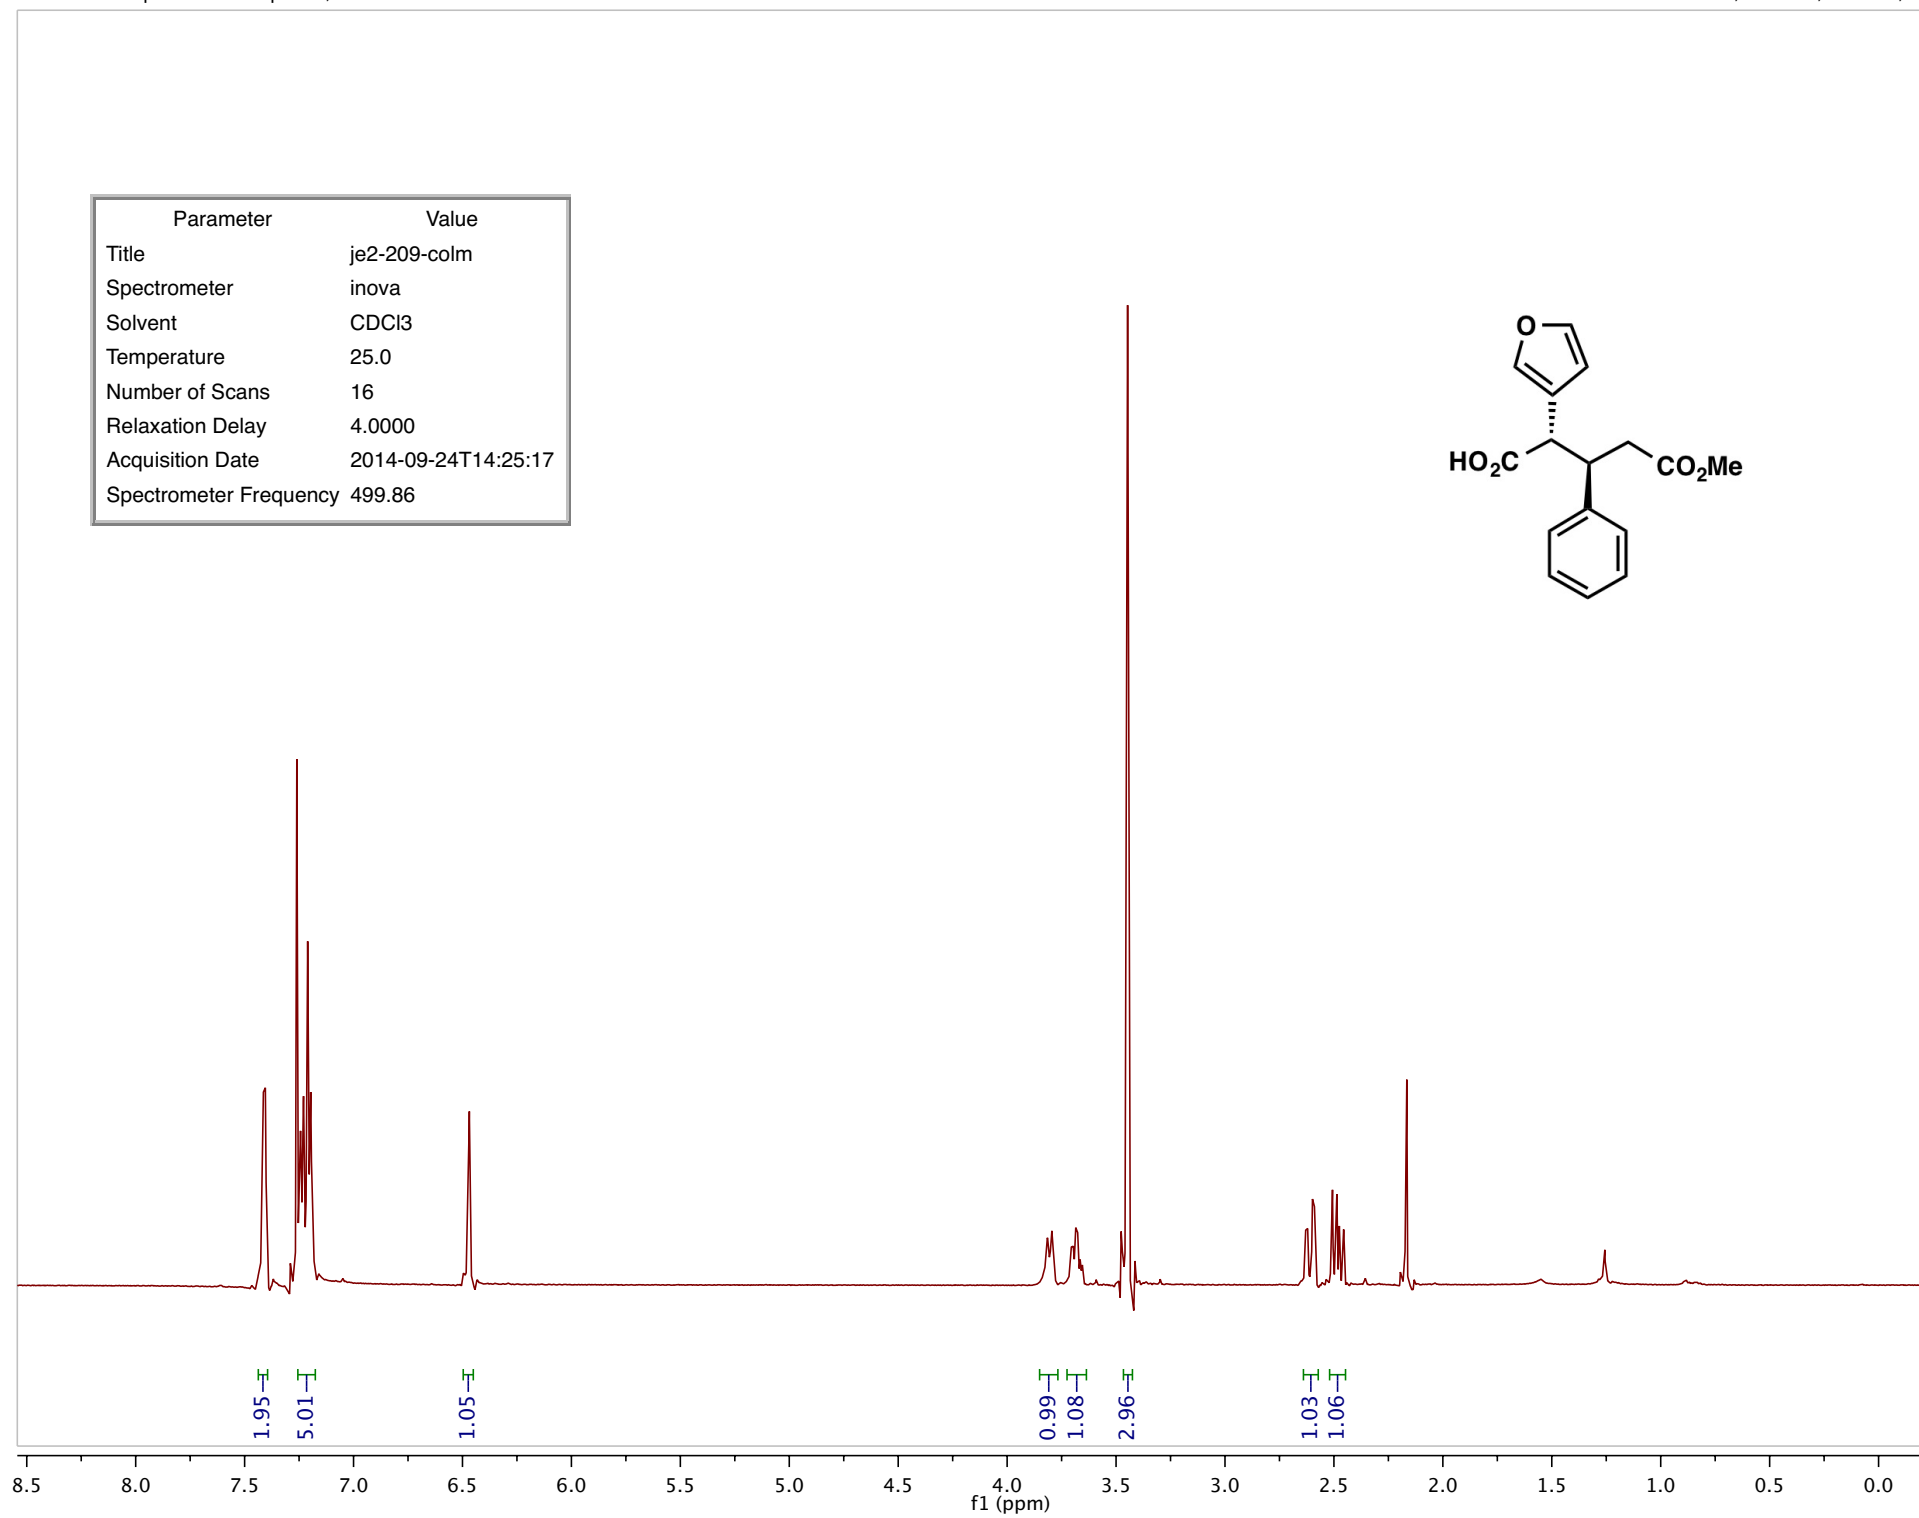

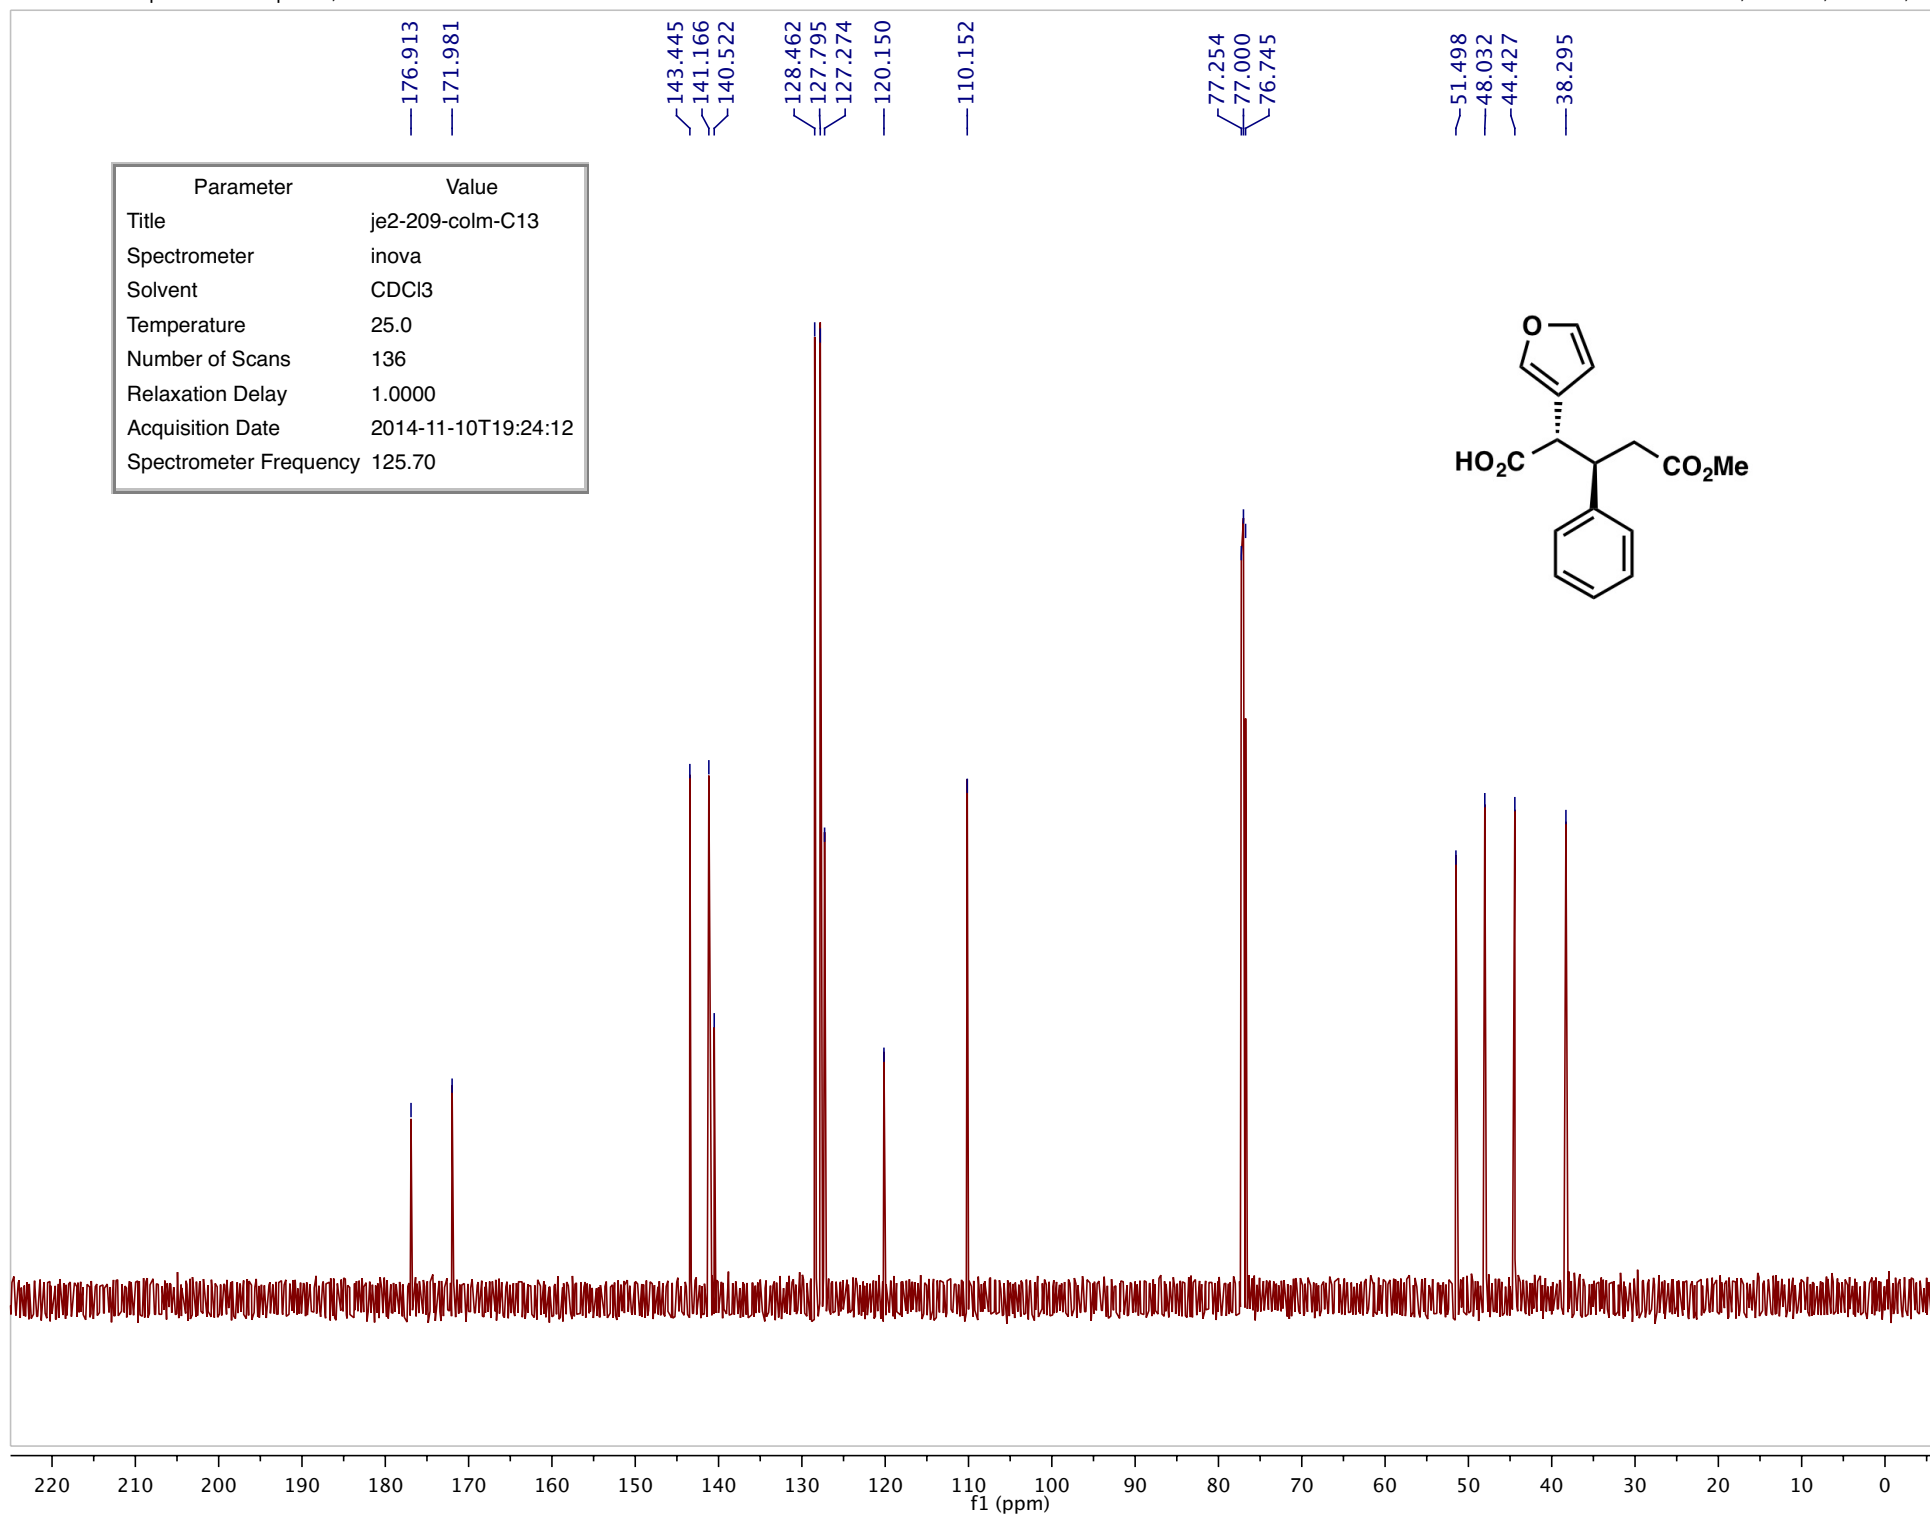

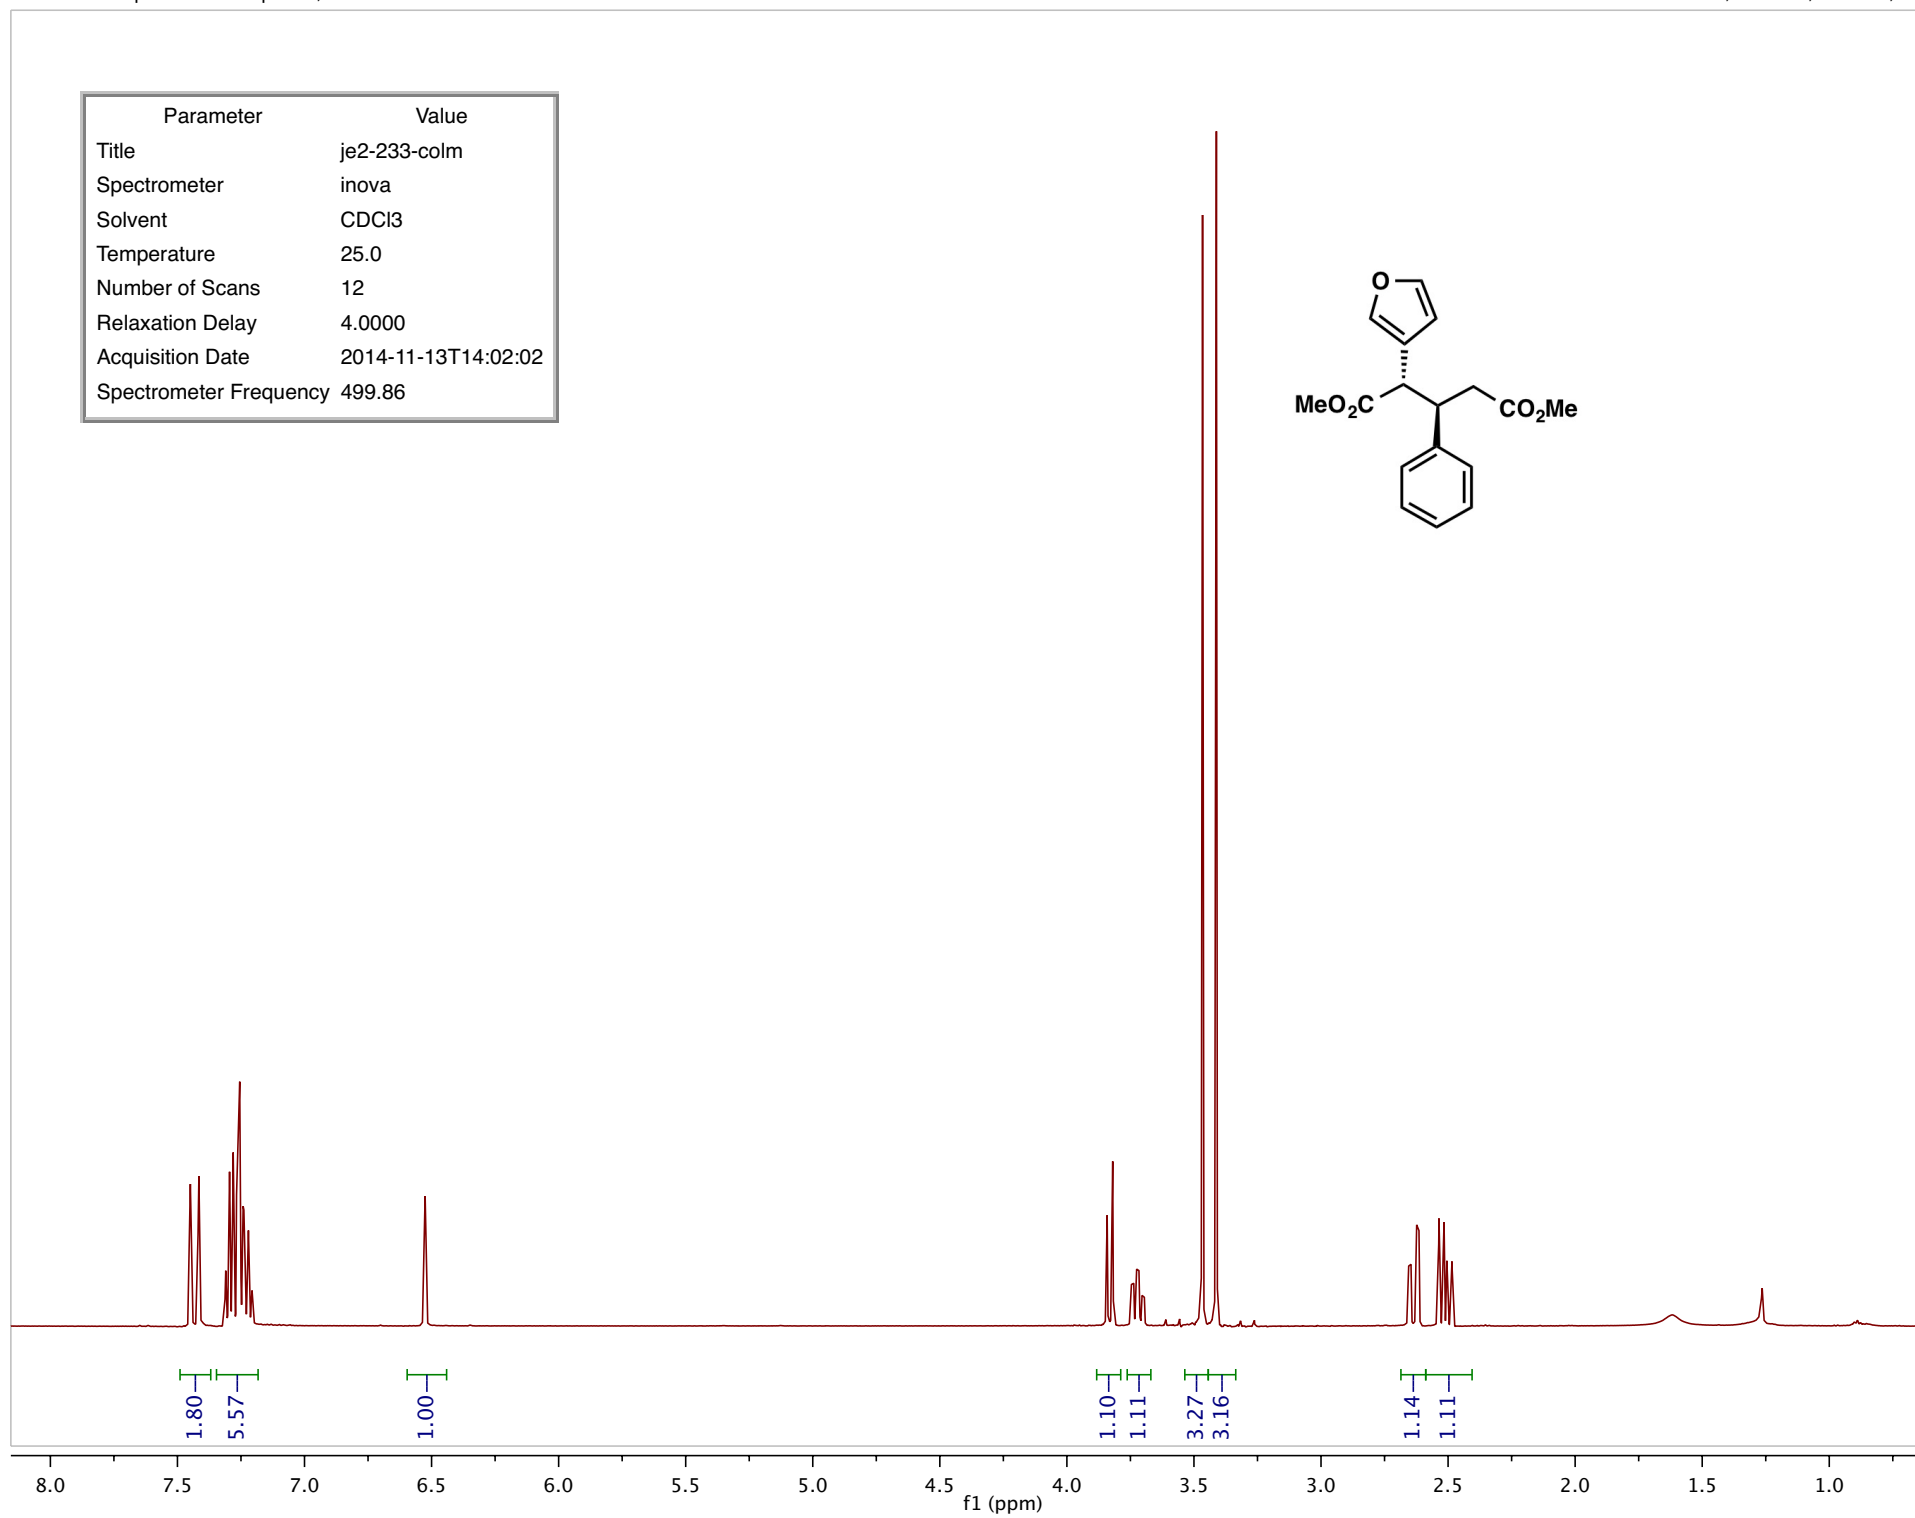

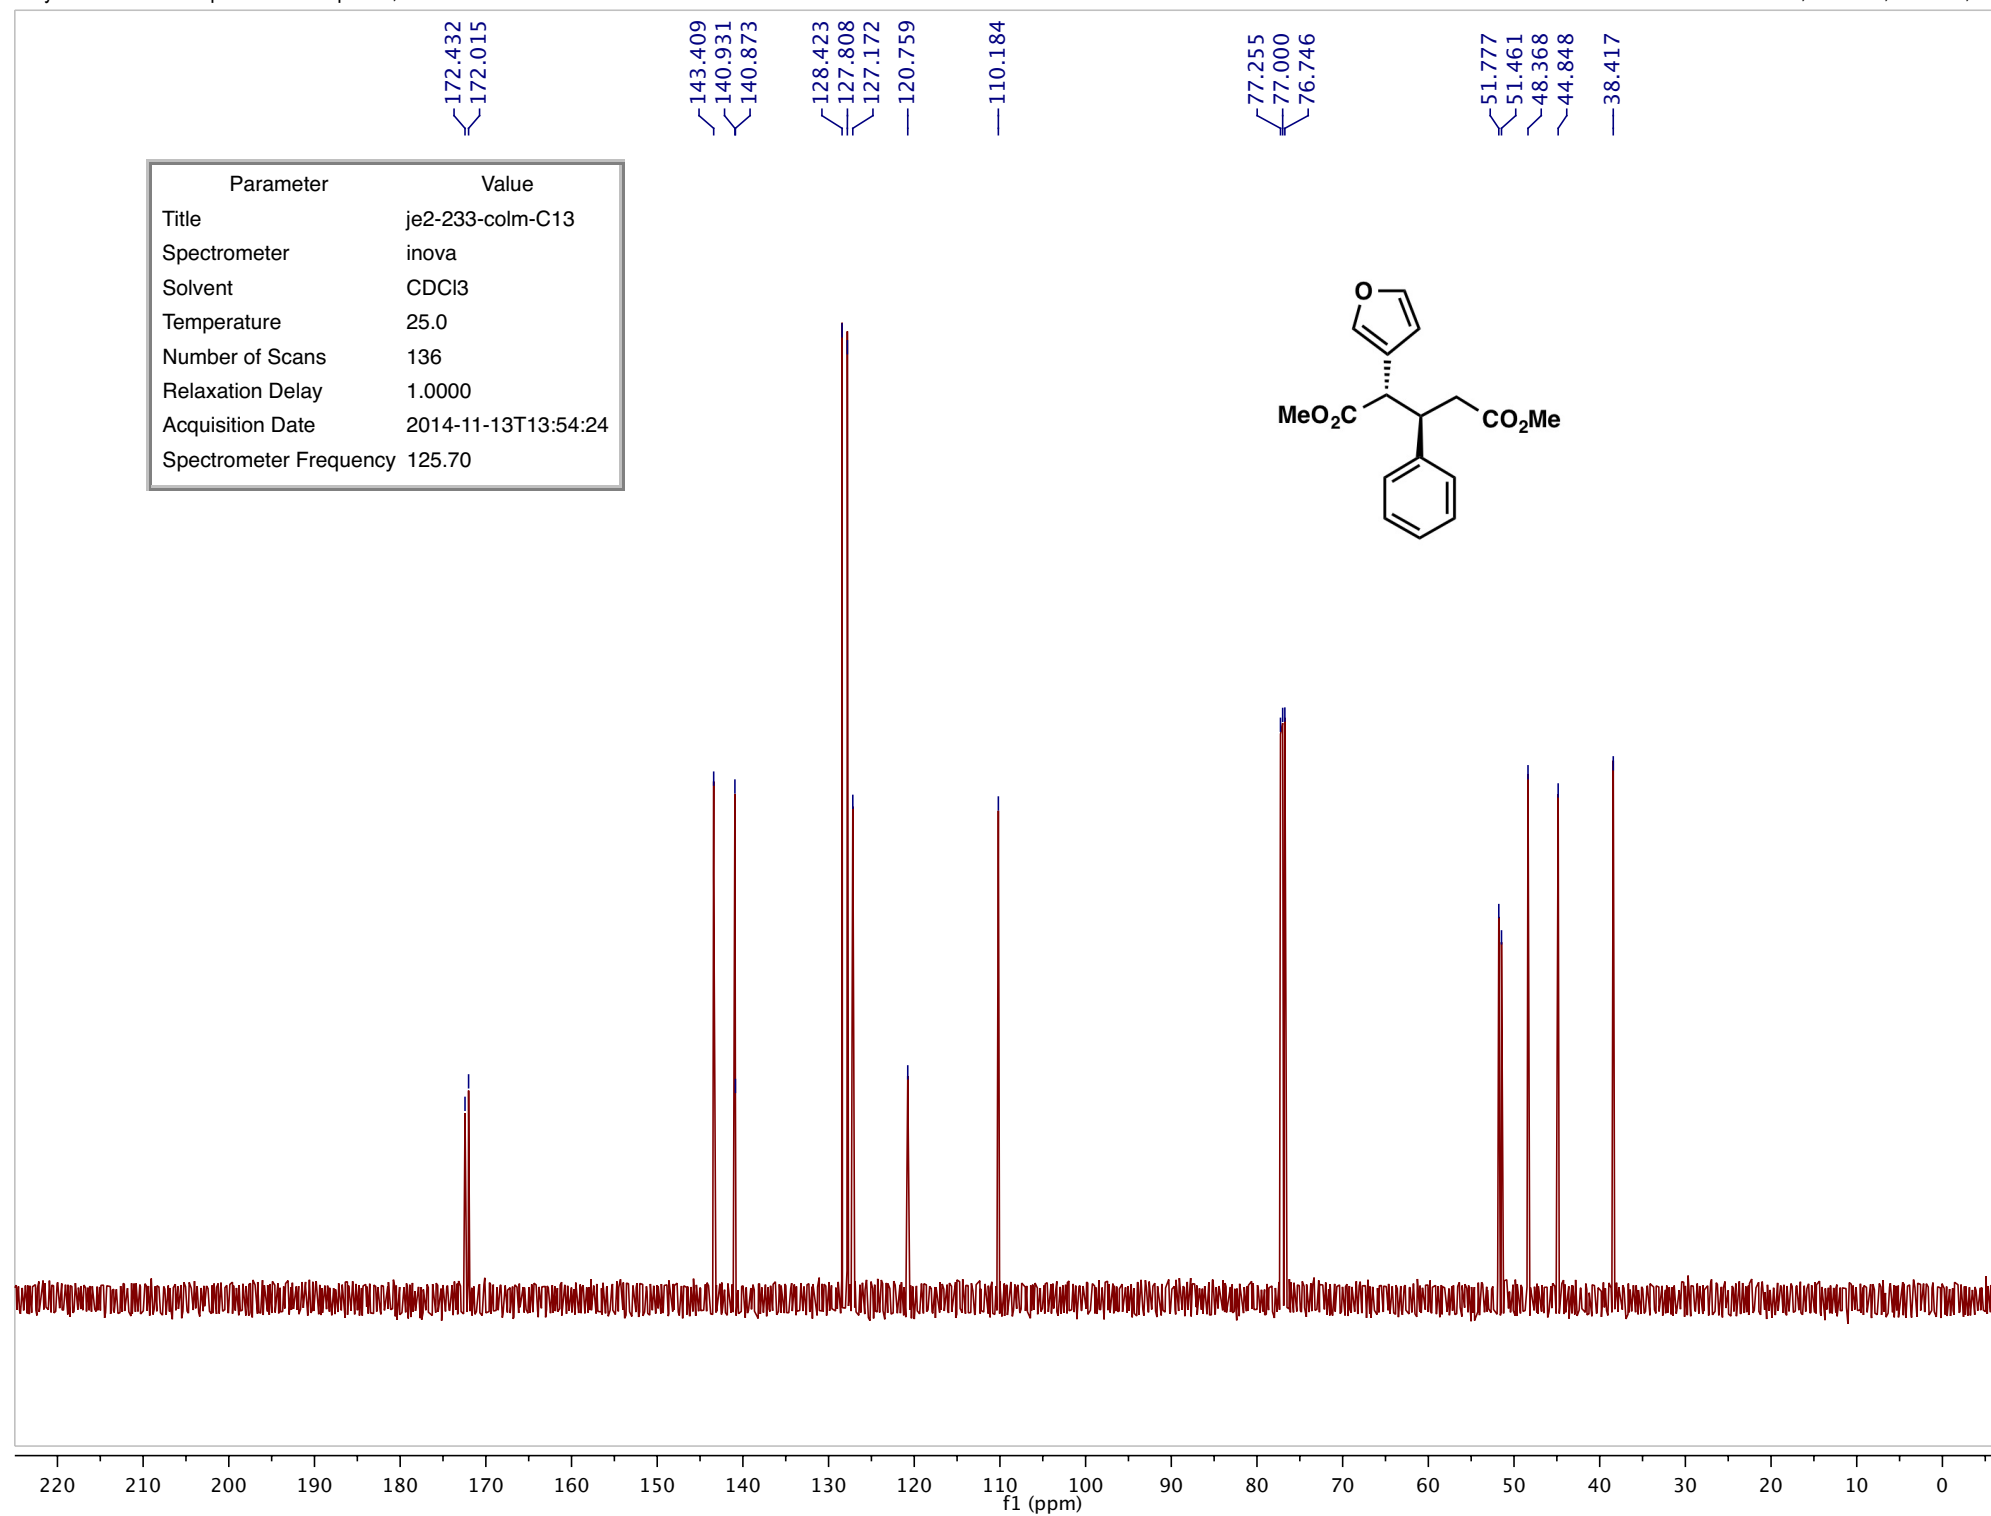

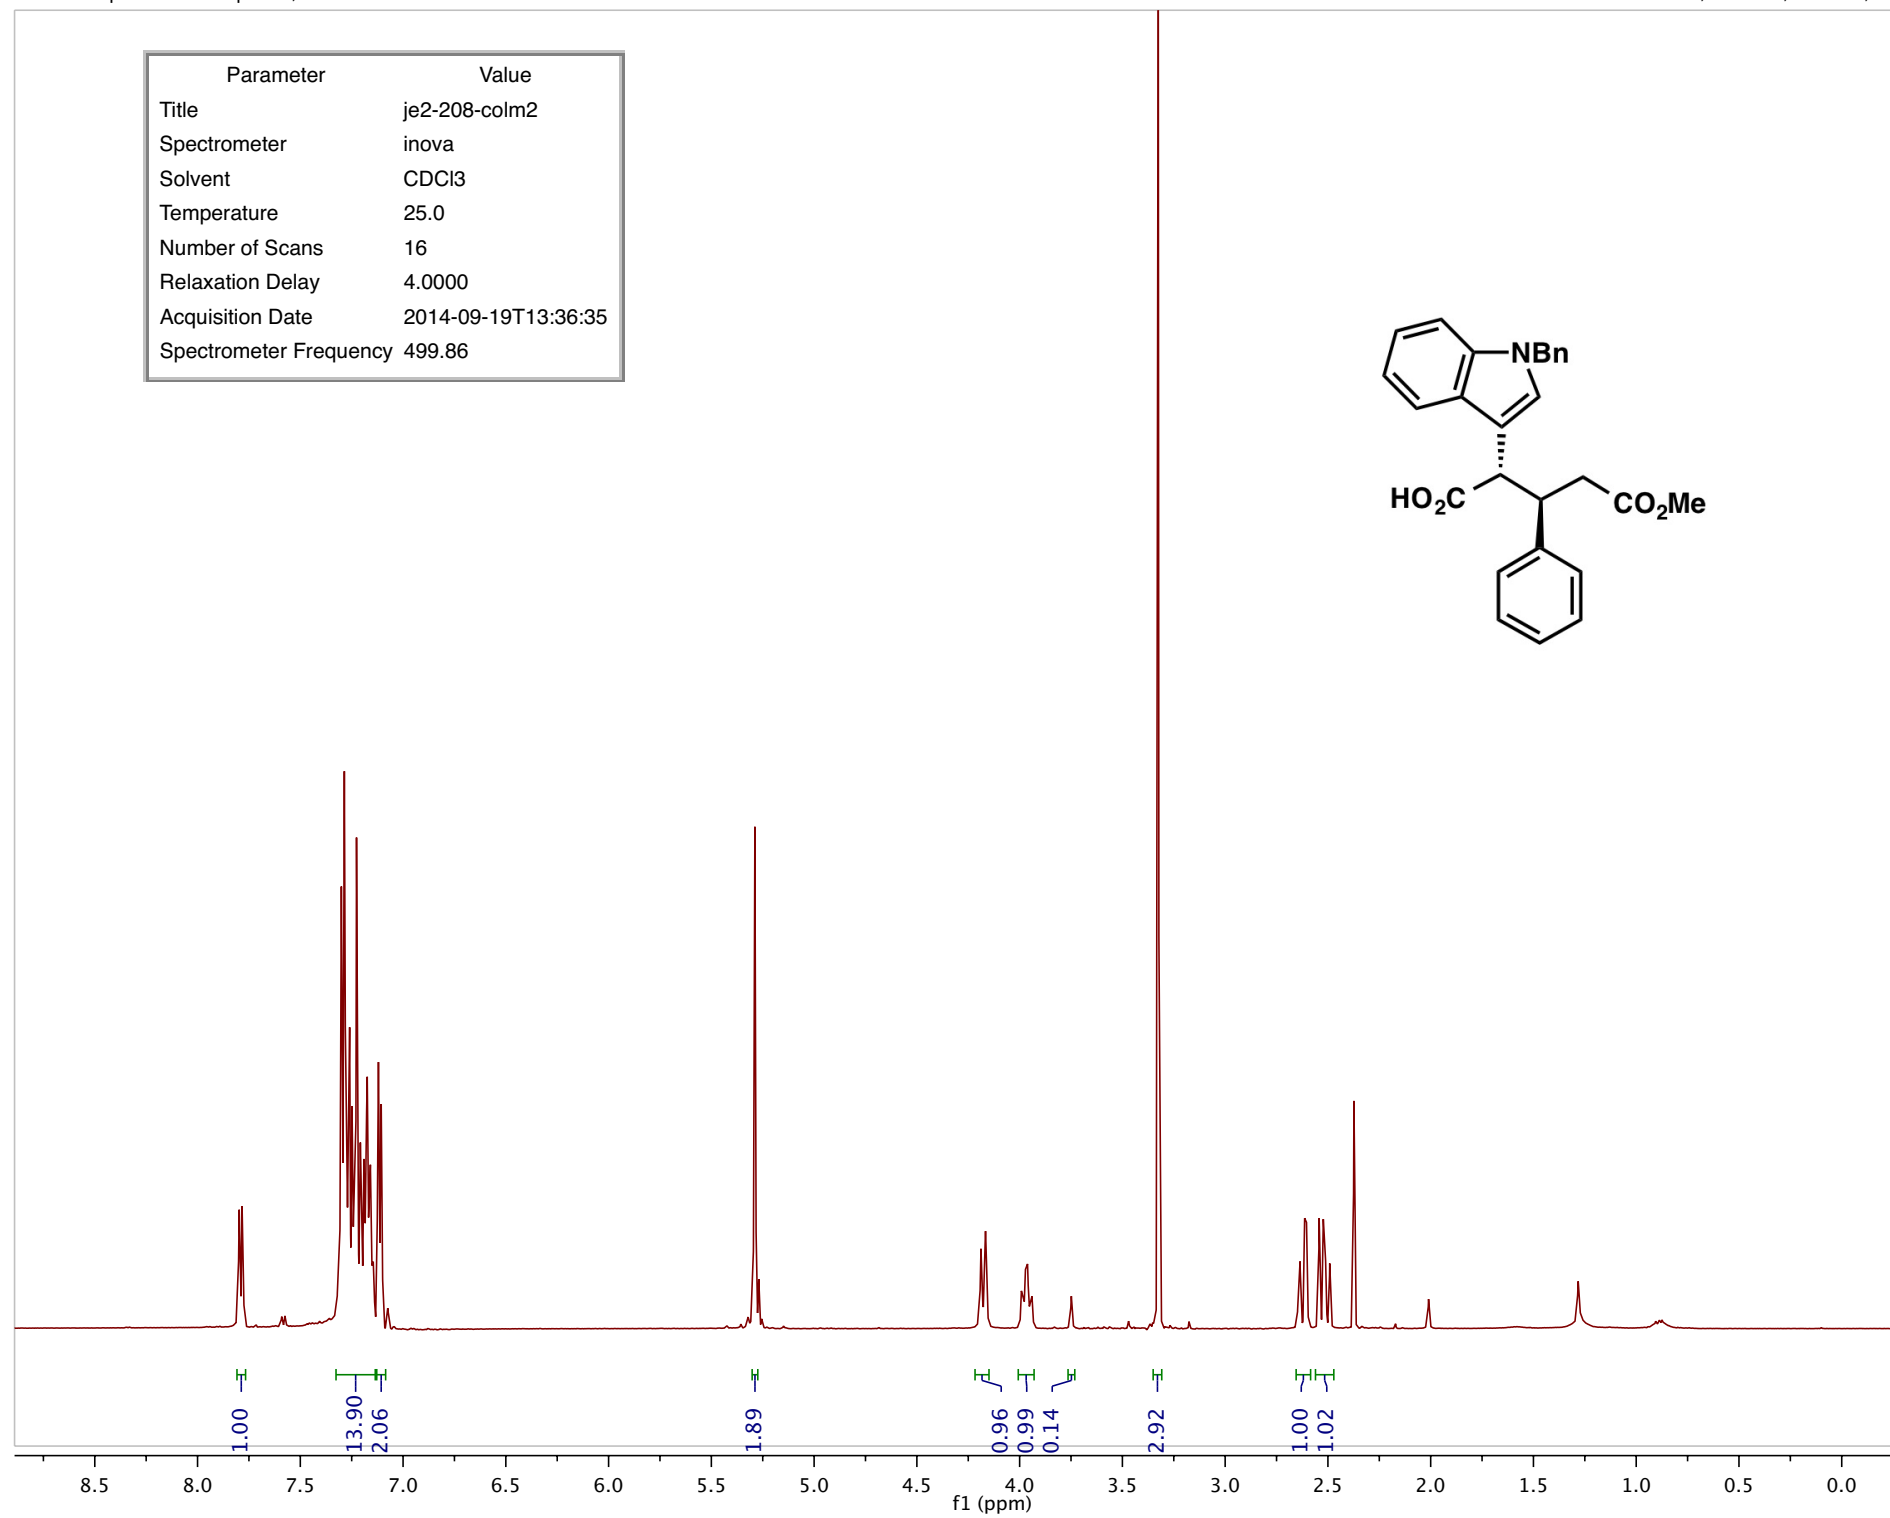

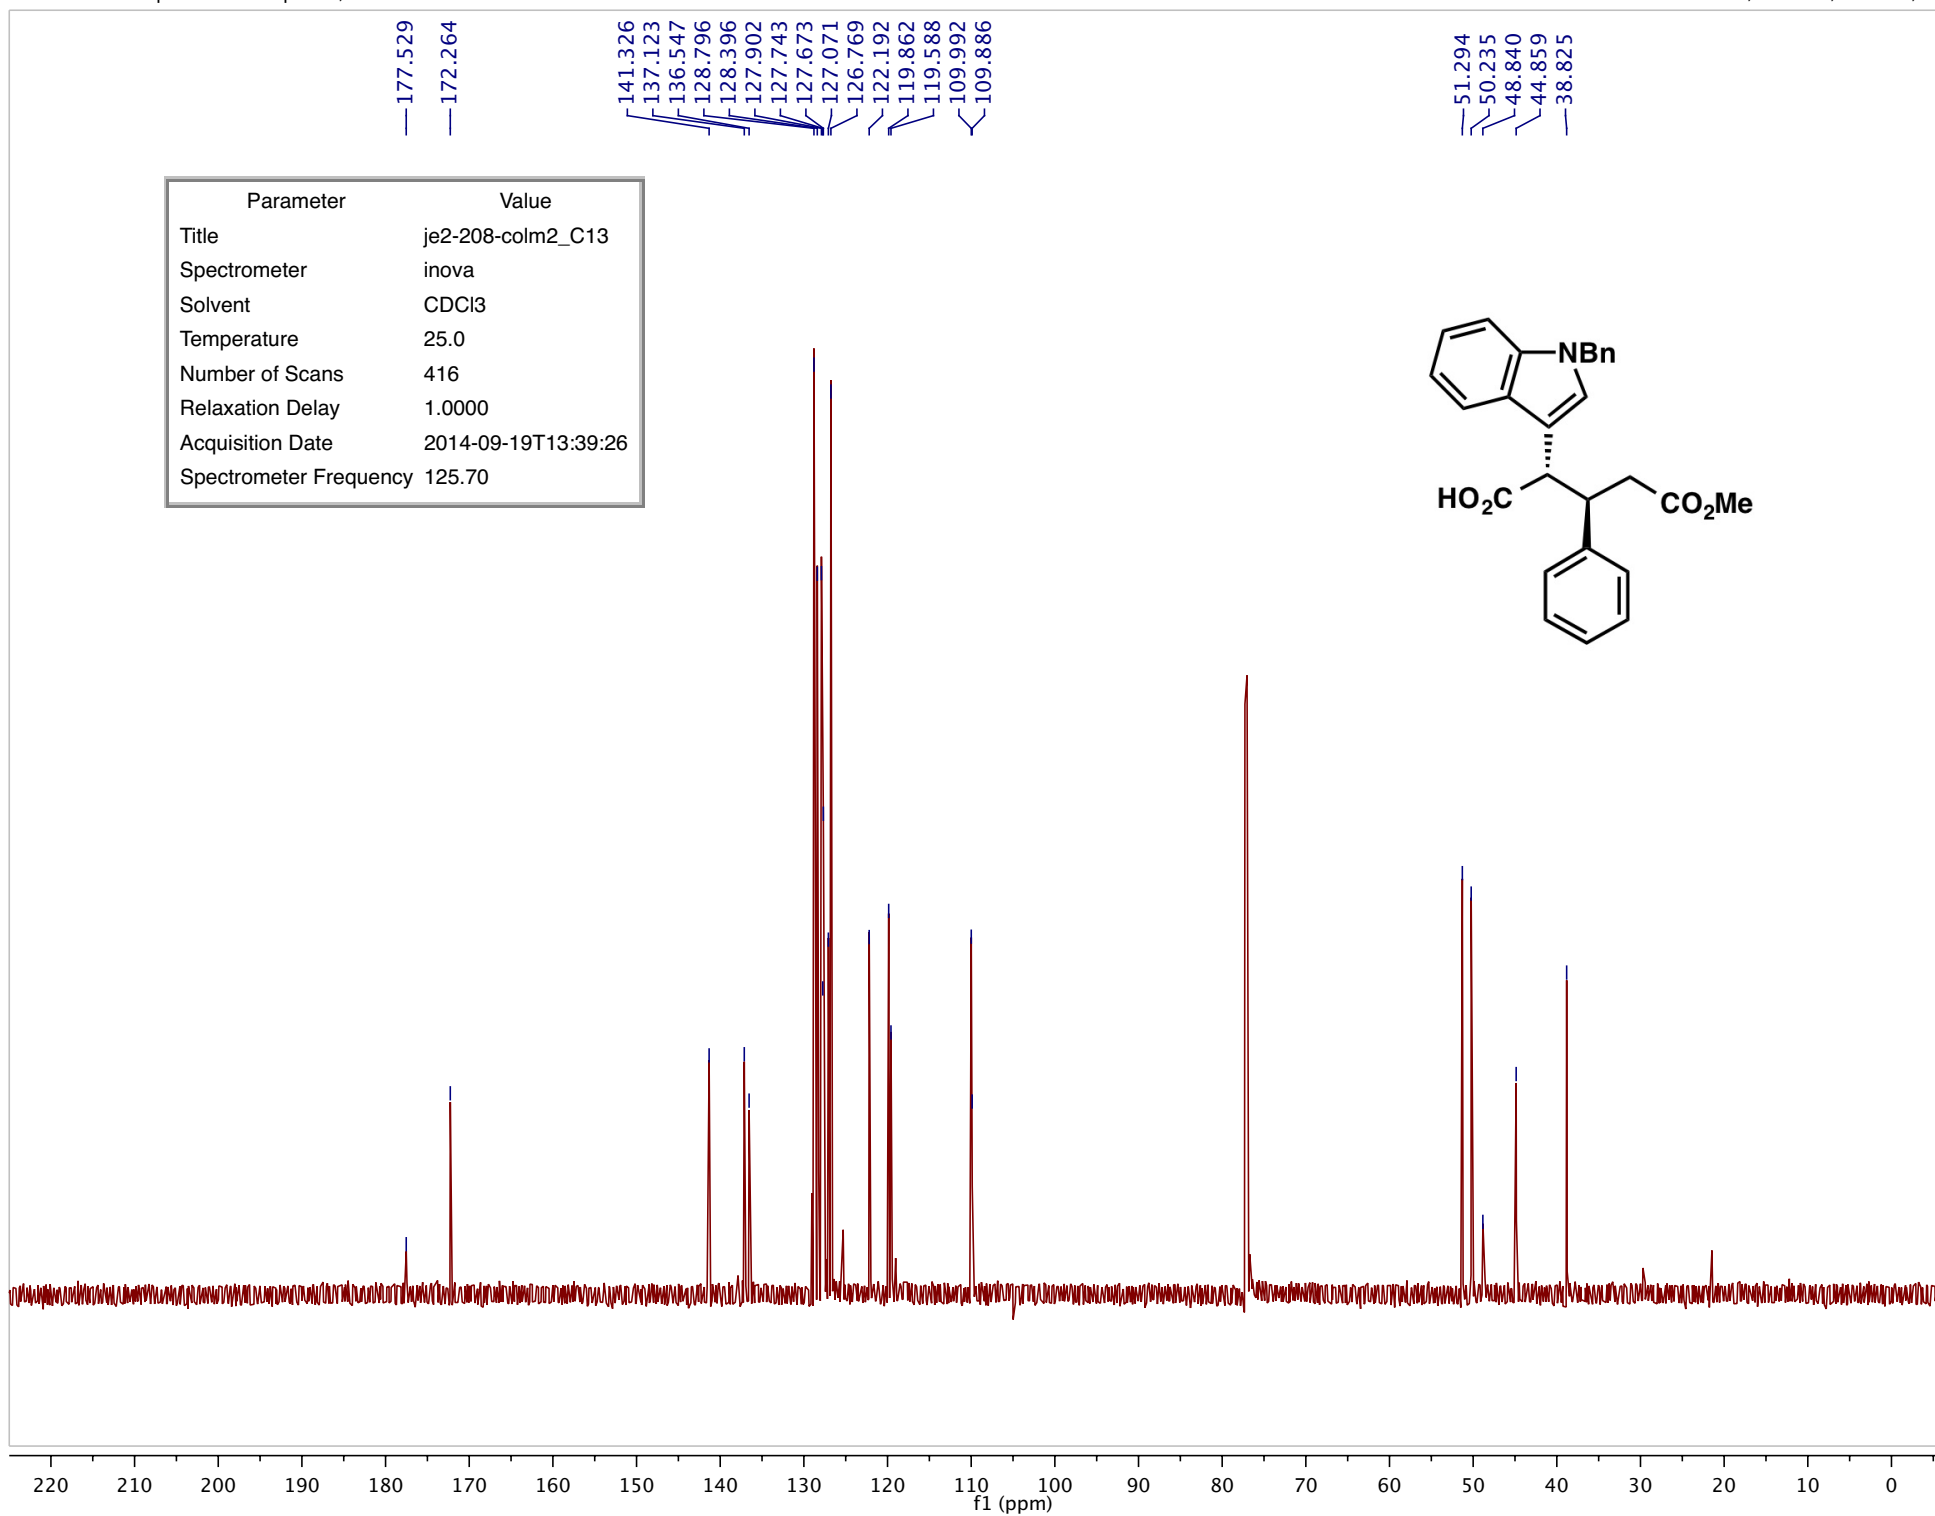

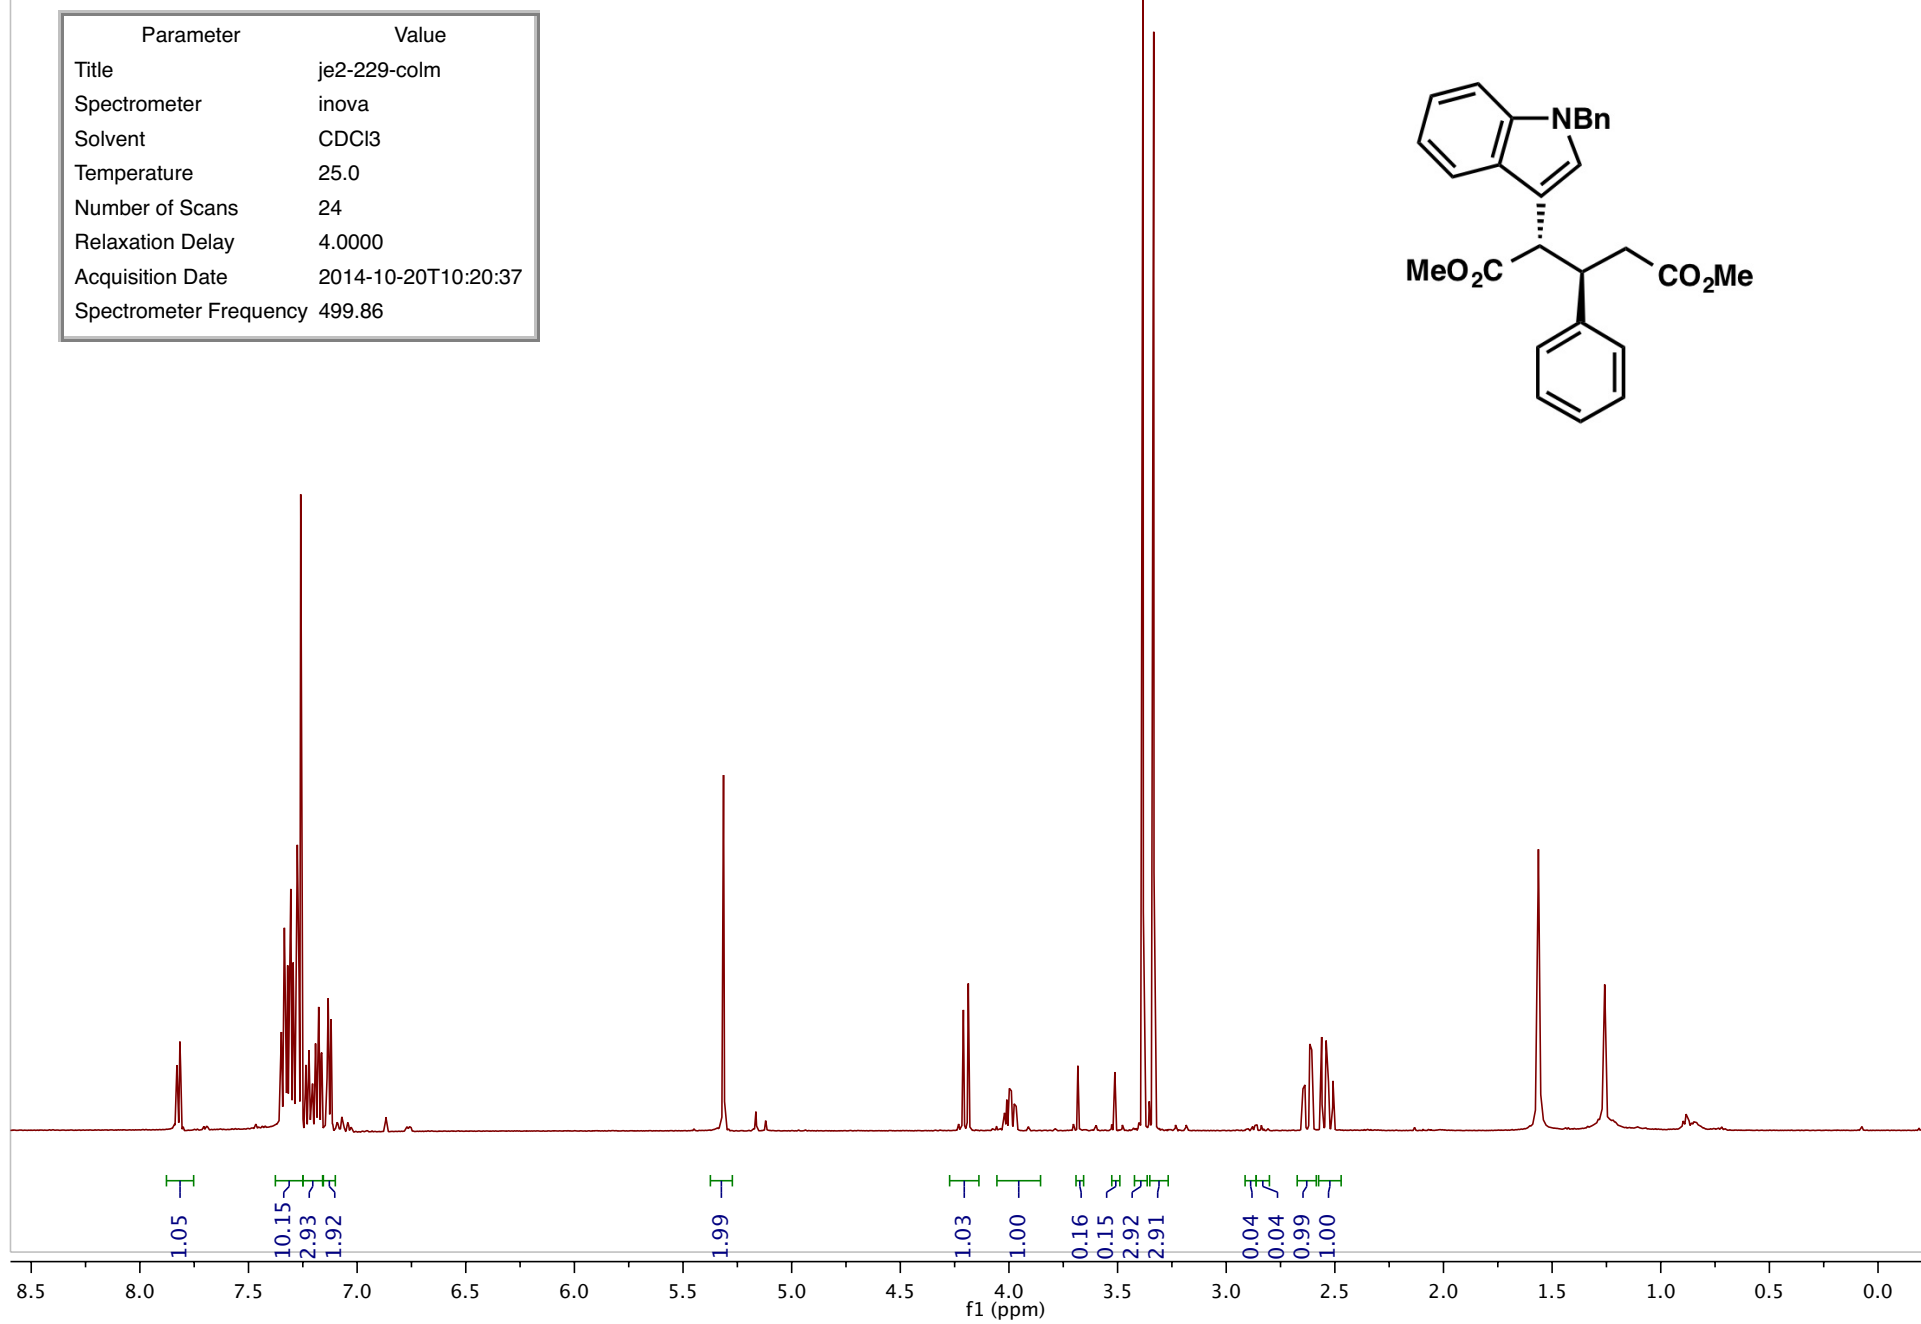



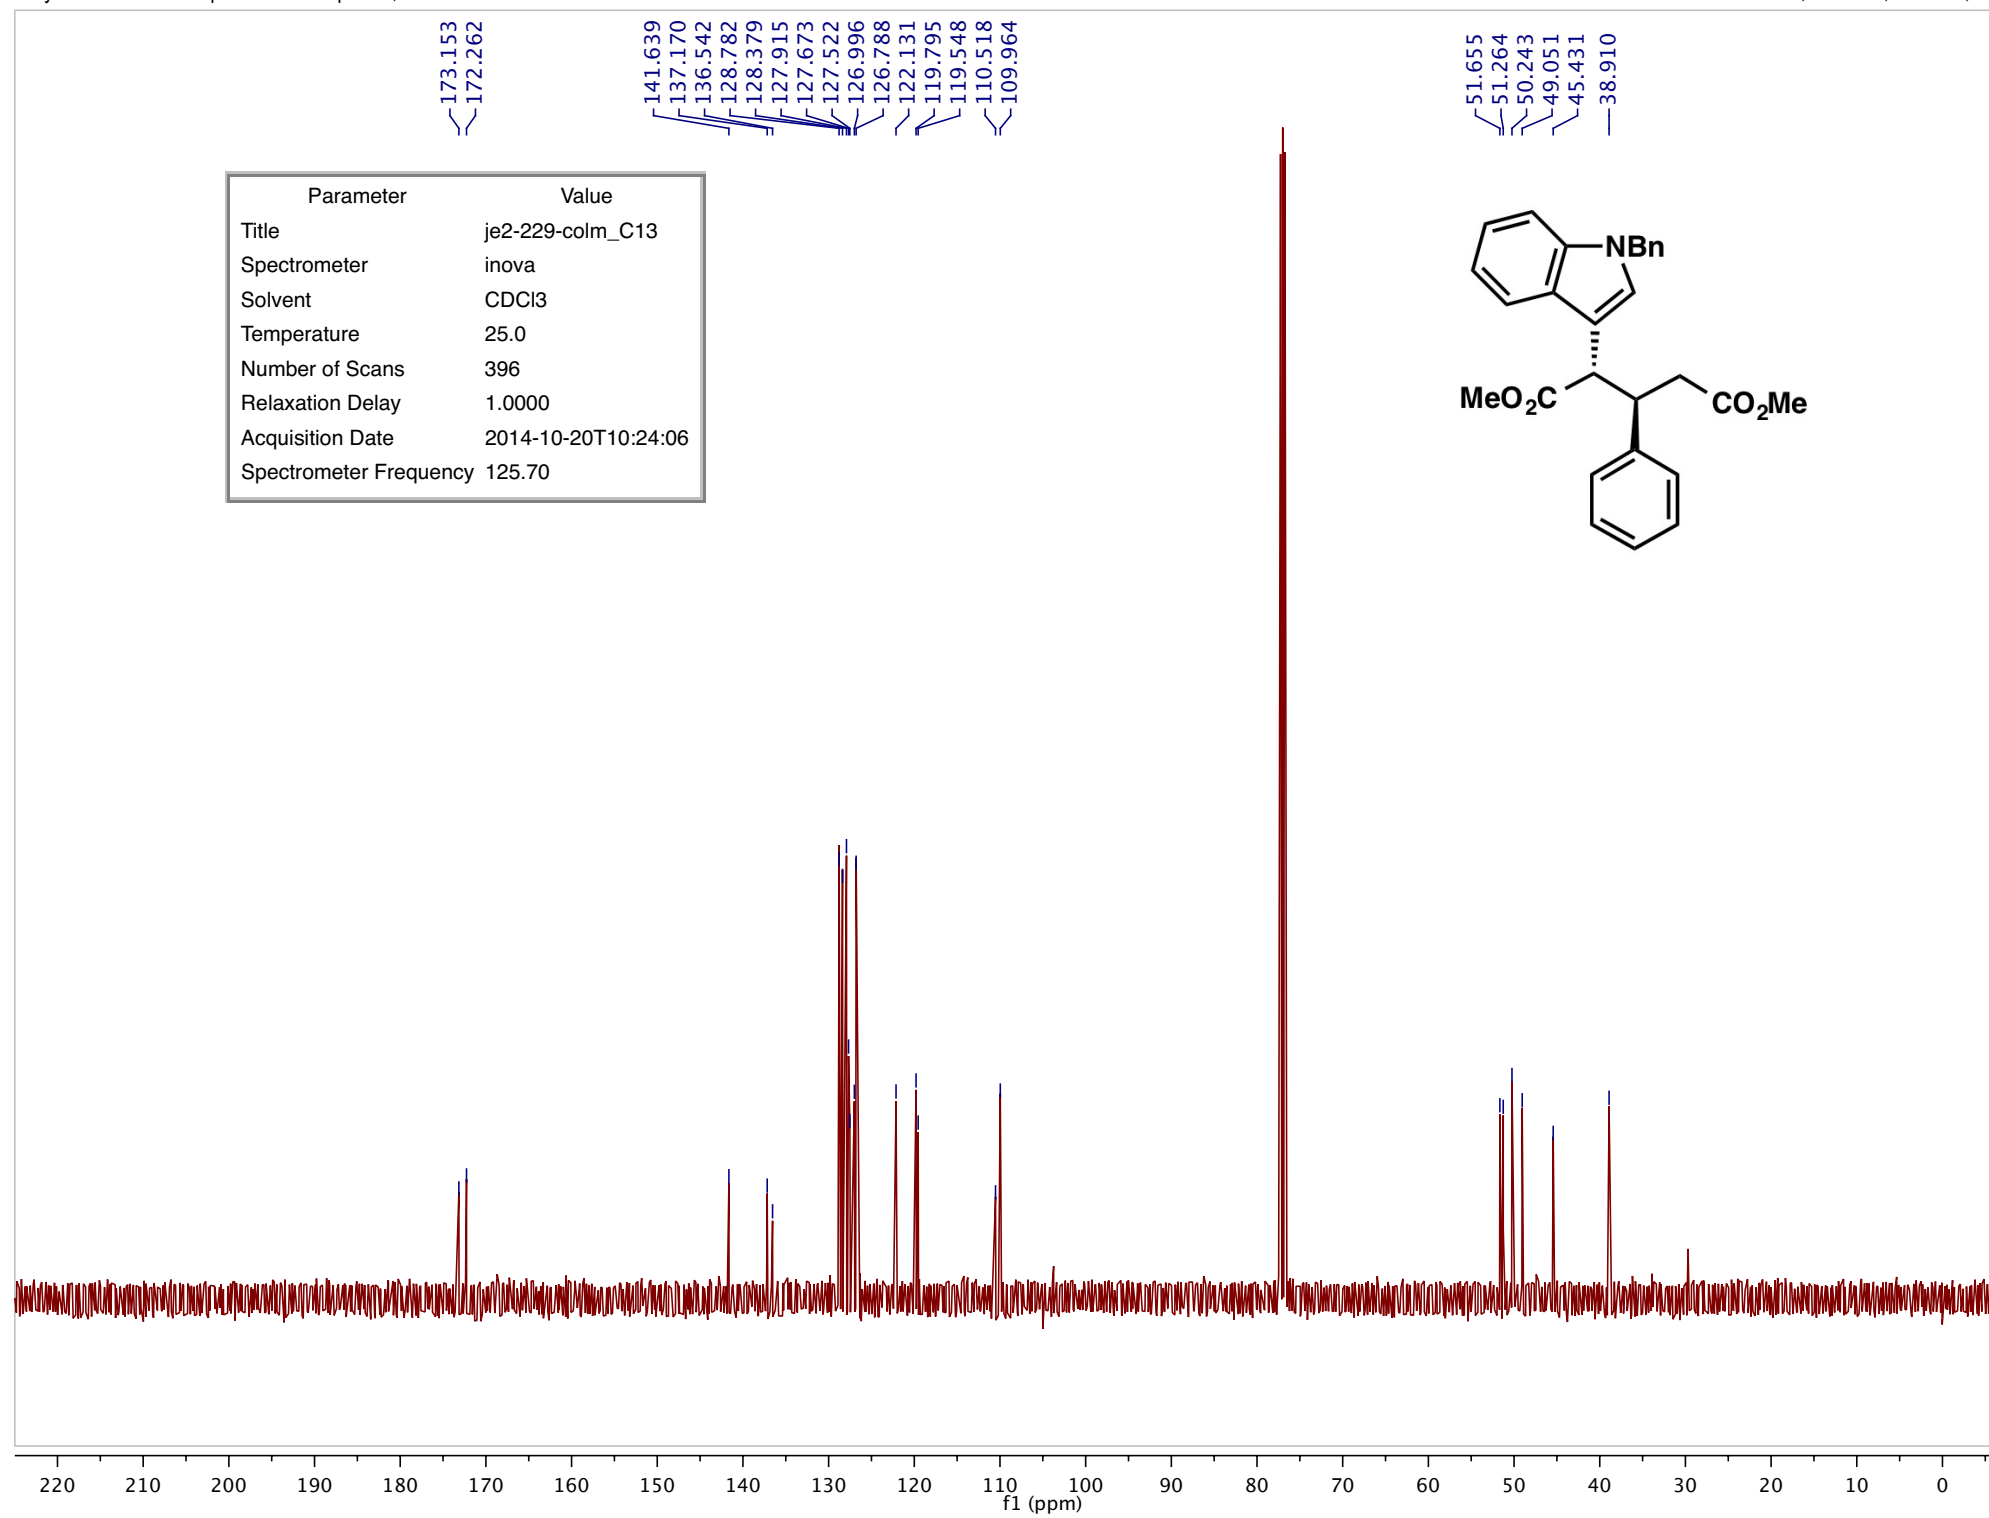

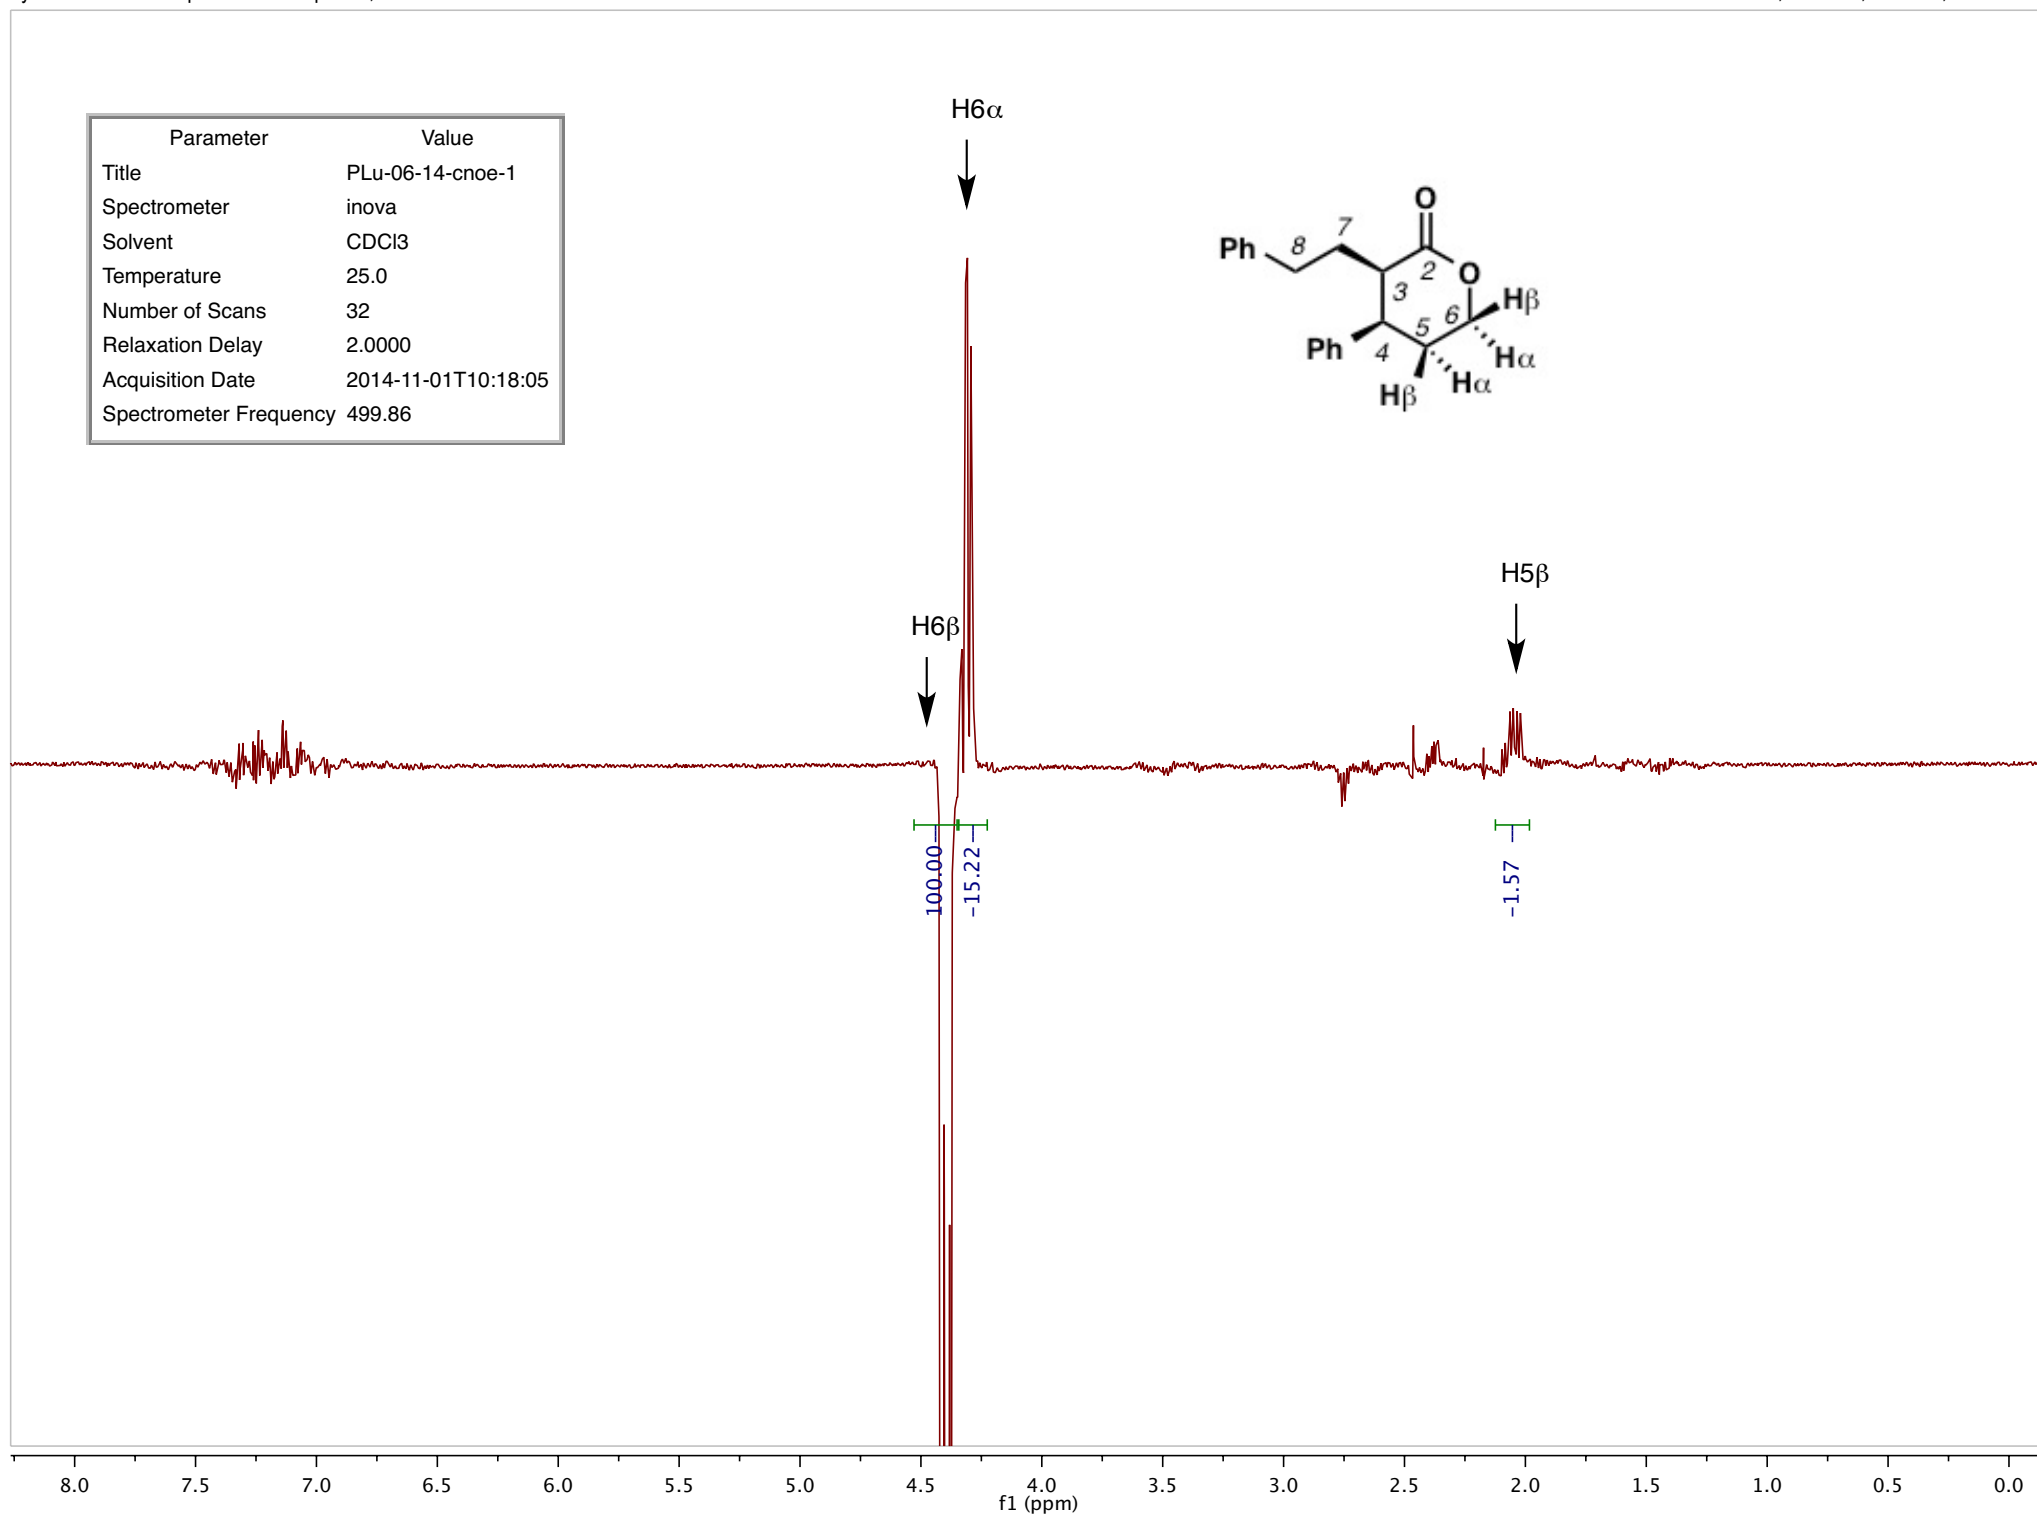

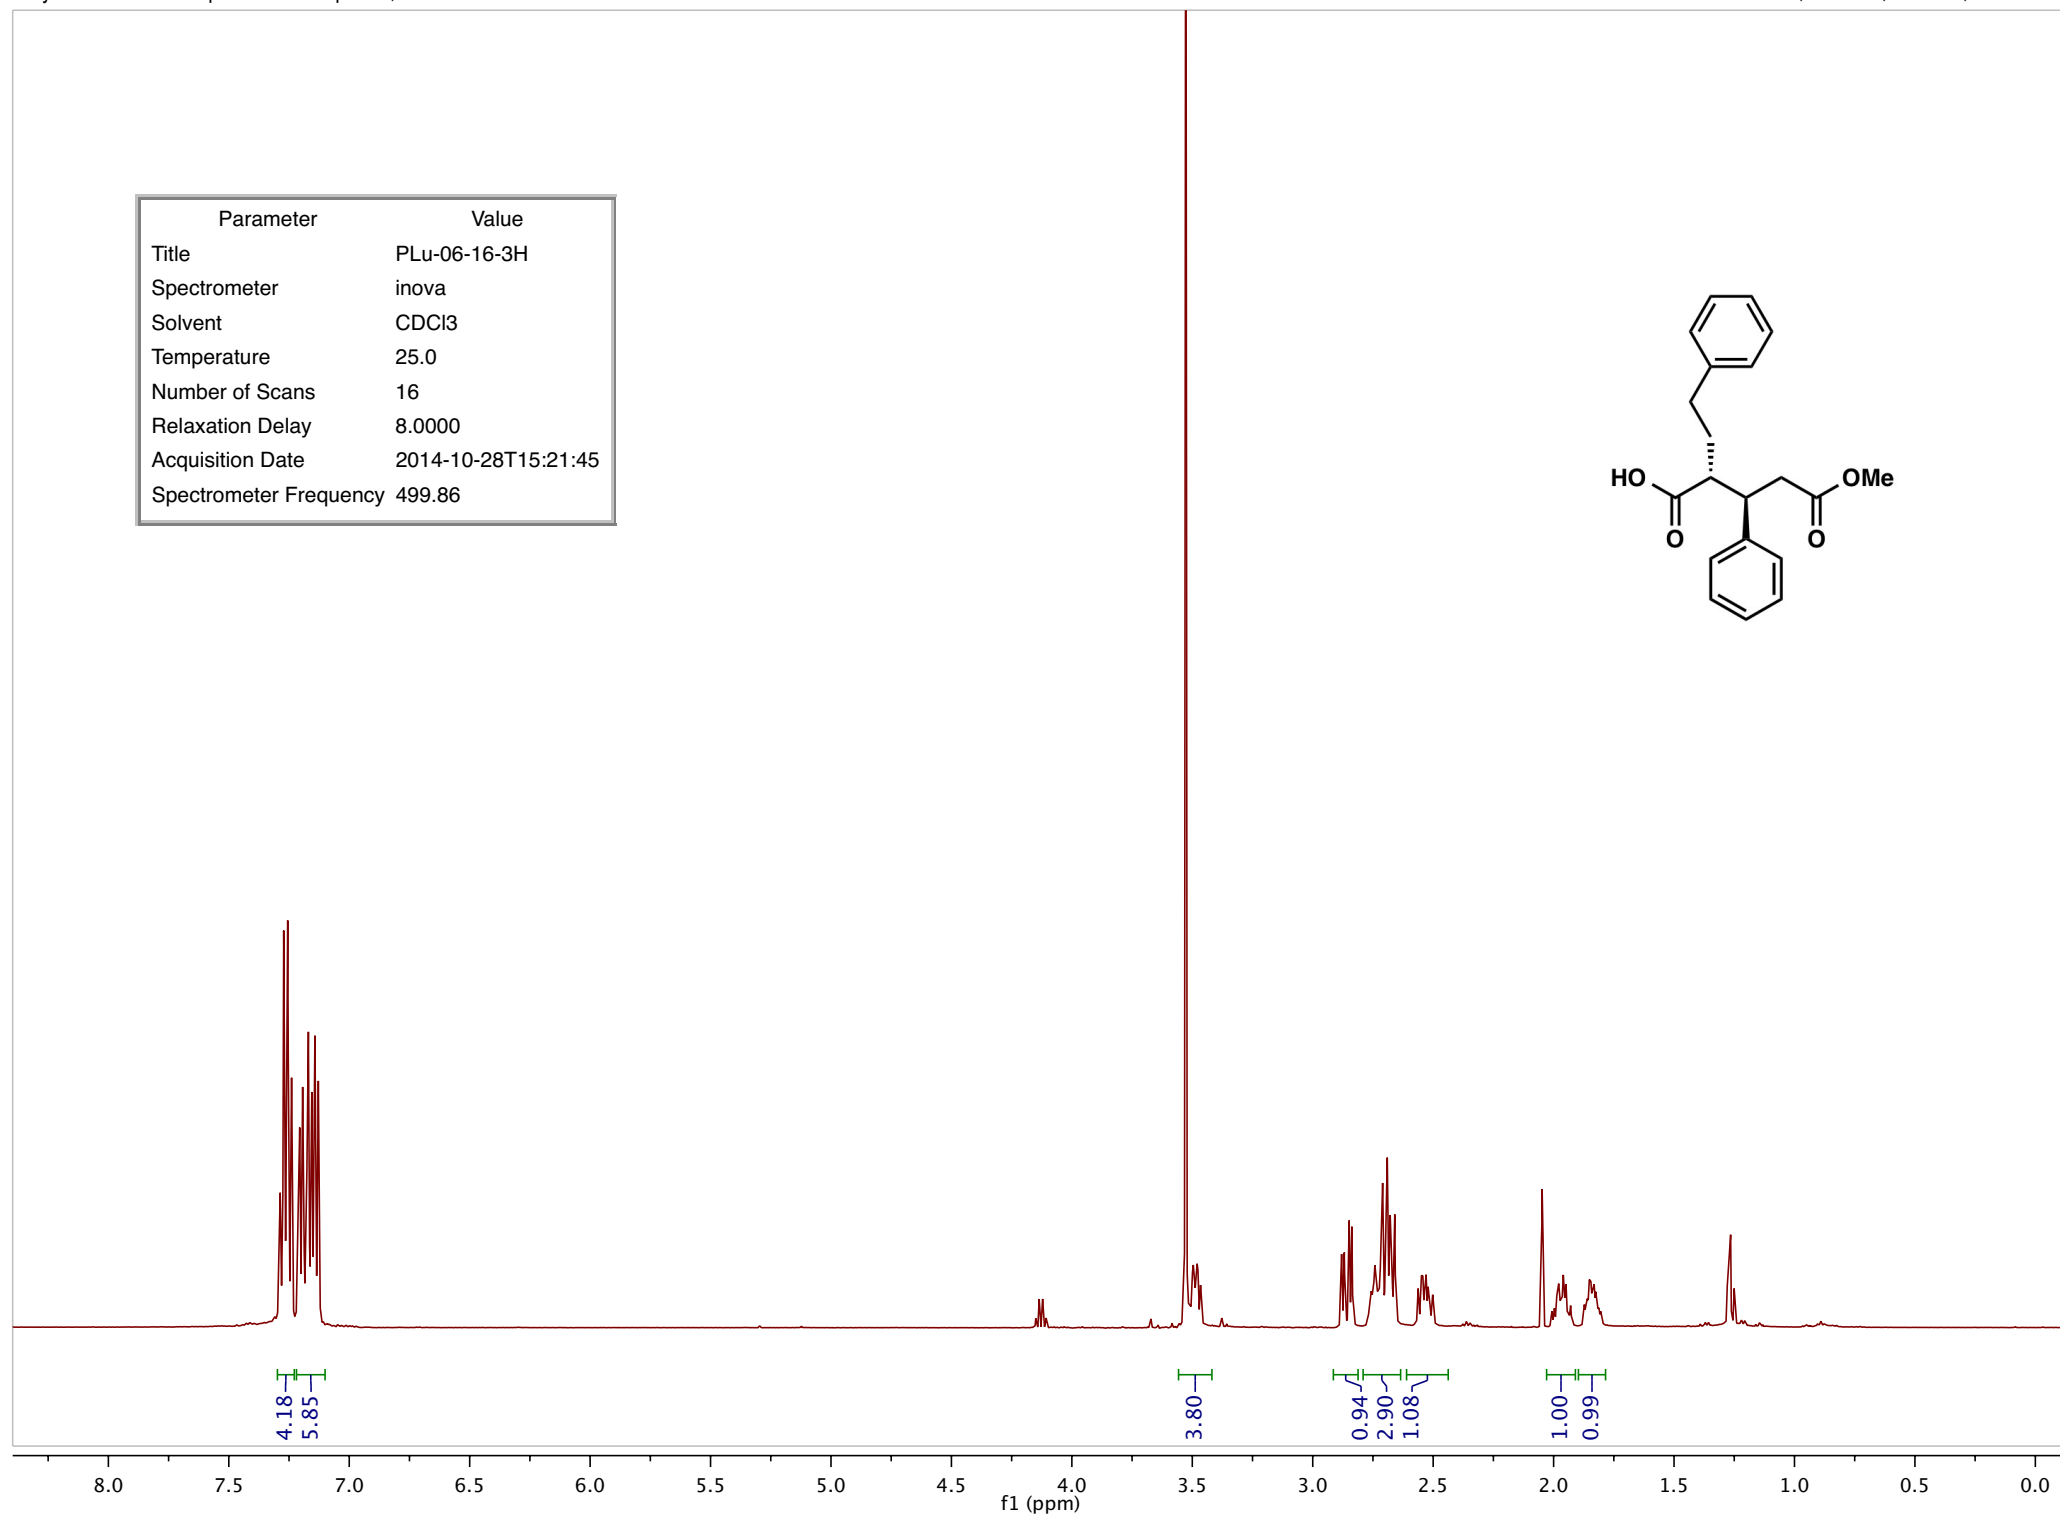

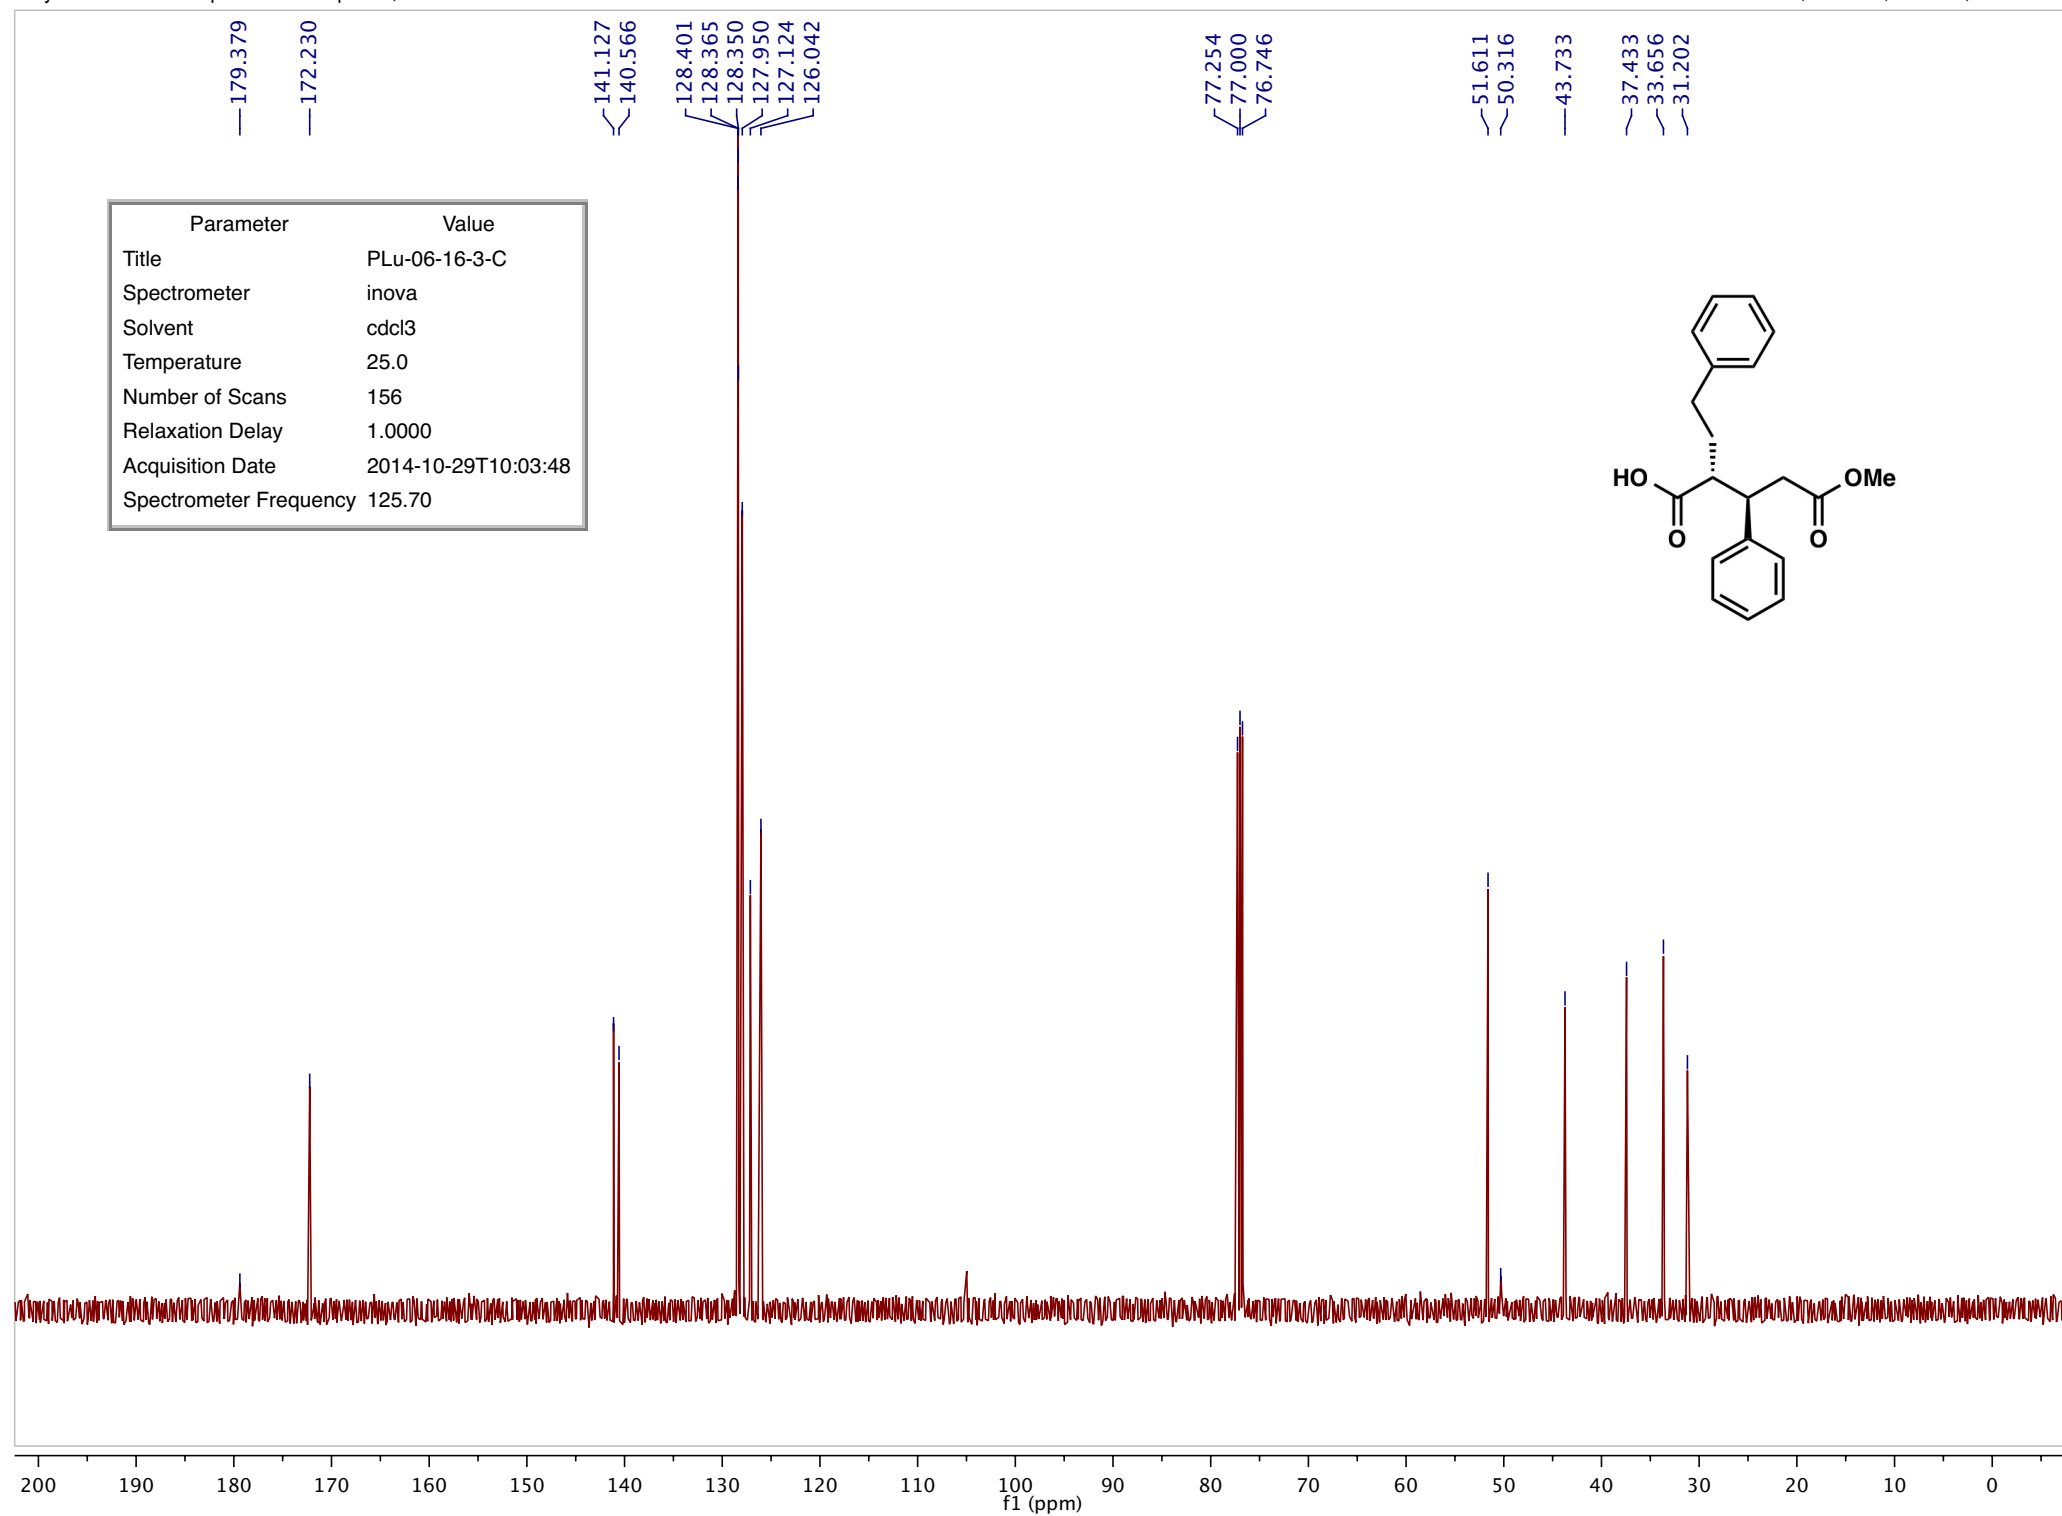

| Parameter              | Value               |
|------------------------|---------------------|
| Title                  | PLu-05-225-5H       |
| Spectrometer           | inova               |
| Solvent                | CDCl3               |
| Temperature            | 25.0                |
| Number of Scans        | 16                  |
| Relaxation Delay       | 4.8000              |
| Acquisition Date       | 2014-08-28T19:20:40 |
| Spectrometer Frequency | 499.86              |

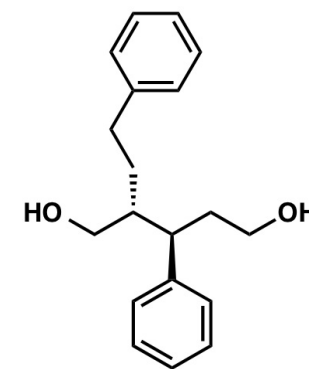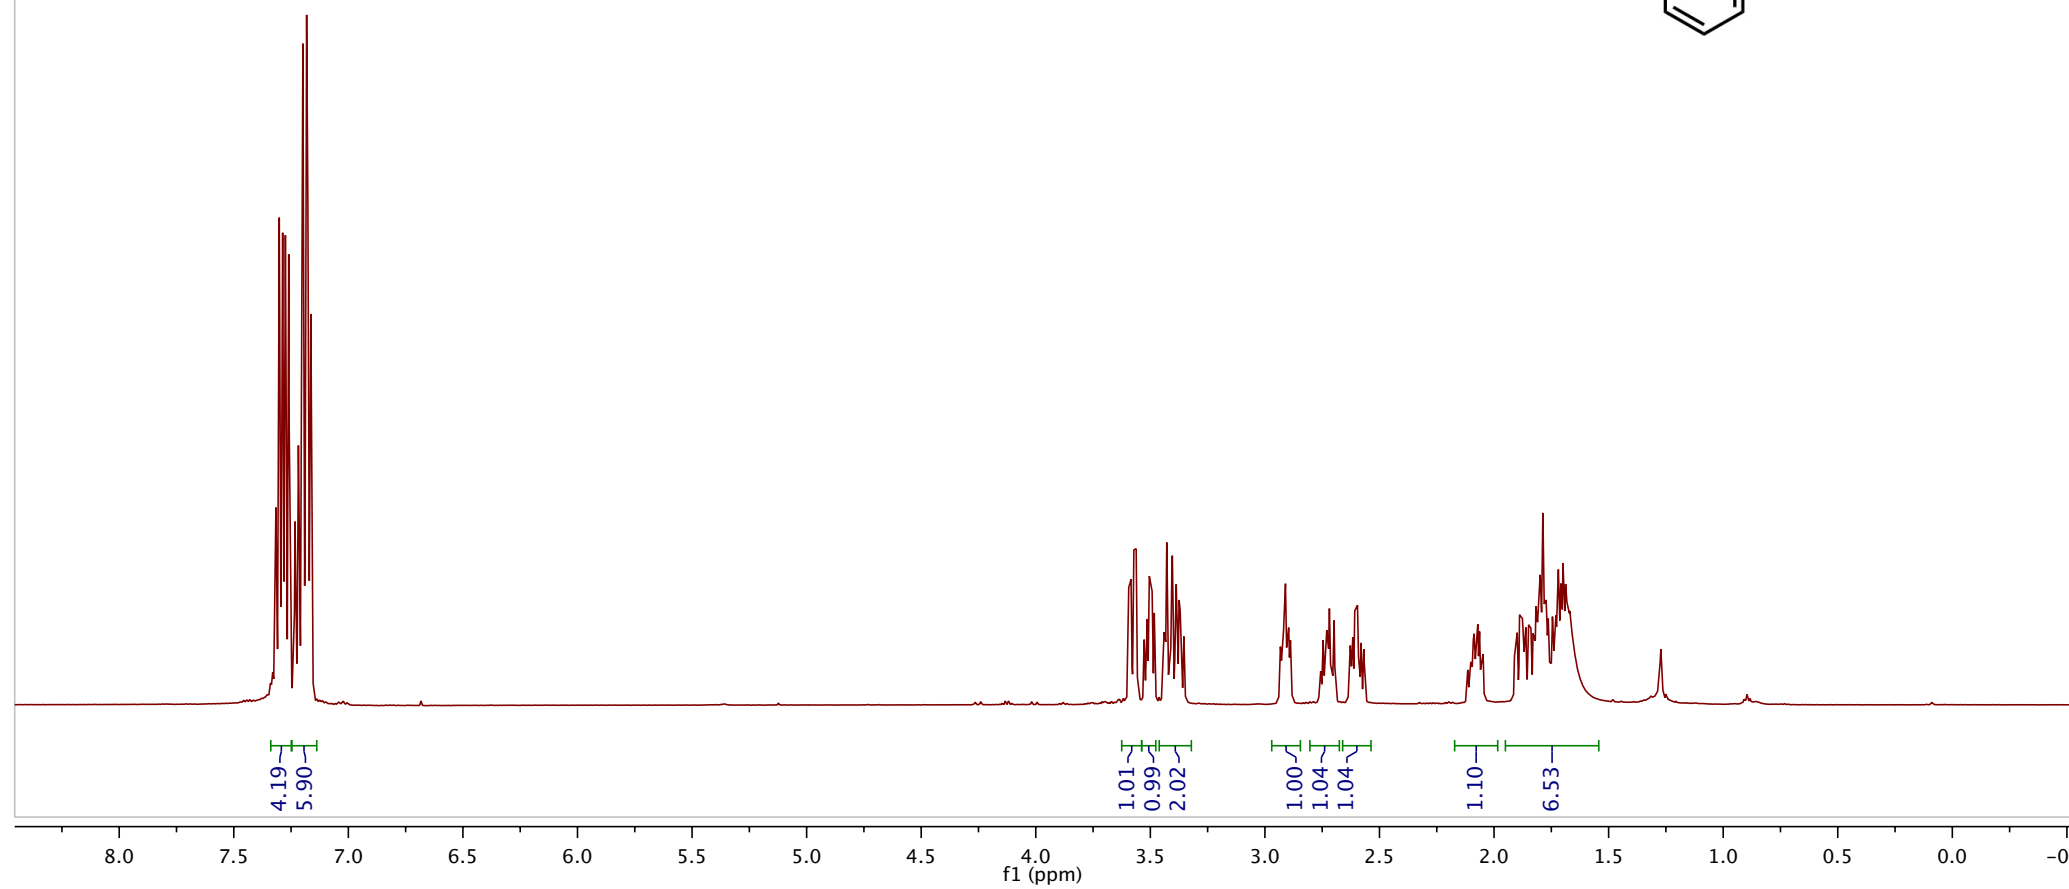

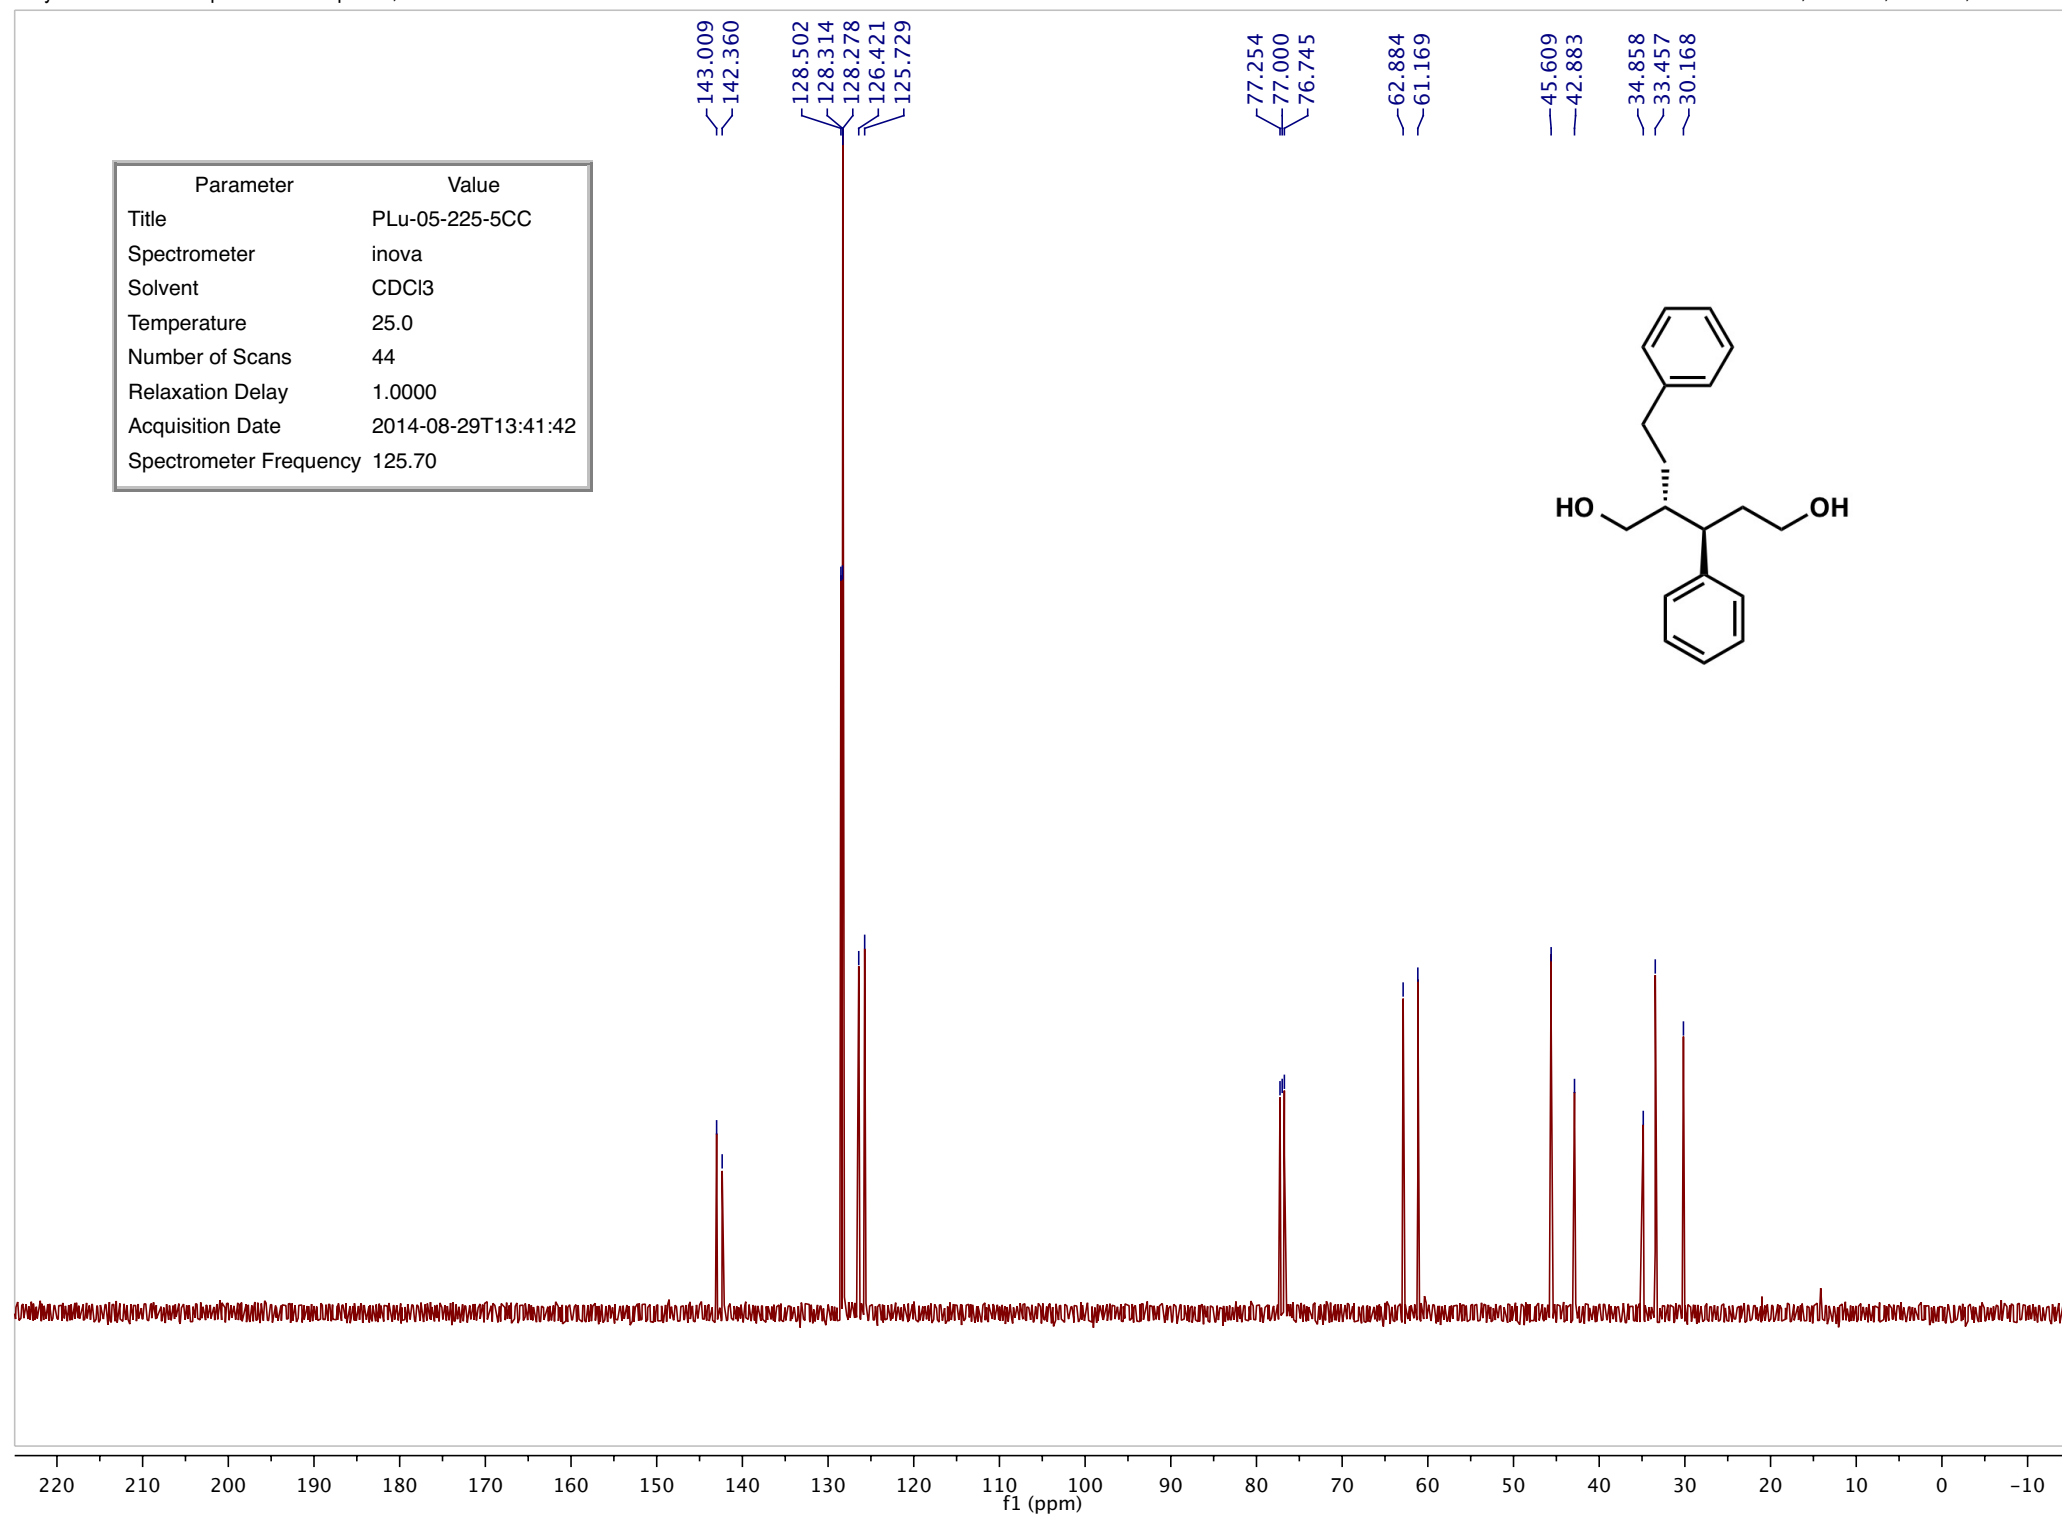

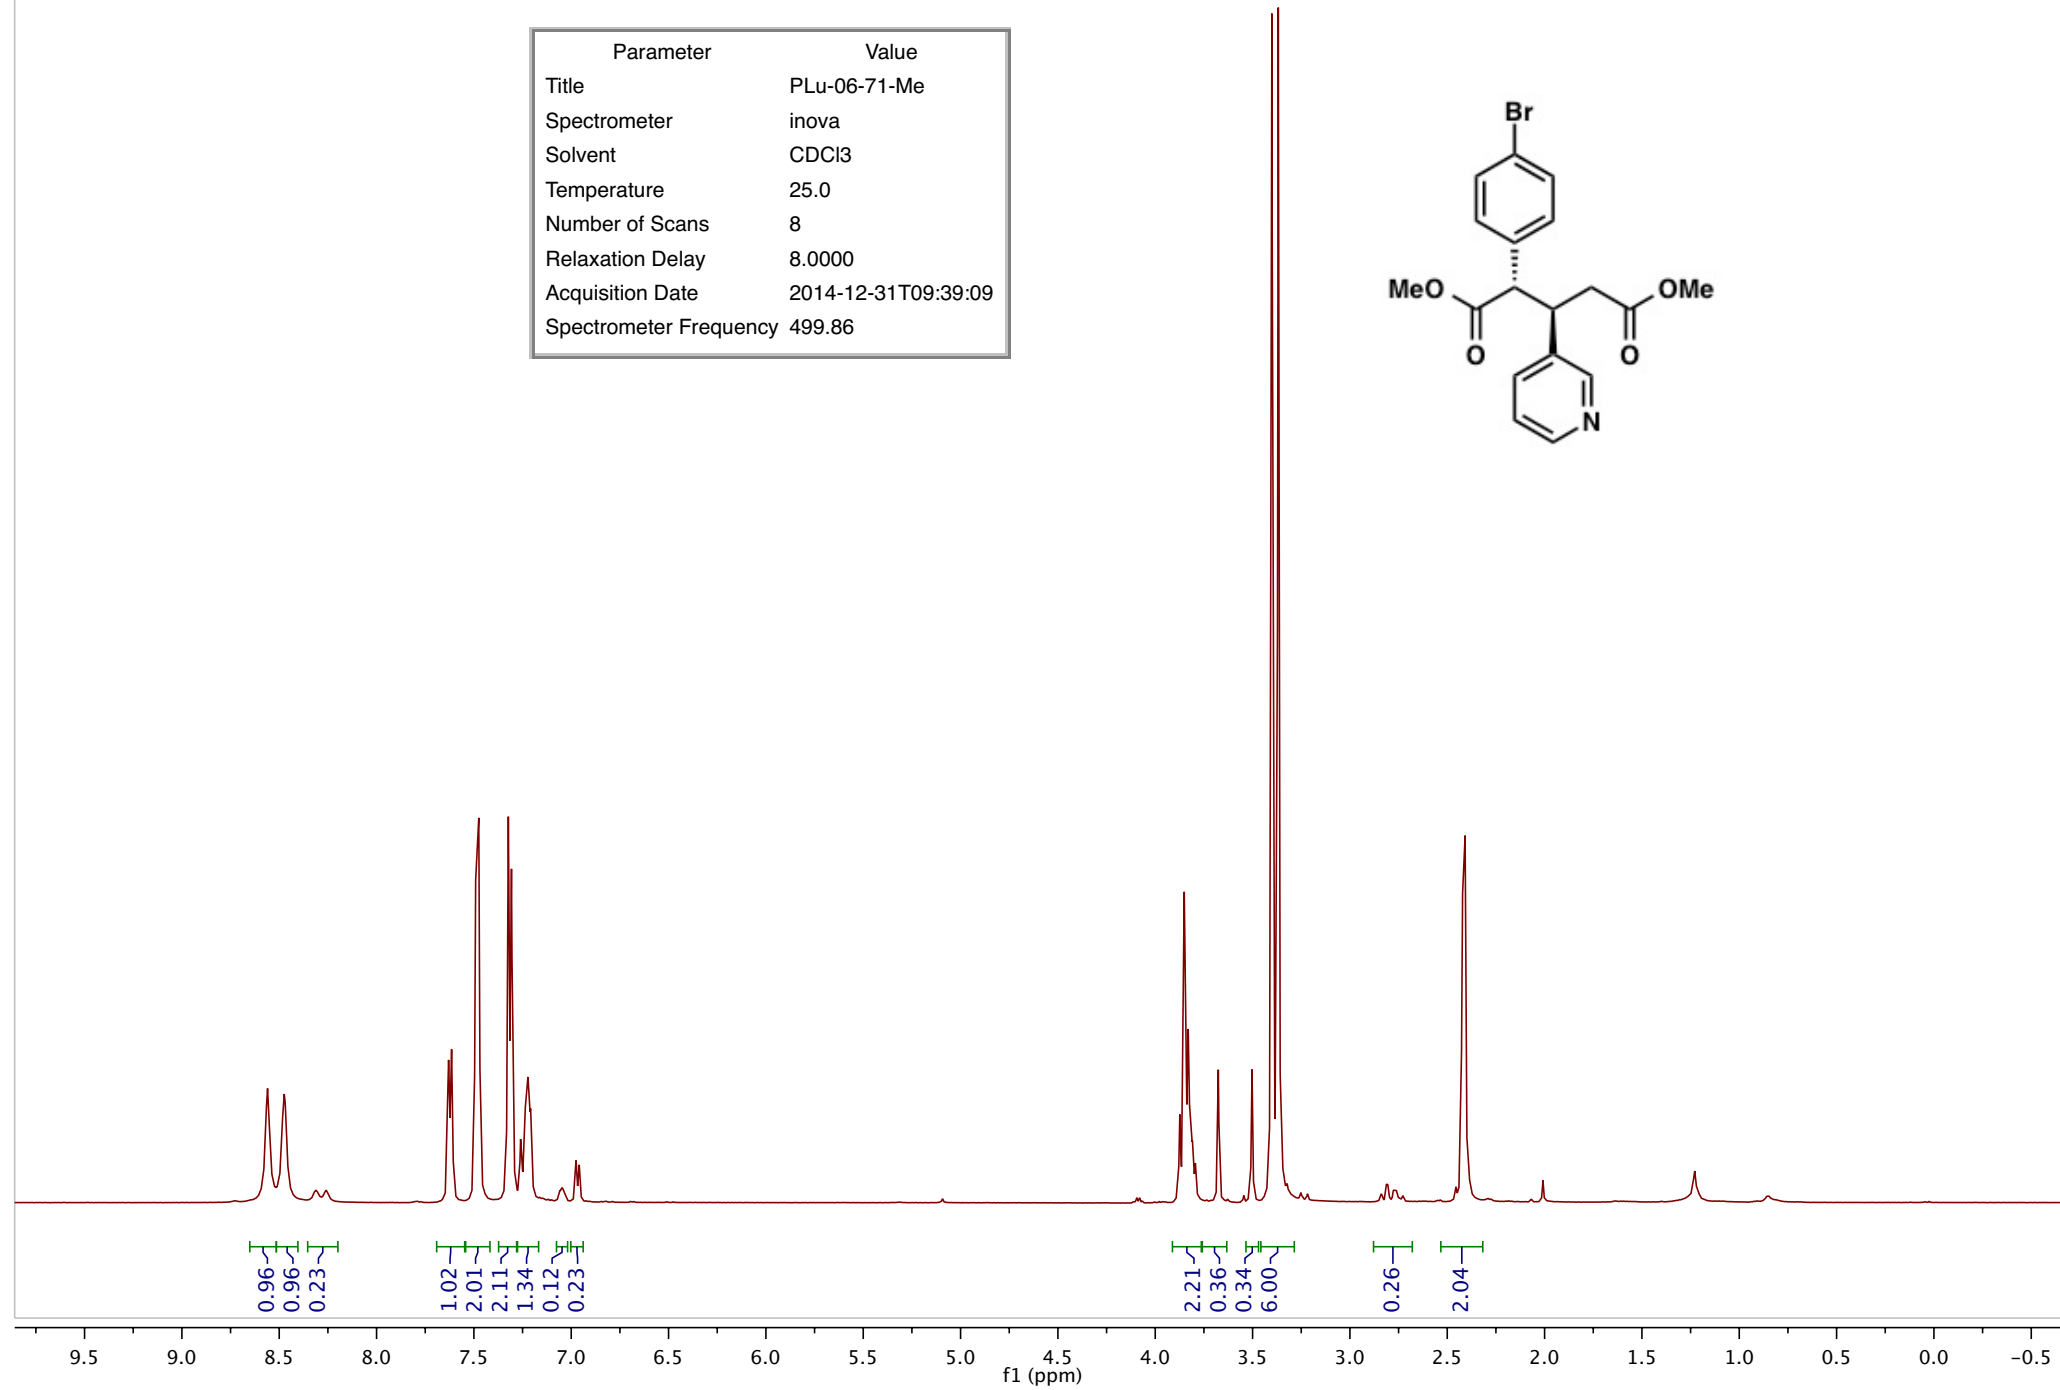

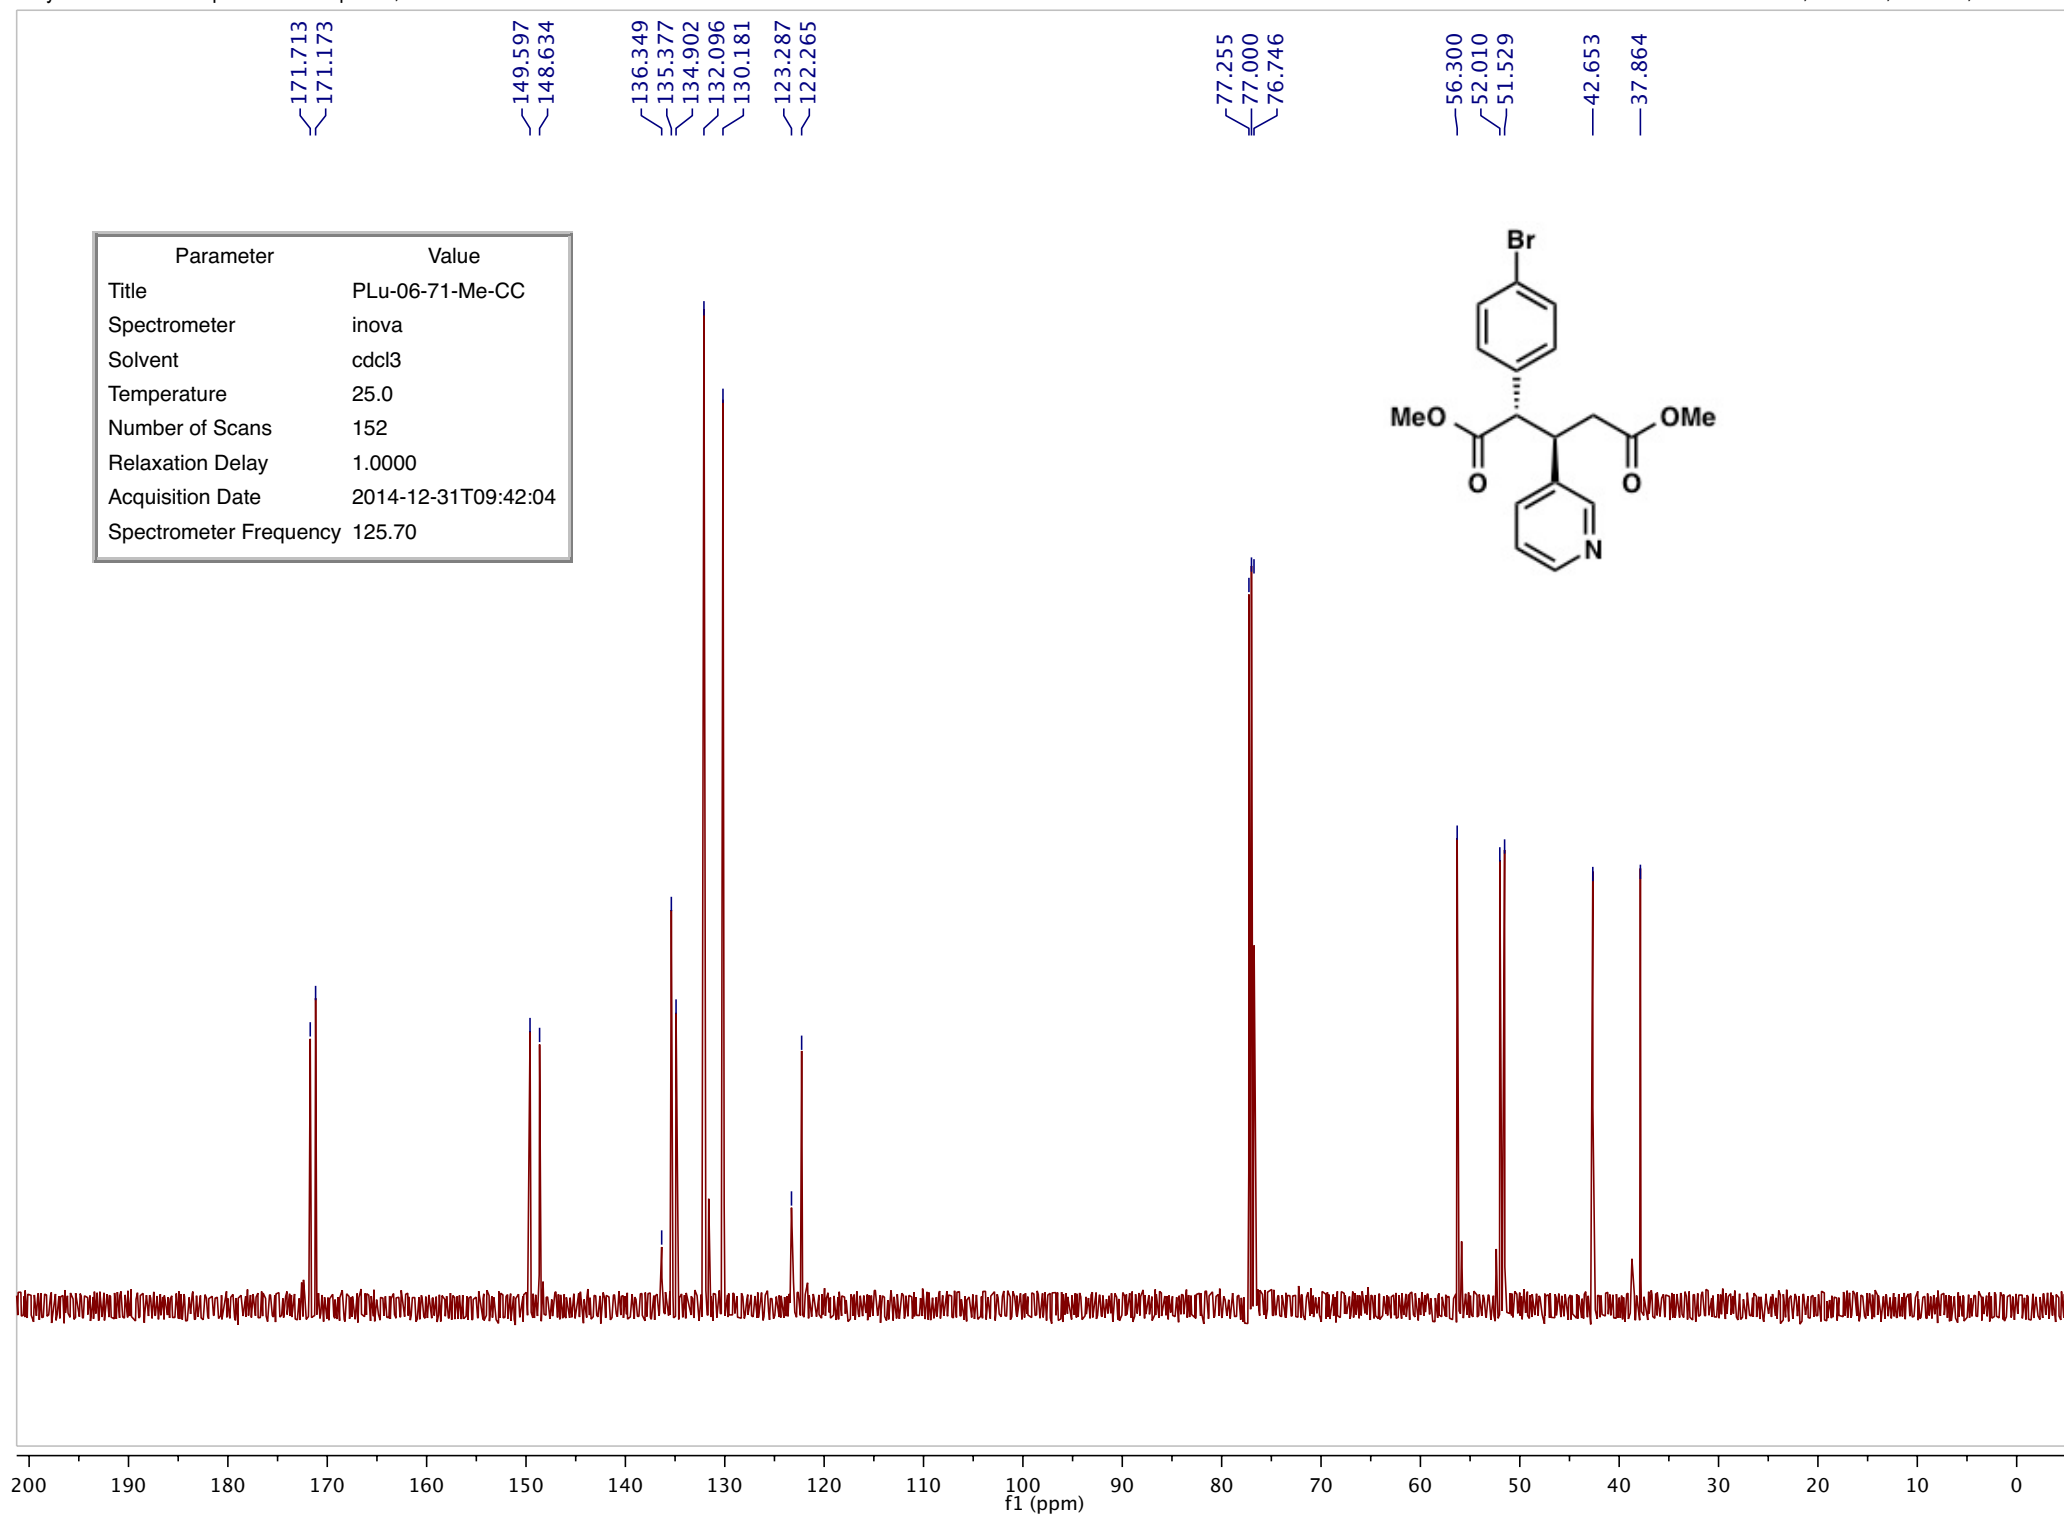



| Parameter              | Value               |
|------------------------|---------------------|
| Title                  | PLu-05-119-DMSO     |
| Spectrometer           | inova               |
| Solvent                | dmsO                |
| Temperature            | 25.0                |
| Number of Scans        | 16                  |
| Relaxation Delay       | 8.0000              |
| Acquisition Date       | 2014-09-20T17:37:01 |
| Spectrometer Frequency | 499.86              |

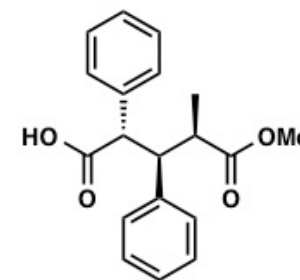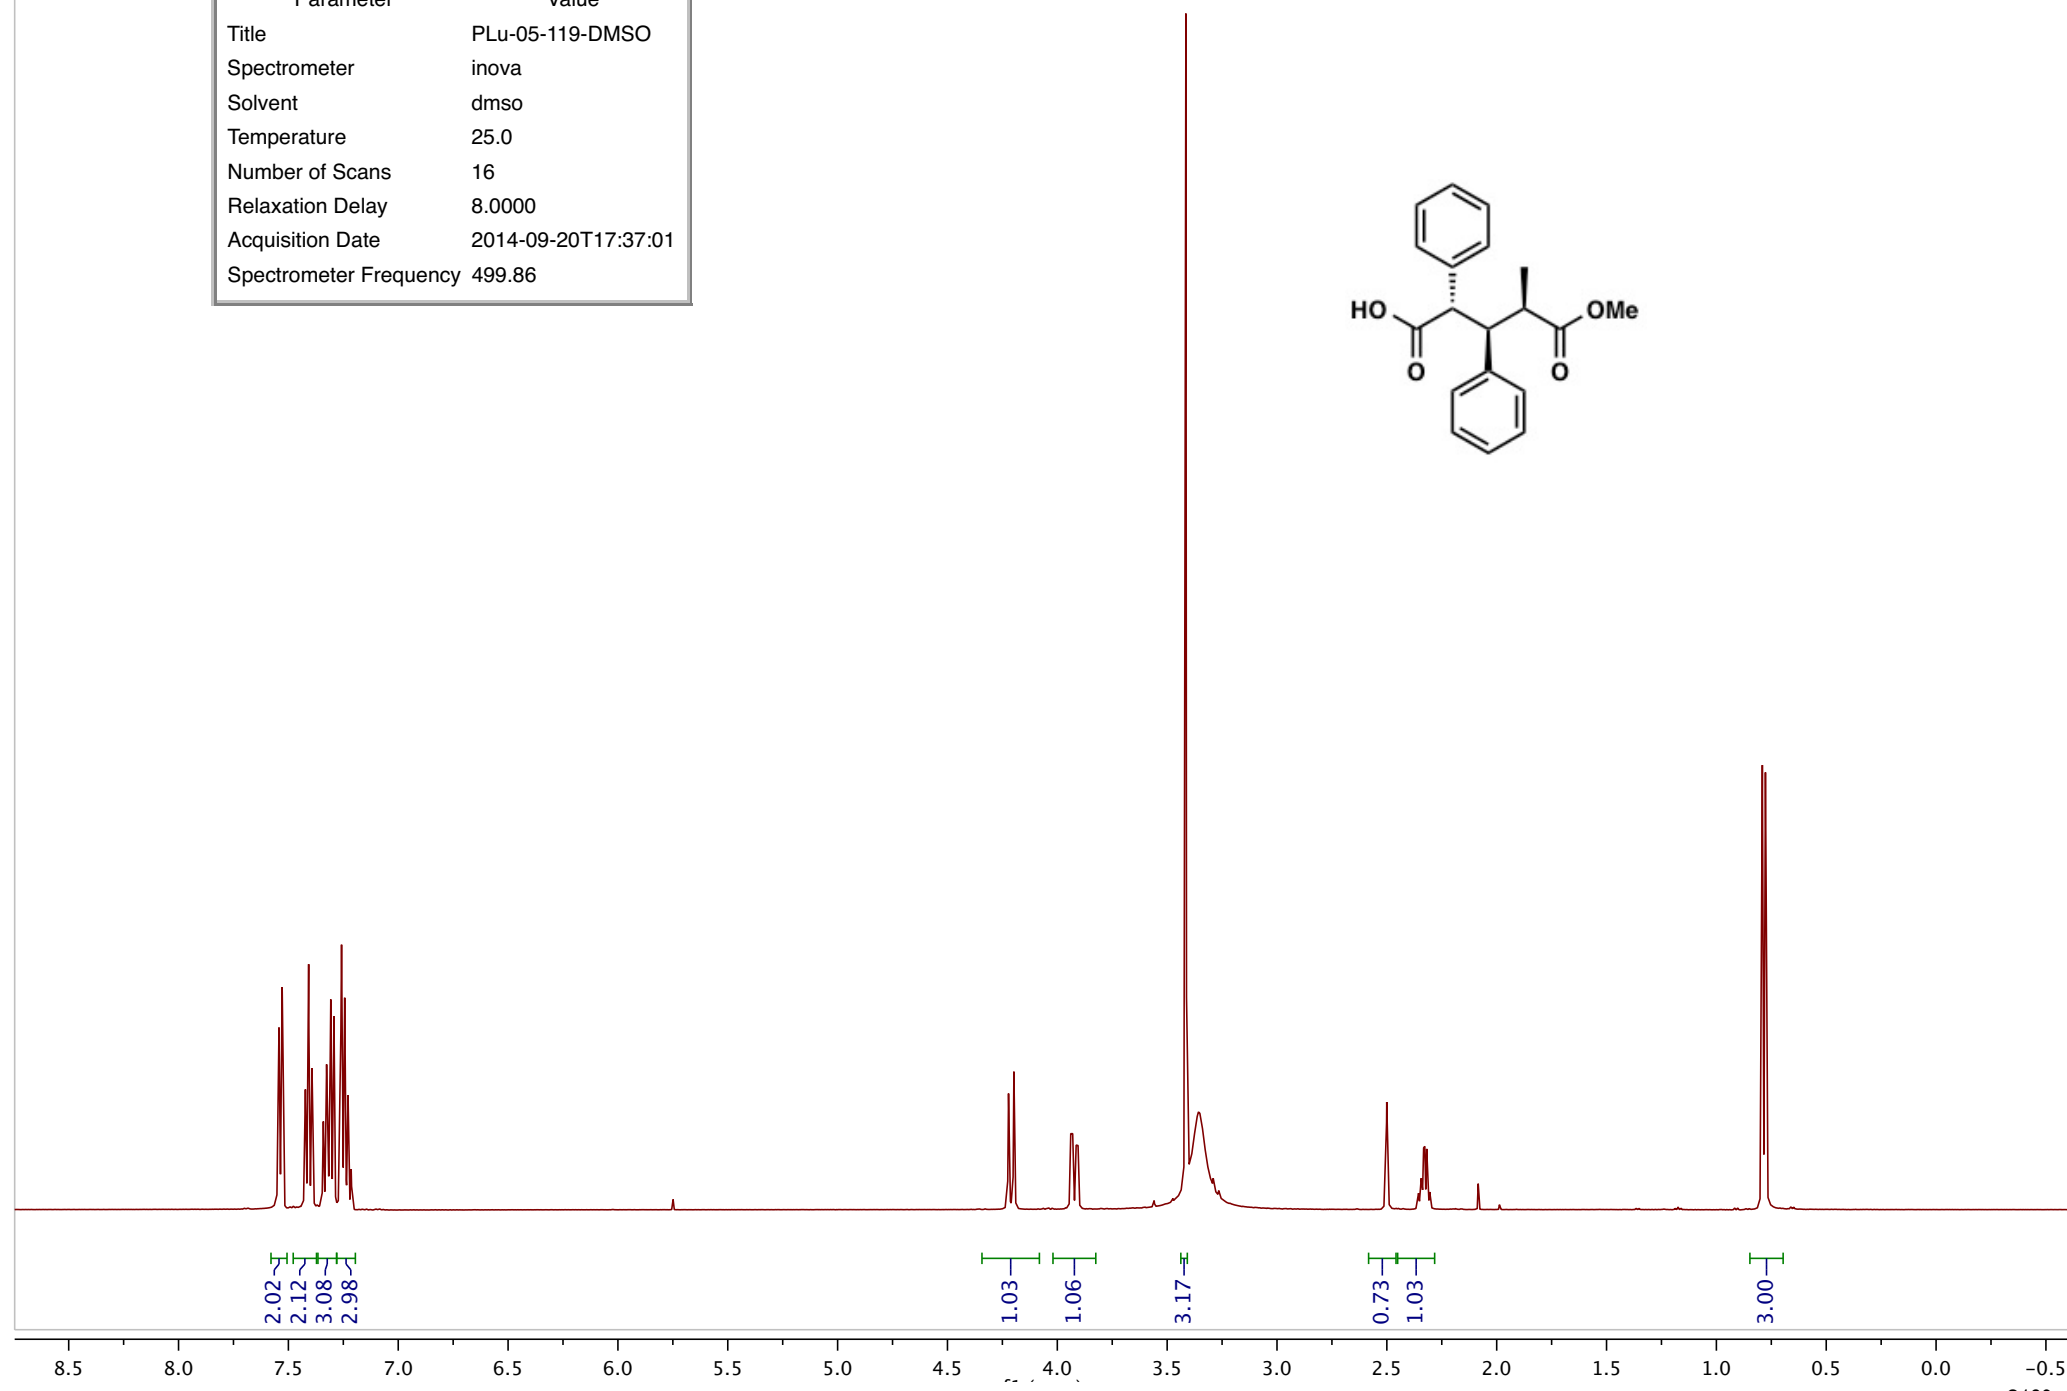

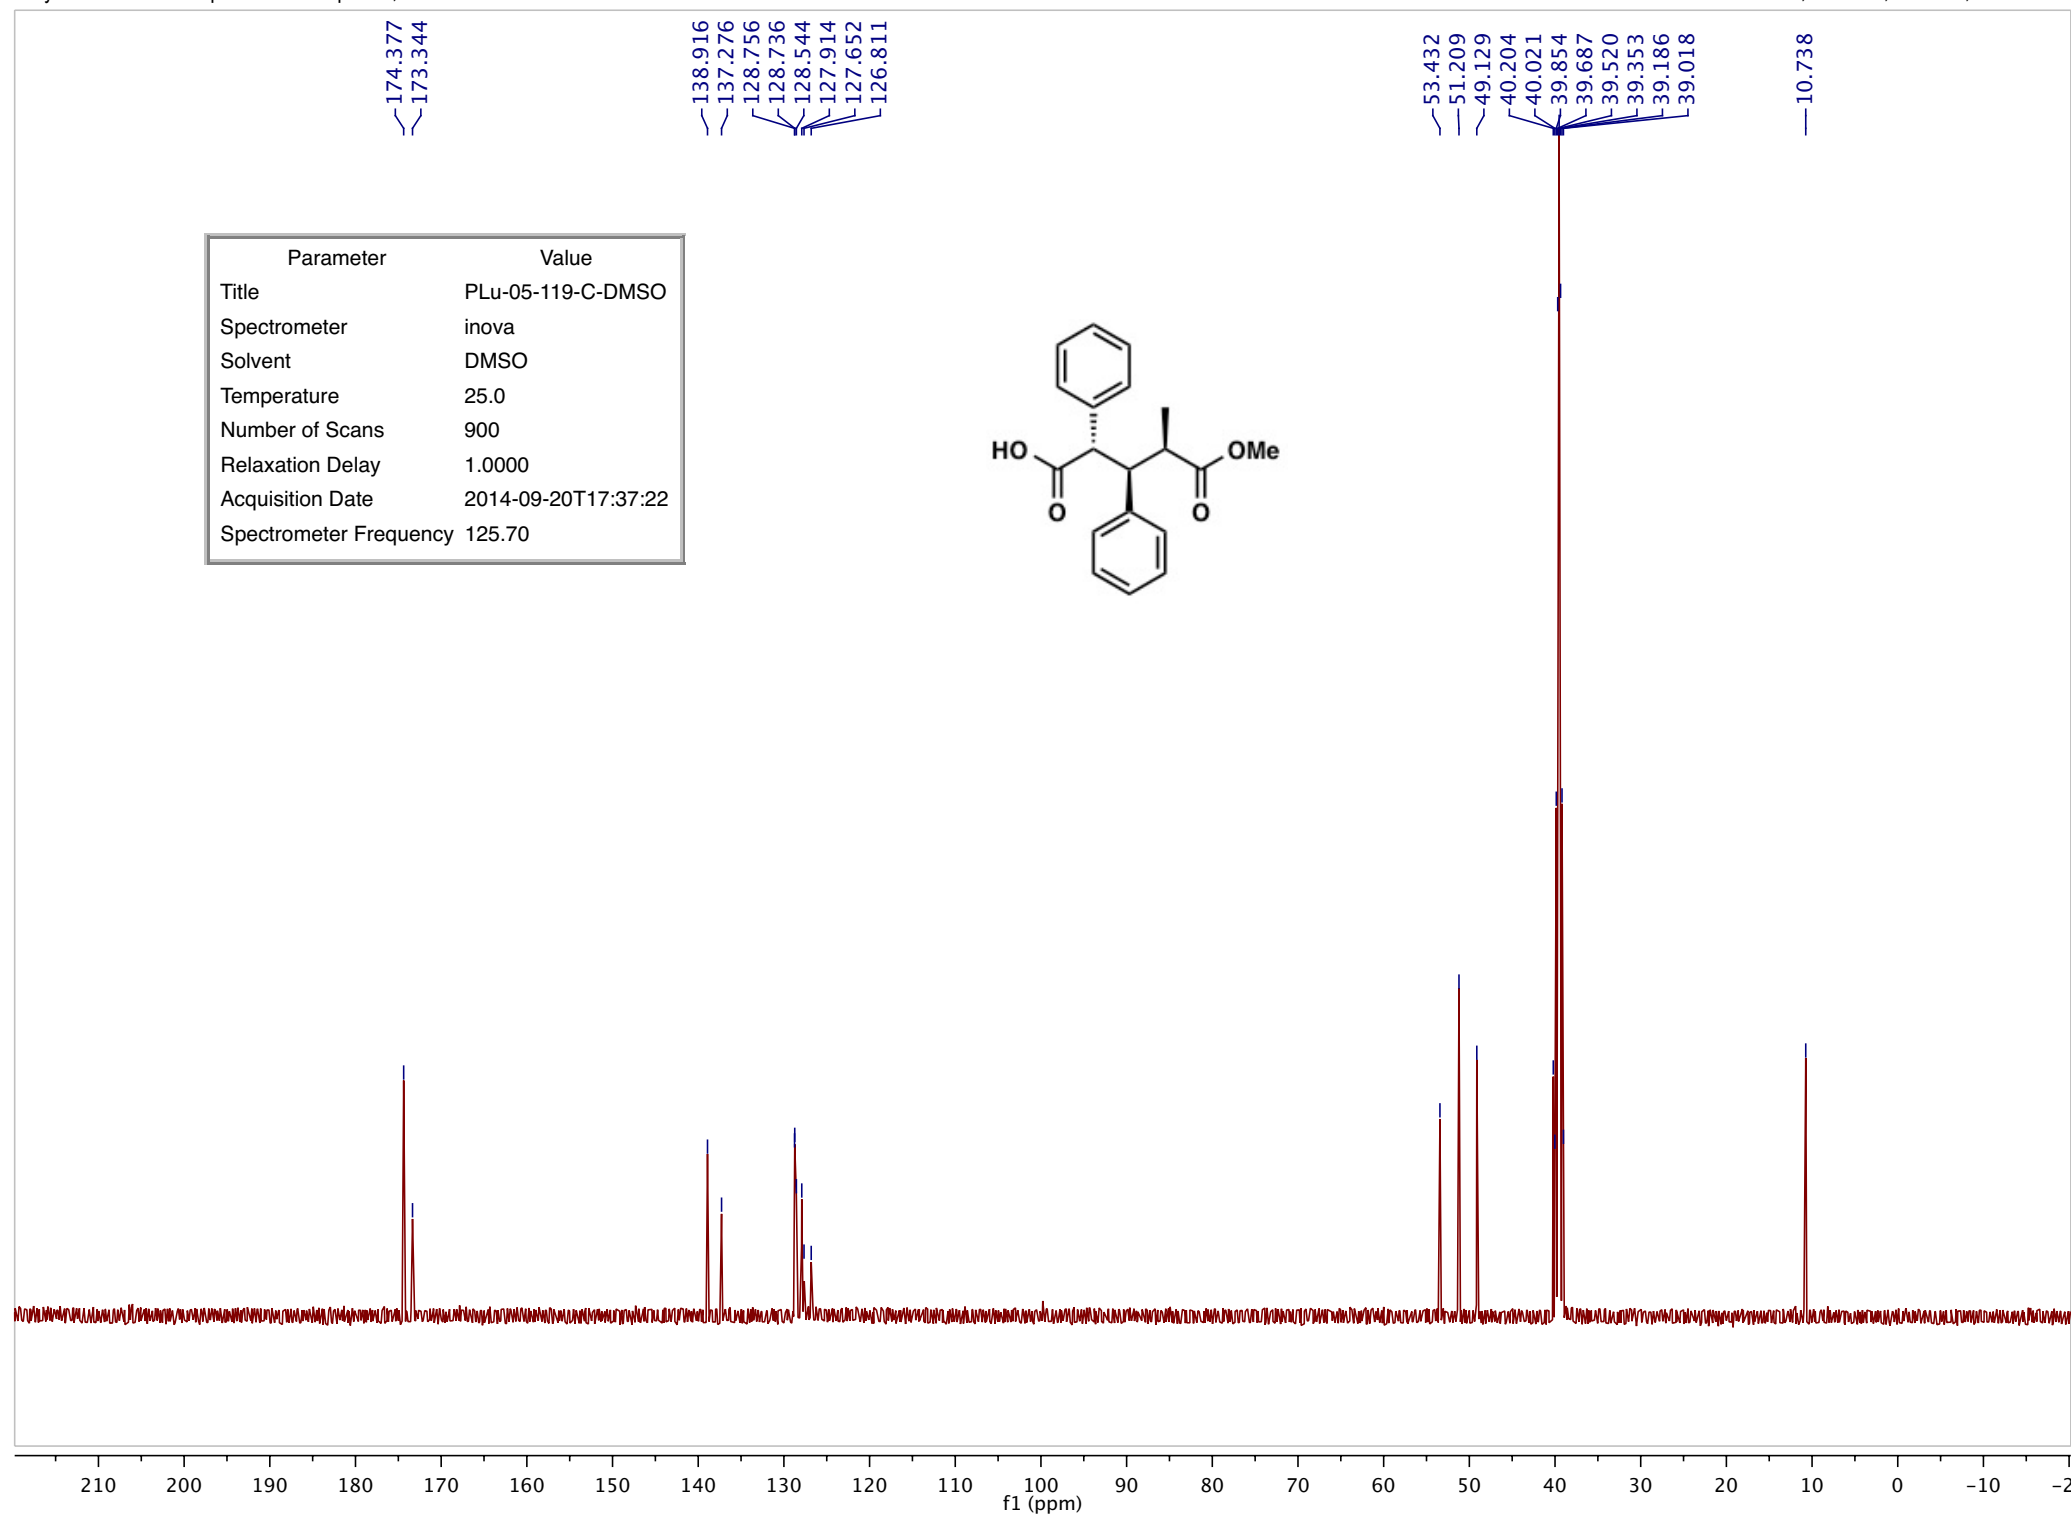

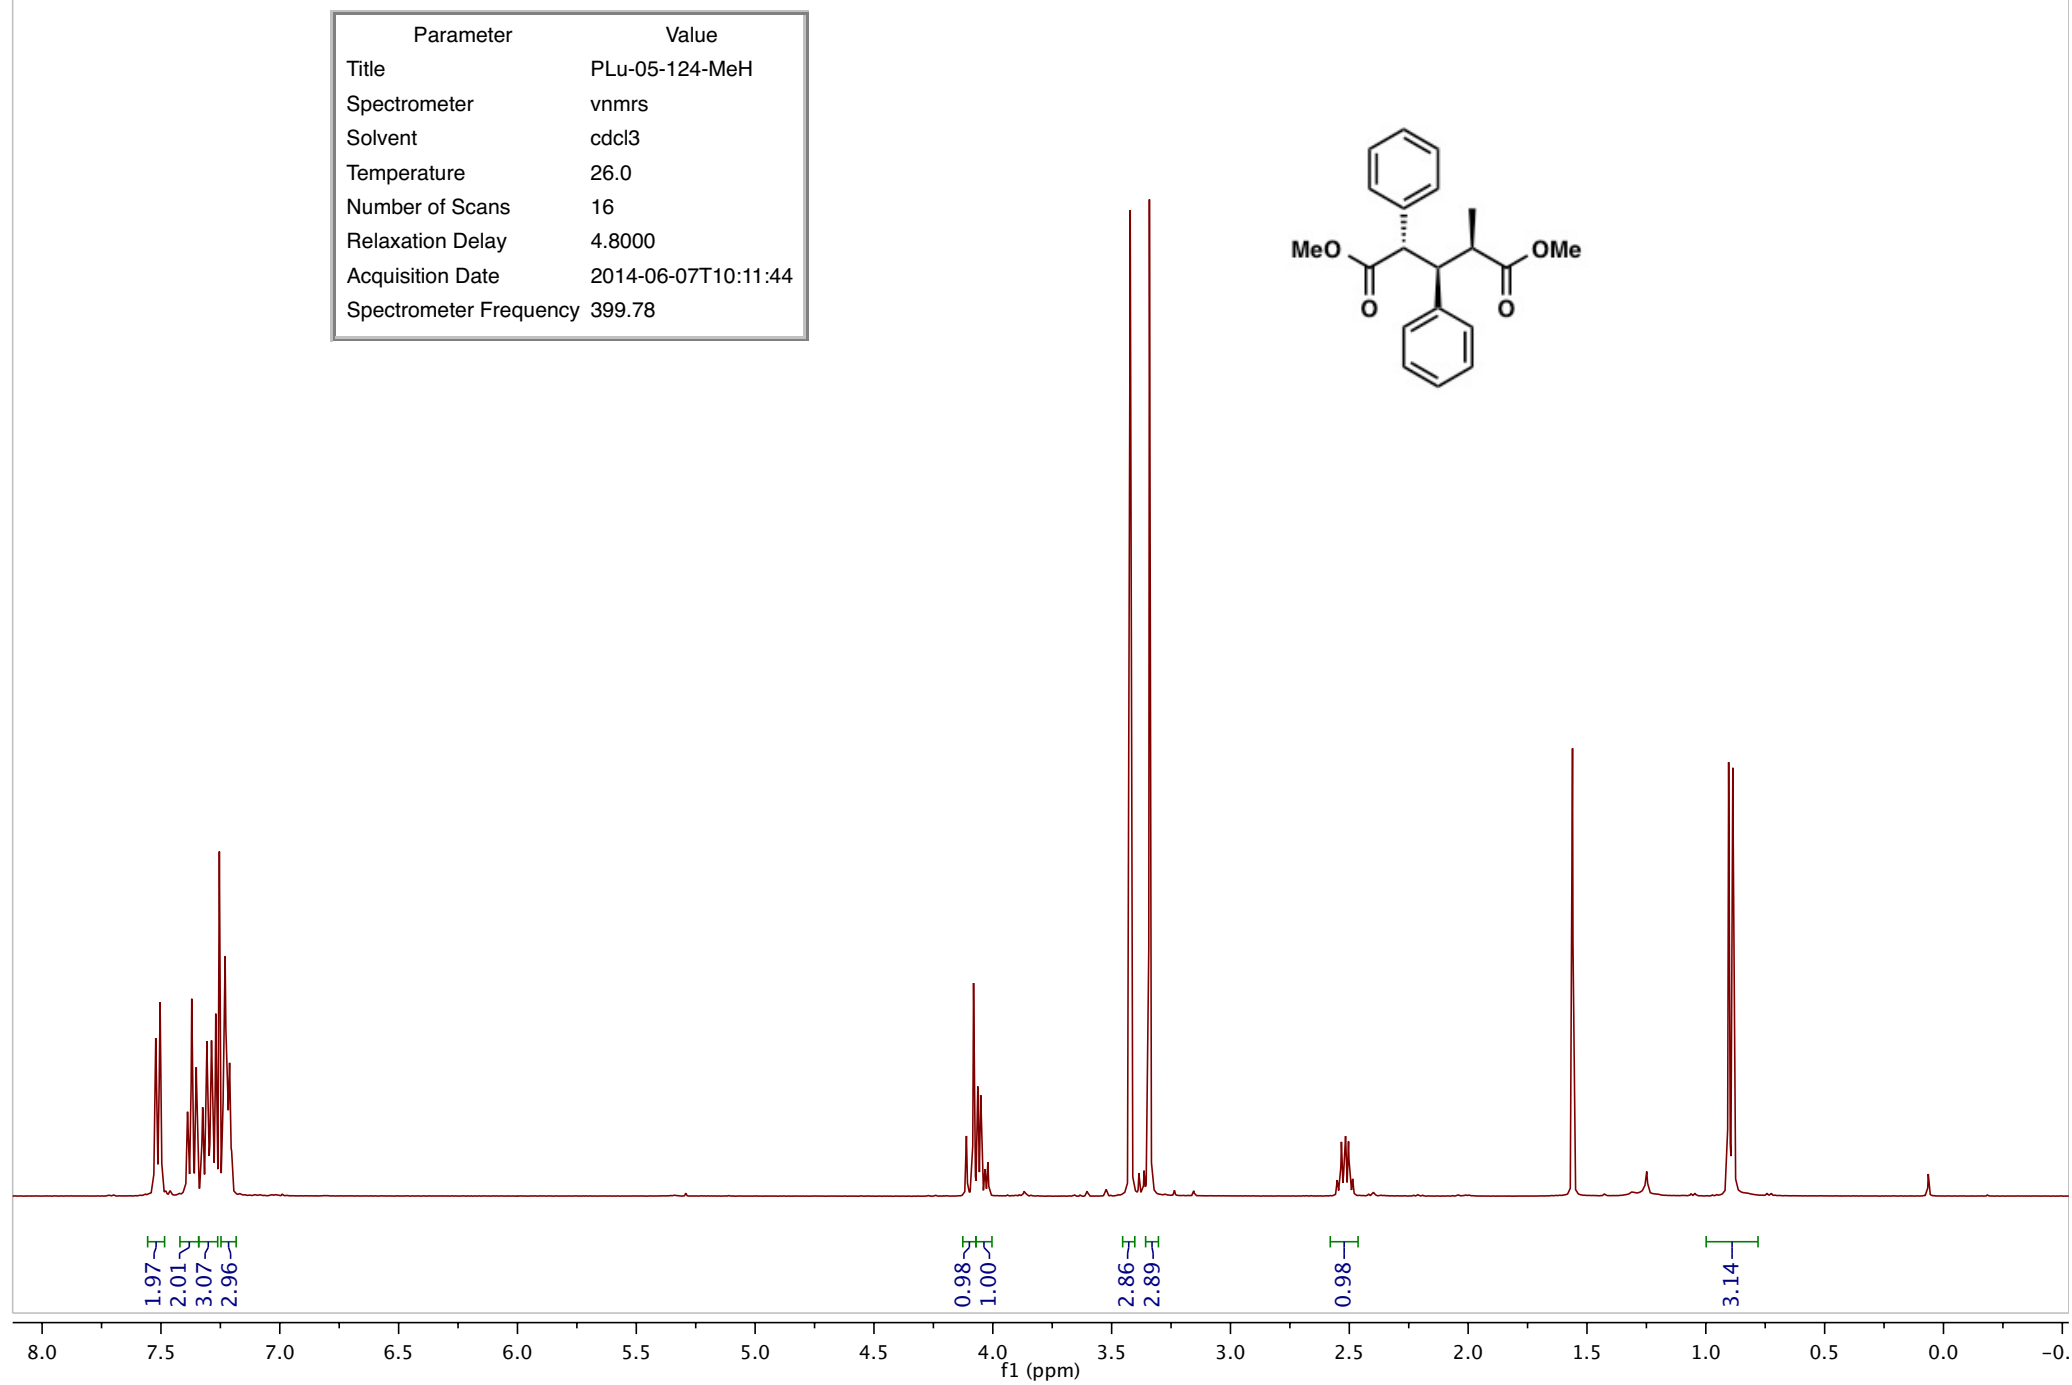

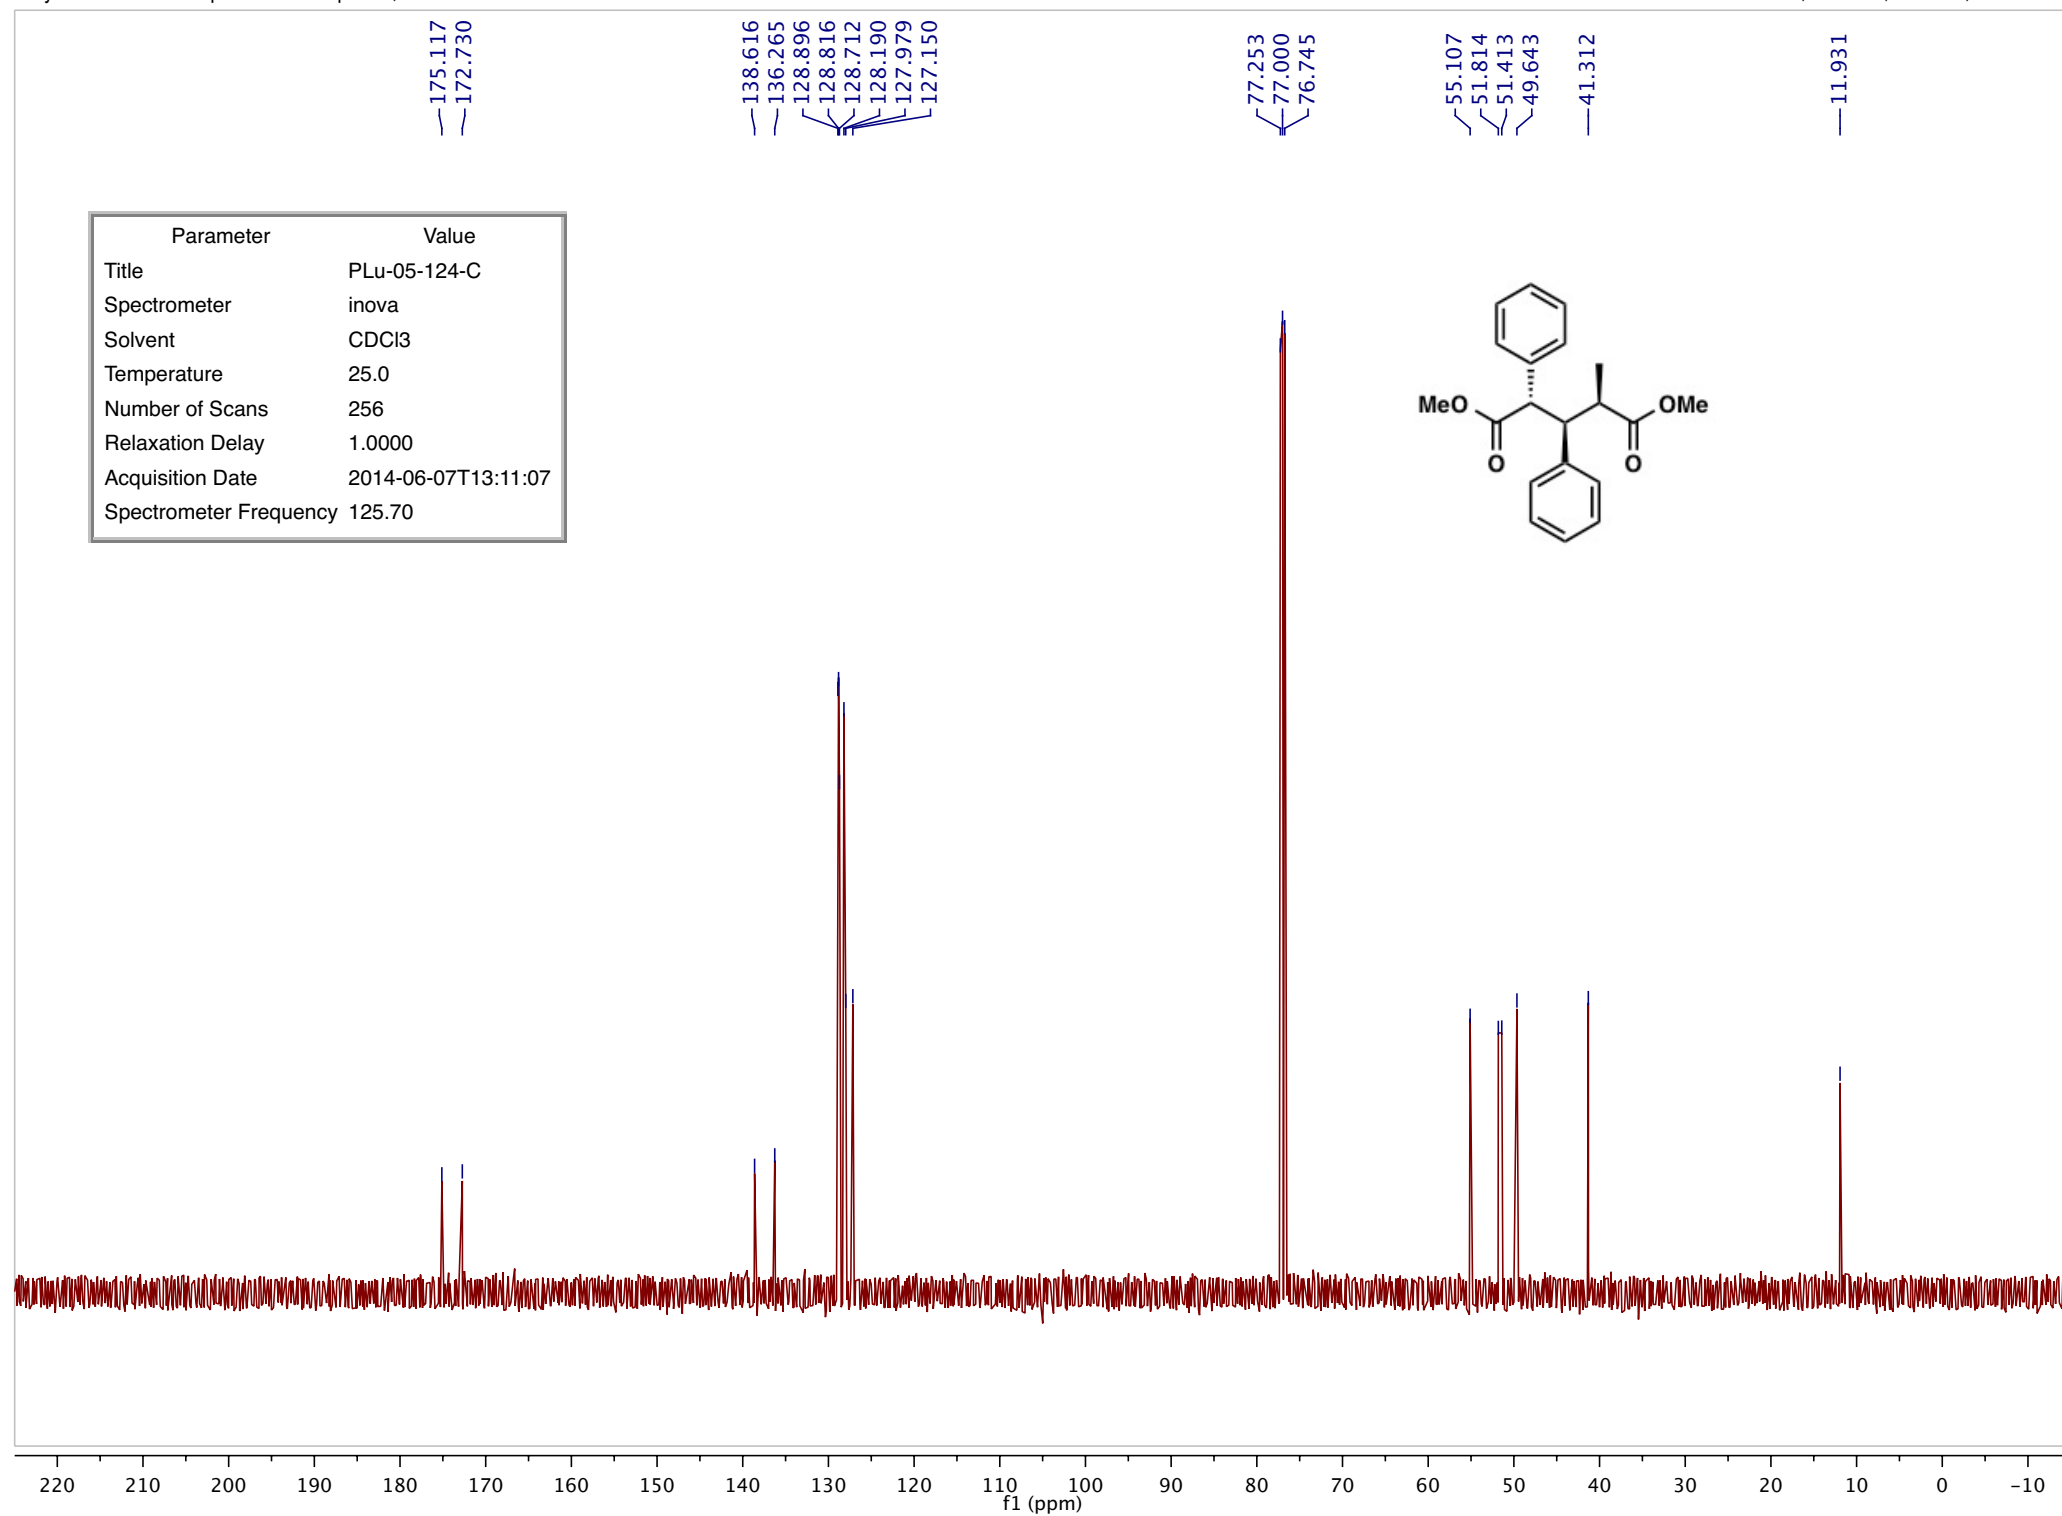

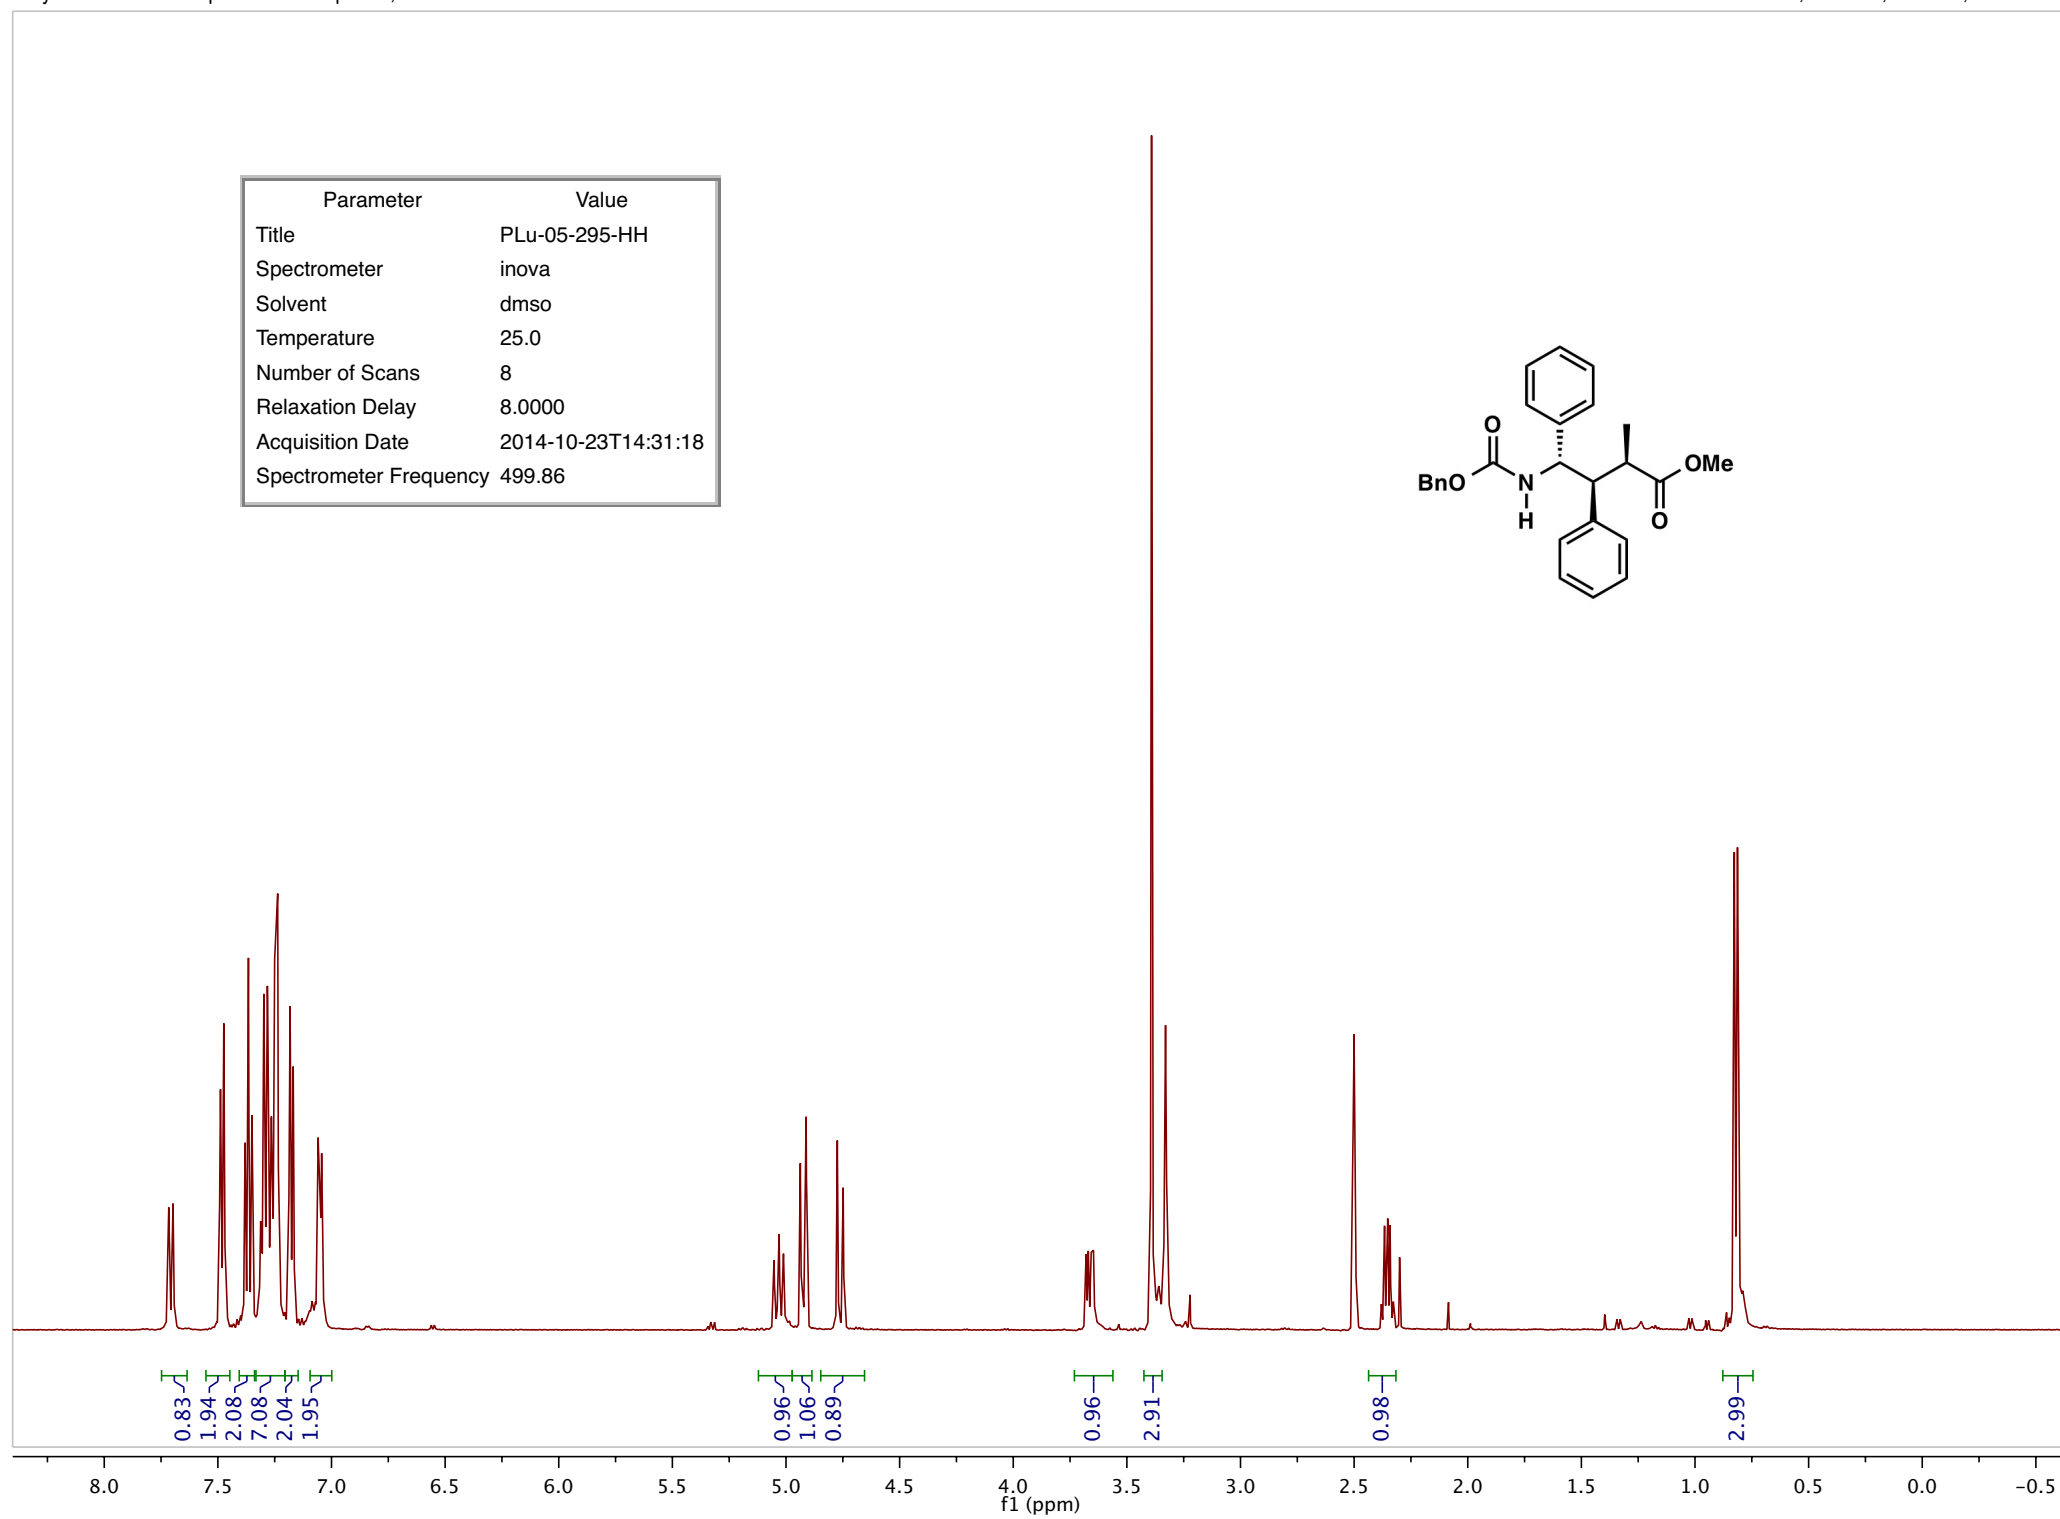

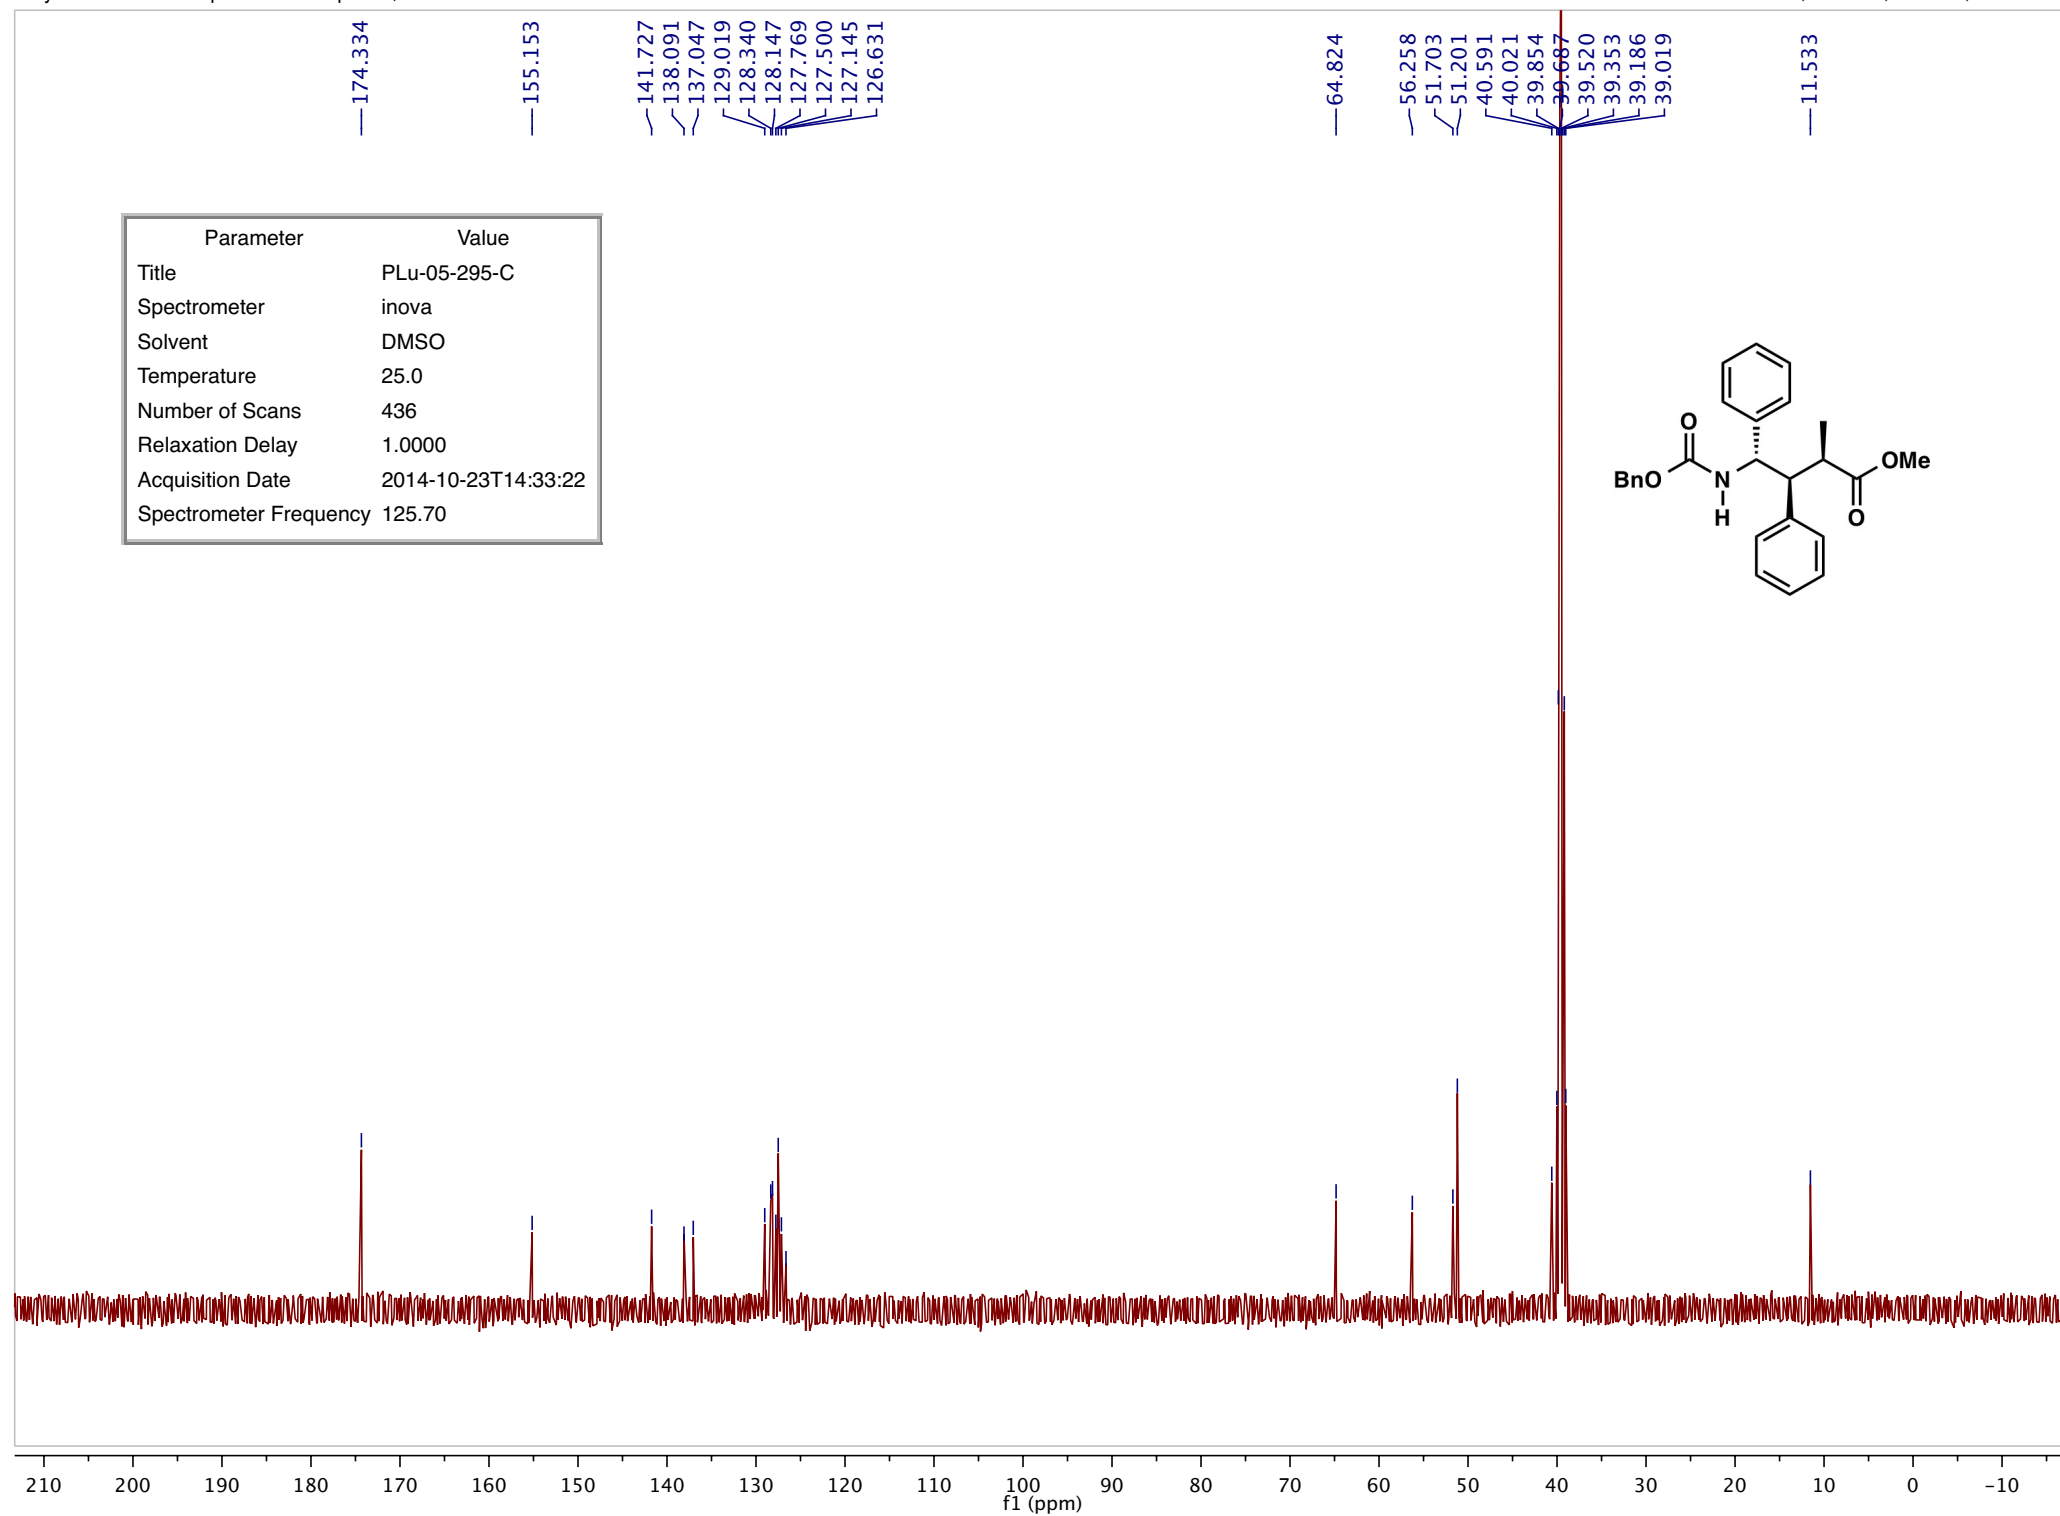

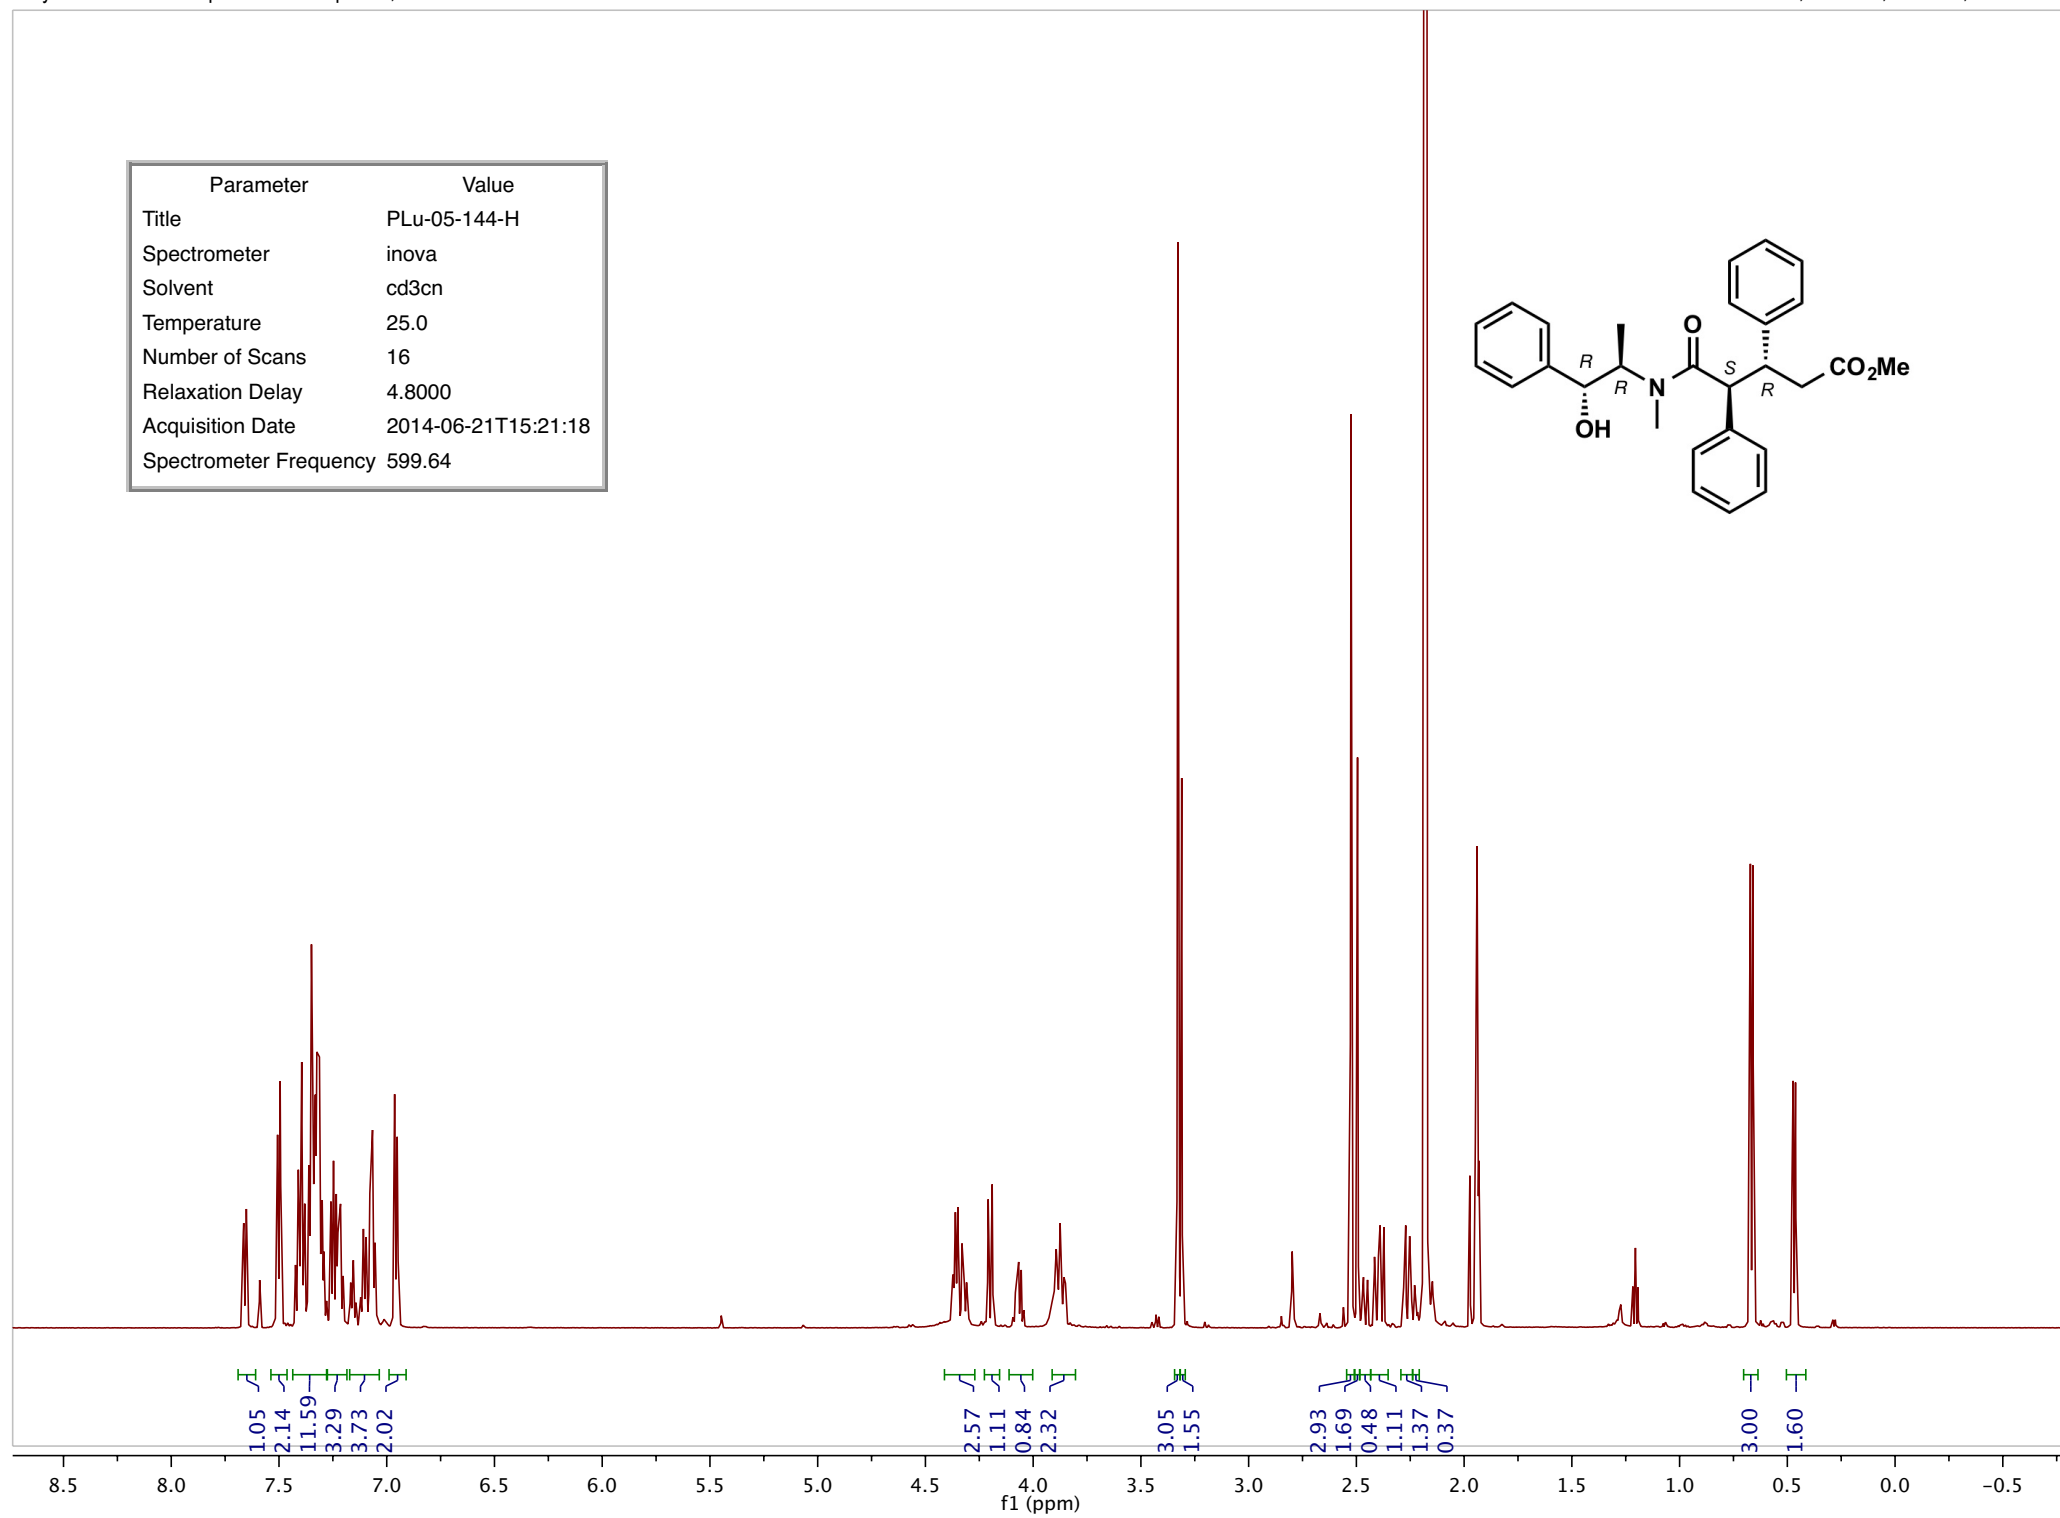

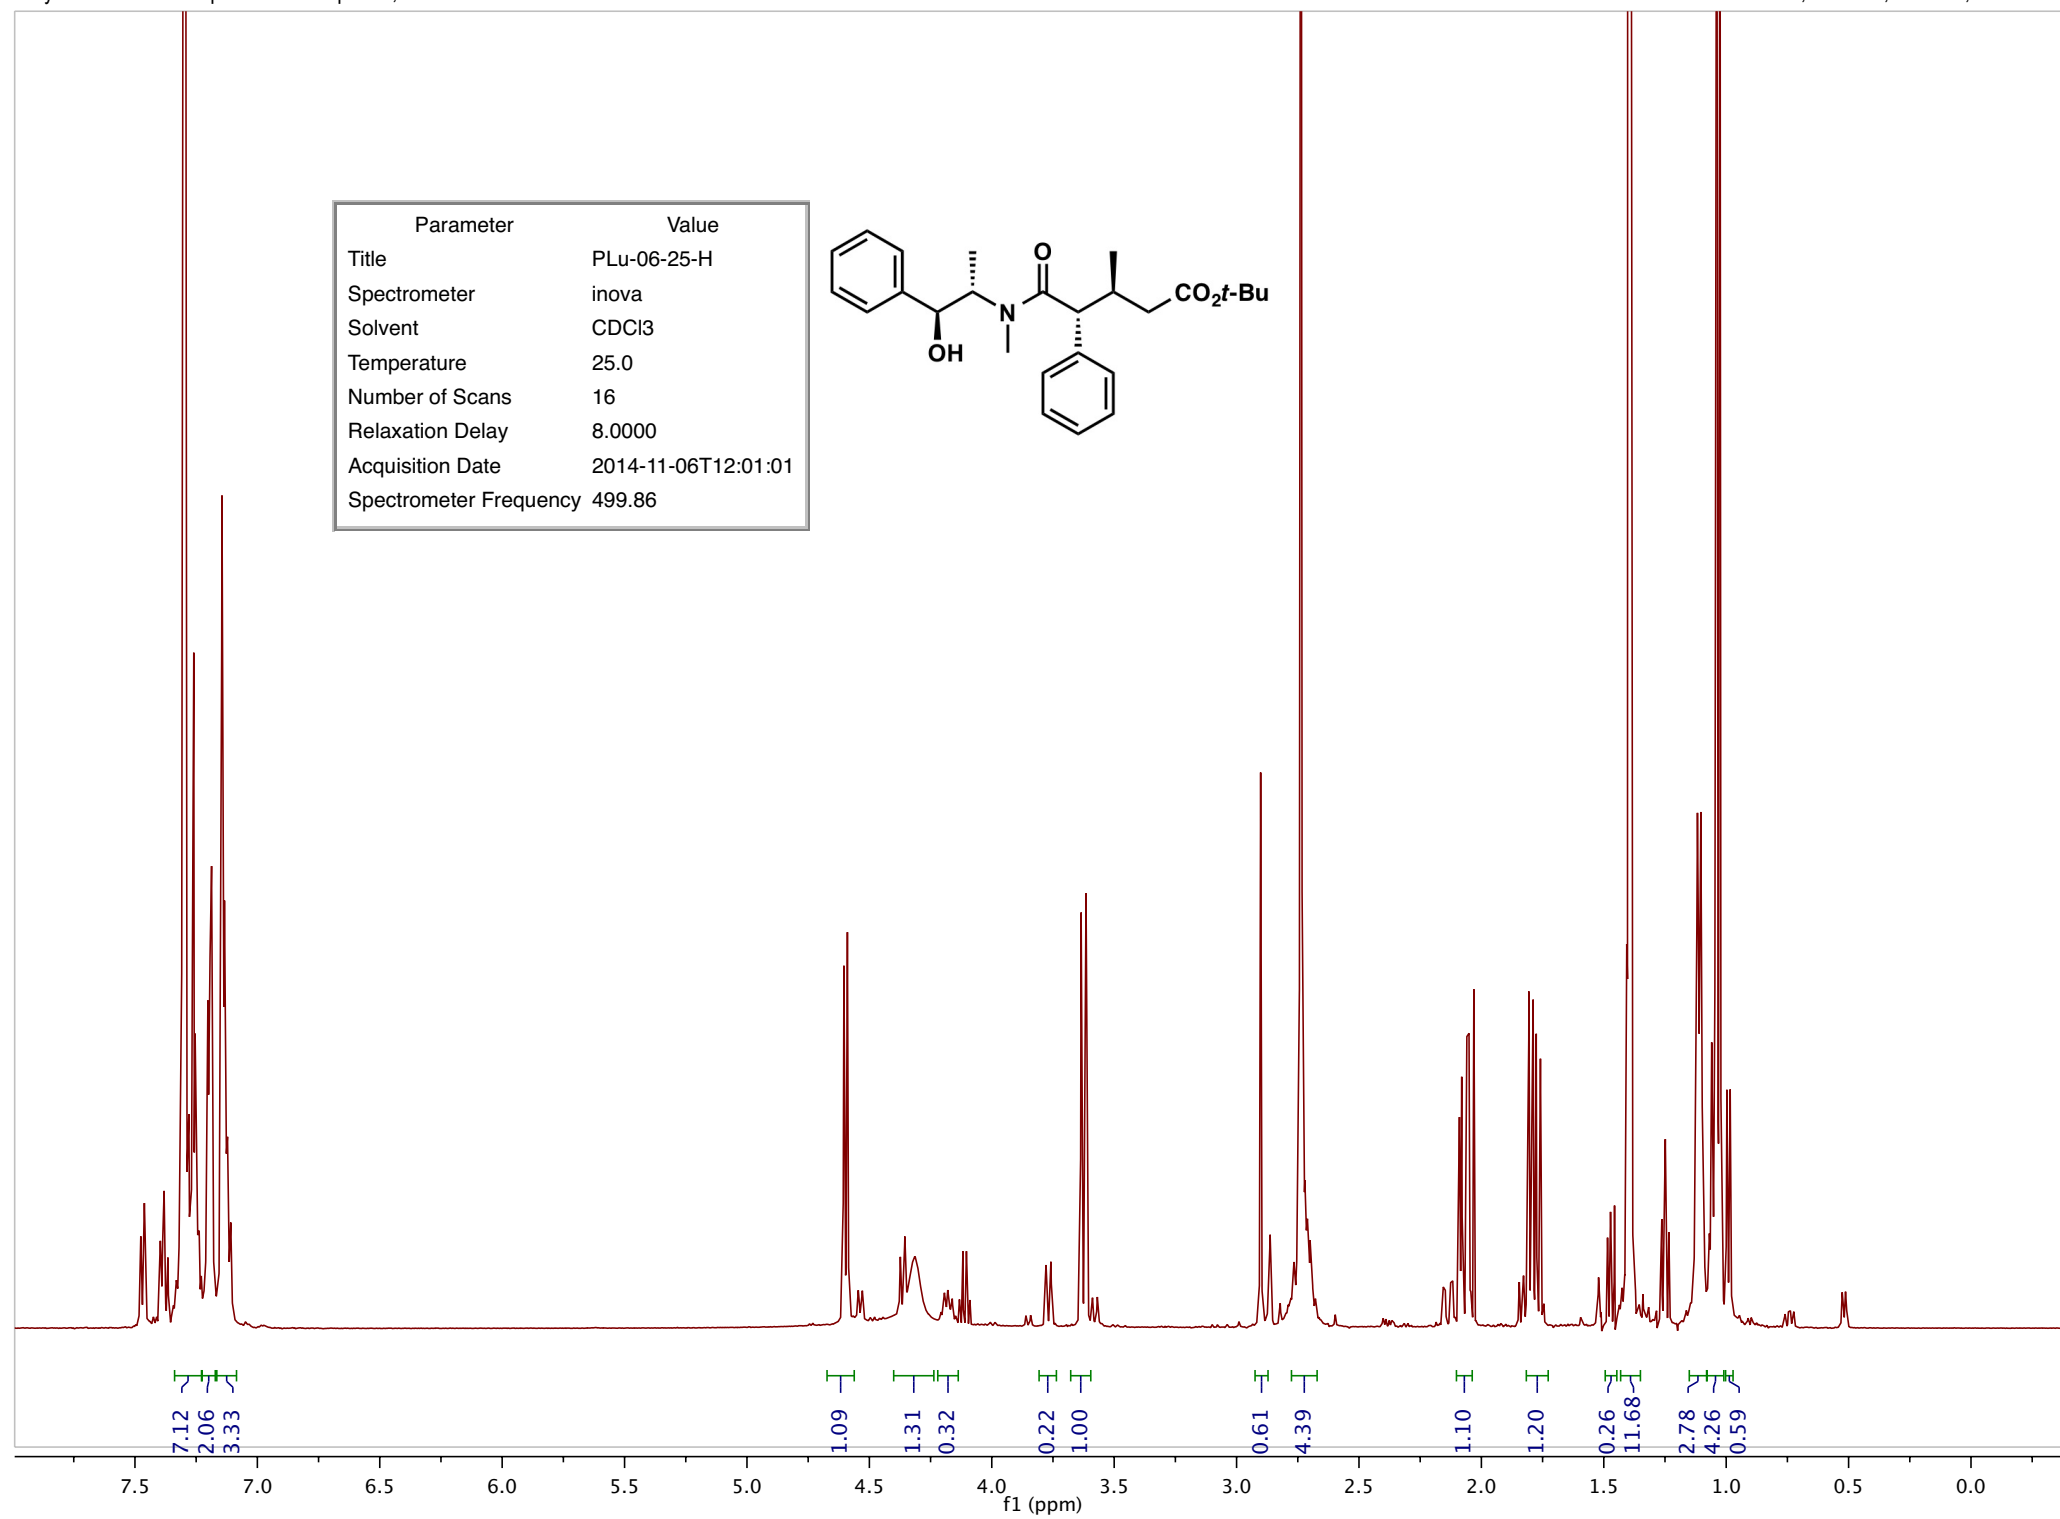



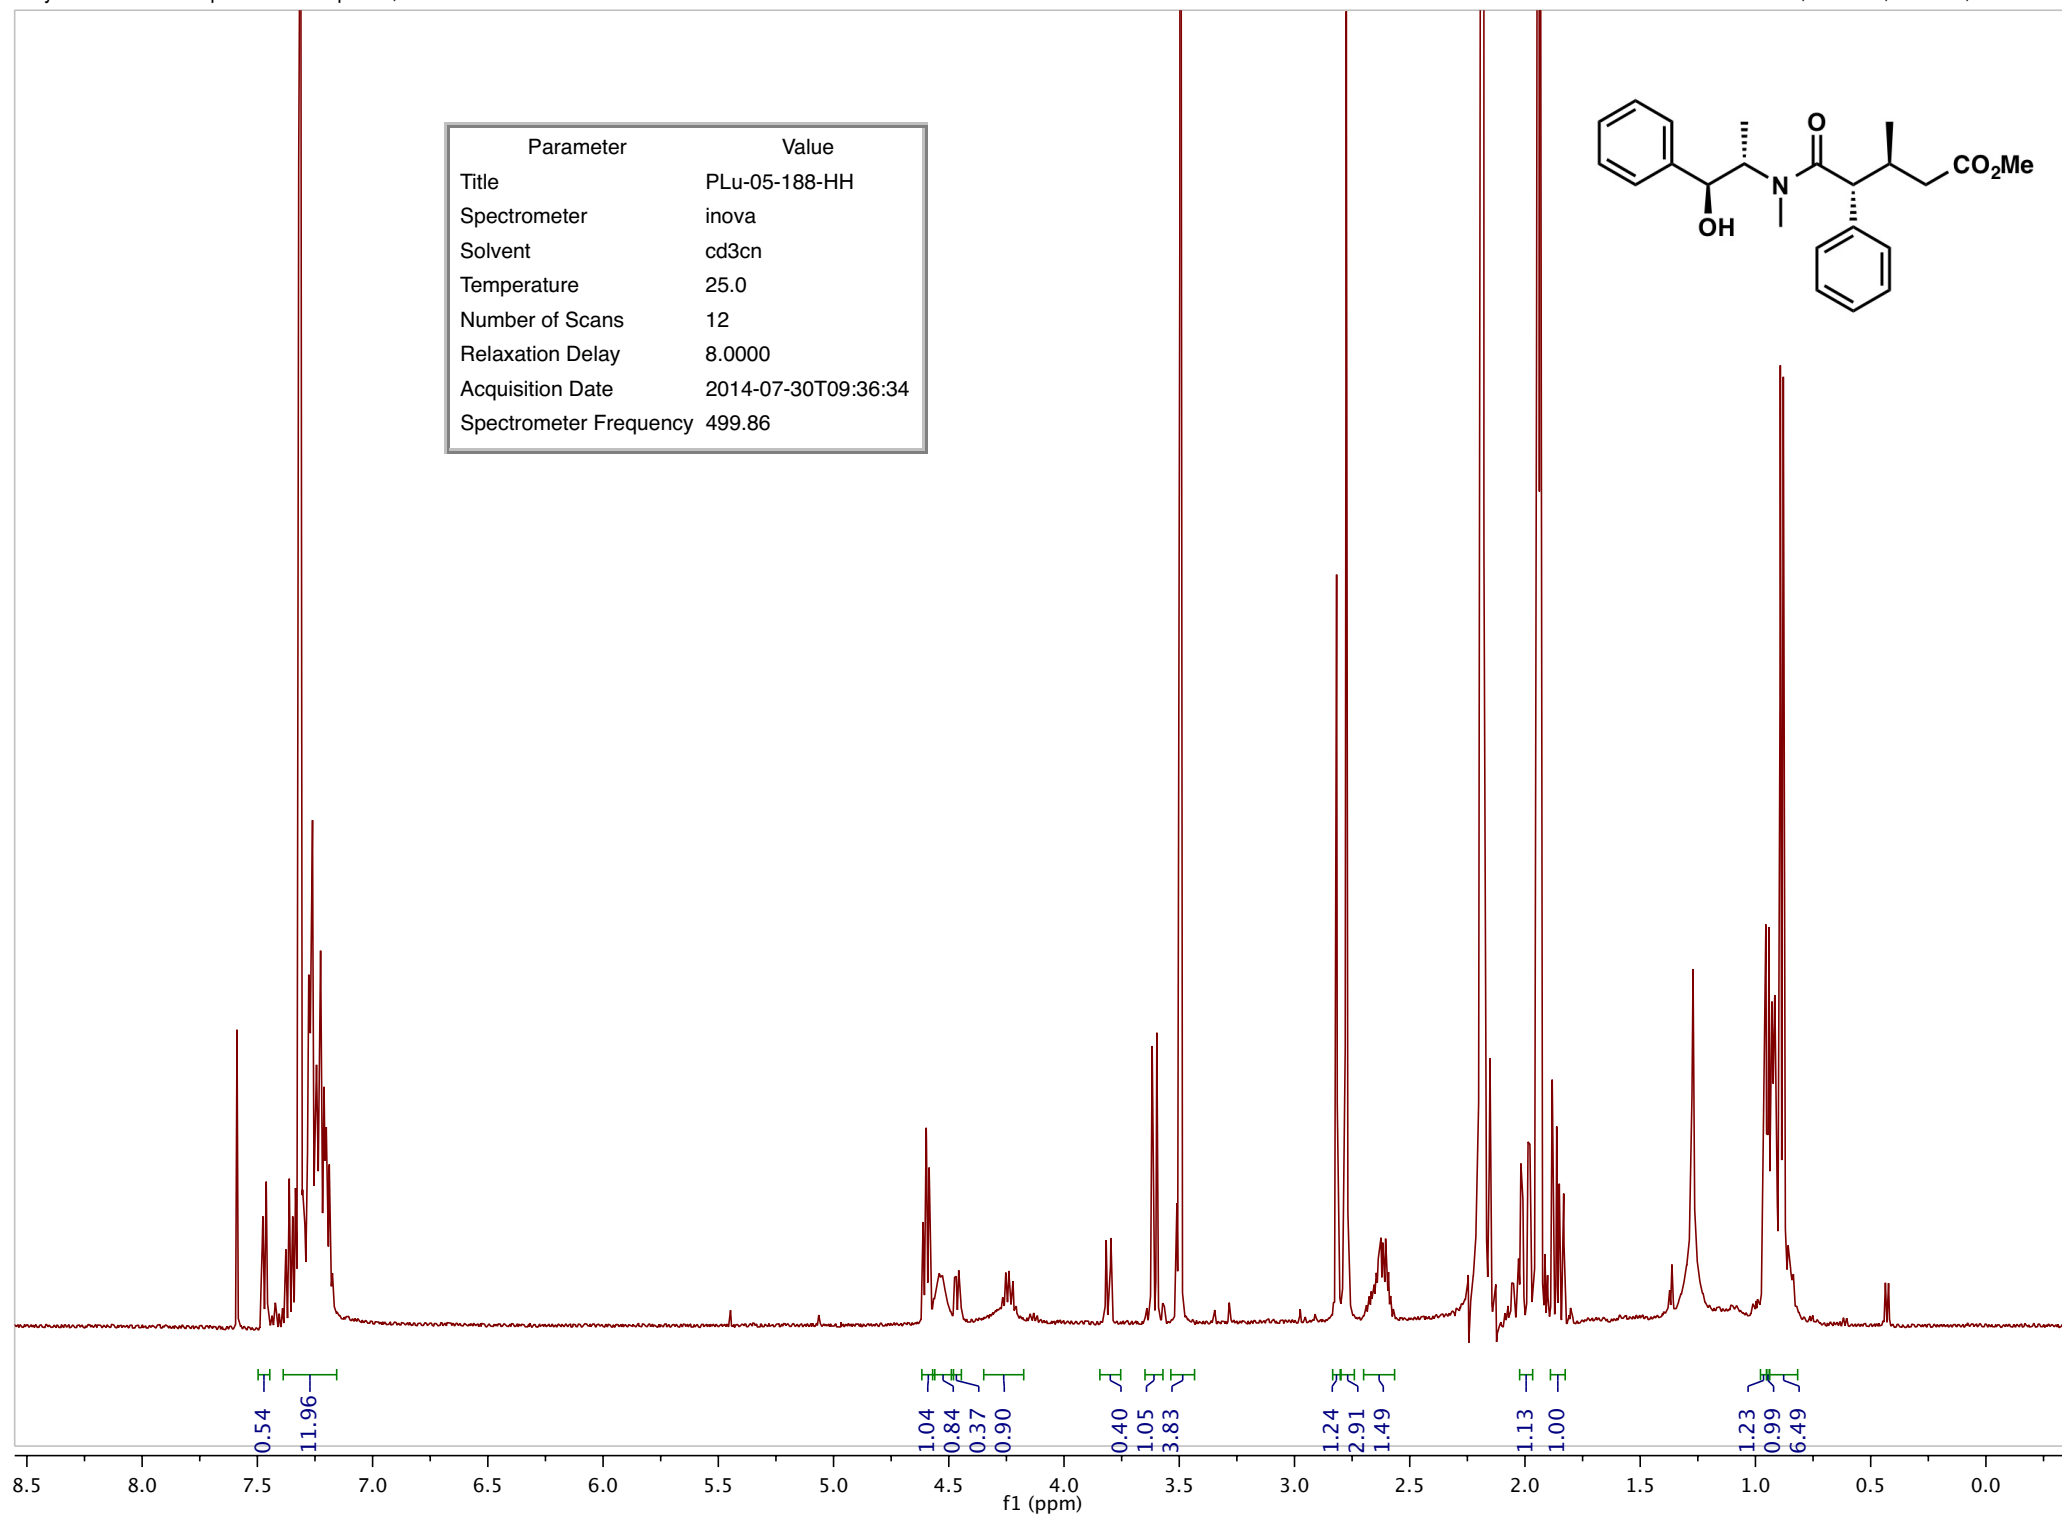

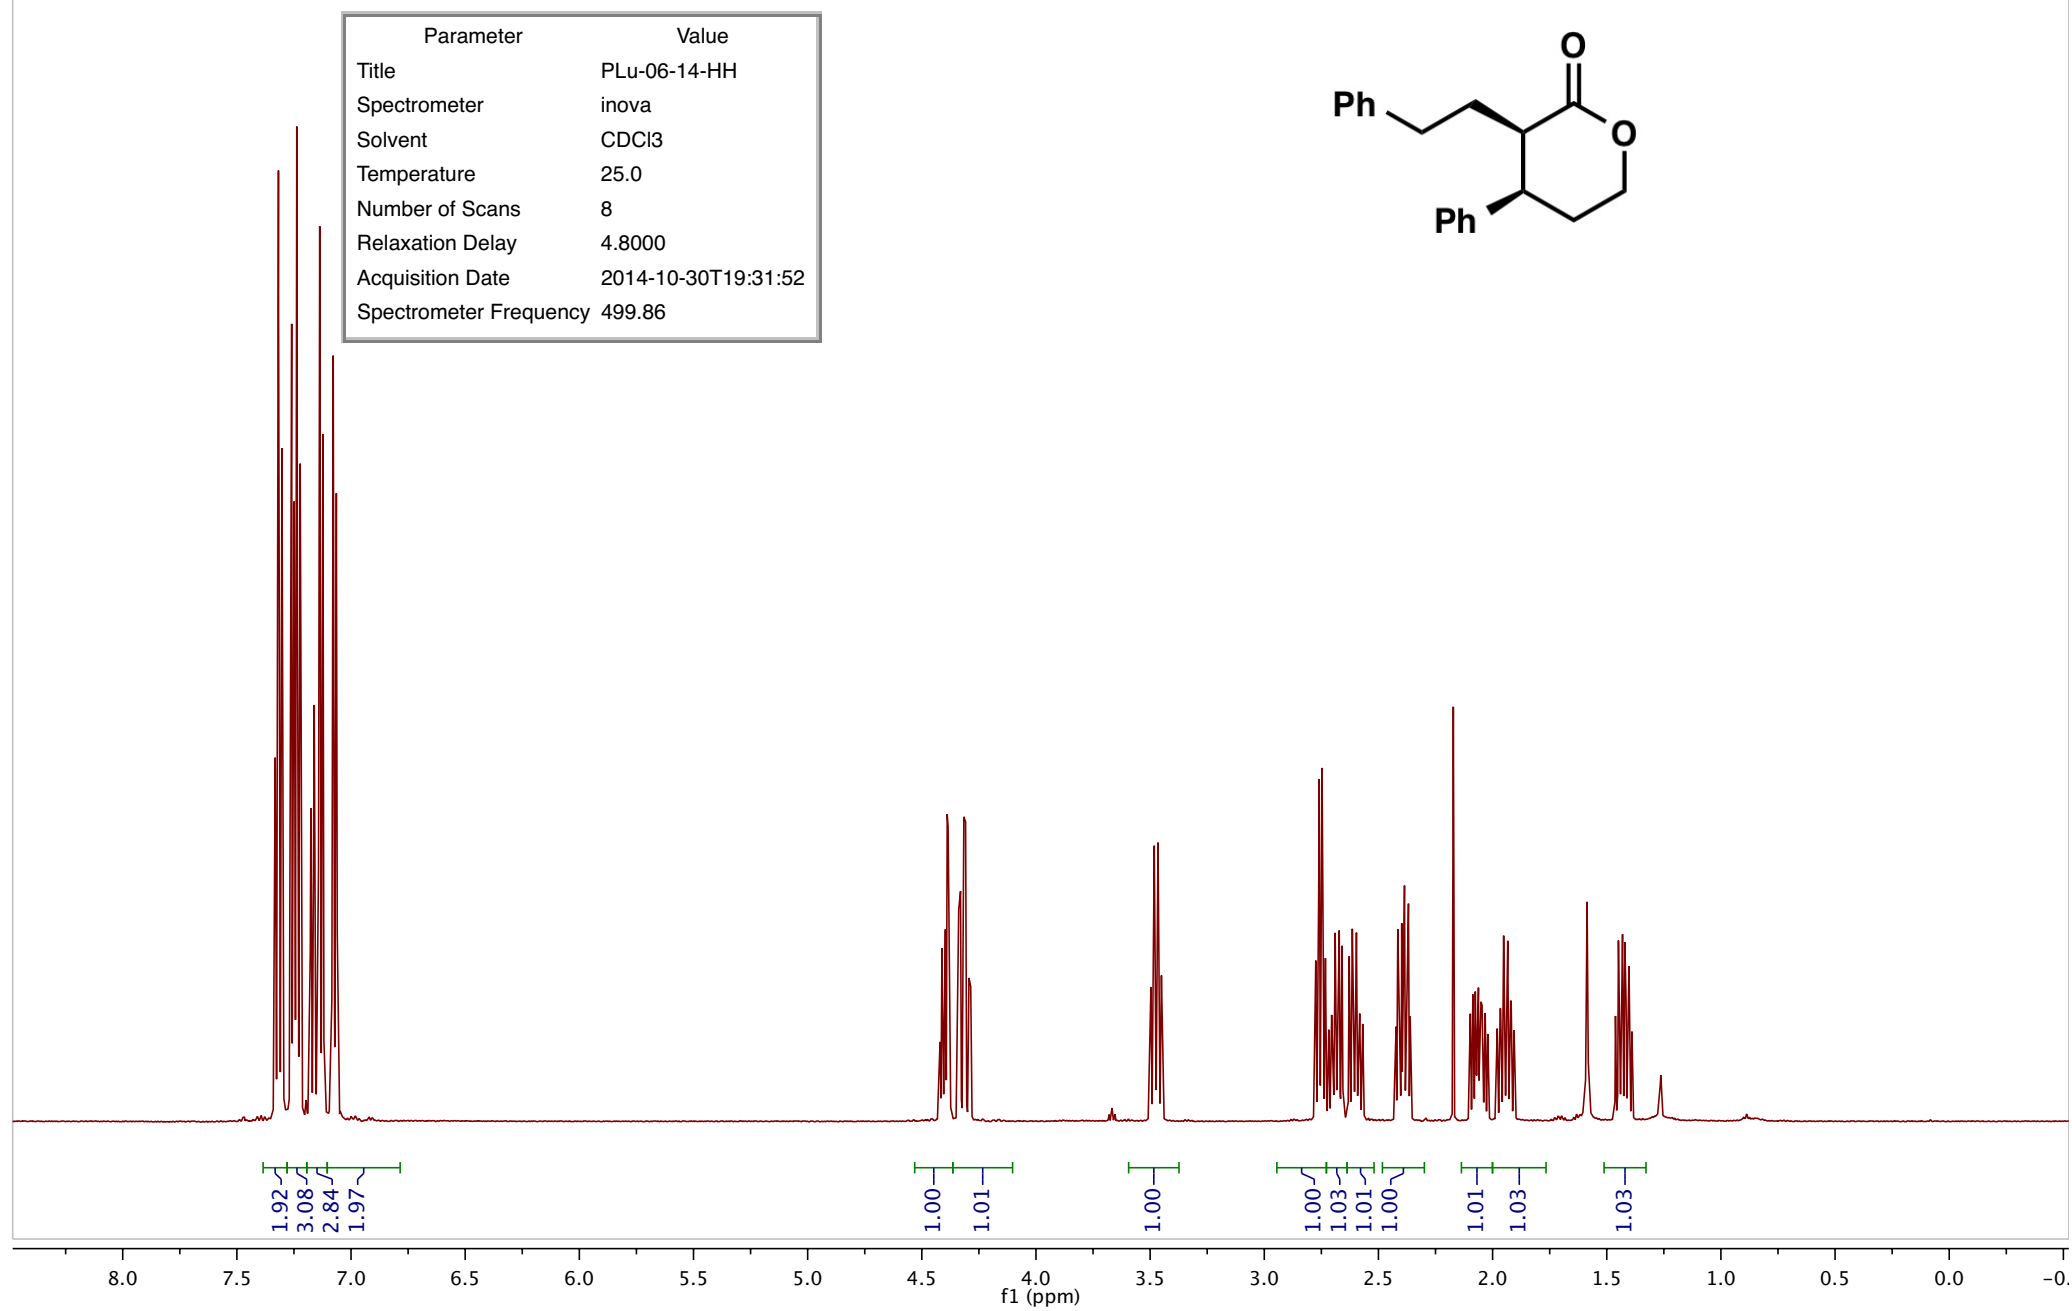

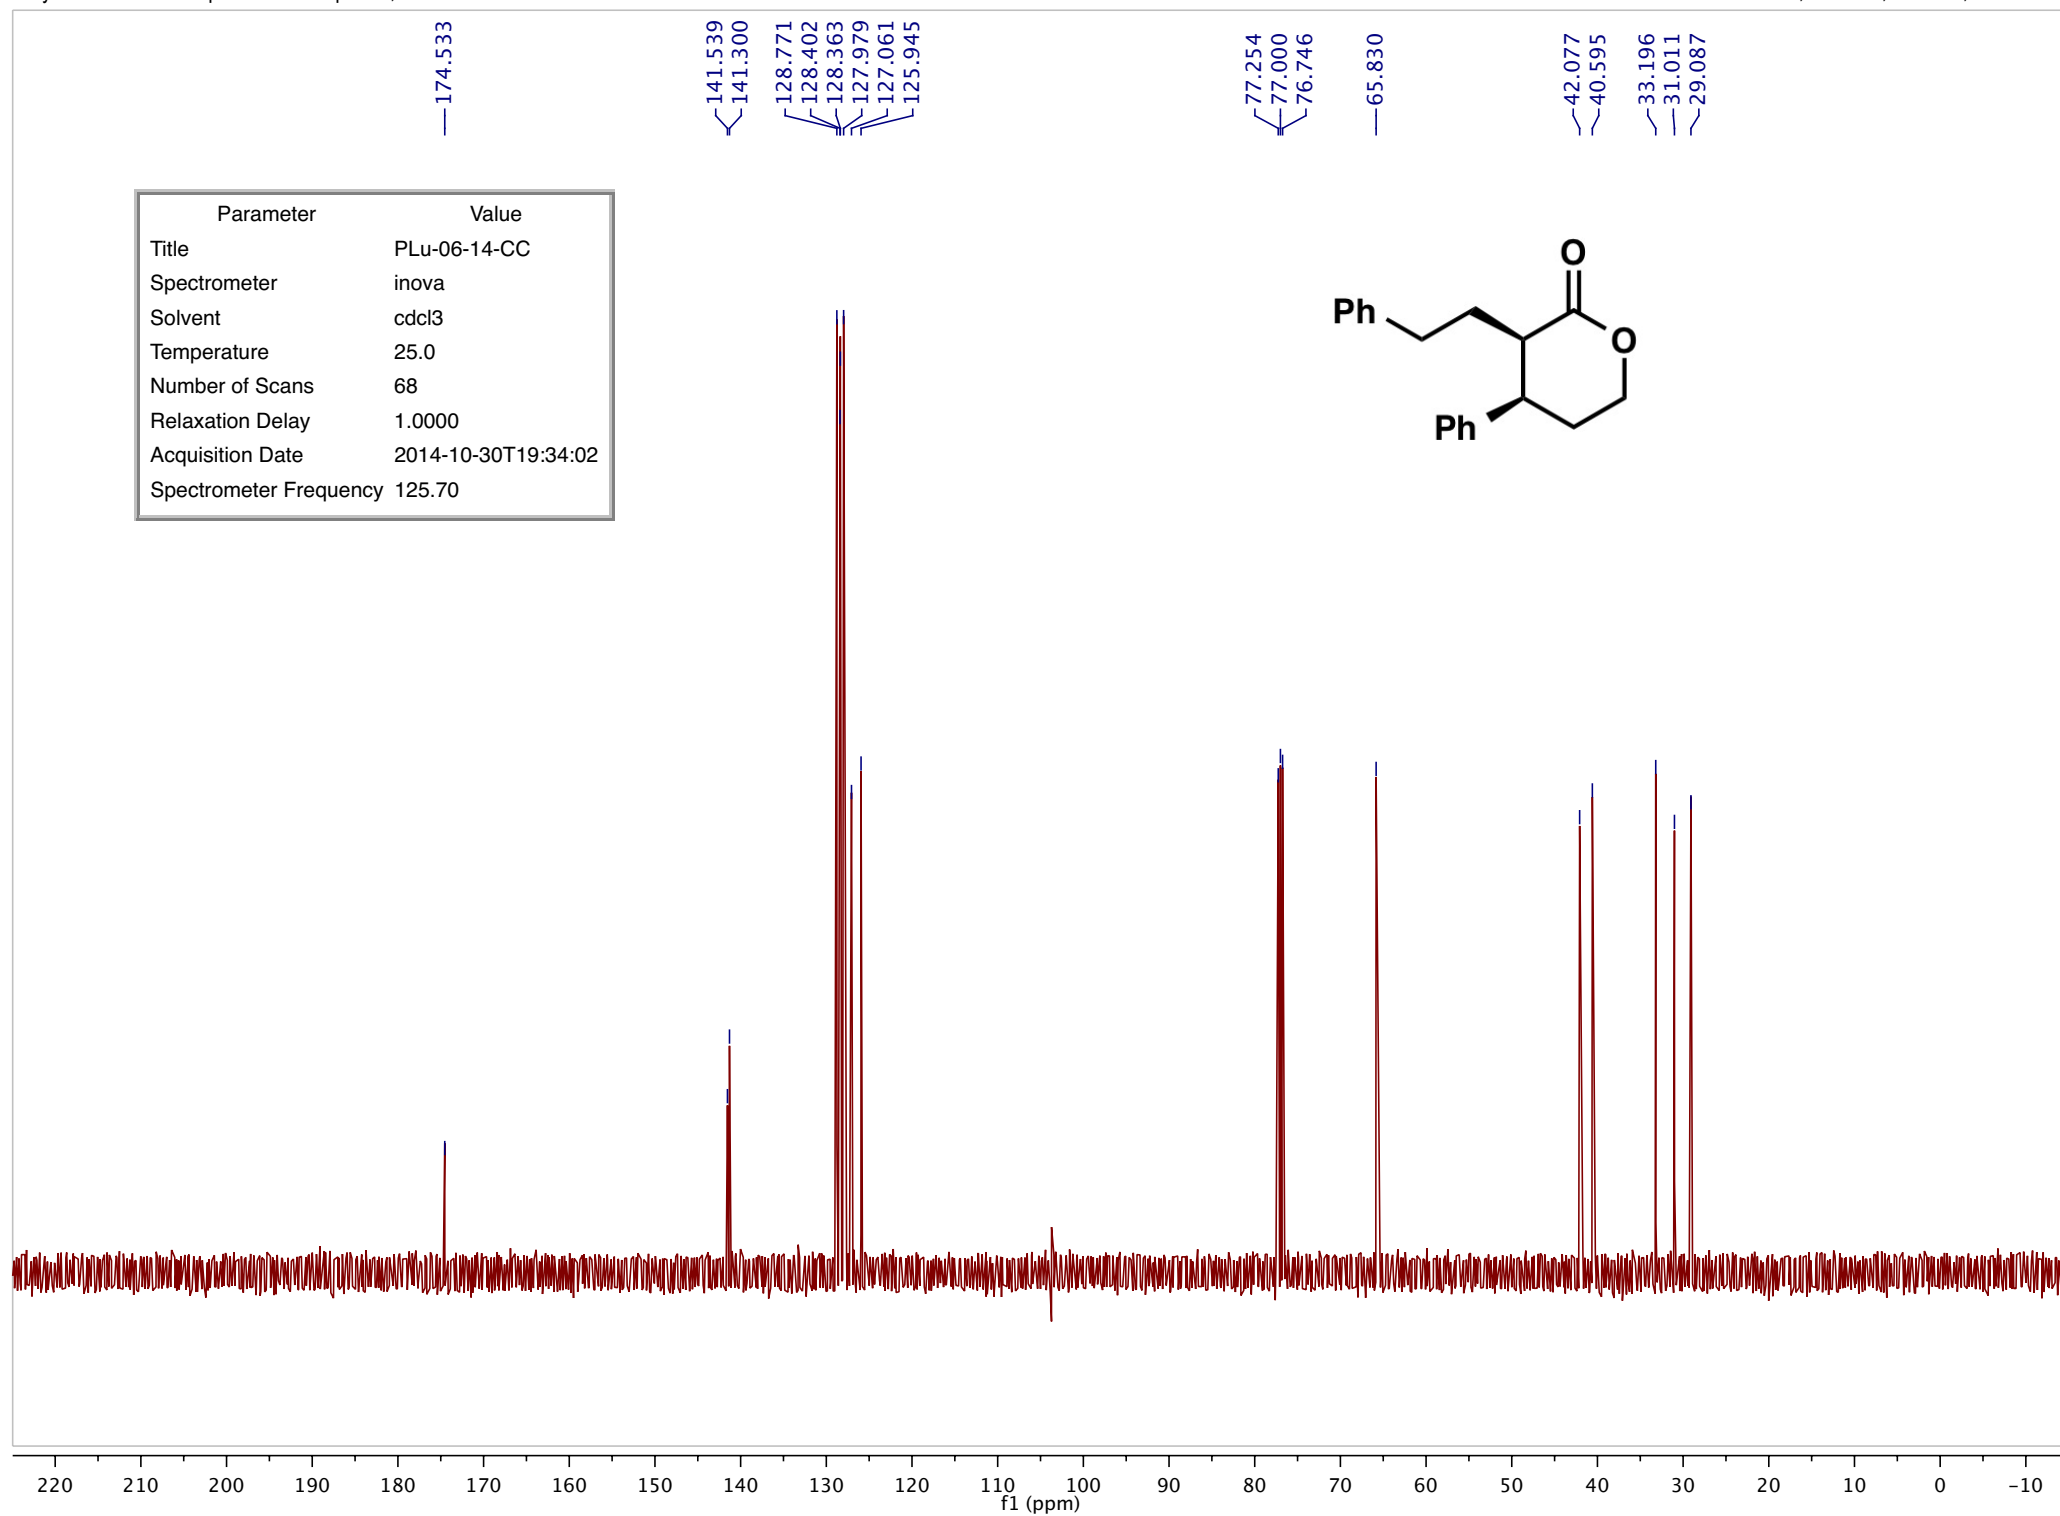

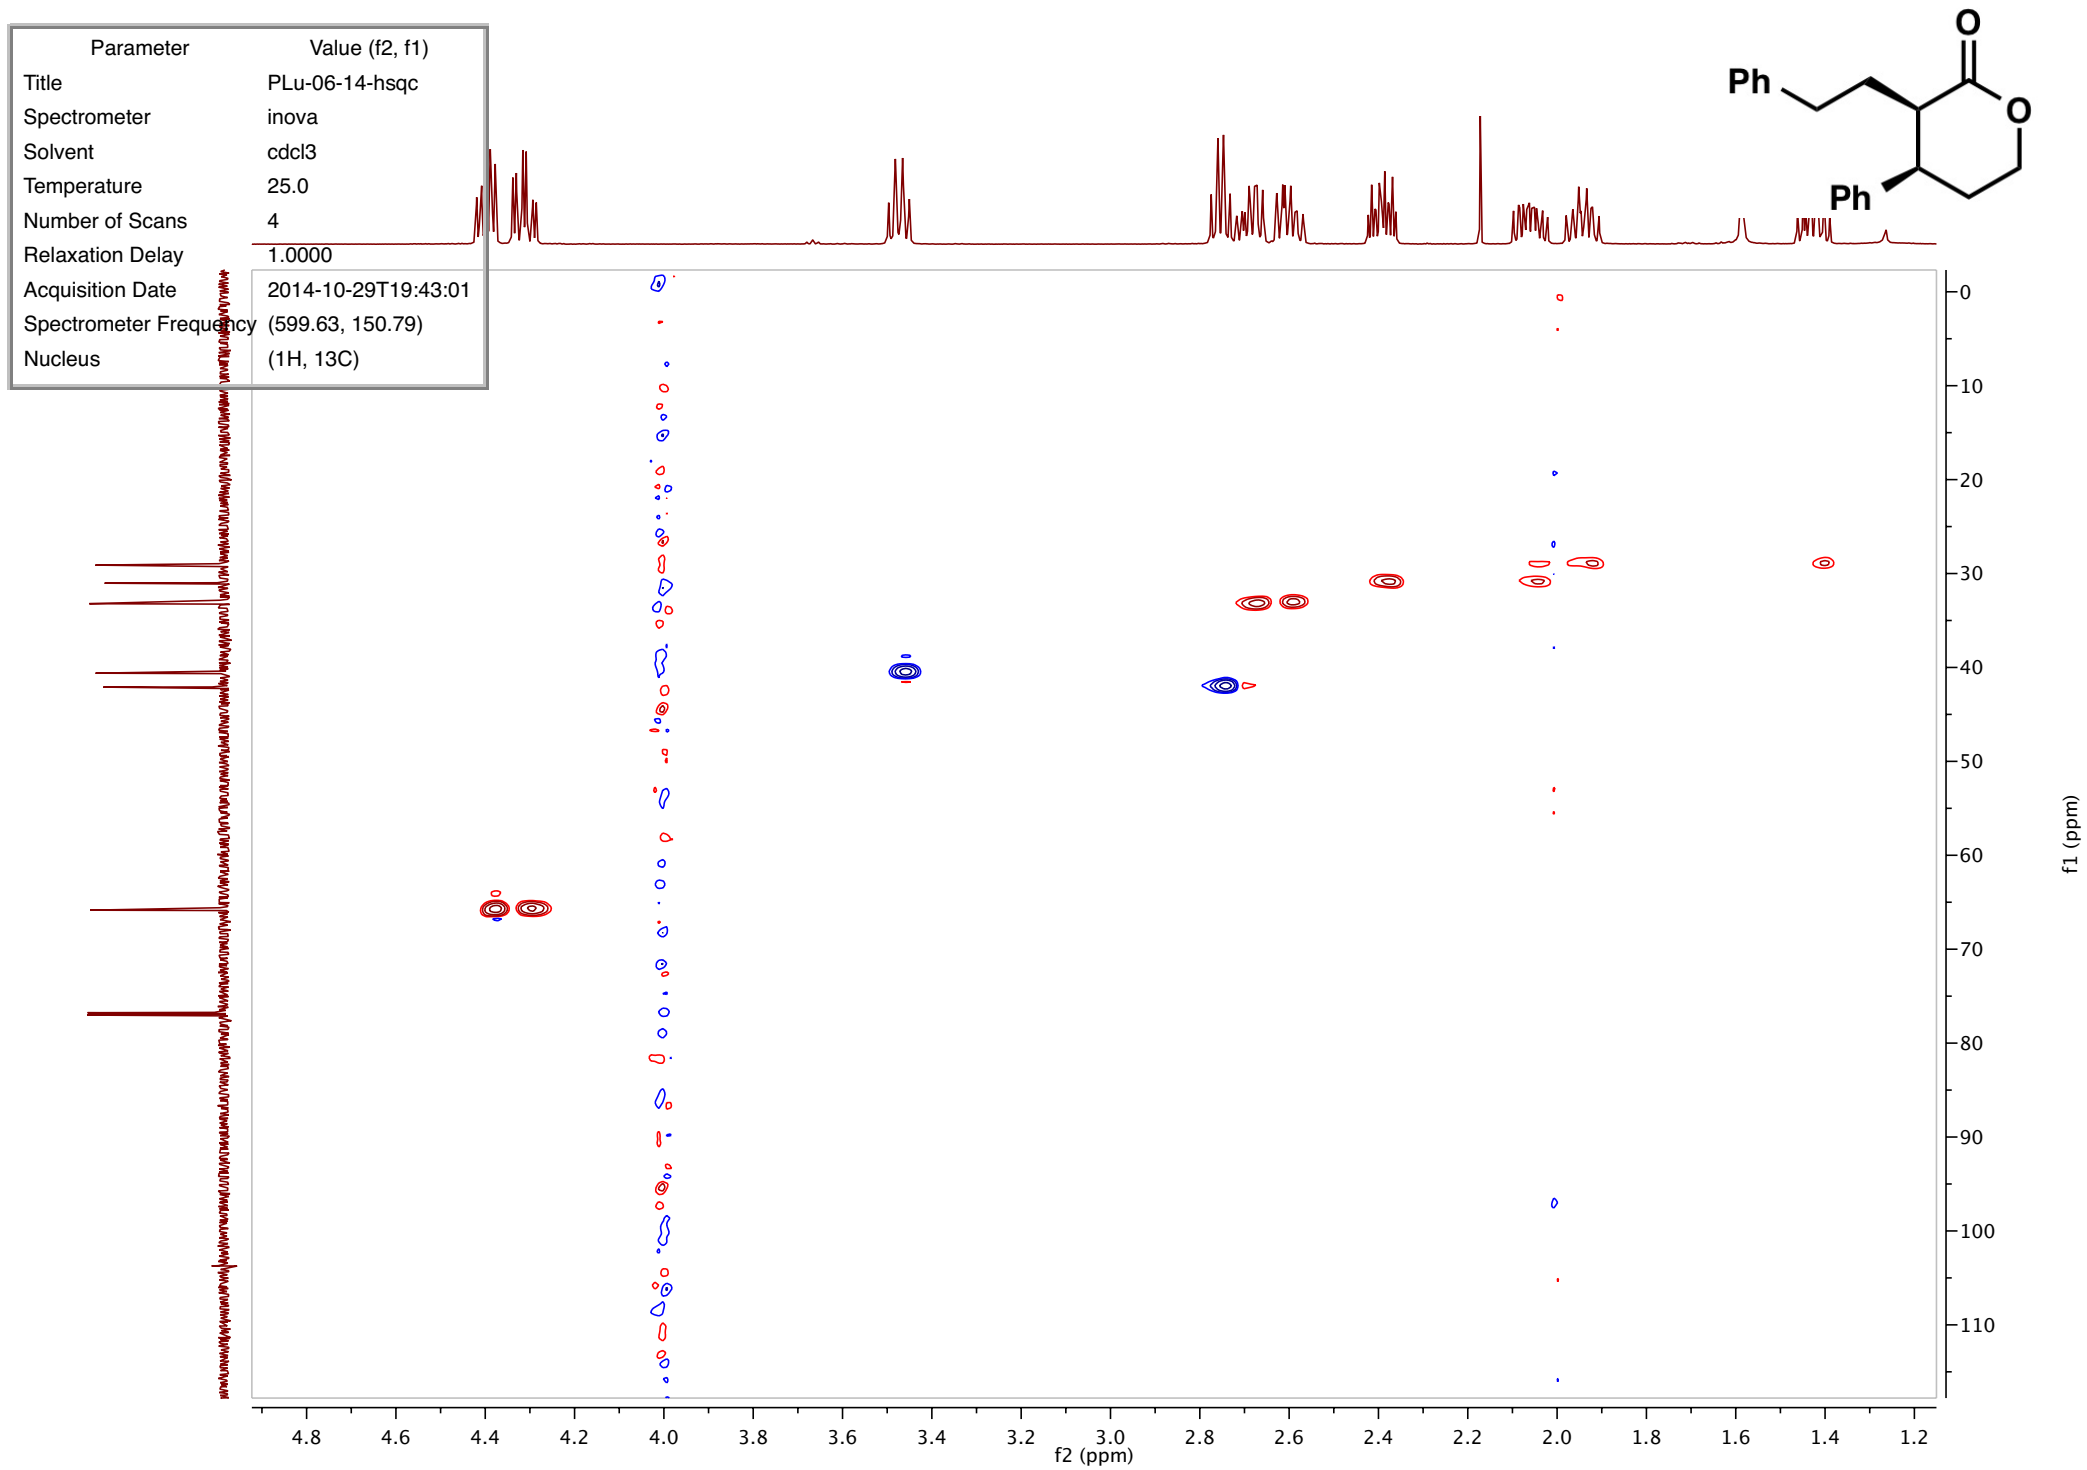

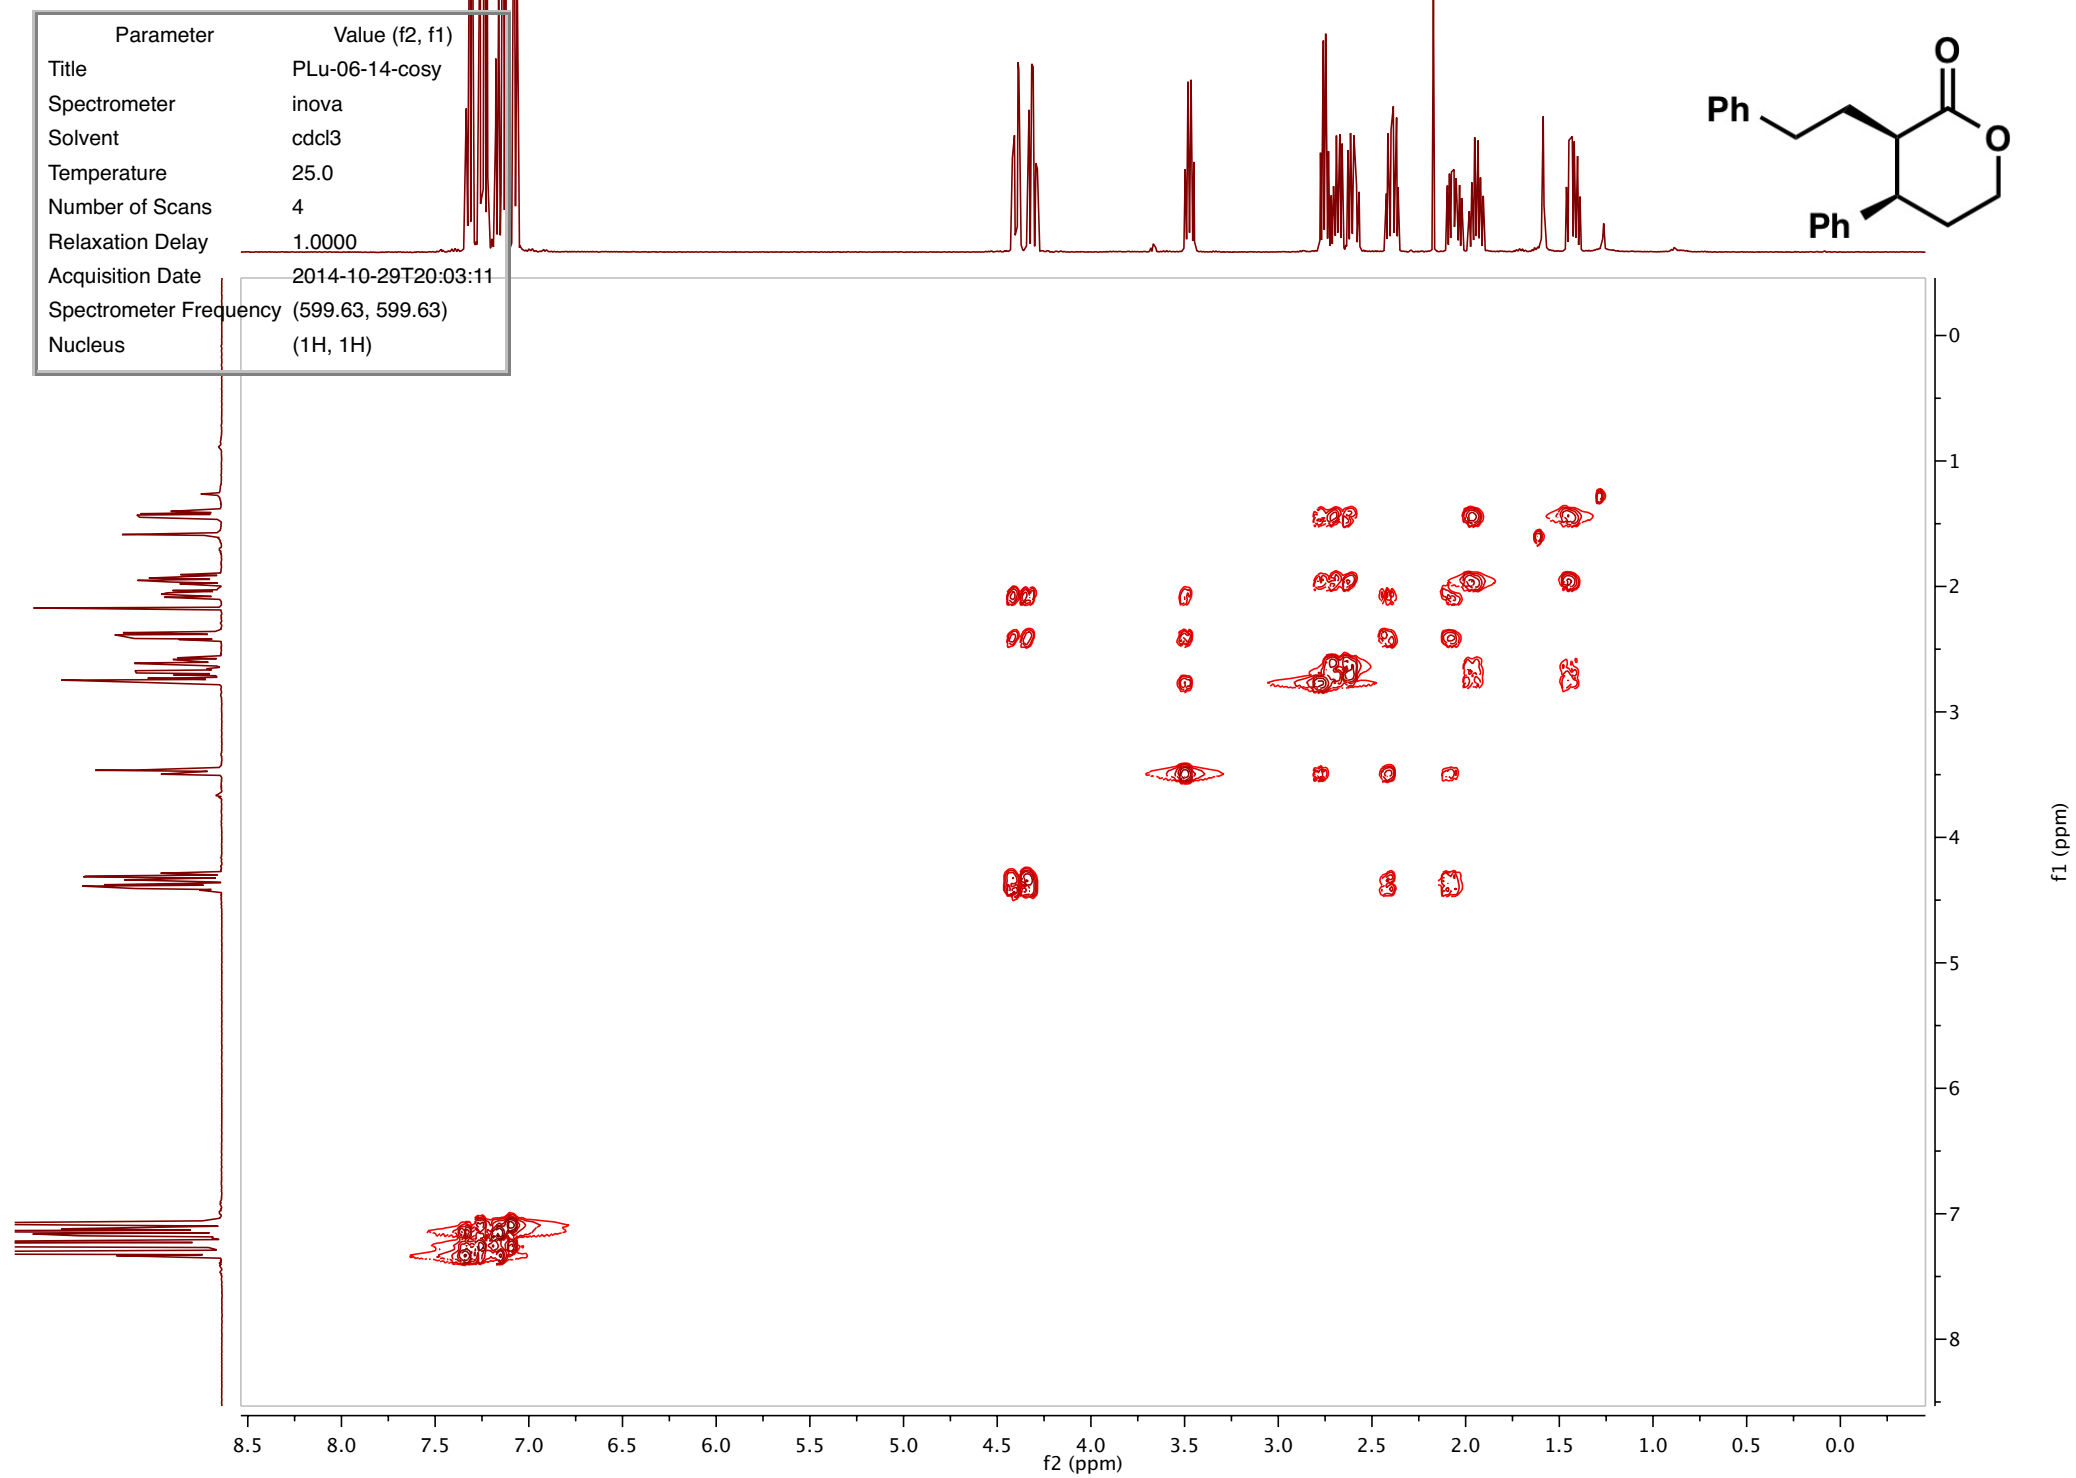

| Parameter              | Value               |
|------------------------|---------------------|
| Title                  | PLu-06-14-cnoe2     |
| Spectrometer           | inova               |
| Solvent                | CDCl <sub>3</sub>   |
| Temperature            | 25.0                |
| Number of Scans        | 64                  |
| Relaxation Delay       | 2.0000              |
| Acquisition Date       | 2014-11-01T10:32:06 |
| Spectrometer Frequency | 499.86              |

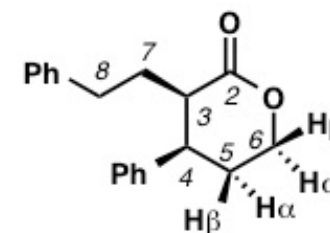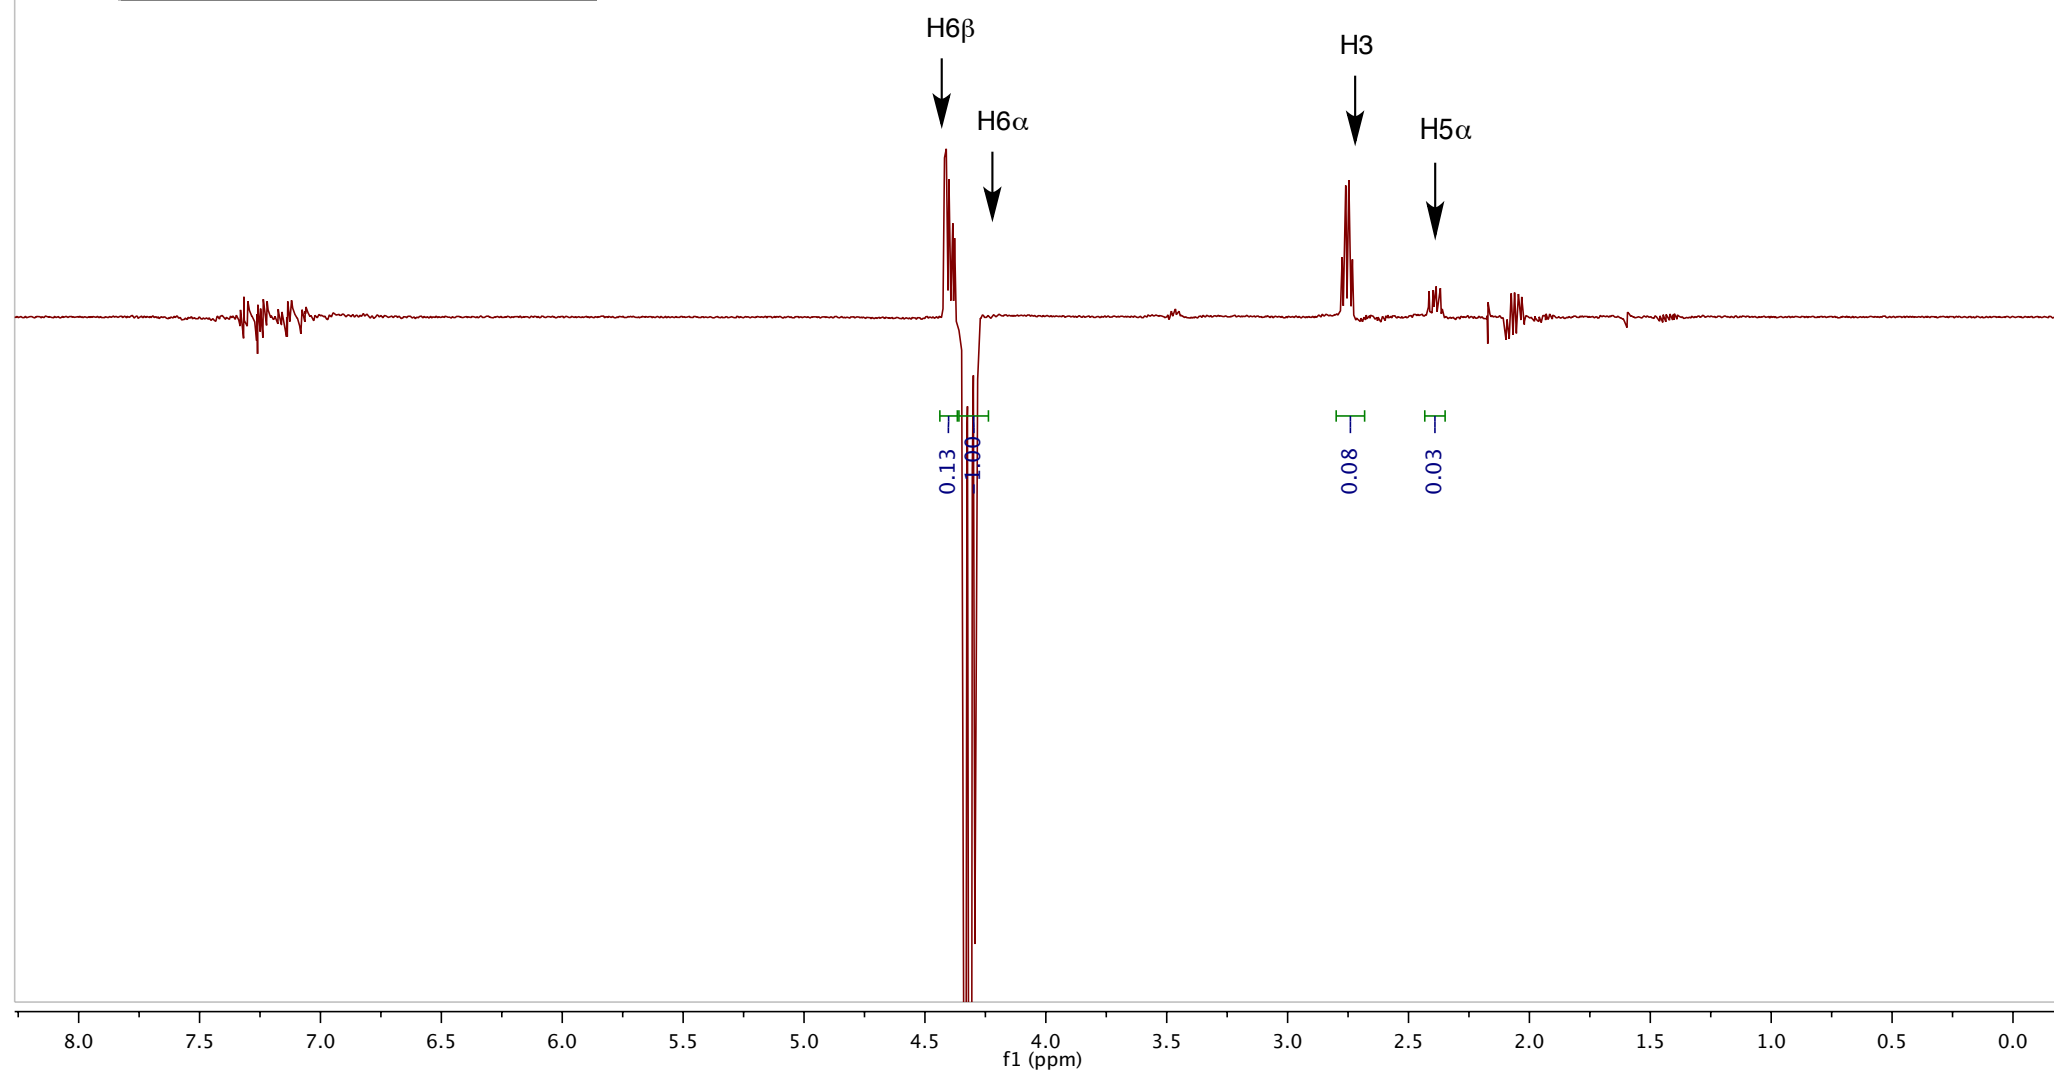

| Parameter              | Value               |
|------------------------|---------------------|
| Title                  | PLu-06-14-cnoe-3    |
| Spectrometer           | inova               |
| Solvent                | CDCl <sub>3</sub>   |
| Temperature            | 25.0                |
| Number of Scans        | 64                  |
| Relaxation Delay       | 2.0000              |
| Acquisition Date       | 2014-11-01T10:45:53 |
| Spectrometer Frequency | 499.86              |

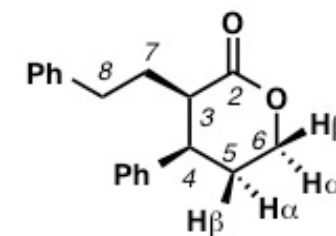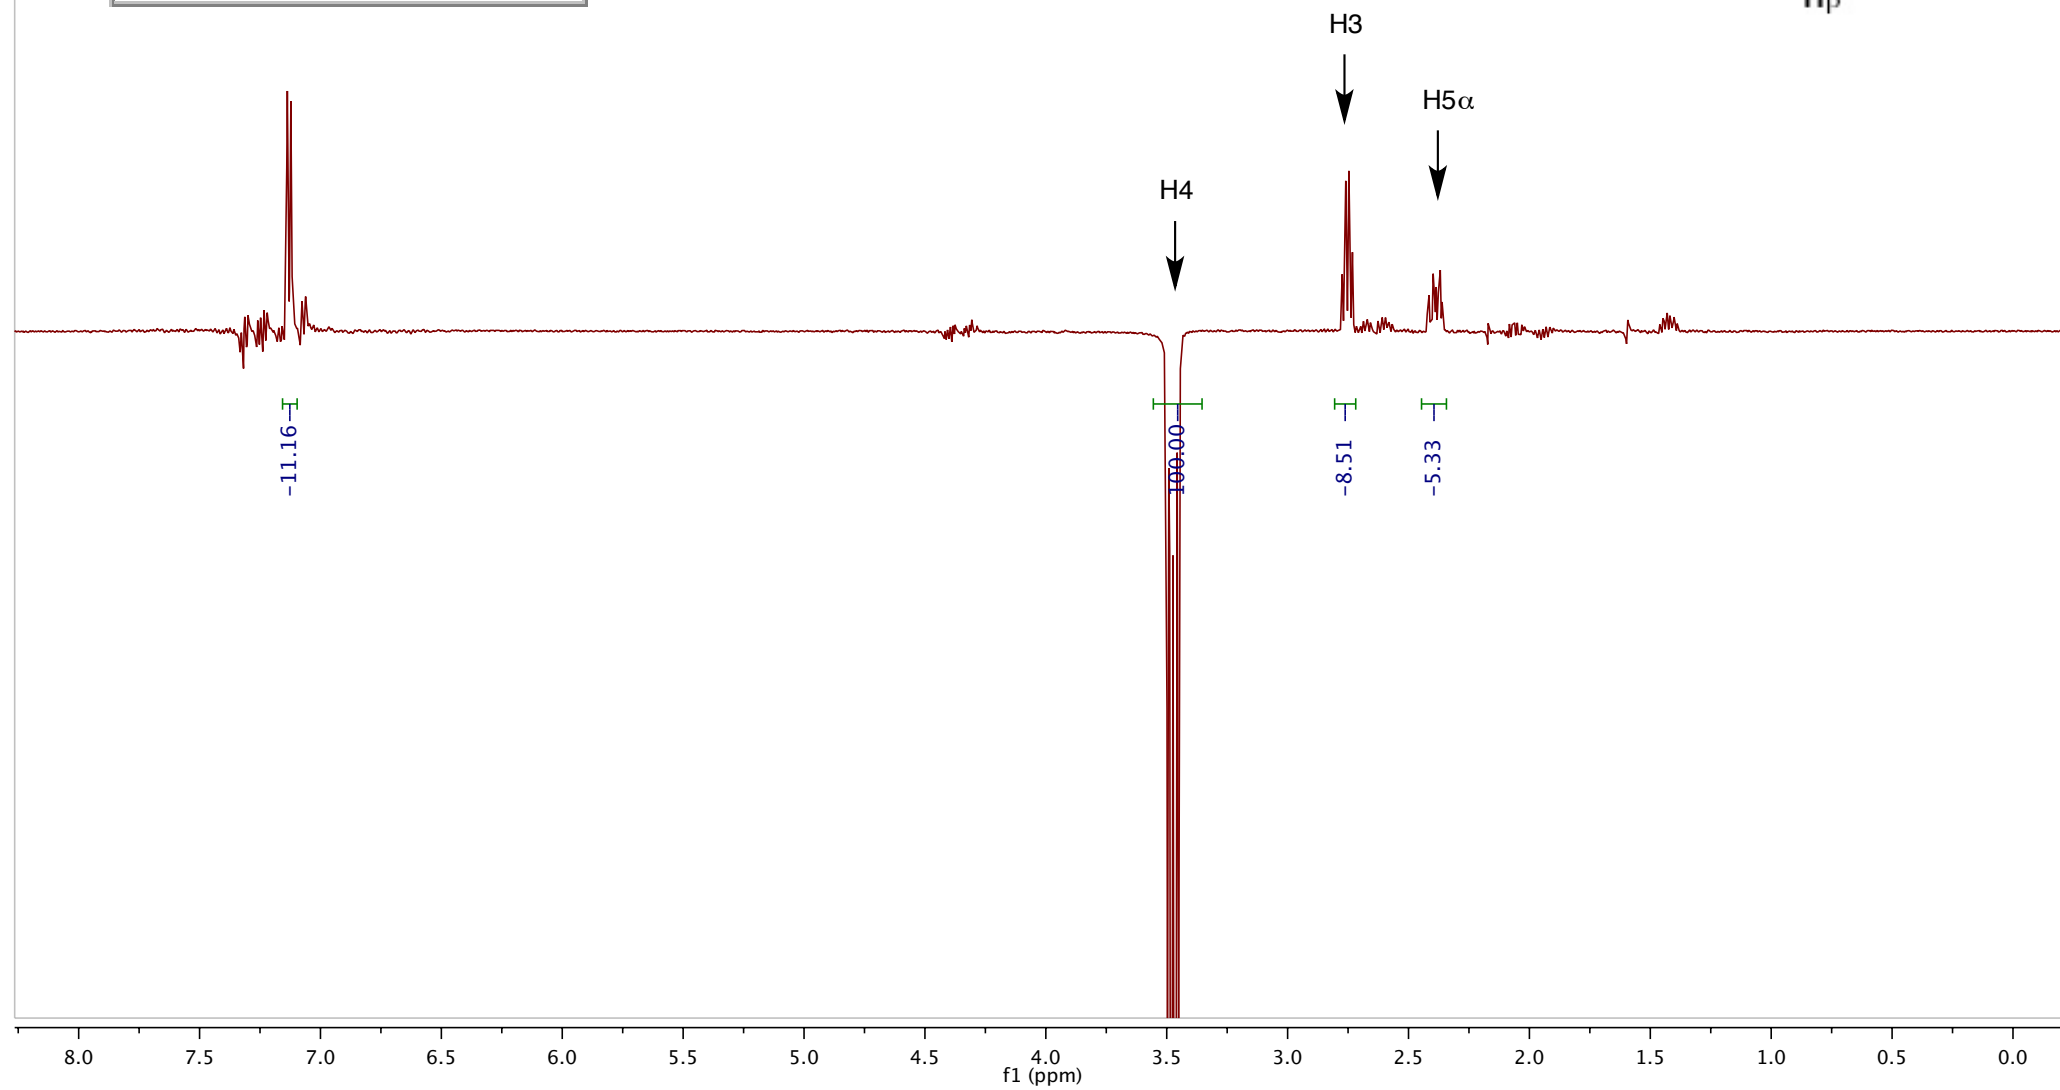

| Parameter              | Value               |
|------------------------|---------------------|
| Title                  | PLu-06-14-cnoe-7    |
| Spectrometer           | inova               |
| Solvent                | CDCl <sub>3</sub>   |
| Temperature            | 25.0                |
| Number of Scans        | 32                  |
| Relaxation Delay       | 2.0000              |
| Acquisition Date       | 2014-11-01T11:21:11 |
| Spectrometer Frequency | 499.86              |

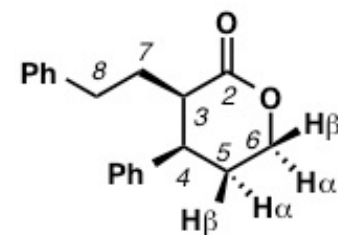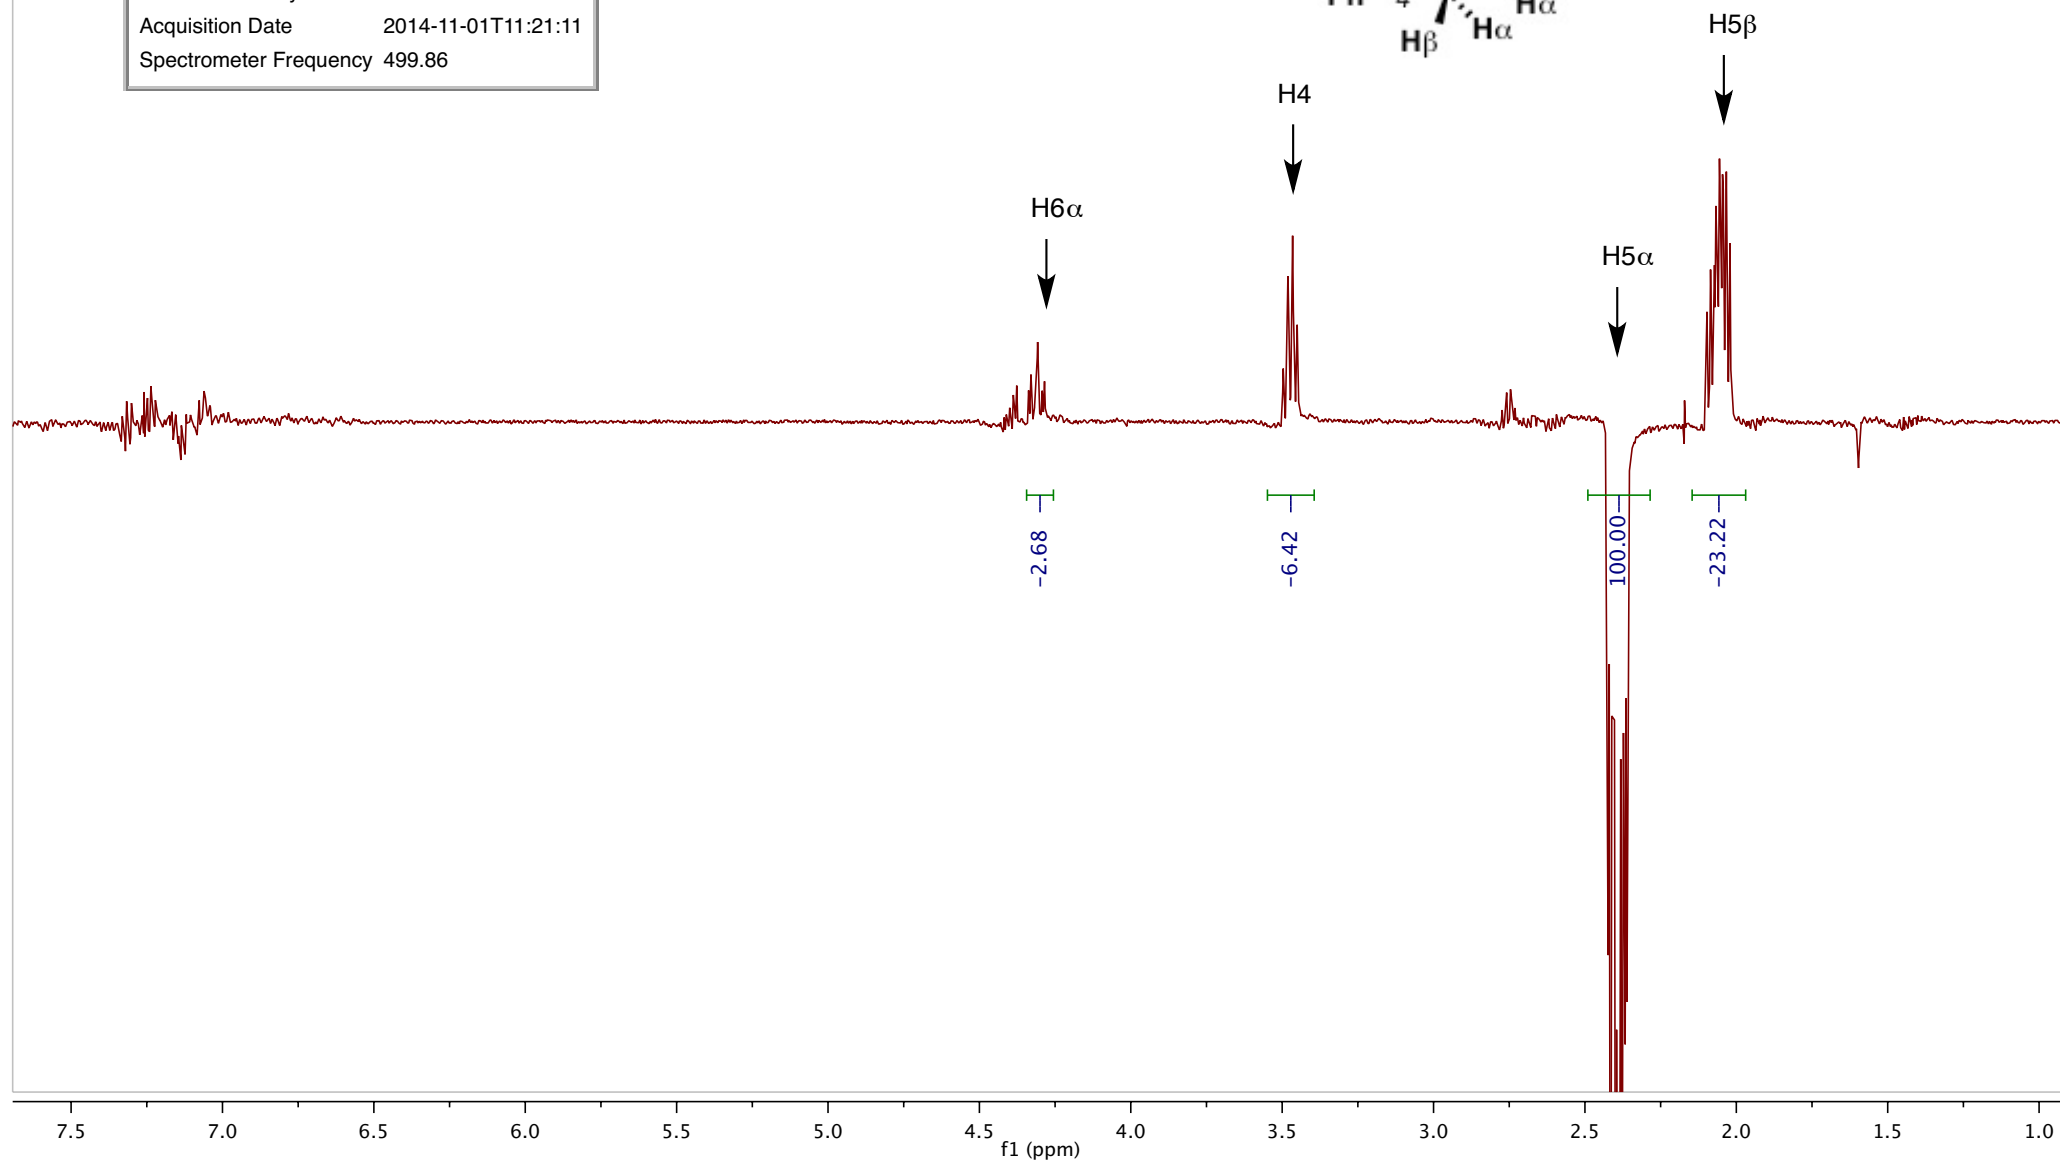



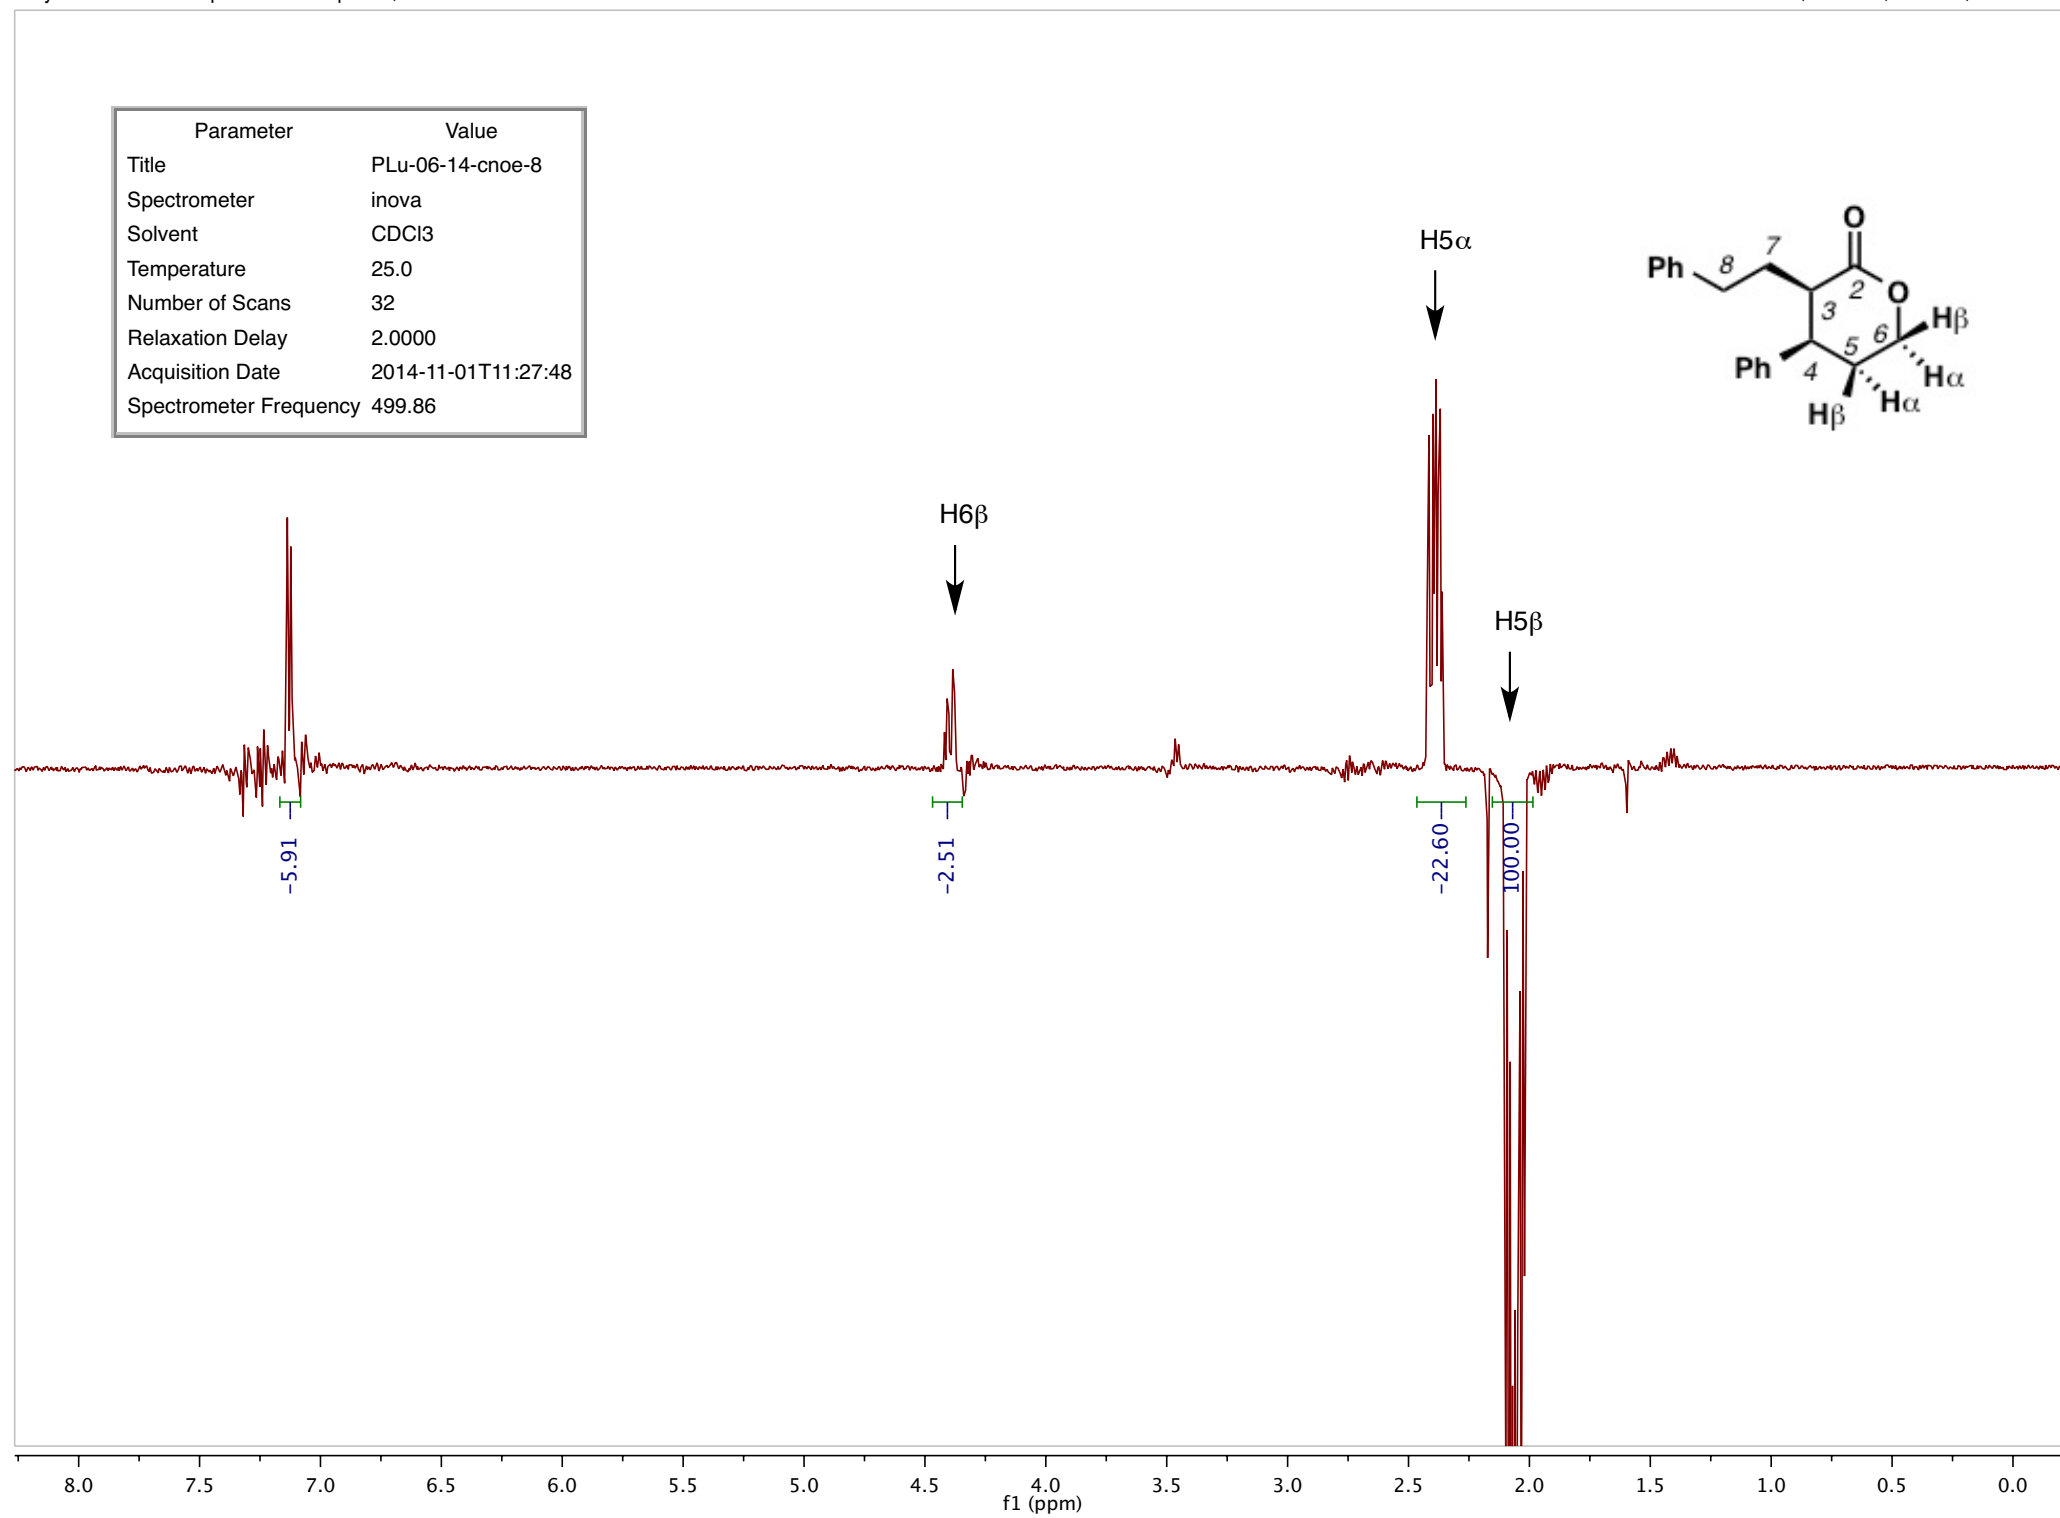

| Parameter              | Value               |
|------------------------|---------------------|
| Title                  | PLu-06-14-cnoe-9    |
| Spectrometer           | inova               |
| Solvent                | CDCl <sub>3</sub>   |
| Temperature            | 25.0                |
| Number of Scans        | 32                  |
| Relaxation Delay       | 2.0000              |
| Acquisition Date       | 2014-11-01T11:34:47 |
| Spectrometer Frequency | 499.86              |

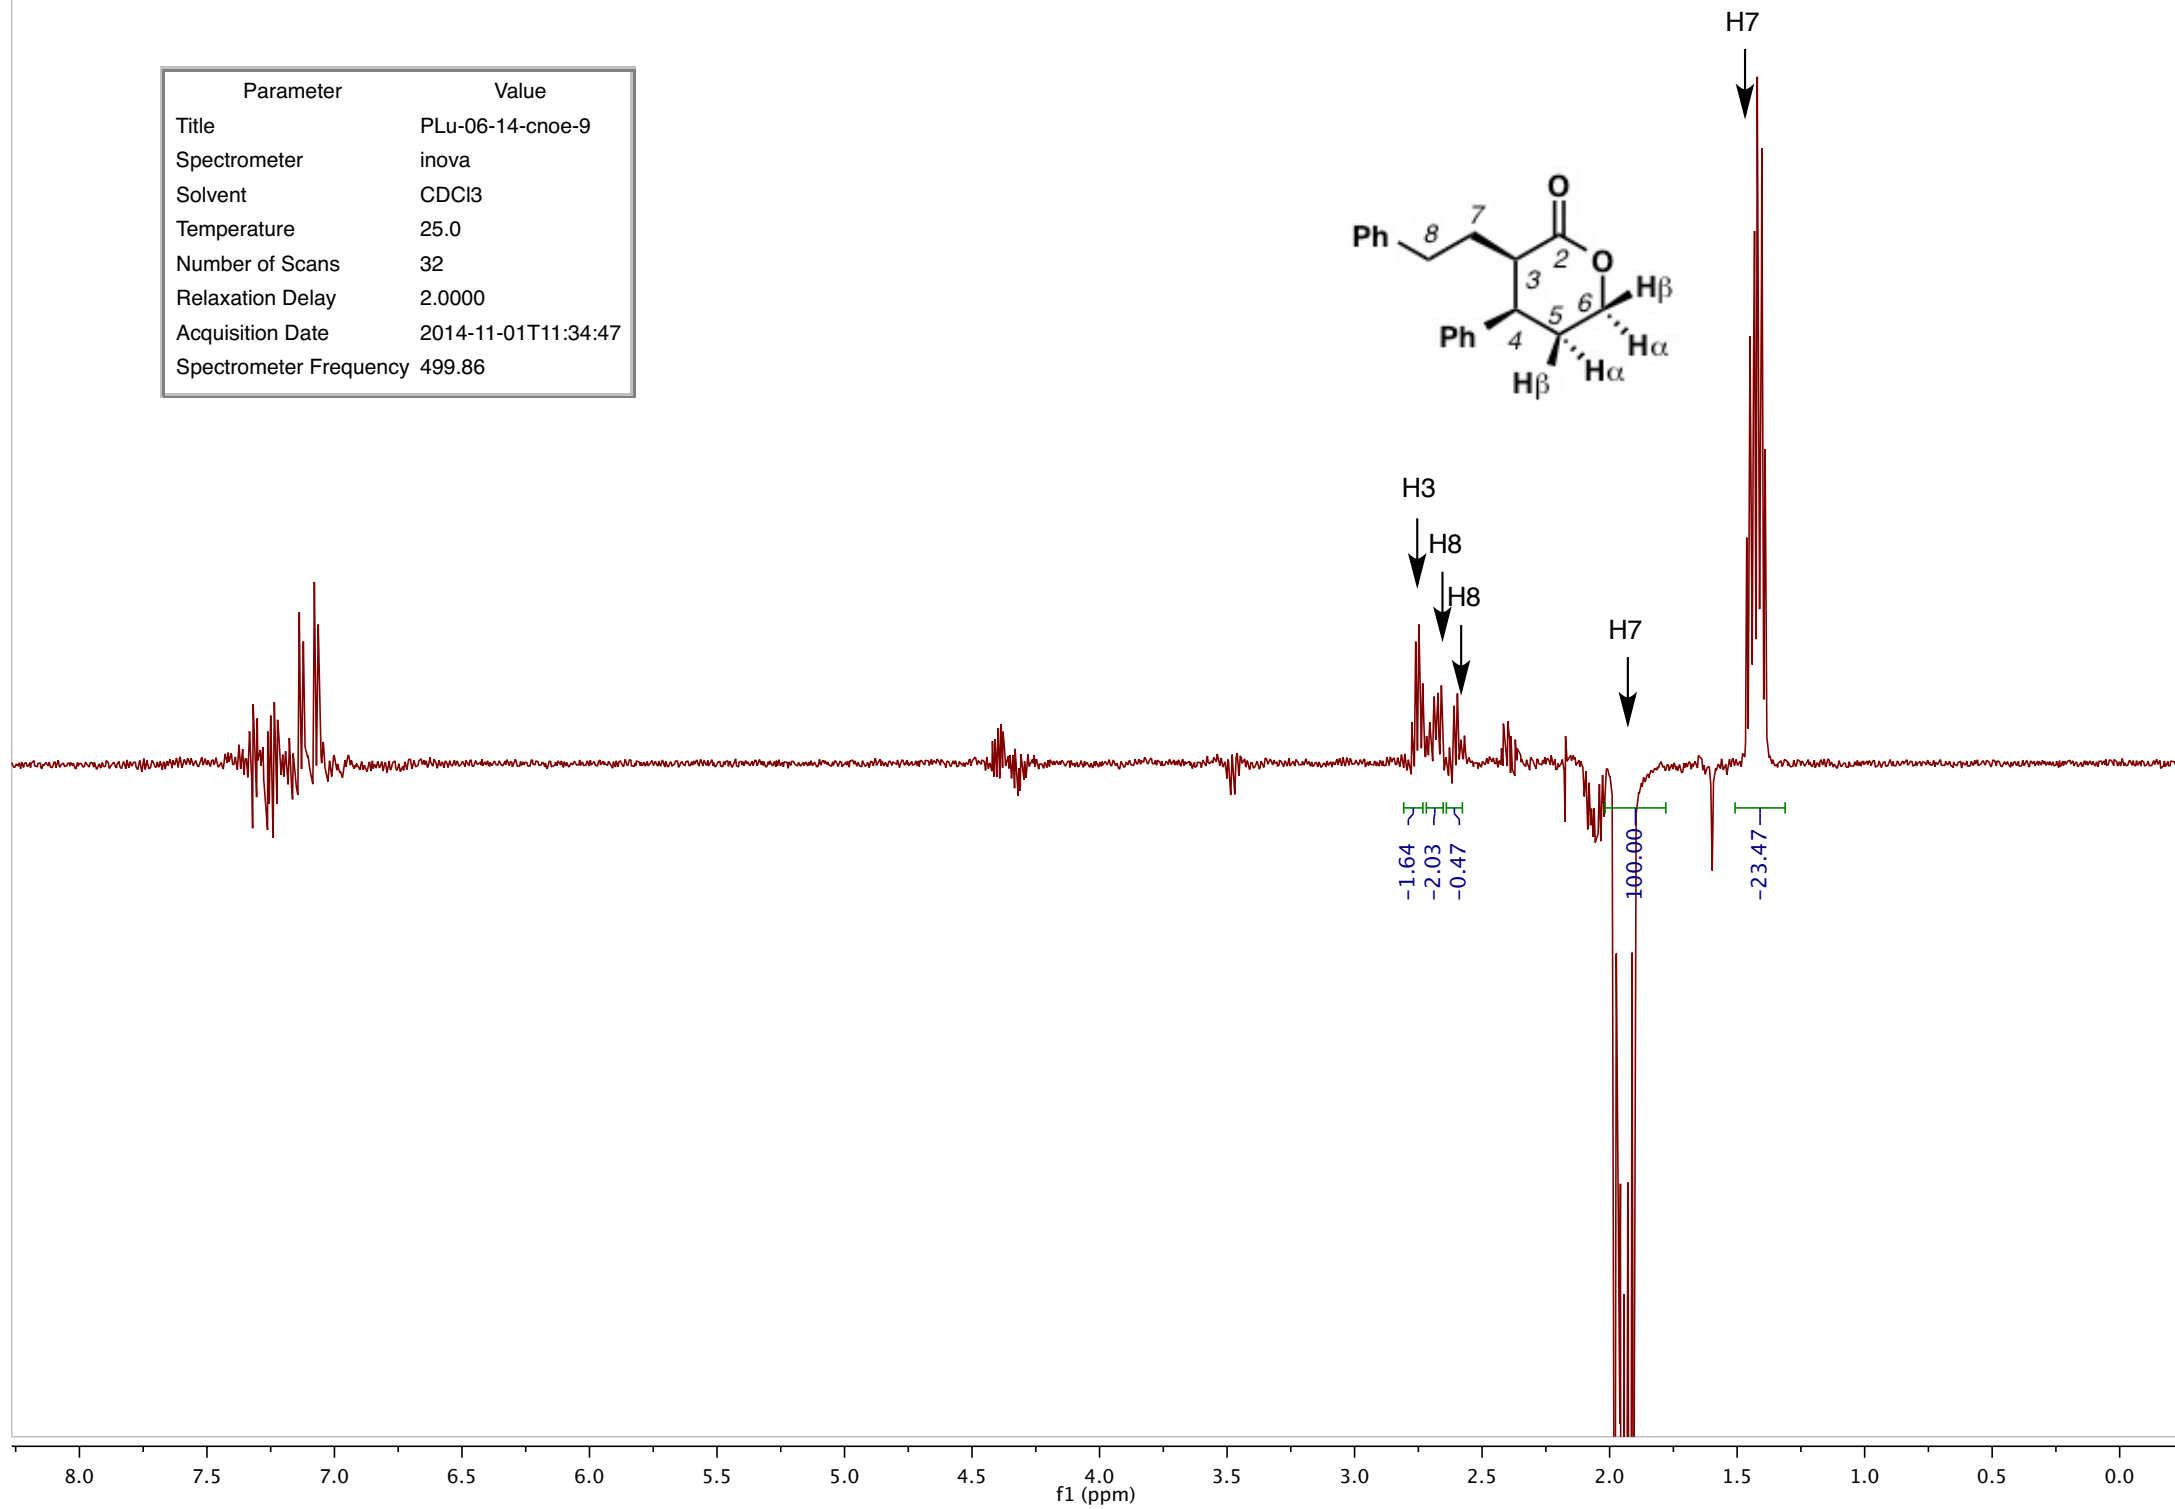

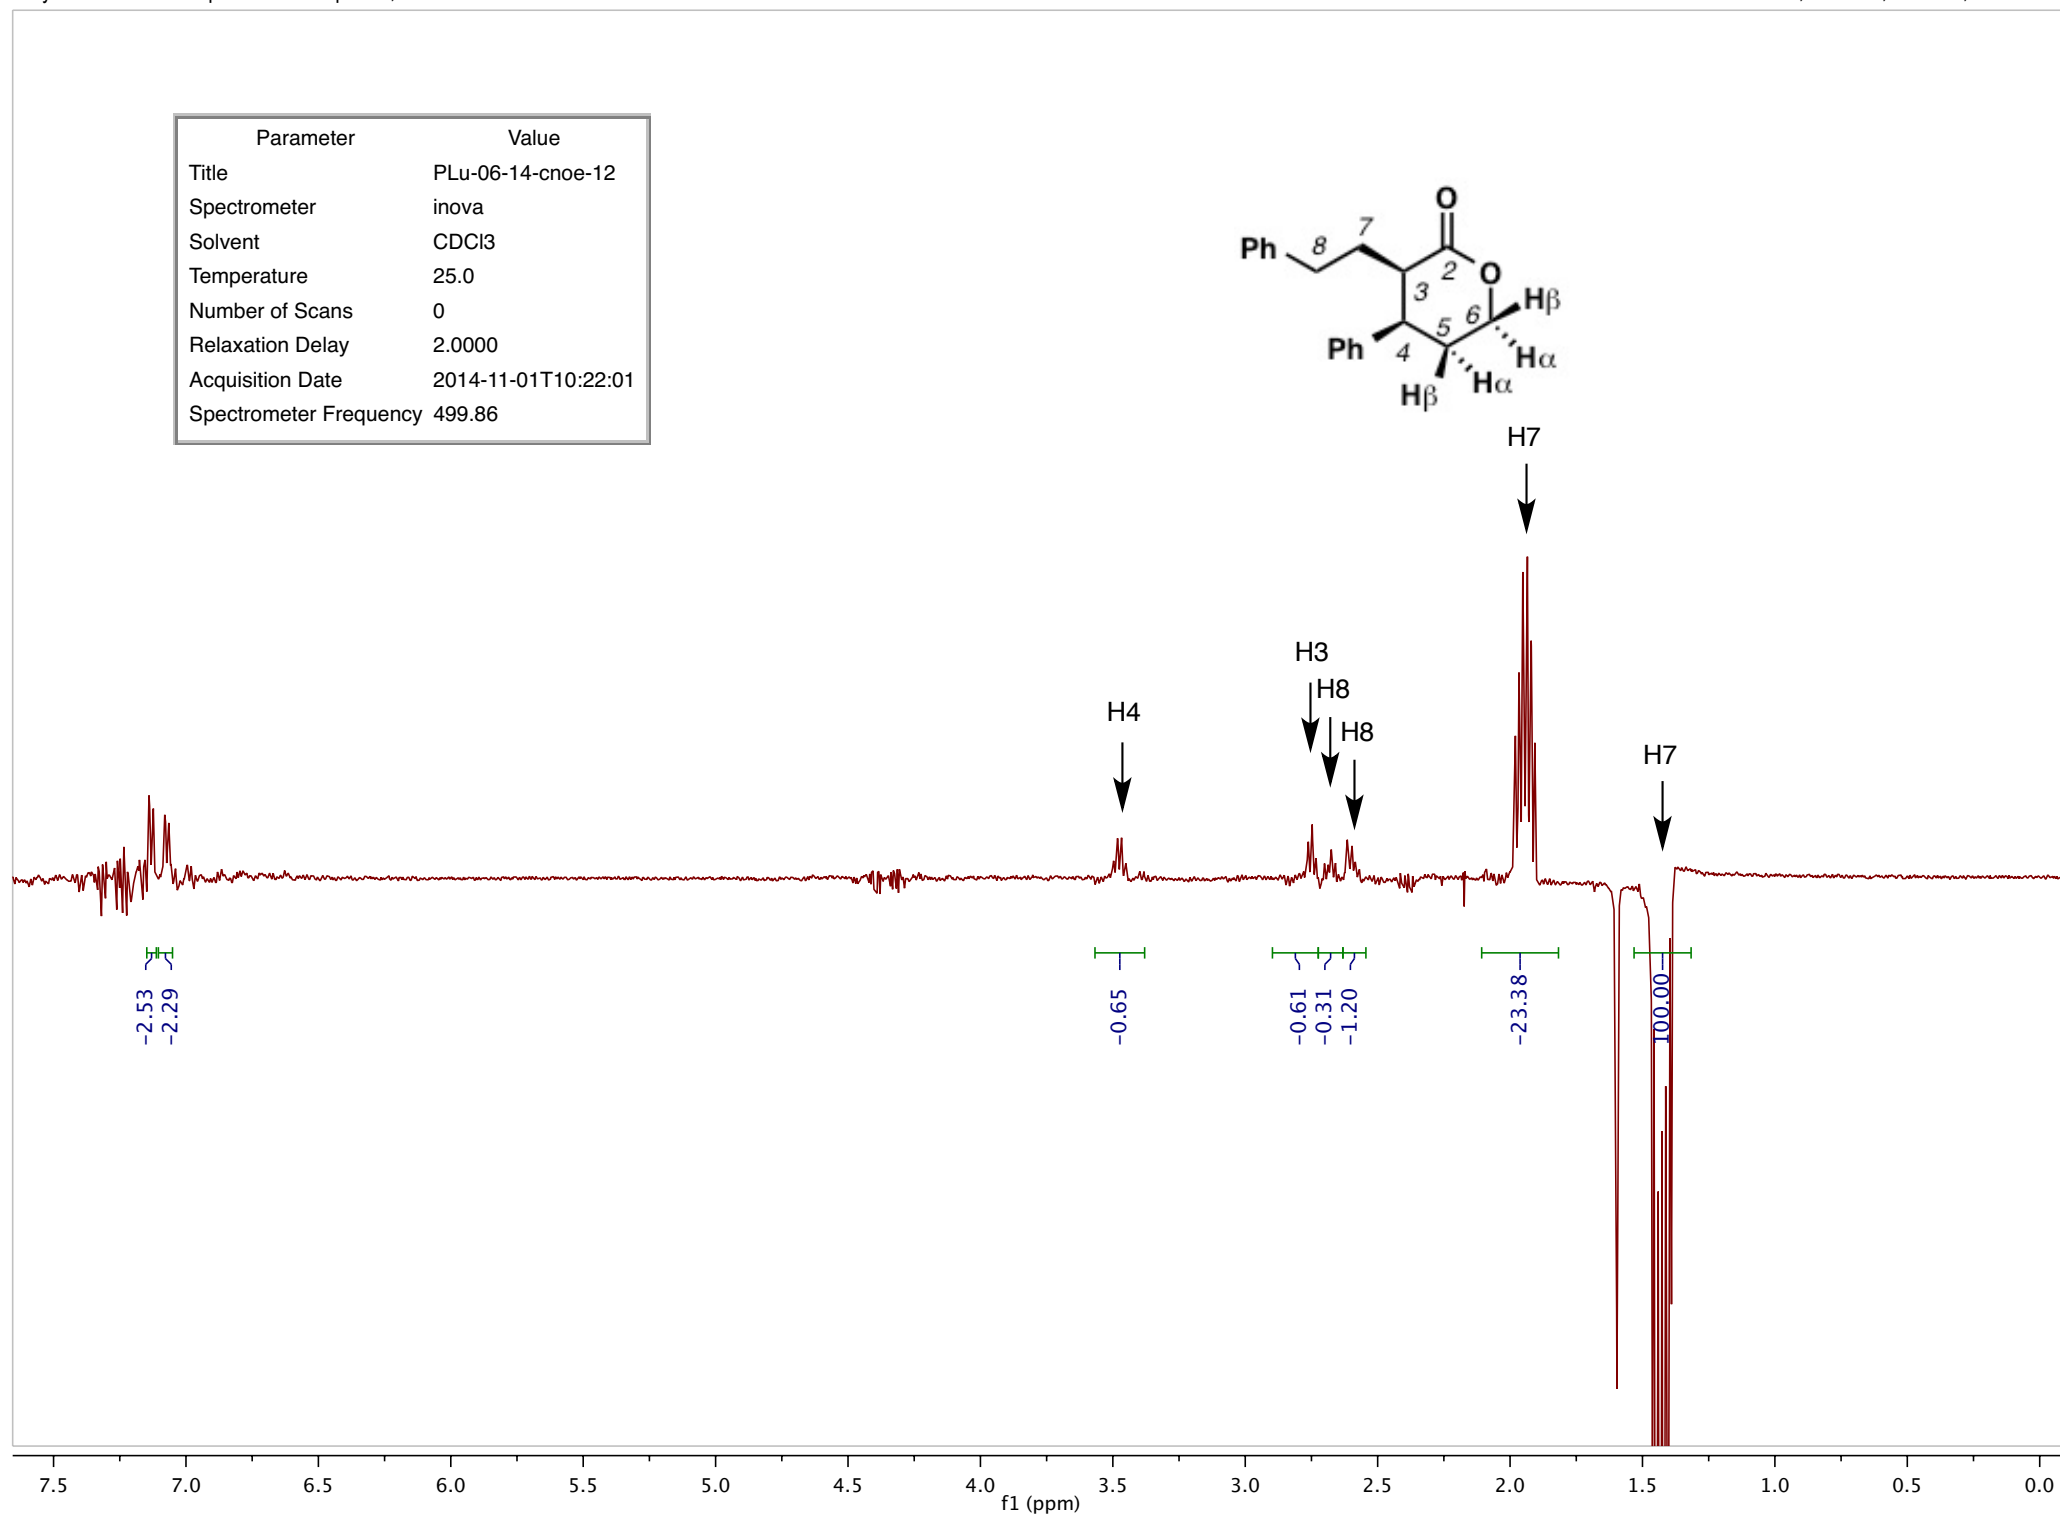

| Parameter              | Value               |
|------------------------|---------------------|
| Title                  | PLu-05-164-1H       |
| Spectrometer           | inova               |
| Solvent                | CDCl <sub>3</sub>   |
| Temperature            | 25.0                |
| Number of Scans        | 16                  |
| Relaxation Delay       | 4.8000              |
| Acquisition Time       | 2.5001              |
| Acquisition Date       | 2014-07-12T18:00:36 |
| Spectrometer Frequency | 499.86              |

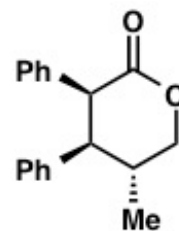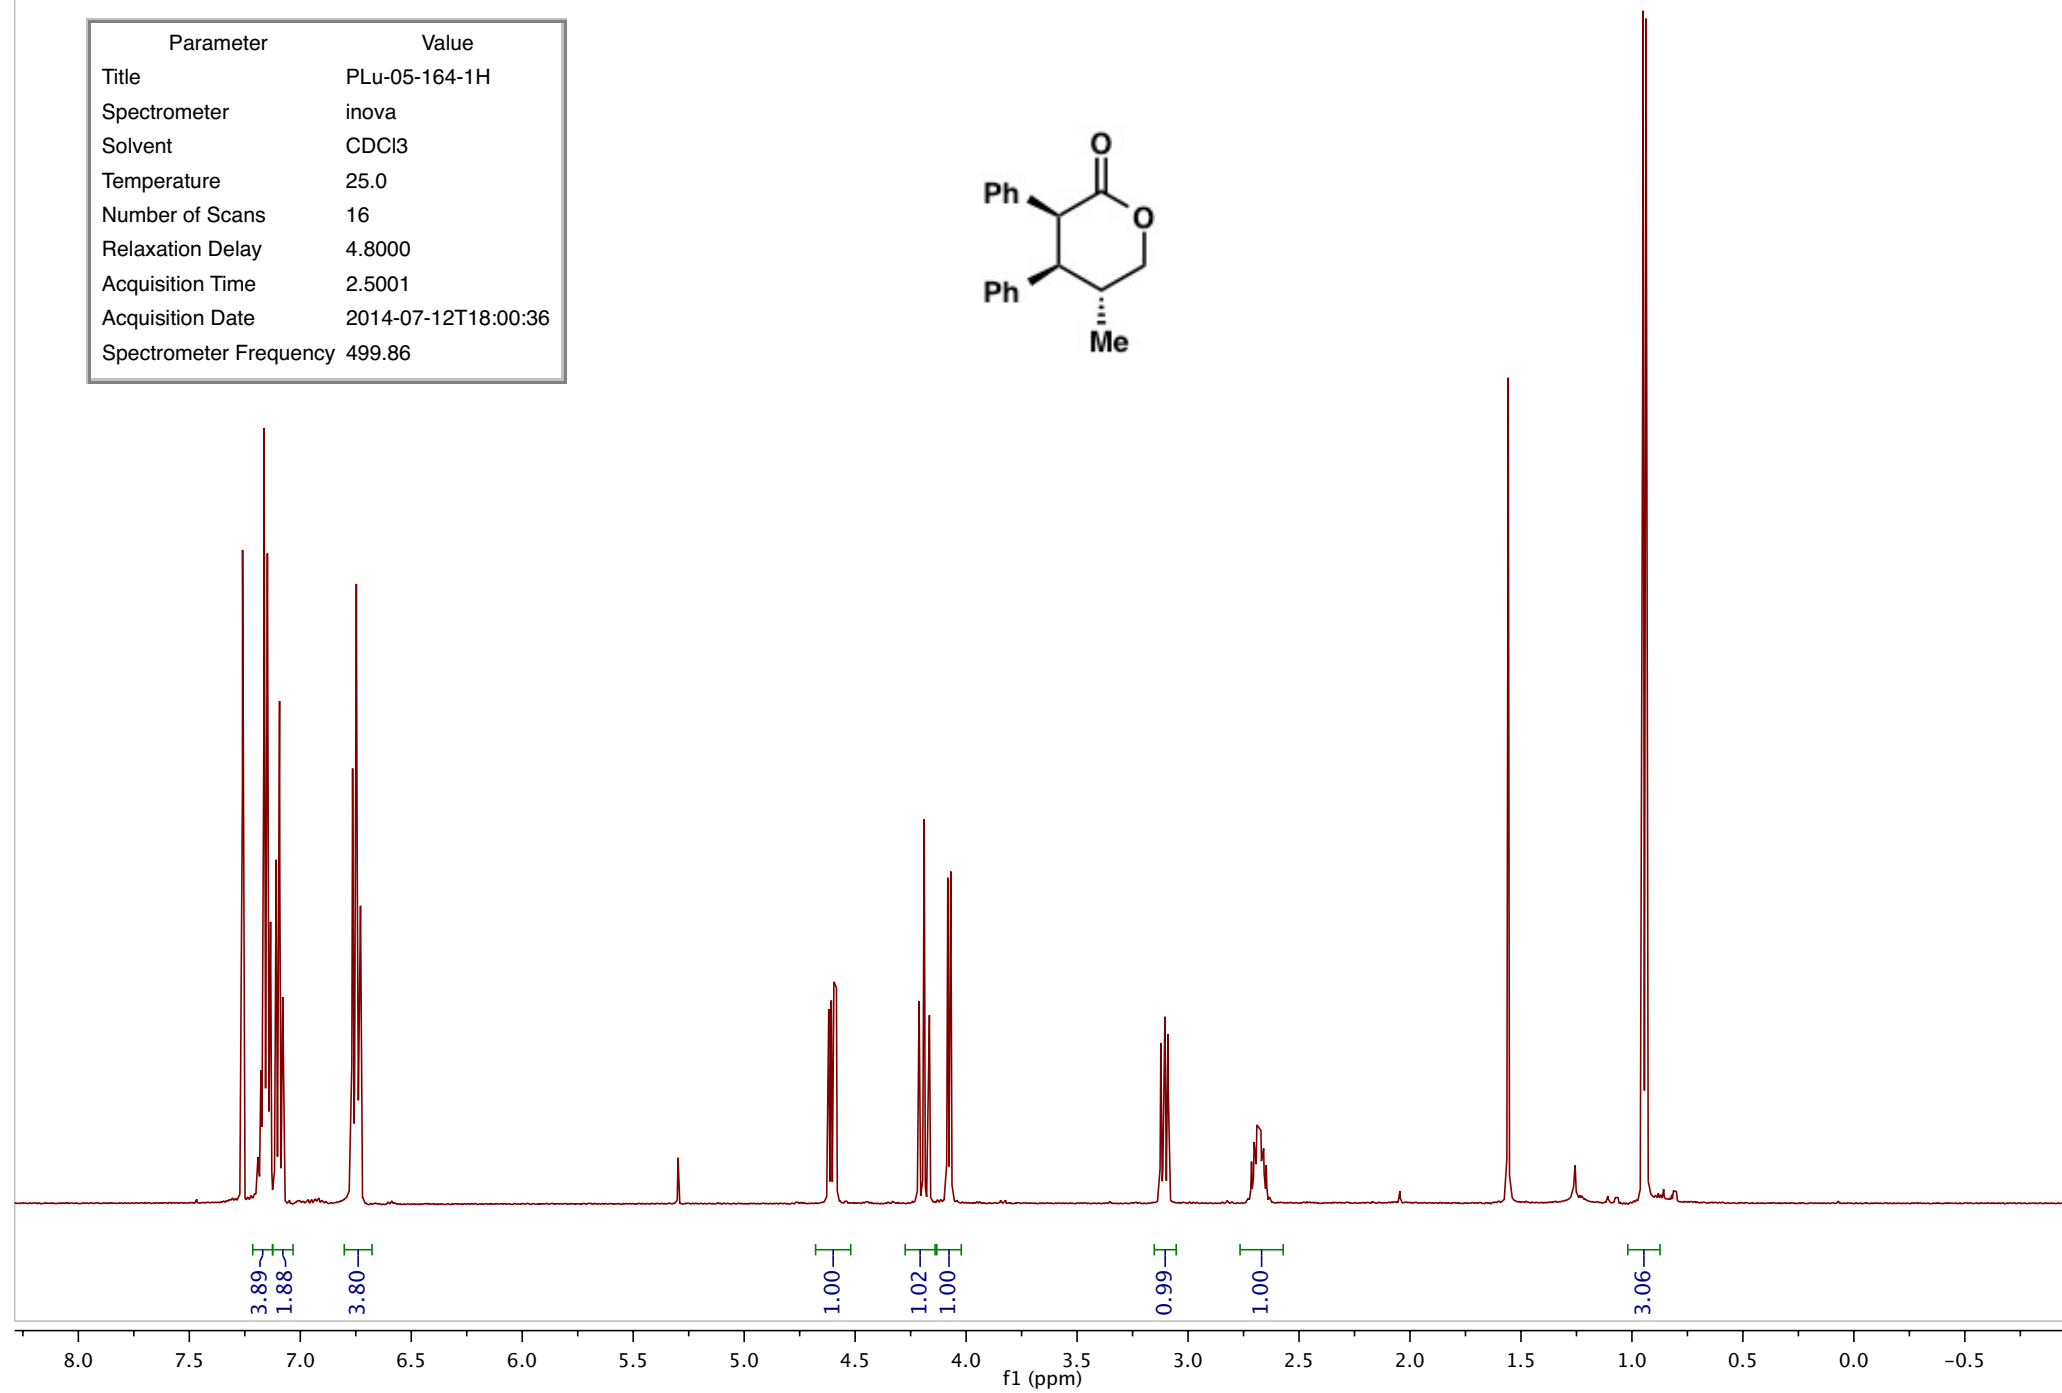

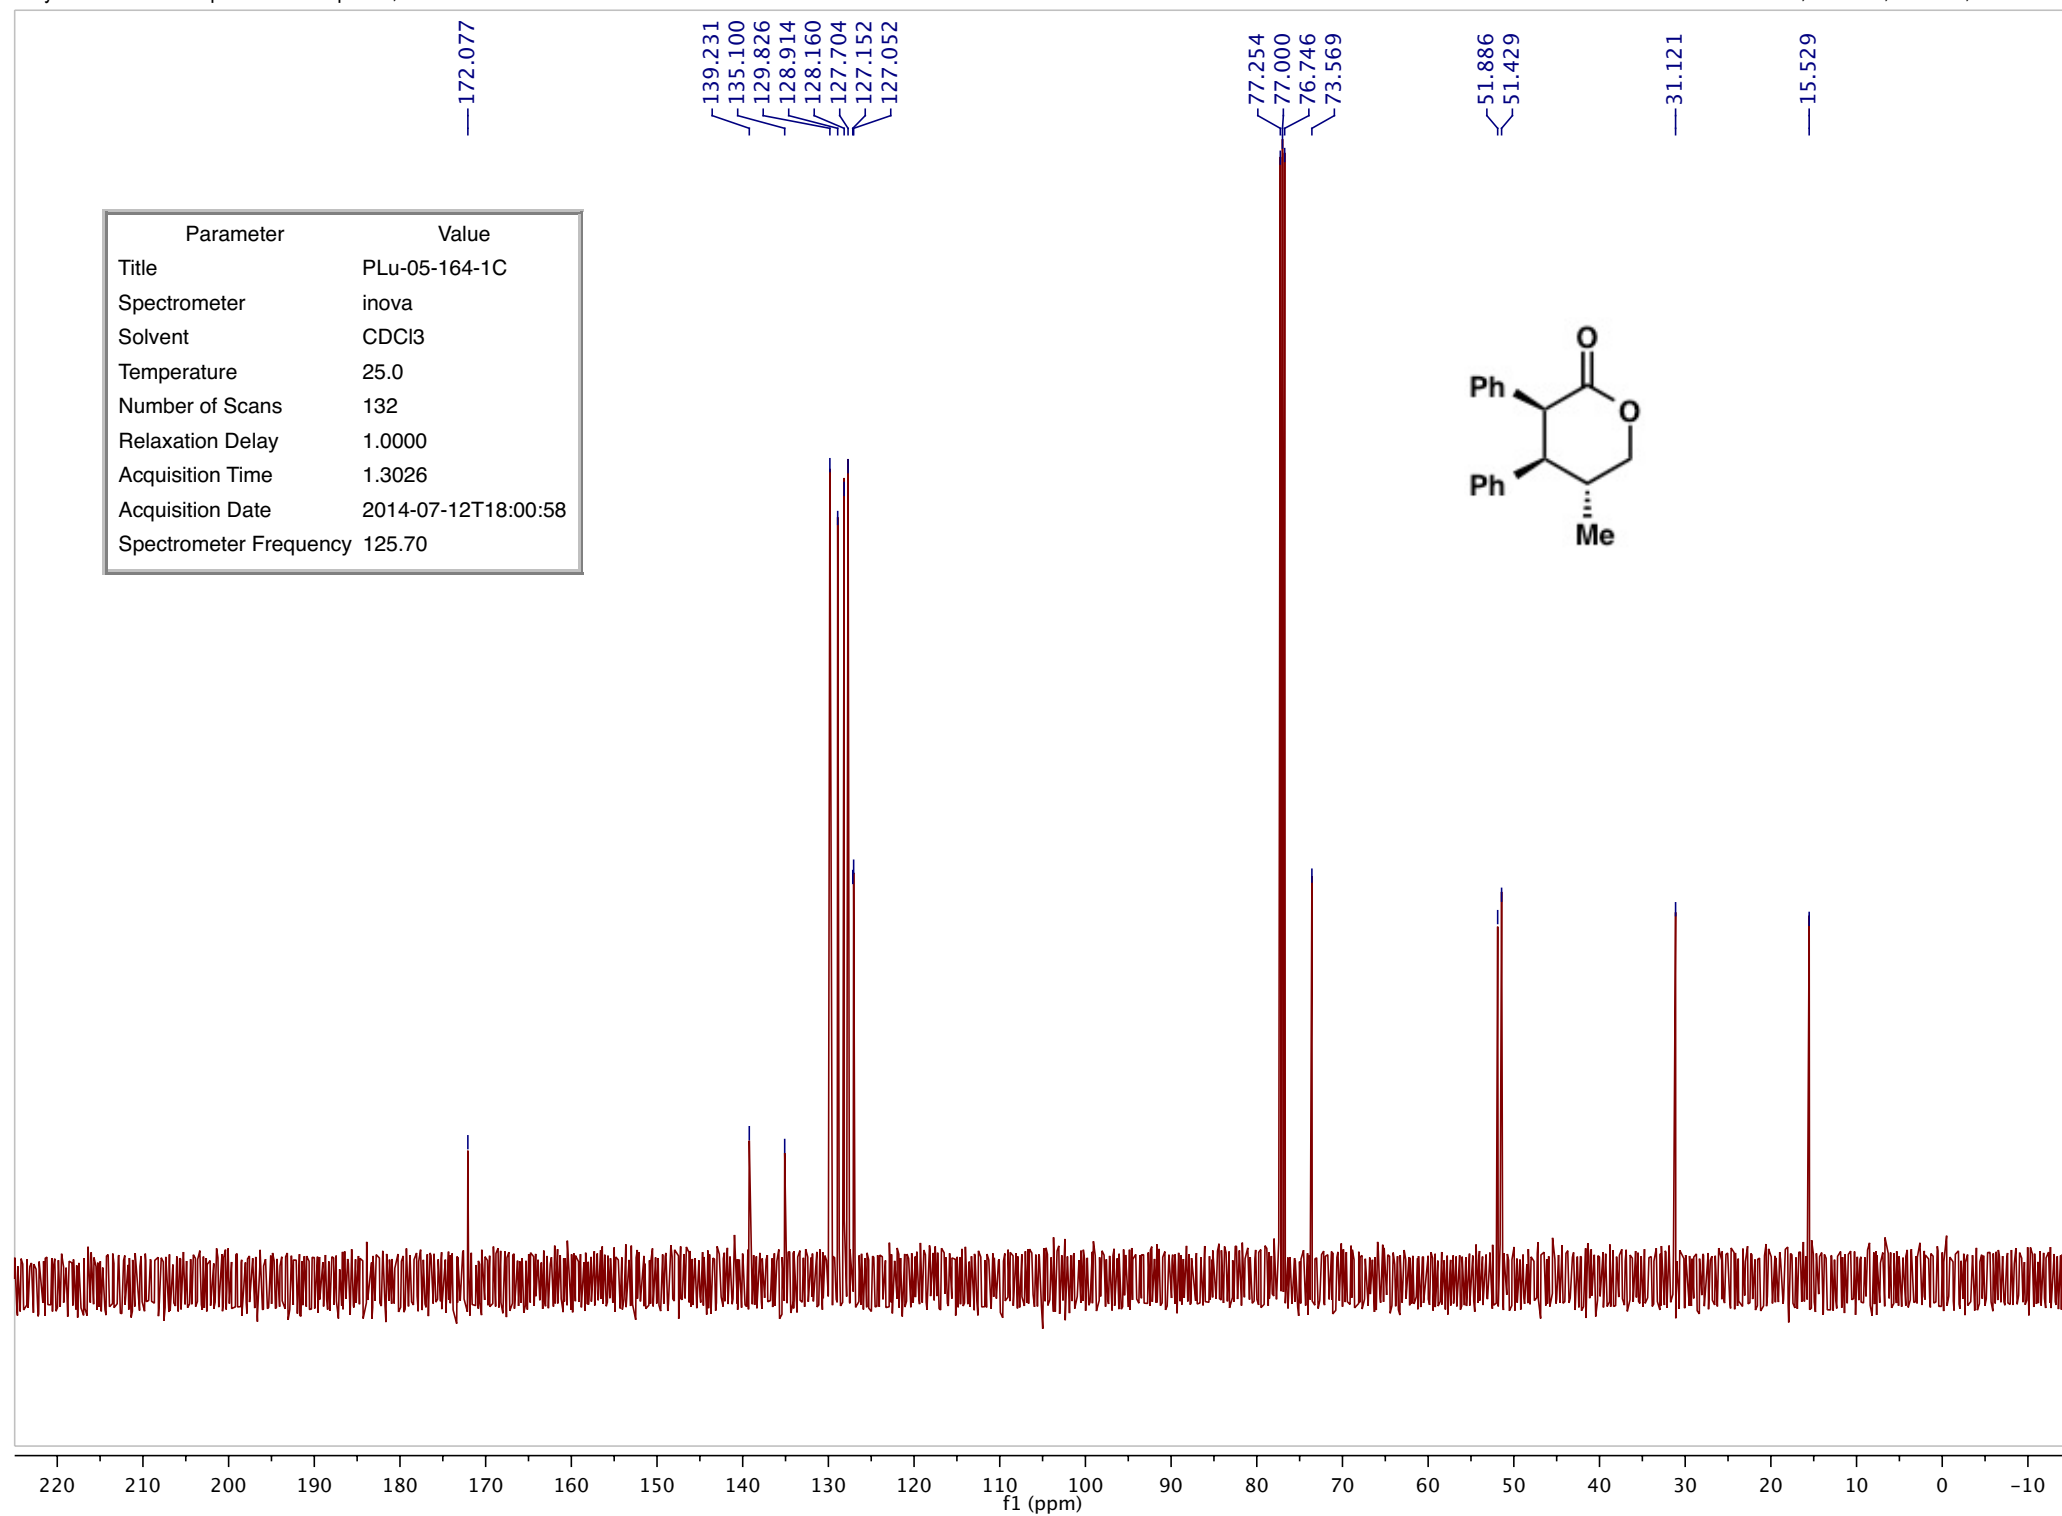

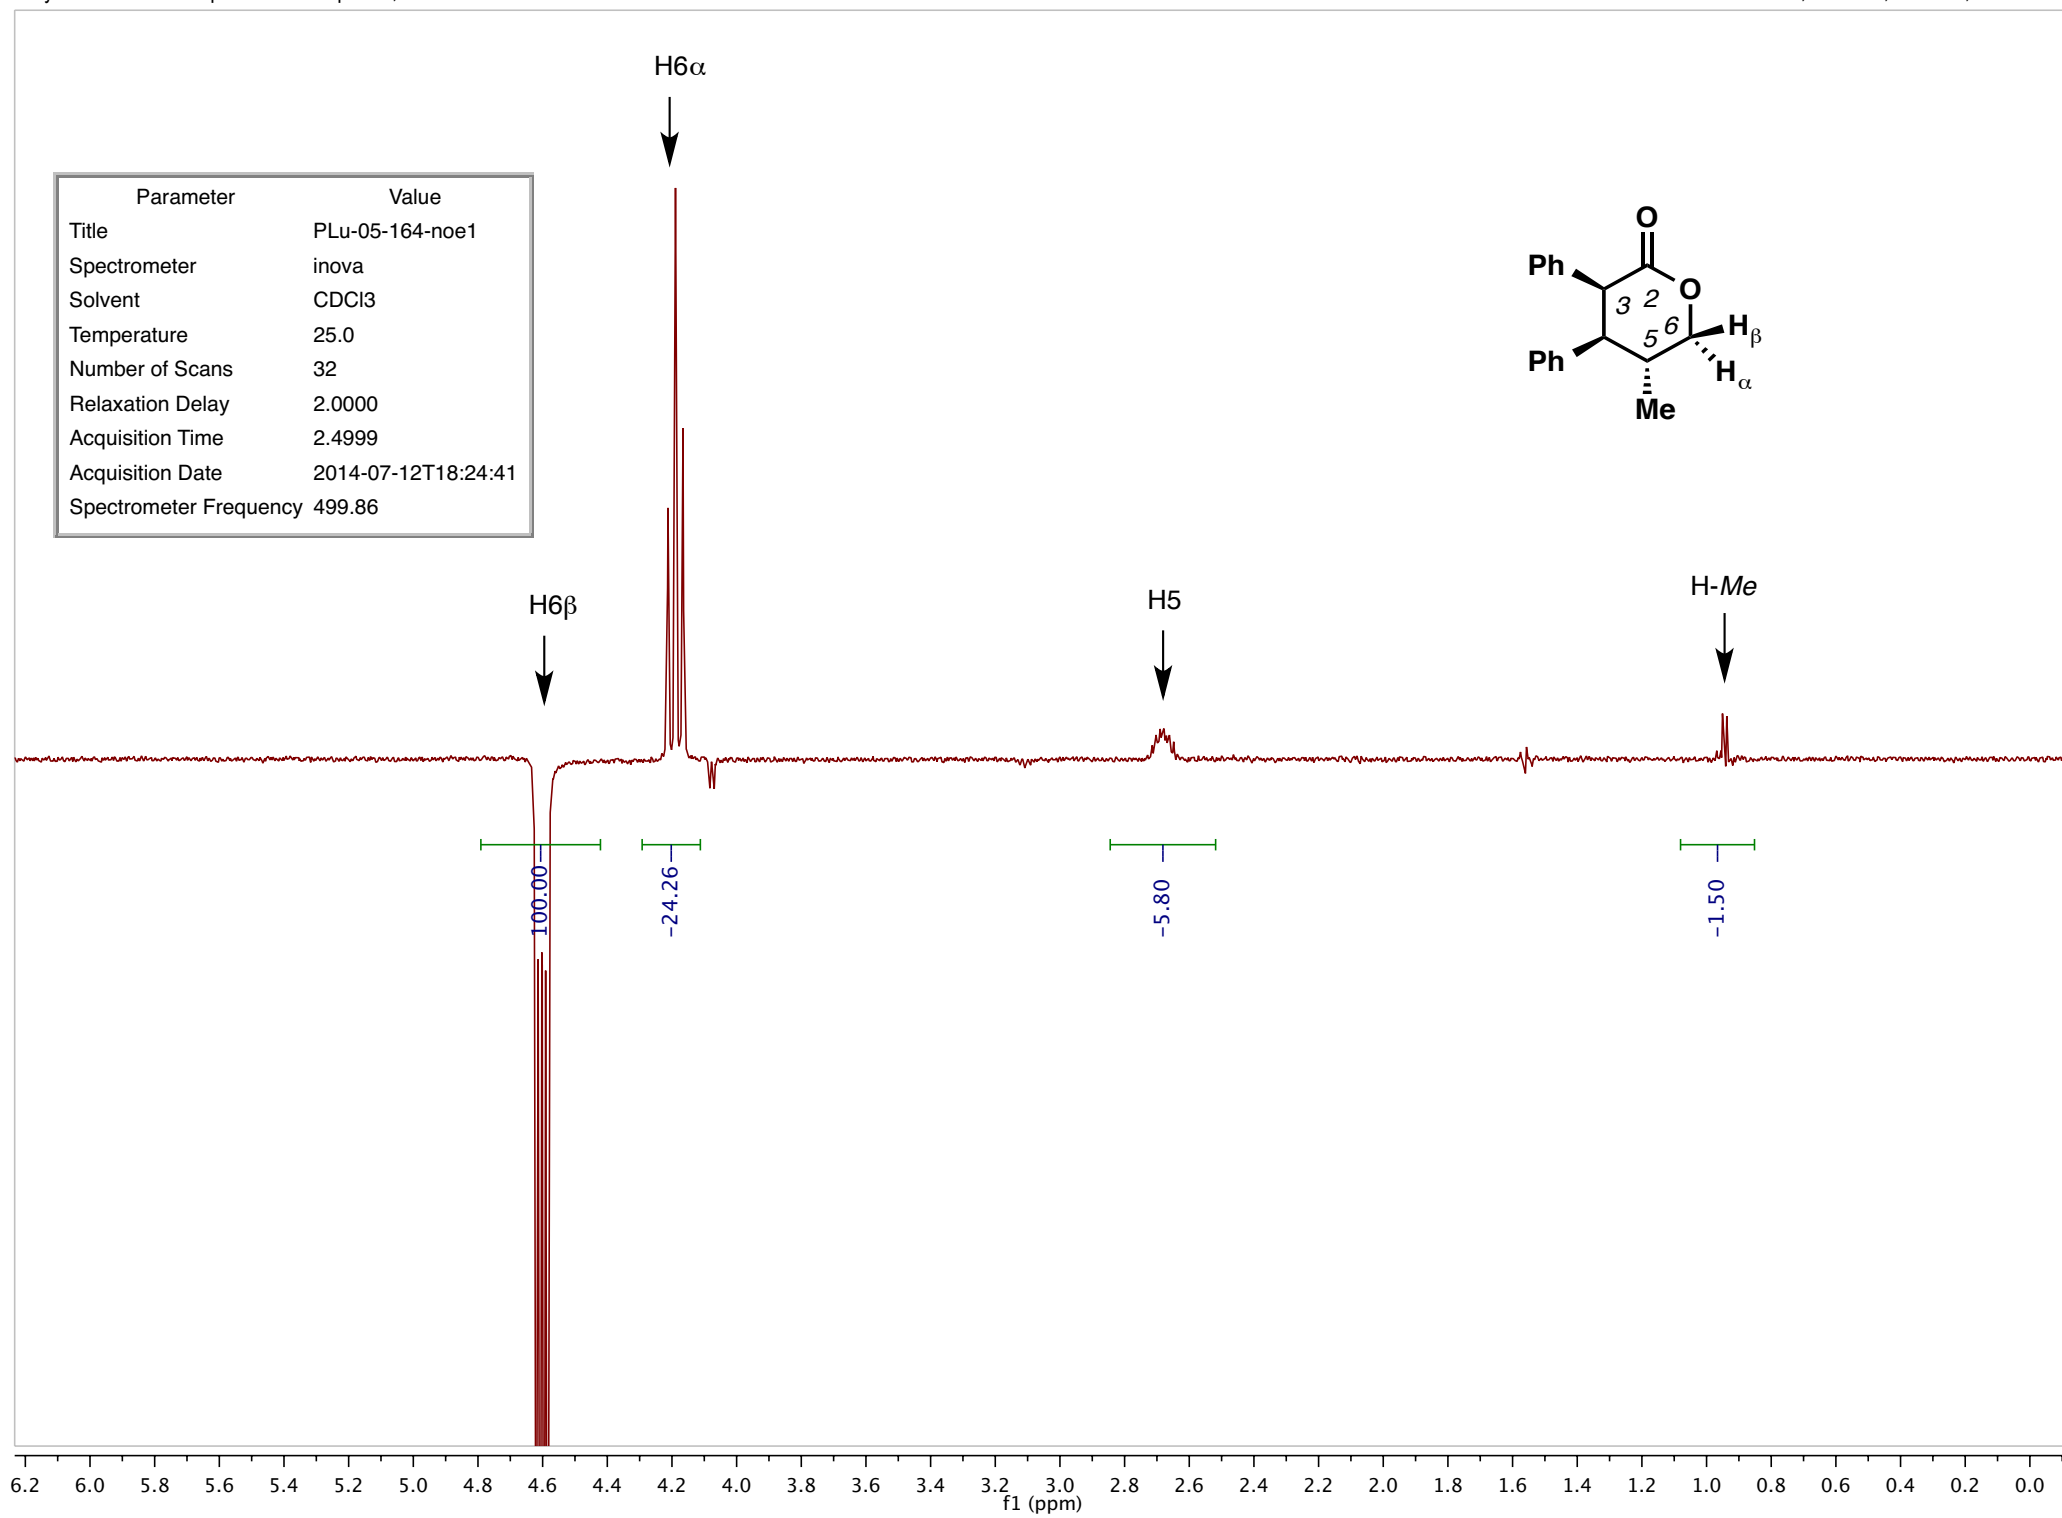

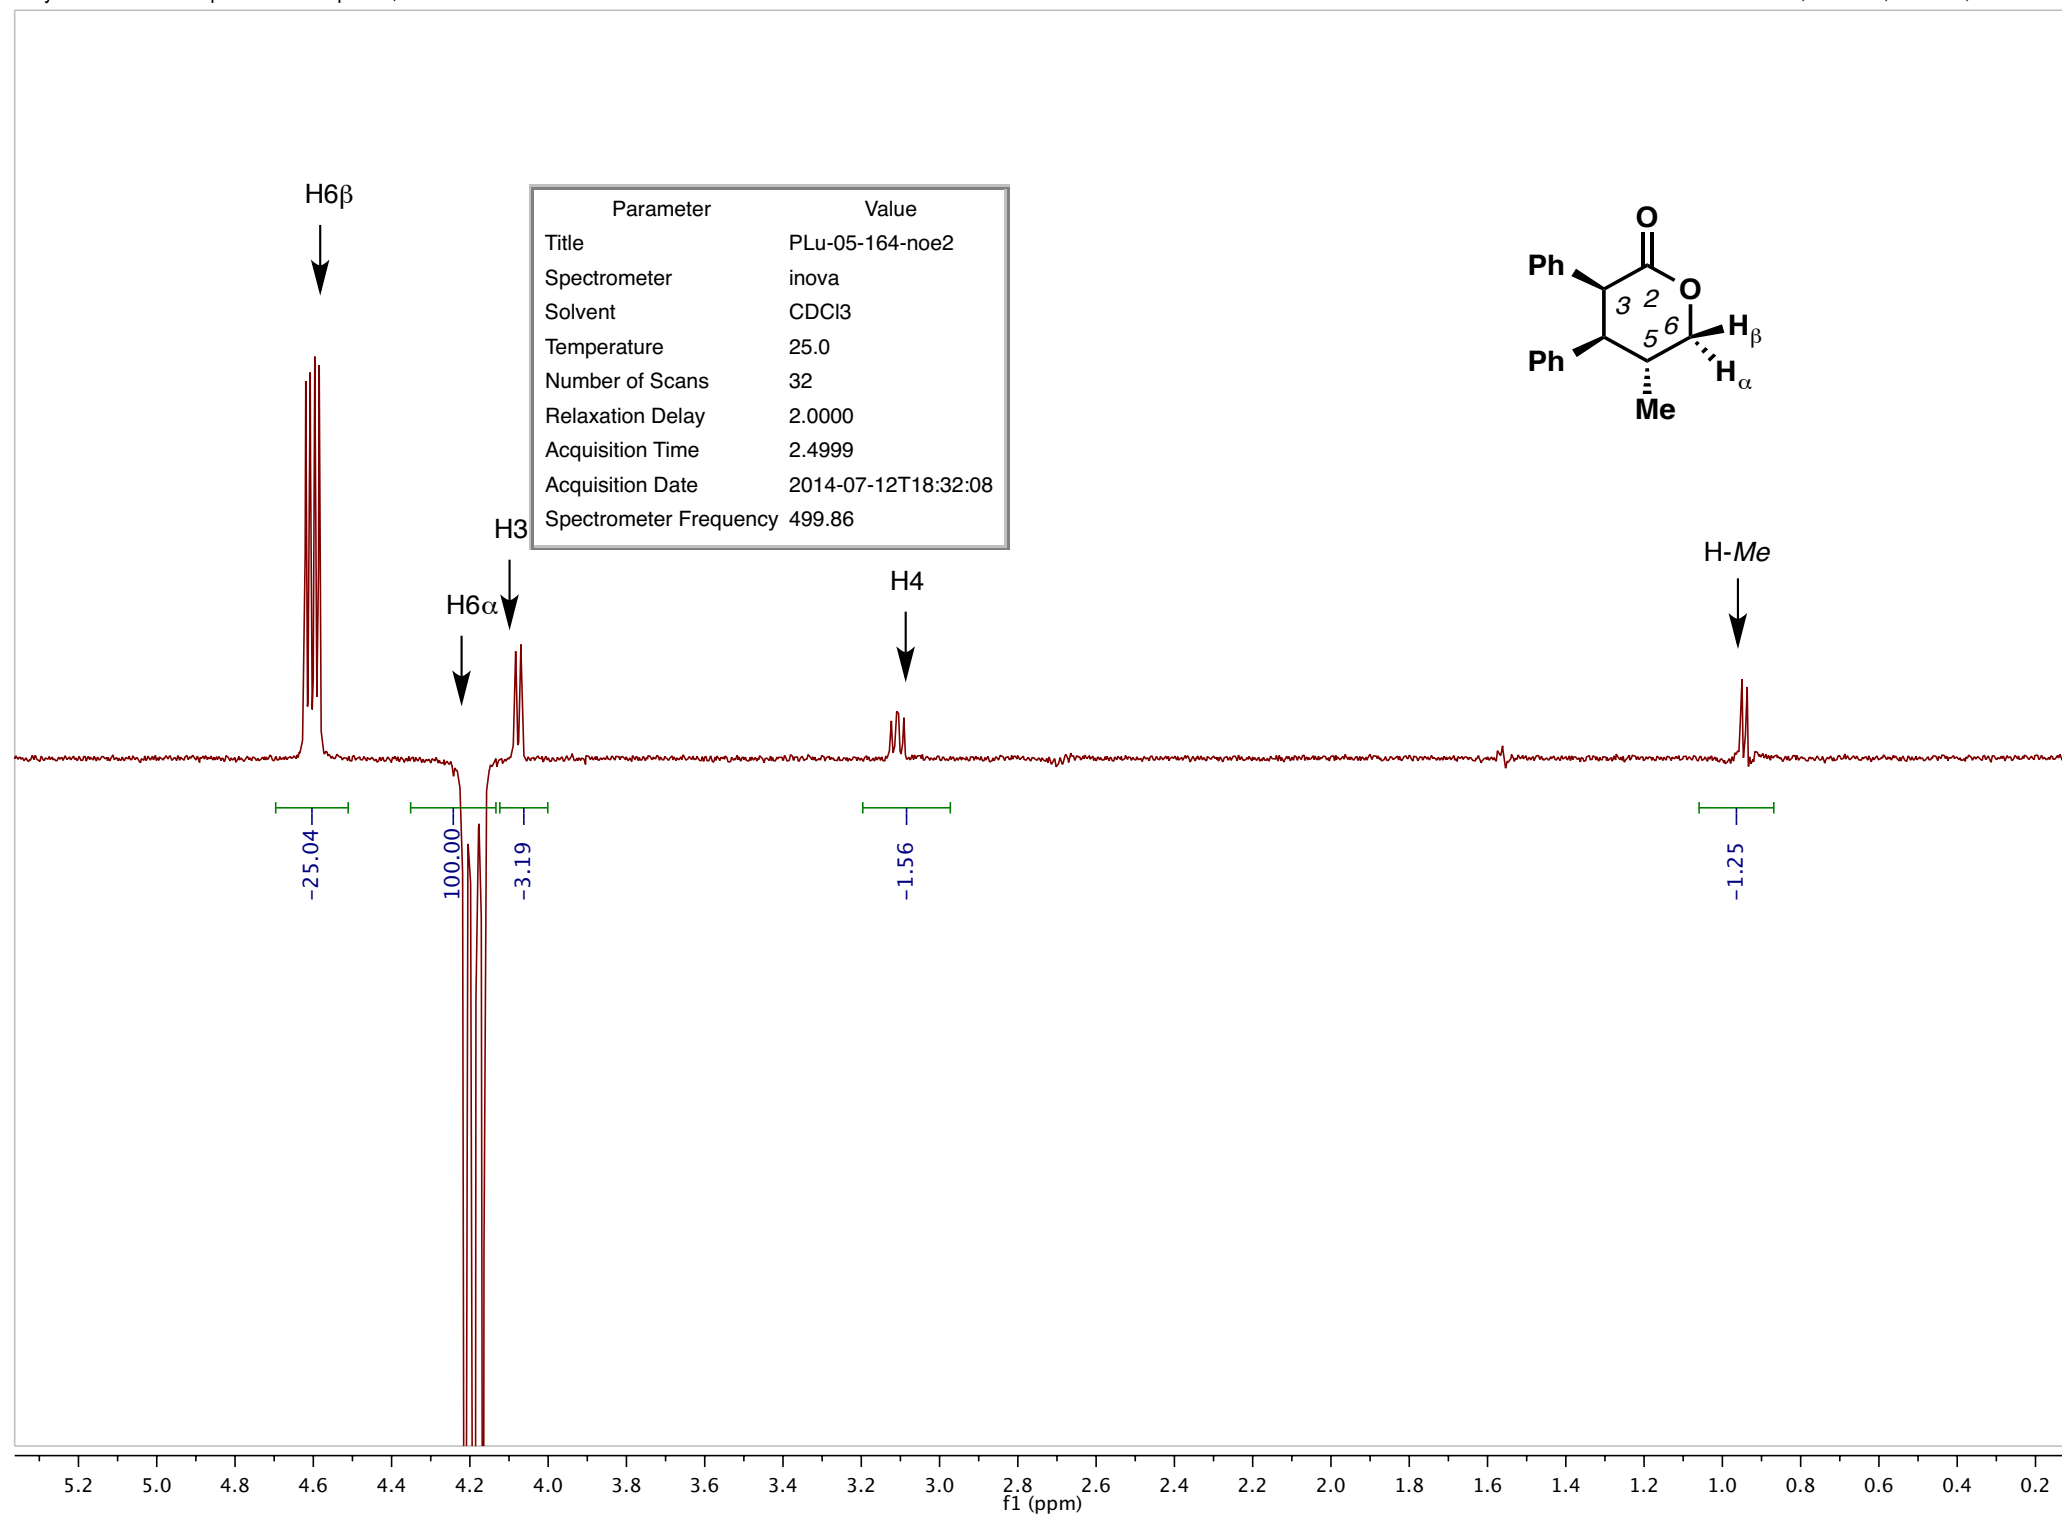

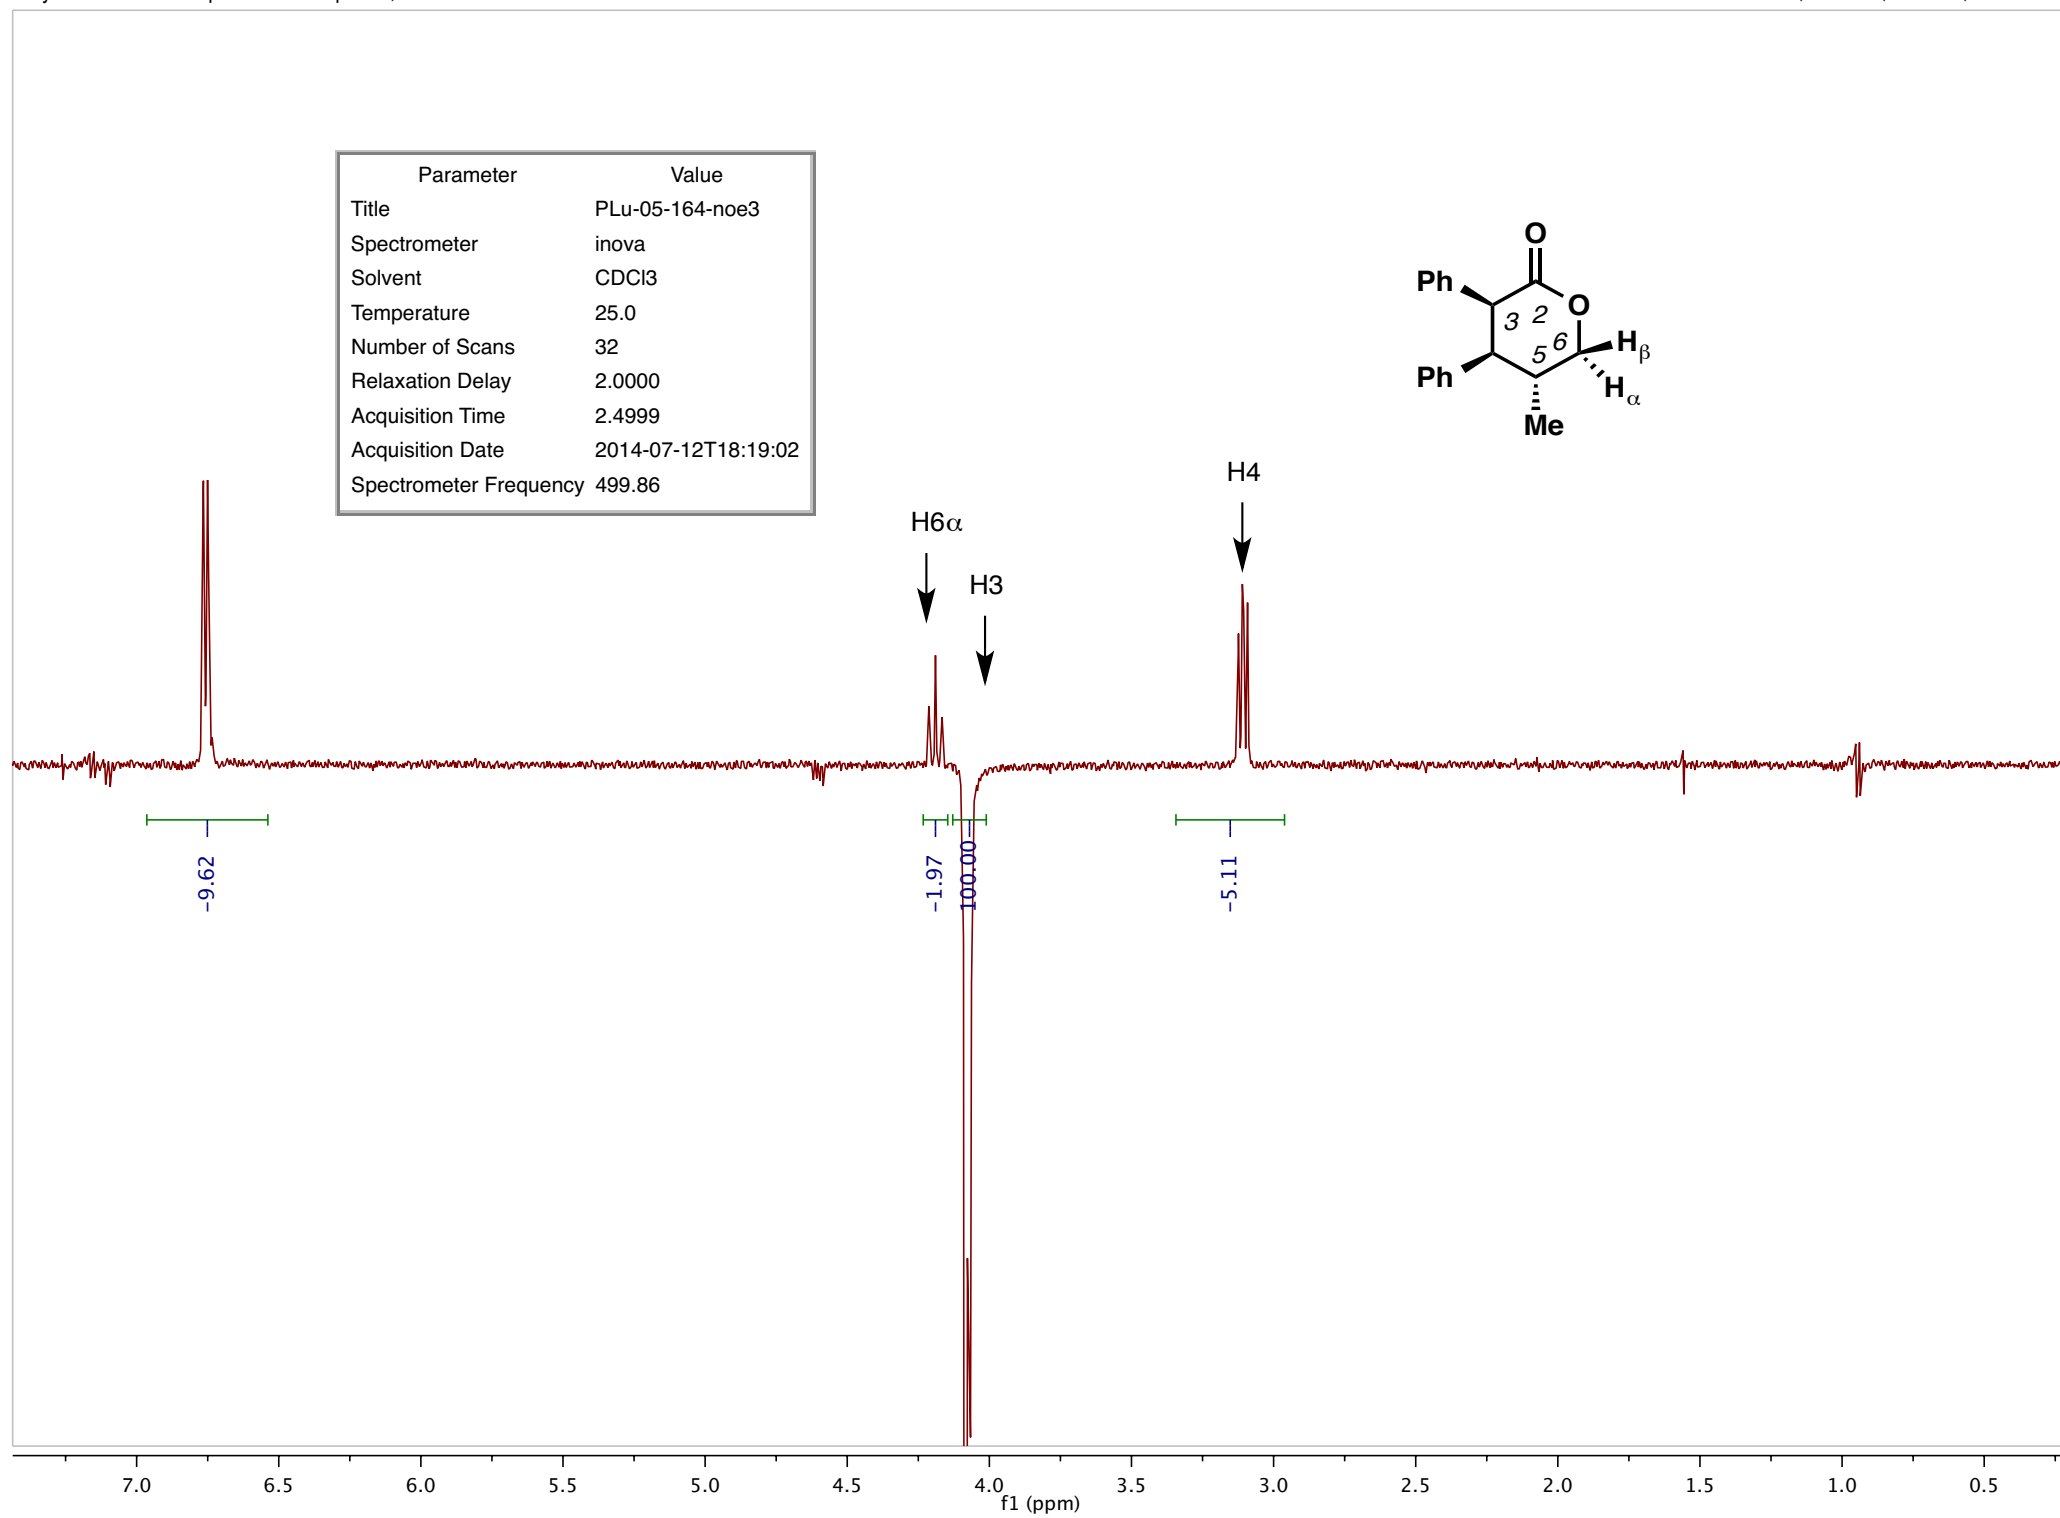



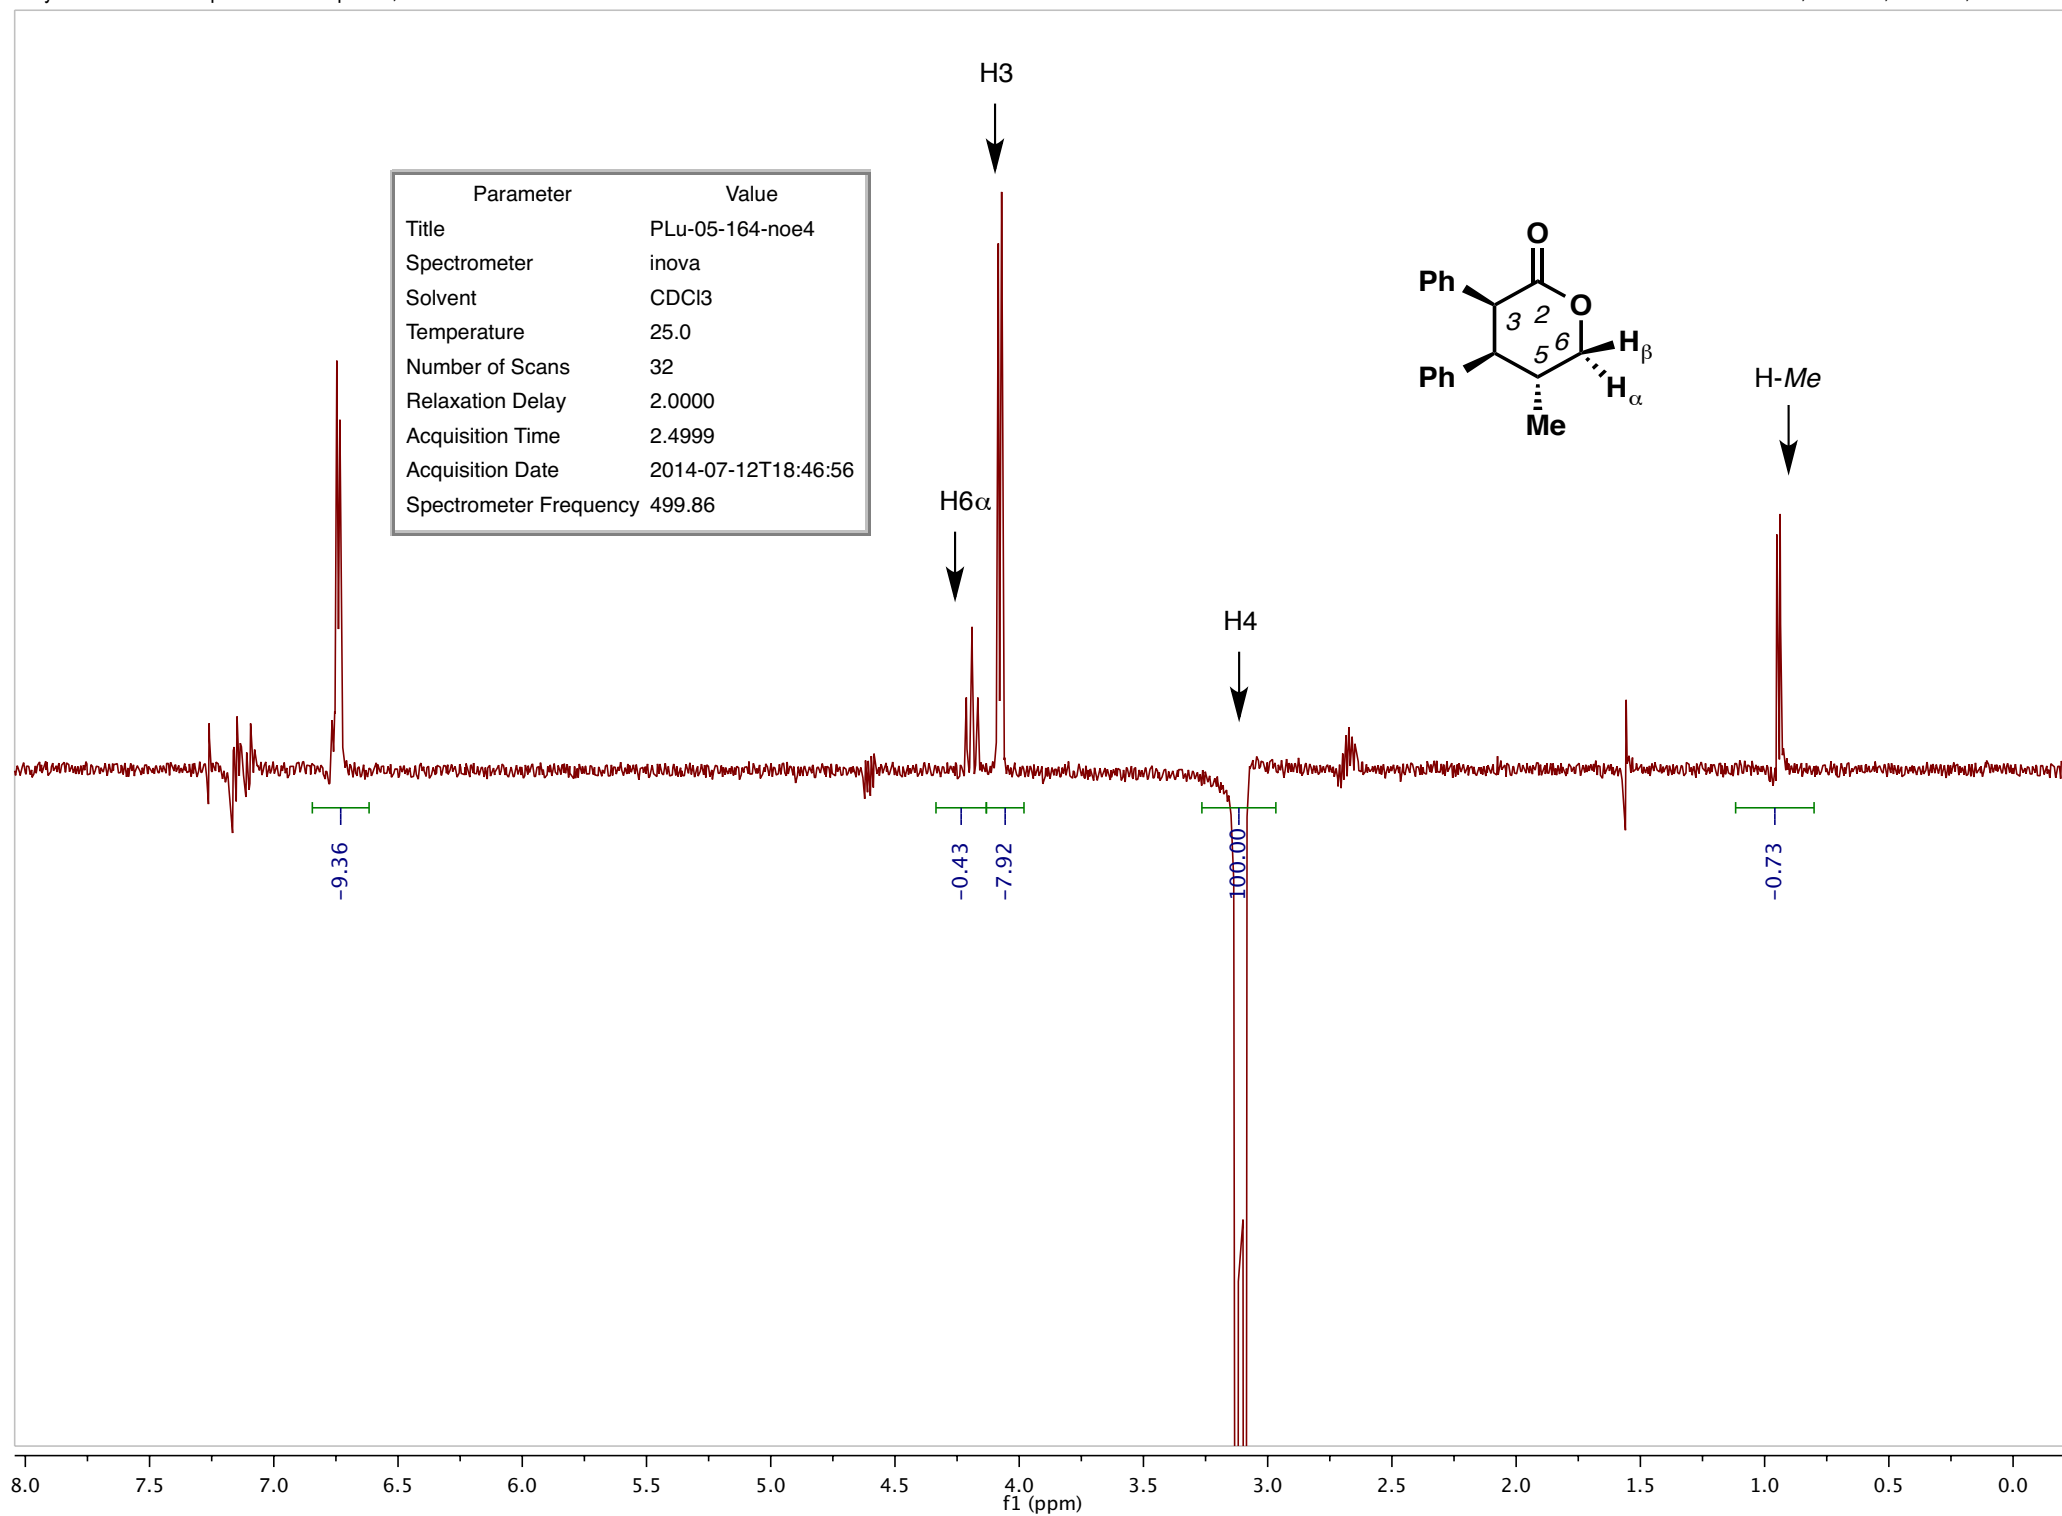

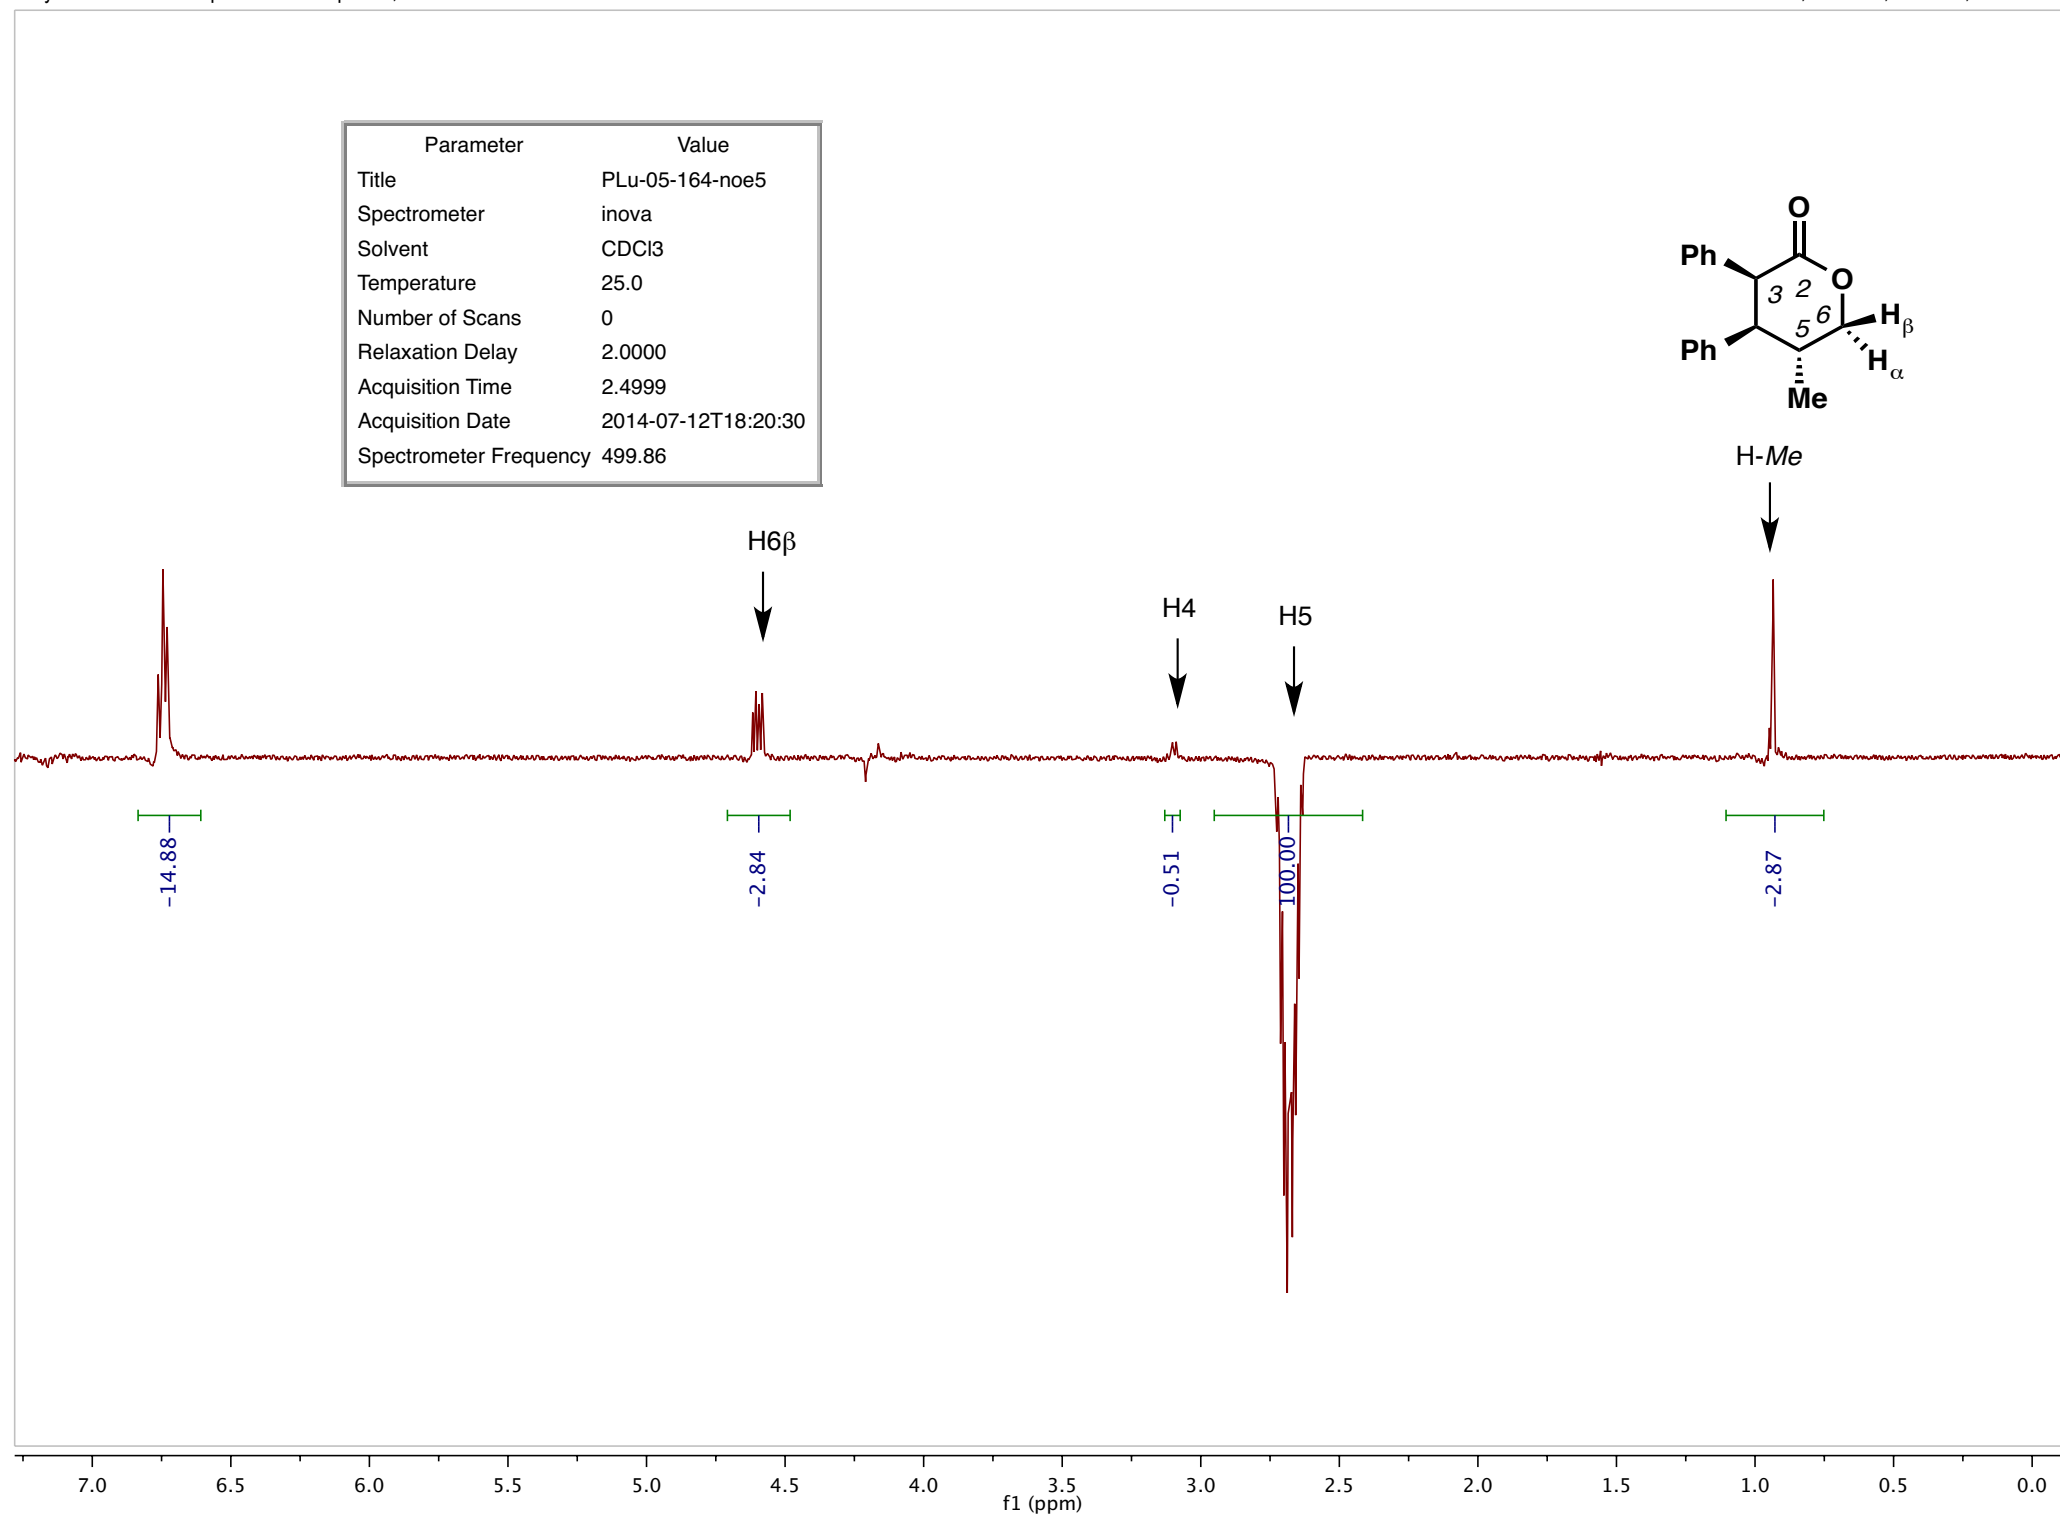

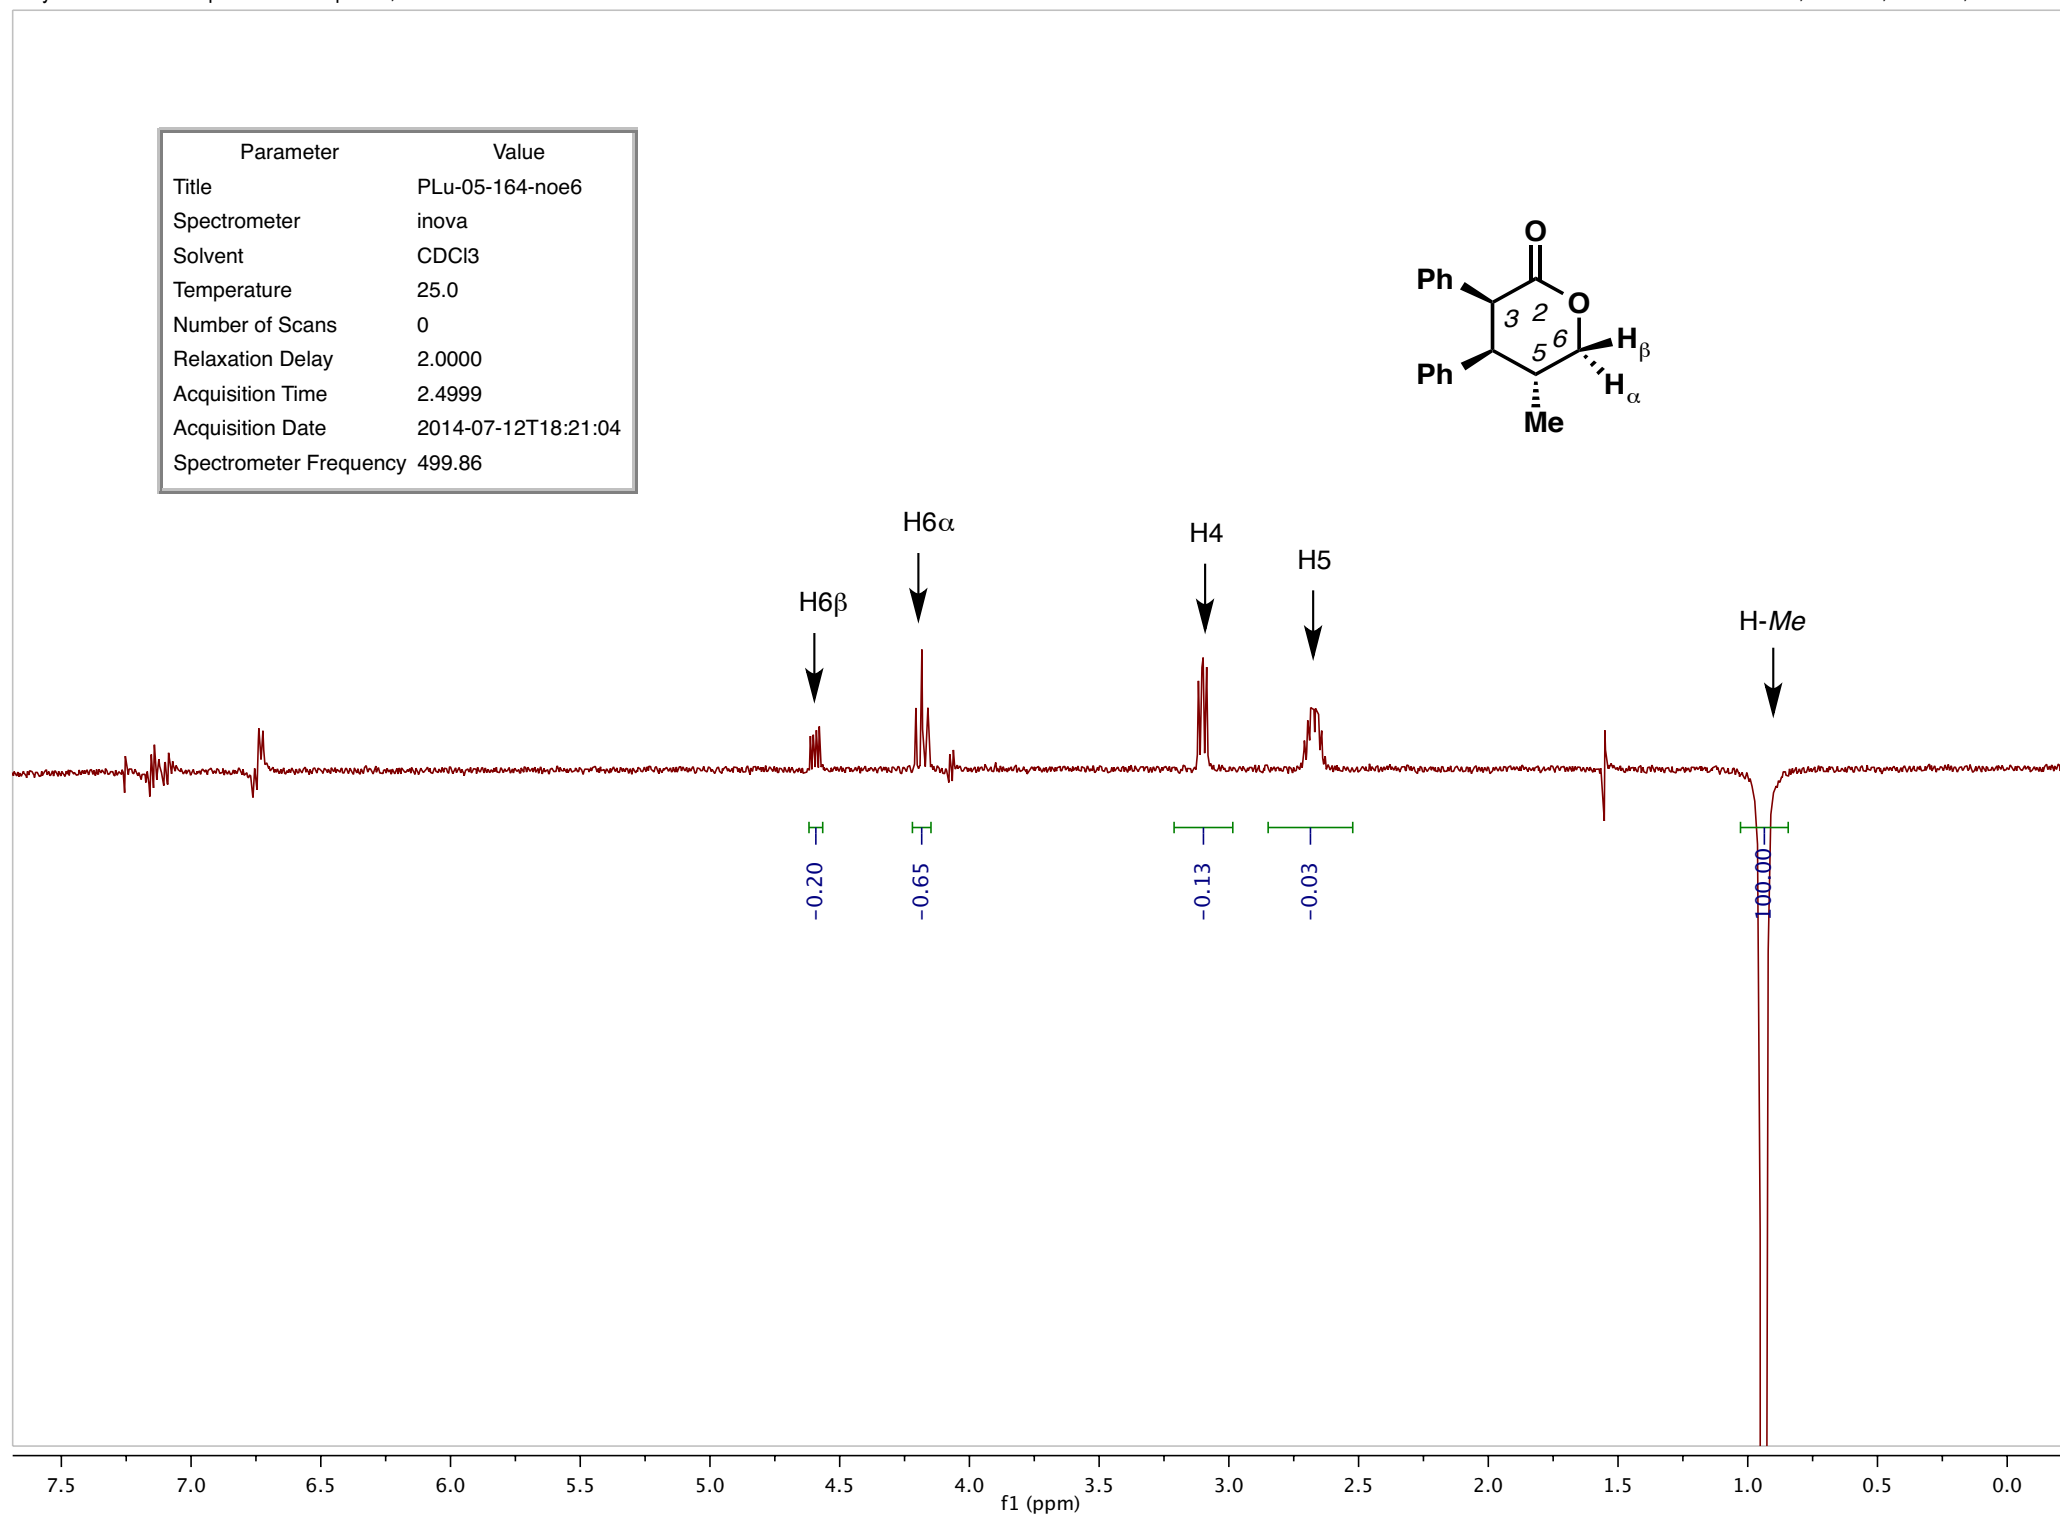

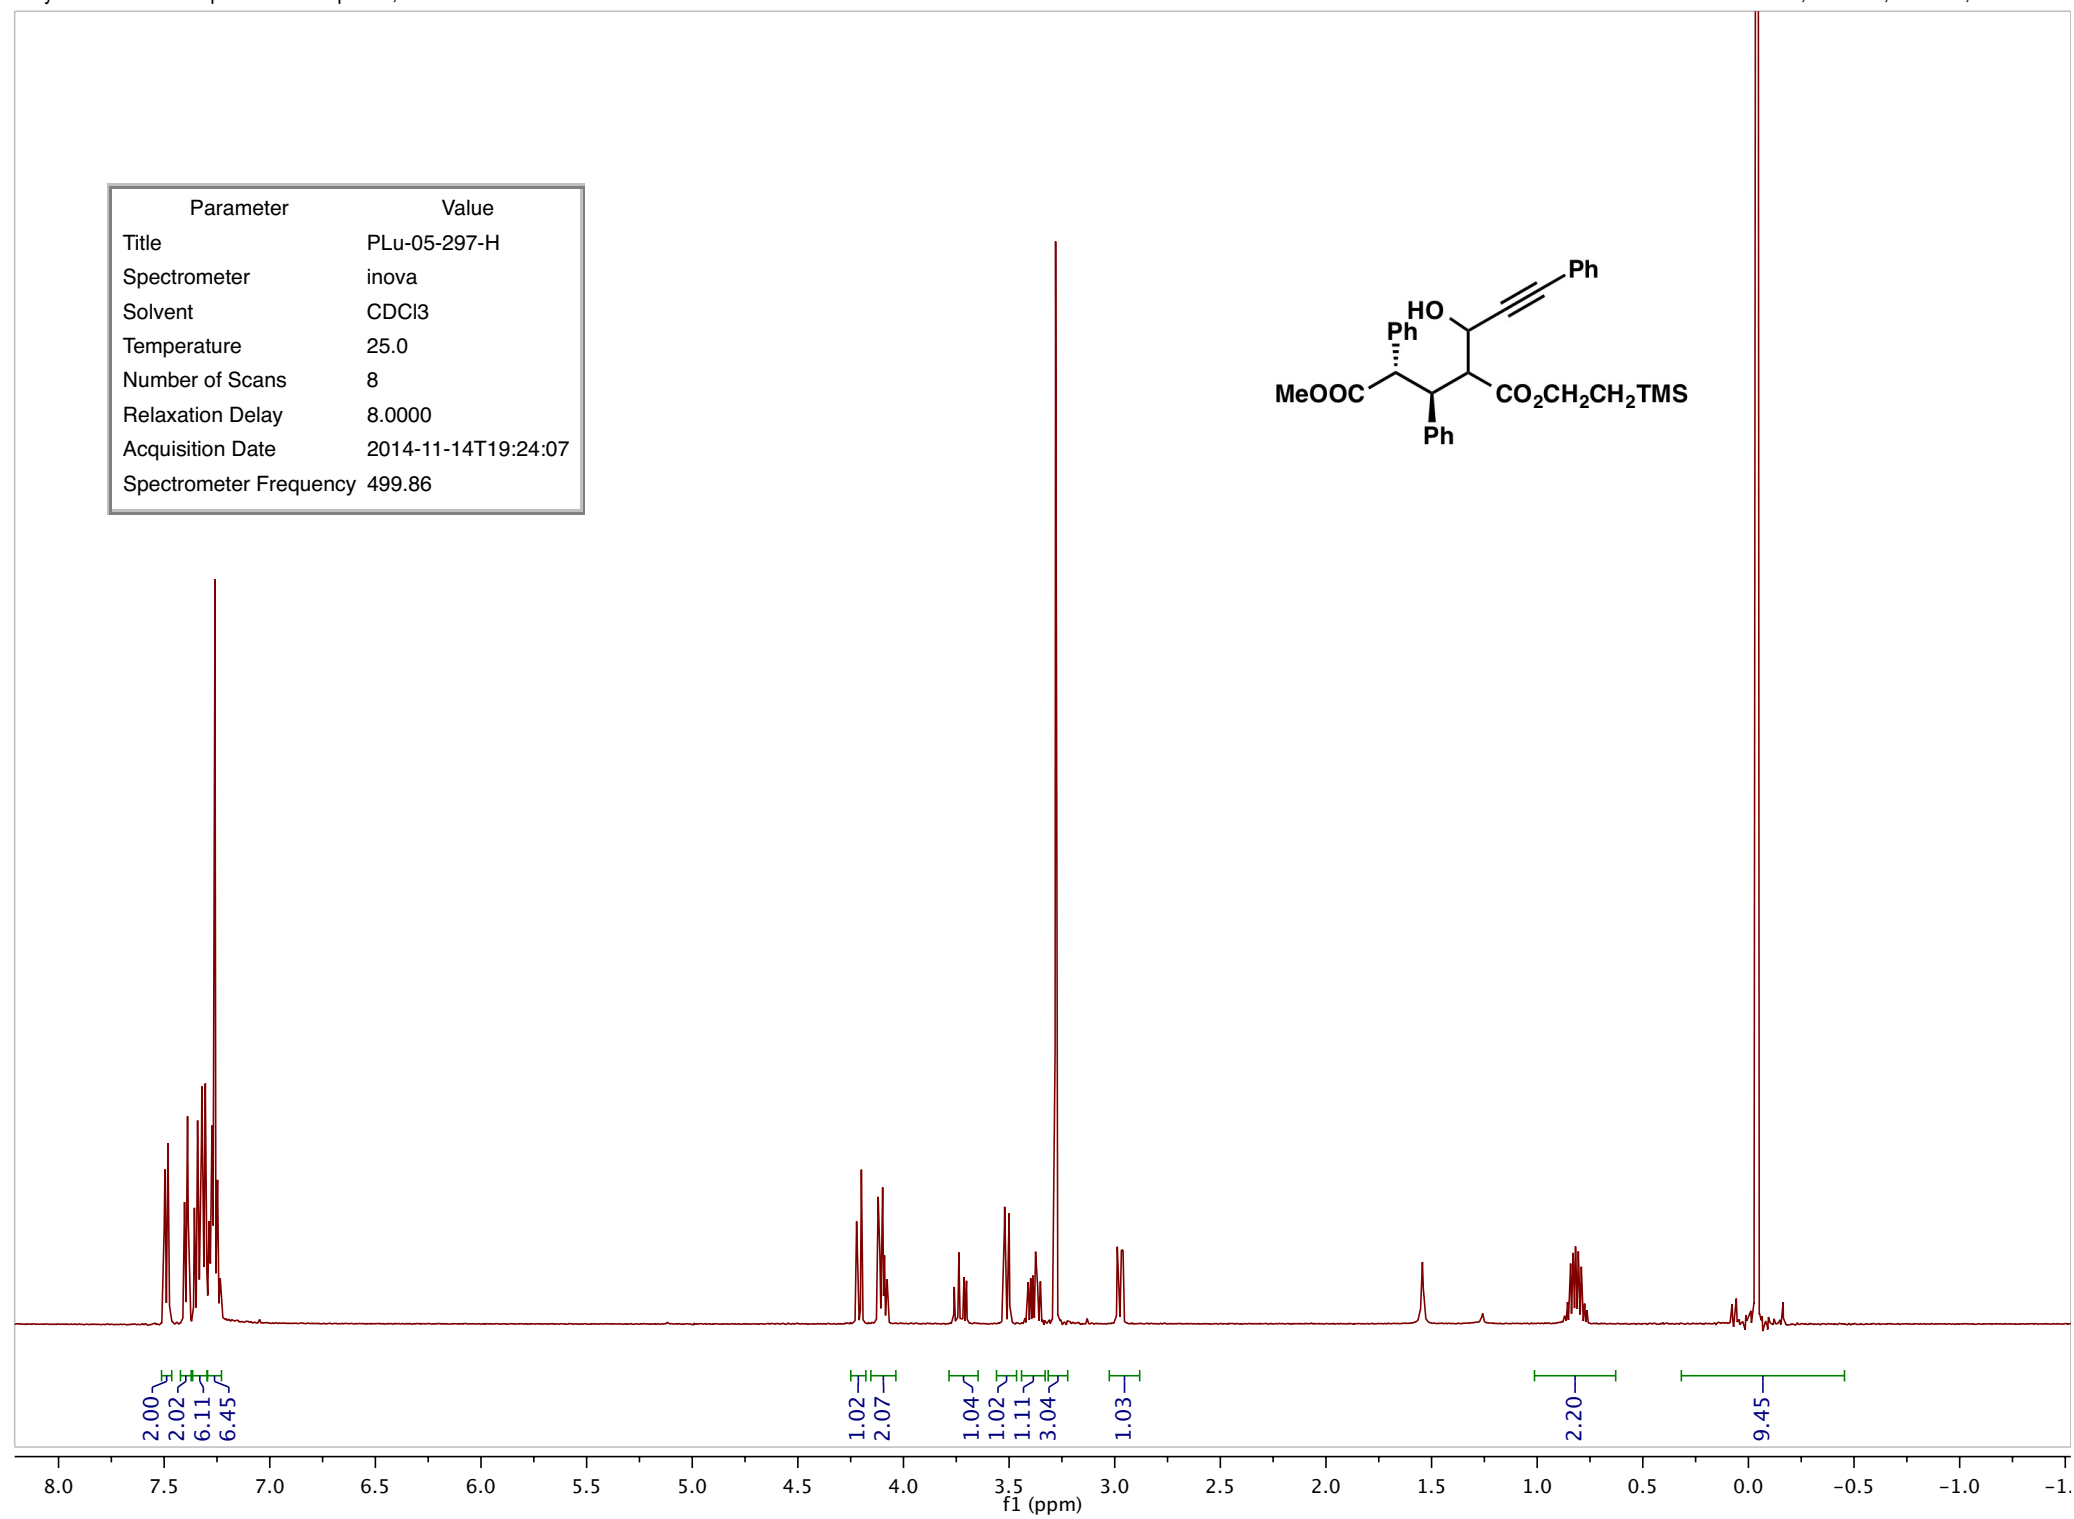

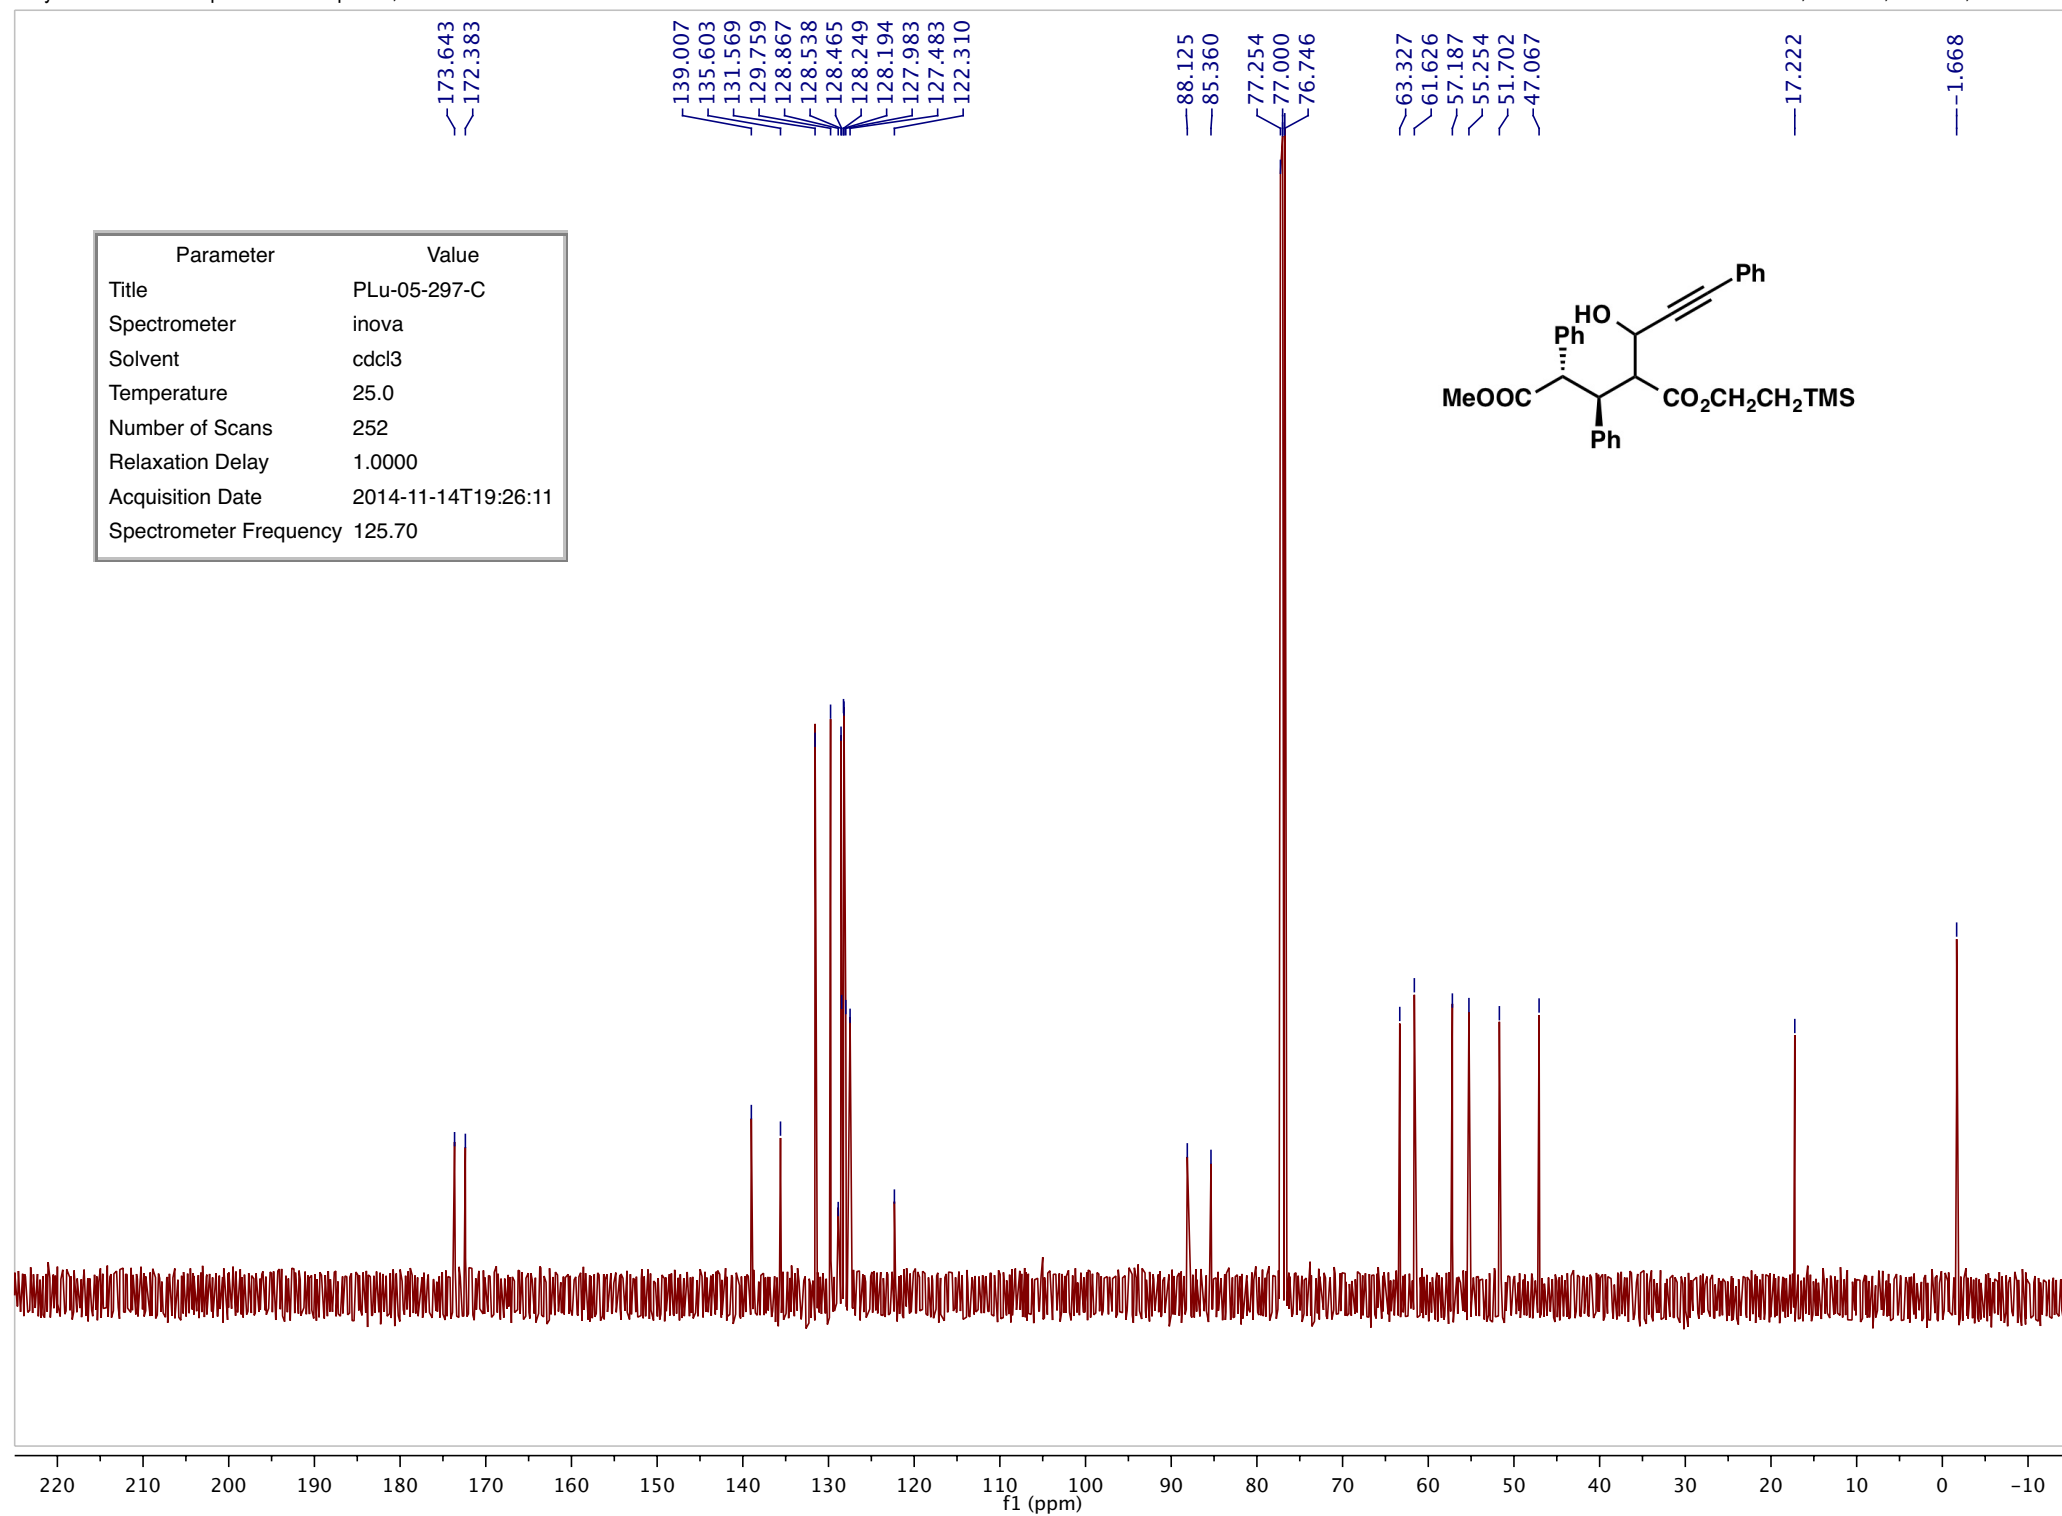

| Parameter              | Value               |
|------------------------|---------------------|
| Title                  | PLu-06-29-1HH       |
| Spectrometer           | inova               |
| Solvent                | CDCl <sub>3</sub>   |
| Temperature            | 25.0                |
| Number of Scans        | 8                   |
| Relaxation Delay       | 8.0000              |
| Acquisition Date       | 2014-11-15T09:27:25 |
| Spectrometer Frequency | 499.86              |

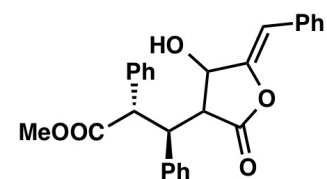**major isomer**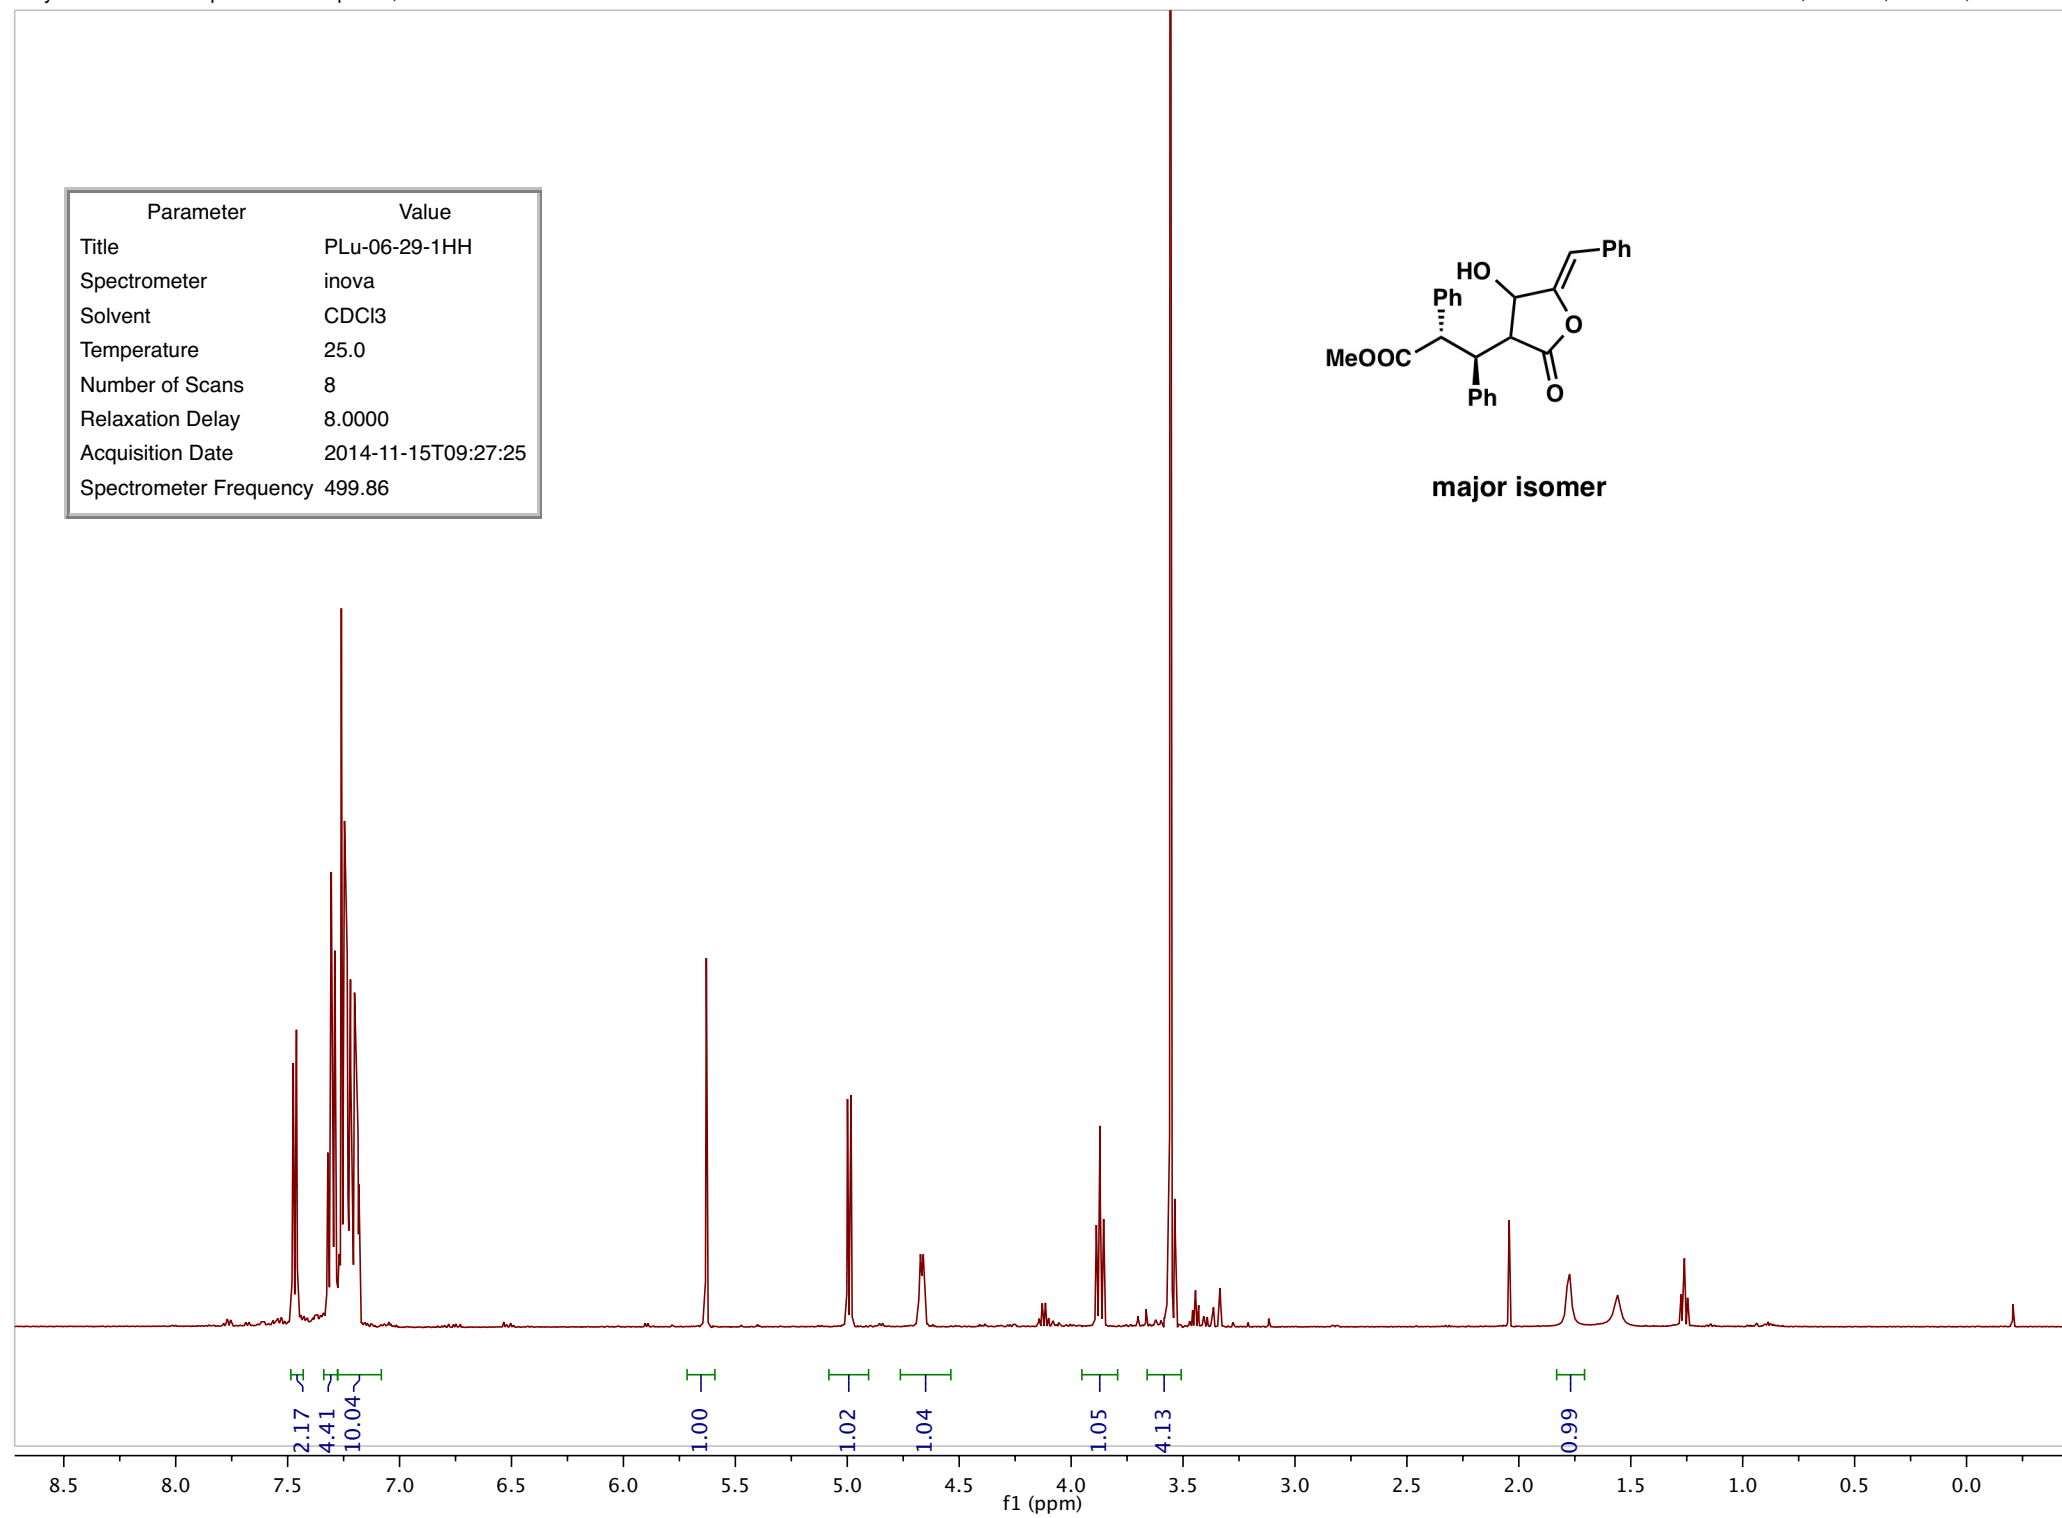

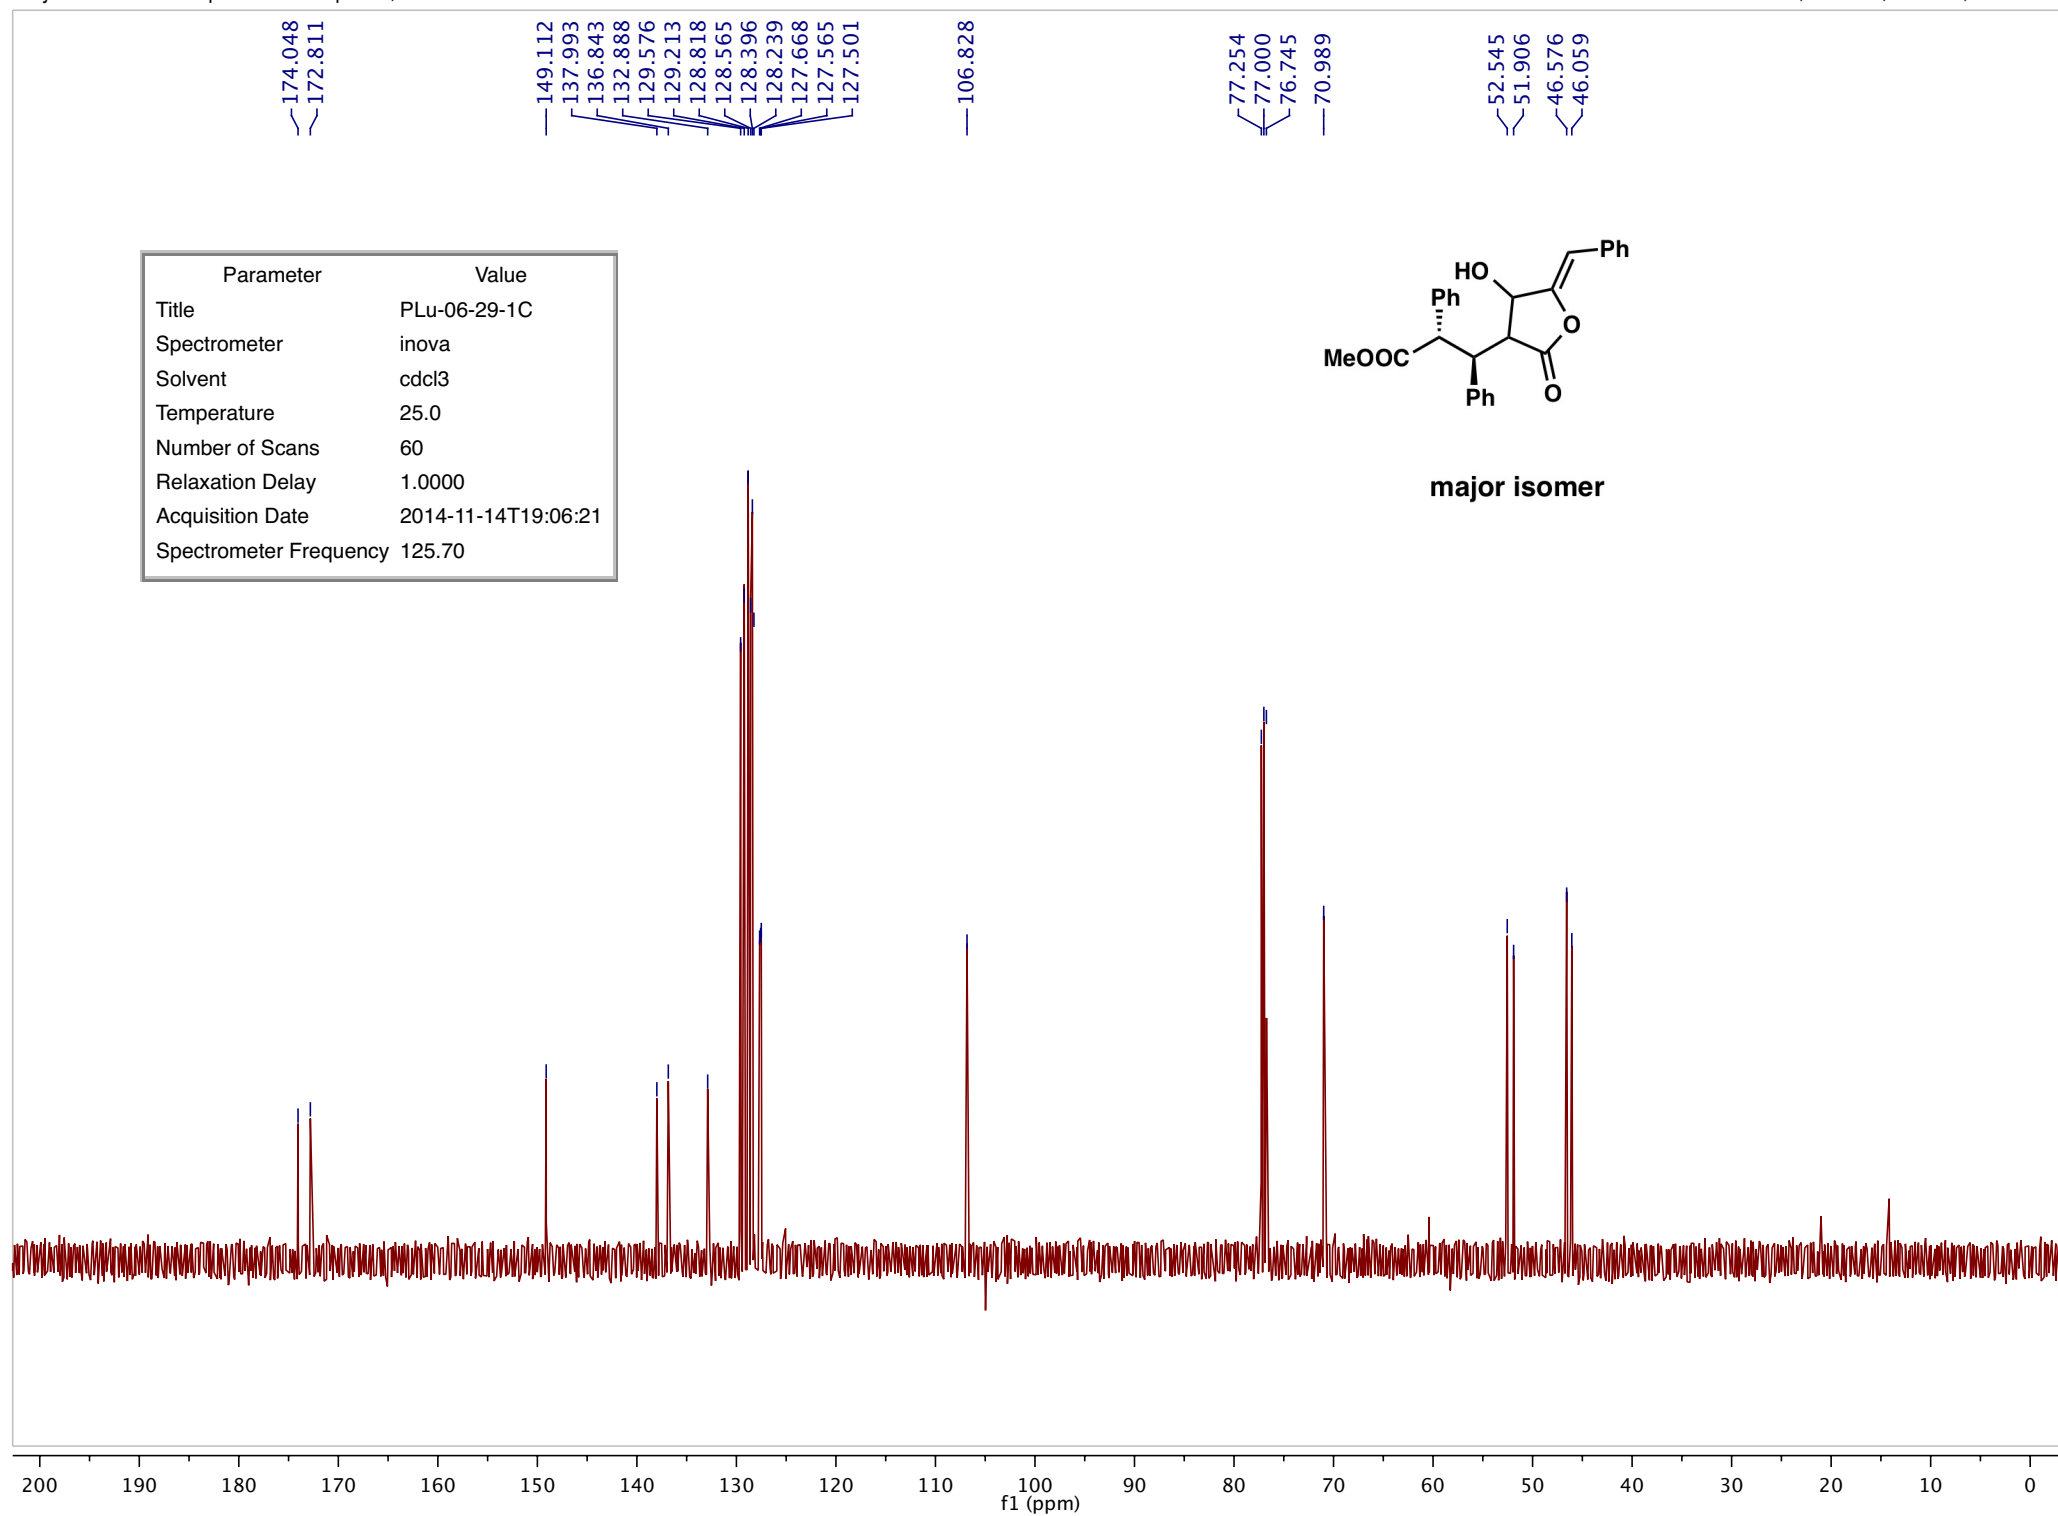

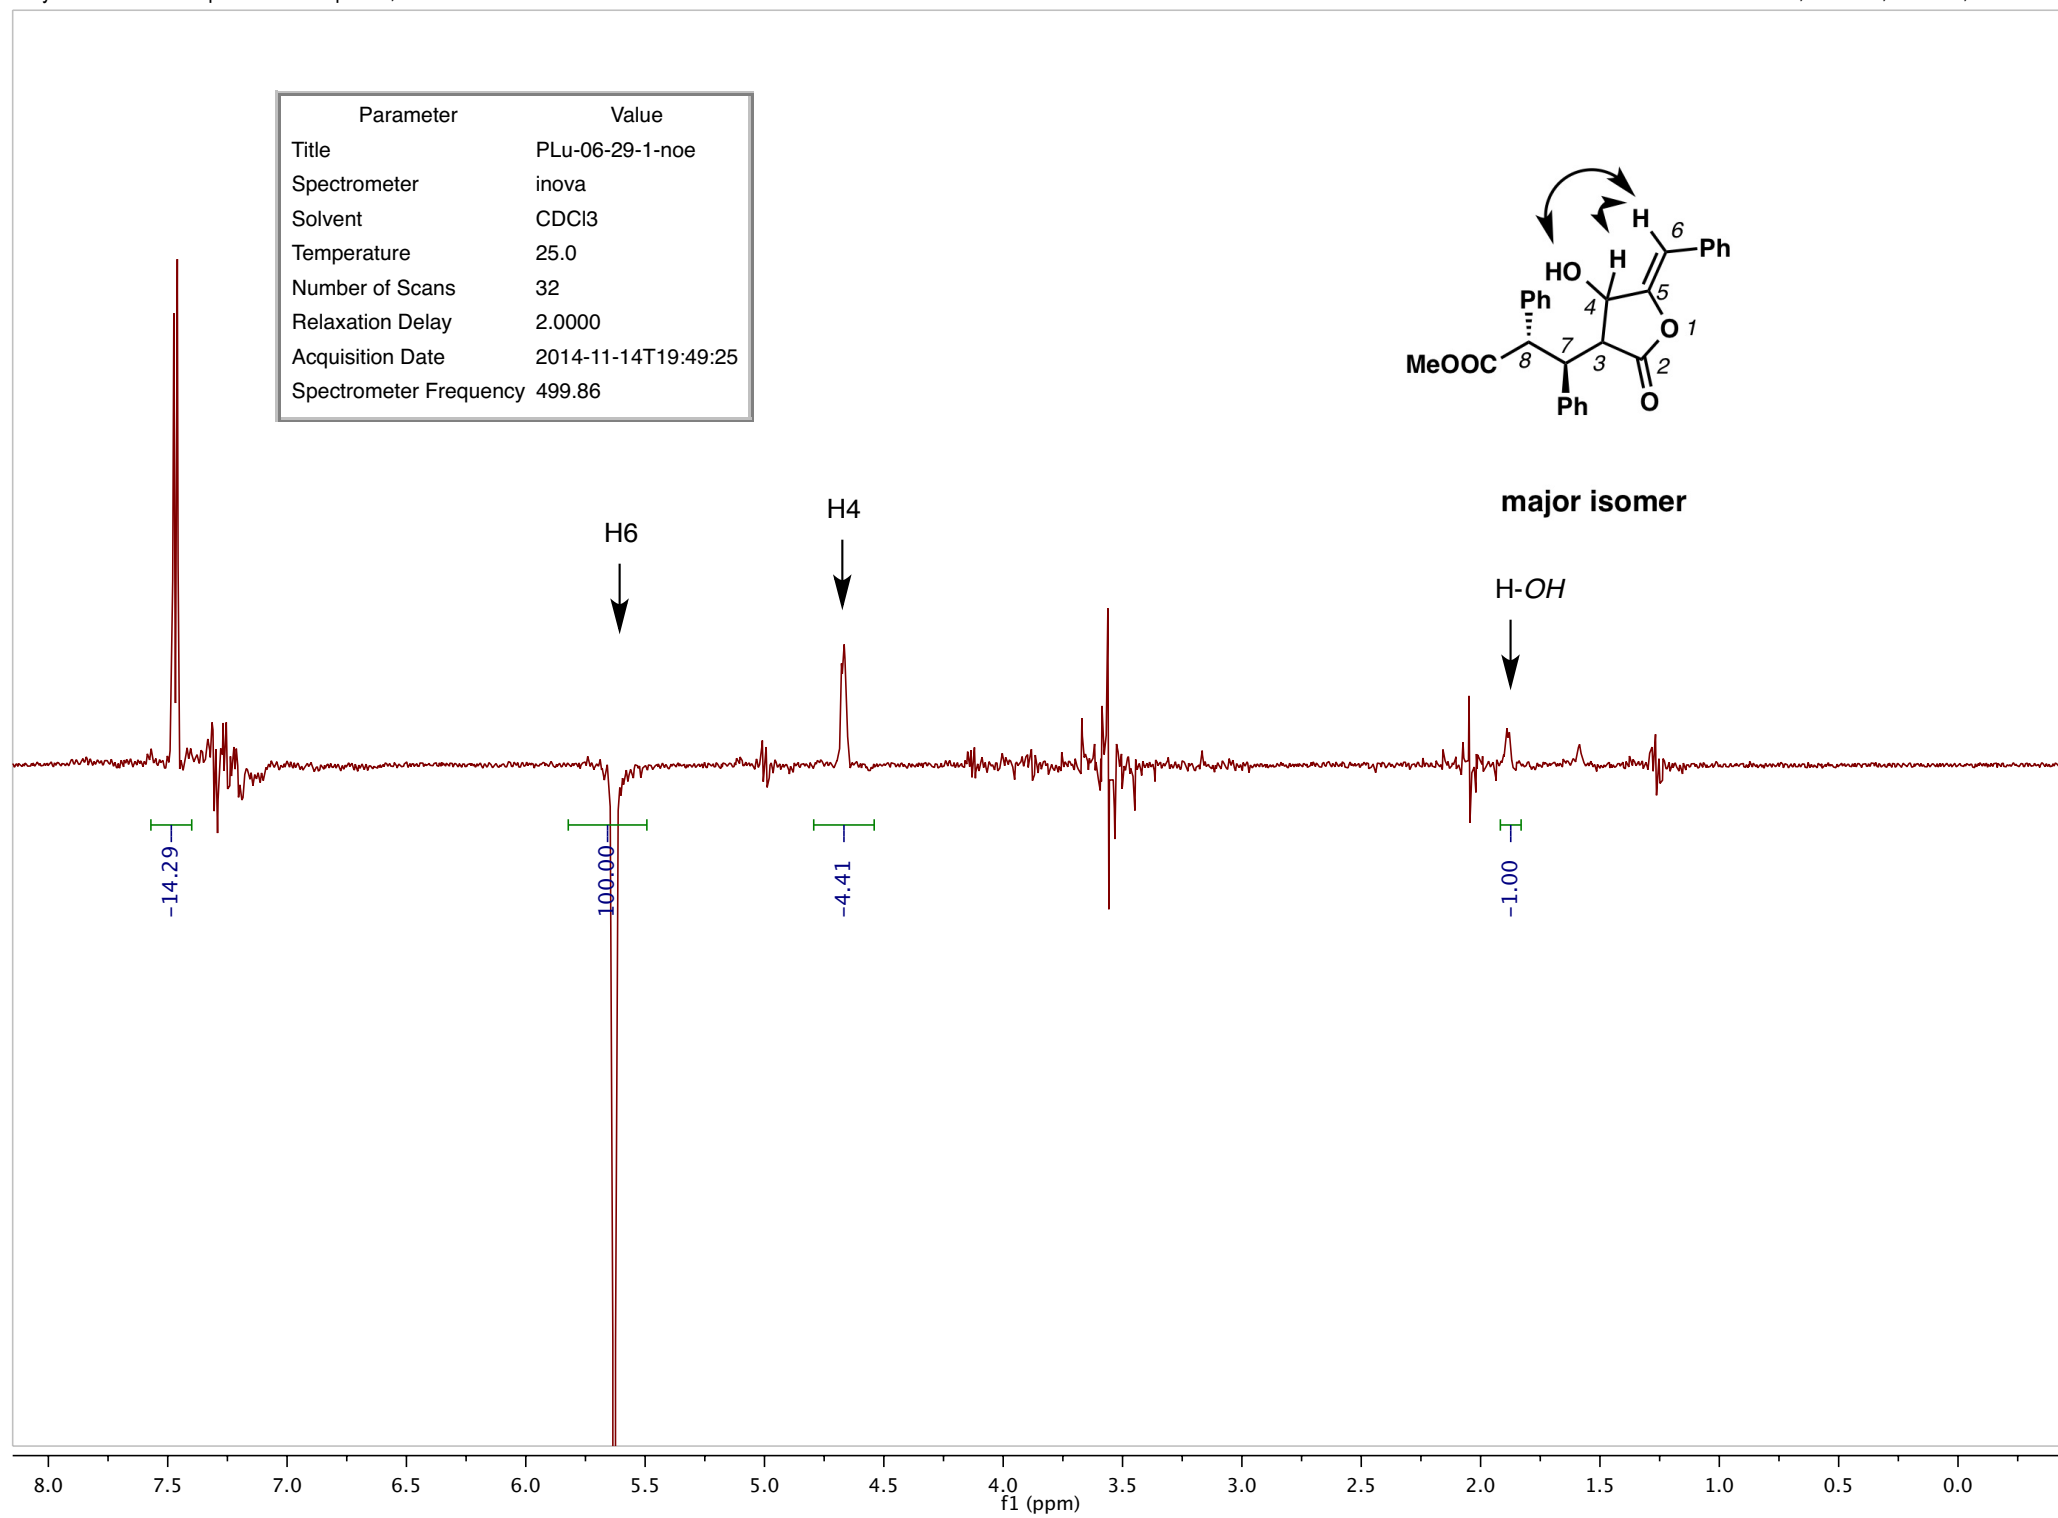



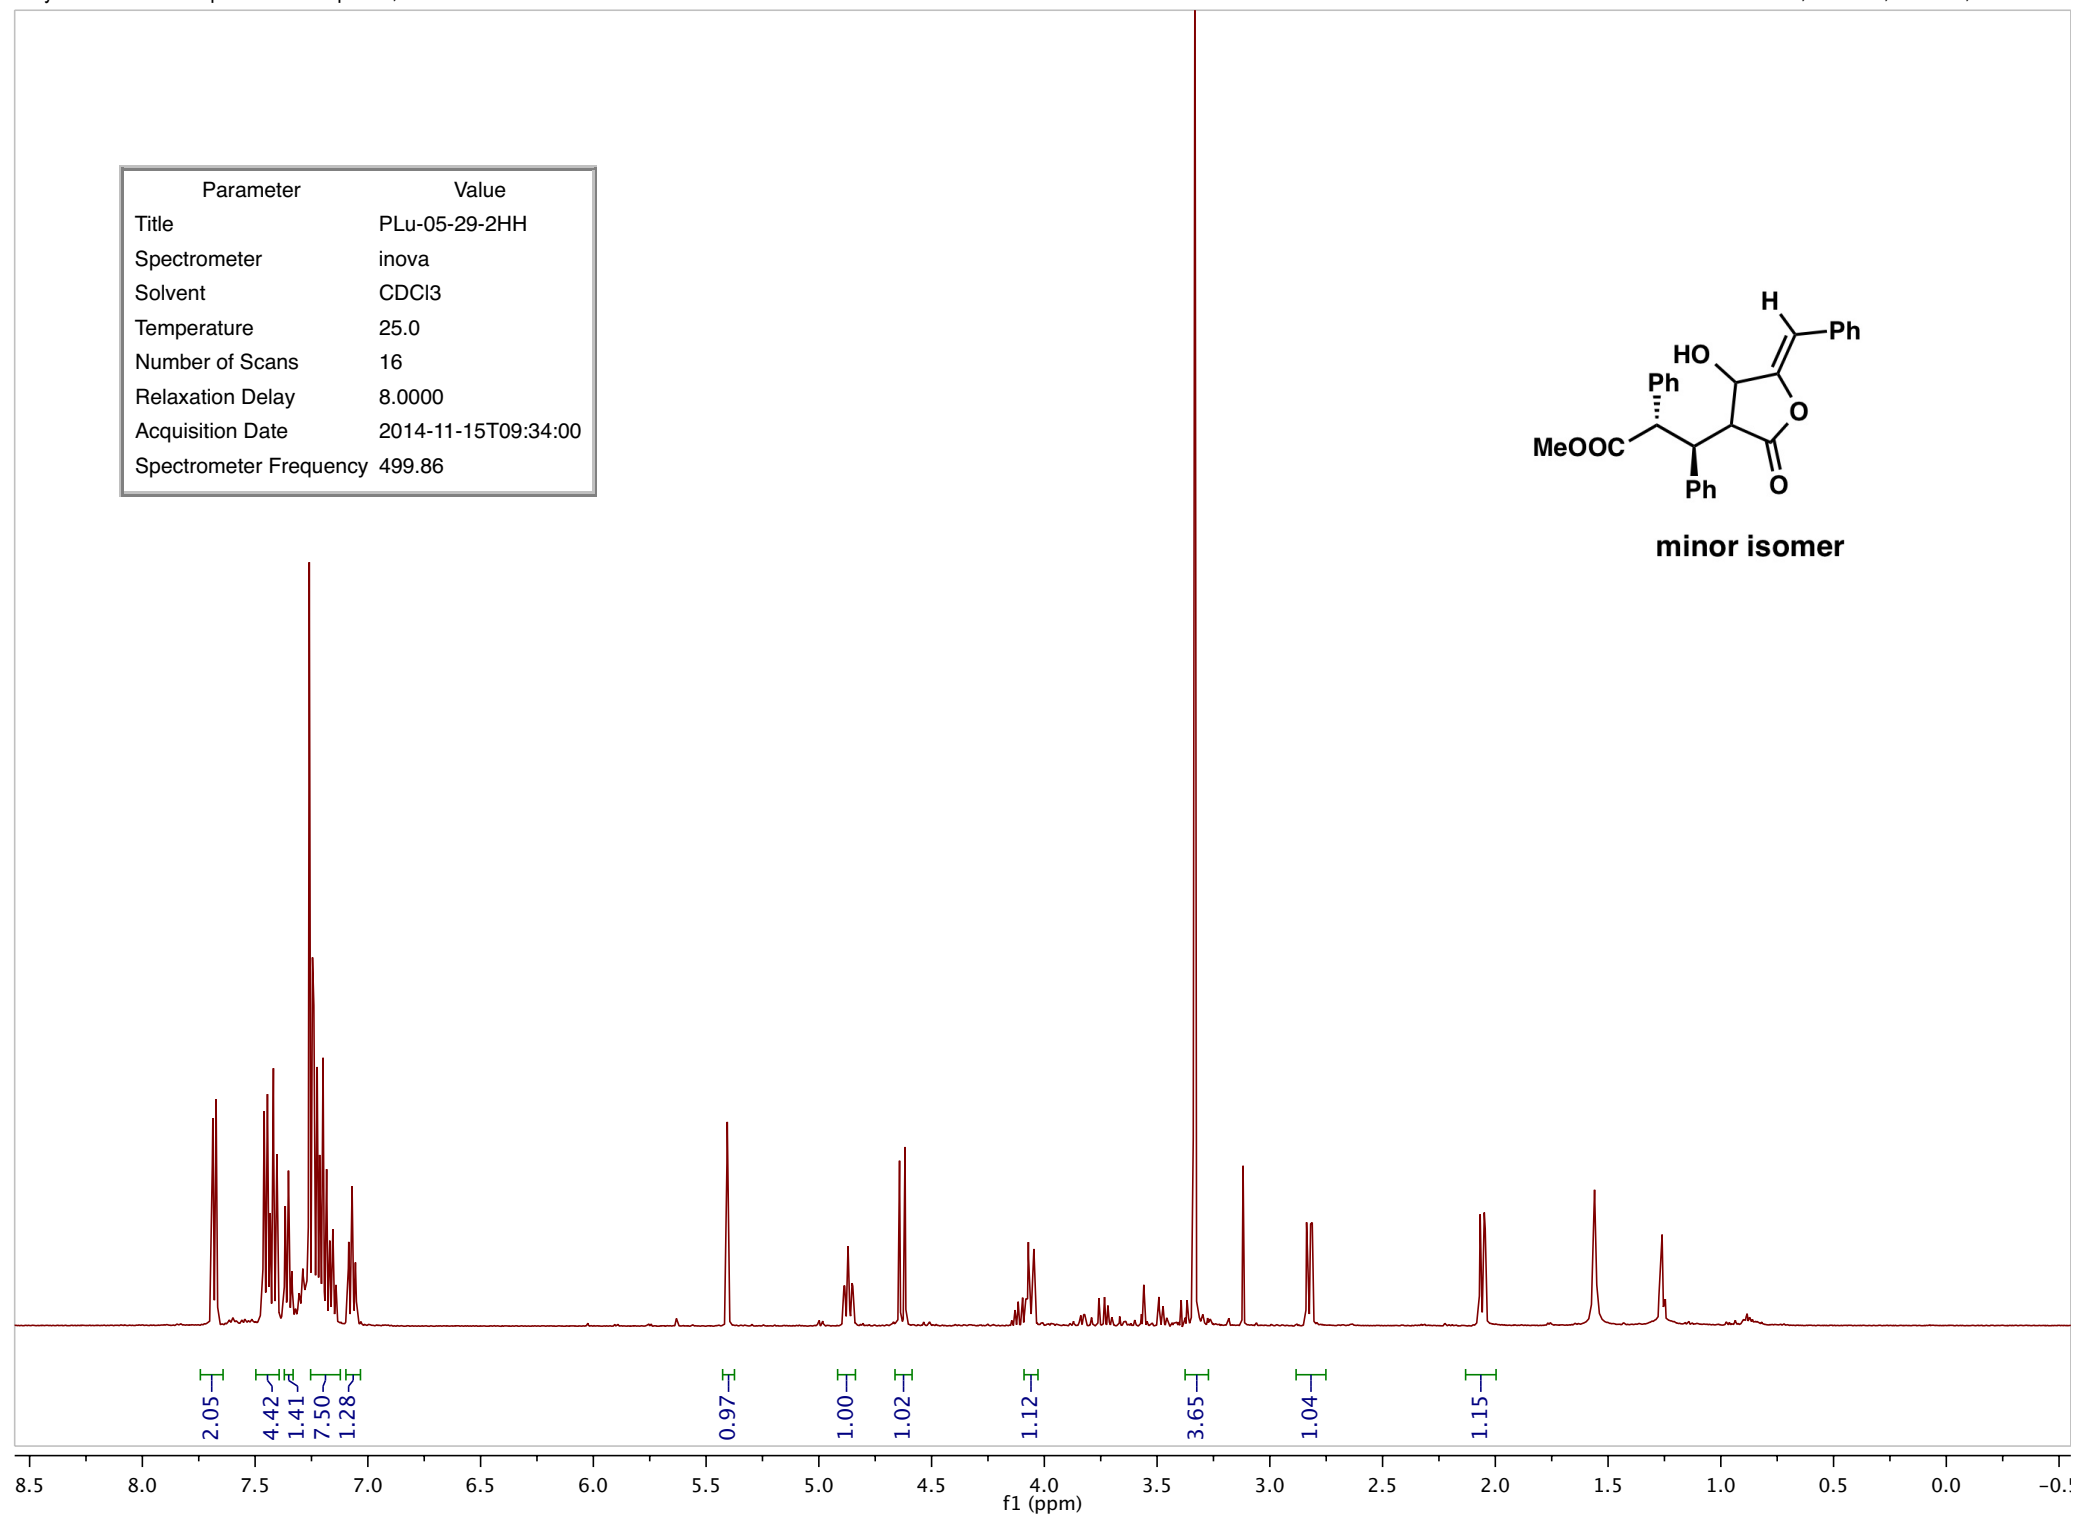

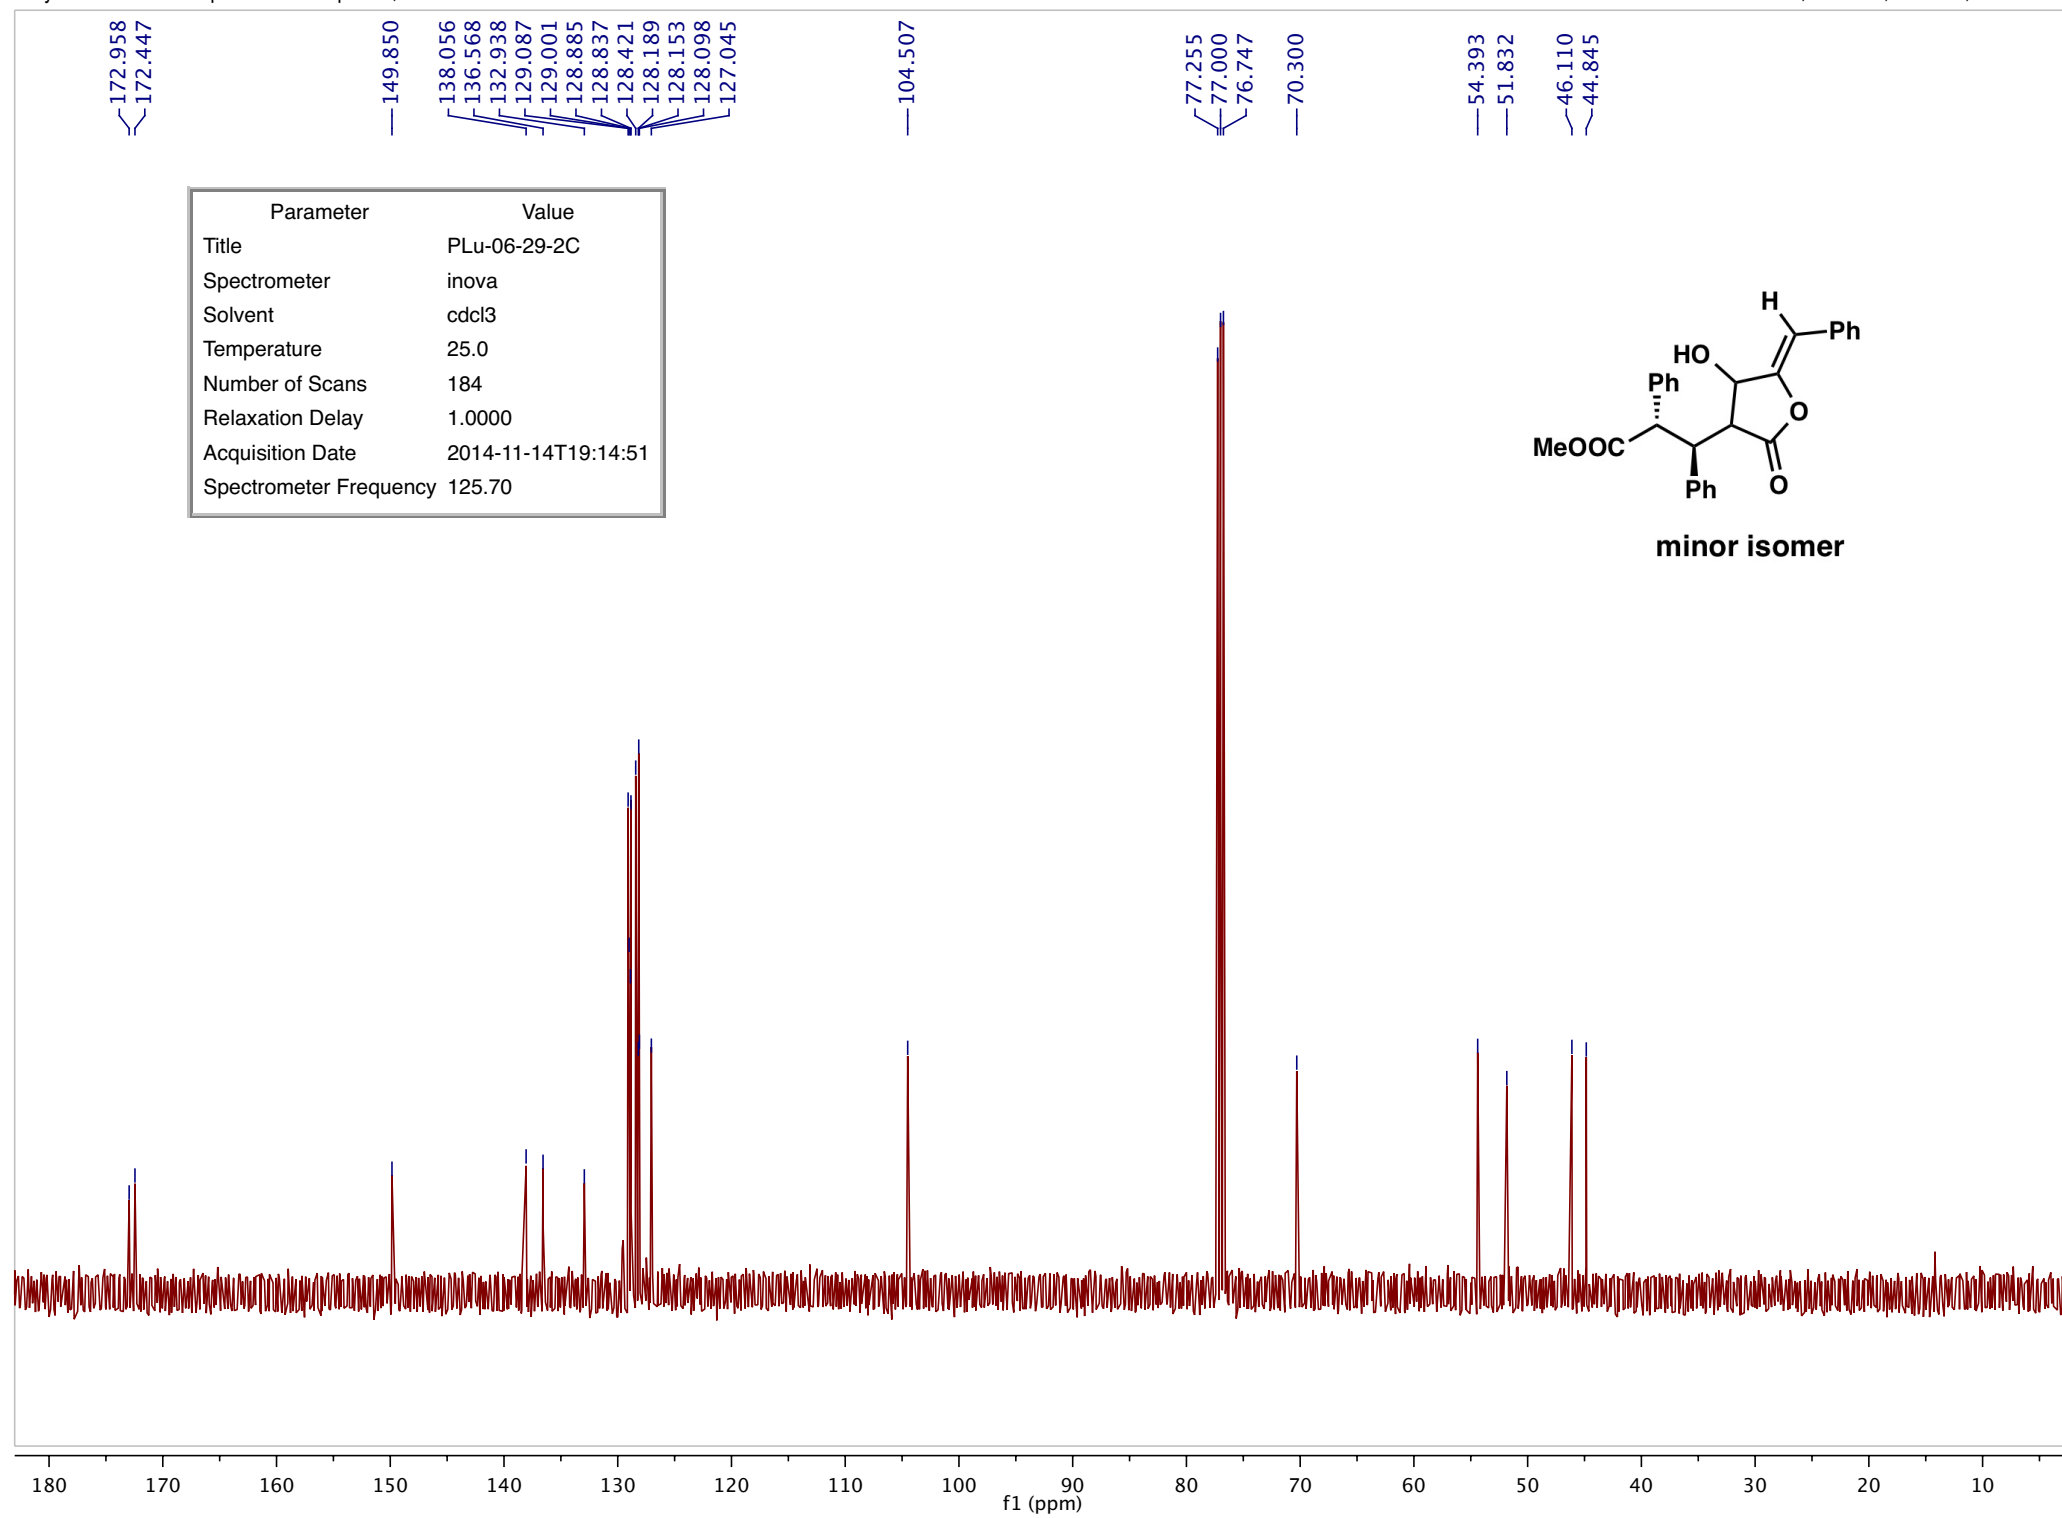

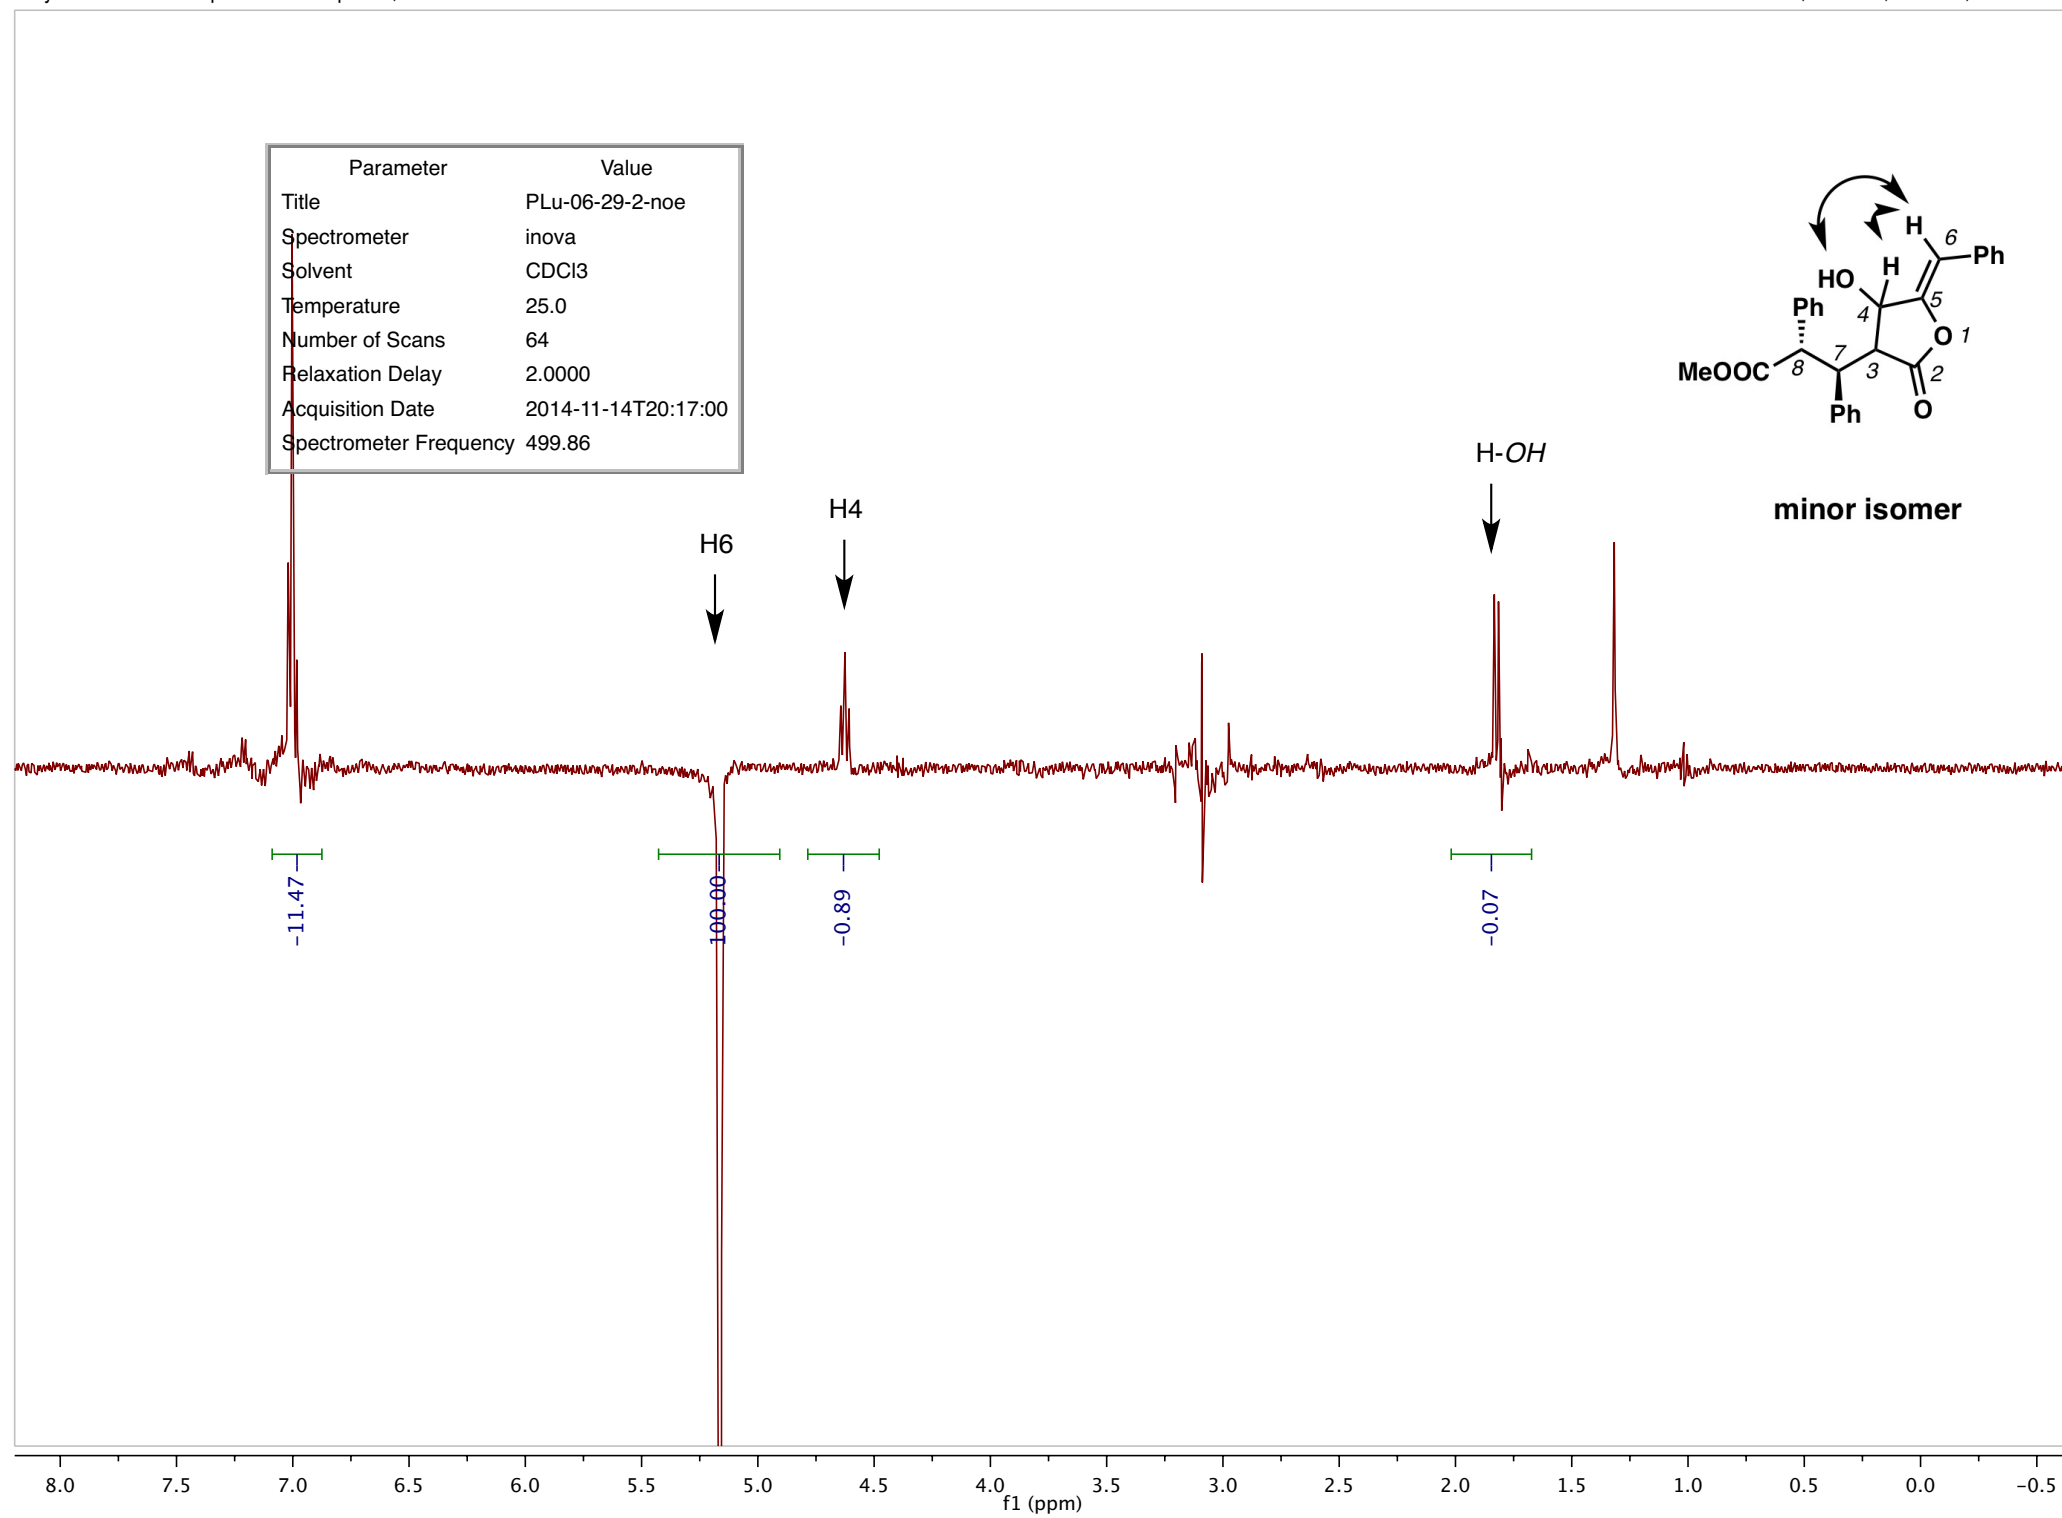

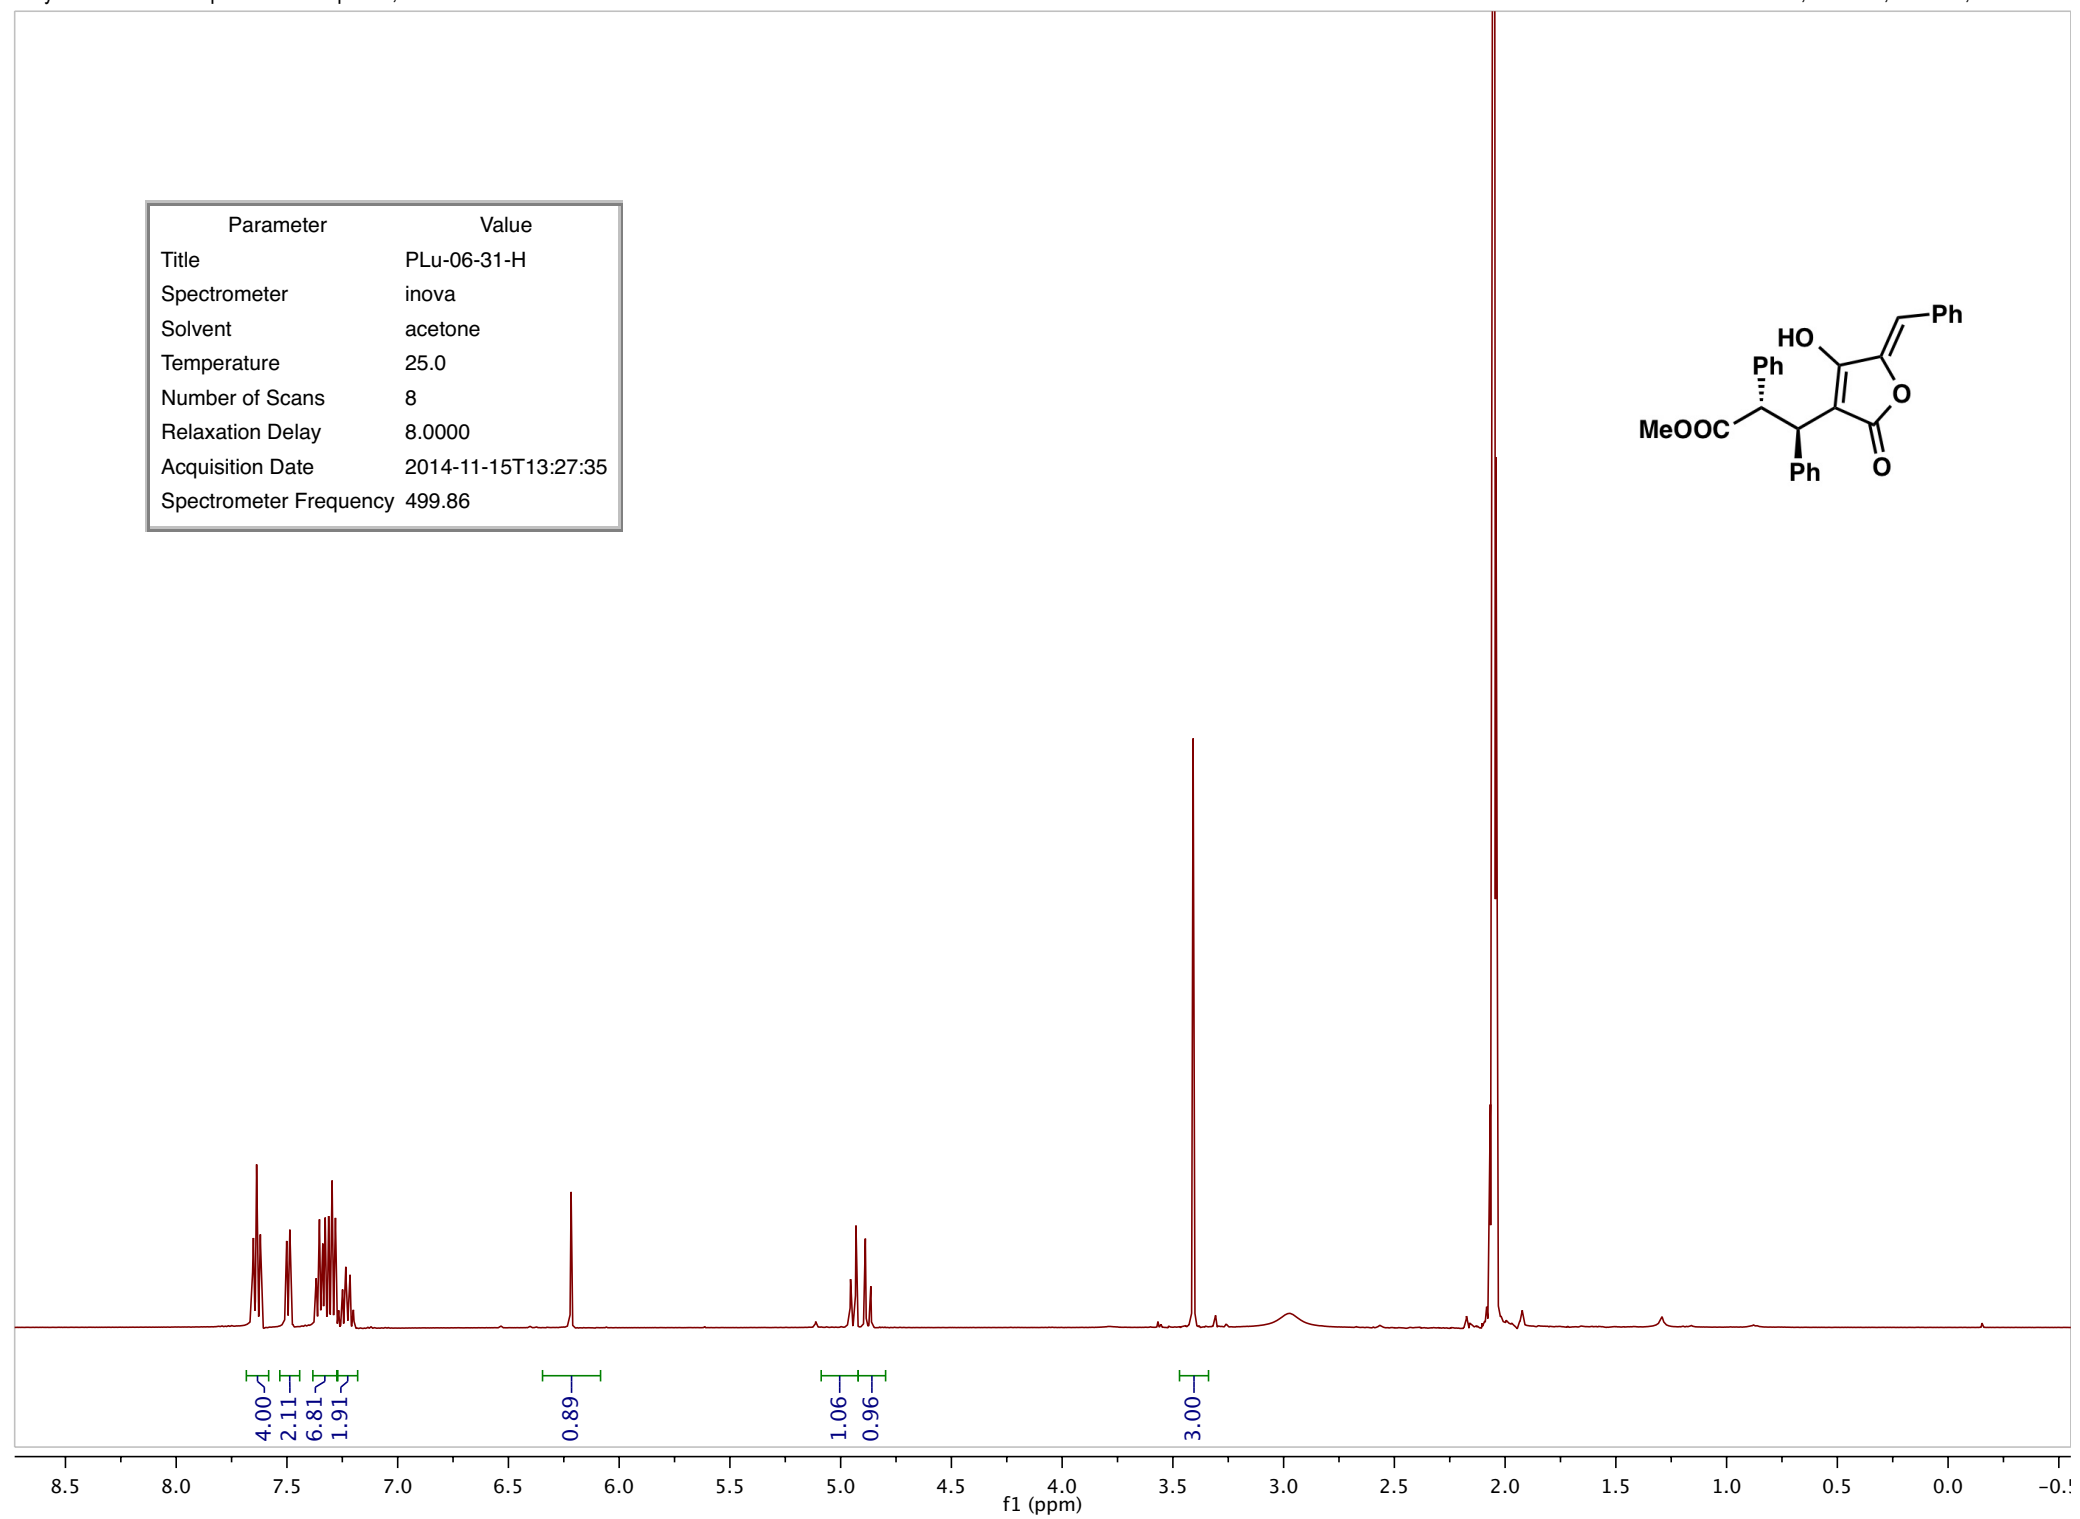

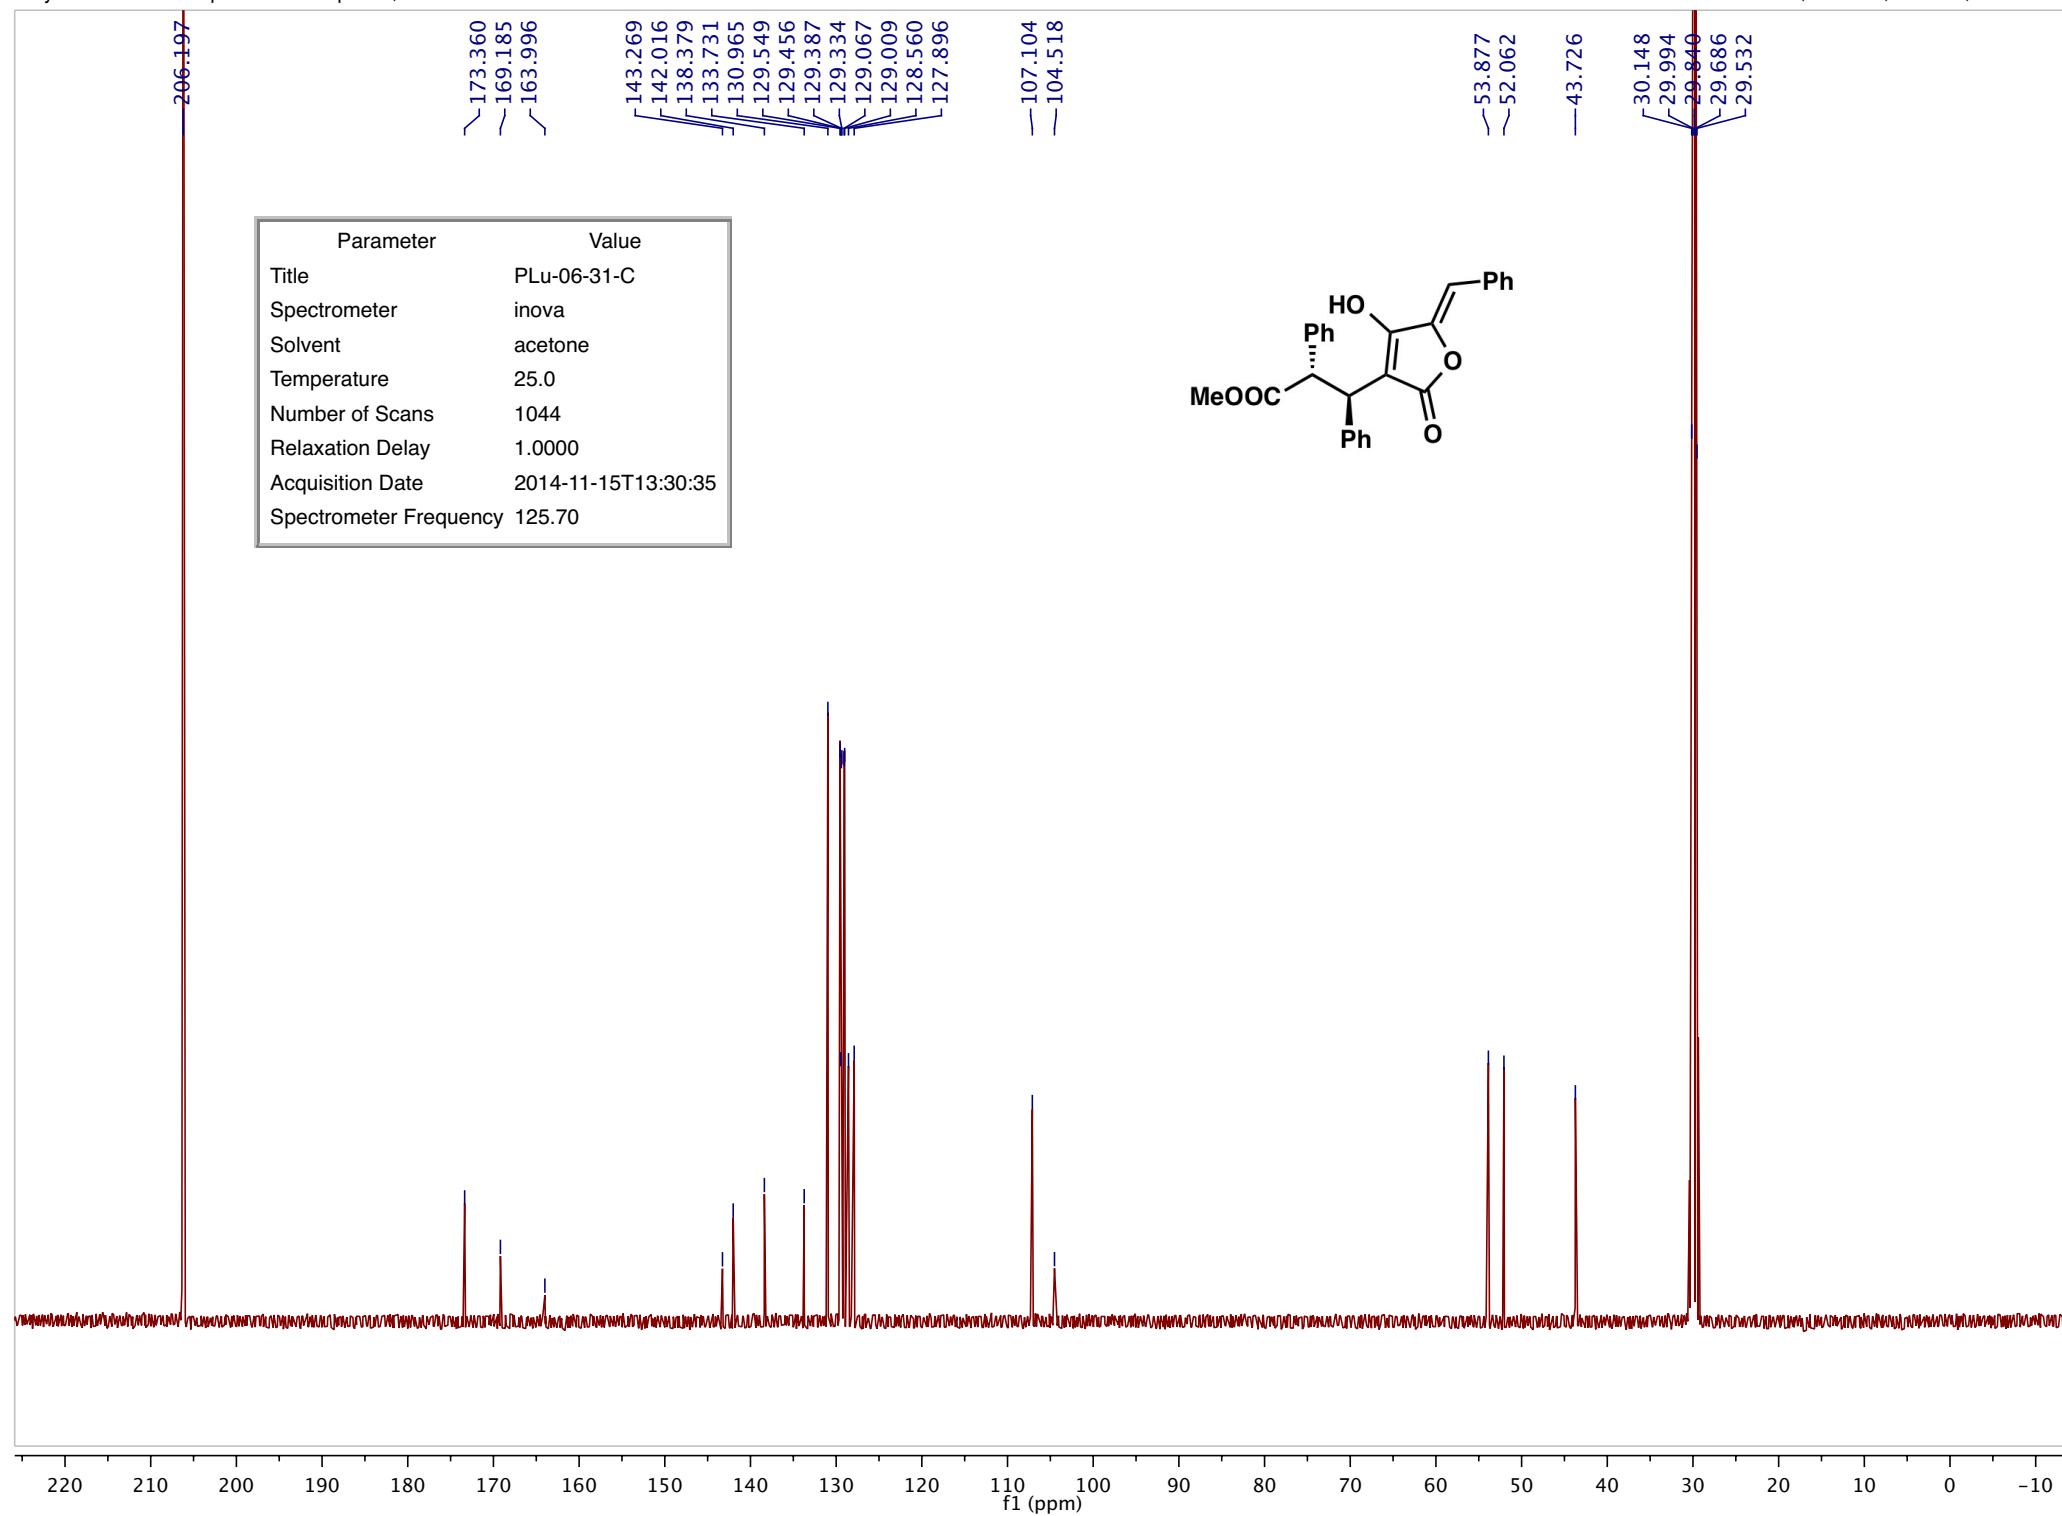

600 MHz  $^1\text{H}$ NMR spectra in  $d_6$ -acetone of natural Pulveraven B  
(Ross, S. A. et al, *J. Nat. Prod.* 2003)

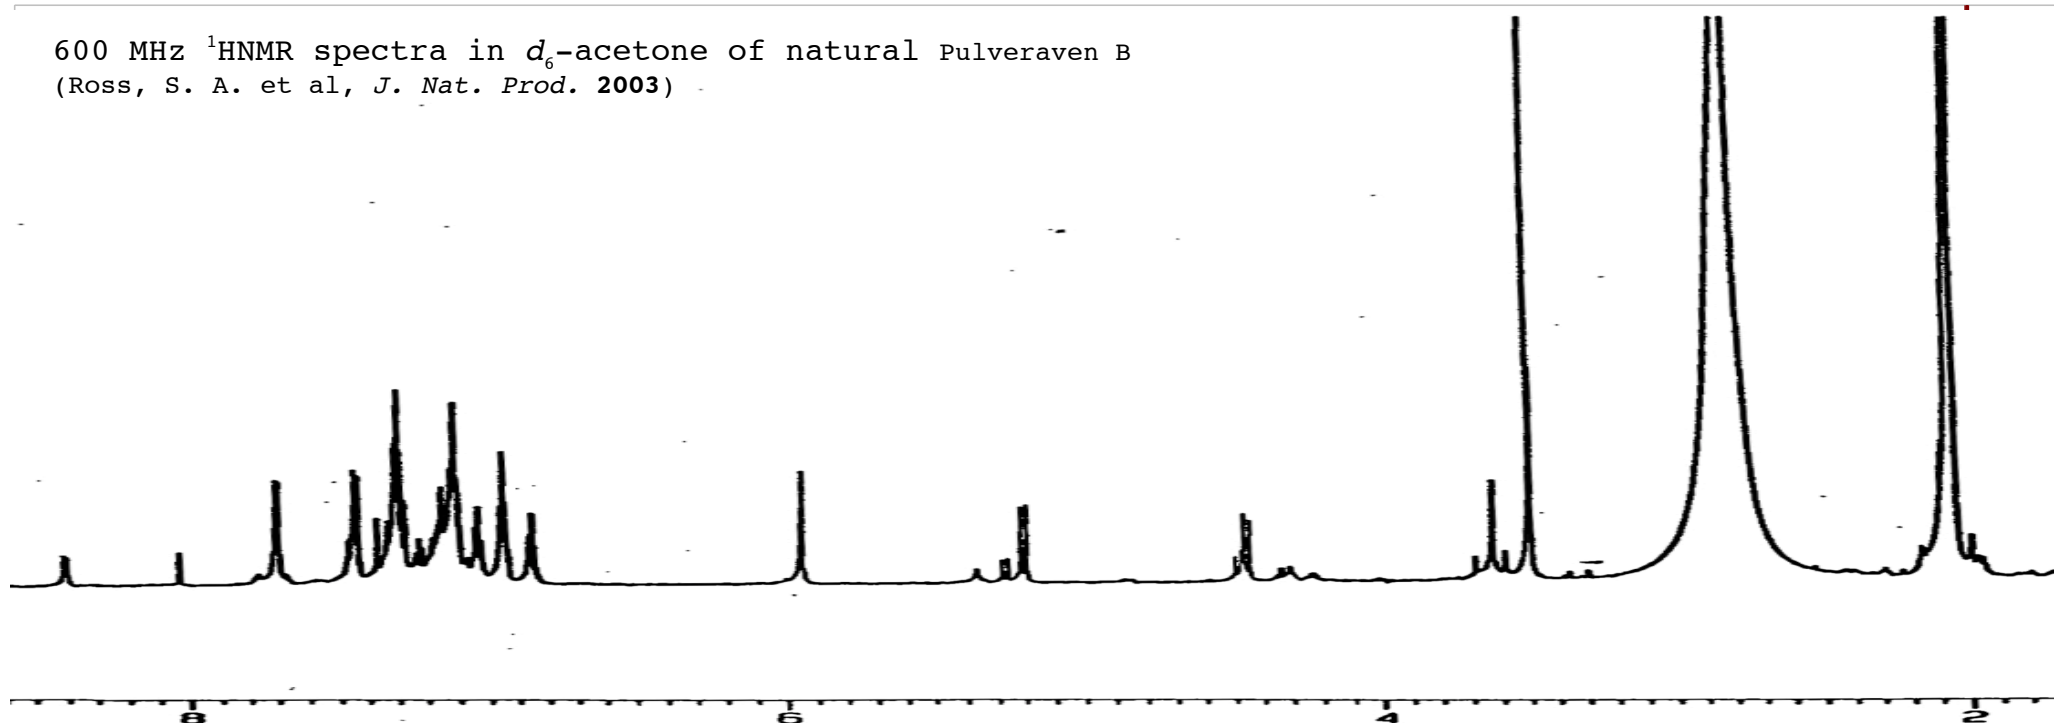

500 MHz  $^1\text{H}$ NMR spectra in  $d_6$ -acetone of synthetic proposed structure 9.

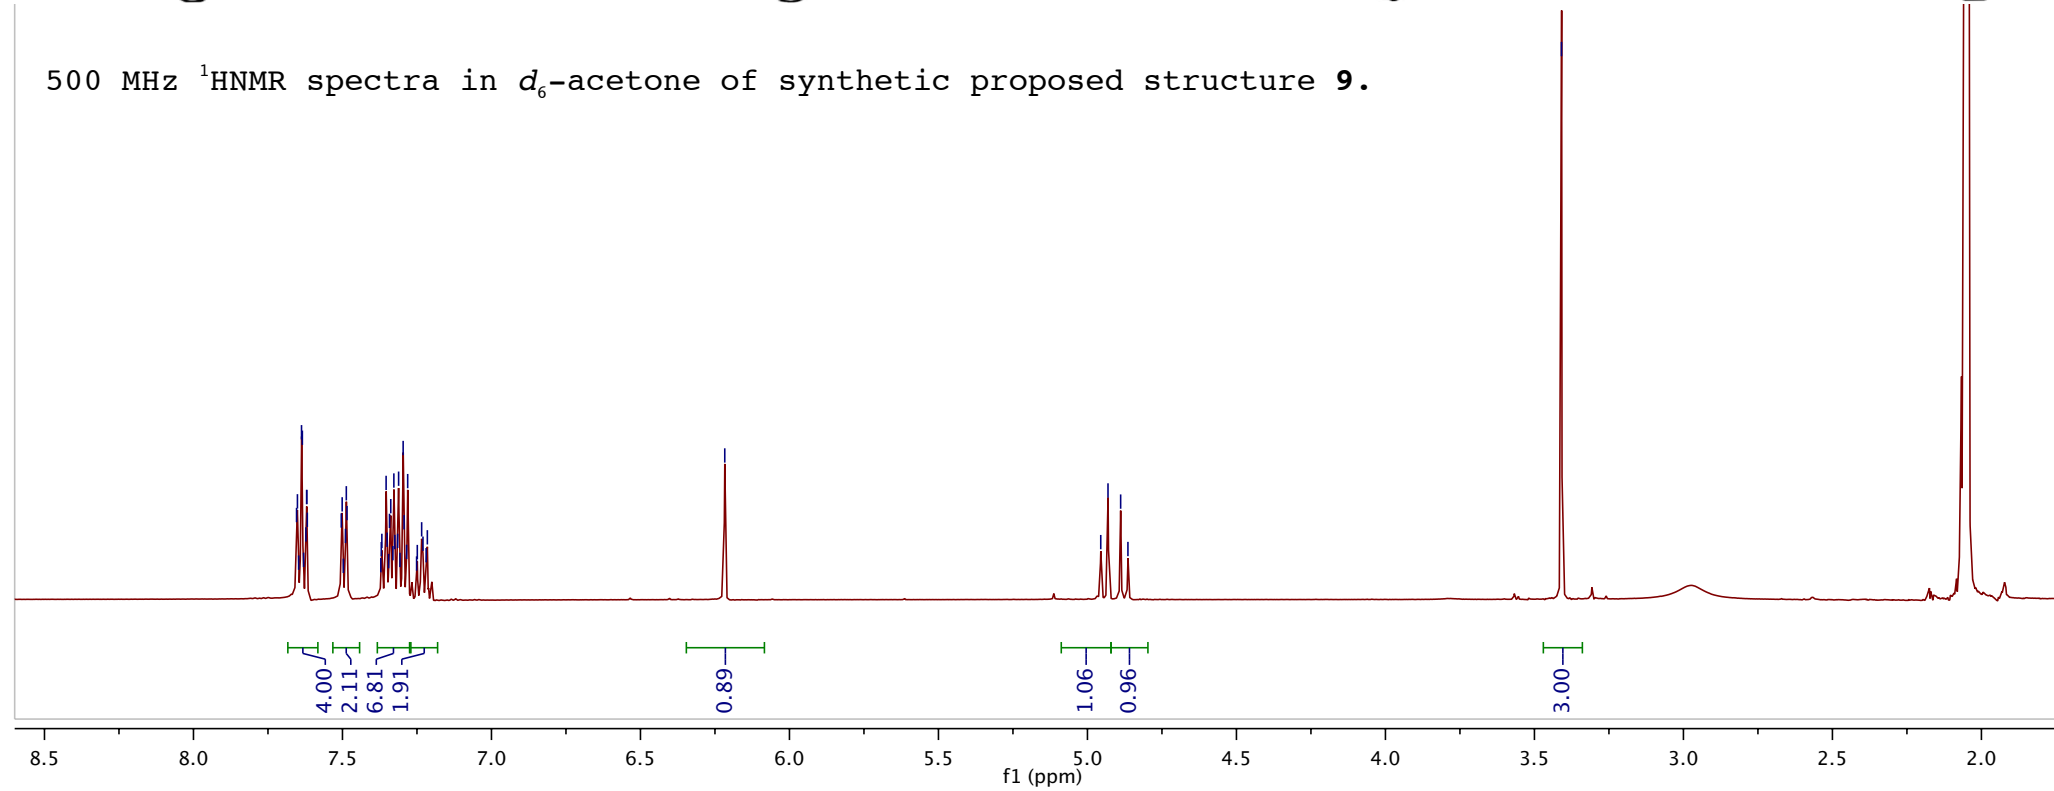

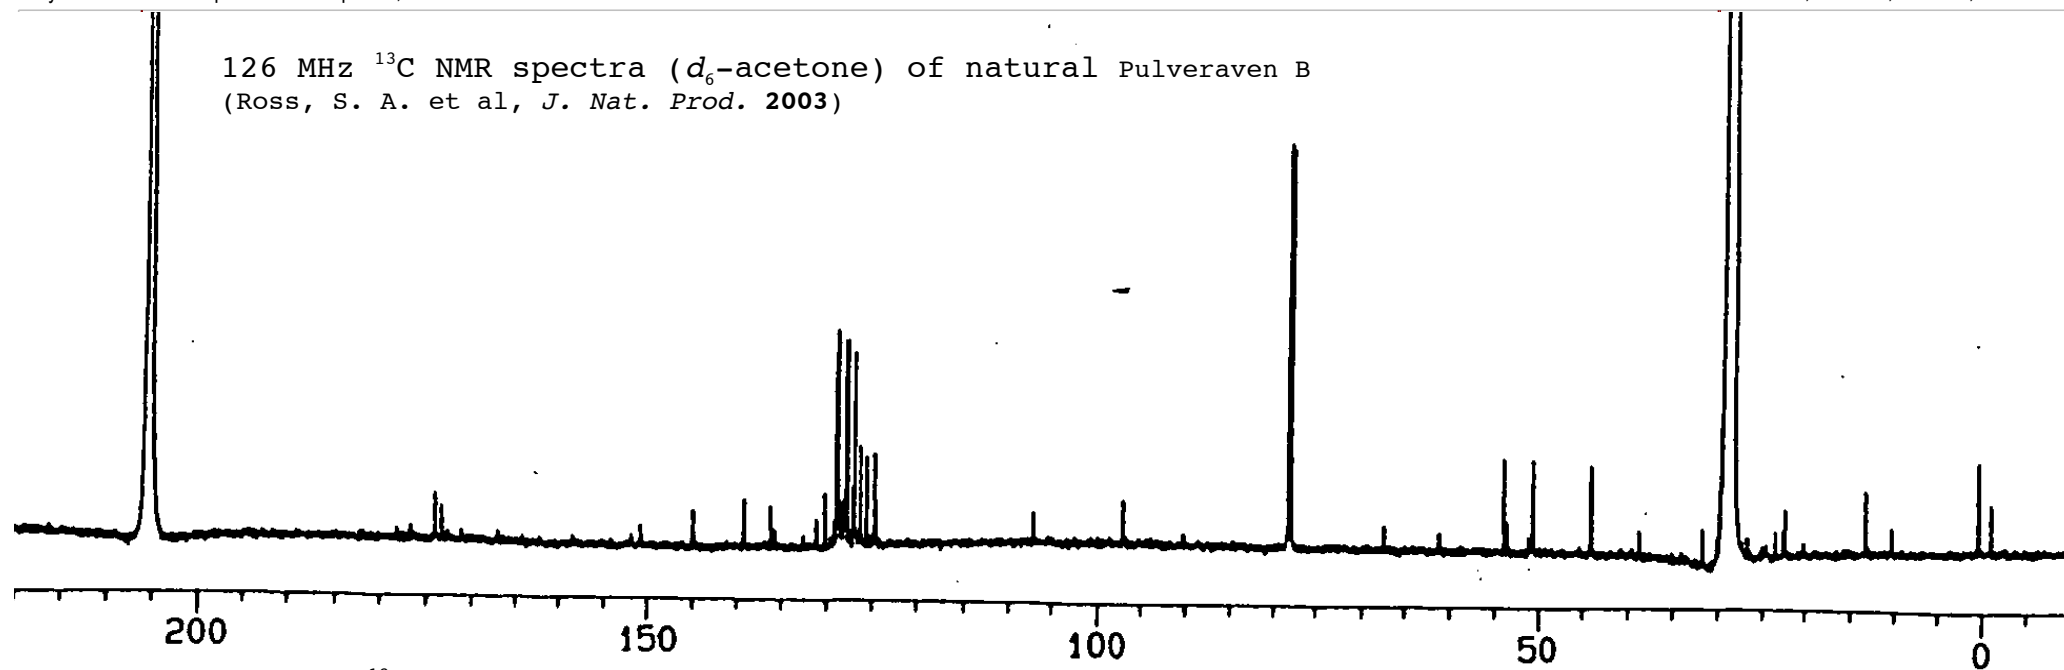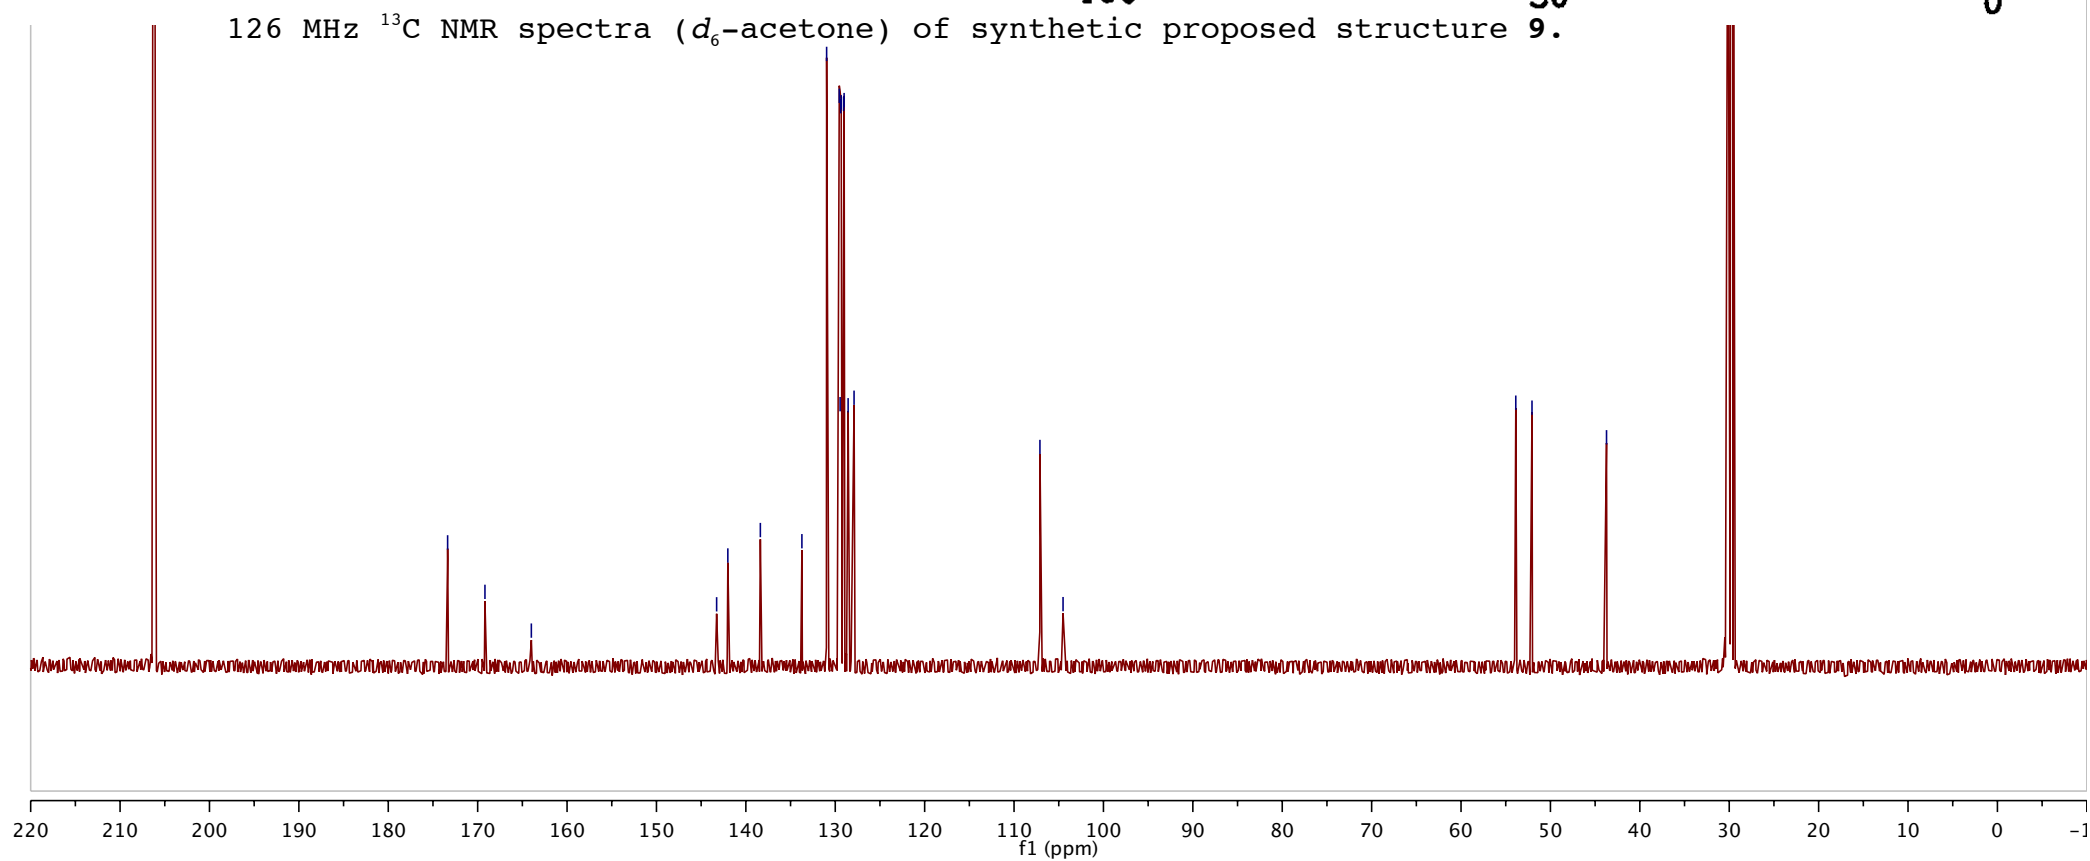

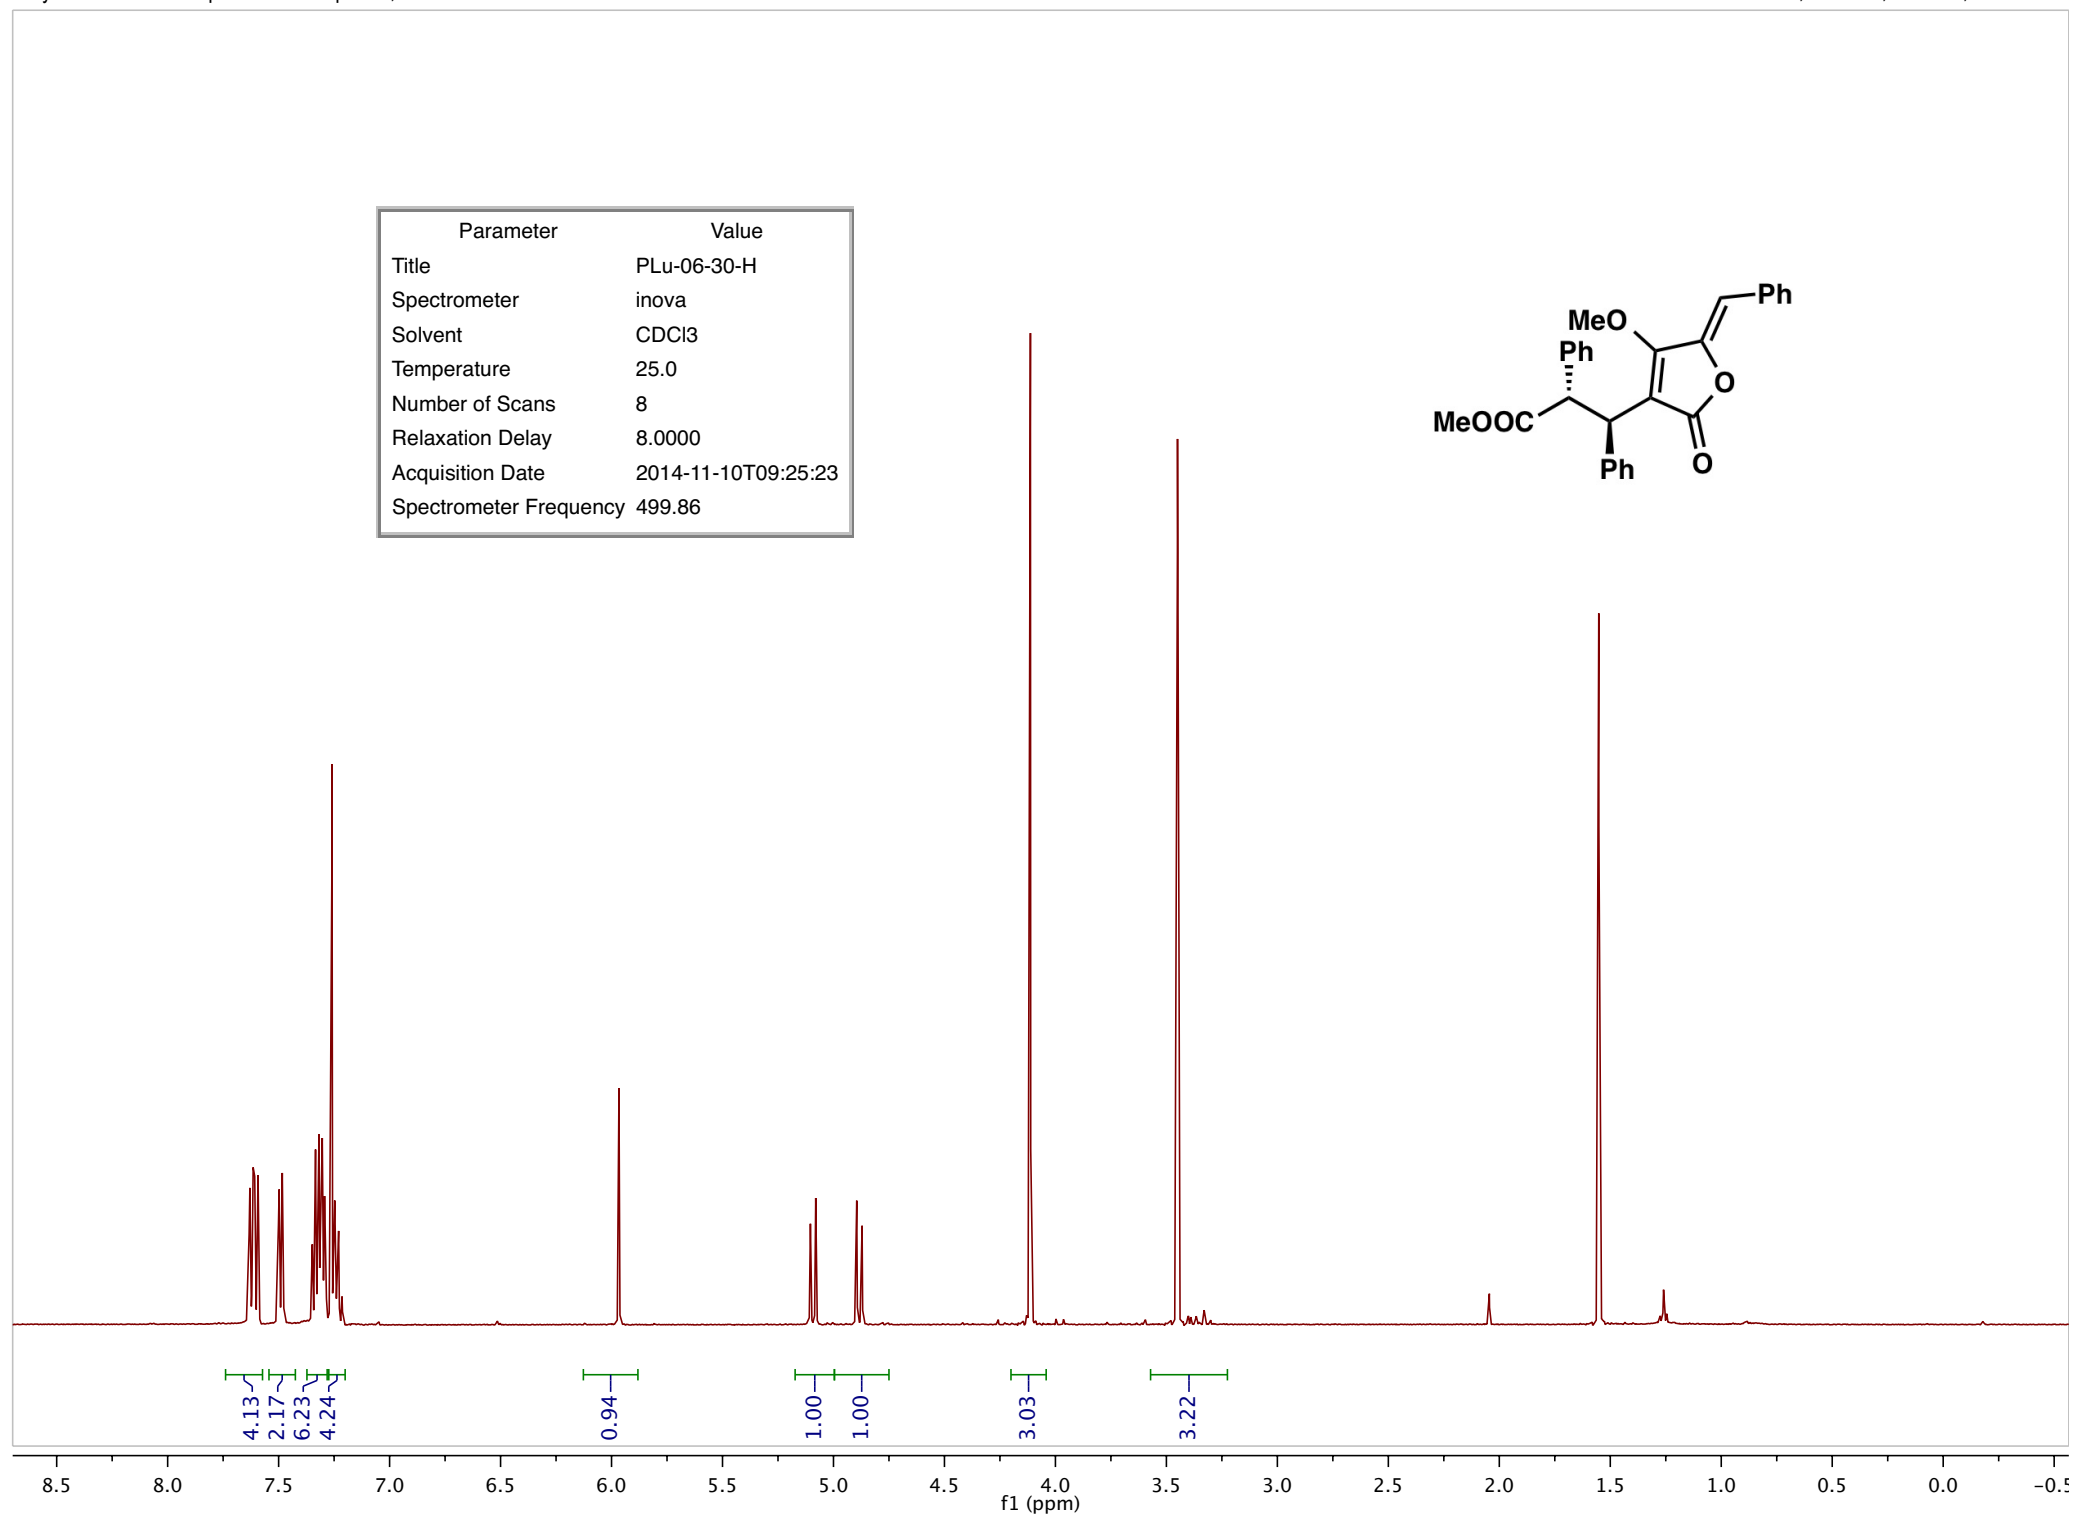



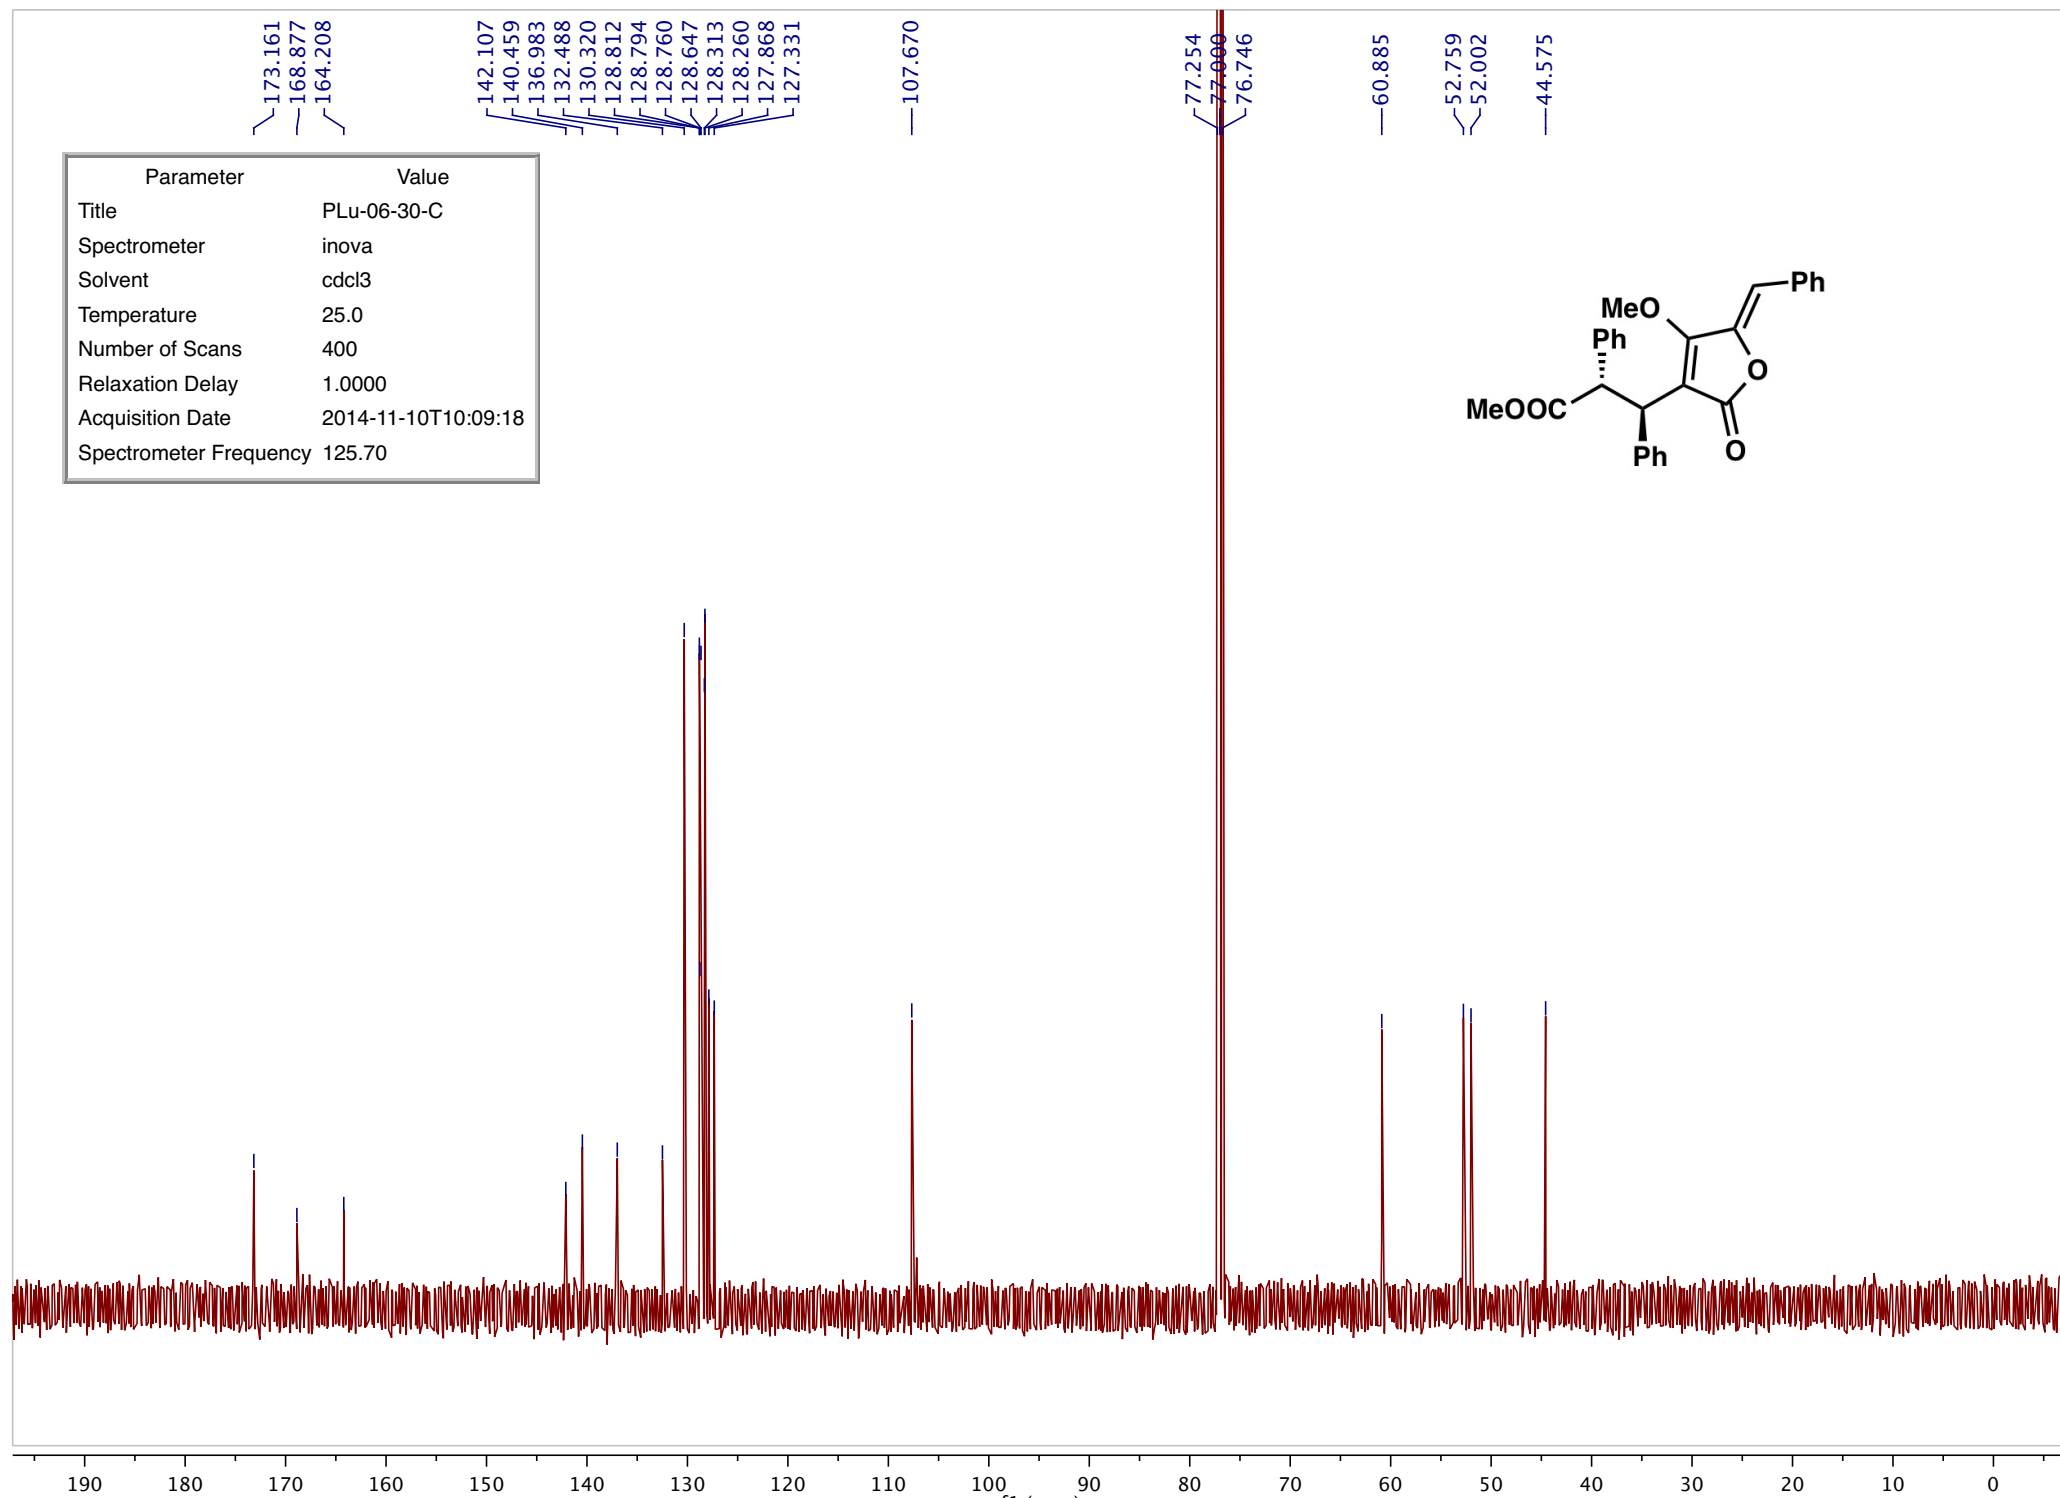

## ==== Shimadzu LCsolution Analysis Report ====

C:\LabSolutions\Data\Project1\PLu\PLu-05-35a.lcd

Acquired by : Admin  
 Sample Name : PLu-05-35  
 Sample ID : PLu-05-35  
 Vial # :  
 Injection Volume : 20 uL  
 Data File Name : PLu-05-35a.lcd  
 Method File Name : ATH-OD-J-analytical-hplc.lcm  
 Batch File Name :  
 Report File Name : Default.lcr  
 Data Acquired : 4/3/2014 6:54:56 PM  
 Data Processed : 4/3/2014 7:37:17 PM

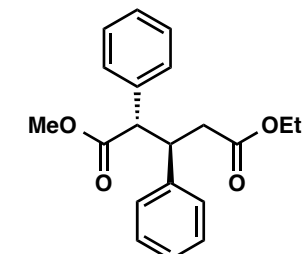**3a**

methyl ester

## &lt;Chromatogram&gt;

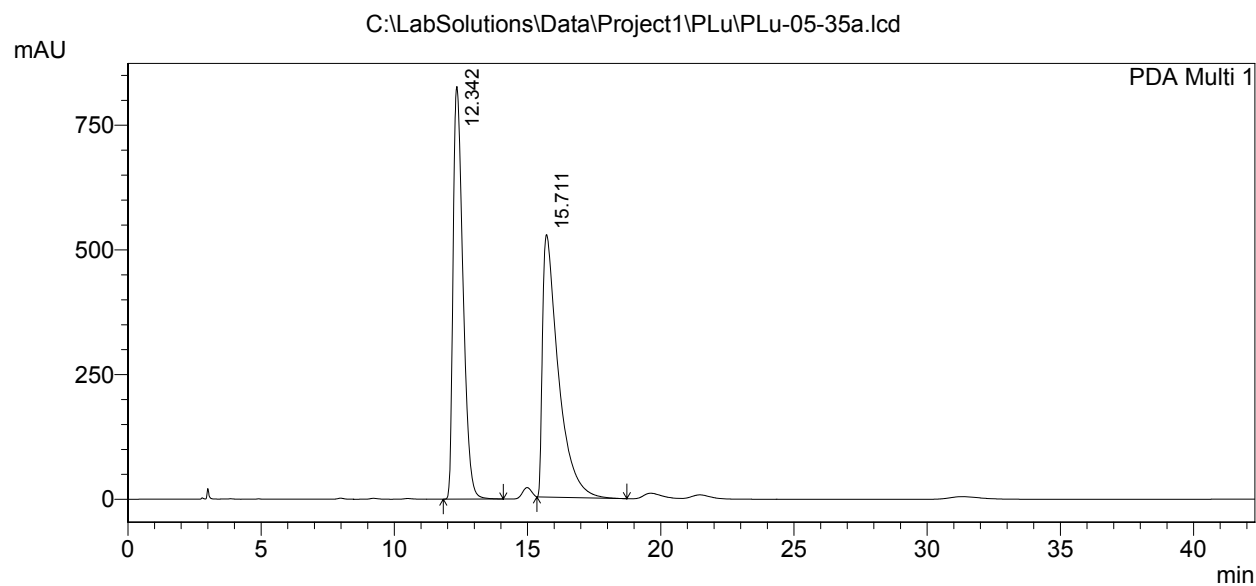

PeakTable

PDA Ch1 215nm 4nm

| Peak# | Ret. Time | Area     | Height  | Area %  | Height % |
|-------|-----------|----------|---------|---------|----------|
| 1     | 12.342    | 21412707 | 827543  | 49.560  | 61.130   |
| 2     | 15.711    | 21793027 | 526201  | 50.440  | 38.870   |
| Total |           | 43205734 | 1353744 | 100.000 | 100.000  |

## ==== Shimadzu LCsolution Analysis Report ====

C:\LabSolutions\Data\Project1\PLu\PLu-05-46a.lcd

Acquired by : Admin  
 Sample Name : PLu-05-46  
 Sample ID : PLu-05-46  
 Vial # :  
 Injection Volume : 10 uL  
 Data File Name : PLu-05-46a.lcd  
 Method File Name : ATH-OD-J-analytical-hplc.lcm  
 Batch File Name :  
 Report File Name : Default.lcr  
 Data Acquired : 4/12/2014 1:18:40 PM  
 Data Processed : 4/12/2014 1:51:24 PM

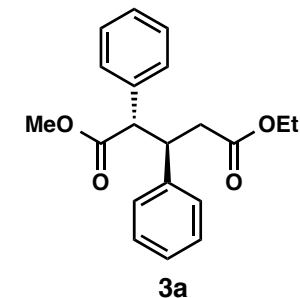

## &lt;Chromatogram&gt;

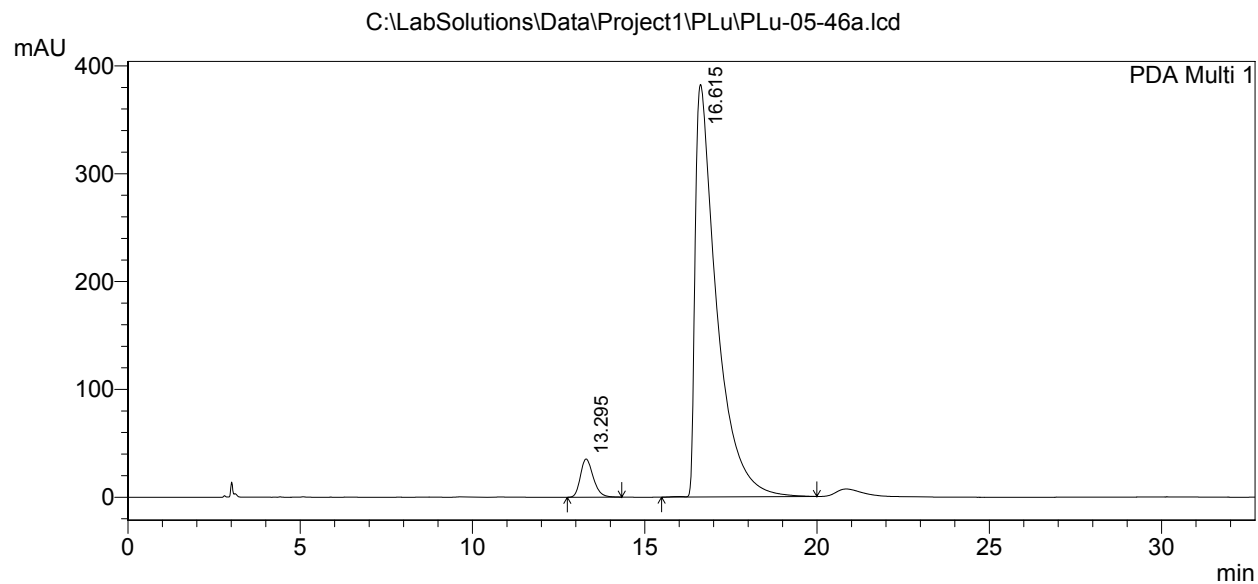

PeakTable

PDA Ch1 215nm 4nm

| Peak# | Ret. Time | Area     | Height | Area %  | Height % |
|-------|-----------|----------|--------|---------|----------|
| 1     | 13.295    | 917124   | 35456  | 5.244   | 8.482    |
| 2     | 16.615    | 16572137 | 382547 | 94.756  | 91.518   |
| Total |           | 17489261 | 418003 | 100.000 | 100.000  |

## ==== Shimadzu LCsolution Analysis Report ====

C:\LabSolutions\Data\Project1\PLu\PLu-05-39.lcd

Acquired by : Admin  
 Sample Name : PLu-05-39  
 Sample ID : PLu-05-39  
 Vial # :  
 Injection Volume : 20 uL  
 Data File Name : PLu-05-39.lcd  
 Method File Name : ATH-OD-J-analytical-hplc.lcm  
 Batch File Name :  
 Report File Name : Default.lcr  
 Data Acquired : 4/4/2014 5:38:28 PM  
 Data Processed : 4/4/2014 6:53:25 PM

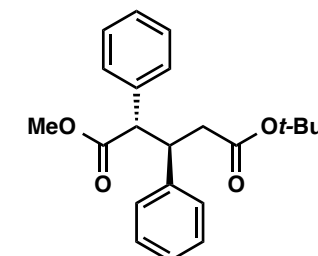

**3b**  
methyl ester

## &lt;Chromatogram&gt;

C:\LabSolutions\Data\Project1\PLu\PLu-05-39.lcd

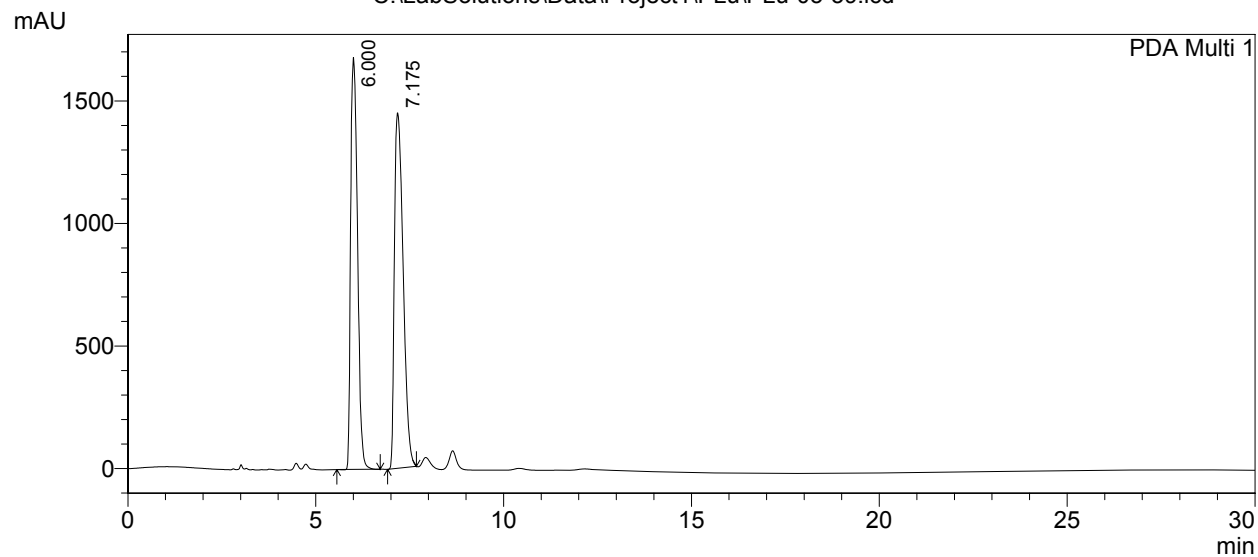

1 PDA Multi 1/215nm 4nm

PeakTable

PDA Ch1 215nm 4nm

| Peak# | Ret. Time | Area     | Height  | Area %  | Height % |
|-------|-----------|----------|---------|---------|----------|
| 1     | 6.000     | 21354813 | 1681203 | 47.604  | 53.682   |
| 2     | 7.175     | 23504925 | 1450553 | 52.396  | 46.318   |
| Total |           | 44859738 | 3131756 | 100.000 | 100.000  |

## ==== Shimadzu LCsolution Analysis Report ====

C:\LabSolutions\Data\Project1\PLu\PLu-05-51b.lcd

Acquired by : Admin  
 Sample Name : PLu-05-51  
 Sample ID : PLu-05-51  
 Vial # :  
 Injection Volume : 10 uL  
 Data File Name : PLu-05-51b.lcd  
 Method File Name : ATH-OD-J-analytical-hplc.lcm  
 Batch File Name :  
 Report File Name : Default.lcr  
 Data Acquired : 4/15/2014 5:42:42 PM  
 Data Processed : 4/15/2014 6:19:20 PM

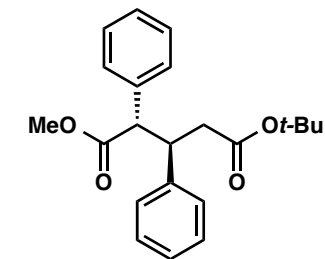

**3b**  
methyl ester

## &lt;Chromatogram&gt;

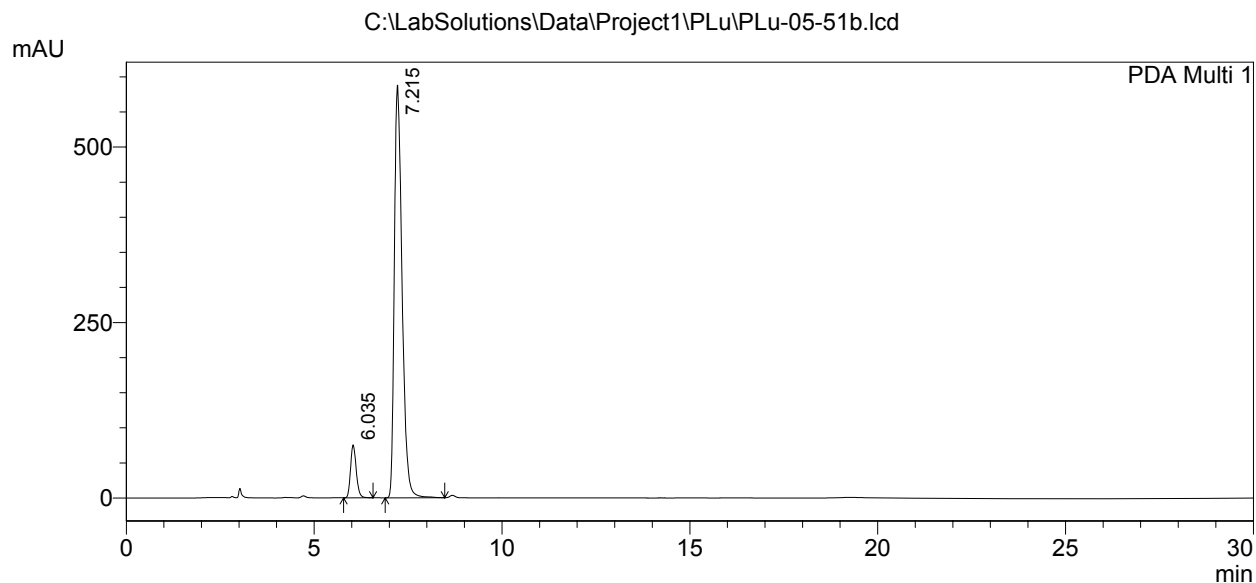

1 PDA Multi 1/215nm 4nm

PeakTable

PDA Ch1 215nm 4nm

| Peak# | Ret. Time | Area    | Height | Area %  | Height % |
|-------|-----------|---------|--------|---------|----------|
| 1     | 6.035     | 796193  | 75458  | 8.616   | 11.376   |
| 2     | 7.215     | 8444273 | 587839 | 91.384  | 88.624   |
| Total |           | 9240465 | 663297 | 100.000 | 100.000  |

## ==== Shimadzu LCsolution Analysis Report ====

C:\LabSolutions\Data\Project1\PLu\PLu-05-37a.lcd

Acquired by : Admin  
 Sample Name : PLu-05-37  
 Sample ID : PLu-05-37  
 Vial # :  
 Injection Volume : 20 uL  
 Data File Name : PLu-05-37a.lcd  
 Method File Name : ATH-OD-J-analytical-hplc.lcm  
 Batch File Name :  
 Report File Name : Default.lcr  
 Data Acquired : 4/4/2014 1:30:29 PM  
 Data Processed : 7/8/2014 5:23:52 PM

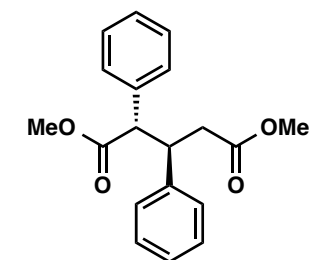**3c**

methyl ester

## &lt;Chromatogram&gt;

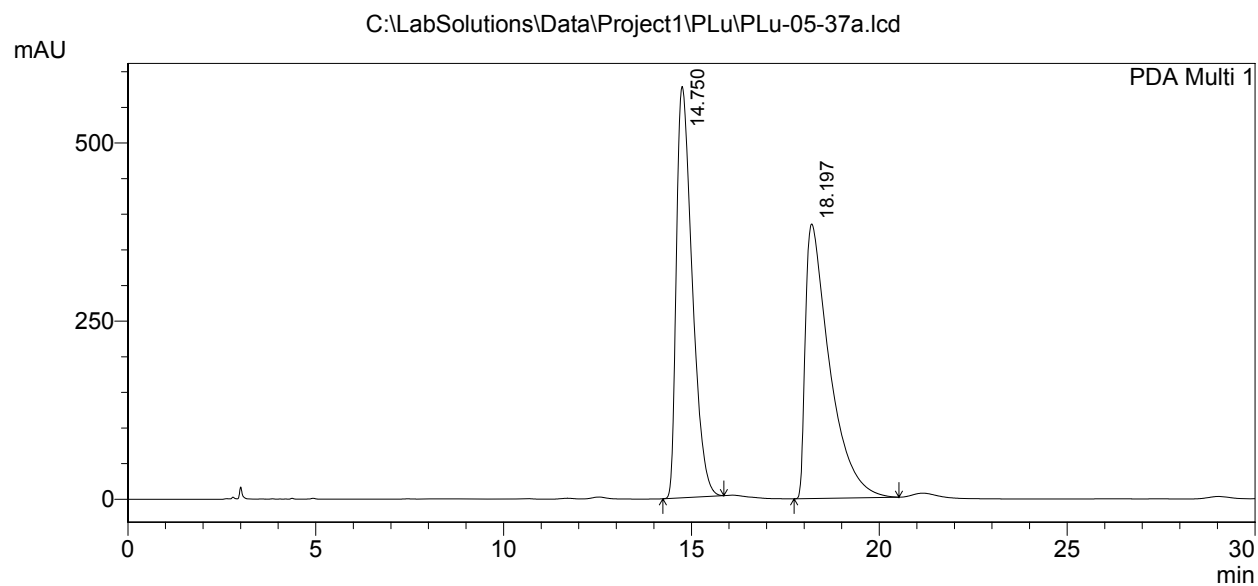

PeakTable

PDA Ch1 215nm 4nm

| Peak# | Ret. Time | Area     | Height | Area %  | Height % |
|-------|-----------|----------|--------|---------|----------|
| 1     | 14.750    | 16879741 | 577355 | 49.432  | 59.970   |
| 2     | 18.197    | 17267500 | 385381 | 50.568  | 40.030   |
| Total |           | 34147240 | 962736 | 100.000 | 100.000  |

## ==== Shimadzu LCsolution Analysis Report ====

C:\LabSolutions\Data\Project1\PLu\PLu-05-49a.lcd

Acquired by : Admin  
Sample Name : PLu-05-49  
Sample ID : PLu-05-49  
Vial # :  
Injection Volume : 10 uL  
Data File Name : PLu-05-49a.lcd  
Method File Name : ATH-OD-J-analytical-hplc.lcm  
Batch File Name :  
Report File Name : Default.lcr  
Data Acquired : 4/14/2014 5:29:47 PM  
Data Processed : 4/14/2014 6:37:38 PM

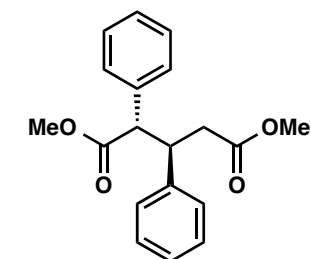

3c

methyl ester

## &lt;Chromatogram&gt;

C:\LabSolutions\Data\Project1\PLu\PLu-05-49a.lcd

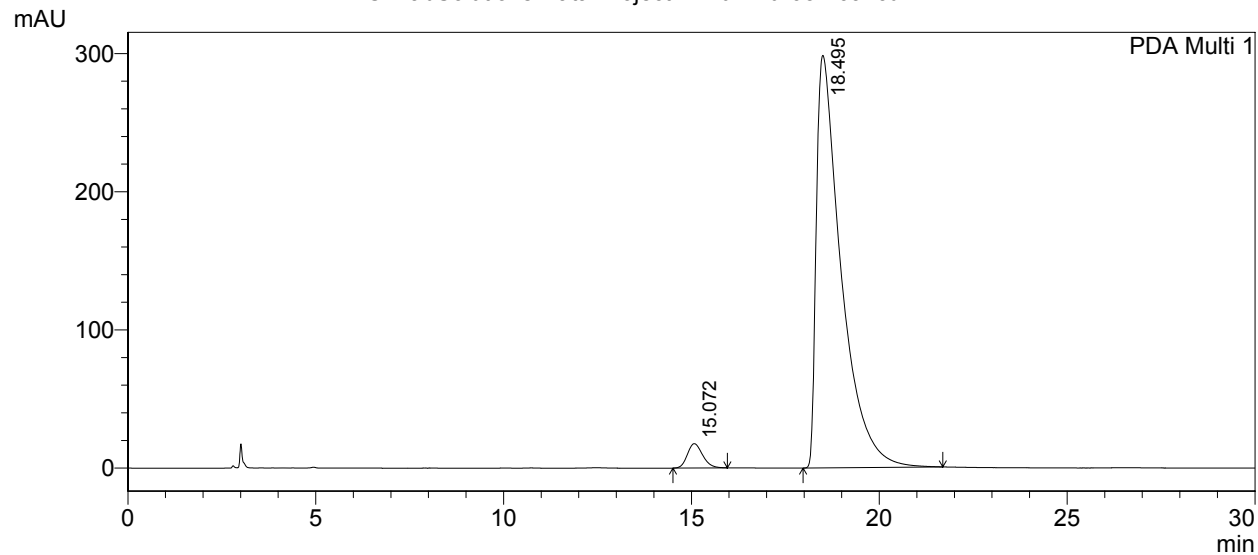

1 PDA Multi 1/210nm 4nm

PeakTable

PDA Ch1 210nm 4nm

| Peak# | Ret. Time | Area     | Height | Area %  | Height % |
|-------|-----------|----------|--------|---------|----------|
| 1     | 15.072    | 496602   | 17625  | 3.505   | 5.575    |
| 2     | 18.495    | 13672080 | 298532 | 96.495  | 94.425   |
| Total |           | 14168682 | 316157 | 100.000 | 100.000  |

## ==== Shimadzu LCsolution Analysis Report ====

C:\LabSolutions\Data\Project1\PLu\PLu-05-66Me-a.lcd

Acquired by : Admin  
 Sample Name : PLu-05-66Me  
 Sample ID : PLu-05-66Me  
 Vial # :  
 Injection Volume : 10 uL  
 Data File Name : PLu-05-66Me-a.lcd  
 Method File Name : ATH-OD-J-analytical-hplc.lcm  
 Batch File Name :  
 Report File Name : Default.lcr  
 Data Acquired : 4/29/2014 8:55:50 AM  
 Data Processed : 5/6/2014 2:01:20 PM

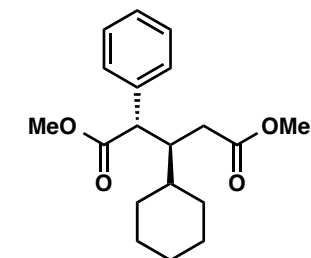

4

methyl ester

## &lt;Chromatogram&gt;

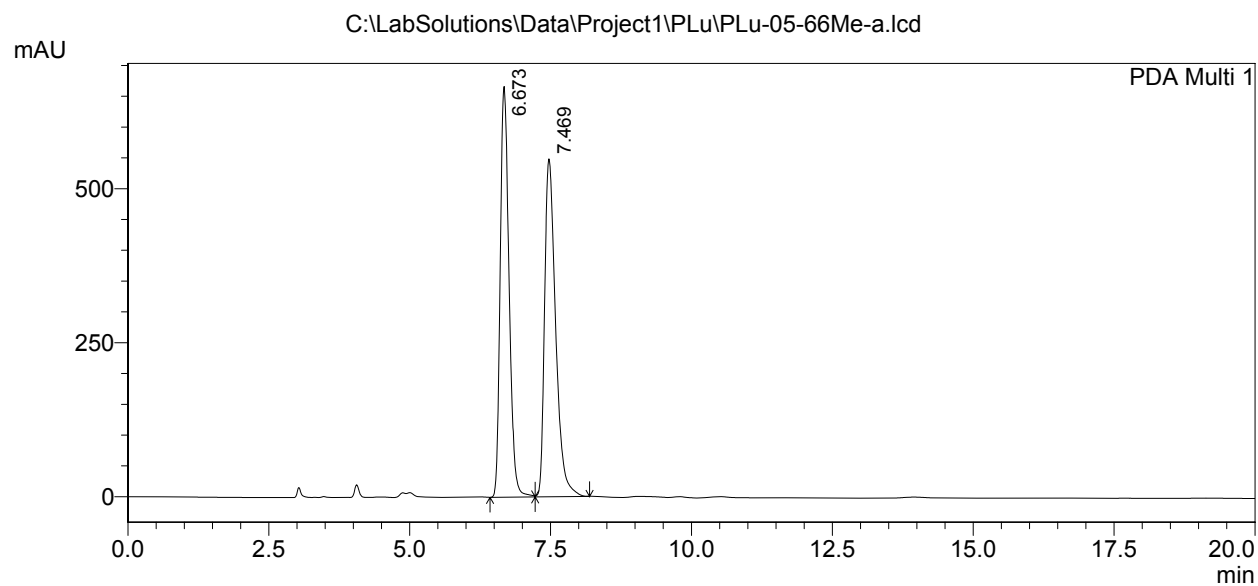

PeakTable

PDA Ch1 215nm 4nm

| Peak# | Ret. Time | Area     | Height  | Area %  | Height % |
|-------|-----------|----------|---------|---------|----------|
| 1     | 6.673     | 7274620  | 666845  | 49.339  | 54.864   |
| 2     | 7.469     | 7469594  | 548614  | 50.661  | 45.136   |
| Total |           | 14744213 | 1215459 | 100.000 | 100.000  |



## ==== Shimadzu LCsolution Analysis Report ====

C:\LabSolutions\Data\Project1\PLu\PLu-05-106-Me-a.lcd

Acquired by : Admin  
 Sample Name : PLu-05-106-Me  
 Sample ID : PLu-05-106-Me  
 Vail # :  
 Injection Volume : 10 uL  
 Data File Name : PLu-05-106-Me-a.lcd  
 Method File Name : ATH-OD-J-analytical-hplc.lcm  
 Batch File Name :  
 Report File Name : Default.lcr  
 Data Acquired : 5/24/2014 5:26:08 PM  
 Data Processed : 5/24/2014 5:49:54 PM

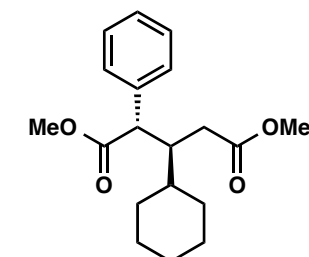

4

methylester

## &lt;Chromatogram&gt;

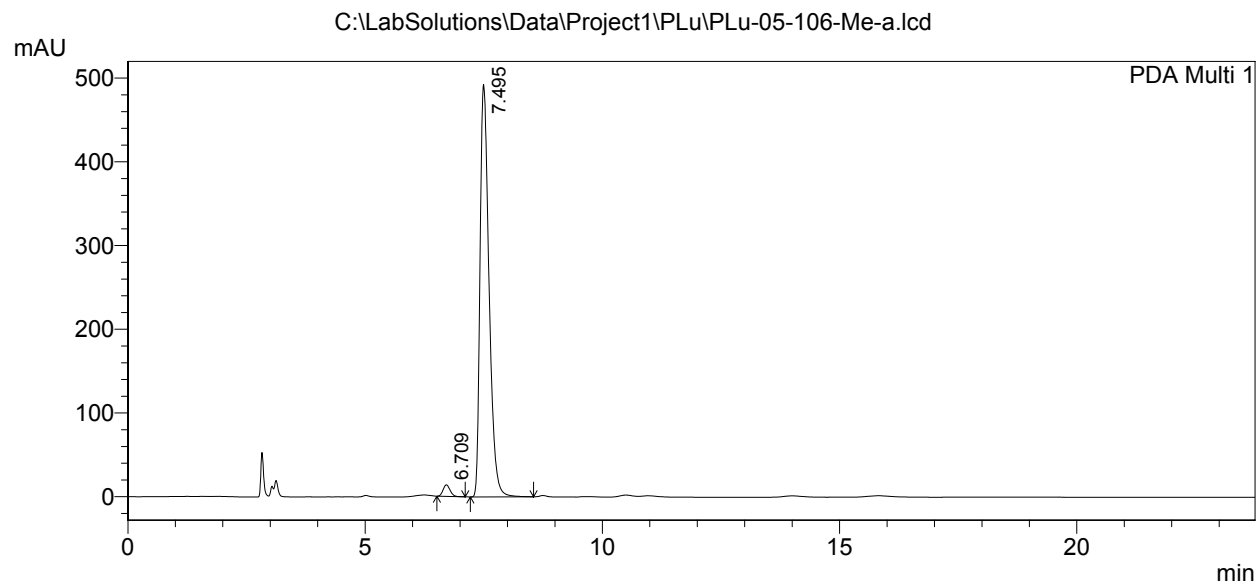

1 PDA Multi 1/215nm 4nm

PeakTable

PDA Ch1 215nm 4nm

| Peak# | Ret. Time | Area    | Height | Area %  | Height % |
|-------|-----------|---------|--------|---------|----------|
| 1     | 6.709     | 141149  | 13803  | 2.128   | 2.725    |
| 2     | 7.495     | 6490632 | 492665 | 97.872  | 97.275   |
| Total |           | 6631780 | 506467 | 100.000 | 100.000  |

## ==== Shimadzu LCsolution Analysis Report ====

C:\LabSolutions\Data\Project1\PLu\PLu-05-123Me-testa.lcd.lcd  
 Acquired by : Admin  
 Sample Name : PLu-05-123Me  
 Sample ID : PLu-05-123Me  
 Vial # :  
 Injection Volume : 10 uL  
 Data File Name : PLu-05-123Me-testa.lcd.lcd  
 Method File Name : ATH-OD-J-analytical-hplc.lcm  
 Batch File Name :  
 Report File Name : Default.lcr  
 Data Acquired : 6/11/2014 11:02:53 AM  
 Data Processed : 6/11/2014 12:02:25 PM

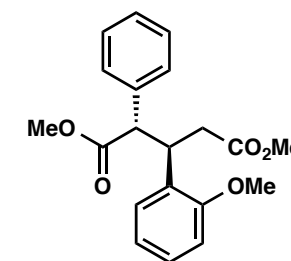

**5a**  
methyl ester

## &lt;Chromatogram&gt;

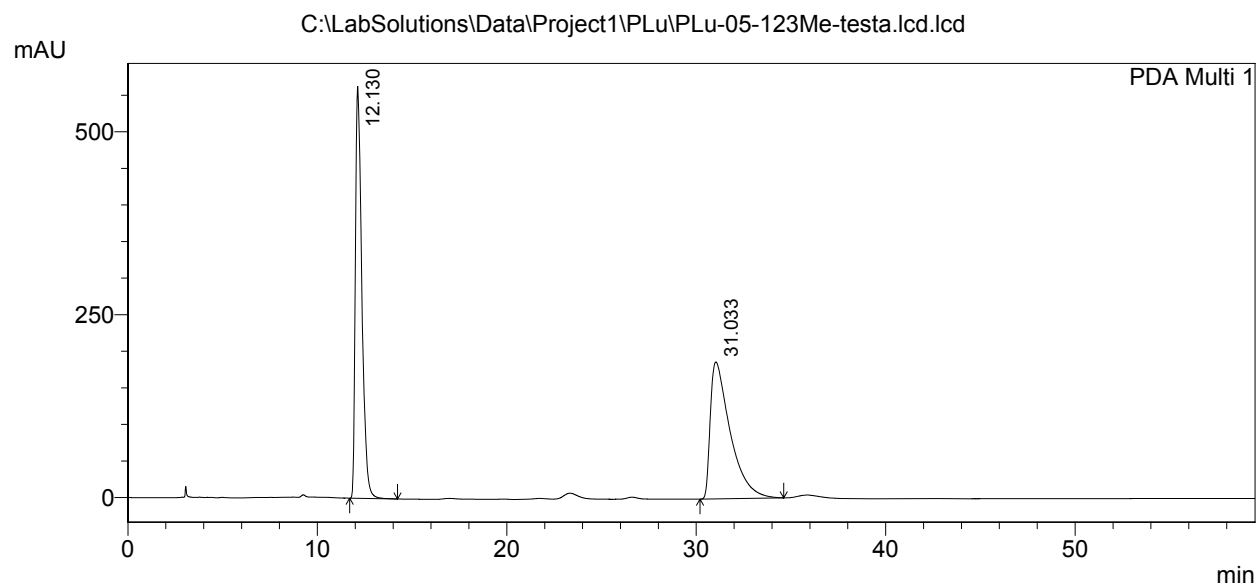

1 PDA Multi 1/215nm 4nm

PeakTable

PDA Ch1 215nm 4nm

| Peak# | Ret. Time | Area     | Height | Area %  | Height % |
|-------|-----------|----------|--------|---------|----------|
| 1     | 12.130    | 13370725 | 563118 | 49.532  | 75.050   |
| 2     | 31.033    | 13623258 | 187210 | 50.468  | 24.950   |
| Total |           | 26993983 | 750327 | 100.000 | 100.000  |

## ==== Shimadzu LCsolution Analysis Report ====

C:\LabSolutions\Data\Project1\PLu\PLu-05-128Me-bb.lcd.lcd

Acquired by : Admin  
 Sample Name : PLu-05-128Me  
 Sample ID : PLu-05-128Me  
 Vial # :  
 Injection Volume : 10 uL  
 Data File Name : PLu-05-128Me-bb.lcd.lcd  
 Method File Name : ATH-OD-J-analytical-hplc.lcm  
 Batch File Name :  
 Report File Name : Default.lcr  
 Data Acquired : 6/11/2014 12:09:43 PM  
 Data Processed : 6/11/2014 12:58:54 PM

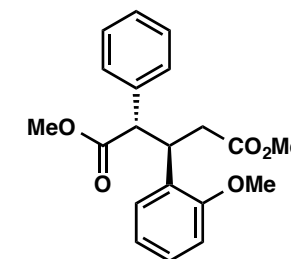

**5a**  
methyl ester

## &lt;Chromatogram&gt;

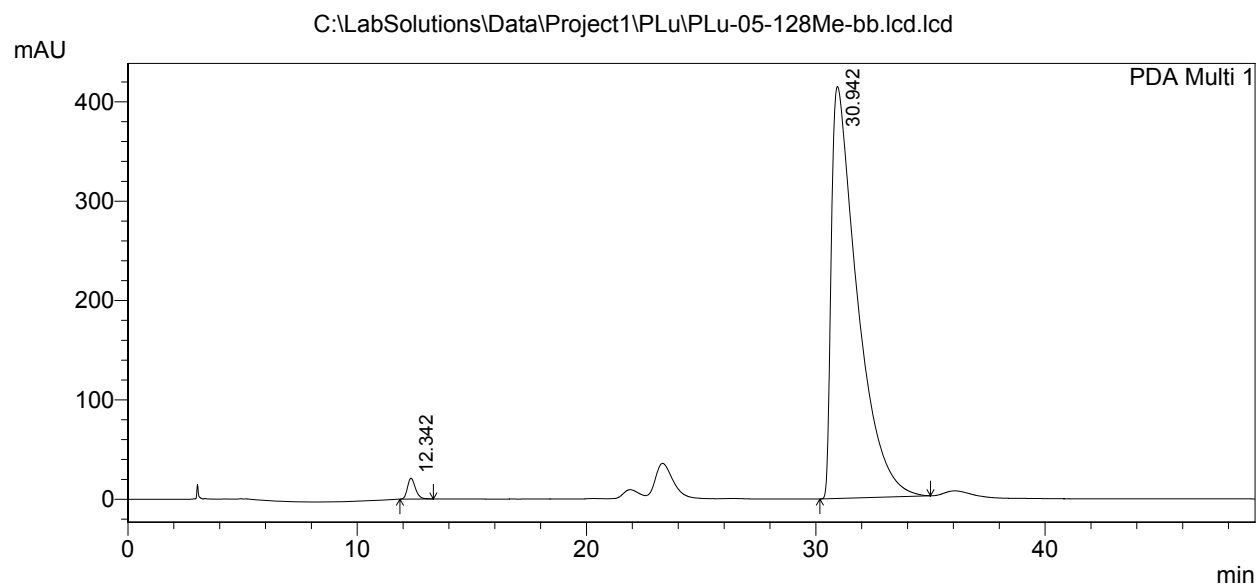

1 PDA Multi 1/215nm 4nm

PeakTable

PDA Ch1 215nm 4nm

| Peak# | Ret. Time | Area     | Height | Area %  | Height % |
|-------|-----------|----------|--------|---------|----------|
| 1     | 12.342    | 506154   | 20959  | 1.532   | 4.810    |
| 2     | 30.942    | 32523211 | 414762 | 98.468  | 95.190   |
| Total |           | 33029366 | 435721 | 100.000 | 100.000  |

## ==== Shimadzu LCsolution Analysis Report ====

C:\LabSolutions\Data\Project1\PLu\PLu-05-125Me-dd lcd.lcd

Acquired by : Admin  
 Sample Name : PLu-05-125Me  
 Sample ID : PLu-05-125Me  
 Vial # :  
 Injection Volume : 10 uL  
 Data File Name : PLu-05-125Me-dd lcd.lcd  
 Method File Name : ATH-OD-J-analytical-hplc.lcm  
 Batch File Name :  
 Report File Name : Default.lcr  
 Data Acquired : 6/10/2014 2:49:33 PM  
 Data Processed : 6/10/2014 4:38:55 PM

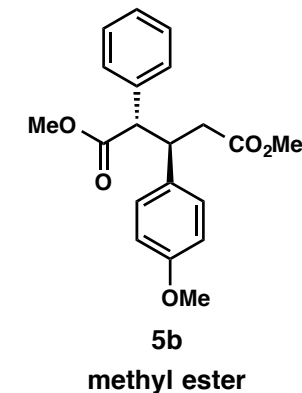

## &lt;Chromatogram&gt;

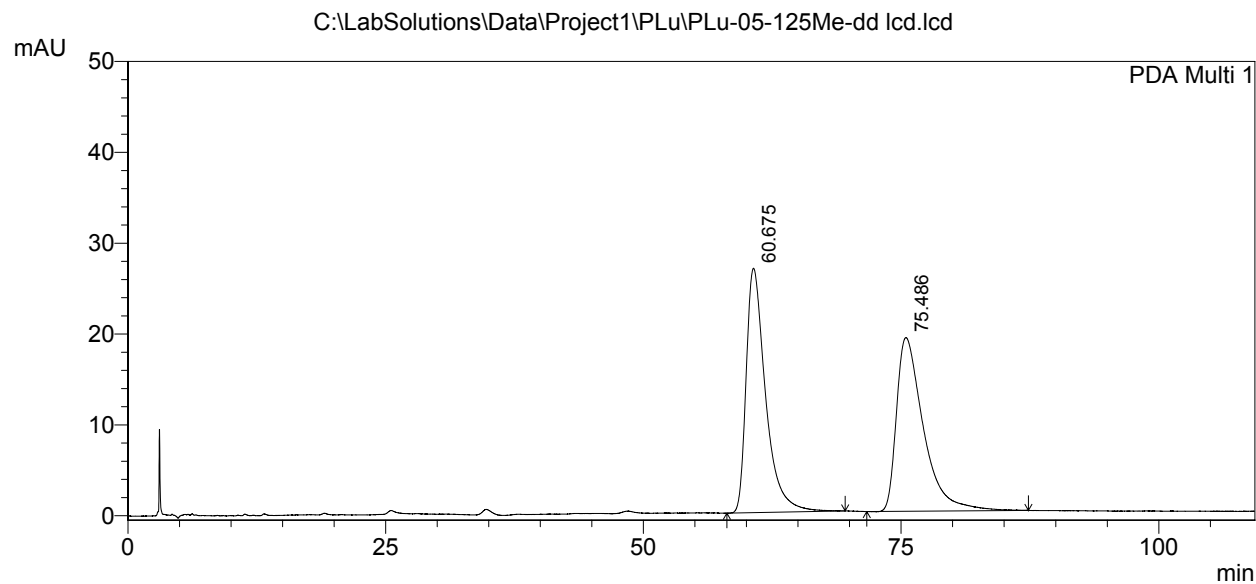

PeakTable

PDA Ch1 215nm 4nm

| Peak# | Ret. Time | Area    | Height | Area %  | Height % |
|-------|-----------|---------|--------|---------|----------|
| 1     | 60.675    | 3521802 | 26908  | 50.322  | 58.446   |
| 2     | 75.486    | 3476735 | 19131  | 49.678  | 41.554   |
| Total |           | 6998536 | 46039  | 100.000 | 100.000  |

## ==== Shimadzu LCsolution Analysis Report ====

C:\LabSolutions\Data\Project1\PLu\PLu-05-127Me-dd lcd.lcd  
 Acquired by : Admin  
 Sample Name : PLu-05-127Me  
 Sample ID : PLu-05-127Me  
 Vail # :  
 Injection Volume : 10 uL  
 Data File Name : PLu-05-127Me-dd lcd.lcd  
 Method File Name : ATH-OD-J-analytical-hplc.lcm  
 Batch File Name :  
 Report File Name : Default.lcr  
 Data Acquired : 6/10/2014 4:42:45 PM  
 Data Processed : 6/10/2014 6:12:28 PM

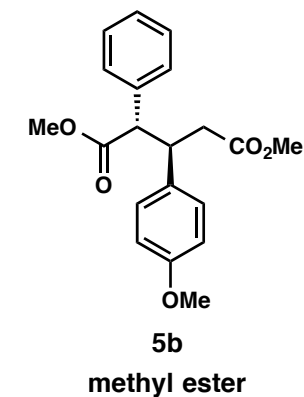

## &lt;Chromatogram&gt;

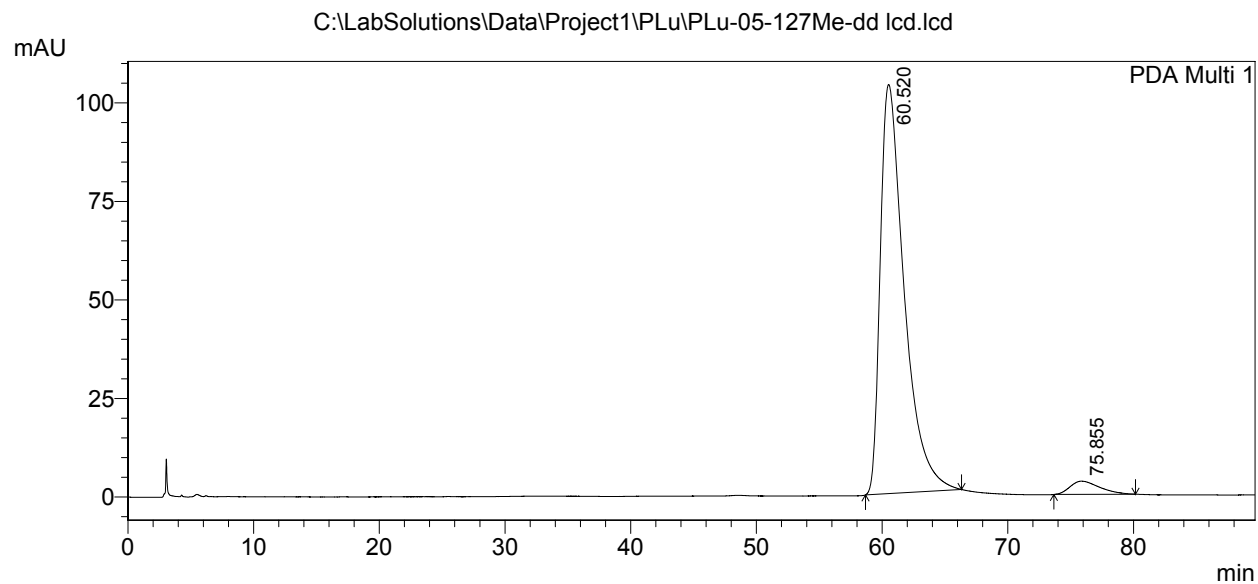

PeakTable

PDA Ch1 215nm 4nm

| Peak# | Ret. Time | Area     | Height | Area %  | Height % |
|-------|-----------|----------|--------|---------|----------|
| 1     | 60.520    | 13724082 | 103829 | 96.158  | 96.871   |
| 2     | 75.855    | 548379   | 3353   | 3.842   | 3.129    |
| Total |           | 14272461 | 107182 | 100.000 | 100.000  |

## ==== Shimadzu LCsolution Analysis Report ====

C:\LabSolutions\Data\Project1\jjj-5-242-a.lcd

Acquired by : Admin  
 Sample Name : jjj-5-242-a  
 Sample ID : jjj-5-242-a  
 Vial # :  
 Injection Volume : 10 uL  
 Data File Name : jjj-5-242-a.lcd  
 Method File Name : ATH-OD-J-analytical-hplc.lcm  
 Batch File Name :  
 Report File Name : Default.lcr  
 Data Acquired : 11/18/2014 8:42:39 AM  
 Data Processed : 11/18/2014 9:27:17 AM

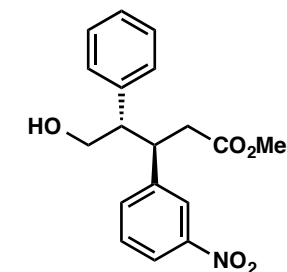

**5c**  
alcohol

## &lt;Chromatogram&gt;

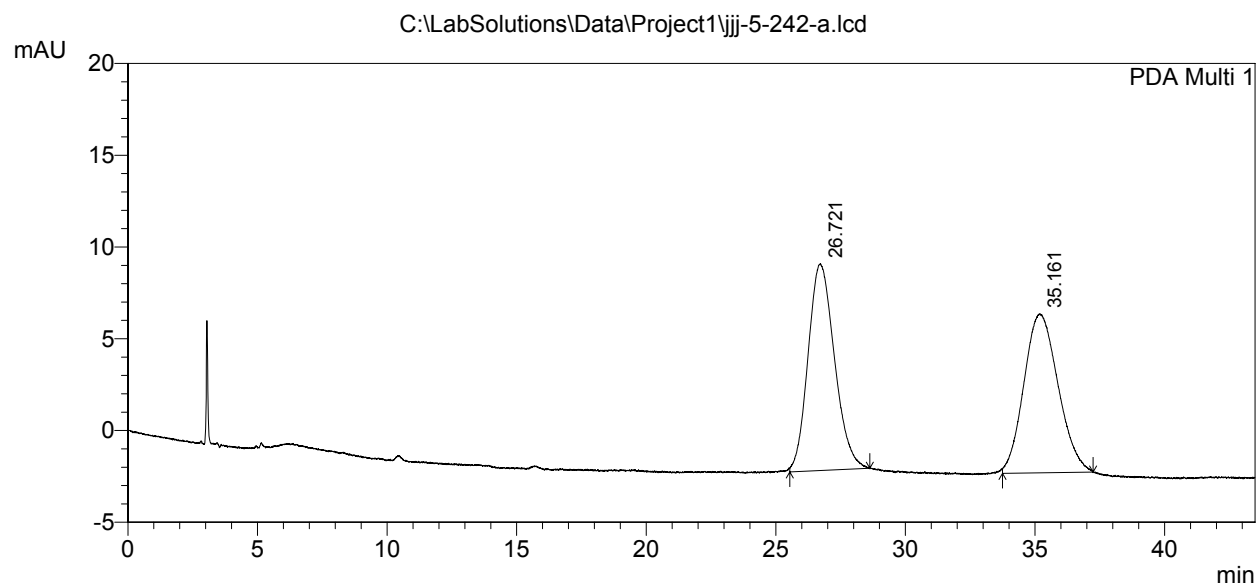

1 PDA Multi 1/210nm 4nm

PeakTable

PDA Ch1 210nm 4nm

| Peak# | Ret. Time | Area    | Height | Area %  | Height % |
|-------|-----------|---------|--------|---------|----------|
| 1     | 26.721    | 798582  | 11283  | 50.184  | 56.557   |
| 2     | 35.161    | 792717  | 8667   | 49.816  | 43.443   |
| Total |           | 1591299 | 19949  | 100.000 | 100.000  |

## ==== Shimadzu LCsolution Analysis Report ====

C:\LabSolutions\Data\Project1\jjj-5-241-a-2.lcd

Acquired by : Admin  
 Sample Name : jjj-5-241-a-2  
 Sample ID : jjj-5-241-a-2  
 Vial # :  
 Injection Volume : 10 uL  
 Data File Name : jjj-5-241-a-2.lcd  
 Method File Name : ATH-OD-J-analytical-hplc.lcm  
 Batch File Name :  
 Report File Name : Default.lcr  
 Data Acquired : 11/17/2014 3:55:27 PM  
 Data Processed : 11/18/2014 9:25:54 AM

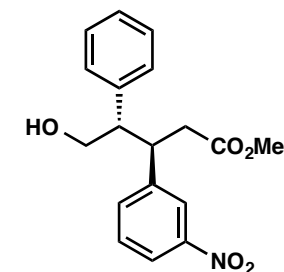

**5c**  
alcohol

## &lt;Chromatogram&gt;

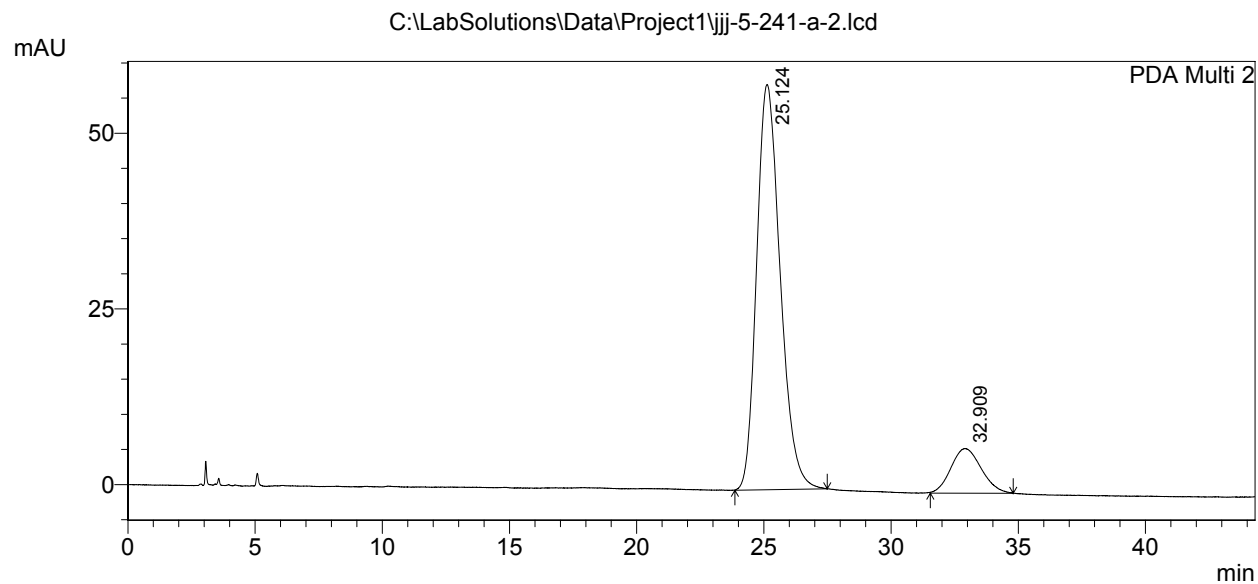

1 PDA Multi 2/215nm 4nm

PeakTable

PDA Ch2 215nm 4nm

| Peak# | Ret. Time | Area    | Height | Area %  | Height % |
|-------|-----------|---------|--------|---------|----------|
| 1     | 25.124    | 3718473 | 57687  | 87.572  | 90.074   |
| 2     | 32.909    | 527708  | 6357   | 12.428  | 9.926    |
| Total |           | 4246181 | 64044  | 100.000 | 100.000  |

## ==== Shimadzu LCsolution Analysis Report ====

C:\LabSolutions\Data\Project1\PLu\PLu-05-101Me-aaa.lcd

Acquired by : Admin  
 Sample Name : PLu-05-101Me  
 Sample ID : PLu-05-101Me  
 Vail # :  
 Injection Volume : 10 uL  
 Data File Name : PLu-05-101Me-aaa.lcd  
 Method File Name : ATH-OD-J-analytical-hplc.lcm  
 Batch File Name :  
 Report File Name : Default.lcr  
 Data Acquired : 6/7/2014 5:22:57 PM  
 Data Processed : 6/7/2014 5:42:58 PM

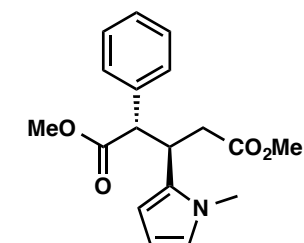

**5d**  
methyl ester

## &lt;Chromatogram&gt;

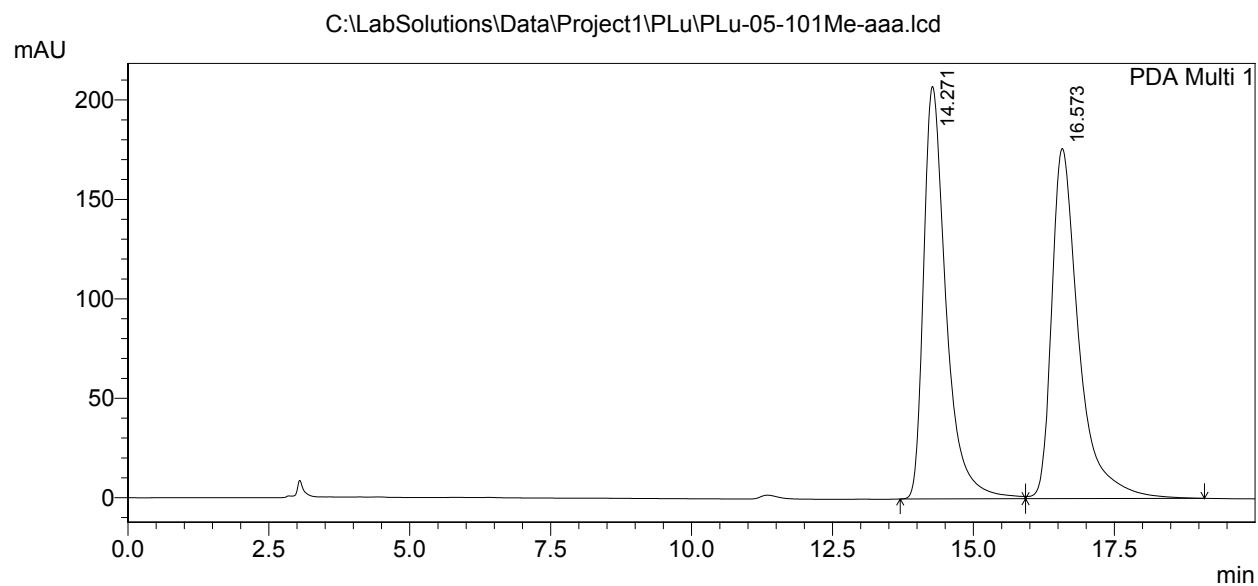

PeakTable

PDA Ch1 215nm 4nm

| Peak# | Ret. Time | Area     | Height | Area %  | Height % |
|-------|-----------|----------|--------|---------|----------|
| 1     | 14.271    | 5737902  | 207418 | 49.389  | 54.085   |
| 2     | 16.573    | 5879821  | 176083 | 50.611  | 45.915   |
| Total |           | 11617723 | 383501 | 100.000 | 100.000  |



## ==== Shimadzu LCsolution Analysis Report ====

C:\LabSolutions\Data\Project1\PLu\PLu-05-126Me-a.lcd

Acquired by : Admin  
 Sample Name : PLu-05-126Me  
 Sample ID : PLu-05-126Me  
 Vial # :  
 Injection Volume : 10 uL  
 Data File Name : PLu-05-126Me-a.lcd  
 Method File Name : ATH-OD-J-analytical-hplc.lcm  
 Batch File Name :  
 Report File Name : Default.lcr  
 Data Acquired : 6/7/2014 4:40:34 PM  
 Data Processed : 6/7/2014 5:15:05 PM

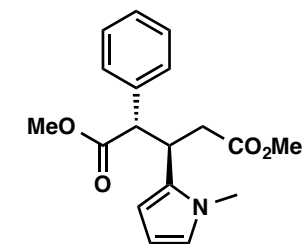

**5d**  
methyl ester

## &lt;Chromatogram&gt;

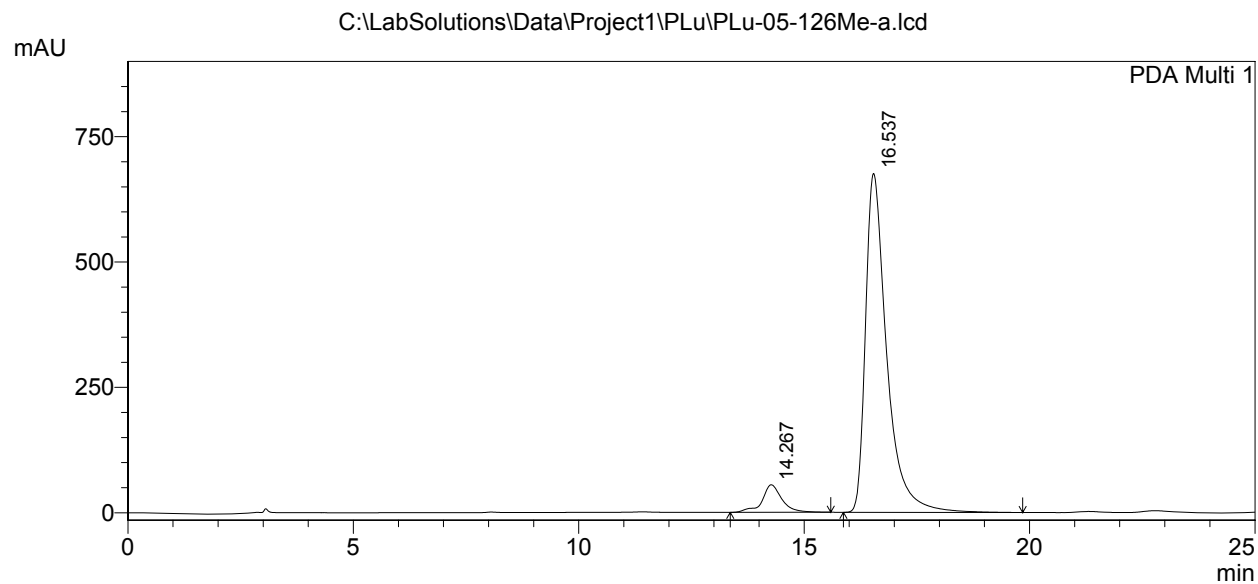

1 PDA Multi 1/215nm 4nm

PeakTable

PDA Ch1 215nm 4nm

| Peak# | Ret. Time | Area     | Height | Area %  | Height % |
|-------|-----------|----------|--------|---------|----------|
| 1     | 14.267    | 1676791  | 54964  | 7.054   | 7.519    |
| 2     | 16.537    | 22095373 | 676045 | 92.946  | 92.481   |
| Total |           | 23772163 | 731010 | 100.000 | 100.000  |

## ==== Shimadzu LCsolution Analysis Report ====

C:\LabSolutions\Data\Project1\PLu\PLu-05-226-01.lcd

Acquired by : Admin  
 Sample Name : PLu-05-226  
 Sample ID : PLu-05-226  
 Vial # :  
 Injection Volume : 10 uL  
 Data File Name : PLu-05-226-01.lcd  
 Method File Name : ATH-OD-J-analytical-hplc.lcm  
 Batch File Name :  
 Report File Name : Default.lcr  
 Data Acquired : 8/27/2014 9:51:57 AM  
 Data Processed : 8/27/2014 10:44:07 AM

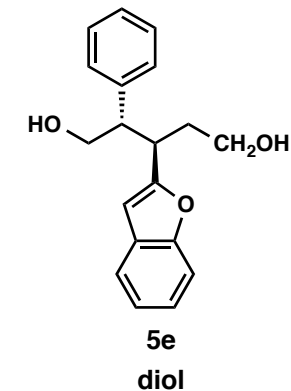

## &lt;Chromatogram&gt;

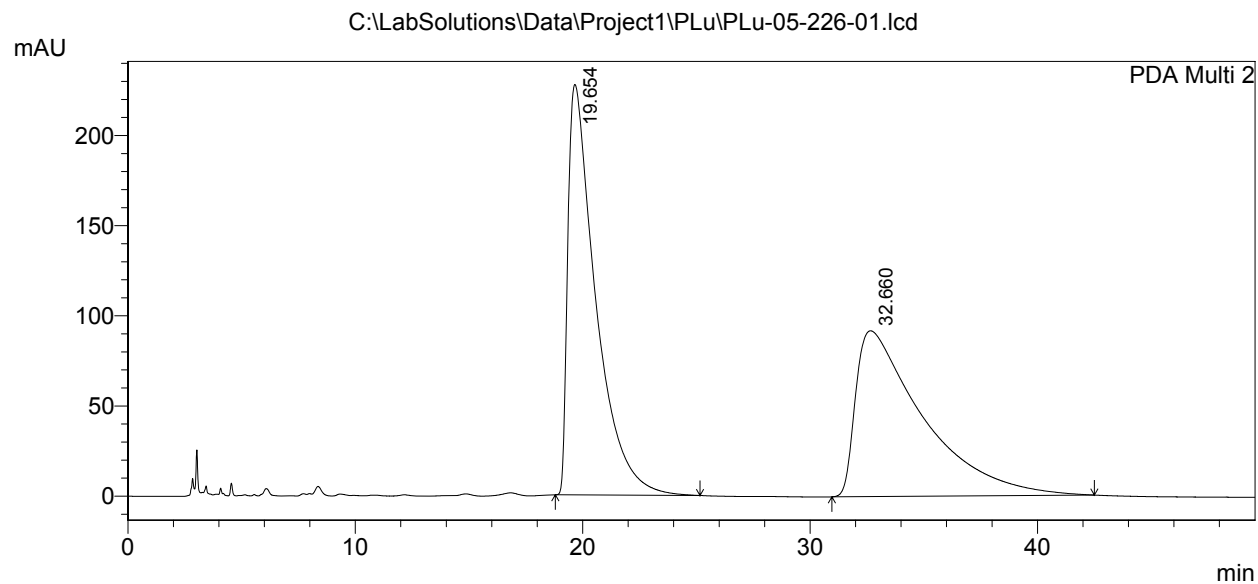

1 PDA Multi 2/215nm 4nm

PeakTable

PDA Ch2 215nm 4nm

| Peak# | Ret. Time | Area     | Height | Area %  | Height % |
|-------|-----------|----------|--------|---------|----------|
| 1     | 19.654    | 19377682 | 227621 | 50.573  | 71.226   |
| 2     | 32.660    | 18938853 | 91955  | 49.427  | 28.774   |
| Total |           | 38316535 | 319576 | 100.000 | 100.000  |

## ==== Shimadzu LCsolution Analysis Report ====

C:\LabSolutions\Data\Project1\PLu\PLu-05-227-a.lcd

Acquired by : Admin  
 Sample Name : PLu-05-227  
 Sample ID : PLu-05-227  
 Vial # :  
 Injection Volume : 10 uL  
 Data File Name : PLu-05-227-a.lcd  
 Method File Name : ATH-OD-J-analytical-hplc.lcm  
 Batch File Name :  
 Report File Name : Default.lcr  
 Data Acquired : 8/28/2014 9:57:50 AM  
 Data Processed : 11/17/2014 2:52:48 PM

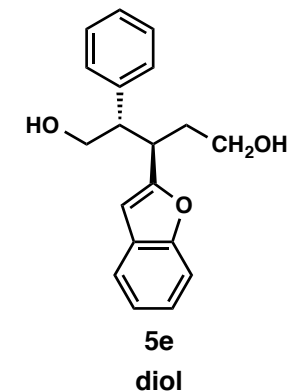

## &lt;Chromatogram&gt;

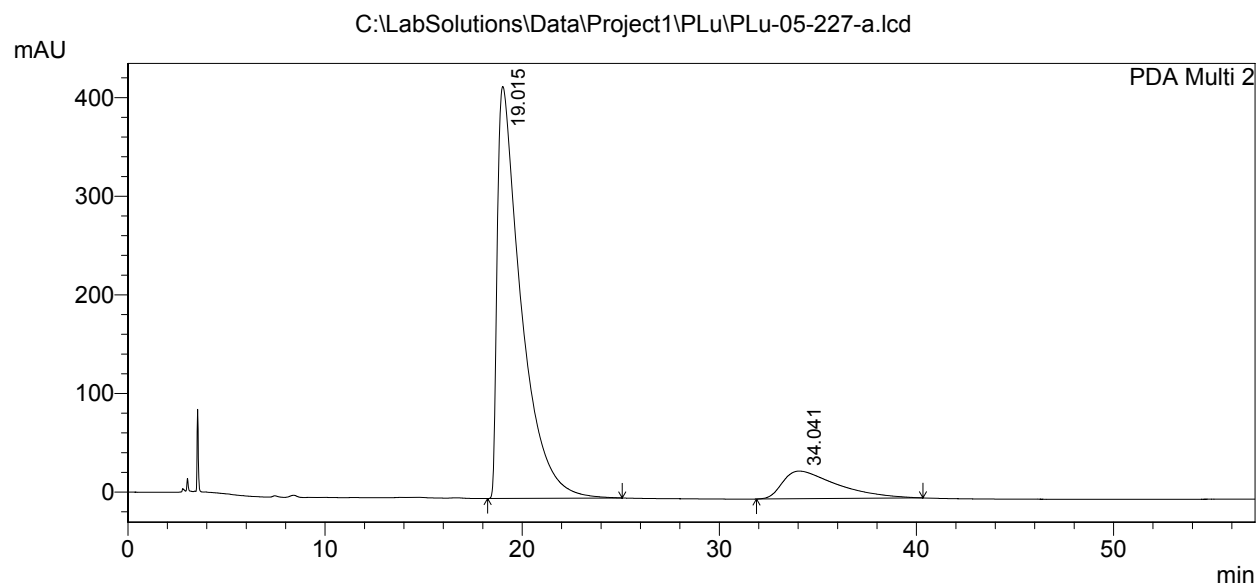

1 PDA Multi 2/215nm 4nm

PeakTable

PDA Ch2 215nm 4nm

| Peak# | Ret. Time | Area     | Height | Area %  | Height % |
|-------|-----------|----------|--------|---------|----------|
| 1     | 19.015    | 35055763 | 417781 | 86.634  | 93.707   |
| 2     | 34.041    | 5408577  | 28055  | 13.366  | 6.293    |
| Total |           | 40464341 | 445836 | 100.000 | 100.000  |

## ==== Shimadzu LCsolution Analysis Report ====

C:\LabSolutions\Data\Project1\PLu\PLu-05-100-Me-d.lcd

Acquired by : Admin  
 Sample Name : PLu-05-100-Me  
 Sample ID : PLu-05-100-Me  
 Vial # :  
 Injection Volume : 10 uL  
 Data File Name : PLu-05-100-Me-d.lcd  
 Method File Name : ATH-OD-J-analytical-hplc.lcm  
 Batch File Name :  
 Report File Name : Default.lcr  
 Data Acquired : 5/20/2014 2:24:11 PM  
 Data Processed : 5/20/2014 3:15:04 PM

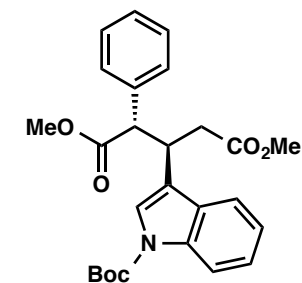

**5f**  
methyl ester

## &lt;Chromatogram&gt;

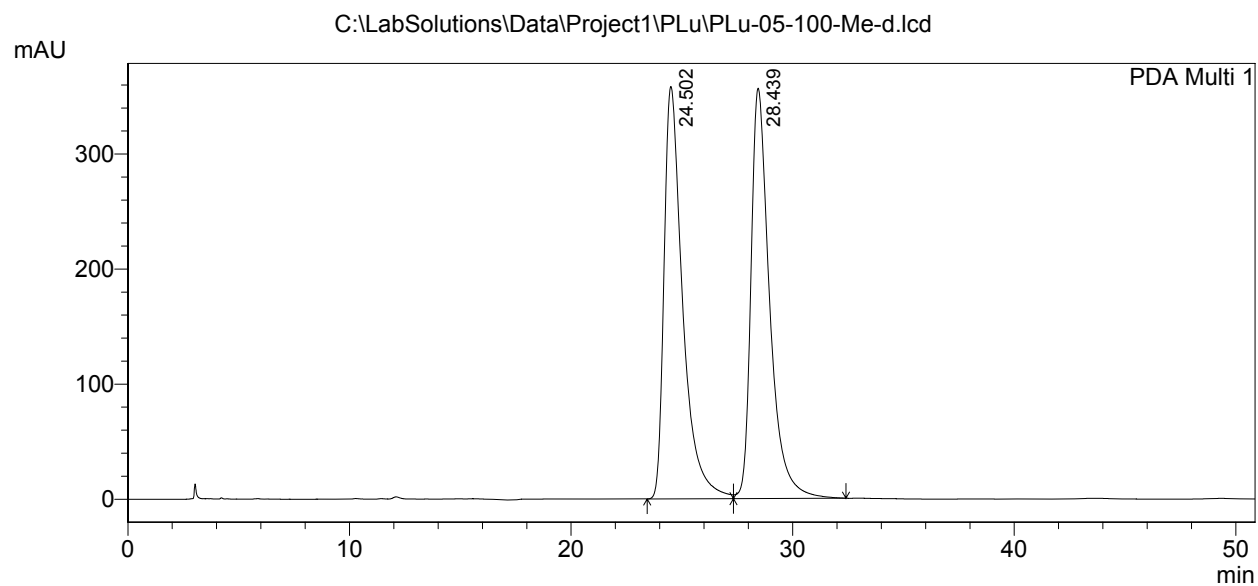

PeakTable

PDA Ch1 215nm 4nm

| Peak# | Ret. Time | Area     | Height | Area %  | Height % |
|-------|-----------|----------|--------|---------|----------|
| 1     | 24.502    | 20916152 | 358421 | 50.059  | 50.128   |
| 2     | 28.439    | 20866982 | 356596 | 49.941  | 49.872   |
| Total |           | 41783133 | 715018 | 100.000 | 100.000  |

## ==== Shimadzu LCsolution Analysis Report ====

C:\LabSolutions\Data\Project1\PLu\PLu-05-99-Me-b.lcd

Acquired by : Admin  
 Sample Name : PLu-05-99-Me  
 Sample ID : PLu-05-99-Me  
 Vial # :  
 Injection Volume : 10 uL  
 Data File Name : PLu-05-99-Me-b.lcd  
 Method File Name : ATH-OD-J-analytical-hplc.lcm  
 Batch File Name :  
 Report File Name : Default.lcr  
 Data Acquired : 5/20/2014 12:28:10 PM  
 Data Processed : 5/20/2014 1:26:01 PM

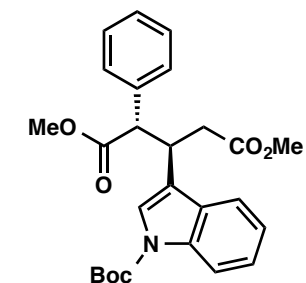

**5f**  
methyl ester

## &lt;Chromatogram&gt;

C:\LabSolutions\Data\Project1\PLu\PLu-05-99-Me-b.lcd

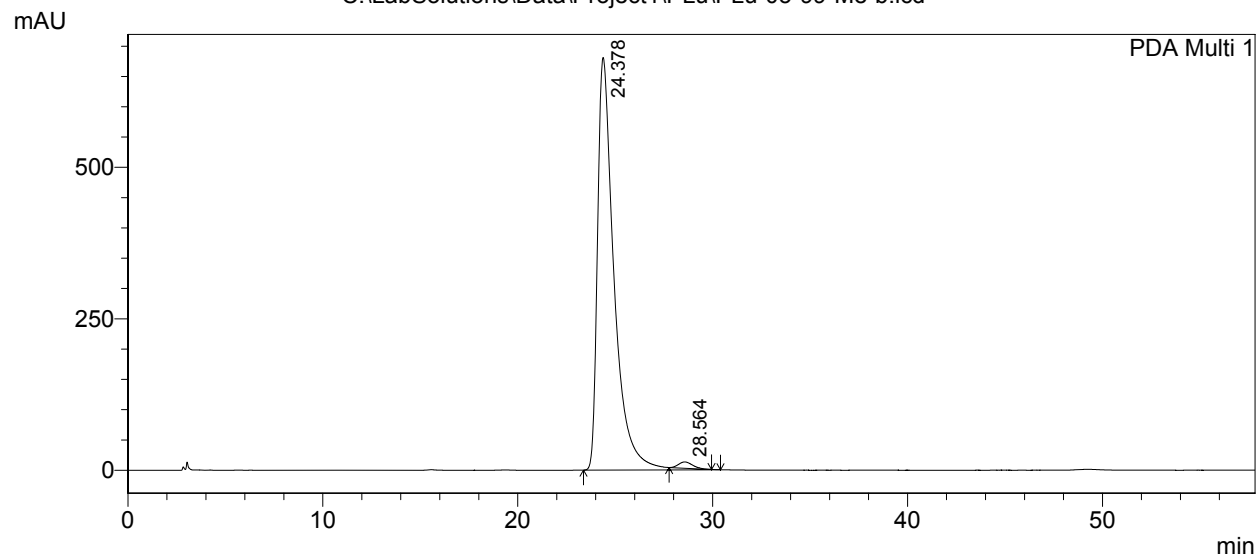

1 PDA Multi 1/215nm 4nm

PeakTable

PDA Ch1 215nm 4nm

| Peak# | Ret. Time | Area     | Height | Area %  | Height % |
|-------|-----------|----------|--------|---------|----------|
| 1     | 24.378    | 40158106 | 681092 | 98.723  | 98.497   |
| 2     | 28.564    | 519456   | 10396  | 1.277   | 1.503    |
| Total |           | 40677562 | 691488 | 100.000 | 100.000  |

## ==== Shimadzu LCsolution Analysis Report ====

C:\LabSolutions\Data\Project1\PLu\PLu-05-73Me-b.lcd

Acquired by : Admin  
 Sample Name : PLu-05-73Me  
 Sample ID : PLu-05-73Me  
 Vial # :  
 Injection Volume : 10 uL  
 Data File Name : PLu-05-73Me-b.lcd  
 Method File Name : ATH-OD-J-analytical-hplc.lcm  
 Batch File Name :  
 Report File Name : Default.lcr  
 Data Acquired : 5/2/2014 11:57:39 AM  
 Data Processed : 5/2/2014 1:19:50 PM

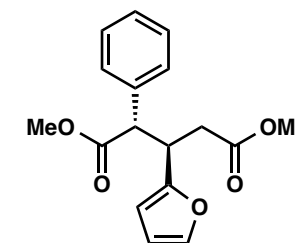

**5g**  
methyl ester

## &lt;Chromatogram&gt;

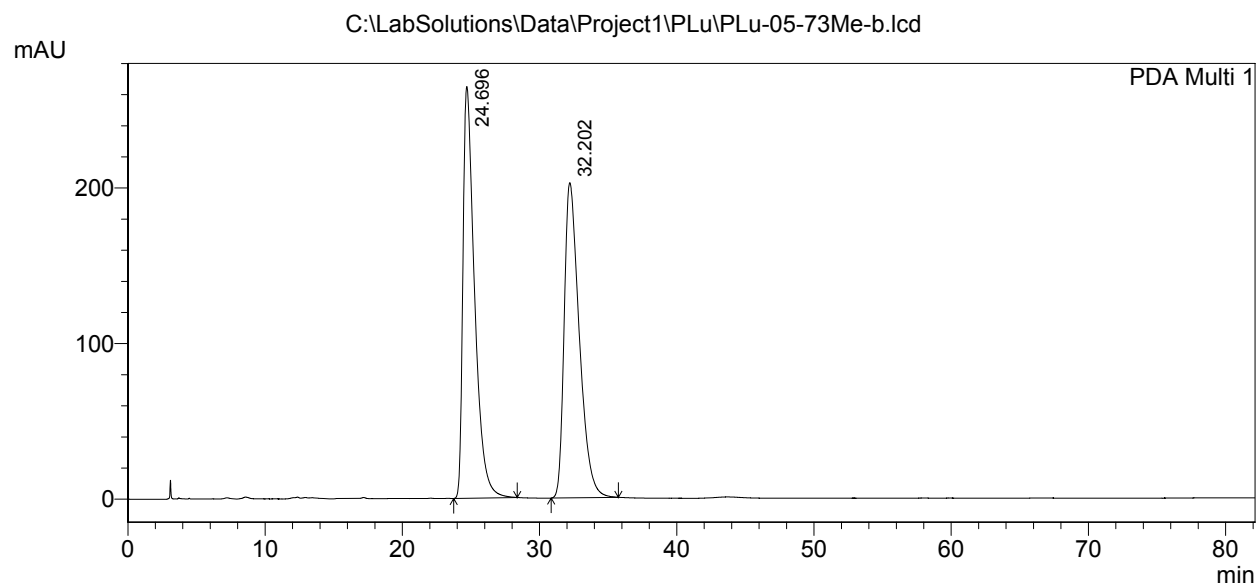

PeakTable

PDA Ch1 215nm 4nm

| Peak# | Ret. Time | Area     | Height | Area %  | Height % |
|-------|-----------|----------|--------|---------|----------|
| 1     | 24.696    | 15582434 | 264704 | 50.196  | 56.648   |
| 2     | 32.202    | 15460821 | 202573 | 49.804  | 43.352   |
| Total |           | 31043255 | 467277 | 100.000 | 100.000  |

## ==== Shimadzu LCsolution Analysis Report ====

C:\LabSolutions\Data\Project1\PLu\PLu-05-90c.lcd

Acquired by : Admin  
 Sample Name : PLu-05-90Me  
 Sample ID : PLu-05-90Me  
 Vial # :  
 Injection Volume : 10 uL  
 Data File Name : PLu-05-90c.lcd  
 Method File Name : ATH-OD-J-analytical-hplc.lcm  
 Batch File Name :  
 Report File Name : Default.lcr  
 Data Acquired : 5/13/2014 3:44:13 PM  
 Data Processed : 5/13/2014 4:35:00 PM

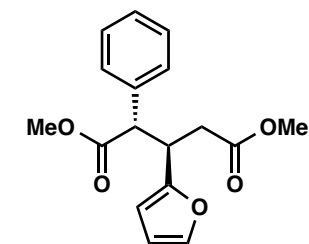

**5g**  
**methyl ester**

## &lt;Chromatogram&gt;

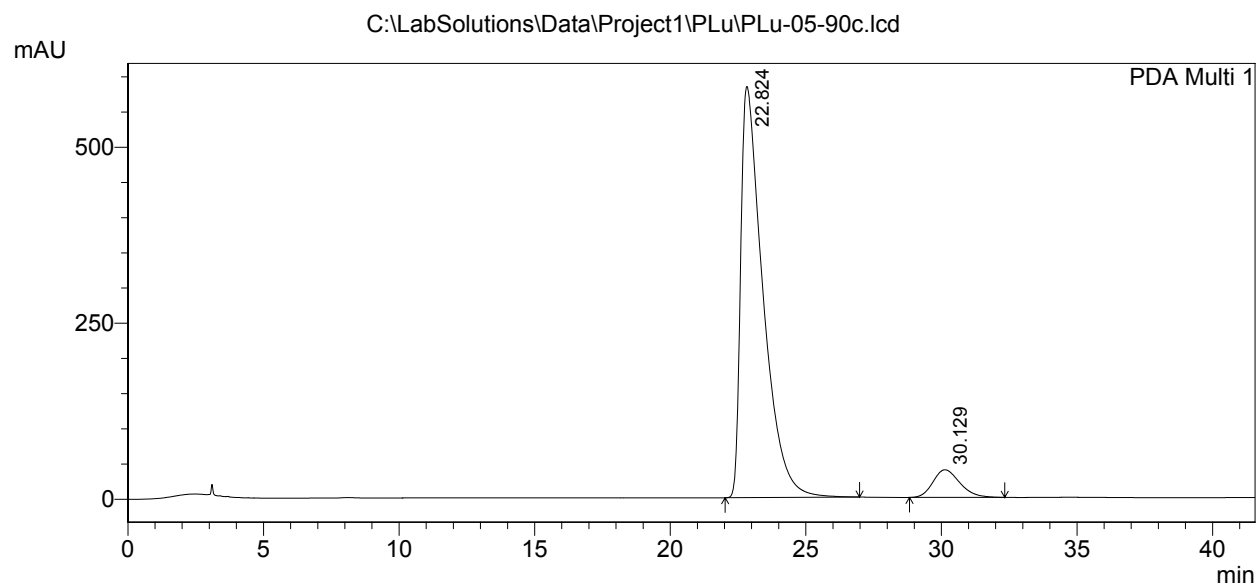

1 PDA Multi 1/215nm 4nm

PeakTable

PDA Ch1 215nm 4nm

| Peak# | Ret. Time | Area     | Height | Area %  | Height % |
|-------|-----------|----------|--------|---------|----------|
| 1     | 22.824    | 33336083 | 583990 | 92.500  | 93.706   |
| 2     | 30.129    | 2702862  | 39227  | 7.500   | 6.294    |
| Total |           | 36038946 | 623217 | 100.000 | 100.000  |

## ==== Shimadzu LCsolution Analysis Report ====

C:\LabSolutions\Data\Project1\jjj-5-101-c02.lcd

Acquired by : Admin  
 Sample Name : jjj-5-101-c  
 Sample ID : jjj-5-101-c  
 Vial # :  
 Injection Volume : 10 uL  
 Data File Name : jjj-5-101-c02.lcd  
 Method File Name : ATH-OD-J-analytical-hplc.lcm  
 Batch File Name :  
 Report File Name : Default.lcr  
 Data Acquired : 8/27/2014 5:28:47 PM  
 Data Processed : 8/27/2014 6:03:17 PM

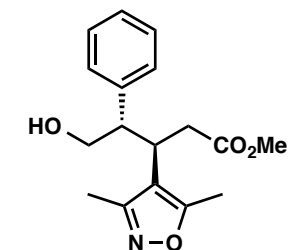

**5h**  
**alcohol**

## &lt;Chromatogram&gt;

C:\LabSolutions\Data\Project1\jjj-5-101-c02.lcd

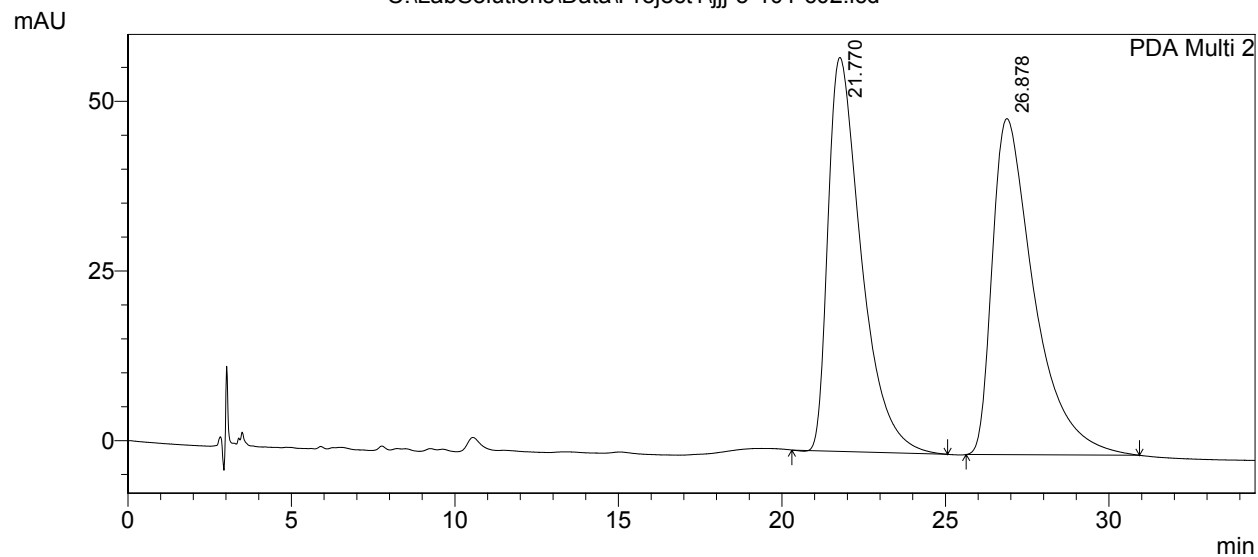

1 PDA Multi 2/215nm 4nm

PeakTable

PDA Ch2 215nm 4nm

| Peak# | Ret. Time | Area    | Height | Area %  | Height % |
|-------|-----------|---------|--------|---------|----------|
| 1     | 21.770    | 4105061 | 58063  | 48.236  | 53.962   |
| 2     | 26.878    | 4405285 | 49536  | 51.764  | 46.038   |
| Total |           | 8510346 | 107600 | 100.000 | 100.000  |



## ==== Shimadzu LCsolution Analysis Report ====

C:\LabSolutions\Data\Project1\jjj-5-107-a01.lcd

Acquired by : Admin  
 Sample Name : jjj-5-107-a  
 Sample ID : jjj-5-107-a  
 Vial # :  
 Injection Volume : 10 uL  
 Data File Name : jjj-5-107-a01.lcd  
 Method File Name : ATH-OD-J-analytical-hplc.lcm  
 Batch File Name :  
 Report File Name : Default.lcr  
 Data Acquired : 8/29/2014 4:13:52 PM  
 Data Processed : 11/3/2014 4:10:10 PM

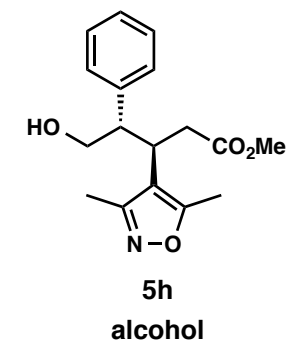

## &lt;Chromatogram&gt;

C:\LabSolutions\Data\Project1\jjj-5-107-a01.lcd

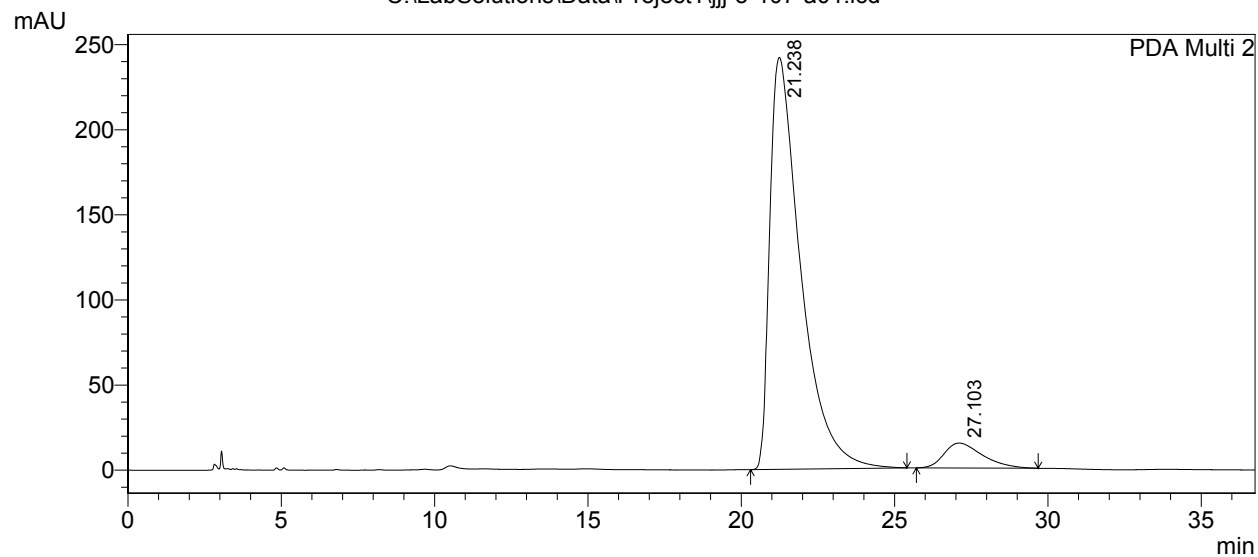

1 PDA Multi 2/215nm 4nm

PeakTable

PDA Ch2 215nm 4nm

| Peak# | Ret. Time | Area     | Height | Area %  | Height % |
|-------|-----------|----------|--------|---------|----------|
| 1     | 21.238    | 16940174 | 241991 | 93.005  | 94.294   |
| 2     | 27.103    | 1274041  | 14644  | 6.995   | 5.706    |
| Total |           | 18214214 | 256634 | 100.000 | 100.000  |

## ==== Shimadzu LCsolution Analysis Report ====

C:\LabSolutions\Data\Project1\jjj-5-092-a01.lcd

Acquired by : Admin  
 Sample Name : jjj-5-092-a  
 Sample ID : jjj-5-092-a  
 Vial # :  
 Injection Volume : 10 uL  
 Data File Name : jjj-5-092-a01.lcd  
 Method File Name : ATH-OD-J-analytical-hplc.lcm  
 Batch File Name :  
 Report File Name : Default.lcr  
 Data Acquired : 8/25/2014 9:14:31 AM  
 Data Processed : 8/25/2014 10:33:45 AM

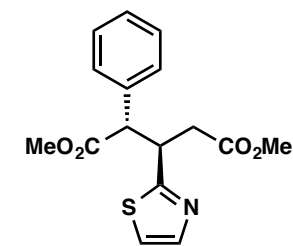

**5i**  
methyl ester

## &lt;Chromatogram&gt;

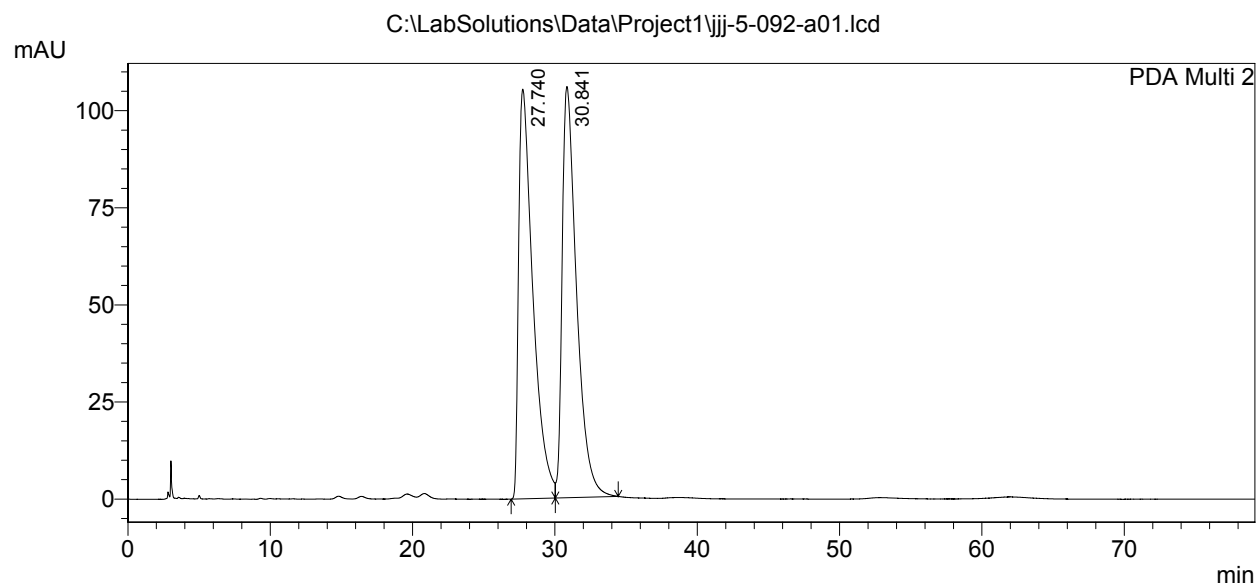

PeakTable

PDA Ch2 215nm 4nm

| Peak# | Ret. Time | Area     | Height | Area %  | Height % |
|-------|-----------|----------|--------|---------|----------|
| 1     | 27.740    | 7354240  | 105481 | 49.592  | 49.902   |
| 2     | 30.841    | 7475392  | 105894 | 50.408  | 50.098   |
| Total |           | 14829632 | 211375 | 100.000 | 100.000  |

## ==== Shimadzu LCsolution Analysis Report ====

C:\LabSolutions\Data\Project1\jjj-5-116-a01.lcd

Acquired by : Admin  
 Sample Name : jjj-5-116-a  
 Sample ID : jjj-5-116-a  
 Vial # :  
 Injection Volume : 10 uL  
 Data File Name : jjj-5-116-a01.lcd  
 Method File Name : ATH-OD-J-analytical-hplc.lcm  
 Batch File Name :  
 Report File Name : Default.lcr  
 Data Acquired : 9/5/2014 5:18:49 PM  
 Data Processed : 11/3/2014 4:11:24 PM

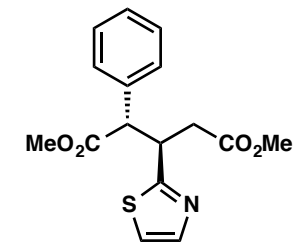

5i

methyl ester

## &lt;Chromatogram&gt;

C:\LabSolutions\Data\Project1\jjj-5-116-a01.lcd

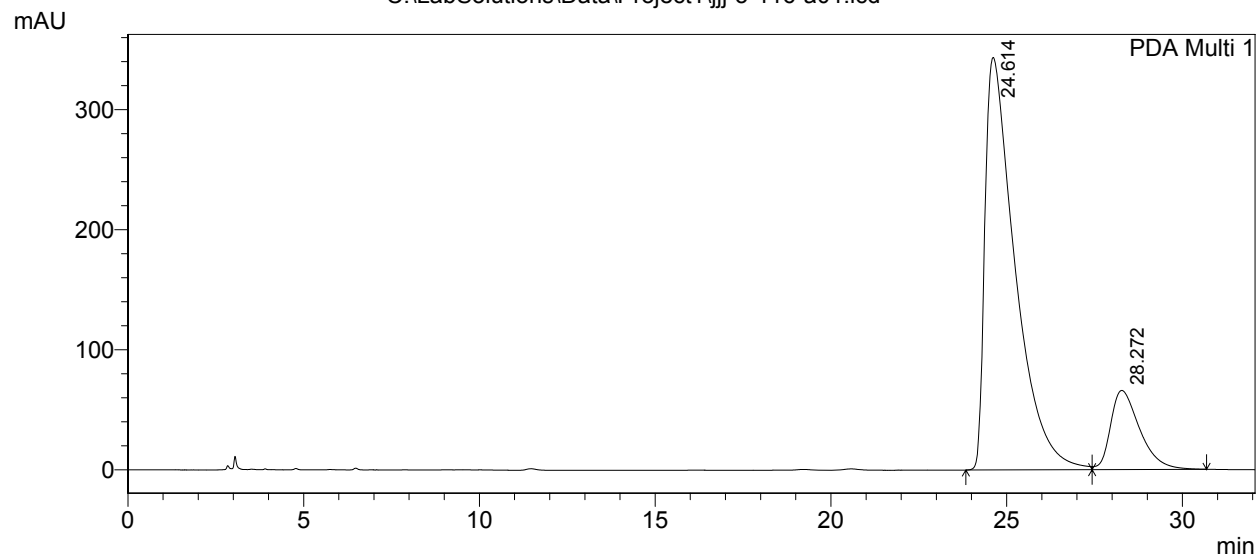

1 PDA Multi 1/215nm 4nm

PeakTable

PDA Ch1 215nm 4nm

| Peak# | Ret. Time | Area     | Height | Area %  | Height % |
|-------|-----------|----------|--------|---------|----------|
| 1     | 24.614    | 20444486 | 343598 | 84.316  | 83.911   |
| 2     | 28.272    | 3802862  | 65880  | 15.684  | 16.089   |
| Total |           | 24247348 | 409479 | 100.000 | 100.000  |

## ==== Shimadzu LCsolution Analysis Report ====

C:\LabSolutions\Data\Project1\PLu\PLu-05-9Me-c.lcd

Acquired by : Admin  
 Sample Name : PLu-05-9Me  
 Sample ID : PLu-05-9Me  
 Vial # :  
 Injection Volume : 10 uL  
 Data File Name : PLu-05-9Me-c.lcd  
 Method File Name : ATH-OD-J-analytical-hplc.lcm  
 Batch File Name :  
 Report File Name : Default.lcr  
 Data Acquired : 4/20/2014 2:07:11 PM  
 Data Processed : 4/20/2014 3:30:23 PM

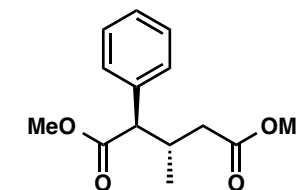

**5j**  
methyl ester

## &lt;Chromatogram&gt;

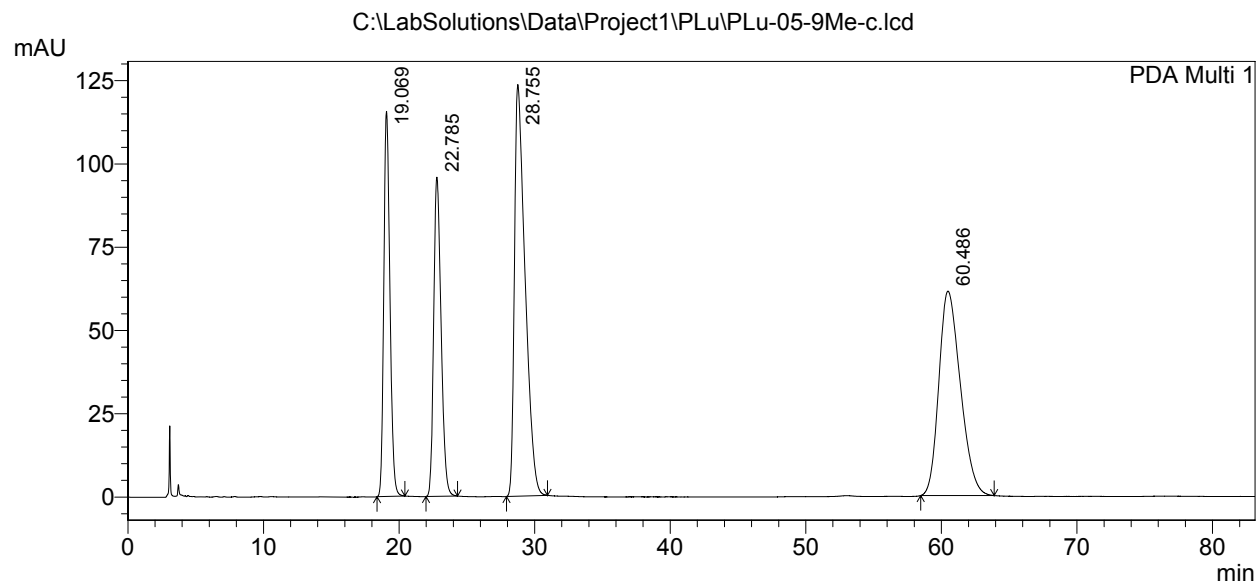

1 PDA Multi 1/215nm 4nm

PeakTable

PDA Ch1 215nm 4nm

| Peak# | Ret. Time | Area     | Height | Area %  | Height % |
|-------|-----------|----------|--------|---------|----------|
| 1     | 19.069    | 3619833  | 115637 | 17.437  | 29.171   |
| 2     | 22.785    | 3618619  | 95801  | 17.431  | 24.167   |
| 3     | 28.755    | 6758381  | 123600 | 32.555  | 31.180   |
| 4     | 60.486    | 6762800  | 61371  | 32.577  | 15.482   |
| Total |           | 20759634 | 396409 | 100.000 | 100.000  |

## ==== Shimadzu LCsolution Analysis Report ====

C:\LabSolutions\Data\Project1\PLu\PLu-05-55Me-a.lcd

Acquired by : Admin  
 Sample Name : PLu-05-55Me  
 Sample ID : PLu-05-55Me  
 Vial # :  
 Injection Volume : 10 uL  
 Data File Name : PLu-05-55Me-a.lcd  
 Method File Name : ATH-OD-J-analytical-hplc.lcm  
 Batch File Name :  
 Report File Name : Default.lcr  
 Data Acquired : 4/20/2014 3:34:28 PM  
 Data Processed : 4/20/2014 4:50:43 PM

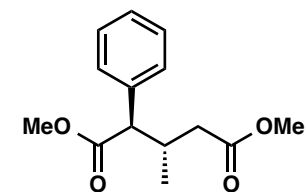

**5j**  
methyl ester

## &lt;Chromatogram&gt;

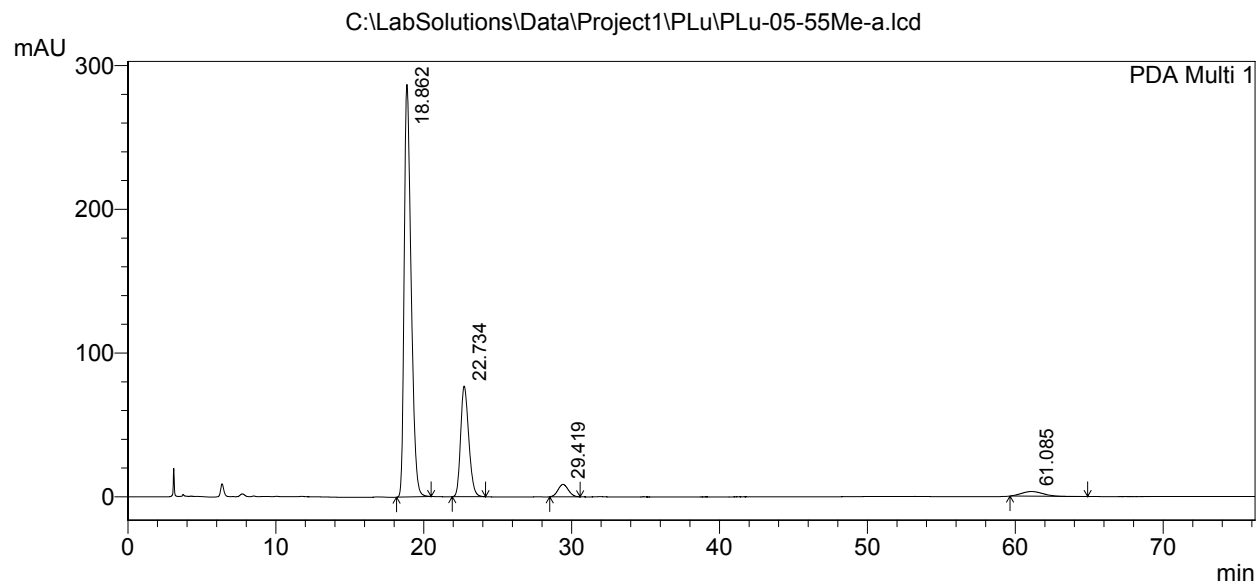

1 PDA Multi 1/215nm 4nm

PeakTable

PDA Ch1 215nm 4nm

| Peak# | Ret. Time | Area     | Height | Area %  | Height % |
|-------|-----------|----------|--------|---------|----------|
| 1     | 18.862    | 9330831  | 287018 | 71.760  | 76.369   |
| 2     | 22.734    | 2933770  | 76965  | 22.563  | 20.479   |
| 3     | 29.419    | 417480   | 8624   | 3.211   | 2.295    |
| 4     | 61.085    | 320711   | 3222   | 2.466   | 0.857    |
| Total |           | 13002792 | 375829 | 100.000 | 100.000  |

## ==== Shimadzu LCsolution Analysis Report ====

C:\LabSolutions\Data\Project1\PLu\PLu-05-104-Me-h.lcd

Acquired by : Admin  
 Sample Name : PLu-05-104-Me  
 Sample ID : PLu-05-104-Me  
 Vial # :  
 Injection Volume : 10 uL  
 Data File Name : PLu-05-104-Me-h.lcd  
 Method File Name : ATH-OD-J-analytical-hplc.lcm  
 Batch File Name :  
 Report File Name : Default.lcr  
 Data Acquired : 5/23/2014 3:08:15 PM  
 Data Processed : 5/23/2014 3:46:43 PM

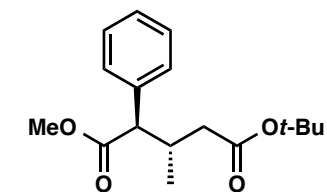

**5k**  
methyl ester

## &lt;Chromatogram&gt;

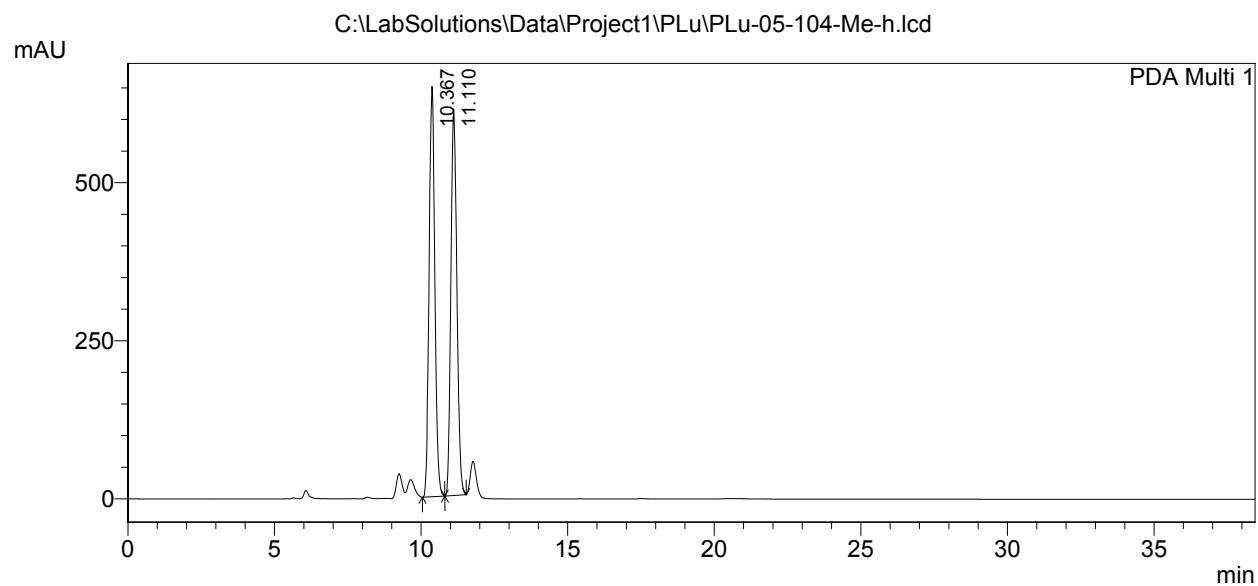

PeakTable

PDA Ch1 215nm 4nm

| Peak# | Ret. Time | Area     | Height  | Area %  | Height % |
|-------|-----------|----------|---------|---------|----------|
| 1     | 10.367    | 8843368  | 648961  | 50.357  | 51.512   |
| 2     | 11.110    | 8717836  | 610865  | 49.643  | 48.488   |
| Total |           | 17561204 | 1259826 | 100.000 | 100.000  |

## ==== Shimadzu LCsolution Analysis Report ====

C:\LabSolutions\Data\Project1\PLu\PLu-05-155-Me-aa.lcd

Acquired by : Admin  
 Sample Name : PLu-05-155-Me  
 Sample ID : PLu-05-155-Me  
 Vail # :  
 Injection Volume : 5 uL  
 Data File Name : PLu-05-155-Me-aa.lcd  
 Method File Name : ATH-OD-J-analytical-hplc.lcm  
 Batch File Name :  
 Report File Name : Default.lcr  
 Data Acquired : 7/14/2014 1:50:51 PM  
 Data Processed : 7/14/2014 5:29:30 PM

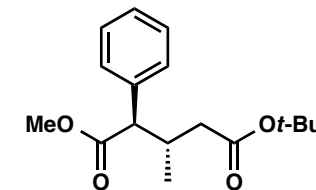

**5k**  
methyl ester

## &lt;Chromatogram&gt;

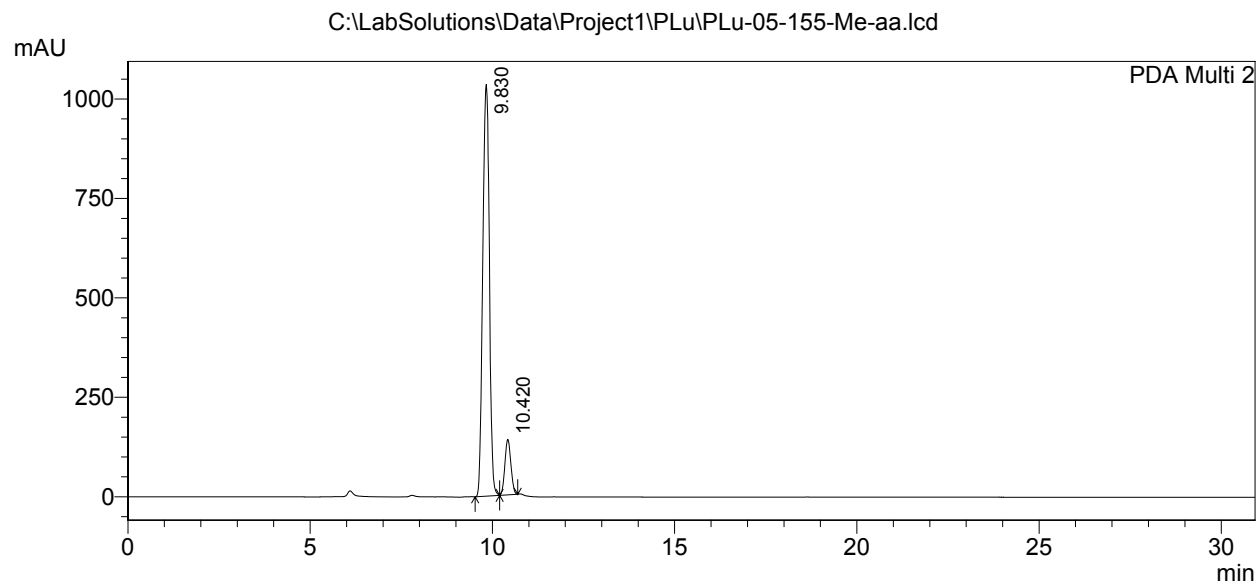

1 PDA Multi 2/215nm 4nm

PeakTable

PDA Ch2 215nm 4nm

| Peak# | Ret. Time | Area     | Height  | Area %  | Height % |
|-------|-----------|----------|---------|---------|----------|
| 1     | 9.830     | 12935327 | 1035300 | 89.069  | 88.126   |
| 2     | 10.420    | 1587507  | 139492  | 10.931  | 11.874   |
| Total |           | 14522834 | 1174792 | 100.000 | 100.000  |

## ==== Shimadzu LCsolution Analysis Report ====

C:\LabSolutions\Data\Project1\PLu\PLu-05-228-b.lcd

Acquired by : Admin  
 Sample Name : PLu-05-228  
 Sample ID : PLu-05-228  
 Vial # :  
 Injection Volume : 10 uL  
 Data File Name : PLu-05-228-b.lcd  
 Method File Name : ATH-OD-J-analytical-hplc.lcm  
 Batch File Name :  
 Report File Name : Default.lcr  
 Data Acquired : 8/29/2014 10:42:30 AM  
 Data Processed : 8/29/2014 11:07:24 AM

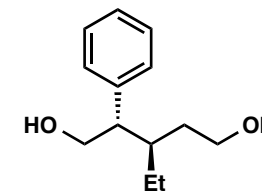

5I  
diol

## &lt;Chromatogram&gt;

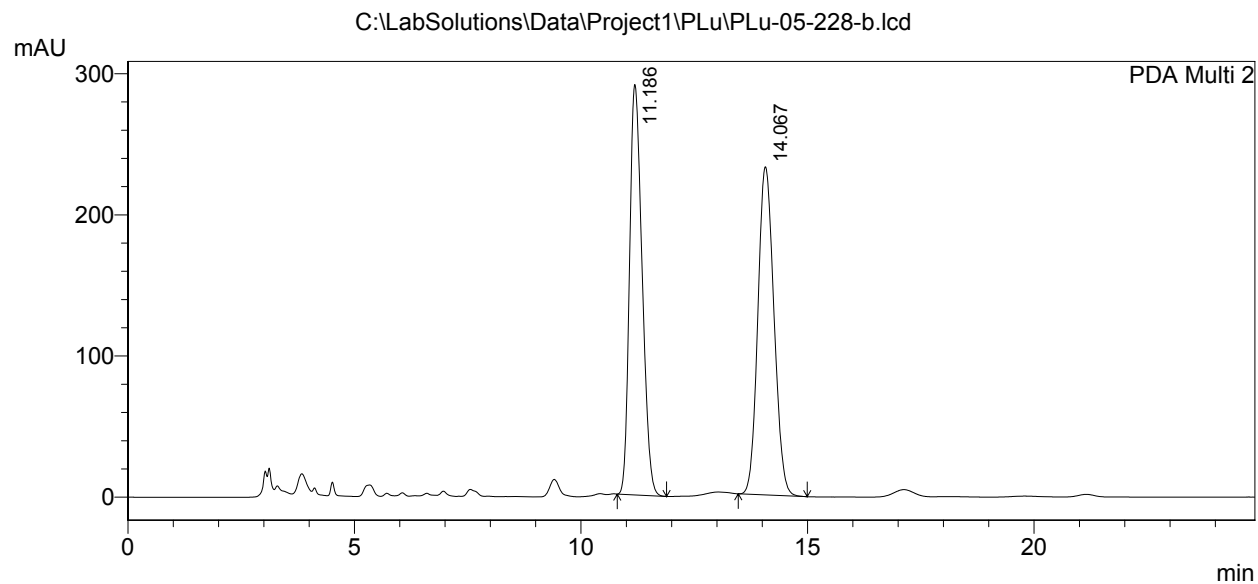

PeakTable

PDA Ch2 215nm 4nm

| Peak# | Ret. Time | Area     | Height | Area %  | Height % |
|-------|-----------|----------|--------|---------|----------|
| 1     | 11.186    | 5592472  | 290782 | 49.351  | 55.568   |
| 2     | 14.067    | 5739619  | 232509 | 50.649  | 44.432   |
| Total |           | 11332091 | 523291 | 100.000 | 100.000  |



## ==== Shimadzu LCsolution Analysis Report ====

C:\LabSolutions\Data\Project1\PLu\PLu-05-229-a.lcd

Acquired by : Admin  
 Sample Name : PLu-05-229  
 Sample ID : PLu-05-229  
 Vial # :  
 Injection Volume : 10 uL  
 Data File Name : PLu-05-229-a.lcd  
 Method File Name : ATH-OD-J-analytical-hplc.lcm  
 Batch File Name :  
 Report File Name : Default.lcr  
 Data Acquired : 9/2/2014 11:10:52 AM  
 Data Processed : 9/2/2014 11:40:52 AM

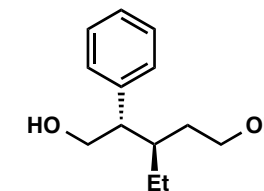5I  
diol

## &lt;Chromatogram&gt;

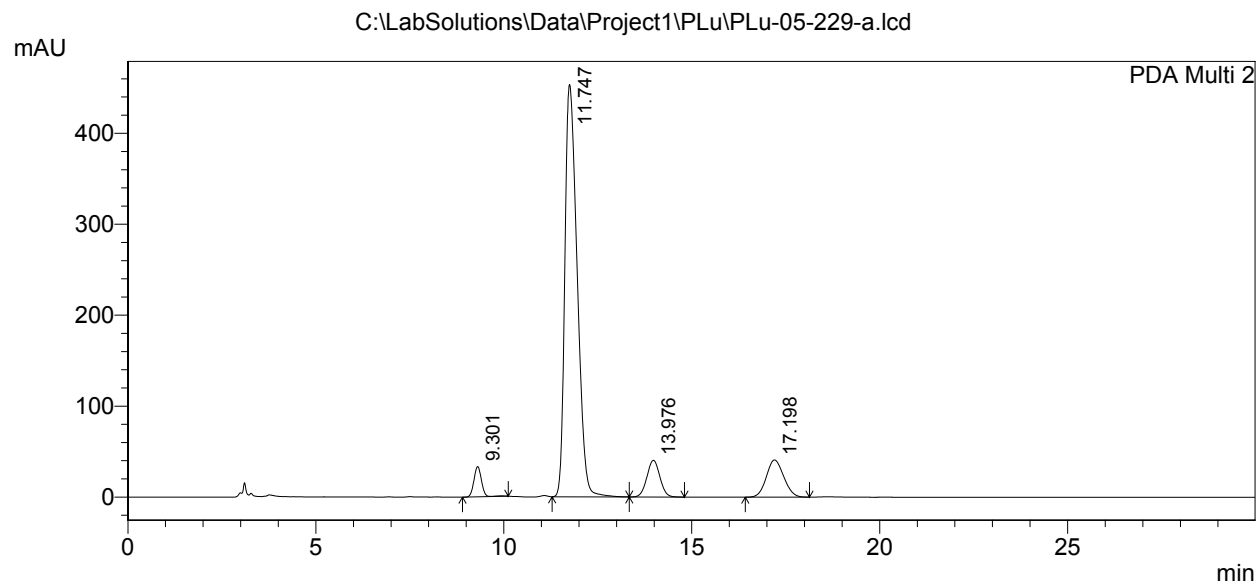

1 PDA Multi 2/215nm 4nm

PeakTable

PDA Ch2 215nm 4nm

| Peak# | Ret. Time | Area     | Height | Area %  | Height % |
|-------|-----------|----------|--------|---------|----------|
| 1     | 9.301     | 466571   | 33295  | 3.576   | 5.860    |
| 2     | 11.747    | 10290631 | 453524 | 78.878  | 79.819   |
| 3     | 13.976    | 970426   | 40441  | 7.438   | 7.118    |
| 4     | 17.198    | 1318644  | 40930  | 10.107  | 7.204    |
| Total |           | 13046273 | 568191 | 100.000 | 100.000  |

## ==== Shimadzu LCsolution Analysis Report ====

C:\LabSolutions\Data\Project1\PLu\PLu-05-136-Me-g.lcd

Acquired by : Admin  
 Sample Name : PLu-05-136-Me  
 Sample ID : PLu-05-136-Me  
 Vial # :  
 Injection Volume : 10 uL  
 Data File Name : PLu-05-136-Me-g.lcd  
 Method File Name : ATH-OD-J-analytical-hplc.lcm  
 Batch File Name :  
 Report File Name : Default.lcr  
 Data Acquired : 6/17/2014 2:48:35 PM  
 Data Processed : 6/17/2014 3:39:16 PM

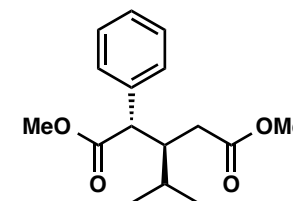

**5m**  
methyl ester

## &lt;Chromatogram&gt;

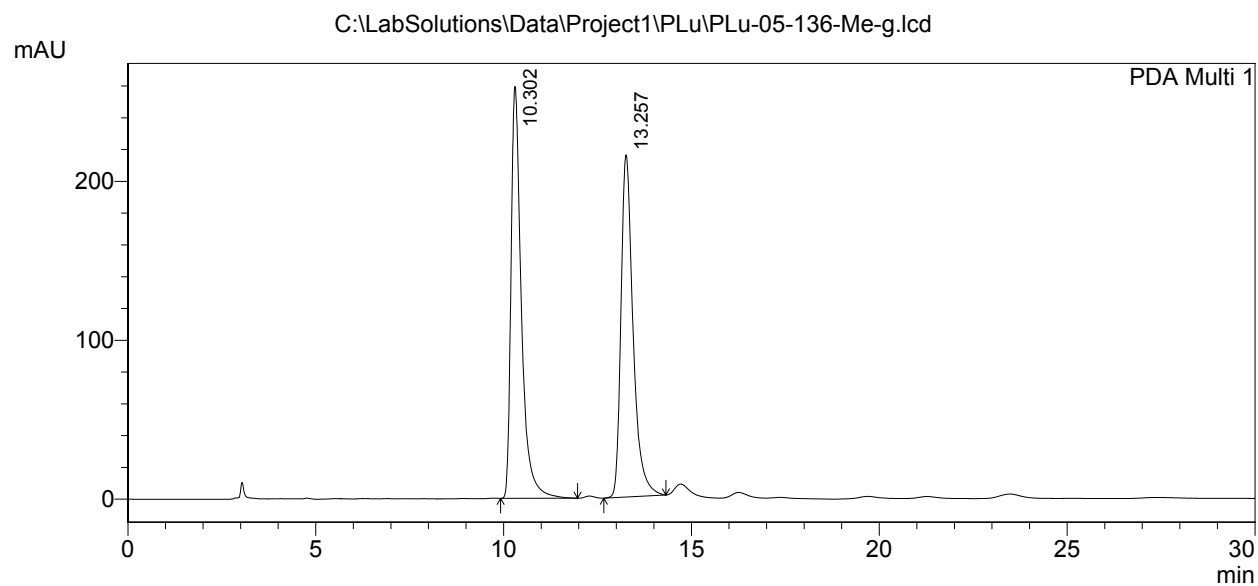

1 PDA Multi 1/215nm 4nm

PeakTable

PDA Ch1 215nm 4nm

| Peak# | Ret. Time | Area    | Height | Area %  | Height % |
|-------|-----------|---------|--------|---------|----------|
| 1     | 10.302    | 4950742 | 259193 | 50.791  | 54.620   |
| 2     | 13.257    | 4796524 | 215343 | 49.209  | 45.380   |
| Total |           | 9747266 | 474536 | 100.000 | 100.000  |

## ==== Shimadzu LCsolution Analysis Report ====

C:\LabSolutions\Data\Project1\PLu\PLu-05-137-Me-g.lcd

Acquired by : Admin  
 Sample Name : PLu-05-137-Me  
 Sample ID : PLu-05-137-Me  
 Vial # :  
 Injection Volume : 10 uL  
 Data File Name : PLu-05-137-Me-g.lcd  
 Method File Name : ATH-OD-J-analytical-hplc.lcm  
 Batch File Name :  
 Report File Name : Default.lcr  
 Data Acquired : 6/17/2014 3:41:01 PM  
 Data Processed : 6/17/2014 4:10:32 PM

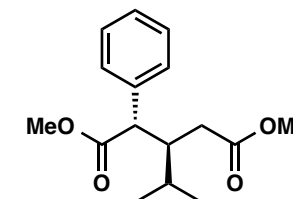

**5m**  
methyl ester

## &lt;Chromatogram&gt;

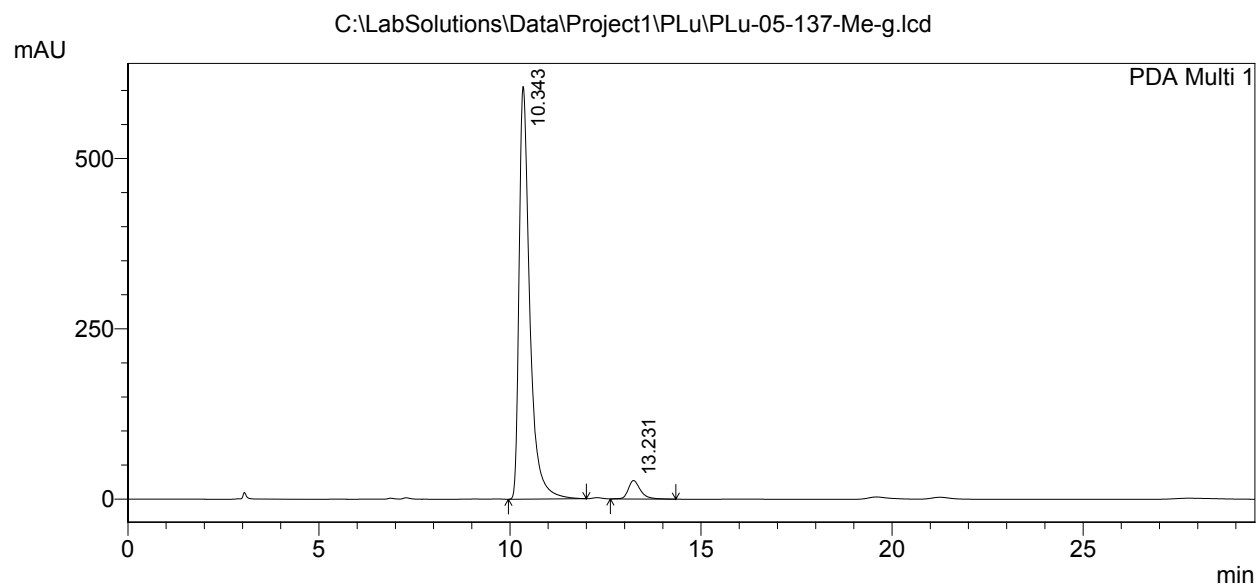

1 PDA Multi 1/215nm 4nm

PeakTable

PDA Ch1 215nm 4nm

| Peak# | Ret. Time | Area     | Height | Area %  | Height % |
|-------|-----------|----------|--------|---------|----------|
| 1     | 10.343    | 11734879 | 605961 | 95.108  | 95.713   |
| 2     | 13.231    | 603594   | 27144  | 4.892   | 4.287    |
| Total |           | 12338473 | 633105 | 100.000 | 100.000  |

## ==== Shimadzu LCsolution Analysis Report ====

C:\LabSolutions\Data\Project1\PLu\PLu-05-131Me-a.lcd.lcd  
 Acquired by : Admin  
 Sample Name : PLu-05-131Me  
 Sample ID : PLu-05-131Me  
 Vail # :  
 Injection Volume : 10 uL  
 Data File Name : PLu-05-131Me-a.lcd.lcd  
 Method File Name : ATH-OD-J-analytical-hplc.lcm  
 Batch File Name :  
 Report File Name : Default.lcr  
 Data Acquired : 6/11/2014 1:40:54 PM  
 Data Processed : 6/11/2014 2:07:40 PM

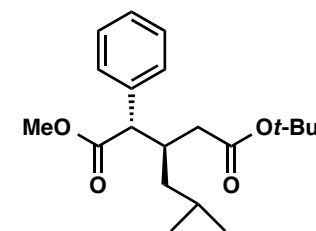

**5n**  
methyl ester

## &lt;Chromatogram&gt;

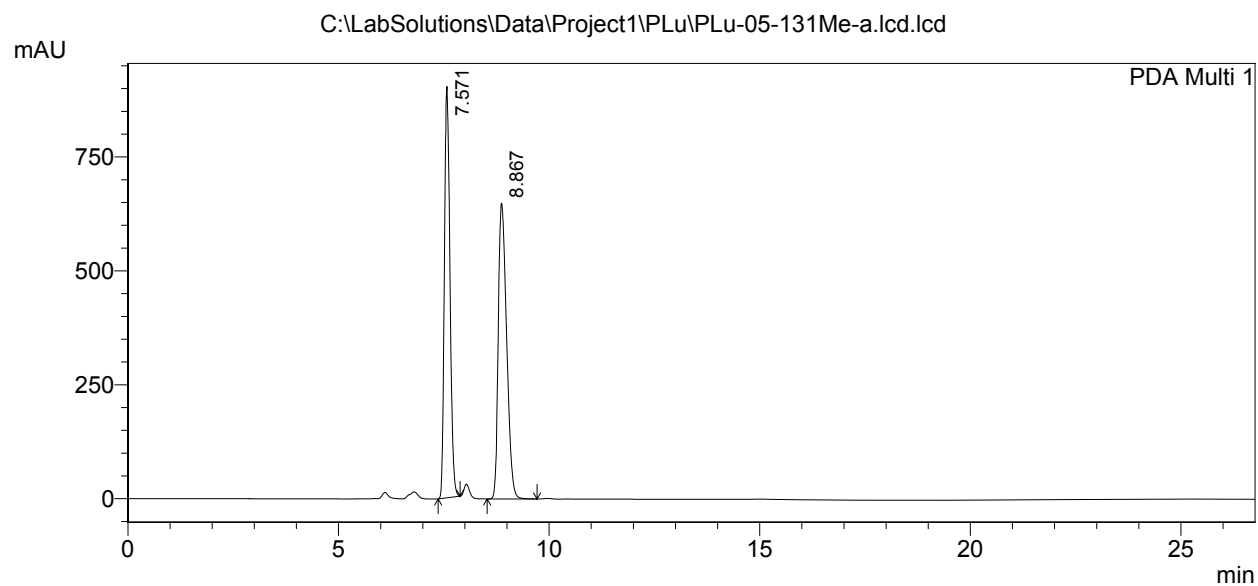

PeakTable

PDA Ch1 215nm 4nm

| Peak# | Ret. Time | Area     | Height  | Area %  | Height % |
|-------|-----------|----------|---------|---------|----------|
| 1     | 7.571     | 8320303  | 902814  | 48.172  | 58.170   |
| 2     | 8.867     | 8951858  | 649222  | 51.828  | 41.830   |
| Total |           | 17272161 | 1552036 | 100.000 | 100.000  |

## ==== Shimadzu LCsolution Analysis Report ====

C:\LabSolutions\Data\Project1\PLu\PLu-05-142-Me-a.lcd

Acquired by : Admin  
 Sample Name : PLu-05-142-Me  
 Sample ID : PLu-05-142-Me  
 Vial # :  
 Injection Volume : 10 uL  
 Data File Name : PLu-05-142-Me-a.lcd  
 Method File Name : ATH-OD-J-analytical-hplc.lcm  
 Batch File Name :  
 Report File Name : Default.lcr  
 Data Acquired : 6/23/2014 2:46:39 PM  
 Data Processed : 6/23/2014 3:18:55 PM

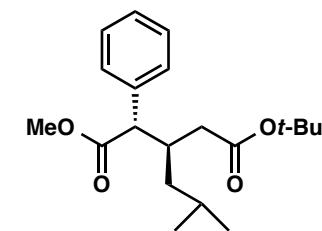

**5n**  
methyl ester

## &lt;Chromatogram&gt;

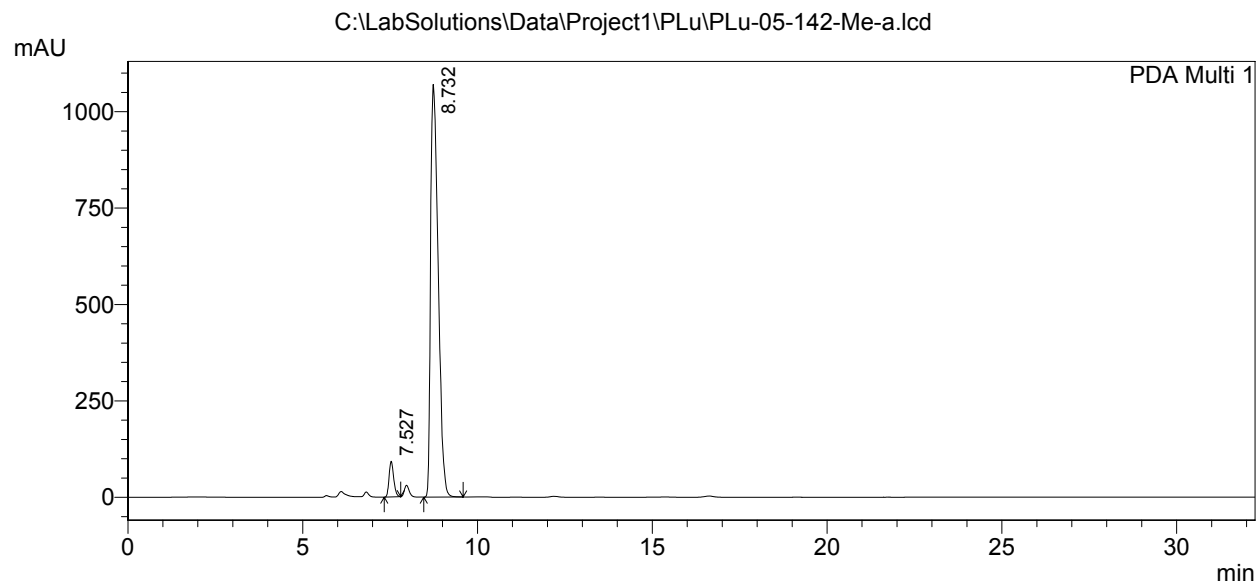

1 PDA Multi 1/215nm 4nm

PeakTable

PDA Ch1 215nm 4nm

| Peak# | Ret. Time | Area     | Height  | Area %  | Height % |
|-------|-----------|----------|---------|---------|----------|
| 1     | 7.527     | 851620   | 92497   | 5.002   | 7.955    |
| 2     | 8.732     | 16173043 | 1070194 | 94.998  | 92.045   |
| Total |           | 17024663 | 1162691 | 100.000 | 100.000  |

## ==== Shimadzu LCsolution Analysis Report ====

C:\LabSolutions\Data\Project1\PLu\PLu-05-197-cc.lcd

Acquired by : Admin  
Sample Name : PLu-05-197  
Sample ID : PLu-05-197  
Vial # :  
Injection Volume : 20 uL  
Data File Name : PLu-05-197-cc.lcd  
Method File Name : ATH-OD-J-analytical-hplc.lcm  
Batch File Name :  
Report File Name : Default.lcr  
Data Acquired : 8/7/2014 5:44:51 PM  
Data Processed : 8/7/2014 6:14:25 PM

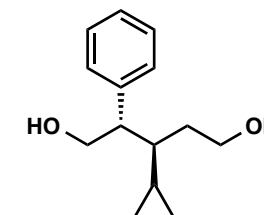**5o**  
**diol**

## &lt;Chromatogram&gt;

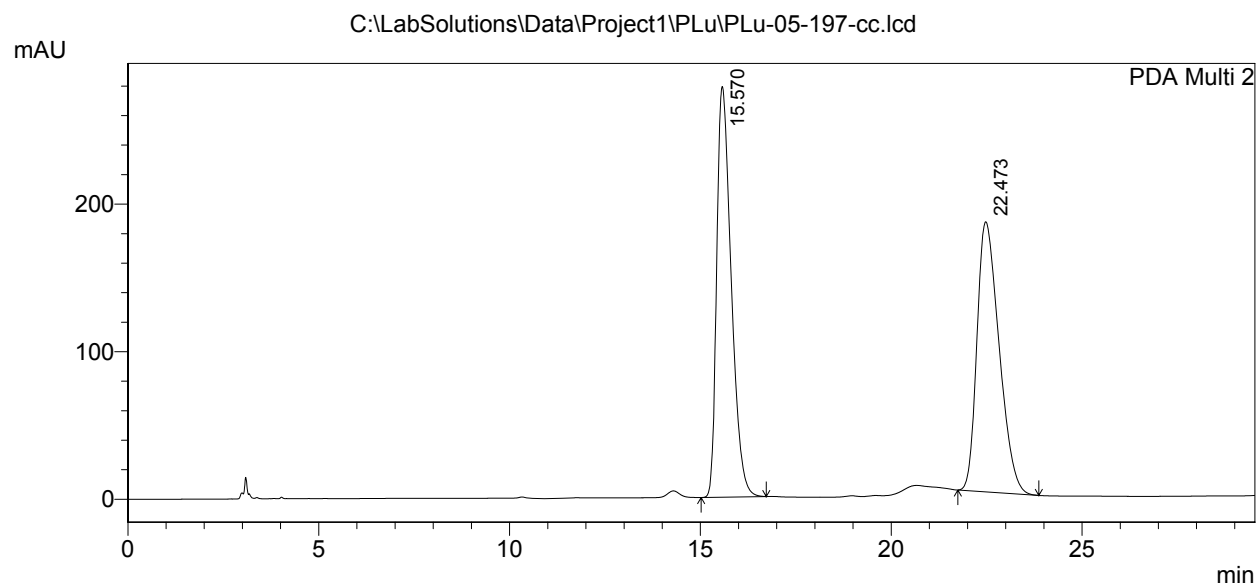

1 PDA Multi 2/215nm 4nm

PeakTable

PDA Ch2 215nm 4nm

| Peak# | Ret. Time | Area     | Height | Area %  | Height % |
|-------|-----------|----------|--------|---------|----------|
| 1     | 15.570    | 7341650  | 278382 | 49.915  | 60.328   |
| 2     | 22.473    | 7366742  | 183069 | 50.085  | 39.672   |
| Total |           | 14708393 | 461451 | 100.000 | 100.000  |

## ==== Shimadzu LCsolution Analysis Report ====

C:\LabSolutions\Data\Project1\PLu\PLu-05-201-blcd.lcd

Acquired by : Admin  
 Sample Name : PLu-05-201  
 Sample ID : PLu-05-201  
 Vial # :  
 Injection Volume : 20 uL  
 Data File Name : PLu-05-201-blcd.lcd  
 Method File Name : ATH-OD-J-analytical-hplc.lcm  
 Batch File Name :  
 Report File Name : Default.lcr  
 Data Acquired : 8/7/2014 4:52:59 PM  
 Data Processed : 8/7/2014 5:42:58 PM

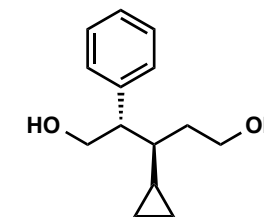

**5o**  
diol

## &lt;Chromatogram&gt;

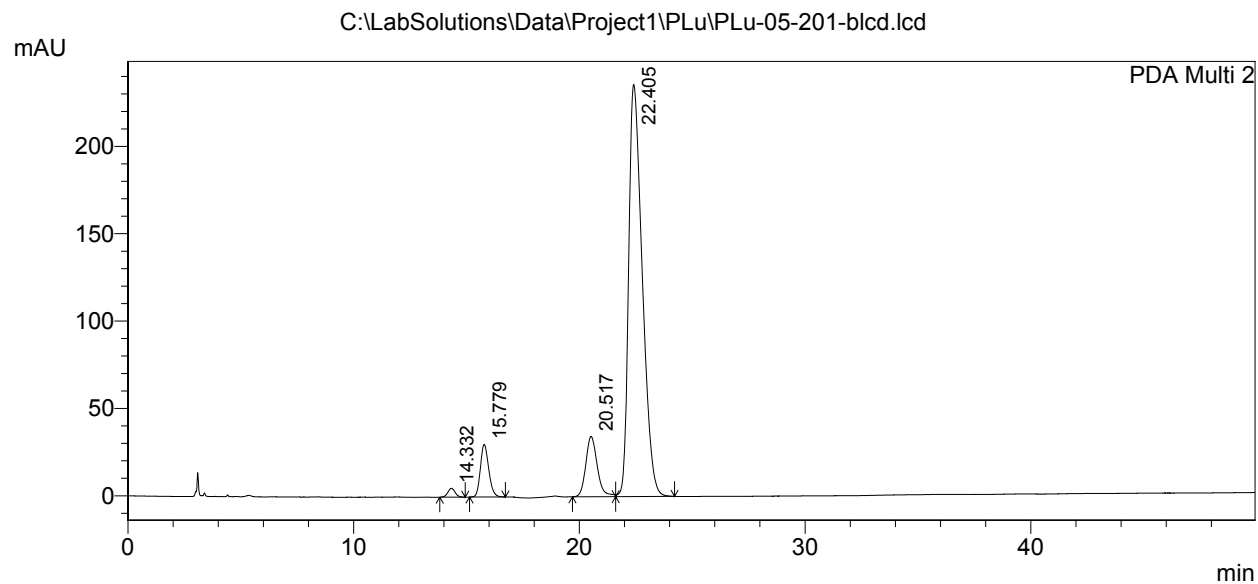

1 PDA Multi 2/215nm 4nm

PeakTable

PDA Ch2 215nm 4nm

| Peak# | Ret. Time | Area     | Height | Area %  | Height % |
|-------|-----------|----------|--------|---------|----------|
| 1     | 14.332    | 115213   | 5115   | 0.963   | 1.674    |
| 2     | 15.779    | 773262   | 30126  | 6.460   | 9.858    |
| 3     | 20.517    | 1217608  | 34469  | 10.173  | 11.279   |
| 4     | 22.405    | 9863297  | 235890 | 82.404  | 77.189   |
| Total |           | 11969381 | 305599 | 100.000 | 100.000  |

## ==== Shimadzu LCsolution Analysis Report ====

C:\LabSolutions\Data\Project1\PLu\PLu-05-217-Me-b.lcd

Acquired by : Admin  
 Sample Name : PLu-05-217-Me  
 Sample ID : PLu-05-217-Me  
 Vail # :  
 Injection Volume : 10 uL  
 Data File Name : PLu-05-217-Me-b.lcd  
 Method File Name : ATH-OD-J-analytical-hplc.lcm  
 Batch File Name :  
 Report File Name : Default.lcr  
 Data Acquired : 8/20/2014 11:57:53 AM  
 Data Processed : 8/20/2014 1:15:14 PM

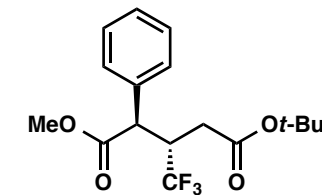

**5p**  
methyl ester

## &lt;Chromatogram&gt;

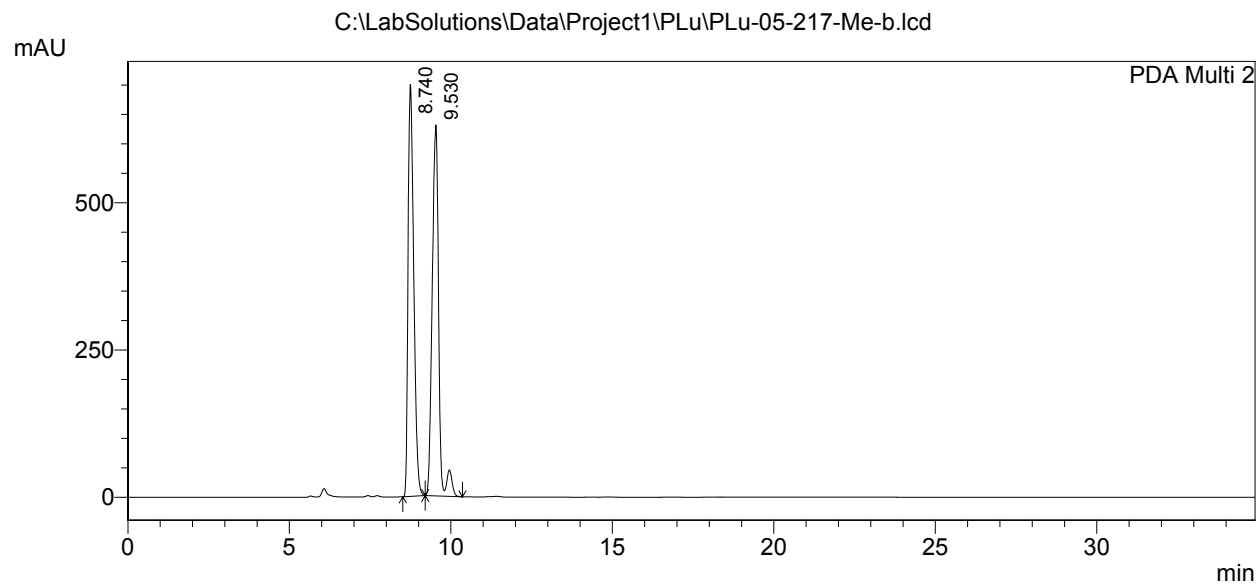

PeakTable

PDA Ch2 215nm 4nm

| Peak# | Ret. Time | Area     | Height  | Area %  | Height % |
|-------|-----------|----------|---------|---------|----------|
| 1     | 8.740     | 8583740  | 699512  | 49.386  | 52.623   |
| 2     | 9.530     | 8797193  | 629783  | 50.614  | 47.377   |
| Total |           | 17380933 | 1329295 | 100.000 | 100.000  |



## ==== Shimadzu LCsolution Analysis Report ====

C:\LabSolutions\Data\Project1\PLu\PLu-05-218-03.lcd

Acquired by : Admin  
 Sample Name : PLu-05-218  
 Sample ID : PLu-05-218  
 Vial # :  
 Injection Volume : 10 uL  
 Data File Name : PLu-05-218-03.lcd  
 Method File Name : ATH-OD-J-analytical-hplc.lcm  
 Batch File Name :  
 Report File Name : Default.lcr  
 Data Acquired : 8/25/2014 3:56:10 PM  
 Data Processed : 8/25/2014 4:19:26 PM

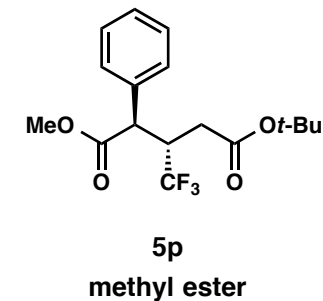

## &lt;Chromatogram&gt;

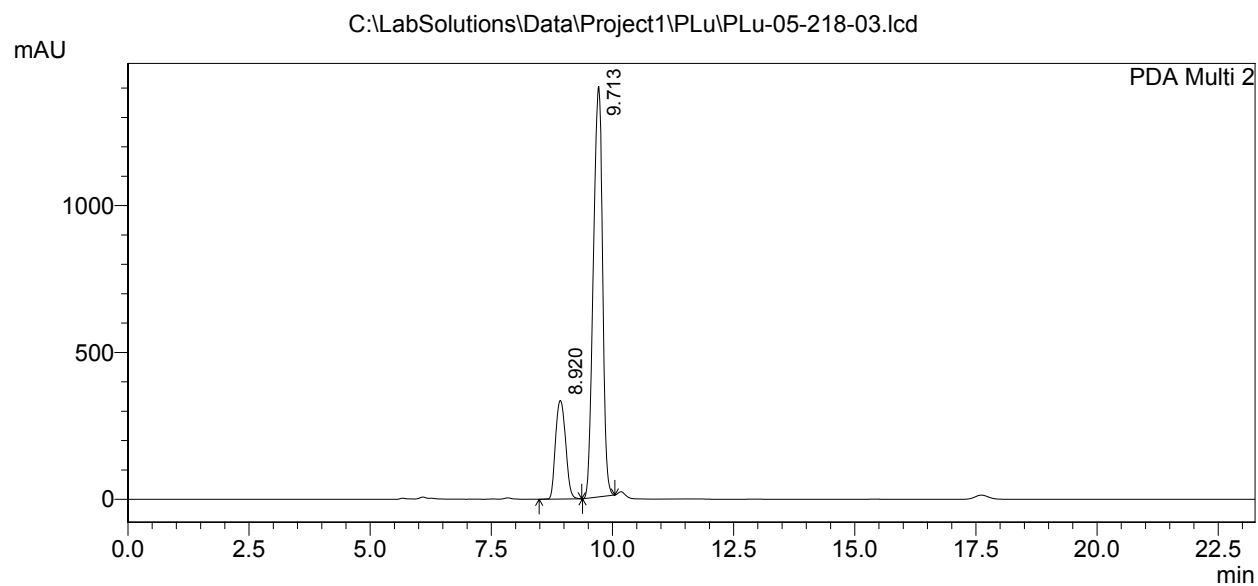

1 PDA Multi 2/215nm 4nm

PeakTable

PDA Ch2 215nm 4nm

| Peak# | Ret. Time | Area     | Height  | Area %  | Height % |
|-------|-----------|----------|---------|---------|----------|
| 1     | 8.920     | 4854231  | 335687  | 20.840  | 19.369   |
| 2     | 9.713     | 18438530 | 1397420 | 79.160  | 80.631   |
| Total |           | 23292760 | 1733106 | 100.000 | 100.000  |

## ==== Shimadzu LCsolution Analysis Report ====

C:\LabSolutions\Data\Project1\PLu\PLu-05-152-Me-c.lcd

Acquired by : Admin  
 Sample Name : PLu-05-152-Me  
 Sample ID : PLu-05-152-Me  
 Vail # :  
 Injection Volume : 10 uL  
 Data File Name : PLu-05-152-Me-c.lcd  
 Method File Name : ATH-OD-J-analytical-hplc.lcm  
 Batch File Name :  
 Report File Name : Default.lcr  
 Data Acquired : 7/5/2014 11:43:37 AM  
 Data Processed : 9/4/2014 11:50:40 AM

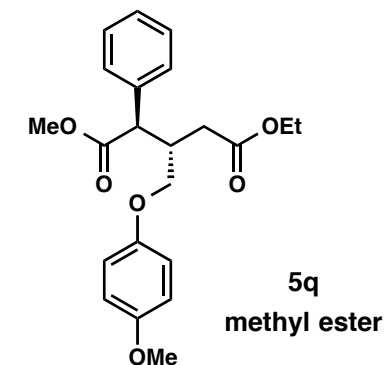

## &lt;Chromatogram&gt;

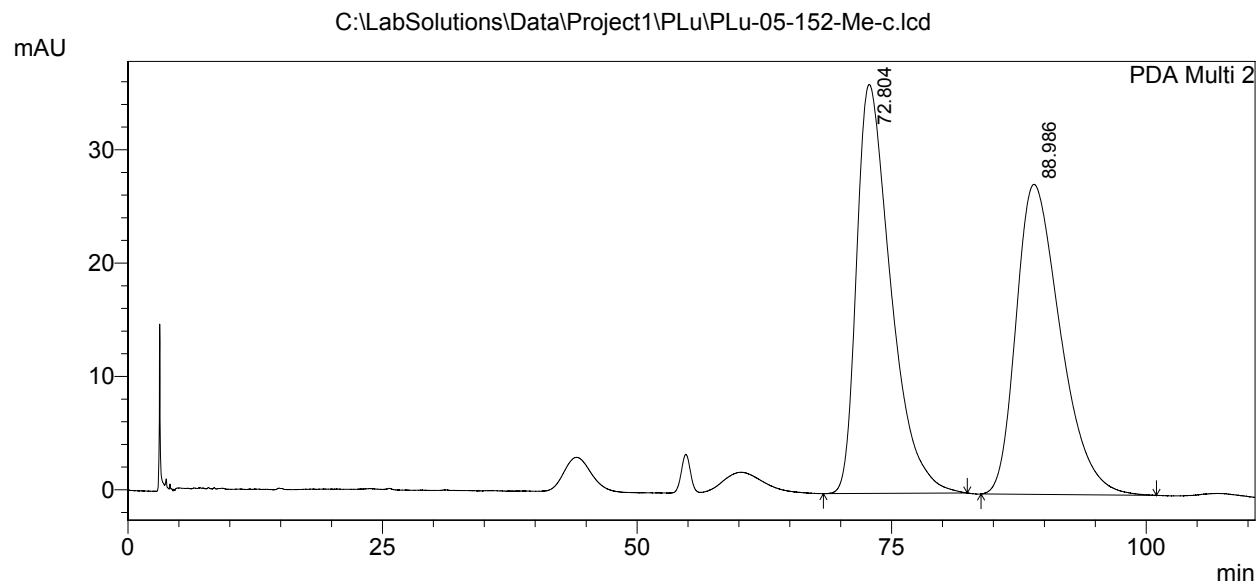

1 PDA Multi 2/215nm 4nm

PeakTable

PDA Ch2 215nm 4nm

| Peak# | Ret. Time | Area     | Height | Area %  | Height % |
|-------|-----------|----------|--------|---------|----------|
| 1     | 72.804    | 8427327  | 36087  | 50.435  | 56.881   |
| 2     | 88.986    | 8282036  | 27356  | 49.565  | 43.119   |
| Total |           | 16709364 | 63443  | 100.000 | 100.000  |

## ==== Shimadzu LCsolution Analysis Report ====

C:\LabSolutions\Data\Project1\PLu\PLu-05-230-Me-b.lcd

Acquired by : Admin  
 Sample Name : PLu-05-230-Me  
 Sample ID : PLu-05-230-Me  
 Vial # :  
 Injection Volume : 10 uL  
 Data File Name : PLu-05-230-Me-b.lcd  
 Method File Name : ATH-OD-J-analytical-hplc.lcm  
 Batch File Name :  
 Report File Name : Default.lcr  
 Data Acquired : 9/4/2014 3:00:45 PM  
 Data Processed : 11/17/2014 2:52:44 PM

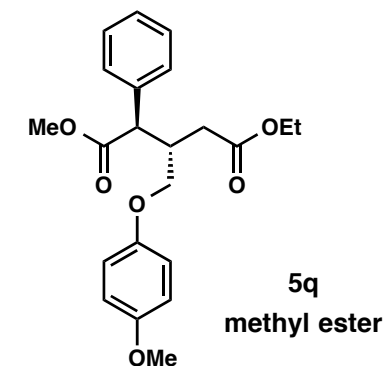

## &lt;Chromatogram&gt;

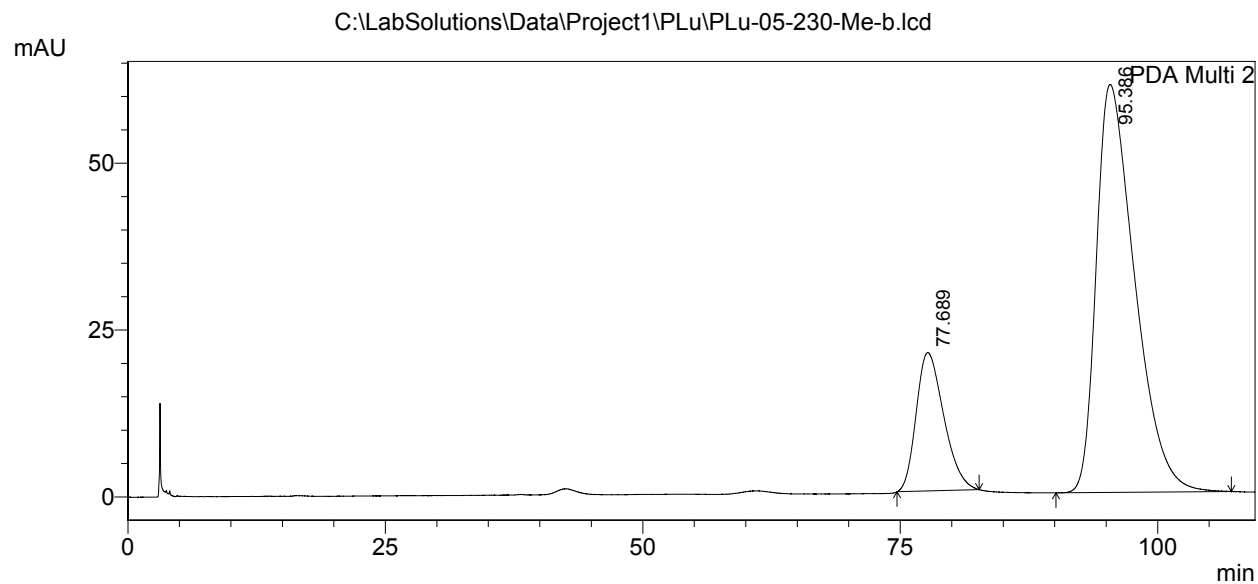

PDA Ch2 215nm 4nm

PeakTable

| Peak# | Ret. Time | Area     | Height | Area %  | Height % |
|-------|-----------|----------|--------|---------|----------|
| 1     | 77.689    | 3864028  | 20735  | 19.606  | 25.329   |
| 2     | 95.386    | 15844264 | 61128  | 80.394  | 74.671   |
| Total |           | 19708292 | 81864  | 100.000 | 100.000  |

## ==== Shimadzu LCsolution Analysis Report ====

C:\LabSolutions\Data\Project1\je2-167-colmB.lcd

Acquired by : Admin  
Sample Name : je2-167-colmB  
Sample ID : je2-167-colmB  
Vial # :  
Injection Volume : 10 uL  
Data File Name : je2-167-colmB.lcd  
Method File Name : ATH-OD-J-analytical-hplc.lcm  
Batch File Name :  
Report File Name : Default.lcr  
Data Acquired : 7/15/2014 10:15:53 AM  
Data Processed : 7/15/2014 11:26:46 AM

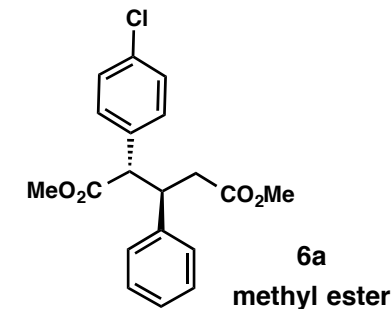

## &lt;Chromatogram&gt;

C:\LabSolutions\Data\Project1\je2-167-colmB.lcd

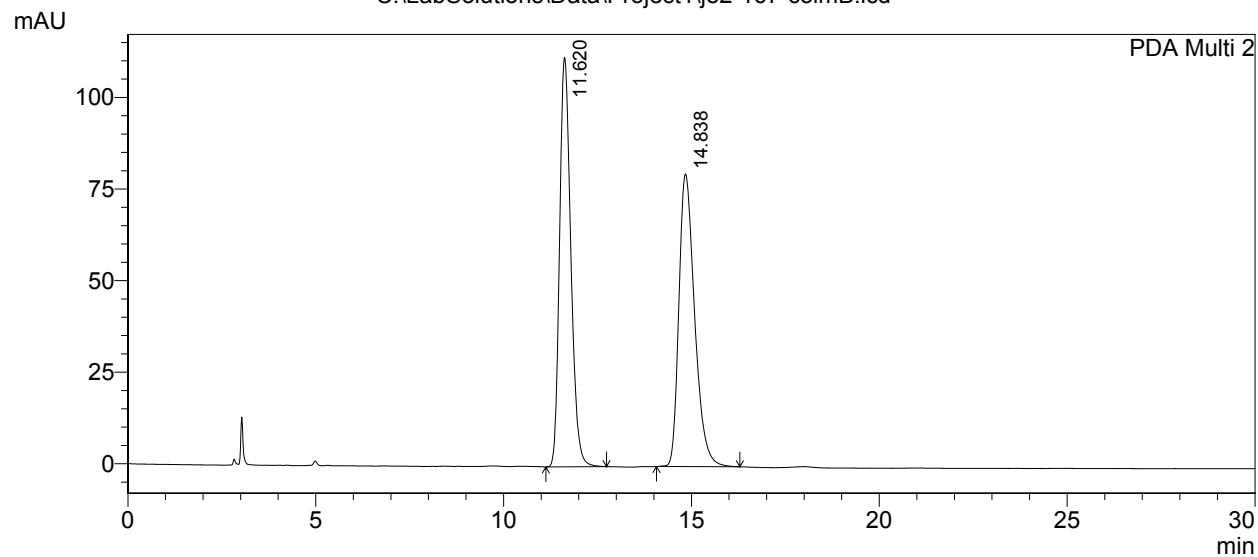

1 PDA Multi 2/215nm 4nm

PeakTable

PDA Ch2 215nm 4nm

| Peak# | Ret. Time | Area    | Height | Area %  | Height % |
|-------|-----------|---------|--------|---------|----------|
| 1     | 11.620    | 2322689 | 111759 | 49.969  | 58.316   |
| 2     | 14.838    | 2325606 | 79884  | 50.031  | 41.684   |
| Total |           | 4648295 | 191643 | 100.000 | 100.000  |

## ==== Shimadzu LCsolution Analysis Report ====

C:\LabSolutions\Data\Project1\je2-173-plug001.lcd

Acquired by : Admin  
Sample Name : je2-173-plug  
Sample ID : je2-173-plug  
Vial # :  
Injection Volume : 10 uL  
Data File Name : je2-173-plug001.lcd  
Method File Name : ATH-OD-J-analytical-hplc.lcm  
Batch File Name :  
Report File Name : Default.lcr  
Data Acquired : 7/20/2014 8:18:26 PM  
Data Processed : 7/20/2014 10:14:43 PM

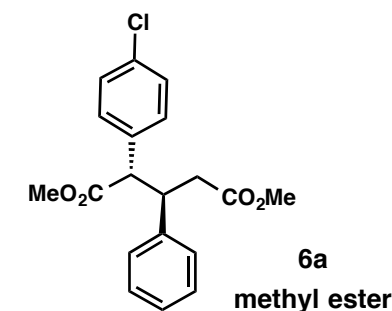

## &lt;Chromatogram&gt;

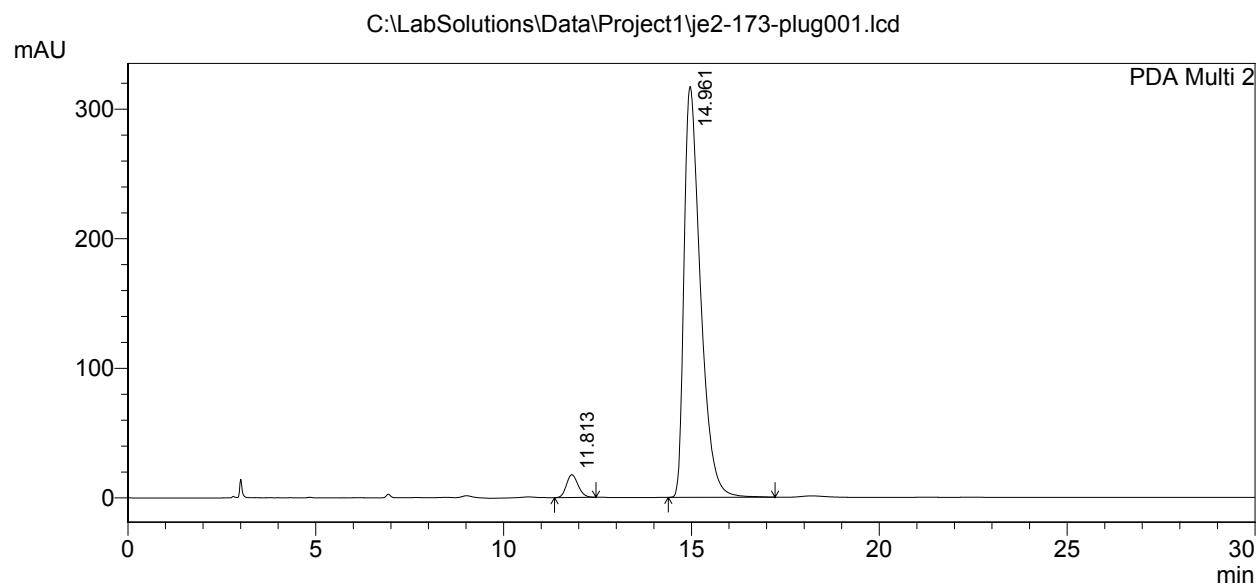

1 PDA Multi 2/215nm 4nm

PeakTable

PDA Ch2 215nm 4nm

| Peak# | Ret. Time | Area     | Height | Area %  | Height % |
|-------|-----------|----------|--------|---------|----------|
| 1     | 11.813    | 380351   | 17574  | 3.800   | 5.251    |
| 2     | 14.961    | 9629562  | 317082 | 96.200  | 94.749   |
| Total |           | 10009912 | 334656 | 100.000 | 100.000  |

## ==== Shimadzu LCsolution Analysis Report ====

C:\LabSolutions\Data\Project1\je-2-227-01.lcd

Acquired by : Admin  
 Sample Name : je-2-227  
 Sample ID : je-2-227  
 Vial # :  
 Injection Volume : 10 uL  
 Data File Name : je-2-227-01.lcd  
 Method File Name : ATH-OD-J-analytical-hplc.lcm  
 Batch File Name :  
 Report File Name : Default.lcr  
 Data Acquired : 11/19/2014 10:31:32 AM  
 Data Processed : 11/19/2014 11:12:30 AM

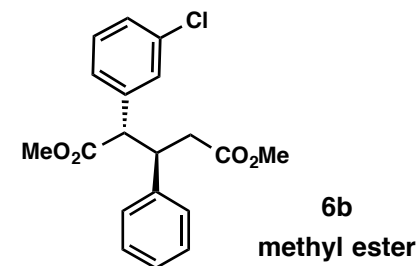

## &lt;Chromatogram&gt;

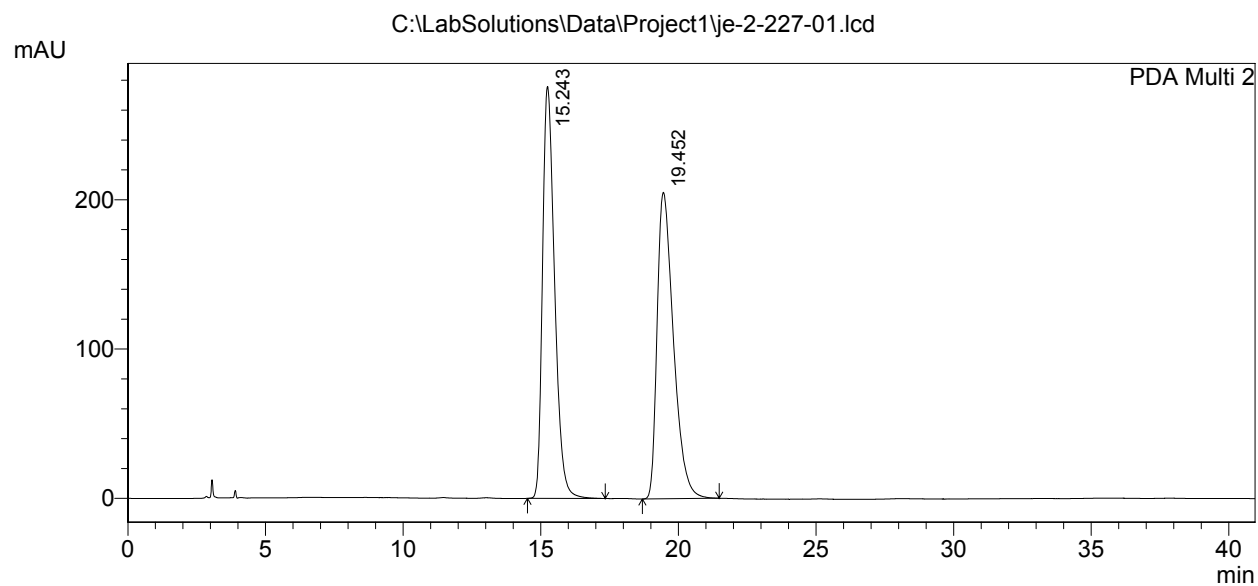

1 PDA Multi 2/215nm 4nm

PeakTable

PDA Ch2 215nm 4nm

| Peak# | Ret. Time | Area     | Height | Area %  | Height % |
|-------|-----------|----------|--------|---------|----------|
| 1     | 15.243    | 8417846  | 275903 | 49.908  | 57.344   |
| 2     | 19.452    | 8448715  | 205232 | 50.092  | 42.656   |
| Total |           | 16866561 | 481135 | 100.000 | 100.000  |

## ==== Shimadzu LCsolution Analysis Report ====

C:\LabSolutions\Data\Project1\je2-184-plug01.lcd

Acquired by : Admin  
 Sample Name : je2-184-plug  
 Sample ID : je2-184-plug  
 Vial # :  
 Injection Volume : 20 uL  
 Data File Name : je2-184-plug01.lcd  
 Method File Name : ATH-OD-J-analytical-hplc.lcm  
 Batch File Name :  
 Report File Name : Default.lcr  
 Data Acquired : 8/8/2014 4:09:44 PM  
 Data Processed : 8/8/2014 5:15:38 PM

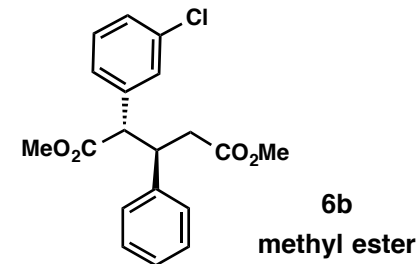

## &lt;Chromatogram&gt;

C:\LabSolutions\Data\Project1\je2-184-plug01.lcd

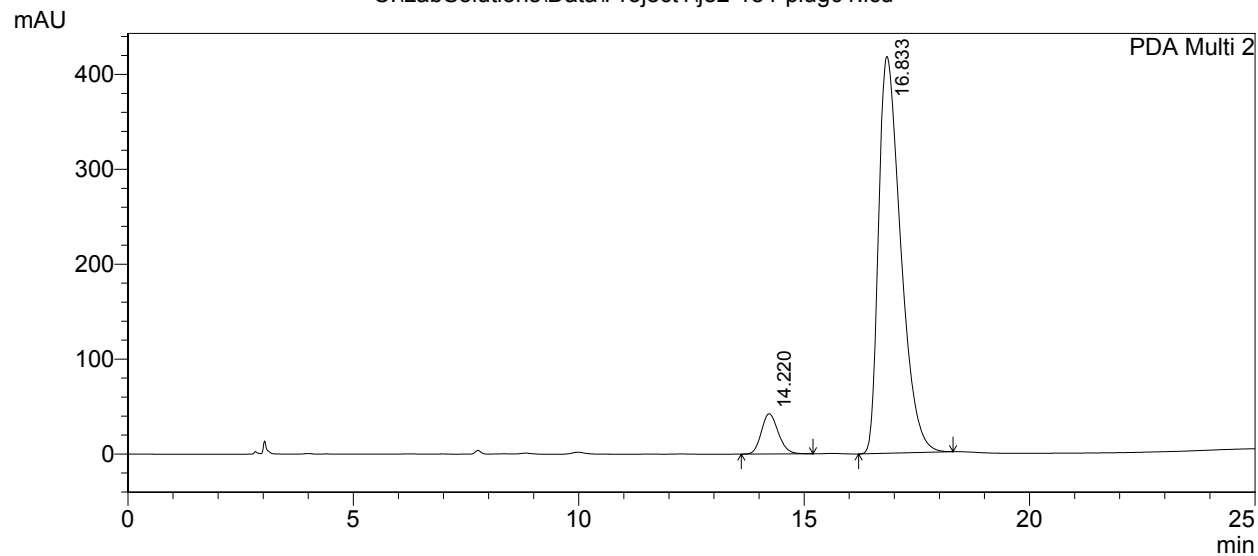

1 PDA Multi 2/215nm 4nm

PeakTable

PDA Ch2 215nm 4nm

| Peak# | Ret. Time | Area     | Height | Area %  | Height % |
|-------|-----------|----------|--------|---------|----------|
| 1     | 14.220    | 1108241  | 42468  | 7.196   | 9.219    |
| 2     | 16.833    | 14292751 | 418177 | 92.804  | 90.781   |
| Total |           | 15400992 | 460645 | 100.000 | 100.000  |

## ==== Shimadzu LCsolution Analysis Report ====

C:\LabSolutions\Data\Project1\je2-172-colm01.lcd

Acquired by : Admin  
 Sample Name : je2-172-colm  
 Sample ID : je2-172-colm  
 Vial # :  
 Injection Volume : 10 uL  
 Data File Name : je2-172-colm01.lcd  
 Method File Name : ATH-OD-J-analytical-hplc.lcm  
 Batch File Name :  
 Report File Name : Default.lcr  
 Data Acquired : 7/22/2014 7:35:08 AM  
 Data Processed : 7/22/2014 8:29:40 AM

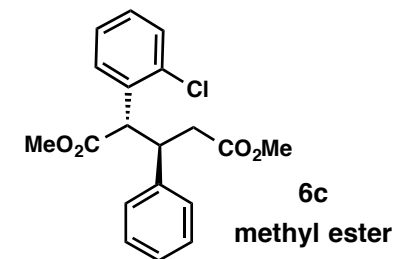

## &lt;Chromatogram&gt;

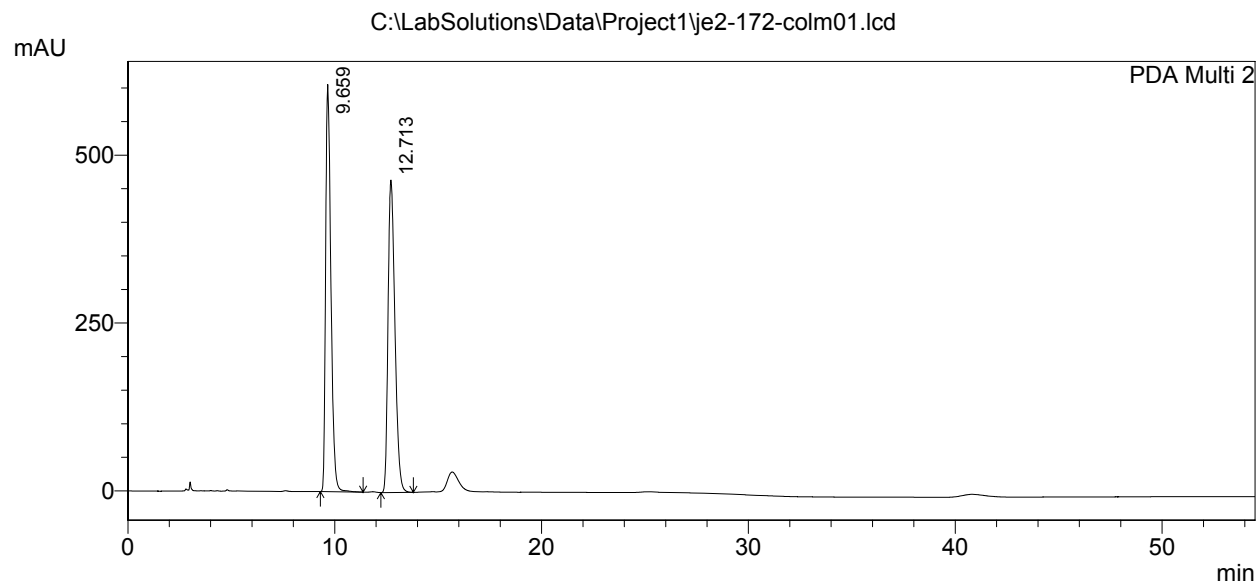

PeakTable

PDA Ch2 215nm 4nm

| Peak# | Ret. Time | Area     | Height  | Area %  | Height % |
|-------|-----------|----------|---------|---------|----------|
| 1     | 9.659     | 10760745 | 606292  | 50.035  | 56.582   |
| 2     | 12.713    | 10745704 | 465228  | 49.965  | 43.418   |
| Total |           | 21506449 | 1071520 | 100.000 | 100.000  |



## ==== Shimadzu LCsolution Analysis Report ====

C:\LabSolutions\Data\Project1\je2-223.lcd

Acquired by : Admin  
 Sample Name : je2-223  
 Sample ID : je2-223  
 Vial # :  
 Injection Volume : 10 uL  
 Data File Name : je2-223.lcd  
 Method File Name : ATH-OD-J-analytical-hplc.lcm  
 Batch File Name :  
 Report File Name : Default.lcr  
 Data Acquired : 10/8/2014 5:30:25 PM  
 Data Processed : 10/8/2014 6:42:07 PM

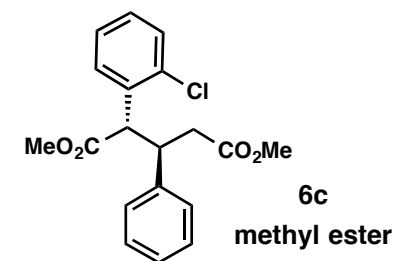

## &lt;Chromatogram&gt;

C:\LabSolutions\Data\Project1\je2-223.lcd

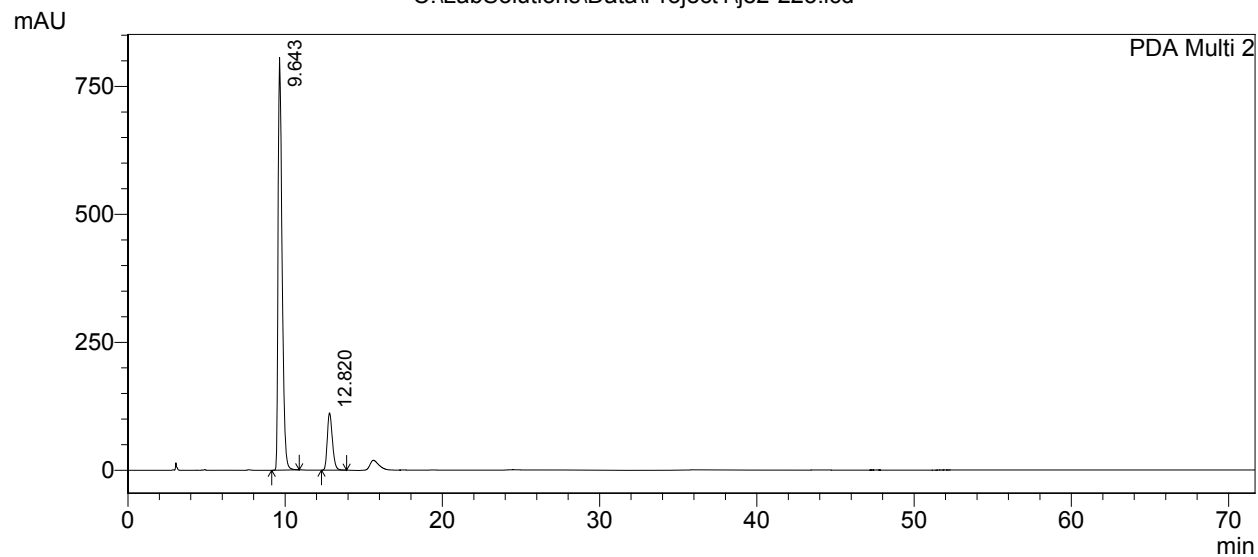

1 PDA Multi 2/215nm 4nm

PeakTable

PDA Ch2 215nm 4nm

| Peak# | Ret. Time | Area     | Height | Area %  | Height % |
|-------|-----------|----------|--------|---------|----------|
| 1     | 9.643     | 14349397 | 806296 | 85.046  | 87.797   |
| 2     | 12.820    | 2523082  | 112073 | 14.954  | 12.203   |
| Total |           | 16872480 | 918368 | 100.000 | 100.000  |

## ==== Shimadzu LCsolution Analysis Report ====

C:\LabSolutions\Data\Project1\je2-216-colm-rac01.lcd

Acquired by : Admin  
 Sample Name : je2-214-colm-rac  
 Sample ID : je2-214-colm-rac  
 Vial # :  
 Injection Volume : 10 uL  
 Data File Name : je2-216-colm-rac01.lcd  
 Method File Name : ATH-OD-J-analytical-hplc.lcm  
 Batch File Name :  
 Report File Name : Default.lcr  
 Data Acquired : 10/4/2014 10:50:40 AM  
 Data Processed : 10/4/2014 12:08:44 PM

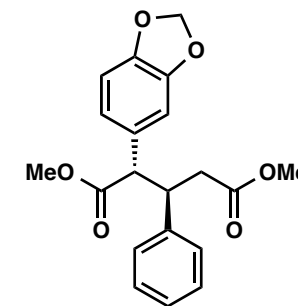

**6d**  
methyl ester

## &lt;Chromatogram&gt;

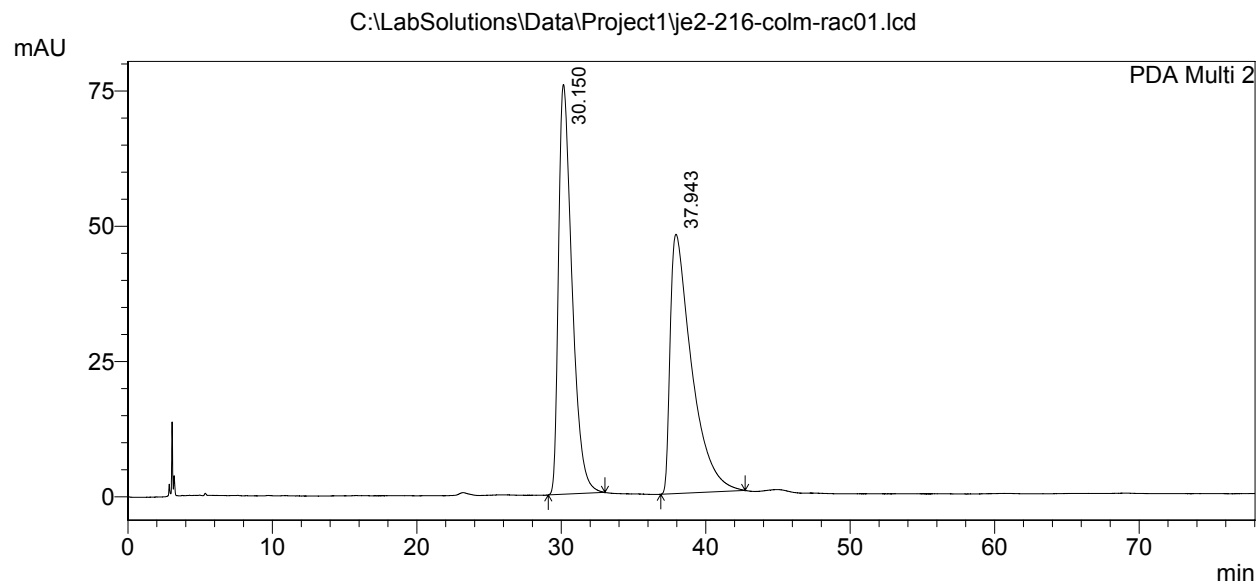

PeakTable

PDA Ch2 215nm 4nm

| Peak# | Ret. Time | Area    | Height | Area %  | Height % |
|-------|-----------|---------|--------|---------|----------|
| 1     | 30.150    | 4914476 | 75717  | 49.859  | 61.249   |
| 2     | 37.943    | 4942323 | 47905  | 50.141  | 38.751   |
| Total |           | 9856799 | 123623 | 100.000 | 100.000  |

## ==== Shimadzu LCsolution Analysis Report ====

C:\LabSolutions\Data\Project1\je2-219-colm-ent01.lcd

Acquired by : Admin  
 Sample Name : je2-219-colm-ent  
 Sample ID : jjj-5-156-a  
 Vail # :  
 Injection Volume : 10 uL  
 Data File Name : je2-219-colm-ent01.lcd  
 Method File Name : ATH-OD-J-analytical-hplc.lcm  
 Batch File Name :  
 Report File Name : Default.lcr  
 Data Acquired : 10/2/2014 2:00:17 PM  
 Data Processed : 10/2/2014 3:55:36 PM

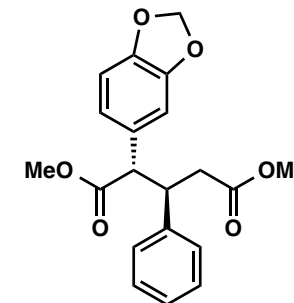

**6d**  
methyl ester

## &lt;Chromatogram&gt;

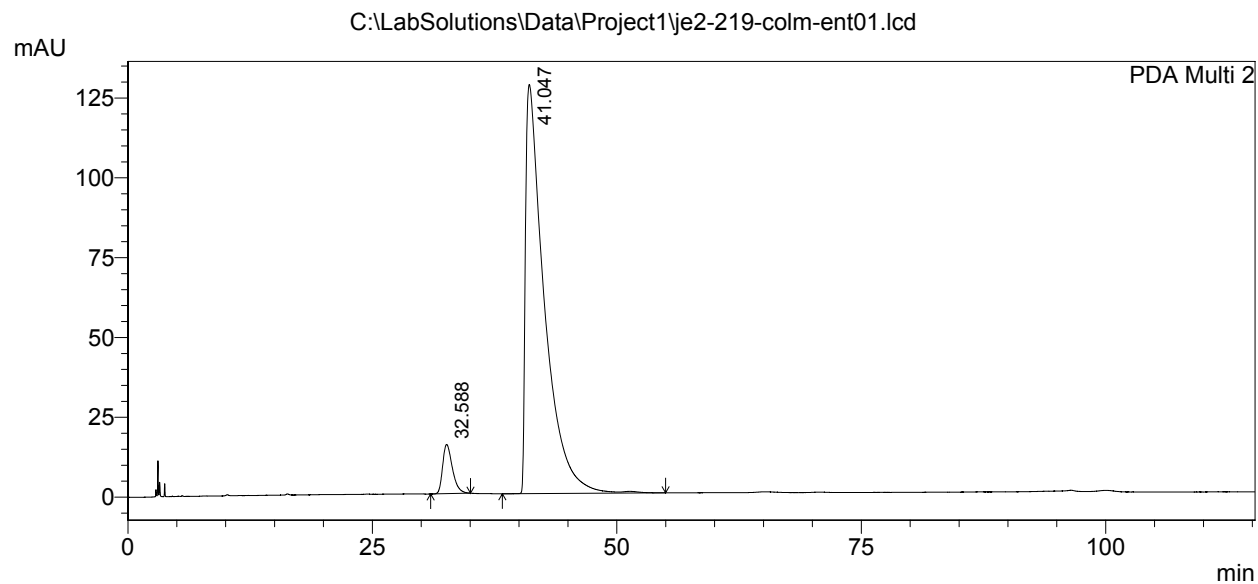

1 PDA Multi 2/215nm 4nm

PeakTable

PDA Ch2 215nm 4nm

| Peak# | Ret. Time | Area     | Height | Area %  | Height % |
|-------|-----------|----------|--------|---------|----------|
| 1     | 32.588    | 1070586  | 15419  | 5.869   | 10.741   |
| 2     | 41.047    | 17170183 | 128130 | 94.131  | 89.259   |
| Total |           | 18240769 | 143549 | 100.000 | 100.000  |

## ==== Shimadzu LCsolution Analysis Report ====

C:\LabSolutions\Data\Project1\PLu\PLu-05-187-Me.lcd

Acquired by : Admin  
 Sample Name : PLu-05-187-Me  
 Sample ID : PLu-05-187-Me  
 Vial # :  
 Injection Volume : 10 uL  
 Data File Name : PLu-05-187-Me.lcd  
 Method File Name : ATH-OD-J-analytical-hplc.lcm  
 Batch File Name :  
 Report File Name : Default.lcr  
 Data Acquired : 7/29/2014 11:38:41 AM  
 Data Processed : 7/30/2014 8:52:58 AM

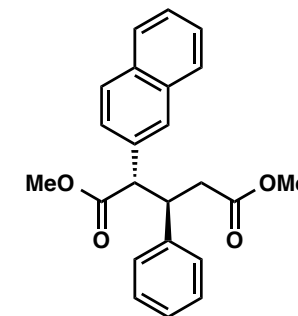

**6e**  
methyl ester

## &lt;Chromatogram&gt;

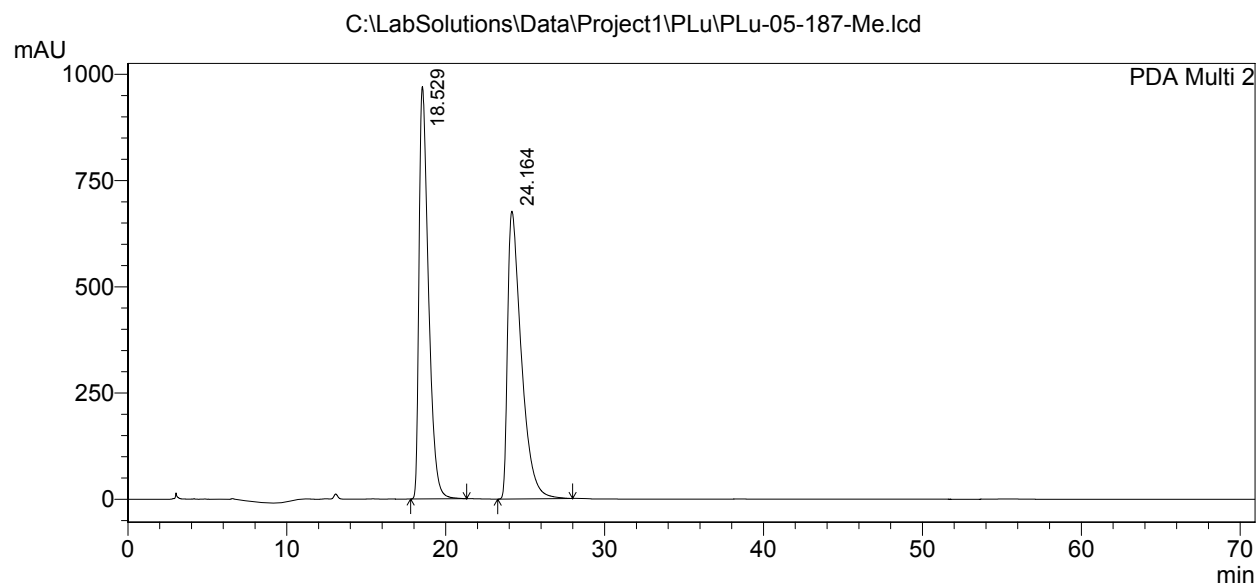

PeakTable

PDA Ch2 215nm 4nm

| Peak# | Ret. Time | Area     | Height  | Area %  | Height % |
|-------|-----------|----------|---------|---------|----------|
| 1     | 18.529    | 40020543 | 970681  | 49.602  | 58.897   |
| 2     | 24.164    | 40662801 | 677426  | 50.398  | 41.103   |
| Total |           | 80683344 | 1648106 | 100.000 | 100.000  |

## ==== Shimadzu LCsolution Analysis Report ====

C:\LabSolutions\Data\Project1\PLu\PLu-05-193-Me-a.lcd

Acquired by : Admin  
 Sample Name : PLu-05-193-Me  
 Sample ID : PLu-05-193-Me  
 Vial # :  
 Injection Volume : 10 uL  
 Data File Name : PLu-05-193-Me-a.lcd  
 Method File Name : ATH-OD-J-analytical-hplc.lcm  
 Batch File Name :  
 Report File Name : Default.lcr  
 Data Acquired : 8/2/2014 1:29:00 PM  
 Data Processed : 8/2/2014 2:06:55 PM

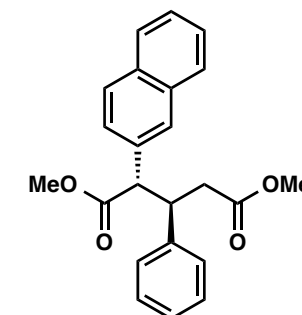

**6e**  
methyl ester

## &lt;Chromatogram&gt;

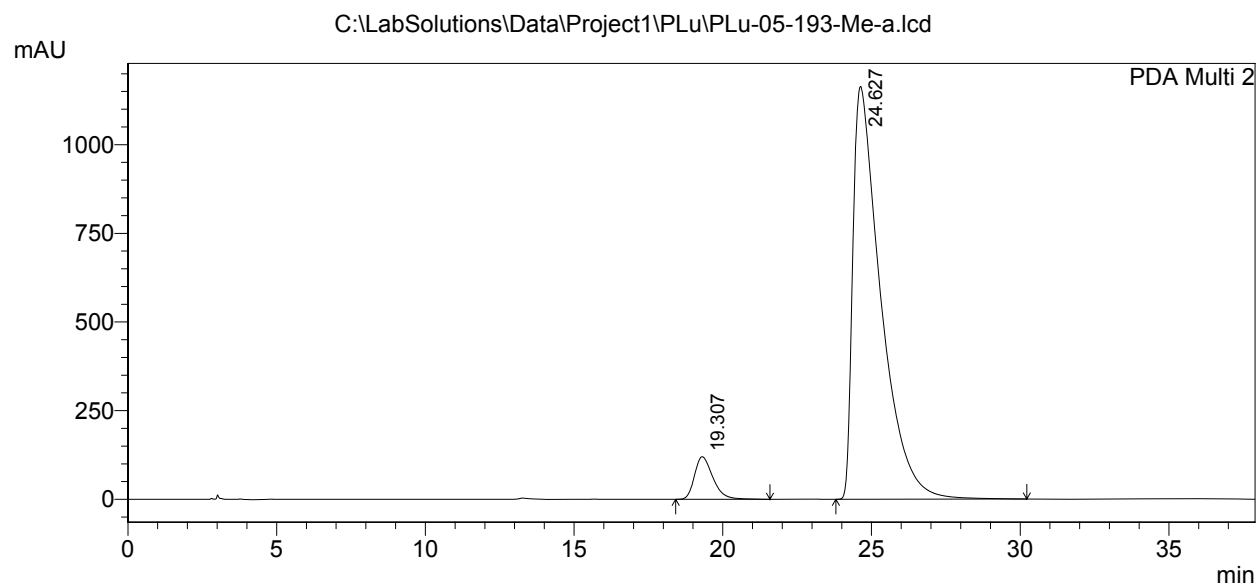

1 PDA Multi 2/215nm 4nm

PeakTable

PDA Ch2 215nm 4nm

| Peak# | Ret. Time | Area     | Height  | Area %  | Height % |
|-------|-----------|----------|---------|---------|----------|
| 1     | 19.307    | 5138993  | 119983  | 6.344   | 9.344    |
| 2     | 24.627    | 75869004 | 1164131 | 93.656  | 90.656   |
| Total |           | 81007996 | 1284113 | 100.000 | 100.000  |

## ==== Shimadzu LCsolution Analysis Report ====

C:\LabSolutions\Data\Project1\PLu\PLu-05-198Me-a.lcd

Acquired by : Admin  
 Sample Name : PLu-05-198Me  
 Sample ID : PLu-05-198Me  
 Vial # :  
 Injection Volume : 10 uL  
 Data File Name : PLu-05-198Me-a.lcd  
 Method File Name : ATH-OD-J-analytical-hplc.lcm  
 Batch File Name :  
 Report File Name : Default.lcr  
 Data Acquired : 8/6/2014 8:41:55 AM  
 Data Processed : 8/6/2014 9:15:26 AM

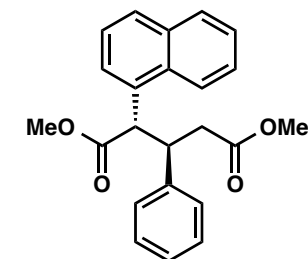

**6f**  
methyl ester

## &lt;Chromatogram&gt;

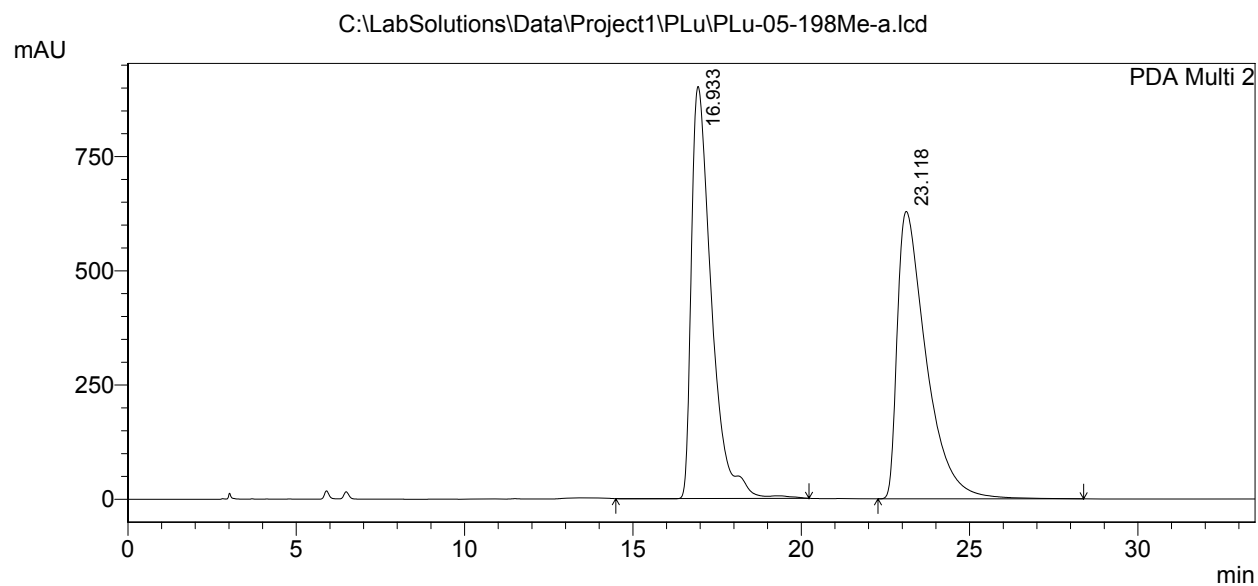

PeakTable

PDA Ch2 215nm 4nm

| Peak# | Ret. Time | Area     | Height  | Area %  | Height % |
|-------|-----------|----------|---------|---------|----------|
| 1     | 16.933    | 37343200 | 901742  | 49.865  | 58.907   |
| 2     | 23.118    | 37545465 | 629040  | 50.135  | 41.093   |
| Total |           | 74888665 | 1530781 | 100.000 | 100.000  |

## ==== Shimadzu LCsolution Analysis Report ====

C:\LabSolutions\Data\Project1\PLu\PLu-05-224-Me-2-a.lcd

Acquired by : Admin  
 Sample Name : PLu-05-224-Me-2  
 Sample ID : PLu-05-224-Me-2  
 Vial # :  
 Injection Volume : 10 uL  
 Data File Name : PLu-05-224-Me-2-a.lcd  
 Method File Name : ATH-OD-J-analytical-hplc.lcm  
 Batch File Name :  
 Report File Name : Default.lcr  
 Data Acquired : 9/2/2014 10:01:31 AM  
 Data Processed : 9/2/2014 10:35:39 AM

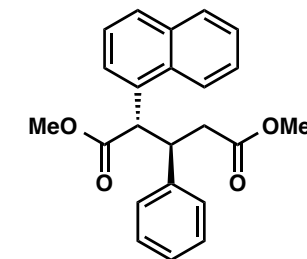

**6f**  
methyl ester

## &lt;Chromatogram&gt;

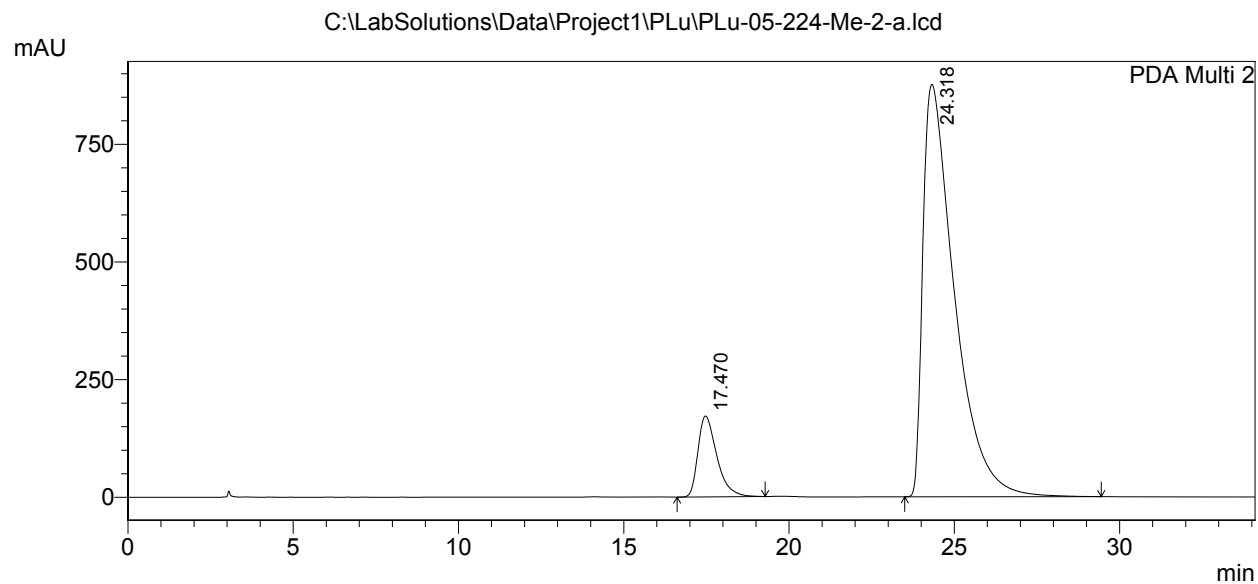

1 PDA Multi 2/215nm 4nm

PeakTable

PDA Ch2 215nm 4nm

| Peak# | Ret. Time | Area     | Height  | Area %  | Height % |
|-------|-----------|----------|---------|---------|----------|
| 1     | 17.470    | 6833972  | 171837  | 10.524  | 16.400   |
| 2     | 24.318    | 58101912 | 875966  | 89.476  | 83.600   |
| Total |           | 64935884 | 1047803 | 100.000 | 100.000  |

## ==== Shimadzu LCsolution Analysis Report ====

C:\LabSolutions\Data\Project1\PLu\PLu-05-216-Me-a.lcd  
Acquired by : Admin  
Sample Name : PLu-05-216-Me  
Sample ID : PLu-05-216-Me  
Vial # :  
Injection Volume : 10 uL  
Data File Name : PLu-05-216-Me-a.lcd  
Method File Name : ATH-OD-J-analytical-hplc.lcm  
Batch File Name :  
Report File Name : Default.lcr  
Data Acquired : 8/20/2014 10:03:49 AM  
Data Processed : 8/20/2014 10:51:11 AM

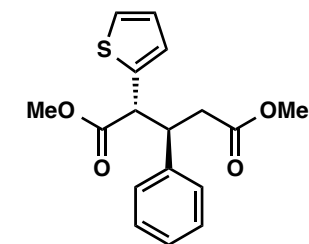

6g  
methyl ester

## &lt;Chromatogram&gt;

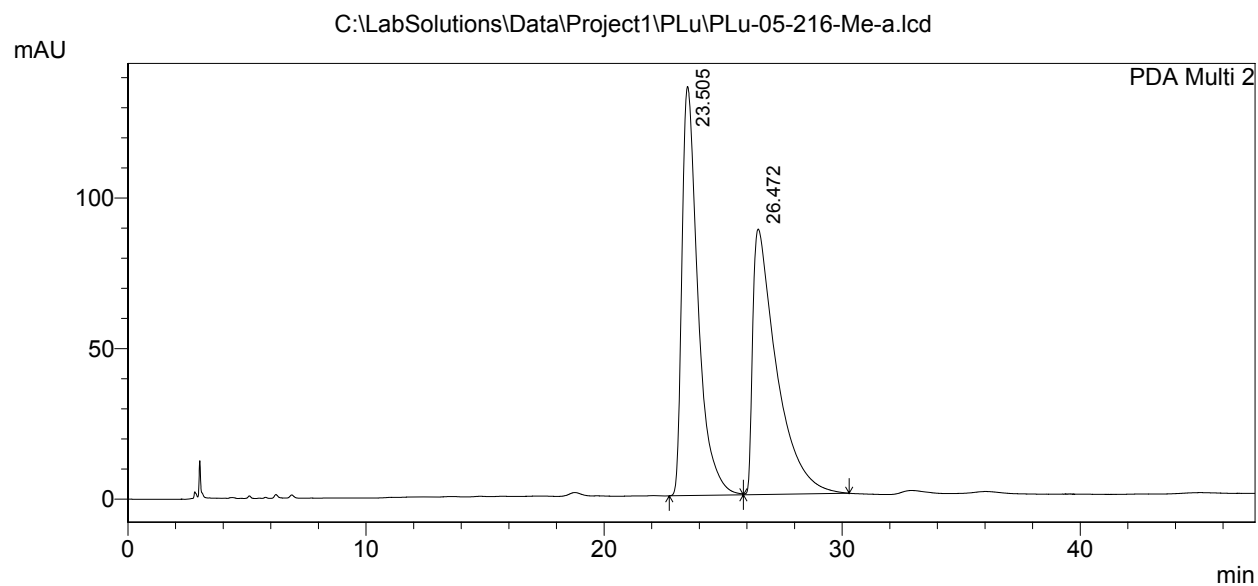

1 PDA Multi 2/215nm 4nm

PeakTable

PDA Ch2 215nm 4nm

| Peak# | Ret. Time | Area     | Height | Area %  | Height % |
|-------|-----------|----------|--------|---------|----------|
| 1     | 23.505    | 6373786  | 135920 | 50.938  | 60.644   |
| 2     | 26.472    | 6138927  | 88207  | 49.062  | 39.356   |
| Total |           | 12512713 | 224127 | 100.000 | 100.000  |



## ==== Shimadzu LCsolution Analysis Report ====

C:\LabSolutions\Data\Project1\PLu\PLu-05-219-c.lcd

Acquired by : Admin  
 Sample Name : PLu-05-219  
 Sample ID : PLu-05-219  
 Vial # :  
 Injection Volume : 10 uL  
 Data File Name : PLu-05-219-c.lcd  
 Method File Name : ATH-OD-J-analytical-hplc.lcm  
 Batch File Name :  
 Report File Name : Default.lcr  
 Data Acquired : 8/23/2014 1:13:41 PM  
 Data Processed : 8/23/2014 2:05:16 PM

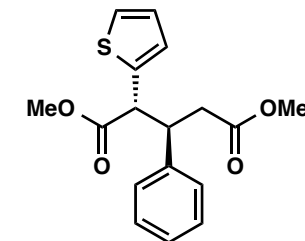

**6g**  
methyl ester

## &lt;Chromatogram&gt;

C:\LabSolutions\Data\Project1\PLu\PLu-05-219-c.lcd

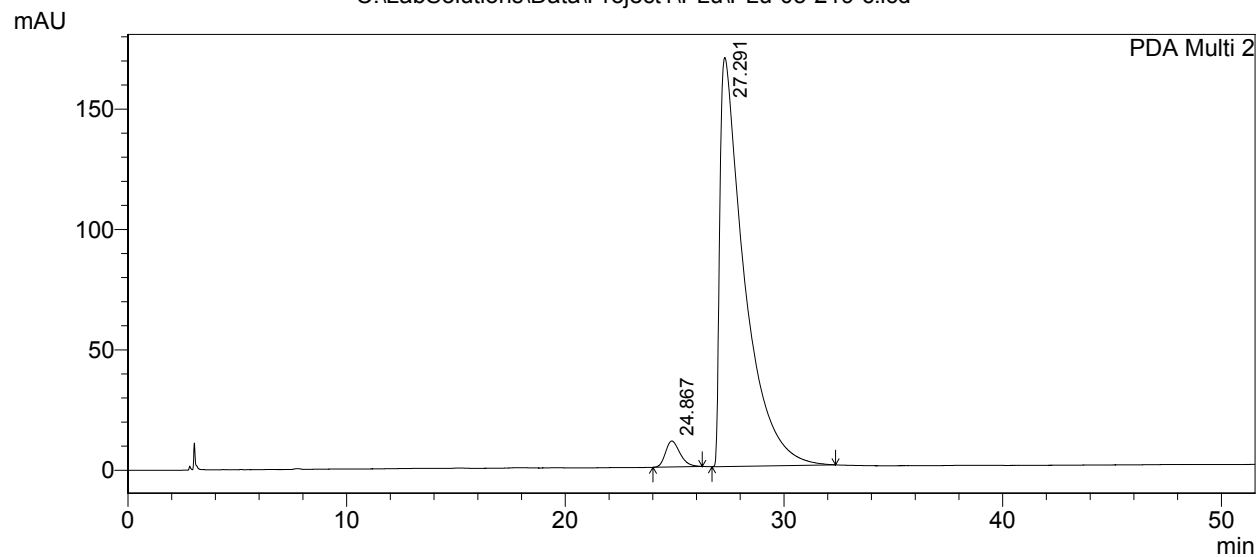

1 PDA Multi 2/215nm 4nm

PeakTable

PDA Ch2 215nm 4nm

| Peak# | Ret. Time | Area     | Height | Area %  | Height % |
|-------|-----------|----------|--------|---------|----------|
| 1     | 24.867    | 497932   | 10792  | 3.639   | 5.972    |
| 2     | 27.291    | 13183422 | 169923 | 96.361  | 94.028   |
| Total |           | 13681353 | 180715 | 100.000 | 100.000  |

## ==== Shimadzu LCsolution Analysis Report ====

C:\LabSolutions\Data\Project1\je2-204-colm\_rac01.lcd

Acquired by : Admin  
 Sample Name : je2-204-colm\_rac  
 Sample ID : je2-204-colm\_rac  
 Vail # :  
 Injection Volume : 10 uL  
 Data File Name : je2-204-colm\_rac01.lcd  
 Method File Name : ATH-OD-J-analytical-hplc.lcm  
 Batch File Name :  
 Report File Name : Default.lcr  
 Data Acquired : 9/15/2014 3:49:28 PM  
 Data Processed : 9/15/2014 5:13:13 PM

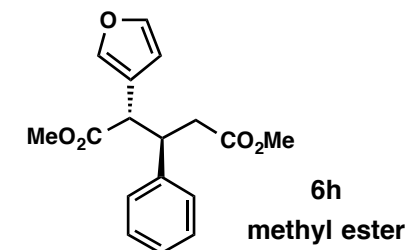

## &lt;Chromatogram&gt;

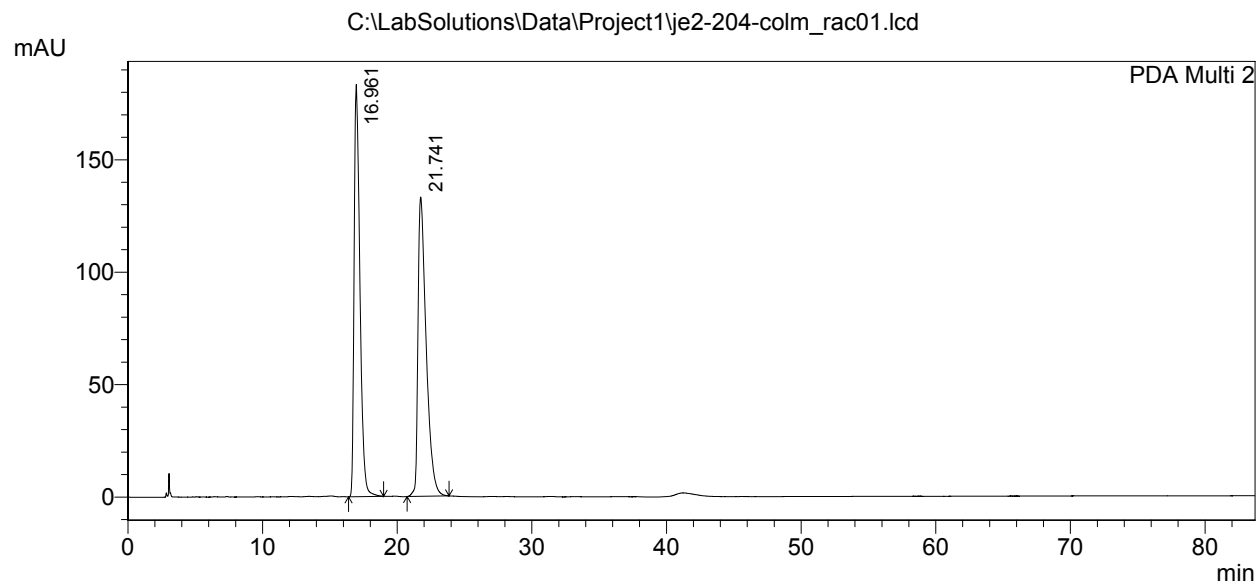

1 PDA Multi 2/215nm 4nm

PeakTable

PDA Ch2 215nm 4nm

| Peak# | Ret. Time | Area     | Height | Area %  | Height % |
|-------|-----------|----------|--------|---------|----------|
| 1     | 16.961    | 5484566  | 183282 | 49.404  | 57.940   |
| 2     | 21.741    | 5616925  | 133048 | 50.596  | 42.060   |
| Total |           | 11101491 | 316330 | 100.000 | 100.000  |

## ==== Shimadzu LCsolution Analysis Report ====

C:\LabSolutions\Data\Project1\je2-233-ent02.lcd

Acquired by : Admin  
 Sample Name : je2-233-ent  
 Sample ID : je2-233-ent  
 Vail # :  
 Injection Volume : 10 uL  
 Data File Name : je2-233-ent02.lcd  
 Method File Name : ATH-OD-J-analytical-hplc.lcm  
 Batch File Name :  
 Report File Name : Default.lcr  
 Data Acquired : 11/12/2014 9:06:25 PM  
 Data Processed : 11/12/2014 10:11:43 PM

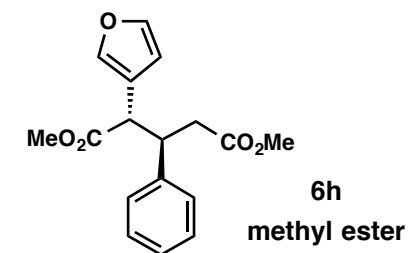

## &lt;Chromatogram&gt;

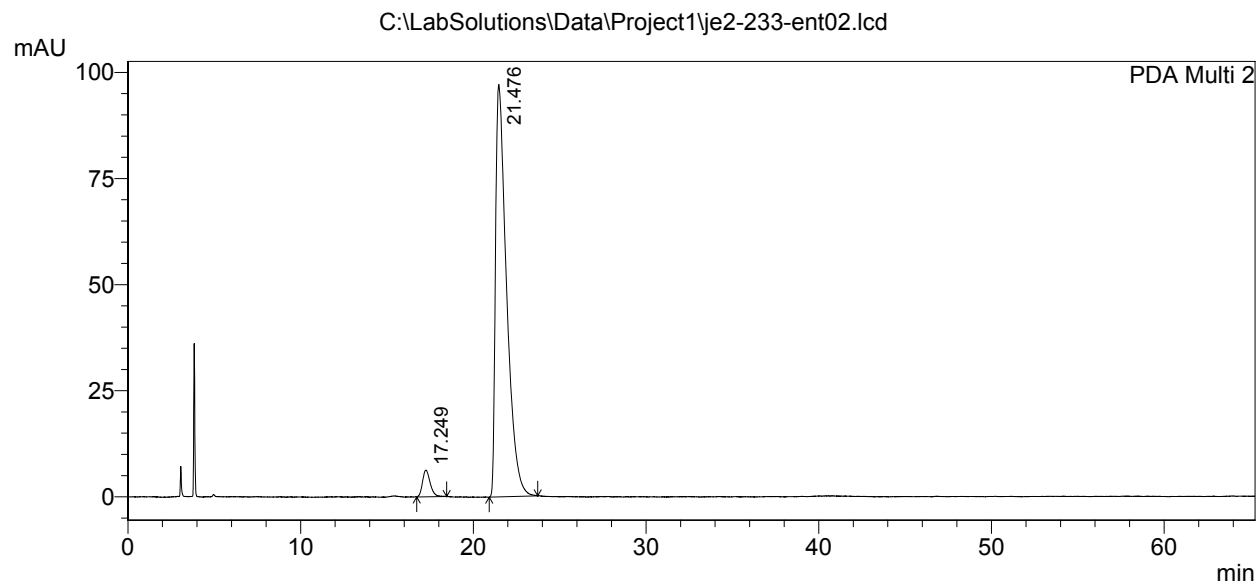

1 PDA Multi 2/215nm 4nm

PeakTable

PDA Ch2 215nm 4nm

| Peak# | Ret. Time | Area    | Height | Area %  | Height % |
|-------|-----------|---------|--------|---------|----------|
| 1     | 17.249    | 192681  | 6303   | 4.267   | 6.091    |
| 2     | 21.476    | 4322727 | 97175  | 95.733  | 93.909   |
| Total |           | 4515408 | 103478 | 100.000 | 100.000  |

## ==== Shimadzu LCsolution Analysis Report ====

C:\LabSolutions\Data\Project1\je2-207-colm\_rac01.lcd

Acquired by : Admin  
 Sample Name : je2-207-colm\_rac  
 Sample ID : je2-207-colm\_rac  
 Vial # :  
 Injection Volume : 10 uL  
 Data File Name : je2-207-colm\_rac01.lcd  
 Method File Name : ATH-OD-J-analytical-hplc.lcm  
 Batch File Name :  
 Report File Name : Default.lcr  
 Data Acquired : 9/15/2014 9:16:57 AM  
 Data Processed : 9/15/2014 10:58:15 AM

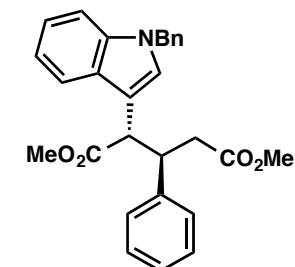**6i****methyl ester**

## &lt;Chromatogram&gt;

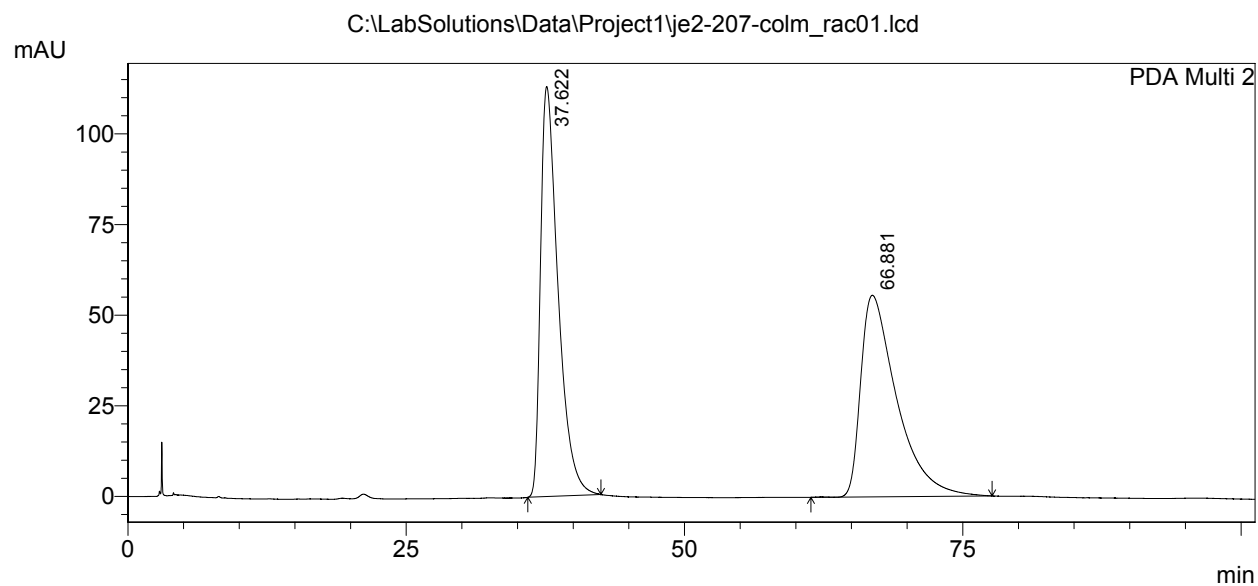

PeakTable

PDA Ch2 215nm 4nm

| Peak# | Ret. Time | Area     | Height | Area %  | Height % |
|-------|-----------|----------|--------|---------|----------|
| 1     | 37.622    | 12401362 | 113128 | 49.864  | 67.041   |
| 2     | 66.881    | 12469076 | 55617  | 50.136  | 32.959   |
| Total |           | 24870438 | 168745 | 100.000 | 100.000  |

## ==== Shimadzu LCsolution Analysis Report ====

C:\LabSolutions\Data\Project1\je2-229-ent03.lcd

Acquired by : Admin  
 Sample Name : je2-229-ent  
 Sample ID : je2-229-ent  
 Vial # :  
 Injection Volume : 10 uL  
 Data File Name : je2-229-ent03.lcd  
 Method File Name : ATH-OD-J-analytical-hplc.lcm  
 Batch File Name :  
 Report File Name : Default.lcr  
 Data Acquired : 10/20/2014 5:52:17 PM  
 Data Processed : 10/20/2014 7:40:58 PM

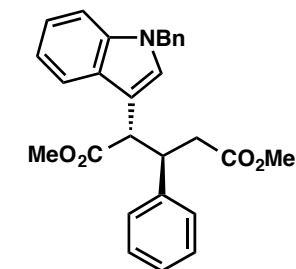

**6i**  
methyl ester

## &lt;Chromatogram&gt;

C:\LabSolutions\Data\Project1\je2-229-ent03.lcd

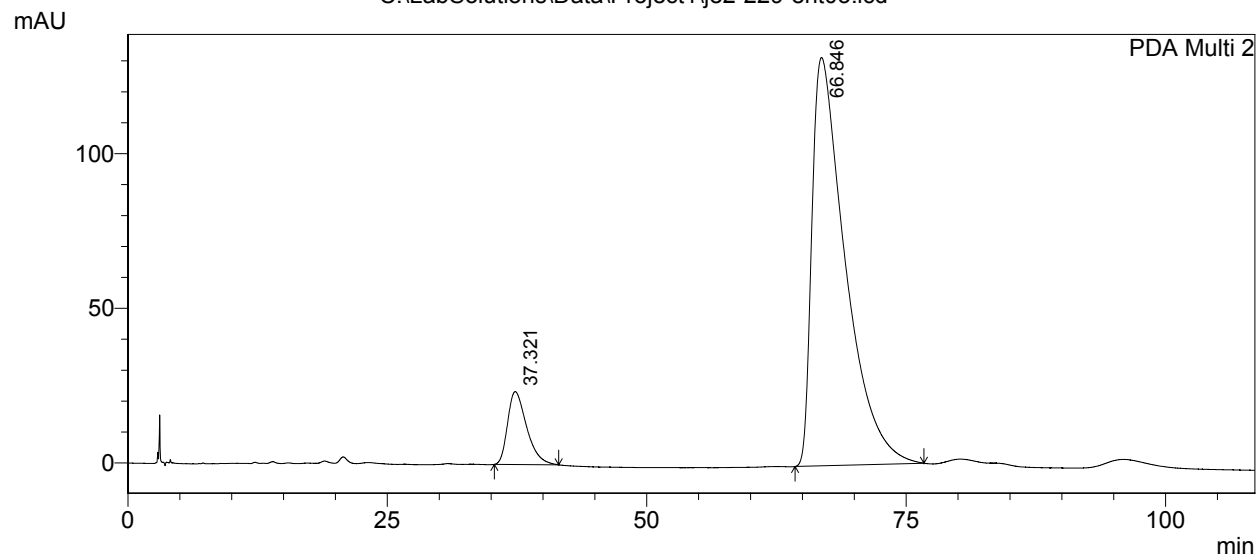

1 PDA Multi 2/215nm 4nm

PeakTable

PDA Ch2 215nm 4nm

| Peak# | Ret. Time | Area     | Height | Area %  | Height % |
|-------|-----------|----------|--------|---------|----------|
| 1     | 37.321    | 3011543  | 23575  | 9.261   | 15.148   |
| 2     | 66.846    | 29505404 | 132055 | 90.739  | 84.852   |
| Total |           | 32516947 | 155630 | 100.000 | 100.000  |

## ==== Shimadzu LCsolution Analysis Report ====

C:\LabSolutions\Data\Project1\PLu\PLu-05-176L.lcd

Acquired by : Admin  
Sample Name : PLu-05-176  
Sample ID : PLu-05-176  
Vial # :  
Injection Volume : 10 uL  
Data File Name : PLu-05-176L.lcd  
Method File Name : ATH-OD-J-analytical-hplc.lcm  
Batch File Name :  
Report File Name : Default.lcr  
Data Acquired : 8/29/2014 11:09:42 AM  
Data Processed : 8/29/2014 11:49:29 AM

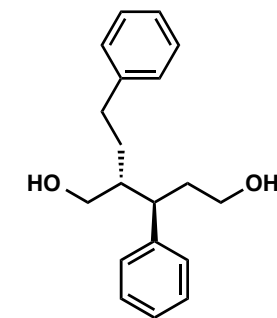**6j**  
**diol**

## &lt;Chromatogram&gt;

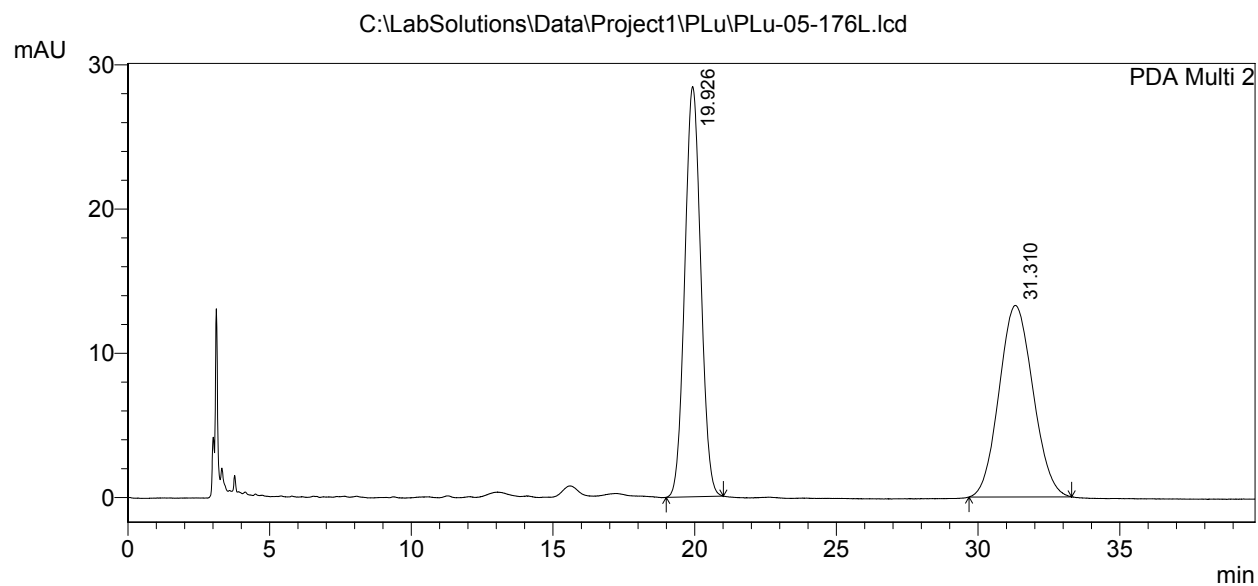

1 PDA Multi 2/215nm 4nm

PeakTable

PDA Ch2 215nm 4nm

| Peak# | Ret. Time | Area    | Height | Area %  | Height % |
|-------|-----------|---------|--------|---------|----------|
| 1     | 19.926    | 1116556 | 28452  | 50.279  | 68.183   |
| 2     | 31.310    | 1104174 | 13277  | 49.721  | 31.817   |
| Total |           | 2220731 | 41729  | 100.000 | 100.000  |

## ==== Shimadzu LCsolution Analysis Report ====

C:\LabSolutions\Data\Project1\PLu\PLu-05-225-a.lcd

Acquired by : Admin  
 Sample Name : PLu-05-225  
 Sample ID : PLu-05-225  
 Vial # :  
 Injection Volume : 10 uL  
 Data File Name : PLu-05-225-a.lcd  
 Method File Name : ATH-OD-J-analytical-hplc.lcm  
 Batch File Name :  
 Report File Name : Default.lcr  
 Data Acquired : 8/29/2014 9:59:29 AM  
 Data Processed : 8/29/2014 12:51:14 PM

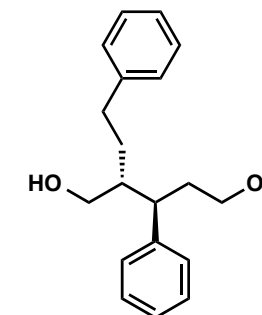

**6j**  
**diol**

## &lt;Chromatogram&gt;

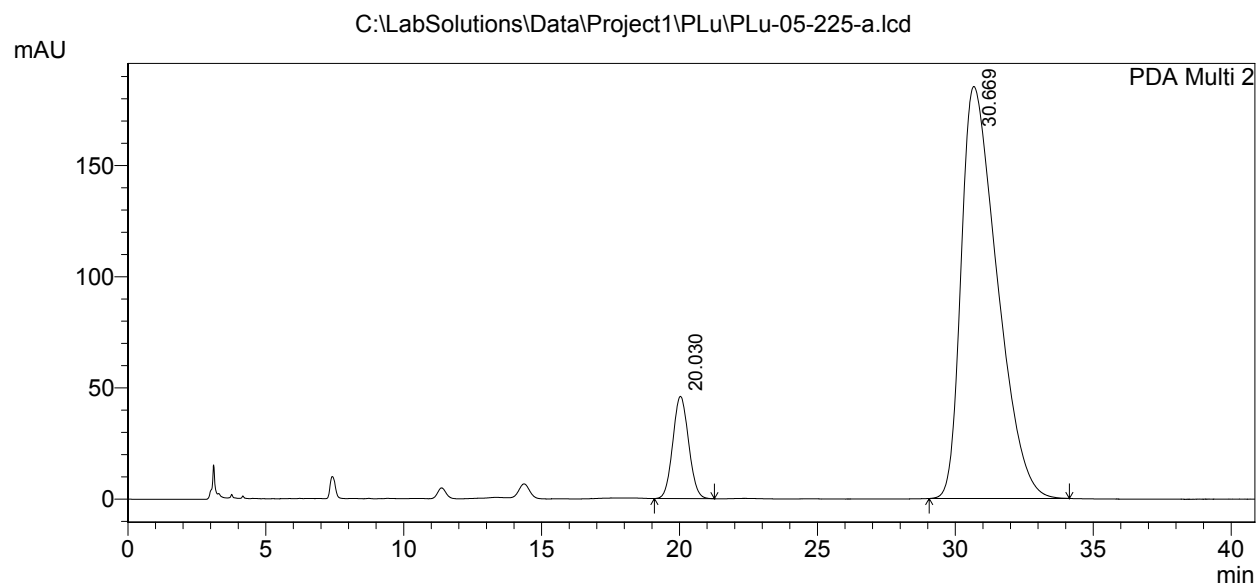

1 PDA Multi 2/215nm 4nm

PeakTable

PDA Ch2 215nm 4nm

| Peak# | Ret. Time | Area     | Height | Area %  | Height % |
|-------|-----------|----------|--------|---------|----------|
| 1     | 20.030    | 1834846  | 45966  | 9.857   | 19.882   |
| 2     | 30.669    | 16779572 | 185230 | 90.143  | 80.118   |
| Total |           | 18614417 | 231196 | 100.000 | 100.000  |

## ==== Shimadzu LCsolution Analysis Report ====

C:\LabSolutions\Data\Project1\PLu-06-72-Me-a.lcd

Acquired by : Admin  
 Sample Name : PLu-06-72-Me  
 Sample ID : PLu-06-72-Me  
 Vial # :  
 Injection Volume : 10 uL  
 Data File Name : PLu-06-72-Me-a.lcd  
 Method File Name : ATH-OD-J-analytical-hplc.lcm  
 Batch File Name :  
 Report File Name : Default.lcr  
 Data Acquired : 1/2/2015 11:53:36 AM  
 Data Processed : 1/2/2015 1:18:53 PM

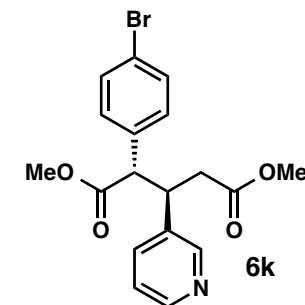methyl  
ester

## &lt;Chromatogram&gt;

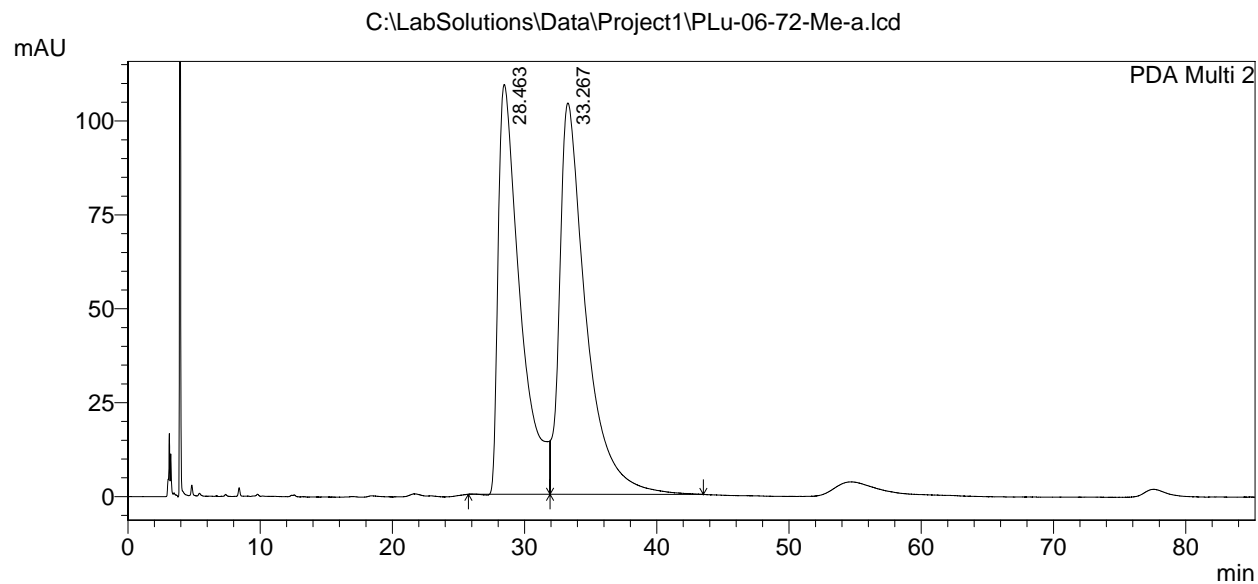

PeakTable

PDA Ch2 210nm 4nm

| Peak# | Ret. Time | Area     | Height | Area %  | Height % |
|-------|-----------|----------|--------|---------|----------|
| 1     | 28.463    | 12585367 | 109122 | 46.545  | 51.154   |
| 2     | 33.267    | 14453549 | 104198 | 53.455  | 48.846   |
| Total |           | 27038917 | 213320 | 100.000 | 100.000  |



## ==== Shimadzu LCsolution Analysis Report ====

C:\LabSolutions\Data\Project1\PLu-06-71-Me-a.lcd

Acquired by : Admin  
 Sample Name : PLu-06-71-Me  
 Sample ID : PLu-06-71-Me  
 Vial # :  
 Injection Volume : 10 uL  
 Data File Name : PLu-06-71-Me-a.lcd  
 Method File Name : ATH-OD-J-analytical-hplc.lcm  
 Batch File Name :  
 Report File Name : Default.lcr  
 Data Acquired : 1/2/2015 10:43:14 AM  
 Data Processed : 1/2/2015 11:51:25 AM

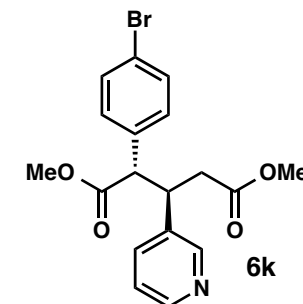methyl  
ester

## &lt;Chromatogram&gt;

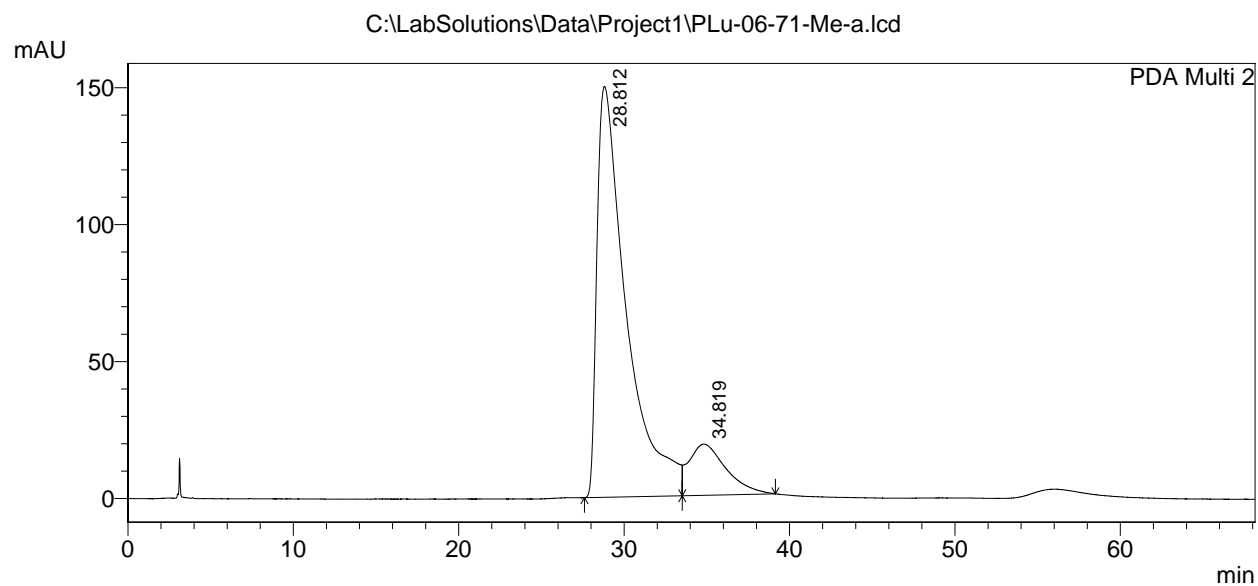

PeakTable

PDA Ch2 210nm 4nm

| Peak# | Ret. Time | Area     | Height | Area %  | Height % |
|-------|-----------|----------|--------|---------|----------|
| 1     | 28.812    | 18469217 | 150011 | 86.337  | 88.922   |
| 2     | 34.819    | 2922714  | 18689  | 13.663  | 11.078   |
| Total |           | 21391931 | 168701 | 100.000 | 100.000  |

## ==== Shimadzu LCsolution Analysis Report ====

C:\LabSolutions\Data\Project1\PLu\PLu-06-12-Me-03.lcd

Acquired by : Admin  
 Sample Name : PLu-06-12-Me  
 Sample ID : PLu-06-12-Me  
 Vail # :  
 Injection Volume : 10 uL  
 Data File Name : PLu-06-12-Me-03.lcd  
 Method File Name : ATH-OD-J-analytical-hplc.lcm  
 Batch File Name :  
 Report File Name : Default.lcr  
 Data Acquired : 10/31/2014 9:54:08 AM  
 Data Processed : 10/31/2014 11:43:52 AM

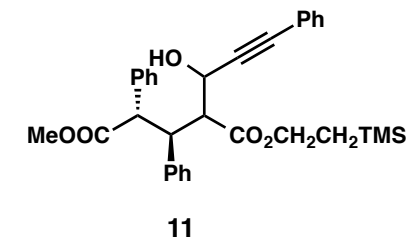

## &lt;Chromatogram&gt;

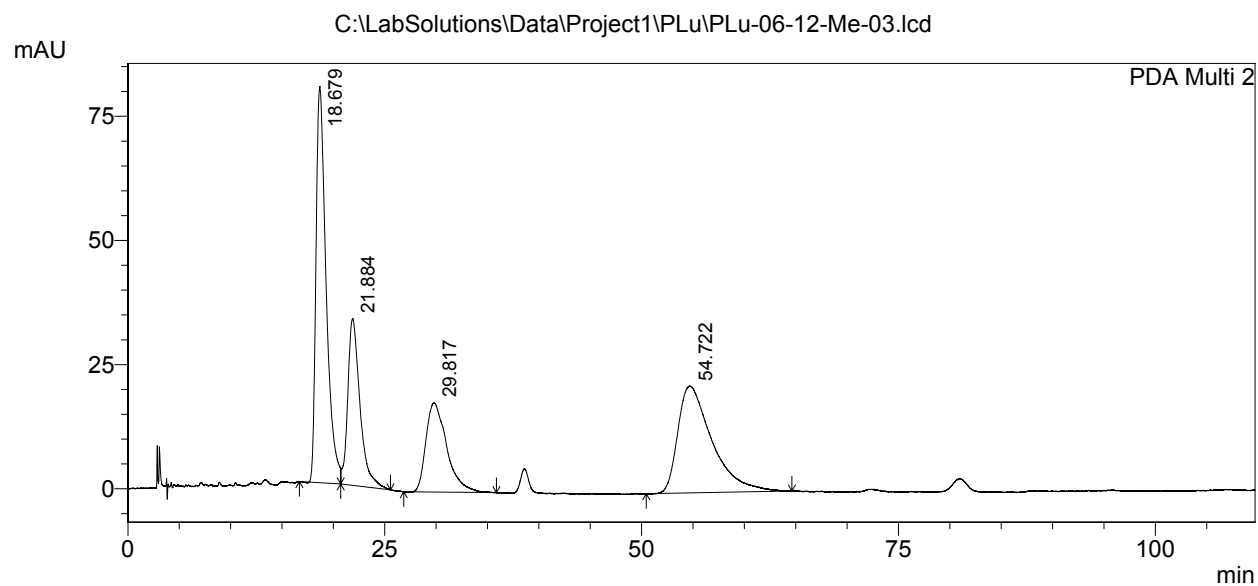

PeakTable

PDA Ch2 210nm 4nm

| Peak# | Ret. Time | Area     | Height | Area %  | Height % |
|-------|-----------|----------|--------|---------|----------|
| 1     | 18.679    | 5473122  | 79790  | 34.795  | 52.200   |
| 2     | 21.884    | 2778905  | 33584  | 17.667  | 21.971   |
| 3     | 29.817    | 2521658  | 17965  | 16.031  | 11.753   |
| 4     | 54.722    | 4955859  | 21516  | 31.507  | 14.076   |
| Total |           | 15729545 | 152855 | 100.000 | 100.000  |

## ==== Shimadzu LCsolution Analysis Report ====

C:\LabSolutions\Data\Project1\PLu\PLu-05-297-Me-01.lcd

Acquired by : Admin  
 Sample Name : PLu-05-297-Me  
 Sample ID : PLu-05-297-Me  
 Vial # :  
 Injection Volume : 10 uL  
 Data File Name : PLu-05-297-Me-01.lcd  
 Method File Name : ATH-OD-J-analytical-hplc.lcm  
 Batch File Name :  
 Report File Name : Default.lcr  
 Data Acquired : 10/31/2014 1:20:42 PM  
 Data Processed : 10/31/2014 2:25:04 PM

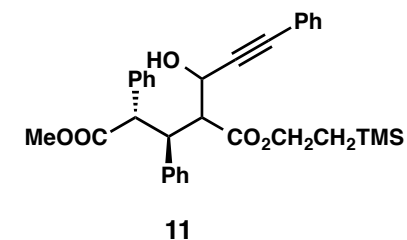

## &lt;Chromatogram&gt;

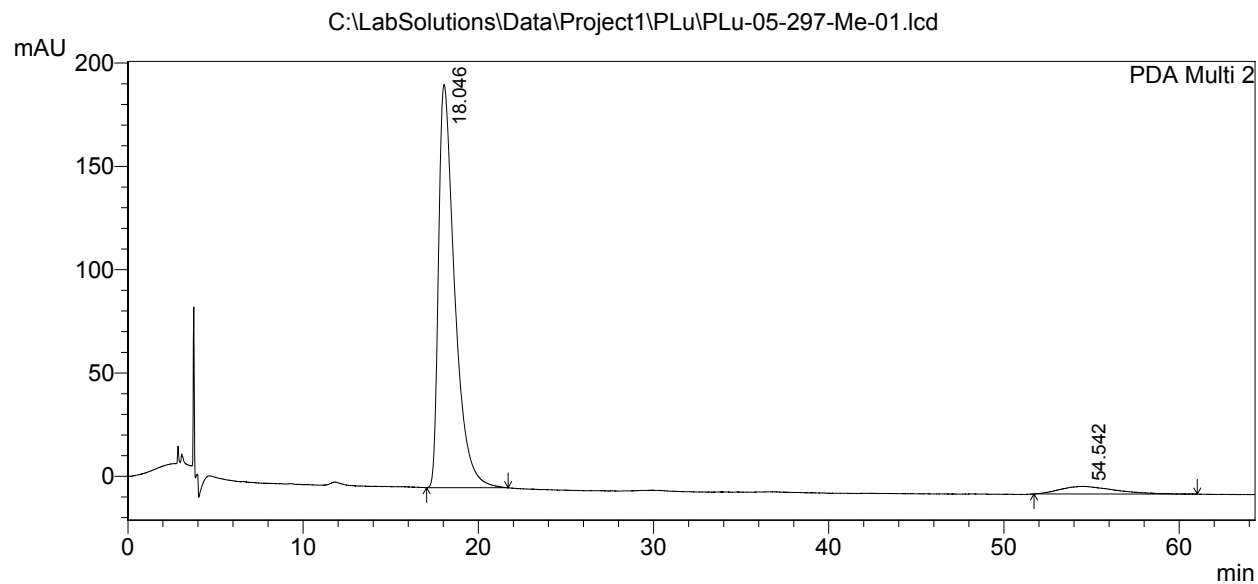

PeakTable

PDA Ch2 215nm 4nm

| Peak# | Ret. Time | Area     | Height | Area %  | Height % |
|-------|-----------|----------|--------|---------|----------|
| 1     | 18.046    | 12459047 | 195156 | 93.974  | 98.145   |
| 2     | 54.542    | 798981   | 3689   | 6.026   | 1.855    |
| Total |           | 13258028 | 198845 | 100.000 | 100.000  |
